# Supplementary material for: Stella modulates transcriptional and endogenous retrovirus programs during maternal-to-zygotic transition
Source: eLife journal article supplement (doi:10.7554/elife.22345), 2017-03-21
Supplement: supp [file elife-22345-supp-v1.zip]

Archive with 19 entries (19 files):
- elife_poa_e22345_Supplementary_File_1.xlsx
- elife_poa_e22345_Figure_1_source_data_4.xlsx
- elife_poa_e22345_Figure_2_Figure_Supplement_1.pdf
- elife_poa_e22345_Figure_1_source_data_2.xlsx
- elife_poa_e22345_Figure_5_Figure_Supplement_1.pdf
- elife_poa_e22345_Figure_3_Figure_Supplement_1.pdf
- elife_poa_e22345_Figure_2_source_data_1.xlsx
- elife_poa_e22345_Supplementary_File_2.xlsx
- elife_poa_e22345_Figure_4_Figure_Supplement_1.pdf
- elife_poa_e22345_Figure_3_Figure_Supplement_2.pdf
- elife_poa_e22345_Figure_1_Figure_Supplement_1.pdf
- elife_poa_e22345_Figure_3_source_data_1.xlsx
- elife_poa_e22345_Figure_3_Figure_Supplement_3.pdf
- elife_poa_e22345_Figure_2_source_data_2.xlsx
- elife_poa_e22345_Figure_1_Figure_Supplement_2.pdf
- elife_poa_e22345_Supplementary_File_3.xlsx
- elife_poa_e22345_Figure_3_source_data_2.xlsx
- elife_poa_e22345_Figure_1_source_data_3.xlsx
- elife_poa_e22345_Figure_1_source_data_1.xlsx
