# Supplementary material for: Stella modulates transcriptional and endogenous retrovirus programs during maternal-to-zygotic transition
Source: eLife journal article supplement (doi:10.7554/elife.22345), 2017-03-21
Supplement: supp [file elife-22345-supp-v1.zip › elife_poa_e22345_Figure_1_source_data_1.xlsx]

## Sheet: geneCountRUVs_oocyte_1cell_2cel
Figure 1 – source data 1. Gene counts for WT and KO oocyte, 1-cell and 2-cell embryos. Gene counts for 66 samples from single cell / embryo RNA-seq experiments. Removal of Unwanted Variation analysis has been performed to control for potentially confounding technical factors.
	WT_oocyte_1	WT_oocyte_2	WT_oocyte_3	WT_oocyte_4	WT_oocyte_5	WT_oocyte_6	WT_oocyte_7	WT_oocyte_8	WT_oocyte_9	WT_oocyte_10	WT_oocyte_11	WT_oocyte_12	KO_oocyte_1	KO_oocyte_2	KO_oocyte_3	KO_oocyte_4	KO_oocyte_5	KO_oocyte_6	KO_oocyte_7	KO_oocyte_8	KO_oocyte_9	KO_oocyte_10	KO_oocyte_11	KO_oocyte_12	WT_1_cell_1	WT_1_cell_2	WT_1_cell_3	WT_1_cell_4	WT_1_cell_5	WT_1_cell_6	WT_1_cell_7	WT_1_cell_8	WT_1_cell_9	WT_1_cell_10	WT_1_cell_11	WT_1_cell_12	KO_1_cell_1	KO_1_cell_2	KO_1_cell_3	KO_1_cell_4	KO_1_cell_5	KO_1_cell_6	KO_1_cell_7	KO_1_cell_8	KO_1_cell_9	KO_1_cell_10	KO_1_cell_11	KO_1_cell_12	WT_2_cell_1
ENSMUSG00000000001	1490	1431	1612	1647	1522	1356	1526	1697	1505	1353	1701	1533	1535	1705	1691	1706	1858	2034	2179	1628	1377	1780	1399	1649	1119	1469	1355	1237	1387	1500	1182	1214	1298	1339	1215	1131	1216	1199	1085	1136	1215	1150	1277	1034	1389	1383	1080	1224	362
ENSMUSG00000000028	1411	1110	530	1539	1040	1103	1400	1185	1032	1290	1407	1645	922	880	832	863	898	789	679	1041	918	1032	1215	1256	1696	1002	1031	1847	1823	1330	1617	994	1090	1073	717	852	1587	1667	1041	877	1315	1101	774	1430	1038	1155	728	983	772
ENSMUSG00000000031	0	0	0	0	0	0	0	0	0	0	0	0	0	0	0	0	1	0	0	0	0	0	0	0	0	0	0	0	0	0	0	0	0	0	0	0	0	0	0	0	0	10	0	0	1	0	0	0	0
ENSMUSG00000000037	601	725	979	424	518	610	674	810	671	619	696	774	811	810	1024	990	1072	1097	1254	621	693	679	662	588	471	483	462	384	408	473	390	483	386	406	378	337	495	424	444	446	514	473	467	405	559	598	727	488	610
ENSMUSG00000000049	0	0	0	0	0	0	0	0	0	0	0	0	0	0	0	0	0	1	0	0	0	0	0	0	0	0	0	0	0	0	0	0	0	0	0	0	0	0	0	0	0	0	0	0	0	0	0	0	0
ENSMUSG00000000056	6	23	11	44	38	24	27	14	38	25	17	14	33	39	23	36	28	67	71	37	32	36	51	41	58	38	37	10	29	18	20	50	27	36	35	38	29	60	41	33	17	21	45	35	26	63	51	65	13
ENSMUSG00000000058	0	0	0	0	0	0	0	0	0	0	0	4	0	0	0	2	1	8	0	0	1	0	0	0	0	0	0	0	0	0	3	0	0	0	0	0	0	0	0	0	0	1	0	0	0	0	0	0	0
ENSMUSG00000000078	55	43	17	48	27	95	108	25	44	99	28	93	115	49	74	27	8	108	53	19	34	82	86	49	25	78	45	47	38	29	53	29	53	46	26	46	136	68	9	57	18	59	121	34	21	31	87	116	39
ENSMUSG00000000085	433	558	430	392	347	512	374	408	375	409	286	407	410	372	340	386	337	440	282	379	476	286	303	497	405	206	180	525	418	329	353	468	419	322	406	376	378	268	424	414	438	228	308	277	341	256	428	256	635
ENSMUSG00000000088	125	145	219	136	106	84	73	53	72	72	55	45	83	136	154	136	124	207	91	113	96	39	96	112	132	213	177	142	109	84	119	137	248	226	134	388	136	137	195	106	96	174	214	213	97	123	136	177	306
ENSMUSG00000000093	1	2	2	2	1	4	1	2	2	2	1	1	2	3	6	1	4	4	18	1	1	1	1	1	1	2	2	1	1	1	1	1	1	2	2	2	1	0	1	2	1	1	1	1	1	2	2	4	15
ENSMUSG00000000094	45	20	56	29	32	53	52	25	18	47	57	29	41	29	76	66	46	56	24	32	26	20	15	38	28	56	17	17	27	29	22	49	22	60	62	75	42	28	40	52	30	42	35	38	35	42	48	39	79
ENSMUSG00000000103	0	0	0	0	0	0	0	0	0	0	0	0	0	0	0	0	0	0	0	0	0	0	0	0	0	0	0	0	0	0	0	0	0	0	0	0	0	0	0	0	0	0	0	0	0	0	0	0	0
ENSMUSG00000000120	0	1	0	1	0	2	0	0	0	0	0	0	1	1	0	0	3	0	0	0	0	0	0	0	0	0	0	0	0	0	0	0	0	0	0	0	0	0	0	0	0	0	0	0	0	0	0	0	16
ENSMUSG00000000125	0	0	0	0	0	0	0	0	0	0	0	0	0	0	0	0	2	1	0	0	11	0	0	0	0	0	0	3	0	0	0	0	0	0	0	0	4	0	0	0	0	0	0	0	0	0	0	9	0
ENSMUSG00000000126	0	0	0	0	0	0	1	0	0	0	0	0	0	0	1	0	0	1	0	0	0	0	0	0	0	0	0	0	1	0	0	1	0	0	0	0	0	0	0	0	0	0	1	0	0	0	0	0	0
ENSMUSG00000000127	619	719	346	557	810	710	805	783	830	843	745	870	789	732	599	612	647	493	637	856	1030	920	848	1064	1088	927	736	927	625	1202	744	1005	980	893	814	813	1585	968	1343	1021	1040	726	1137	1154	865	1014	1203	1177	412
ENSMUSG00000000131	1077	872	768	987	1108	894	1351	1065	896	1009	882	589	650	926	1110	911	1051	937	764	881	728	1004	835	1161	1091	1015	918	1204	1016	801	1077	685	1109	685	520	710	754	849	767	657	938	729	718	745	894	698	674	938	409
ENSMUSG00000000134	758	1010	1000	1292	1146	920	977	858	1028	1097	866	672	821	887	634	735	893	975	650	751	651	876	1142	692	1273	1184	1177	1192	1181	943	1050	975	1067	824	865	1051	890	926	786	765	1179	1061	639	793	1247	780	801	795	458
ENSMUSG00000000142	185	145	113	120	129	141	126	149	203	265	281	278	228	165	170	210	263	189	274	155	166	112	90	163	187	210	133	176	176	158	124	290	171	110	260	121	110	145	155	155	191	140	173	147	156	111	203	216	338
ENSMUSG00000000148	444	13	9	20	12	20	10	10	60	11	13	15	19	22	15	12	11	28	9	21	7	13	13	10	144	84	7	12	11	15	14	9	10	10	38	10	26	144	11	8	29	108	56	9	7	10	9	10	62
ENSMUSG00000000149	1495	1489	1939	1776	2323	1238	1997	1729	1803	1753	1724	1645	1605	1628	1911	1716	1850	2351	1545	1880	1136	1445	1704	1818	1777	1520	1295	1358	2094	1011	1608	1404	1814	1412	1118	1320	1202	1631	1246	1418	1803	1491	1442	1259	1330	1358	1120	811	771
ENSMUSG00000000154	0	0	0	0	0	0	0	0	0	0	0	0	0	0	0	0	0	4	0	0	0	0	0	0	0	0	0	0	0	0	0	0	0	0	0	2	0	0	0	0	0	0	0	0	8	0	1	1	0
ENSMUSG00000000157	1	0	0	1	0	0	0	0	0	0	0	0	1	1	0	0	0	0	0	0	0	0	0	0	0	0	0	0	0	0	0	0	0	0	0	0	0	0	0	0	0	0	16	0	0	0	0	0	0
ENSMUSG00000000159	0	0	0	0	0	0	0	0	0	0	0	0	0	0	0	4	0	0	0	0	0	0	0	0	0	0	0	0	0	0	0	0	0	0	0	0	0	0	0	0	0	0	0	0	0	0	0	0	0
ENSMUSG00000000167	5	14	1	0	1	4	9	0	0	13	1	1	0	1	3	1	1	1	1	1	0	1	1	7	6	4	1	7	0	1	6	0	0	0	3	19	0	1	0	2	0	0	7	4	0	8	6	1	0
ENSMUSG00000000168	241	178	81	152	157	147	162	143	145	116	131	153	94	132	189	115	173	114	124	133	149	136	146	160	163	135	187	228	183	186	109	121	156	182	92	116	151	151	156	152	117	85	91	127	121	170	98	107	243
ENSMUSG00000000171	32	66	96	23	25	48	70	18	13	66	102	61	34	137	88	42	55	16	157	37	29	34	24	47	84	70	33	58	58	76	2	32	7	24	23	92	46	93	18	60	89	46	85	90	80	31	31	25	21
ENSMUSG00000000182	0	0	0	0	0	0	0	0	0	0	0	0	0	0	0	0	0	0	0	0	0	0	0	0	0	0	0	0	0	0	0	0	0	0	0	0	0	0	0	0	0	0	0	0	0	0	0	0	0
ENSMUSG00000000183	0	18	1	0	4	0	2	0	4	0	0	0	9	0	7	0	0	0	1	11	1	1	1	4	0	2	0	0	0	7	0	14	0	4	15	0	5	1	9	4	0	13	0	0	0	0	8	1	0
ENSMUSG00000000184	3	3	28	3	2	1	2	12	2	4	2	21	3	3	1	20	63	3	9	16	41	48	1	22	2	2	5	2	84	2	2	9	1	2	4	2	10	1	26	1	1	1	22	192	2	2	58	3	0
ENSMUSG00000000194	631	873	304	1507	153	289	172	206	258	461	74	189	369	22	1183	211	1310	816	33	272	420	683	259	447	242	204	122	32	119	85	469	124	64	169	259	74	590	460	110	199	220	196	155	405	347	210	152	73	98
ENSMUSG00000000197	3	5	2	5	6	3	7	7	5	11	3	9	11	7	7	3	6	8	5	14	4	6	4	8	9	20	11	14	7	8	11	5	8	19	16	8	7	8	9	13	9	22	12	13	3	10	10	12	7
ENSMUSG00000000202	0	0	0	0	0	0	0	0	0	0	1	1	0	0	0	0	0	2	0	0	0	2	0	0	0	3	0	1	0	0	4	2	0	0	1	1	1	0	0	0	0	0	1	0	0	0	1	0	0
ENSMUSG00000000204	0	0	0	0	0	0	0	0	0	0	0	0	0	0	0	0	0	1	0	0	0	0	0	0	0	0	0	0	0	0	0	0	0	0	0	0	0	0	0	0	0	0	0	0	0	0	0	0	0
ENSMUSG00000000214	1009	770	846	1065	1097	1024	1174	1168	1256	804	886	863	983	633	730	607	750	746	577	831	702	704	921	923	1507	839	1051	1367	1368	778	1419	1128	948	899	851	986	1163	1424	1165	859	1017	936	931	1005	1164	1147	853	1043	428
ENSMUSG00000000215	14	60	19	16	30	12	30	29	22	92	65	16	17	14	103	73	18	48	10	94	82	29	71	31	2	23	31	46	25	38	5	16	31	27	32	10	34	77	63	33	38	2	29	79	39	14	80	2	0
ENSMUSG00000000223	0	0	0	0	0	0	0	0	0	0	0	0	0	0	0	0	0	0	0	0	0	0	0	0	0	0	0	0	0	0	0	0	0	0	0	0	0	0	0	0	0	0	0	2	0	0	0	0	0
ENSMUSG00000000244	0	0	0	0	0	0	0	0	0	0	0	0	0	0	0	0	1	0	0	0	0	0	0	0	0	0	0	0	0	0	0	0	0	0	0	0	0	0	0	0	0	0	0	0	0	0	0	1	0
ENSMUSG00000000247	12	20	45	27	20	13	15	16	20	25	15	13	15	10	20	10	11	15	12	7	19	6	4	21	17	22	27	16	25	8	9	36	36	37	77	62	7	8	22	8	10	15	17	12	8	14	18	17	12
ENSMUSG00000000248	0	0	1	0	0	0	0	0	0	0	0	0	0	0	0	0	0	0	0	0	0	0	0	0	0	0	0	0	0	0	0	0	0	0	0	0	0	0	0	0	0	0	0	0	0	0	0	0	0
ENSMUSG00000000253	194	54	33	276	95	84	57	63	82	15	88	47	4	206	267	49	128	60	91	74	56	22	78	82	55	7	73	50	135	5	26	30	25	84	41	12	53	69	40	73	69	95	168	37	104	60	109	130	55
ENSMUSG00000000263	0	0	0	0	0	0	0	0	0	0	0	0	0	0	0	0	0	0	0	0	0	0	0	0	0	0	0	0	1	0	0	0	0	0	0	0	0	0	0	0	0	0	0	0	0	0	0	0	0
ENSMUSG00000000266	0	0	0	0	0	0	0	0	0	0	0	0	0	0	0	0	0	0	0	0	0	0	0	1	0	0	0	0	0	0	0	0	0	0	0	0	0	0	0	0	0	0	0	0	0	0	0	0	0
ENSMUSG00000000275	4	5	4	5	4	4	5	5	5	5	5	5	5	5	5	4	4	28	4	4	4	5	4	5	5	5	5	5	5	4	4	4	4	5	4	5	5	4	4	5	4	5	5	4	5	5	5	10	10
ENSMUSG00000000276	648	612	1475	577	657	655	614	805	728	750	1005	1161	789	784	668	897	989	1213	1019	766	858	828	643	627	289	375	349	473	332	612	391	662	797	737	790	472	452	304	282	554	507	394	561	403	425	768	308	485	781
ENSMUSG00000000278	1408	1376	1170	1385	1811	1551	2013	2007	1912	1993	2386	2586	1334	1209	1374	1201	1504	1299	1205	1819	1780	1539	1057	1469	1749	1835	1731	2031	1943	1769	1735	2094	2033	1676	1406	2076	2232	1709	1682	1968	1514	1455	1438	2176	1544	1747	1790	1595	1138
ENSMUSG00000000282	12	4	8	22	12	22	5	19	5	15	9	5	17	9	16	16	11	35	11	11	26	8	10	8	10	20	10	11	3	5	20	11	7	12	0	14	21	5	2	13	22	5	20	19	7	21	7	16	11
ENSMUSG00000000290	0	0	0	0	0	4	0	0	0	0	0	0	10	0	0	0	0	0	10	1	0	0	11	0	0	0	3	13	0	0	3	0	5	0	0	0	14	0	31	0	10	0	4	5	0	22	0	0	0
ENSMUSG00000000295	0	0	0	0	0	0	1	0	0	0	0	0	0	0	0	0	0	0	1	0	0	0	0	0	0	1	0	0	0	1	0	0	0	0	0	0	1	0	0	2	0	0	0	0	0	0	1	0	0
ENSMUSG00000000296	9	17	15	12	15	18	28	26	10	14	16	36	14	6	20	5	23	7	9	20	10	11	12	4	27	15	30	38	25	12	20	22	20	26	3	24	18	19	10	11	13	13	11	23	21	12	12	17	1
ENSMUSG00000000301	127	90	111	99	103	62	119	204	124	92	47	30	102	68	217	105	133	165	159	99	262	108	210	130	185	174	169	350	261	371	133	238	32	151	106	113	306	163	191	241	102	292	121	120	86	256	222	205	194
ENSMUSG00000000303	870	1144	787	1227	1553	902	1539	1086	1319	1488	1073	1252	884	728	854	681	1010	997	576	1348	876	616	1044	1342	901	855	839	1362	1355	955	1258	1300	1702	1219	1327	1204	811	1128	552	848	795	715	1075	1513	730	971	931	1002	190
ENSMUSG00000000305	693	771	805	844	808	917	980	746	742	846	898	898	554	501	478	560	390	647	591	449	689	572	445	698	835	809	759	1076	808	859	945	728	816	1026	1055	995	389	648	816	969	617	498	830	931	662	528	595	395	89
ENSMUSG00000000308	0	0	0	0	0	0	0	0	0	0	0	0	1	0	0	0	1	0	0	0	0	0	2	0	1	0	0	0	0	0	0	0	3	0	0	0	0	0	0	0	1	1	0	0	0	0	0	1	0
ENSMUSG00000000317	1	0	0	1	0	0	0	0	3	0	0	0	0	1	0	0	0	3	0	0	0	0	0	0	0	0	0	0	0	0	0	0	0	0	0	0	0	1	0	0	0	7	0	0	0	0	0	0	19
ENSMUSG00000000318	43	56	34	32	30	53	24	28	19	29	44	37	63	36	27	28	20	22	40	38	25	26	42	10	17	9	14	33	11	42	19	50	24	29	30	27	18	12	48	38	25	55	29	25	24	16	31	5	93
ENSMUSG00000000320	215	311	175	167	198	250	325	299	217	210	154	158	576	149	379	257	318	412	529	606	256	593	333	438	424	386	271	263	304	497	392	230	77	367	273	220	322	610	729	343	312	255	390	528	245	652	226	388	255
ENSMUSG00000000325	14	8	114	13	9	4	22	6	6	7	9	87	11	13	10	17	8	20	7	7	5	9	11	40	57	37	10	9	8	10	10	6	7	6	4	6	9	12	66	5	48	88	4	6	5	7	31	7	1
ENSMUSG00000000326	26	51	37	41	64	40	20	38	23	44	36	90	12	34	6	51	33	10	57	18	12	13	17	53	40	21	26	29	32	46	12	75	9	23	26	82	11	2	26	31	16	19	11	15	10	23	45	79	15
ENSMUSG00000000339	132	174	182	124	73	152	92	100	158	100	128	138	151	125	59	89	102	95	188	94	104	82	137	136	180	135	165	179	97	184	120	127	141	148	154	222	112	129	211	115	174	138	96	79	87	79	87	92	108
ENSMUSG00000000340	65	120	120	83	97	144	109	80	75	164	95	111	95	208	145	71	138	106	79	99	113	201	198	163	80	72	75	142	74	81	53	86	87	79	104	61	88	147	95	69	55	57	89	68	72	154	169	87	223
ENSMUSG00000000346	2244	3037	3031	2790	2368	2658	2393	2970	2412	2452	2811	3198	2405	2977	3016	2730	2496	3232	2722	2864	2619	3185	2205	2595	2821	2375	2515	3289	2605	2500	2200	2134	3000	2749	2233	2452	2875	2594	3139	3062	2882	2546	3121	3436	2894	4004	2750	2523	1475
ENSMUSG00000000355	23	41	5	13	55	15	29	1	20	20	22	52	21	20	6	6	6	5	17	61	9	116	106	39	5	1	24	26	101	104	3	17	11	8	23	32	31	7	3	29	47	4	81	28	34	28	34	22	22
ENSMUSG00000000359	0	0	0	0	0	0	0	0	0	0	0	0	0	0	0	0	0	0	0	0	0	0	0	0	0	0	0	0	0	0	0	0	0	0	0	0	0	0	0	0	0	0	0	0	0	0	0	0	0
ENSMUSG00000000365	215	239	287	188	263	279	275	323	320	299	296	298	302	323	203	280	223	235	315	269	248	272	301	243	176	276	204	204	179	306	210	273	207	345	287	262	224	248	161	253	121	223	262	204	200	286	266	200	88
ENSMUSG00000000374	598	732	677	641	1034	765	958	742	846	801	974	805	619	588	536	527	492	571	449	918	648	789	667	799	1175	989	875	1262	1263	927	865	811	1045	696	686	929	906	1299	906	847	1275	858	873	1172	867	832	719	691	246
ENSMUSG00000000378	5	3	4	2	5	5	22	2	3	1	0	0	4	3	26	23	1	6	14	20	10	12	12	31	2	17	7	28	2	34	0	13	0	1	1	1	14	12	0	21	0	1	13	12	1	53	2	20	92
ENSMUSG00000000381	0	0	0	0	0	0	0	0	0	0	0	0	0	0	0	0	0	0	0	0	0	0	0	0	1	0	0	0	0	0	0	0	0	0	1	0	0	0	0	0	0	0	0	0	0	0	0	0	0
ENSMUSG00000000384	20	3	10	123	73	49	56	2	56	50	30	23	52	5	7	12	19	16	12	15	19	5	5	42	80	33	39	71	75	92	9	35	38	54	45	112	9	33	33	23	79	29	19	43	9	13	21	38	110
ENSMUSG00000000385	21	98	237	57	29	2	29	78	94	51	136	74	131	4	6	137	67	44	195	89	19	141	45	70	30	17	6	41	20	3	3	16	2	29	12	114	14	6	2	75	23	0	28	34	16	9	18	39	13
ENSMUSG00000000386	23	102	135	75	6	64	56	22	51	46	116	50	5	23	13	124	239	187	13	61	6	8	143	10	79	23	34	86	24	6	4	128	17	4	26	5	64	137	44	4	47	4	19	3	72	80	117	8	22
ENSMUSG00000000392	0	0	0	0	0	0	0	0	0	0	0	0	0	0	0	0	0	0	0	0	0	0	0	0	0	1	0	0	0	0	0	0	6	0	0	0	3	0	0	0	0	0	0	0	0	0	0	0	0
ENSMUSG00000000394	0	0	0	0	0	0	0	0	0	0	0	0	0	2	0	0	0	0	0	1	0	1	4	0	0	0	0	0	0	0	0	0	0	0	0	0	0	0	0	1	0	0	0	0	0	0	0	0	0
ENSMUSG00000000399	6	78	16	40	37	44	8	143	15	31	72	135	4	115	153	46	22	59	28	57	67	51	31	109	47	45	55	197	211	63	13	77	97	27	64	122	73	55	114	117	64	73	67	72	73	118	138	55	28
ENSMUSG00000000402	1	16	5	28	10	6	1	9	4	14	8	10	7	5	2	21	3	0	6	7	3	11	6	1	1	6	6	9	6	9	0	7	3	3	2	5	0	4	1	4	7	0	0	8	6	0	5	7	10
ENSMUSG00000000409	4	5	3	5	4	10	4	5	5	4	4	4	5	5	4	3	24	7	3	3	3	3	3	4	4	5	5	4	4	4	4	4	4	4	4	4	4	3	4	4	8	4	4	4	4	5	5	8	16
ENSMUSG00000000411	0	0	0	0	0	0	0	0	0	0	0	0	0	0	0	0	0	0	0	0	0	0	1	0	0	0	0	0	0	0	0	0	0	0	0	0	0	0	0	0	0	0	0	0	0	0	0	0	0
ENSMUSG00000000416	103	183	107	140	103	96	127	131	68	112	87	105	82	148	143	106	148	131	115	119	152	128	228	173	116	103	75	101	141	107	100	90	83	104	71	93	154	171	118	100	164	161	181	115	125	139	197	233	77
ENSMUSG00000000420	283	492	709	432	587	410	507	401	371	512	430	477	467	341	357	426	536	456	374	399	391	360	128	467	303	333	317	409	329	290	267	403	431	251	320	338	217	275	160	295	374	203	377	376	325	385	463	185	40
ENSMUSG00000000435	0	0	0	0	0	0	0	0	0	0	0	0	0	0	0	0	0	0	0	0	0	0	0	0	0	0	0	0	0	0	0	0	0	0	0	0	0	0	0	0	0	0	1	0	0	0	0	1	0
ENSMUSG00000000439	240	412	275	393	307	440	399	365	462	352	485	361	220	613	566	359	412	562	308	292	359	298	314	302	407	382	387	276	416	404	460	344	385	289	354	718	483	328	252	382	297	244	335	340	306	339	362	232	908
ENSMUSG00000000440	29	36	57	49	36	68	62	44	60	75	57	51	83	82	79	86	83	72	119	96	81	51	58	50	22	35	38	26	20	42	23	44	26	60	39	47	65	25	65	69	29	29	27	29	24	59	43	52	19
ENSMUSG00000000441	4041	4047	5625	3487	3463	3752	4608	4121	3840	4711	4476	4411	4988	5602	7366	6446	5659	7200	6372	4231	3757	4001	3801	4396	4428	3147	3042	3997	3657	2427	3089	2754	2724	3214	2240	2509	3106	3291	2542	3315	3846	3718	3966	2864	3568	2798	3158	3402	2941
ENSMUSG00000000486	0	0	0	2	0	0	1	0	0	0	0	1	0	0	0	0	0	0	0	1	0	0	0	1	0	2	0	1	4	0	0	0	0	0	0	0	2	0	2	0	1	0	0	0	0	0	1	1	0
ENSMUSG00000000489	57	36	51	39	77	71	51	45	41	61	64	56	61	26	26	54	46	58	30	49	76	34	21	51	37	32	24	39	35	35	53	52	57	31	44	53	33	35	27	40	49	30	33	57	44	39	52	32	21
ENSMUSG00000000530	10	7	10	11	10	8	6	42	6	56	10	12	40	12	15	12	25	33	13	10	8	12	12	47	5	4	4	8	6	10	9	8	8	7	6	8	42	12	8	141	26	16	96	7	6	7	7	11	34
ENSMUSG00000000531	3	8	27	4	26	19	11	6	15	14	13	34	53	159	60	54	55	20	7	67	39	33	63	34	5	2	13	9	8	2	1	12	59	2	1	33	67	32	11	73	27	61	15	31	32	59	39	29	29
ENSMUSG00000000532	315	601	500	331	461	514	384	459	317	415	455	536	390	259	228	409	299	446	132	414	371	290	190	326	462	285	298	516	428	429	422	463	580	451	427	393	247	271	316	393	439	374	459	485	340	382	313	156	48
ENSMUSG00000000538	893	917	961	624	841	997	847	887	1082	650	929	696	1161	1201	1526	968	996	1083	1063	1000	1056	1494	1196	904	647	647	771	963	619	888	1094	865	729	989	697	767	795	783	1325	980	1106	1003	969	743	1385	839	847	902	717
ENSMUSG00000000544	21	17	11	21	45	16	19	42	28	26	29	27	0	1	0	4	0	1	0	0	1	0	0	0	30	17	8	31	34	17	48	22	40	31	16	26	7	1	5	0	14	16	1	6	0	2	4	5	9
ENSMUSG00000000552	68	76	58	52	50	52	50	75	62	58	25	26	57	45	74	66	44	50	52	55	79	57	89	75	128	142	92	65	148	96	107	165	110	153	101	133	174	276	110	149	176	129	216	232	109	191	154	196	26
ENSMUSG00000000555	29	88	50	23	4	44	4	4	20	4	4	25	7	8	4	8	3	42	2	3	21	11	3	3	3	24	3	73	4	5	45	3	3	4	3	4	18	3	79	7	8	8	47	22	47	4	4	16	0
ENSMUSG00000000560	0	0	0	0	0	0	0	0	0	0	0	0	0	0	9	0	0	0	0	0	0	0	0	0	0	0	0	0	0	0	0	0	0	0	0	0	0	0	0	0	0	0	0	0	0	0	0	0	0
ENSMUSG00000000561	15	17	18	17	18	15	18	18	19	19	19	20	18	20	23	78	18	17	21	19	20	21	18	19	16	18	19	17	16	18	16	18	16	19	16	19	19	16	18	20	18	21	20	18	20	20	21	19	425
ENSMUSG00000000562	0	0	0	0	0	0	0	0	0	0	0	0	0	0	0	0	0	17	0	0	0	0	0	0	0	0	0	0	0	0	0	0	0	0	0	0	0	0	0	0	0	0	0	0	0	0	0	0	0
ENSMUSG00000000563	566	454	336	242	250	517	192	399	392	326	455	501	374	344	302	402	350	266	471	329	364	464	151	313	819	366	569	396	359	677	464	416	323	465	510	212	337	448	432	534	577	414	261	261	328	311	417	344	458
ENSMUSG00000000567	0	0	0	0	0	0	0	0	0	0	0	0	0	0	0	0	0	0	0	0	0	0	0	0	0	1	0	0	0	0	0	0	0	0	1	0	0	0	0	0	0	0	0	0	0	0	0	0	0
ENSMUSG00000000568	331	190	155	219	290	202	228	220	188	351	227	265	185	181	179	241	210	173	187	249	178	190	293	209	272	186	274	265	255	322	317	232	252	243	181	232	256	239	145	258	194	207	237	208	164	196	182	153	431
ENSMUSG00000000579	0	0	0	0	0	0	0	0	0	1	0	0	0	0	0	0	0	1	1	0	0	0	0	0	0	0	0	0	0	0	0	0	0	0	0	0	0	0	0	0	0	1	0	0	0	0	0	0	0
ENSMUSG00000000581	16	20	3	22	63	46	44	0	11	8	27	56	47	43	97	51	10	36	56	81	16	66	68	40	41	30	25	19	46	32	9	21	18	4	13	61	80	9	93	55	102	57	39	49	35	58	66	106	385
ENSMUSG00000000594	20	8	1	70	17	34	3	78	26	9	10	66	6	24	6	10	53	39	9	51	12	33	24	15	3	7	16	13	61	20	6	5	79	23	12	70	27	12	27	47	68	11	17	29	5	4	5	1	397
ENSMUSG00000000600	24	39	12	21	25	13	33	26	25	24	32	37	36	16	9	15	22	41	46	17	40	23	18	16	24	41	35	25	20	27	27	11	11	9	20	19	28	26	15	32	21	9	33	6	32	15	13	11	71
ENSMUSG00000000605	17	173	237	432	211	375	159	164	67	116	321	385	123	55	22	96	73	64	40	27	53	132	4	53	164	243	203	210	154	236	460	231	194	352	368	404	3	201	343	130	107	53	84	215	115	64	118	3	50
ENSMUSG00000000606	0	0	0	0	0	2	0	0	0	0	0	0	0	0	0	0	0	0	0	0	0	0	0	0	0	0	0	0	0	0	0	0	0	0	0	0	0	0	0	0	0	0	0	0	0	0	0	2	0
ENSMUSG00000000617	1	0	0	1	0	0	0	0	0	0	0	0	1	1	0	0	2	4	0	0	0	0	0	0	0	0	0	0	0	0	0	0	0	0	0	0	0	0	0	0	0	0	0	0	0	0	0	0	0
ENSMUSG00000000627	1	2	24	2	5	0	1	1	1	0	6	0	5	2	2	0	14	18	1	5	14	0	0	8	1	9	1	7	1	2	0	0	5	0	42	0	0	0	49	3	21	0	1	0	2	1	0	15	0
ENSMUSG00000000628	4	26	18	25	26	14	8	21	3	8	19	15	5	24	5	23	24	31	23	25	11	38	17	24	21	8	17	22	24	17	14	17	6	5	10	18	11	15	12	4	16	4	14	22	22	7	18	53	12
ENSMUSG00000000631	295	298	507	330	180	358	413	345	392	451	348	294	354	418	385	340	425	383	462	549	469	260	241	458	182	461	358	397	343	408	213	585	598	475	563	539	356	335	583	589	333	355	661	629	275	641	522	449	71
ENSMUSG00000000632	0	1	1	5	0	0	0	1	0	4	1	3	4	1	0	0	0	4	6	6	19	0	12	1	8	0	0	8	3	0	2	4	0	0	0	9	0	4	8	4	0	1	10	4	0	6	6	11	20
ENSMUSG00000000682	0	0	1	0	0	1	0	0	0	1	1	1	0	0	1	1	1	1	1	1	1	1	0	1	0	0	0	0	0	0	0	1	0	0	1	1	0	0	0	1	0	0	1	0	0	0	1	1	1
ENSMUSG00000000686	0	0	0	0	0	0	0	0	0	0	0	0	0	0	0	0	0	0	0	0	0	0	0	0	0	0	0	0	0	0	0	0	0	0	0	0	0	0	0	0	0	0	0	0	0	0	0	0	0
ENSMUSG00000000690	0	0	0	0	0	0	0	0	0	0	0	3	0	0	0	0	0	0	0	0	1	0	0	0	0	0	0	0	0	0	0	0	0	0	0	0	0	0	0	0	0	0	0	0	0	0	0	0	0
ENSMUSG00000000693	0	0	0	0	0	0	0	0	0	0	0	0	0	0	0	0	0	0	0	0	0	0	0	0	0	0	4	0	0	0	0	0	0	0	0	0	0	0	0	0	0	0	0	0	0	0	0	0	0
ENSMUSG00000000701	1211	1123	1407	1516	2576	2650	2548	2701	2005	2301	1670	3561	1246	1096	1158	1004	1395	859	569	1439	1414	1208	380	818	2182	1936	1685	2975	2647	2895	2518	2110	2399	1732	1817	2370	1889	3022	1222	2071	1031	1319	1902	2075	1526	2119	1891	1434	654
ENSMUSG00000000706	1	1	0	5	0	0	1	1	1	1	1	0	1	1	13	0	3	0	16	0	4	0	0	0	0	1	1	0	2	1	0	7	0	1	1	1	0	0	1	1	14	0	11	0	0	1	1	0	0
ENSMUSG00000000708	12	10	7	13	8	17	8	9	9	57	9	10	13	14	10	8	50	14	6	48	6	8	8	17	8	7	129	9	18	10	39	7	32	8	6	72	9	8	8	7	6	12	13	7	7	9	8	16	108
ENSMUSG00000000711	9	13	41	4	13	14	22	15	1	29	17	89	18	15	9	27	19	6	5	11	4	4	36	4	8	11	24	17	7	42	2	9	2	19	1	2	2	9	37	1	20	23	10	25	22	7	8	2	37
ENSMUSG00000000724	0	0	0	0	0	0	0	0	0	0	0	0	0	0	0	1	1	0	0	10	0	0	0	0	0	0	0	0	0	0	0	0	0	0	0	0	0	0	0	0	3	0	0	0	0	0	0	1	0
ENSMUSG00000000730	514	271	636	225	385	341	289	339	311	242	342	260	1111	891	1046	869	719	1190	1070	1093	1086	1004	959	1385	220	491	434	298	339	307	341	406	537	484	577	427	612	790	775	635	487	654	640	741	827	924	811	954	842
ENSMUSG00000000731	117	201	358	373	261	147	136	229	175	96	115	93	181	212	177	216	169	237	226	223	377	213	249	275	155	118	186	154	196	144	139	201	188	218	265	192	171	207	158	142	85	180	167	208	121	263	130	124	34
ENSMUSG00000000732	257	182	131	152	161	160	189	204	237	125	146	202	148	142	221	175	184	151	184	192	143	194	182	187	209	177	150	155	214	198	265	119	77	177	63	192	190	283	258	212	284	271	218	179	219	201	181	240	141
ENSMUSG00000000738	280	273	494	729	339	486	497	573	536	667	453	622	418	590	1036	639	809	843	618	854	591	1117	894	997	597	665	654	447	413	507	457	546	565	456	554	687	589	702	856	888	611	437	1055	423	354	628	561	738	90
ENSMUSG00000000739	10	41	4	94	71	58	38	44	45	63	17	7	7	11	60	13	6	14	54	27	20	12	6	19	46	39	9	27	5	7	13	18	16	33	7	3	26	9	84	2	1	10	21	5	45	19	54	9	15
ENSMUSG00000000740	3	3	2	3	2	2	3	3	3	3	2	6	7	3	6	2	8	2	14	2	2	2	2	6	3	3	3	3	3	2	2	6	2	3	6	3	3	2	3	6	3	3	3	6	3	3	3	6	34
ENSMUSG00000000743	388	325	392	190	255	241	286	207	297	154	126	177	232	238	228	138	259	265	172	282	279	331	108	253	392	255	298	421	408	211	249	209	275	245	169	129	454	337	434	218	269	223	224	333	274	350	168	416	227
ENSMUSG00000000751	757	523	632	947	696	665	734	716	602	453	437	492	416	547	492	362	558	500	363	562	470	728	771	693	872	415	590	822	723	529	522	380	463	552	384	625	672	884	796	445	499	500	463	590	576	591	311	760	325
ENSMUSG00000000753	0	0	0	0	0	0	0	0	0	0	0	0	0	0	0	0	0	0	0	0	0	0	0	0	0	0	0	0	0	0	0	0	0	0	0	0	0	0	0	0	0	0	0	0	0	0	0	0	0
ENSMUSG00000000759	11	0	15	0	0	5	4	0	5	1	3	5	21	0	0	3	4	1	1	2	3	7	3	4	5	0	4	1	1	3	4	0	5	0	4	0	9	5	4	5	1	2	0	2	0	12	1	0	0
ENSMUSG00000000766	0	0	0	0	0	0	0	0	0	0	5	0	0	0	0	0	0	0	0	0	0	0	0	0	0	0	0	0	0	0	0	0	0	0	0	0	0	0	0	0	0	0	0	2	0	0	0	0	0
ENSMUSG00000000776	303	421	176	399	255	246	351	433	306	290	190	347	232	274	423	239	134	298	210	336	304	158	266	245	481	440	266	428	447	351	280	421	412	421	192	386	246	406	331	220	256	188	371	258	166	217	144	233	358
ENSMUSG00000000782	725	779	636	792	912	625	933	833	793	1037	666	946	885	1143	1339	829	869	1320	1123	1135	1203	998	1312	1162	889	672	578	895	967	817	662	741	781	753	595	812	1232	839	1016	705	791	912	842	754	1243	1060	856	1229	569
ENSMUSG00000000787	5436	7828	7335	6183	4533	4202	5198	5168	4449	5518	6103	5662	4813	4790	6077	6057	4324	7053	4961	6570	6502	5834	6280	5277	5815	6820	6540	6810	6413	7725	7571	6444	7194	7171	7052	5994	6505	5690	5966	6381	5382	6499	6066	7509	6395	7358	6859	5862	3771
ENSMUSG00000000791	0	0	0	0	0	0	0	0	0	0	0	0	0	0	0	0	0	1	0	0	0	0	0	12	0	0	0	0	0	0	0	0	0	0	1	0	0	0	0	0	0	0	0	0	0	0	0	1	0
ENSMUSG00000000792	0	3	0	6	1	4	2	0	5	9	1	3	8	3	0	5	4	8	9	3	6	3	10	8	7	4	11	2	7	2	10	3	1	6	0	4	9	19	0	1	1	16	11	14	21	3	1	4	0
ENSMUSG00000000794	0	0	0	0	0	0	0	0	2	0	1	0	0	1	3	0	0	0	0	1	0	0	9	0	0	0	0	0	0	0	0	0	0	0	0	1	2	0	0	0	0	0	0	0	1	0	0	0	0
ENSMUSG00000000804	541	315	484	465	460	373	600	603	537	462	404	446	502	605	405	592	482	415	641	534	483	644	791	662	459	315	404	324	422	602	246	386	383	297	396	406	481	431	400	469	522	463	631	459	410	486	383	447	185
ENSMUSG00000000805	0	3	5	0	0	0	0	0	0	0	0	0	0	5	0	0	1	0	0	0	0	0	0	0	0	0	0	7	0	0	0	0	0	0	1	7	1	0	0	0	0	0	0	1	0	0	0	2	11
ENSMUSG00000000811	28	136	163	73	16	63	72	74	65	89	83	82	122	125	145	170	85	170	169	147	119	120	69	105	48	59	53	78	15	20	64	60	109	34	77	142	125	54	145	125	67	69	99	105	51	139	80	73	94
ENSMUSG00000000817	0	0	0	8	0	0	0	0	0	0	0	0	0	0	0	0	0	0	0	0	0	0	1	0	0	0	0	0	0	0	0	0	0	0	0	0	0	0	0	0	0	0	0	0	0	0	0	0	0
ENSMUSG00000000823	239	327	227	449	546	371	378	335	393	378	416	368	239	237	223	208	338	268	179	358	226	202	261	320	486	360	409	599	436	343	510	261	405	287	179	248	218	344	332	286	373	247	308	373	358	317	160	117	32
ENSMUSG00000000826	610	646	615	658	406	537	380	533	459	522	507	547	556	542	584	744	485	420	488	831	653	715	732	621	325	472	293	444	303	312	384	530	505	723	729	908	243	360	570	721	460	570	548	603	288	666	739	453	391
ENSMUSG00000000827	2964	3366	2564	3626	3685	2663	3728	3241	3146	3182	3269	3269	2758	2731	3230	3234	3104	3379	2456	3475	2485	2790	3126	3247	3637	3099	3231	3569	3859	2686	2848	2650	3181	2900	2345	2865	2879	3362	2346	2790	3055	3001	2828	3648	3028	3348	2390	2742	406
ENSMUSG00000000838	65	70	29	37	52	22	28	41	54	38	70	52	48	28	98	59	55	39	45	44	48	58	72	45	39	39	35	53	42	127	122	68	53	53	25	25	164	87	147	88	100	126	94	114	163	194	160	99	113
ENSMUSG00000000861	0	0	0	0	0	0	0	0	0	0	0	0	0	0	0	0	1	1	0	0	0	0	0	0	0	0	0	0	0	0	0	0	0	0	0	0	0	0	0	0	0	1	0	0	0	0	0	0	0
ENSMUSG00000000869	1	0	0	0	2	0	0	0	0	0	0	0	9	0	0	2	2	1	1	3	0	0	0	4	2	0	1	0	0	2	3	0	2	0	2	0	0	1	0	0	5	3	1	0	4	5	2	2	0
ENSMUSG00000000876	167	265	579	24	253	398	457	164	518	588	216	704	742	36	700	322	376	13	99	299	67	238	252	615	205	105	251	183	267	219	178	586	712	338	591	822	539	24	31	7	77	86	160	398	75	634	186	51	16
ENSMUSG00000000881	0	12	0	0	0	0	2	0	0	0	0	0	0	0	0	0	0	0	0	0	0	0	0	0	0	0	0	0	0	0	0	0	0	0	0	0	0	0	0	0	0	1	0	0	0	1	0	0	0
ENSMUSG00000000884	273	182	101	20	167	141	101	60	83	156	158	93	205	144	141	88	30	35	149	181	76	28	101	128	185	117	145	115	90	166	76	161	133	119	38	142	56	65	110	23	132	103	75	72	42	37	102	110	167
ENSMUSG00000000889	20	11	51	14	49	16	5	7	109	86	121	79	199	22	6	31	140	105	121	45	39	17	102	77	3	4	156	57	4	7	53	5	4	6	5	6	3	76	28	20	55	59	45	16	90	70	29	79	19
ENSMUSG00000000901	2	1	15	2	1	1	1	1	1	1	1	1	2	2	10	11	9	1	1	1	1	1	1	19	1	19	1	1	3	1	1	1	1	1	1	1	1	1	1	1	1	1	1	1	1	1	1	1	15
ENSMUSG00000000902	602	390	247	462	386	468	358	316	387	322	271	270	295	344	375	331	239	483	304	305	377	350	512	377	521	423	516	365	608	301	456	274	461	362	386	349	491	719	464	385	396	466	215	342	279	303	240	491	159
ENSMUSG00000000903	0	1	1	1	0	1	0	0	0	1	1	1	1	1	1	1	1	1	1	0	1	0	0	0	0	0	0	0	1	1	0	1	0	1	1	1	0	0	0	1	0	0	0	0	0	0	1	1	16
ENSMUSG00000000915	311	294	729	82	172	228	168	102	406	304	111	235	453	315	182	356	280	353	373	211	318	111	324	212	245	424	294	292	231	273	256	163	337	266	371	783	292	404	480	280	115	267	239	346	179	208	374	140	201
ENSMUSG00000000916	436	481	226	176	332	369	334	211	220	293	220	722	196	832	1443	157	443	240	424	748	297	509	397	535	416	212	469	361	676	119	198	302	324	88	87	368	353	406	860	166	415	322	705	403	313	118	762	435	190
ENSMUSG00000000934	7	0	0	0	0	0	2	0	0	1	0	0	0	8	0	0	1	0	0	0	0	0	0	0	0	1	2	1	0	15	0	0	0	0	0	0	0	0	0	0	0	5	0	0	0	0	0	0	31
ENSMUSG00000000938	0	0	0	0	1	1	0	0	0	0	16	0	0	0	0	0	1	0	0	3	1	0	0	0	0	0	1	0	0	0	0	0	0	0	0	0	0	0	0	0	0	0	1	0	0	0	0	0	0
ENSMUSG00000000942	1	1	2	1	1	1	1	1	5	1	1	1	1	2	45	2	2	2	2	1	17	1	1	1	0	5	1	14	0	1	1	1	1	1	1	5	1	1	1	1	0	0	1	1	1	1	1	2	0
ENSMUSG00000000948	3	0	3	3	0	0	0	3	1	1	0	0	3	0	0	1	0	0	3	0	2	0	0	0	0	2	0	0	0	1	0	0	0	0	0	0	0	0	0	0	0	0	2	0	1	0	0	4	2
ENSMUSG00000000958	2	1	0	8	1	0	1	1	1	5	1	1	2	2	20	4	2	5	0	10	5	1	1	1	1	1	1	1	1	1	1	1	1	1	0	1	1	1	1	1	3	14	0	1	2	1	1	5	0
ENSMUSG00000000959	197	446	201	432	446	319	313	211	395	452	278	447	199	312	240	189	230	169	232	255	297	280	471	301	461	361	330	497	440	283	528	364	452	473	195	389	414	569	389	354	396	325	345	522	492	325	262	328	100
ENSMUSG00000000976	284	348	233	380	255	304	325	183	335	333	324	216	373	261	397	430	309	254	291	357	356	442	363	437	267	348	379	262	286	249	273	368	405	337	288	433	315	382	275	429	284	275	353	483	257	347	457	330	20
ENSMUSG00000000982	0	0	0	0	0	0	0	0	0	0	0	0	3	0	0	0	0	0	0	3	0	0	0	0	0	0	0	0	0	0	0	0	0	0	0	0	0	1	0	0	0	0	0	0	5	1	0	0	3
ENSMUSG00000000983	0	0	0	0	0	0	0	0	0	0	0	0	0	0	0	0	0	0	0	0	0	0	0	1	0	0	0	0	0	0	0	0	0	0	0	0	0	0	0	0	0	0	0	0	0	0	0	1	0
ENSMUSG00000001016	418	514	416	556	697	486	480	548	531	427	483	615	459	623	574	624	471	550	303	741	431	542	438	532	407	446	372	299	428	226	563	580	489	296	387	383	422	476	357	403	333	319	359	355	363	388	368	313	502
ENSMUSG00000001017	259	182	108	216	64	52	130	38	114	123	82	122	184	28	49	178	70	145	205	110	70	103	187	111	103	165	194	164	58	172	122	303	246	130	88	166	123	72	206	104	235	127	160	115	181	36	202	128	230
ENSMUSG00000001018	292	328	274	247	339	293	226	288	283	225	369	270	307	198	177	275	272	281	142	361	228	84	101	208	273	249	283	287	323	257	335	254	314	327	178	275	107	208	182	249	225	127	286	243	143	140	230	162	230
ENSMUSG00000001021	0	0	0	0	0	0	0	0	0	0	0	0	0	0	0	0	1	0	0	0	0	0	0	0	0	0	0	0	0	0	0	0	0	0	0	0	0	0	0	0	0	0	0	0	0	0	0	0	0
ENSMUSG00000001025	0	0	0	0	0	0	0	0	0	0	0	0	0	0	0	0	1	0	0	0	0	0	0	0	0	0	0	0	0	0	0	0	0	0	0	0	0	0	0	0	0	0	0	0	0	0	0	0	0
ENSMUSG00000001027	0	0	0	0	0	0	0	0	0	0	0	0	0	0	0	0	3	1	0	0	0	0	0	0	0	0	0	0	0	0	0	0	0	0	0	0	0	0	0	0	0	0	0	0	0	0	0	0	0
ENSMUSG00000001029	0	0	1	1	0	0	0	0	0	0	0	0	1	1	1	0	1	2	0	0	0	0	0	0	0	0	0	0	0	0	0	0	0	0	0	0	0	0	0	0	0	0	0	0	0	0	0	0	29
ENSMUSG00000001034	19	156	244	24	14	85	74	11	43	117	171	79	421	31	74	18	59	144	96	54	41	15	14	181	38	77	28	94	8	37	14	78	12	12	21	178	14	108	41	10	33	89	78	103	50	66	11	180	106
ENSMUSG00000001036	3901	6692	8392	6139	4829	5272	4954	5601	5905	6313	4824	4339	4262	5921	5357	5503	4183	6028	6373	5019	6520	4346	5026	5752	4513	6260	5557	5136	4977	4580	4210	6433	6945	7332	6735	6972	6347	6125	7042	8769	4653	5748	6151	5839	4949	7037	8634	6842	4448
ENSMUSG00000001039	570	542	377	530	618	421	648	573	496	576	636	600	448	331	379	483	524	446	321	579	412	317	493	488	717	453	537	1007	874	689	709	560	635	535	493	584	488	729	589	616	740	556	561	864	573	563	392	414	557
ENSMUSG00000001052	137	134	114	112	117	91	108	88	85	69	119	221	111	92	73	101	142	58	88	122	100	163	93	109	89	91	69	89	53	95	120	95	41	80	75	82	138	124	109	56	156	198	94	67	156	122	79	115	190
ENSMUSG00000001053	8	9	8	9	8	21	8	8	8	8	8	9	10	11	10	8	8	16	8	8	8	8	8	8	7	7	7	7	7	8	7	8	7	8	7	8	8	7	8	8	6	7	7	7	8	9	9	8	8
ENSMUSG00000001054	533	391	115	598	469	268	459	103	183	125	631	264	101	105	58	69	69	308	137	58	176	263	131	347	289	214	141	65	481	238	602	288	262	376	313	328	348	255	180	224	320	317	403	200	288	388	125	44	446
ENSMUSG00000001056	460	247	196	49	151	240	688	125	218	70	264	29	50	68	436	155	403	82	90	124	355	41	18	225	539	277	174	458	280	342	578	240	187	20	48	419	126	246	257	426	227	35	250	264	180	69	233	44	409
ENSMUSG00000001062	434	372	371	649	223	455	285	600	372	259	396	336	218	146	223	489	549	649	286	264	208	687	317	279	355	297	388	398	400	257	525	69	219	212	248	128	644	381	777	407	483	451	390	294	633	394	199	271	209
ENSMUSG00000001065	154	91	173	139	130	88	74	108	78	116	117	97	76	117	64	95	90	85	46	45	128	70	56	110	167	104	114	128	171	91	150	76	137	102	112	153	101	158	126	69	179	142	75	79	90	101	78	84	101
ENSMUSG00000001076	1	0	0	1	0	0	0	0	0	0	0	0	0	0	0	0	0	0	0	0	0	1	1	0	0	0	0	1	1	0	1	0	0	0	0	0	1	1	0	0	0	0	0	0	0	0	0	0	0
ENSMUSG00000001082	323	444	185	374	322	328	464	357	345	344	286	375	369	294	243	265	222	236	235	393	349	327	369	375	502	322	373	497	634	318	373	295	407	292	240	348	342	332	395	360	403	288	439	734	364	363	213	191	18
ENSMUSG00000001089	1378	1345	1489	1360	1983	1410	1694	1963	1865	1955	1927	2345	1127	1194	745	962	962	1386	737	1366	1104	1241	1017	1402	1454	1256	1197	2024	1717	1111	1953	1259	1573	1384	1565	1221	1076	1247	1181	1180	1250	790	1056	1291	1312	1153	1159	834	561
ENSMUSG00000001095	2	3	3	2	3	4	4	4	4	4	3	3	2	2	3	3	3	3	4	4	5	4	3	9	4	5	5	3	3	41	3	4	3	4	4	4	3	2	3	5	5	7	6	4	5	4	5	12	1
ENSMUSG00000001098	246	186	201	217	121	149	148	180	156	113	124	82	82	171	114	125	120	137	83	114	143	156	180	153	190	109	177	200	220	116	229	116	116	135	68	123	180	167	111	162	216	93	138	207	148	183	111	138	104
ENSMUSG00000001100	47	127	57	146	93	83	81	101	151	49	118	148	28	60	108	56	39	72	64	96	48	87	56	123	167	162	135	112	175	65	101	130	159	41	96	94	79	91	89	83	33	40	70	118	46	85	155	83	87
ENSMUSG00000001103	1053	1165	808	1348	885	1009	1149	1517	1083	1200	1379	1509	1407	1441	811	1103	1212	1513	1111	1169	1335	1677	1582	1820	1599	1645	1416	964	1565	991	1408	1139	1577	1189	1123	1263	2587	2596	2001	1461	2199	1477	1639	1617	1434	1449	1187	1728	1608
ENSMUSG00000001105	1494	1302	869	1112	1871	1630	1495	1567	1712	1489	1688	1773	926	1095	1349	1200	1005	892	1016	1508	1568	1531	1052	1293	1795	1833	1780	2622	1838	2231	2147	1919	3280	2310	2045	2426	2038	2052	2488	2354	1409	1406	2037	2866	1303	2753	2235	1751	127
ENSMUSG00000001120	538	139	385	422	158	317	372	189	213	196	185	85	137	443	159	255	152	259	222	66	343	451	372	335	602	434	440	512	446	573	483	302	295	217	281	281	358	432	605	405	470	309	413	248	540	357	297	329	528
ENSMUSG00000001123	5	2	16	22	1	9	9	2	2	2	2	17	2	3	2	14	9	1	1	23	12	1	1	1	9	15	1	1	1	45	1	2	1	2	12	12	20	12	1	1	22	1	5	1	28	2	2	1	30
ENSMUSG00000001127	4	20	31	104	17	24	53	103	49	73	21	13	58	6	30	30	88	42	33	81	31	20	10	5	70	30	24	68	26	35	2	50	6	2	18	2	31	53	24	18	17	6	45	32	1	64	7	51	109
ENSMUSG00000001128	0	0	0	0	0	0	0	0	0	0	0	0	0	0	0	0	3	0	0	0	0	0	0	0	1	0	0	1	1	0	0	0	0	0	0	0	0	1	0	0	1	1	0	0	0	0	0	0	3
ENSMUSG00000001131	0	0	0	0	0	1	0	0	0	0	0	0	0	0	0	0	2	0	1	1	1	1	1	1	1	0	1	0	0	0	0	0	0	0	0	0	1	1	0	0	1	1	1	1	1	0	0	2	0
ENSMUSG00000001134	2	1	4	7	2	1	6	1	1	1	19	2	6	1	5	2	2	7	10	2	6	5	2	4	3	5	3	7	10	2	2	1	1	1	1	6	12	9	11	1	4	14	1	1	10	16	1	2	9
ENSMUSG00000001138	16	20	12	21	113	65	14	34	18	76	13	13	50	28	14	11	33	19	79	40	9	9	34	12	151	14	15	11	26	211	11	106	69	14	12	14	11	7	13	13	8	9	150	42	27	145	18	11	65
ENSMUSG00000001143	37	28	163	50	25	61	137	34	118	99	49	143	9	271	97	69	32	118	35	94	73	37	27	62	47	146	55	143	69	171	87	69	38	150	183	239	100	46	40	97	67	90	53	41	49	247	130	37	171
ENSMUSG00000001150	2263	2412	1612	3313	2312	1871	2560	3070	2184	2440	2511	2560	1821	1638	1700	1879	1527	1603	1138	2352	2057	2254	2082	2217	2602	1747	1884	3676	3187	2119	2150	1542	2129	1991	1729	1832	1657	2097	2268	2075	3182	2067	1706	2279	1886	1851	1224	1277	142
ENSMUSG00000001151	1117	1460	1241	883	823	1418	910	1369	1309	1340	1277	1552	1092	1300	1378	1285	1141	1253	1358	1524	1596	1538	1751	1288	987	1124	1263	1215	963	958	1026	1090	1171	1139	976	1267	1417	1052	1450	1341	1131	976	1146	1420	874	1631	1379	1189	250
ENSMUSG00000001156	483	525	437	650	700	425	611	497	594	699	452	552	514	777	781	569	836	1043	501	722	496	548	802	903	455	314	357	501	589	239	482	374	525	443	263	329	510	684	380	446	504	506	496	668	535	509	495	608	547
ENSMUSG00000001157	528	519	596	608	550	392	520	557	530	568	638	551	766	600	641	602	511	755	661	790	491	434	389	588	310	395	338	325	431	414	395	396	417	453	426	395	261	213	356	443	289	447	540	350	528	517	404	379	87
ENSMUSG00000001158	632	608	461	682	795	645	813	862	813	960	927	954	707	519	397	554	619	438	386	727	495	513	549	599	649	628	584	690	689	714	801	884	951	786	750	861	744	686	535	644	479	460	518	711	613	696	578	524	174
ENSMUSG00000001166	822	889	1220	1350	1025	621	767	872	828	736	729	762	1133	1197	1398	968	1083	1585	2684	972	1300	1372	861	927	989	1148	1123	1136	1176	722	1355	1048	938	1063	954	859	788	1016	1119	806	836	1243	1103	999	1384	1078	950	1151	2022
ENSMUSG00000001168	730	445	434	557	443	614	568	659	650	437	564	591	571	336	385	410	433	479	393	422	398	389	354	447	927	738	1031	897	960	687	777	516	592	661	694	839	414	724	465	536	645	500	422	481	560	492	347	422	281
ENSMUSG00000001173	149	179	156	194	206	160	148	259	226	138	224	150	134	180	130	143	194	263	155	122	217	144	134	170	128	152	119	121	133	82	179	150	111	93	162	115	98	81	122	132	104	73	89	68	54	95	189	123	157
ENSMUSG00000001175	6875	6603	5726	8935	6954	6751	5570	7783	9696	9350	8626	7027	8967	7438	8876	9888	9061	5997	12717	9560	11630	8579	11036	10218	6287	11590	9772	8102	8798	10389	6709	12209	11438	10812	13380	12463	9003	6903	12289	10655	5714	7956	10329	9593	6255	10823	11776	13039	3575
ENSMUSG00000001211	41	144	329	16	165	78	66	60	341	270	138	234	167	253	30	302	114	60	137	177	56	112	110	182	160	78	147	95	165	4	199	128	190	634	303	148	114	221	98	165	68	44	43	155	45	93	272	194	52
ENSMUSG00000001225	0	17	0	1	0	1	0	0	0	0	0	0	0	0	0	0	1	1	0	7	0	14	0	0	0	0	3	1	0	0	13	0	1	0	0	0	3	0	0	0	0	0	0	0	0	0	0	0	0
ENSMUSG00000001227	0	0	1	1	1	1	3	0	0	1	1	1	1	1	1	1	6	2	1	1	1	1	1	0	0	0	2	0	0	1	0	1	0	0	0	0	0	1	0	0	0	2	0	17	2	0	0	1	0
ENSMUSG00000001228	1268	1314	1366	1601	1457	945	1192	1375	1390	1245	1166	996	1088	1406	1639	1152	1290	1507	1294	1182	1327	1378	1372	1219	1500	1538	1359	1762	1827	1065	1285	1197	2059	1865	1504	1718	1416	1431	1303	1601	1579	1440	1735	1885	1403	2032	1251	1356	589
ENSMUSG00000001229	40	29	75	73	103	36	14	51	23	32	38	15	59	121	80	90	52	47	52	66	52	67	61	53	10	15	20	9	0	7	3	40	71	2	22	56	75	14	31	59	19	26	52	64	39	23	8	18	129
ENSMUSG00000001240	9	5	4	5	6	5	19	10	8	14	8	14	0	13	8	0	9	0	19	7	0	13	15	16	12	16	16	27	17	1	22	10	0	0	2	4	11	3	5	3	3	9	9	2	15	2	0	15	0
ENSMUSG00000001247	50	61	32	38	41	51	60	60	58	41	38	36	18	27	25	26	22	29	23	32	41	26	39	47	72	49	51	92	65	42	49	62	84	74	48	65	47	46	45	63	45	57	80	80	44	51	36	32	3
ENSMUSG00000001248	0	0	0	0	0	0	0	0	0	0	0	0	0	0	4	0	2	2	0	0	1	1	0	0	0	0	0	0	0	0	0	0	0	0	0	0	4	0	0	0	0	0	0	0	4	0	0	0	0
ENSMUSG00000001249	0	0	0	0	0	3	7	0	0	0	0	0	0	0	0	1	0	2	0	0	0	0	1	0	0	0	0	0	0	0	0	0	0	0	9	0	4	0	17	0	0	0	0	0	0	0	0	0	0
ENSMUSG00000001260	0	0	0	0	0	0	0	0	0	2	0	0	0	0	0	0	0	1	0	0	0	0	0	0	0	0	0	0	0	0	0	0	0	0	0	0	0	0	0	0	0	0	0	0	0	0	0	0	0
ENSMUSG00000001270	88	182	129	130	305	141	114	51	184	92	145	143	87	135	249	82	108	34	70	61	113	35	91	138	231	246	166	114	165	99	169	91	136	2	75	205	255	359	185	61	186	226	62	206	184	116	77	189	384
ENSMUSG00000001280	193	103	285	149	236	176	180	160	218	279	333	346	373	370	310	215	436	299	351	314	289	311	331	253	54	201	233	183	199	181	92	165	184	183	252	181	117	140	139	115	187	184	149	135	192	216	201	252	259
ENSMUSG00000001281	0	0	0	0	0	0	0	0	0	0	0	0	0	0	0	0	1	1	0	0	0	0	1	0	1	0	0	0	0	0	0	0	0	0	0	0	0	1	0	0	1	1	1	1	0	0	0	0	0
ENSMUSG00000001285	2	1	2	1	2	3	6	7	14	2	2	2	1	29	3	37	3	14	9	14	3	3	3	2	1	1	1	2	1	2	90	2	2	48	1	2	2	4	2	2	2	4	2	2	39	1	1	3	63
ENSMUSG00000001288	18	20	29	163	201	47	65	18	19	17	16	16	25	28	18	14	70	12	11	78	11	41	11	30	56	95	67	414	90	87	13	92	41	412	13	225	14	32	15	15	229	11	12	52	62	196	19	14	77
ENSMUSG00000001289	413	416	305	458	629	389	727	530	580	699	639	666	345	307	403	310	399	394	460	496	397	440	509	596	895	865	931	896	986	611	713	787	684	555	661	761	679	712	756	628	434	444	417	789	541	796	549	677	250
ENSMUSG00000001300	398	142	195	279	144	196	330	152	158	290	224	156	434	300	396	267	460	337	485	144	202	212	289	229	373	285	243	152	240	337	273	140	189	323	232	141	274	139	133	142	177	358	210	148	223	179	168	198	344
ENSMUSG00000001305	102	136	82	81	159	113	125	84	205	110	94	99	126	69	93	121	173	32	68	146	128	99	73	79	196	190	135	154	114	103	122	65	125	139	168	86	175	122	130	89	221	71	67	142	61	140	19	149	107
ENSMUSG00000001313	13	12	8	14	10	139	11	11	11	11	11	11	14	710	12	10	59	17	67	9	8	264	10	124	134	10	11	11	11	11	22	10	9	10	8	10	11	10	10	10	18	40	9	10	44	12	11	136	2
ENSMUSG00000001323	10	9	48	41	35	1	15	6	25	16	5	140	15	18	5	4	22	32	59	29	27	20	81	12	34	74	90	14	62	36	107	4	57	53	8	4	17	24	4	45	22	37	44	16	3	103	5	24	27
ENSMUSG00000001333	6	7	5	7	5	3	6	6	6	6	5	5	7	8	6	5	16	20	4	4	10	5	4	5	5	6	6	5	5	5	5	5	5	6	5	6	5	4	5	5	9	5	5	5	6	6	6	11	0
ENSMUSG00000001334	11	30	8	34	10	5	8	3	19	10	16	26	10	4	40	25	5	48	0	2	43	16	10	19	17	11	7	10	1	10	12	18	8	0	11	39	16	48	1	11	38	32	17	46	19	26	19	26	0
ENSMUSG00000001348	176	187	353	54	80	152	138	151	115	199	60	98	178	252	227	308	248	284	211	171	262	198	75	327	151	77	71	117	99	162	140	82	154	474	69	195	144	130	240	190	248	101	86	164	271	76	262	179	38
ENSMUSG00000001349	89	226	335	256	293	228	103	245	306	151	203	171	503	304	483	482	579	578	162	519	413	255	278	247	238	321	216	213	406	334	484	326	343	429	234	247	260	233	118	180	189	210	369	393	351	240	161	453	310
ENSMUSG00000001366	285	240	170	278	231	217	241	242	248	212	317	286	195	153	167	155	183	174	183	249	197	184	219	232	212	218	170	213	259	219	205	138	179	190	168	176	146	225	176	162	250	180	182	246	222	222	150	194	49
ENSMUSG00000001376	326	316	488	384	342	325	397	458	453	411	372	436	428	562	673	502	587	664	847	424	490	480	484	510	363	314	310	273	239	284	245	362	322	257	280	307	446	282	374	366	298	352	437	292	343	540	376	429	304
ENSMUSG00000001380	1007	1038	831	1561	1082	982	981	943	699	637	923	859	664	1159	1028	629	639	773	798	904	1019	1307	902	847	892	730	845	1117	1077	1055	1010	630	1087	966	752	875	794	914	666	834	611	817	547	625	503	943	537	587	34
ENSMUSG00000001383	204	119	125	167	177	150	257	256	223	301	358	220	134	80	76	120	79	100	93	226	185	176	253	278	228	320	256	286	330	347	224	389	413	333	450	428	305	291	339	432	190	208	417	404	175	400	430	450	52
ENSMUSG00000001403	100	76	106	37	81	88	57	37	61	124	160	160	390	287	236	159	160	159	200	282	303	170	83	211	29	48	2	47	17	33	49	50	59	93	91	109	53	37	113	67	109	195	86	74	158	110	155	106	1882
ENSMUSG00000001415	146	10	102	136	102	65	28	70	205	14	198	40	15	16	6	132	11	8	22	35	21	153	5	11	188	97	83	162	16	130	66	54	91	102	24	6	165	6	225	128	123	27	91	55	10	31	33	55	133
ENSMUSG00000001416	1128	781	896	759	464	798	661	855	848	659	834	1423	753	530	710	501	519	570	746	468	586	834	626	787	1241	775	1176	1118	924	837	1195	776	961	653	730	1138	1219	828	764	544	1233	1219	831	603	792	708	489	875	821
ENSMUSG00000001418	6	3	1	22	7	8	34	2	8	1	6	1	3	102	1	24	33	15	39	4	10	29	56	3	24	44	2	2	2	71	4	1	1	53	1	1	52	11	1	1	14	20	15	3	1	2	2	30	20
ENSMUSG00000001419	55	64	56	50	71	16	41	72	55	39	37	89	57	54	180	63	71	79	59	77	93	74	93	29	51	46	69	70	16	48	26	100	24	56	66	56	87	88	89	89	97	181	167	94	102	120	65	64	64
ENSMUSG00000001420	23	16	29	23	17	10	13	13	39	15	18	20	22	27	23	18	54	45	16	16	49	19	19	15	11	9	41	16	13	19	18	13	14	14	10	45	18	20	15	118	10	8	10	53	11	14	13	16	58
ENSMUSG00000001424	103	79	72	117	85	145	38	59	62	79	56	74	65	51	62	65	63	52	9	48	62	81	72	38	111	84	65	58	89	47	126	91	61	86	85	83	82	90	78	52	143	74	57	90	82	52	52	59	214
ENSMUSG00000001435	0	0	0	2	0	0	0	0	0	0	0	7	0	0	0	5	0	0	0	11	2	0	0	10	0	0	0	0	0	0	0	0	0	0	0	0	3	13	0	0	7	0	0	0	0	4	0	0	0
ENSMUSG00000001436	15	59	39	35	26	44	21	38	24	31	22	29	36	24	24	36	20	38	14	48	55	26	15	41	12	11	1	30	3	26	15	39	42	31	40	57	9	14	14	46	15	41	44	54	8	16	39	8	6
ENSMUSG00000001440	590	470	589	538	762	536	661	583	548	536	644	619	756	955	768	587	786	674	661	805	647	849	813	873	549	526	480	820	589	587	488	450	607	380	353	591	476	602	559	573	693	504	525	726	605	582	499	634	905
ENSMUSG00000001441	101	165	261	141	211	138	128	111	238	164	157	118	148	128	102	65	162	101	130	82	180	55	89	198	157	119	139	150	136	190	193	235	69	96	284	190	81	158	58	148	138	115	137	164	185	105	155	171	45
ENSMUSG00000001444	0	0	0	0	0	0	0	0	0	0	0	0	0	0	0	0	0	0	0	0	0	0	0	0	0	0	0	0	0	0	0	0	0	0	0	0	0	0	0	0	0	0	0	0	0	0	0	0	0
ENSMUSG00000001445	157	193	264	178	227	170	264	244	140	225	170	278	253	332	280	245	306	385	269	232	216	151	168	251	157	93	95	134	147	68	154	106	129	166	70	147	152	137	88	115	137	167	158	129	207	129	167	148	125
ENSMUSG00000001467	89	17	77	70	59	67	40	35	61	57	17	38	17	43	9	56	26	85	13	37	27	9	71	9	60	14	57	45	33	66	36	10	98	83	21	114	58	21	104	138	24	29	63	30	69	79	2	4	5
ENSMUSG00000001472	196	217	172	59	120	121	176	120	164	264	89	119	115	157	188	187	139	51	193	136	155	215	221	164	147	184	137	110	210	214	141	324	237	280	233	348	63	188	192	279	110	160	256	239	128	375	268	350	1053
ENSMUSG00000001473	1004	1794	901	830	451	1331	628	586	500	569	723	461	707	1448	720	1559	1098	928	1082	642	1032	983	677	808	1898	552	1014	929	1064	849	942	557	390	428	609	581	811	864	1443	1348	1814	770	691	659	723	828	563	1099	513
ENSMUSG00000001482	94	5	25	5	1	5	2	3	4	2	1	1	7	7	1	8	2	31	5	2	22	20	7	33	6	3	3	2	3	2	51	12	50	29	1	2	3	11	6	1	15	60	7	4	12	3	3	10	31
ENSMUSG00000001493	0	0	0	0	0	0	0	0	2	3	0	1	0	0	0	9	0	0	0	0	0	0	0	0	0	0	0	0	0	2	0	0	0	0	0	0	0	0	0	0	0	0	1	2	0	0	0	4	0
ENSMUSG00000001494	5	86	1	8	71	16	17	44	24	12	62	12	50	2	13	4	19	27	15	36	16	41	52	12	36	32	29	22	32	25	30	44	14	12	3	1	40	64	37	17	36	12	12	38	9	57	27	36	5
ENSMUSG00000001497	0	0	0	9	2	0	0	8	8	0	0	0	0	0	0	1	0	1	0	1	3	4	0	6	0	0	0	0	0	1	2	4	1	0	1	0	2	4	4	0	1	6	1	0	2	2	3	1	0
ENSMUSG00000001504	0	0	0	0	0	0	0	0	0	0	0	8	2	6	0	31	3	0	29	5	2	22	0	1	0	4	0	0	0	0	0	5	0	0	0	0	2	0	0	0	0	8	1	16	4	0	17	1	0
ENSMUSG00000001506	0	0	0	0	1	0	0	3	0	0	3	1	5	0	0	5	7	0	0	1	1	13	0	1	0	0	0	0	0	0	0	0	0	0	0	13	0	0	0	6	0	0	1	2	0	0	0	0	0
ENSMUSG00000001507	0	0	0	0	0	0	0	0	0	0	0	0	0	0	0	0	1	0	0	0	1	0	0	0	0	0	0	2	0	0	0	0	0	0	0	0	0	0	0	0	0	0	0	0	0	0	0	0	0
ENSMUSG00000001508	51	4	7	6	6	27	3	26	3	5	6	7	12	7	9	7	8	7	17	6	5	7	6	11	2	2	2	4	3	6	5	5	5	103	4	5	5	7	5	4	7	9	32	4	30	4	4	6	5
ENSMUSG00000001510	0	0	0	0	0	0	0	0	0	0	0	0	0	0	0	0	2	0	0	0	0	0	0	0	0	0	0	0	0	0	0	0	0	0	0	0	0	0	0	0	1	0	0	0	0	0	0	0	0
ENSMUSG00000001517	734	453	650	758	487	613	613	589	511	401	345	324	540	667	1248	594	1072	956	939	663	788	1147	662	939	762	655	692	541	757	554	692	476	369	674	380	508	724	1320	553	350	836	750	564	829	1065	743	690	764	860
ENSMUSG00000001518	1	0	0	0	0	1	0	0	0	0	0	0	0	0	7	0	7	0	0	0	2	13	0	0	0	0	0	0	0	0	0	0	0	0	2	0	0	1	20	18	6	1	4	0	0	0	0	0	2
ENSMUSG00000001520	0	0	0	0	0	2	0	0	0	0	0	0	0	0	0	0	1	3	0	0	0	0	0	0	0	0	0	0	0	0	0	0	0	0	0	0	0	0	0	0	0	0	0	0	0	0	0	0	0
ENSMUSG00000001521	531	302	423	635	804	361	537	270	376	537	466	367	389	406	498	464	877	683	372	740	236	272	315	605	534	608	408	447	765	319	514	407	493	236	362	348	306	539	114	265	446	257	368	478	419	327	344	225	438
ENSMUSG00000001524	69	105	250	29	177	163	226	544	100	99	245	116	343	304	184	325	126	150	73	179	219	63	162	327	125	64	167	418	139	48	277	66	43	150	71	274	83	178	87	204	59	41	27	179	57	214	18	38	72
ENSMUSG00000001525	107	166	202	353	228	270	228	162	220	197	199	231	274	365	535	389	228	280	421	360	331	219	361	260	197	86	183	296	129	201	55	193	122	243	170	135	420	277	387	338	314	288	253	228	215	293	224	380	338
ENSMUSG00000001542	167	50	172	88	123	73	235	147	58	141	7	61	397	64	282	246	303	156	265	306	165	443	326	212	103	272	267	72	93	100	134	185	149	42	165	451	289	90	184	154	37	126	101	128	58	197	252	424	2267
ENSMUSG00000001552	35	15	41	107	47	46	7	8	8	28	16	67	35	98	61	80	42	63	18	36	43	72	70	39	64	26	6	41	10	24	11	52	3	21	3	30	6	11	54	56	76	74	57	23	41	34	10	25	58
ENSMUSG00000001555	1	0	0	0	1	1	1	0	0	1	1	1	0	0	1	1	1	2	1	1	1	1	1	1	1	1	1	1	1	1	1	1	1	1	0	1	1	1	1	1	1	1	1	1	1	1	0	1	0
ENSMUSG00000001558	1	1	2	51	1	2	1	1	1	1	1	1	1	1	1	1	1	2	2	1	2	1	1	1	1	1	2	1	1	1	1	1	1	1	2	1	1	1	1	2	1	2	2	1	2	1	2	4	10
ENSMUSG00000001566	0	0	1	0	0	0	0	0	0	0	0	0	0	0	1	0	2	1	1	0	0	0	0	0	0	0	0	0	0	0	0	0	0	0	0	0	0	0	0	0	0	0	0	0	0	0	0	0	0
ENSMUSG00000001569	158	149	137	69	51	101	43	127	28	123	144	155	43	220	8	77	56	128	43	88	113	74	93	63	55	55	118	71	52	86	67	69	90	119	35	59	138	66	46	116	123	49	77	39	147	37	154	36	101
ENSMUSG00000001576	45	35	8	60	51	31	50	32	32	29	50	48	32	19	11	33	82	23	18	8	39	84	46	52	22	28	41	43	35	32	68	37	70	27	45	22	44	40	78	91	25	86	58	84	88	54	12	60	150
ENSMUSG00000001583	0	0	1	0	0	0	0	0	0	0	0	0	0	0	1	1	2	2	1	0	0	0	0	0	0	0	0	0	0	0	0	0	0	0	0	0	0	0	0	0	0	0	0	0	0	0	0	0	1
ENSMUSG00000001588	1	0	0	1	0	2	0	0	0	0	0	0	1	1	0	0	0	1	0	0	0	0	0	0	0	0	0	0	0	0	0	0	0	0	0	0	0	0	0	0	0	2	0	0	0	0	0	3	0
ENSMUSG00000001604	111	162	143	65	72	110	77	130	81	160	76	55	84	151	184	234	111	138	251	103	162	151	69	184	70	116	124	88	62	151	94	210	173	254	185	168	66	73	110	241	67	73	141	155	66	201	187	134	215
ENSMUSG00000001622	0	0	0	0	0	2	0	0	0	0	0	0	0	0	0	0	2	0	0	0	0	0	0	1	0	0	0	0	0	0	0	0	0	0	0	0	0	0	0	0	0	0	0	0	0	0	0	1	0
ENSMUSG00000001627	3613	3632	2443	4814	4043	2763	4160	4313	3714	3567	4064	4560	4019	3232	3226	3445	3902	3092	3916	4337	3171	3229	4019	4028	4712	5255	4231	5085	5467	4188	4010	4019	4196	3709	3756	3410	5214	4342	2968	3336	3973	3490	4860	5481	3918	4945	3475	4686	1435
ENSMUSG00000001630	316	277	188	378	289	243	253	238	223	306	400	327	250	207	195	156	280	241	174	286	185	317	260	324	416	250	230	347	442	305	243	180	224	243	159	154	169	275	205	235	267	245	265	335	209	252	175	208	32
ENSMUSG00000001632	73	108	140	138	90	89	50	91	66	81	61	48	63	100	106	84	53	138	91	80	117	87	51	72	38	69	58	58	34	80	102	118	94	140	122	58	86	52	83	86	44	85	220	152	73	131	161	63	467
ENSMUSG00000001642	215	176	77	178	219	168	175	199	157	166	164	220	126	177	122	104	137	117	129	134	147	122	167	146	192	150	160	259	245	195	233	203	251	190	205	152	266	297	205	160	300	259	173	182	286	172	108	180	176
ENSMUSG00000001655	2	28	10	21	2	1	19	1	1	1	2	25	57	2	2	21	5	30	73	1	16	13	11	1	1	14	15	1	9	2	2	35	13	30	33	24	30	2	6	1	1	22	6	1	12	25	17	14	13
ENSMUSG00000001656	1	1	1	1	1	1	6	1	1	1	1	1	1	1	1	1	4	1	1	1	1	3	1	1	1	1	1	1	1	1	1	1	1	1	1	1	1	1	1	1	1	1	1	8	1	25	1	1	0
ENSMUSG00000001661	0	0	0	0	0	0	0	0	0	0	0	0	0	0	0	0	0	0	1	0	0	0	0	0	0	1	0	0	0	0	0	0	0	0	0	0	0	0	0	0	0	0	0	1	0	0	0	0	0
ENSMUSG00000001663	0	0	0	0	0	0	0	0	0	0	0	0	0	0	0	0	4	0	0	0	0	0	0	0	0	0	0	0	0	0	0	0	0	0	0	0	0	0	0	0	0	0	0	0	0	0	0	0	0
ENSMUSG00000001665	19	4	0	0	0	0	0	1	0	9	0	3	0	0	0	0	3	2	0	0	0	0	0	2	0	0	0	0	0	0	0	5	0	0	6	0	0	1	0	0	0	9	1	1	22	3	0	17	0
ENSMUSG00000001666	11	35	8	56	31	43	40	39	5	38	44	30	67	53	49	9	30	91	22	48	25	55	29	33	34	7	27	18	36	20	31	13	27	41	11	36	29	54	6	5	16	44	15	24	21	65	6	16	20
ENSMUSG00000001670	1	0	0	1	0	0	0	1	0	0	0	1	0	0	0	2	0	2	0	0	1	0	0	1	0	0	0	0	0	0	0	0	0	0	0	0	0	1	0	0	0	0	1	0	0	0	0	0	0
ENSMUSG00000001672	0	0	0	2	0	0	1	0	0	0	0	0	1	0	0	0	1	0	0	1	1	0	0	0	0	0	2	0	0	3	0	0	1	0	0	0	0	0	0	0	1	0	0	2	0	4	0	5	0
ENSMUSG00000001674	622	411	229	419	1011	514	800	665	698	1017	1008	805	422	299	412	397	427	288	326	776	781	609	649	848	1176	1106	908	1394	1505	1212	1306	1440	1516	1302	1035	1405	1370	1456	1316	1315	1064	1035	1360	1761	808	1544	1284	1240	150
ENSMUSG00000001687	607	1097	1349	649	797	852	1071	658	881	920	986	1184	877	1167	1182	869	1006	1309	1383	881	895	846	540	1223	520	724	557	385	509	584	509	823	590	797	738	698	684	494	599	763	275	520	489	453	602	780	1012	726	1090
ENSMUSG00000001700	6	7	2	3	30	0	2	2	9	2	25	49	4	5	2	1	1	19	15	35	12	1	13	18	9	4	2	21	92	2	24	2	1	2	2	13	3	3	2	2	14	0	1	1	1	18	6	1	0
ENSMUSG00000001707	31	45	32	19	51	47	32	37	38	63	70	76	77	39	40	30	46	46	47	62	93	43	54	32	18	18	55	22	18	40	41	41	46	42	37	41	49	32	45	49	20	38	42	35	36	63	19	40	176
ENSMUSG00000001729	3590	4316	4074	3729	5397	3979	5398	5324	4842	4698	4415	3796	3548	3186	3497	3341	3346	4034	2682	4569	3784	3448	3386	4324	5176	4249	4503	5666	5509	3880	6013	5192	5554	4714	3236	4167	3994	5447	4414	4187	5702	3635	3629	4635	4277	3995	3022	3009	650
ENSMUSG00000001739	20	54	62	26	36	20	30	54	66	57	25	27	70	137	68	124	134	102	73	57	79	117	215	86	22	51	82	62	34	37	50	31	105	32	46	62	102	101	88	40	172	45	76	70	79	141	43	99	60
ENSMUSG00000001741	0	0	0	0	0	0	0	0	0	0	0	0	0	1	0	0	0	7	0	0	0	0	0	0	0	0	0	0	0	0	0	0	0	0	0	0	0	0	0	0	0	0	3	0	0	2	2	0	0
ENSMUSG00000001750	7	5	5	7	6	5	5	5	5	6	6	7	6	7	8	7	6	12	7	6	5	7	7	6	5	4	4	6	5	6	6	5	5	5	4	5	7	7	6	5	5	4	5	5	5	5	5	6	60
ENSMUSG00000001751	7	3	4	14	0	20	15	3	10	11	3	6	8	0	5	12	4	1	3	0	27	16	6	7	4	9	0	38	31	22	2	15	12	17	3	16	3	0	4	10	34	2	6	4	14	10	5	10	1
ENSMUSG00000001755	101	107	121	167	111	61	104	184	111	89	160	84	78	149	74	95	84	128	127	84	93	193	92	120	129	133	101	165	188	91	111	68	88	76	114	114	120	98	126	77	111	71	97	119	102	93	65	47	40
ENSMUSG00000001761	0	1	0	0	0	0	0	0	0	0	0	0	0	0	0	1	1	1	0	0	0	0	0	0	0	1	0	0	0	0	0	0	0	0	0	0	1	0	0	0	0	0	0	1	5	0	0	0	0
ENSMUSG00000001763	65	127	58	79	166	143	138	147	129	61	144	58	110	56	153	12	90	51	76	86	55	32	57	94	137	125	95	201	146	68	193	128	190	125	102	135	106	158	66	55	85	84	81	145	92	107	55	102	87
ENSMUSG00000001767	1243	641	468	1107	820	569	904	823	508	913	814	991	491	800	818	885	870	716	1237	1200	629	1331	1402	1250	1305	1175	802	1236	840	1335	459	880	855	1292	1556	372	1506	773	1010	887	1059	645	899	946	662	1321	735	660	653
ENSMUSG00000001768	1	0	22	6	2	16	12	7	9	1	4	106	42	82	4	3	13	25	4	5	1	43	4	21	9	2	2	1	6	2	21	25	11	0	6	0	4	17	1	0	20	3	26	35	15	18	6	14	12
ENSMUSG00000001773	0	0	0	0	0	2	0	0	7	7	0	0	0	0	0	0	0	0	0	0	0	0	0	0	0	0	0	0	0	0	0	0	0	0	1	0	0	0	0	0	0	0	0	0	0	0	0	0	0
ENSMUSG00000001774	106	76	95	143	110	125	114	102	95	102	80	104	102	85	144	67	86	90	133	108	86	91	84	99	120	118	147	101	84	110	115	68	60	85	87	59	91	90	130	99	124	136	118	75	152	101	100	96	24
ENSMUSG00000001783	32	36	42	109	84	44	65	49	35	61	29	54	14	28	49	3	38	31	50	18	29	11	29	42	110	63	67	133	134	48	127	56	14	69	50	18	73	116	94	40	59	37	37	55	47	49	45	30	49
ENSMUSG00000001785	167	200	34	217	126	195	102	59	66	20	168	140	15	138	245	123	36	118	28	131	34	17	192	256	136	109	93	135	78	285	12	60	267	145	211	33	147	72	243	164	156	268	129	139	116	90	239	338	210
ENSMUSG00000001786	91	65	108	121	76	126	92	80	99	88	99	76	106	40	53	52	76	75	64	75	77	68	56	65	122	99	98	105	97	90	85	84	95	47	61	90	82	56	72	53	93	78	76	81	110	81	33	114	42
ENSMUSG00000001794	187	35	88	34	151	93	67	40	66	62	88	74	157	392	158	76	100	223	189	125	132	269	257	99	95	38	53	133	88	49	48	139	89	106	85	106	191	7	169	107	118	91	69	184	97	54	116	45	189
ENSMUSG00000001804	0	0	0	0	0	0	0	0	0	0	0	0	0	0	0	0	1	0	0	0	0	0	0	0	0	0	0	0	0	0	0	0	0	0	0	0	0	0	0	0	0	0	0	0	0	0	0	0	0
ENSMUSG00000001815	4	0	0	0	0	0	0	0	0	0	2	0	1	0	0	0	3	17	0	0	0	0	1	0	0	0	0	1	1	0	2	3	3	0	0	0	0	0	0	0	0	3	1	0	2	0	0	0	0
ENSMUSG00000001819	0	0	2	1	2	0	1	1	2	0	0	1	3	0	1	0	1	2	1	1	1	0	1	1	0	0	0	0	0	0	0	2	1	0	1	1	0	0	1	0	1	0	1	1	1	0	0	1	4
ENSMUSG00000001823	1	2	2	1	1	1	1	2	2	1	1	1	2	2	2	21	2	2	1	10	6	5	2	1	1	3	1	1	1	1	1	2	1	2	2	2	1	0	1	2	1	1	1	1	1	2	2	1	0
ENSMUSG00000001827	12	15	12	14	13	32	14	15	16	14	14	14	15	16	15	12	37	36	13	13	13	14	12	14	13	15	16	13	13	13	12	13	12	14	13	14	14	10	13	15	27	16	15	13	16	151	17	222	671
ENSMUSG00000001829	186	70	40	39	61	53	27	42	48	57	28	65	12	52	84	17	11	104	50	43	49	53	13	17	8	28	61	43	47	19	28	38	44	65	57	62	42	14	60	54	38	36	39	63	61	58	79	65	123
ENSMUSG00000001833	174	134	221	151	120	89	129	168	171	153	155	140	195	250	250	291	225	290	497	203	257	200	229	170	122	176	176	135	128	168	115	216	226	198	232	319	203	78	264	241	113	236	232	228	96	197	258	208	120
ENSMUSG00000001844	2	3	8	18	0	5	12	2	3	1	12	0	4	63	1	27	16	21	51	30	36	21	17	22	26	3	3	0	2	0	8	7	2	1	11	1	38	9	0	2	2	2	0	1	1	2	61	22	90
ENSMUSG00000001847	2506	3196	2612	2875	2897	2311	2522	2731	2504	2793	3216	2823	2462	1930	2533	2424	2850	2516	2647	2210	1949	2161	1612	2163	2842	3047	2698	3321	3164	2958	2521	2724	2797	2405	2814	2386	2067	1860	1823	2357	2761	1948	2319	2162	2289	1862	1692	2085	1151
ENSMUSG00000001855	1058	1004	1119	1480	1180	1286	980	817	912	809	821	835	1033	1654	1283	1165	1034	1433	1205	1069	1122	1274	1290	1407	1281	1084	1179	1301	1348	760	1284	823	1125	1063	815	1106	1178	1847	1022	1041	1468	1355	1212	1315	1658	1295	957	1181	1461
ENSMUSG00000001864	3	3	3	3	4	3	3	3	3	3	3	4	3	3	4	4	4	4	4	4	4	4	4	4	3	3	3	3	3	3	3	3	3	3	3	3	4	4	3	4	4	4	4	3	4	3	4	4	0
ENSMUSG00000001865	2	0	0	1	0	0	0	0	0	0	0	0	0	0	0	0	0	0	0	0	0	0	0	0	0	0	0	1	0	0	0	0	1	3	0	0	0	0	0	0	0	1	0	0	0	0	0	0	0
ENSMUSG00000001870	0	0	0	0	0	0	0	0	0	0	0	0	13	0	0	0	19	0	8	0	0	0	0	10	2	0	0	0	0	0	0	7	0	0	0	0	0	4	0	0	0	2	3	3	0	1	0	1	0
ENSMUSG00000001891	59	106	84	122	118	70	123	89	102	89	112	150	108	140	53	106	157	94	156	94	71	151	125	82	72	55	101	47	81	51	81	87	76	75	84	56	60	63	40	60	80	49	41	73	118	62	104	136	100
ENSMUSG00000001901	0	0	0	0	0	0	0	0	0	0	0	0	0	0	0	0	0	0	0	0	0	0	0	0	0	0	0	0	0	0	0	0	0	0	0	0	7	0	0	0	0	0	0	1	0	0	0	8	8
ENSMUSG00000001909	173	7	310	295	216	400	447	347	311	124	555	537	636	203	288	373	225	230	181	325	271	39	150	370	320	163	213	303	201	7	89	140	136	108	83	218	618	678	715	270	215	328	363	163	228	273	266	80	1
ENSMUSG00000001910	67	126	74	68	80	72	112	76	75	79	35	66	34	125	31	90	38	36	74	90	58	60	45	89	87	100	41	128	53	82	195	157	32	95	68	131	100	157	70	82	126	102	121	73	66	73	34	19	113
ENSMUSG00000001911	498	160	299	337	662	719	402	383	354	447	346	259	286	278	247	282	202	502	274	376	542	301	113	362	279	444	230	257	496	388	850	525	512	694	490	371	189	521	336	701	294	253	395	411	210	144	515	171	15
ENSMUSG00000001918	4	6	6	6	4	4	5	6	6	6	5	30	6	7	6	23	5	5	17	50	5	5	127	11	4	6	6	4	4	5	4	6	5	6	6	6	5	3	5	6	4	5	5	4	6	6	7	5	140
ENSMUSG00000001924	3893	2871	1817	2889	2284	3412	2734	2818	2354	2488	2170	3154	1721	1903	1518	1562	1666	1766	1024	1852	2433	2487	3080	2398	4507	2964	3714	4660	3970	3346	3995	2676	2730	3328	2816	2947	3973	5078	3758	3024	4492	3287	2849	3317	3717	3109	2425	3335	483
ENSMUSG00000001930	0	0	0	0	0	0	0	0	0	0	0	0	0	0	0	0	2	0	0	0	0	0	0	0	0	0	0	0	9	0	0	0	0	0	0	0	0	0	11	0	0	0	0	2	9	0	0	0	0
ENSMUSG00000001942	129	92	252	111	129	118	66	82	97	85	65	34	75	85	173	143	52	119	60	127	172	107	68	99	120	87	81	84	83	71	131	136	174	158	151	143	84	41	71	175	68	49	92	150	78	184	130	55	60
ENSMUSG00000001943	0	0	0	0	0	0	0	0	0	0	0	0	0	0	0	0	0	0	0	0	0	0	0	0	0	0	0	0	0	0	0	0	0	0	0	0	0	0	0	0	0	0	0	0	0	0	0	0	0
ENSMUSG00000001946	0	0	0	0	0	0	0	0	0	0	0	1	0	0	0	0	1	1	0	0	0	0	0	0	0	0	0	0	0	0	0	0	0	0	0	20	0	0	0	0	0	1	0	0	0	0	0	1	0
ENSMUSG00000001948	0	0	0	0	0	0	3	0	0	0	0	0	0	3	0	0	1	1	0	0	3	0	0	0	0	4	2	0	0	0	0	0	2	2	0	2	0	4	0	4	1	5	0	1	1	16	0	1	0
ENSMUSG00000001962	52	54	19	47	12	41	32	23	23	6	58	43	37	18	29	48	18	28	44	26	53	34	17	16	50	40	44	52	24	22	11	25	40	76	27	60	45	35	39	22	32	36	46	40	11	38	21	25	81
ENSMUSG00000001964	43	32	16	46	114	56	59	72	64	118	52	88	68	70	107	99	89	34	40	102	89	77	99	104	112	109	135	108	173	115	137	114	67	101	58	78	102	135	134	134	86	69	74	106	144	102	119	111	133
ENSMUSG00000001983	164	6	36	8	5	9	5	5	5	5	5	5	8	8	4	4	16	2	2	4	3	10	5	5	6	5	5	7	7	6	6	9	4	4	19	4	5	6	5	33	4	56	3	5	5	5	4	3	6
ENSMUSG00000001985	1	2	0	2	0	3	1	1	1	4	0	7	2	2	0	3	0	0	8	3	4	7	22	0	1	1	1	0	1	1	0	0	0	1	3	1	12	0	0	4	0	0	7	0	0	1	1	1	0
ENSMUSG00000001986	0	0	0	0	0	2	0	0	0	0	0	0	0	0	0	0	0	0	0	0	0	0	0	0	0	0	0	0	0	0	0	0	0	0	0	0	0	0	0	0	0	0	0	0	0	0	0	1	0
ENSMUSG00000001988	5	4	3	5	4	19	4	4	4	4	4	5	5	6	5	4	4	8	4	4	3	4	5	4	4	4	4	5	4	5	5	4	4	4	3	4	5	5	4	4	4	3	3	4	4	4	4	4	10
ENSMUSG00000001995	509	607	557	609	623	531	915	515	529	461	692	536	361	443	553	315	441	623	302	390	415	398	322	487	751	257	484	550	492	465	637	431	591	577	346	499	448	396	338	319	382	432	354	483	380	334	307	400	194
ENSMUSG00000001998	12	2	52	113	65	28	50	51	26	62	48	83	53	14	38	36	48	42	33	44	47	52	3	42	29	43	34	38	57	35	23	40	41	45	56	68	27	25	58	58	38	16	39	47	86	79	42	33	143
ENSMUSG00000001999	285	197	100	307	260	128	431	133	169	183	186	238	205	157	208	156	218	164	123	232	183	105	223	223	196	130	127	268	274	90	190	97	144	155	66	129	126	208	43	49	103	85	163	208	93	171	118	88	8
ENSMUSG00000002006	1	1	2	1	1	1	1	1	1	1	1	1	1	1	2	1	1	1	2	1	1	1	1	1	1	1	1	1	1	1	1	1	1	1	4	1	1	1	1	1	1	1	1	1	1	1	1	1	34
ENSMUSG00000002007	0	6	0	0	0	0	4	9	0	3	0	0	0	10	0	0	2	0	0	4	4	10	24	2	0	1	0	0	2	3	0	0	6	0	22	3	4	20	18	2	0	8	2	21	17	2	7	50	1
ENSMUSG00000002010	77	11	57	17	245	38	232	160	106	140	8	82	17	19	8	155	147	57	51	6	7	205	17	111	289	37	85	42	50	207	77	216	50	44	4	97	148	9	341	23	4	42	92	128	83	199	62	132	214
ENSMUSG00000002012	0	0	0	0	0	0	0	0	0	0	0	0	0	0	0	0	0	0	0	0	0	0	0	0	0	0	0	0	0	0	0	0	0	0	0	0	0	0	0	0	0	0	0	0	0	0	0	0	3
ENSMUSG00000002014	67	27	2	91	10	12	5	60	51	14	7	29	2	3	32	5	20	16	50	12	55	1	3	37	48	55	28	59	92	51	60	52	32	1	86	63	39	50	57	12	9	57	1	1	11	44	75	46	35
ENSMUSG00000002015	794	565	333	656	814	461	787	641	677	778	805	614	342	323	193	326	440	286	166	515	338	465	432	426	674	590	547	731	812	478	776	860	817	646	627	790	564	587	279	416	477	282	420	701	433	452	468	378	491
ENSMUSG00000002017	287	172	171	132	155	98	53	186	208	145	111	224	116	9	158	111	122	56	50	142	75	61	56	110	113	141	120	120	120	78	5	180	90	91	148	192	131	73	40	103	49	51	33	170	16	144	122	200	173
ENSMUSG00000002020	8	91	495	9	464	9	65	40	65	101	55	15	125	181	29	22	320	20	27	129	83	331	18	121	48	74	73	91	36	23	86	6	78	159	8	5	130	561	6	51	98	50	39	28	64	72	70	77	172
ENSMUSG00000002028	50	35	29	16	15	9	21	9	17	22	4	32	5	70	58	35	40	39	49	36	34	0	3	9	29	27	33	5	10	10	9	29	36	14	76	29	5	16	51	23	50	9	29	14	21	6	27	62	8
ENSMUSG00000002031	55	90	271	22	157	57	116	49	65	25	174	144	449	111	63	270	55	8	563	127	51	82	51	111	67	89	12	10	46	189	212	33	133	2	68	81	139	16	78	223	219	167	223	183	158	130	90	59	354
ENSMUSG00000002032	0	0	0	0	0	0	0	0	0	0	0	0	0	0	0	0	0	0	0	0	0	0	0	0	0	0	0	0	0	0	0	0	0	0	0	0	0	0	0	0	0	0	0	0	0	0	0	1	0
ENSMUSG00000002033	0	0	0	0	0	0	0	0	0	0	0	0	0	0	0	0	0	0	0	0	0	0	0	0	0	0	0	0	0	0	0	0	0	0	0	0	0	0	0	0	0	0	0	0	0	0	0	0	0
ENSMUSG00000002043	167	98	150	120	224	159	305	164	210	330	345	165	486	192	219	208	139	177	137	338	179	214	265	238	288	160	175	172	206	296	253	312	313	455	283	215	255	188	302	363	235	243	378	492	191	429	311	165	109
ENSMUSG00000002052	284	201	196	703	309	441	346	350	382	282	284	327	244	234	327	231	191	193	234	326	234	321	257	428	617	420	386	699	731	611	415	310	347	346	272	250	393	496	479	431	466	451	230	458	439	331	265	513	391
ENSMUSG00000002055	936	1312	1122	1193	1353	1011	1346	1206	961	1211	1373	1324	1251	1125	1362	1147	1022	1034	998	1276	1237	1131	1227	1545	992	876	868	1267	1248	1051	1163	836	922	880	789	911	1088	1287	1058	1342	1223	1076	1022	1241	1003	1134	620	998	324
ENSMUSG00000002057	1	0	1	1	1	1	3	0	0	1	1	1	4	1	1	1	1	1	1	3	1	3	1	1	0	0	0	9	1	1	1	1	1	1	0	1	8	1	1	1	1	2	2	4	2	0	0	1	3
ENSMUSG00000002058	2	1	5	2	5	7	2	1	1	11	29	5	15	36	41	104	7	48	13	7	7	9	9	35	29	19	23	3	2	3	9	25	4	2	3	10	34	9	12	3	5	3	37	4	9	36	2	6	16
ENSMUSG00000002059	6	44	8	35	24	39	175	55	137	73	7	50	21	70	180	118	45	19	104	138	22	69	63	61	119	11	49	96	37	6	50	8	6	99	28	9	120	113	151	19	25	55	35	105	9	79	12	146	31
ENSMUSG00000002064	424	249	124	277	164	182	207	258	264	351	212	290	258	248	276	259	324	215	252	326	228	190	299	199	214	168	219	200	160	165	174	205	225	122	148	116	227	234	152	173	225	177	179	181	197	193	110	173	63
ENSMUSG00000002068	512	705	941	550	513	383	314	315	272	825	750	424	593	675	467	1376	682	821	456	424	660	39	522	716	330	359	213	383	397	204	161	459	128	255	243	293	422	734	301	475	466	725	309	380	476	157	540	648	2843
ENSMUSG00000002076	1419	1576	1345	1717	1379	1308	1673	1483	1579	1768	1605	1909	1043	1223	1232	1133	1297	1304	1072	1328	1234	1150	1043	1389	1589	1368	1418	1712	1571	1382	1322	1265	1946	1343	1409	1754	1270	1361	1042	1436	1317	1174	1527	1945	1386	1597	1024	1122	370
ENSMUSG00000002083	2	3	5	3	3	3	3	3	3	3	7	3	3	3	4	3	4	9	4	3	4	3	2	3	13	3	37	2	2	3	2	3	3	3	4	34	2	17	3	4	2	3	3	2	3	3	4	4	14
ENSMUSG00000002100	0	0	0	0	0	0	0	0	0	0	0	0	0	0	0	0	0	0	0	0	0	0	0	0	0	0	3	0	0	0	0	0	0	0	0	0	0	1	0	0	0	0	1	0	0	0	0	0	0
ENSMUSG00000002102	53	85	64	104	184	69	150	83	113	93	142	105	51	35	53	69	82	27	10	69	71	62	88	105	137	60	97	166	201	78	68	119	153	86	92	181	135	129	84	164	64	87	83	104	103	97	43	138	109
ENSMUSG00000002103	56	41	36	7	17	32	27	39	30	7	93	97	6	7	21	80	47	20	2	9	40	3	48	3	56	47	2	100	105	42	4	48	10	29	44	88	17	4	139	59	2	39	24	80	30	61	26	65	12
ENSMUSG00000002104	18	7	4	4	6	32	56	13	26	3	7	34	4	16	31	13	43	4	3	25	16	18	16	3	4	39	4	8	41	45	126	22	42	10	21	23	2	2	3	17	8	1	19	10	5	10	26	3	1
ENSMUSG00000002105	53	62	82	85	37	97	89	81	8	2	140	81	70	114	84	125	10	123	318	135	78	76	25	192	123	55	81	110	132	51	129	91	47	16	25	2	76	46	126	56	118	21	10	84	77	98	60	51	1
ENSMUSG00000002107	3313	2437	2553	2380	2250	2857	2840	3420	3062	2880	3813	3796	2530	2574	2170	2691	2969	2390	3873	2704	3011	3915	2867	3327	3062	3116	2609	3193	2760	3427	2934	2880	2935	3394	3586	2723	2727	2001	2766	3368	2866	2595	3354	2859	3316	3382	3681	2076	312
ENSMUSG00000002108	2	2	1	2	2	1	2	2	3	2	2	2	2	2	1	1	3	1	1	1	2	1	1	2	3	3	3	2	2	2	33	37	2	2	2	2	2	1	2	2	2	3	2	2	3	2	2	1	18
ENSMUSG00000002109	380	353	266	406	334	329	318	426	344	363	336	484	231	271	324	264	291	281	301	394	336	322	367	357	401	298	311	475	323	306	310	242	356	450	224	339	415	332	360	397	336	288	284	450	325	374	264	333	87
ENSMUSG00000002111	0	0	0	1	0	0	0	0	0	0	0	0	1	1	0	0	0	2	0	0	2	0	0	0	0	0	0	0	5	0	0	2	0	3	0	0	0	0	0	0	0	0	0	0	0	0	0	0	13
ENSMUSG00000002129	962	644	697	702	603	580	651	574	619	759	717	716	758	879	633	732	738	489	544	700	571	717	529	776	645	615	660	822	717	640	747	543	610	813	630	661	557	923	539	750	709	692	802	789	663	700	538	584	246
ENSMUSG00000002147	19	67	62	107	93	28	41	87	57	86	92	51	107	35	182	74	157	60	121	73	64	38	30	10	39	59	66	38	39	54	55	101	73	28	94	40	69	56	37	24	96	112	78	105	80	49	119	53	452
ENSMUSG00000002190	40	17	45	4	1	9	1	10	5	1	1	10	1	1	1	1	5	1	3	6	5	2	13	3	0	1	3	3	36	1	0	1	1	1	28	9	2	0	1	24	1	1	1	1	5	27	1	11	4
ENSMUSG00000002204	0	0	0	0	0	2	0	0	0	0	0	0	0	0	0	0	1	1	0	0	0	0	0	0	0	0	0	0	0	0	0	0	0	0	0	0	0	0	0	0	0	0	0	0	0	0	0	0	0
ENSMUSG00000002205	553	606	552	550	425	363	340	539	433	663	689	644	413	79	217	168	407	364	89	339	121	251	185	121	437	316	304	559	528	363	941	333	229	256	490	469	151	241	89	316	278	269	160	293	242	211	149	68	139
ENSMUSG00000002210	5	9	5	5	51	73	28	45	16	18	9	5	91	7	7	6	13	5	40	3	24	4	4	6	2	18	57	24	62	4	3	46	22	2	45	2	36	238	51	2	13	44	1	4	27	2	2	4	0
ENSMUSG00000002221	521	963	701	727	658	774	694	672	722	761	772	523	642	521	886	731	626	844	550	769	563	602	608	624	905	780	750	1001	823	813	665	717	916	610	459	623	511	764	567	681	857	680	758	863	731	736	589	623	166
ENSMUSG00000002222	2407	2604	2210	2651	2842	2328	2929	2832	2893	2719	3546	3564	2219	1961	2092	2055	2651	2181	2363	2536	1672	2351	2259	2345	2398	2559	2383	3209	3048	2561	2285	2188	2537	2166	2173	2178	1761	2328	1728	2045	2641	1783	2065	2401	2404	2347	1962	1630	1529
ENSMUSG00000002227	3	3	2	4	2	1	2	3	3	3	3	3	4	4	3	2	6	8	2	8	12	2	2	2	2	2	2	2	2	3	2	2	2	3	2	3	2	2	2	2	2	2	2	2	2	3	3	5	18
ENSMUSG00000002228	0	0	0	0	0	0	0	0	0	0	0	0	0	0	0	0	0	0	0	0	0	0	0	0	0	0	0	0	0	0	0	0	0	0	0	0	0	0	0	0	0	0	0	0	0	0	0	0	0
ENSMUSG00000002233	1	1	1	1	1	0	1	1	1	1	1	1	1	1	1	1	1	1	1	16	0	1	1	1	3	0	0	1	1	1	1	1	1	1	0	1	1	1	1	0	0	0	0	0	0	1	1	1	0
ENSMUSG00000002240	0	1	0	0	1	0	0	0	2	0	1	0	1	0	0	0	0	0	0	0	0	0	0	0	0	1	0	0	1	0	0	2	0	1	0	2	0	0	0	0	2	0	0	0	0	0	1	1	1
ENSMUSG00000002249	1	0	0	0	0	0	0	0	0	5	0	0	0	0	0	1	1	0	1	0	0	0	0	1	0	3	0	2	1	0	0	0	0	0	0	0	1	0	0	0	0	1	2	0	0	0	0	0	34
ENSMUSG00000002250	381	407	284	328	390	297	540	383	363	508	522	612	268	333	305	317	401	322	288	360	294	426	364	407	538	440	372	611	488	398	477	416	453	432	388	289	492	514	493	525	580	452	562	660	399	405	378	248	111
ENSMUSG00000002257	2	20	0	18	12	11	22	5	9	7	2	30	0	4	8	17	32	1	25	6	2	0	1	0	19	13	20	8	13	14	13	15	18	3	14	4	19	2	28	14	3	5	9	11	7	11	20	6	33
ENSMUSG00000002265	16	16	36	10	12	14	24	25	26	17	18	24	45	26	34	53	46	30	80	41	42	64	40	42	7	29	31	15	22	38	7	23	18	16	34	14	14	51	48	18	18	40	14	3	32	21	12	29	43
ENSMUSG00000002266	1	0	7	0	6	0	14	0	5	7	6	0	24	27	0	14	13	18	17	0	5	6	20	4	0	2	11	5	0	1	0	3	0	0	1	14	11	3	8	0	1	3	2	0	3	3	2	6	28
ENSMUSG00000002274	0	0	0	0	0	0	0	0	0	0	0	0	0	0	0	1	0	0	0	0	0	0	0	0	0	0	0	0	0	0	0	0	0	0	0	0	0	0	0	0	0	0	0	0	0	0	0	0	0
ENSMUSG00000002279	5	10	36	6	3	44	3	55	45	102	4	61	74	8	5	69	96	7	3	17	2	11	6	3	11	17	2	56	3	4	94	3	46	3	3	3	3	3	20	3	47	105	10	5	45	53	3	59	0
ENSMUSG00000002280	124	41	30	212	636	24	130	242	22	314	237	27	20	24	36	423	58	469	38	261	31	31	26	26	178	319	690	20	17	286	20	251	92	24	23	25	52	524	556	26	190	26	27	343	225	24	736	29	62
ENSMUSG00000002289	0	0	1	0	0	1	0	0	0	0	0	0	0	0	0	0	0	2	1	0	1	0	0	0	0	0	0	0	0	0	0	0	0	0	0	0	0	0	0	0	0	1	1	0	0	0	0	2	3
ENSMUSG00000002297	4401	4507	5739	5169	4607	3479	4842	4510	4680	6009	5482	4885	5642	5083	5889	5246	6893	6616	6633	4542	4035	4037	3735	4625	3417	4238	3338	3614	4088	3166	3278	4171	3604	3325	3683	3191	2956	2915	2464	3099	4708	2956	3734	2973	4183	2863	3604	4035	4505
ENSMUSG00000002307	732	872	963	823	1015	904	928	928	921	979	1115	1179	758	559	734	585	679	670	384	617	654	570	781	695	918	752	669	836	818	674	796	845	704	545	643	800	791	700	612	560	720	434	560	961	662	701	576	908	174
ENSMUSG00000002308	1426	1475	683	1676	2916	1584	2929	2076	2110	1811	2395	2047	1709	1448	1106	1741	1595	904	879	1586	1107	893	2362	2898	2256	1591	2348	3075	3298	1385	2706	2144	2874	2446	1953	2666	2344	2463	2765	1982	2056	2302	1561	3631	1806	1579	1424	1785	204
ENSMUSG00000002319	78	366	42	355	576	509	572	344	162	306	93	171	121	540	853	319	254	518	232	252	129	37	313	353	820	288	418	570	798	332	717	406	339	260	218	242	824	420	338	306	624	250	560	359	387	315	184	394	187
ENSMUSG00000002320	31	39	64	36	47	20	40	21	34	39	14	92	45	41	185	46	176	73	154	50	28	59	34	47	10	12	19	26	65	1	11	11	31	29	17	17	15	21	23	24	15	18	17	53	7	23	51	26	0
ENSMUSG00000002324	1	1	0	1	1	3	1	1	1	0	1	1	1	1	0	0	2	1	0	0	0	1	1	1	1	1	1	1	1	1	1	0	0	0	0	0	1	1	1	0	1	1	0	1	1	1	0	0	0
ENSMUSG00000002325	40	34	716	45	206	238	26	56	84	30	32	72	891	56	40	122	87	73	25	25	84	30	28	278	224	20	112	227	25	34	29	25	227	167	21	28	30	27	28	24	127	17	19	252	22	187	29	599	35
ENSMUSG00000002326	0	1	1	4	0	1	5	1	1	0	1	0	1	0	0	0	1	0	1	1	0	6	0	0	1	6	1	4	1	1	6	8	0	3	0	3	0	2	23	0	0	4	0	0	7	1	2	1	9
ENSMUSG00000002329	38	12	15	4	4	6	6	0	0	0	2	15	37	0	9	19	2	5	3	20	21	14	13	4	14	0	29	14	6	22	1	3	0	2	30	0	1	12	36	0	1	23	10	27	8	22	26	1	10
ENSMUSG00000002332	506	480	431	556	672	586	654	676	595	632	510	606	330	241	288	347	343	285	255	427	455	420	405	420	752	579	604	797	751	585	783	555	745	625	563	610	467	542	481	446	509	393	327	726	446	417	330	421	97
ENSMUSG00000002341	0	0	0	1	7	2	0	0	0	0	0	1	3	0	4	0	0	0	0	1	2	0	7	0	0	0	0	0	0	0	0	2	0	0	0	0	0	5	6	0	2	2	0	1	0	6	0	2	0
ENSMUSG00000002342	22	6	11	57	2	27	32	2	30	14	3	28	4	5	8	3	21	67	2	27	1	2	3	35	1	4	14	24	2	3	7	78	2	7	1	16	12	3	2	3	4	48	15	17	1	2	22	5	0
ENSMUSG00000002343	1	1	0	1	1	1	1	1	1	1	1	1	1	1	0	0	2	0	6	1	1	1	1	1	1	1	1	1	1	1	1	1	1	1	1	1	1	1	1	14	1	1	1	1	1	1	1	1	0
ENSMUSG00000002345	5	47	10	71	3	39	12	22	15	35	3	48	45	3	6	67	12	11	14	4	11	5	5	40	66	7	55	48	35	27	32	6	139	35	13	14	145	109	128	24	75	105	43	15	86	57	32	45	14
ENSMUSG00000002346	0	0	0	0	0	0	0	0	0	0	0	0	0	0	0	0	0	0	0	0	0	0	0	0	0	0	0	0	0	0	0	0	0	0	0	0	0	0	0	0	0	0	0	0	0	0	0	0	1
ENSMUSG00000002365	1321	1535	1944	1313	1212	1673	1547	1728	1441	1465	1262	1527	1452	1745	1914	1950	1687	2211	2084	1430	1625	1820	1362	1527	1170	1316	1204	1048	1065	913	1188	1137	895	1180	1322	1097	1290	1111	1163	1480	931	921	1019	753	1003	1137	1044	1183	589
ENSMUSG00000002372	1145	1359	1557	1789	987	1479	1004	1175	906	846	966	1137	1837	724	588	1641	1013	1058	820	535	882	780	1606	1130	1625	956	1494	1217	1315	1029	1184	1000	1128	902	605	915	1670	1681	1823	1405	2151	1897	1137	825	1661	772	815	1298	1124
ENSMUSG00000002379	379	215	383	301	511	313	464	264	329	297	659	93	337	429	163	351	215	119	362	462	292	847	311	576	332	420	75	406	586	181	264	374	437	195	341	173	342	263	551	255	206	203	280	219	300	325	286	249	45
ENSMUSG00000002384	0	0	0	0	0	0	0	0	0	0	0	0	0	0	0	0	0	1	0	0	0	0	0	0	0	0	0	0	0	0	0	0	0	0	0	0	0	0	0	0	0	0	0	0	0	1	0	0	0
ENSMUSG00000002393	1	2	0	0	7	10	9	6	4	0	1	5	3	2	1	0	9	3	0	0	1	1	5	7	2	4	7	1	3	7	4	2	4	0	2	0	4	2	0	3	6	1	7	6	0	2	9	3	0
ENSMUSG00000002395	16	2	50	3	2	38	1	46	17	35	5	97	21	55	3	40	2	29	2	32	32	16	2	34	17	58	36	38	15	58	99	4	58	2	10	15	32	75	32	23	43	42	50	1	36	35	67	58	43
ENSMUSG00000002396	0	3	0	1	2	3	0	1	3	0	0	0	0	1	0	2	3	1	0	0	0	0	0	5	0	1	3	5	0	0	1	0	1	0	0	0	1	0	0	0	0	0	3	0	0	0	1	1	0
ENSMUSG00000002409	30	4	6	15	1	10	0	0	9	1	1	4	1	2	1	1	1	1	3	7	3	1	2	1	0	1	14	5	1	1	42	9	1	1	0	18	1	2	1	11	5	15	9	4	14	0	4	1	2
ENSMUSG00000002413	58	80	33	60	44	70	70	50	80	76	47	77	72	67	100	82	64	94	100	64	31	74	79	41	44	36	47	28	42	42	49	33	29	47	36	31	48	64	33	38	62	62	31	33	65	56	45	44	90
ENSMUSG00000002416	95	70	21	52	107	112	59	69	54	72	97	70	65	59	67	32	67	57	40	71	82	49	54	72	115	102	131	196	90	94	104	81	126	135	99	91	89	71	87	75	49	69	79	182	55	63	87	107	54
ENSMUSG00000002428	81	74	16	23	21	44	65	47	77	41	64	33	35	35	43	68	32	22	115	28	29	24	19	41	30	80	39	13	21	75	41	73	45	51	88	56	34	22	51	53	33	49	49	29	24	70	37	54	41
ENSMUSG00000002455	647	823	532	748	923	887	830	830	804	848	837	899	664	525	486	631	492	583	336	746	780	617	694	803	1047	852	871	1153	993	757	1168	863	869	717	707	671	899	1071	852	888	1060	867	749	970	985	866	721	664	85
ENSMUSG00000002458	3	6	7	10	10	0	3	7	4	10	7	8	9	5	6	20	8	25	10	12	22	22	7	4	0	10	3	6	2	4	12	1	2	8	7	4	6	10	6	6	19	11	11	2	7	4	3	0	21
ENSMUSG00000002459	0	0	0	0	0	0	0	0	0	0	0	0	0	0	6	0	0	0	0	5	0	0	0	0	0	0	0	0	0	0	0	0	0	0	0	0	0	0	0	0	0	0	0	0	0	0	0	0	0
ENSMUSG00000002475	98	175	227	89	82	148	114	158	108	107	114	125	57	93	117	89	86	159	115	109	73	100	45	78	90	92	64	89	82	61	113	89	80	114	90	91	50	65	48	93	34	47	76	82	36	50	80	37	11
ENSMUSG00000002477	517	310	226	550	753	567	730	550	620	652	792	706	317	233	232	257	322	220	226	577	396	475	470	528	1030	751	840	1200	1131	797	795	744	769	647	688	717	650	746	501	602	484	357	509	1010	447	647	415	478	60
ENSMUSG00000002486	232	22	94	162	171	143	118	289	161	237	326	103	22	29	120	171	45	14	19	182	103	76	183	113	367	359	164	195	626	191	133	305	159	538	254	235	76	54	221	212	43	168	162	96	81	238	96	94	14
ENSMUSG00000002489	303	578	801	449	497	418	462	555	621	644	451	487	534	624	633	560	451	615	529	568	860	471	483	650	299	687	674	441	401	543	625	860	809	859	912	990	622	840	729	933	462	718	793	768	603	844	1011	869	514
ENSMUSG00000002496	73	36	56	112	54	45	41	77	14	16	43	37	8	125	32	41	42	80	15	70	55	65	58	111	59	37	54	92	80	69	137	49	54	101	113	67	63	28	18	55	26	53	107	54	66	109	5	55	80
ENSMUSG00000002500	6	5	5	6	6	5	6	5	5	6	6	6	6	6	6	6	18	5	6	6	6	7	7	6	6	5	5	6	6	6	6	5	5	5	5	5	6	6	6	6	6	6	6	6	6	6	6	6	1
ENSMUSG00000002504	23	2	10	68	11	5	11	59	10	1	2	14	72	2	18	6	6	8	31	29	29	8	5	4	7	53	12	4	1	46	20	8	8	30	32	4	0	13	1	17	7	4	10	32	29	1	21	14	28
ENSMUSG00000002524	323	197	146	61	113	118	79	141	61	117	47	162	317	107	310	153	99	380	316	128	184	231	192	148	72	174	98	131	200	69	166	119	117	146	94	30	159	113	293	158	115	136	157	241	163	89	67	67	126
ENSMUSG00000002546	574	618	383	743	514	611	616	438	566	528	452	511	392	441	554	449	415	487	235	639	516	548	828	557	755	615	699	822	844	589	740	419	653	652	487	594	717	962	823	653	829	686	659	805	622	716	524	559	77
ENSMUSG00000002550	0	0	0	0	0	0	0	0	0	0	0	0	0	0	0	0	1	1	0	0	0	0	0	0	0	0	0	0	0	0	0	0	0	0	0	0	0	0	0	0	0	0	0	0	0	0	0	1	0
ENSMUSG00000002565	8	2	9	13	3	2	1	1	2	3	4	2	1	2	17	10	11	9	8	1	7	3	0	0	0	26	0	4	3	3	2	0	1	8	2	3	1	0	0	0	3	1	3	8	7	0	0	0	5
ENSMUSG00000002578	536	612	586	464	609	428	432	532	487	418	414	403	392	241	394	431	359	336	373	500	522	337	344	389	484	568	650	630	679	441	525	828	821	734	746	735	536	538	591	619	360	446	612	602	437	446	798	643	223
ENSMUSG00000002580	8	7	10	11	54	5	16	25	17	7	89	9	68	14	12	41	10	67	8	21	5	82	13	27	3	35	11	22	4	9	6	7	6	6	19	7	6	6	6	44	18	6	22	83	32	6	6	63	4
ENSMUSG00000002588	0	1	0	0	0	0	0	1	0	0	0	0	0	0	0	0	0	3	1	0	0	1	1	0	0	0	0	0	0	0	0	0	0	0	2	0	0	1	0	0	0	0	0	0	0	0	0	0	0
ENSMUSG00000002602	1	0	1	1	3	1	0	0	0	1	1	9	1	58	1	1	1	5	1	24	5	59	1	15	0	2	0	0	1	1	1	0	1	0	0	0	1	1	1	0	0	7	11	6	6	9	0	1	0
ENSMUSG00000002603	1	1	0	1	0	2	0	0	0	0	0	0	1	1	0	0	0	3	0	0	0	0	0	0	0	0	0	0	0	1	0	0	0	0	0	0	0	0	0	0	0	1	0	0	0	0	0	0	0
ENSMUSG00000002608	174	163	163	139	55	148	87	150	113	115	194	147	99	142	150	178	146	34	181	102	103	207	130	195	169	111	132	183	92	121	271	132	93	142	114	83	102	209	165	165	384	213	182	114	164	140	116	77	98
ENSMUSG00000002617	36	23	74	45	5	14	22	30	7	8	30	50	0	21	26	13	41	73	1	14	16	29	44	66	49	75	32	31	29	0	47	36	23	53	48	51	38	12	6	14	15	9	10	4	32	17	36	20	0
ENSMUSG00000002625	834	367	80	405	59	52	309	230	220	272	219	405	62	18	100	244	179	82	35	232	228	63	14	107	92	220	170	11	363	138	368	368	228	151	371	229	119	240	8	150	278	109	143	448	378	301	211	506	39
ENSMUSG00000002633	1	15	1	3	1	5	5	2	0	2	4	1	4	2	2	0	1	7	3	2	2	3	1	5	1	2	1	0	4	4	2	1	0	2	3	6	0	0	0	1	0	0	0	1	0	0	0	2	0
ENSMUSG00000002635	4372	5545	5117	5312	5138	5725	6043	5251	4723	4955	6888	5248	4218	4982	4621	5287	4480	4775	3945	5059	5646	3183	4278	5964	5427	4407	5207	6214	4028	4435	5025	4382	6256	5959	4077	7210	4523	3809	3637	5410	4947	3419	5479	6645	3614	4149	4230	4326	347
ENSMUSG00000002658	134	290	145	497	102	194	327	236	228	271	237	155	21	210	242	60	121	44	362	189	344	312	67	318	221	277	190	231	320	442	178	129	281	432	93	272	414	161	421	206	140	247	421	179	164	511	445	520	551
ENSMUSG00000002660	21	20	41	26	32	305	20	275	161	29	32	37	420	31	55	43	436	82	56	36	36	43	37	30	15	15	128	21	16	60	25	28	26	25	24	370	223	33	27	27	22	21	157	282	291	24	81	398	304
ENSMUSG00000002661	510	574	573	238	362	244	670	305	200	448	584	382	308	471	457	463	139	379	232	539	406	182	268	502	566	370	391	673	931	110	553	1027	494	776	286	810	427	343	385	484	254	205	267	390	390	522	848	427	14
ENSMUSG00000002668	8	11	7	10	25	14	19	13	21	21	13	17	8	14	16	6	8	10	7	16	9	14	11	21	23	10	16	34	26	10	33	14	31	13	15	21	24	19	9	15	23	20	15	14	24	16	16	18	15
ENSMUSG00000002679	219	210	111	148	214	213	173	156	227	380	315	359	666	127	233	233	243	152	250	357	329	201	240	116	189	117	173	188	71	236	174	167	112	82	196	128	253	237	146	267	274	257	178	137	189	157	170	208	225
ENSMUSG00000002688	278	192	270	247	172	196	194	214	144	197	145	190	338	173	104	232	343	298	220	189	252	230	214	239	227	193	192	173	146	187	204	159	130	107	114	123	172	178	169	217	334	179	243	147	246	185	222	242	61
ENSMUSG00000002699	52	10	29	38	55	41	58	44	22	36	46	25	42	41	37	63	43	42	46	52	89	19	74	35	66	63	40	31	68	30	29	31	33	15	28	57	108	81	67	66	30	52	102	91	55	53	81	89	19
ENSMUSG00000002718	605	460	445	607	571	405	517	510	490	436	551	983	487	400	583	504	417	434	336	470	589	688	246	437	531	438	420	668	576	509	567	391	412	333	533	542	637	623	555	484	794	610	530	442	769	445	613	345	369
ENSMUSG00000002728	96	28	80	26	50	57	49	54	38	63	69	73	194	173	150	162	92	108	115	78	97	55	76	78	41	38	50	55	31	28	46	39	56	55	39	44	35	37	32	46	37	42	37	38	32	27	44	32	43
ENSMUSG00000002731	5	4	0	0	0	3	3	1	0	1	1	0	4	3	0	1	3	4	4	2	0	2	0	2	0	2	0	5	0	2	0	3	1	0	0	5	3	0	2	0	1	0	1	1	1	2	2	2	2
ENSMUSG00000002732	1	0	0	1	0	0	0	0	0	0	0	0	1	1	0	0	0	1	0	0	0	2	0	0	0	0	0	0	0	0	0	0	0	0	0	3	0	0	0	0	4	0	0	0	0	0	0	0	0
ENSMUSG00000002733	1915	2243	2340	1750	1403	1521	1845	1733	1620	1788	1727	1783	1839	1684	1757	1974	1852	2231	2476	1880	1673	2225	1535	1746	1398	1161	1253	1129	1157	1582	1266	1394	1228	1792	1148	1086	1207	1085	1084	1389	1629	1440	1556	1094	1961	2038	1621	1347	1251
ENSMUSG00000002741	41	48	30	40	56	40	54	41	55	56	60	53	23	48	49	41	31	29	38	63	53	54	97	55	77	40	88	97	67	28	42	49	62	50	44	43	83	109	52	66	55	49	43	110	104	50	82	72	53
ENSMUSG00000002748	2376	2374	2276	2806	2633	2553	2974	2673	2552	2613	2374	2540	1623	1787	2121	1868	1897	1987	1485	1981	1979	2567	2393	2487	3405	2246	2400	3527	3440	2471	2987	2343	2179	2203	2330	2101	2149	2700	1911	2034	2433	2179	2182	2610	2080	2319	1671	1571	366
ENSMUSG00000002763	111	7	105	10	9	7	6	35	60	8	30	34	10	12	13	11	11	20	11	9	15	10	53	8	79	4	25	7	50	84	8	7	24	7	6	25	18	10	8	7	114	4	64	6	31	7	7	10	0
ENSMUSG00000002767	254	364	271	606	403	465	575	435	486	548	509	624	250	473	354	335	905	399	260	312	422	295	516	496	510	240	250	552	630	415	420	425	560	409	427	361	536	665	282	597	441	398	309	484	569	302	337	242	130
ENSMUSG00000002768	250	396	173	425	482	467	421	510	396	314	389	526	420	220	415	176	417	243	476	293	254	353	277	400	677	524	610	572	562	483	736	529	526	427	510	477	423	599	489	367	345	425	284	423	436	449	368	431	517
ENSMUSG00000002769	3	3	1	3	17	1	2	12	2	2	2	2	3	3	2	6	6	1	1	1	1	1	1	2	2	2	2	2	2	2	2	2	2	7	1	65	2	1	2	2	8	1	1	2	2	2	2	1	15
ENSMUSG00000002771	48	11	80	52	30	7	46	12	14	54	54	213	84	31	8	62	37	7	7	16	139	46	5	181	10	251	169	224	28	82	283	105	202	289	142	260	42	61	48	12	82	109	132	335	28	13	48	26	84
ENSMUSG00000002778	753	1263	1330	1088	1190	1132	992	1150	935	753	789	796	1042	1622	1318	1216	938	1573	869	1208	1346	968	1025	1236	1010	915	992	1136	984	906	1112	979	1139	1345	810	1066	1004	1086	1128	1101	877	822	892	1304	872	1057	1027	1186	742
ENSMUSG00000002781	4	0	4	1	4	3	11	0	5	1	4	5	2	2	3	3	3	1	0	4	2	4	1	6	6	7	1	2	7	5	4	2	20	5	9	2	2	2	5	10	5	7	6	11	2	6	3	3	1
ENSMUSG00000002791	3	3	1	1	1	1	1	1	1	1	1	1	1	1	1	1	1	3	1	1	1	1	1	1	1	1	1	1	1	1	1	1	1	1	1	1	1	1	1	1	1	4	1	1	1	1	1	1	0
ENSMUSG00000002797	5558	5197	3573	5585	7248	5671	7143	6594	7365	6838	8328	7549	3898	2992	2797	3010	3573	2914	2781	4833	4261	4753	4779	5234	9340	8237	7975	11886	11636	7575	8680	9036	10392	9311	7366	10204	7270	7482	6352	6392	5915	4622	5971	9880	5507	7103	4703	5432	1891
ENSMUSG00000002799	199	142	302	240	117	210	207	215	257	166	188	132	154	375	425	266	284	318	238	281	253	363	452	231	130	189	241	144	167	130	228	205	124	246	153	212	206	249	164	211	215	151	167	299	105	336	225	195	259
ENSMUSG00000002803	2	2	2	2	2	1	1	2	1	2	2	2	2	2	2	2	2	2	2	2	2	2	2	2	1	1	1	1	1	2	1	2	2	2	2	2	2	1	2	2	1	1	1	1	1	2	2	2	0
ENSMUSG00000002804	73	71	40	53	64	52	71	48	91	87	67	49	20	27	11	10	42	21	18	33	20	16	32	34	81	58	75	88	116	49	68	64	53	38	35	48	46	71	16	32	59	18	32	36	33	40	22	20	72
ENSMUSG00000002808	9	5	5	38	3	5	14	11	5	7	11	6	0	0	3	7	1	6	3	2	1	4	1	4	4	9	11	8	20	5	6	11	17	0	6	10	4	0	0	9	6	0	0	10	2	8	6	4	7
ENSMUSG00000002812	112	162	94	93	129	162	141	106	89	213	115	149	158	218	141	182	150	125	200	187	188	108	130	165	115	98	111	122	73	150	176	90	69	64	102	123	110	174	85	142	131	156	89	113	132	171	142	122	159
ENSMUSG00000002814	11	8	36	36	112	6	22	98	6	8	9	11	11	13	12	10	54	84	9	9	7	10	10	80	26	10	5	8	7	87	9	7	8	7	109	8	122	11	8	7	5	60	71	60	39	58	7	159	108
ENSMUSG00000002820	1	1	0	1	1	0	1	1	1	1	1	1	1	1	1	1	1	2	1	1	0	1	1	1	1	4	1	1	1	1	1	1	1	1	0	1	1	1	1	1	1	0	0	1	1	1	1	1	3
ENSMUSG00000002825	19	18	14	23	14	8	125	14	14	15	16	53	24	28	298	15	14	12	142	12	10	14	12	42	11	11	11	13	12	17	14	13	12	14	110	14	14	12	14	13	8	17	253	11	36	16	15	14	146
ENSMUSG00000002831	0	0	0	0	0	0	0	0	0	0	0	0	0	0	0	0	0	0	0	0	0	0	0	0	0	0	0	0	0	0	0	0	0	0	0	0	0	0	0	0	0	0	0	0	0	0	0	0	0
ENSMUSG00000002833	45	260	235	52	286	177	84	9	102	91	29	83	396	274	1856	132	688	380	33	207	147	1177	360	213	121	118	43	47	142	37	28	15	17	12	156	14	117	47	149	144	75	38	62	193	97	11	8	28	96
ENSMUSG00000002835	32	52	90	27	90	45	32	67	62	19	33	50	28	41	22	28	48	57	14	15	60	56	14	89	31	19	61	39	25	106	205	70	13	71	84	27	65	48	57	78	60	78	91	78	103	85	110	93	403
ENSMUSG00000002844	402	532	198	334	150	223	257	179	135	213	200	182	113	165	106	233	149	133	137	125	132	169	120	176	287	187	231	259	224	299	277	224	199	246	322	270	161	118	339	325	400	283	144	215	180	177	70	68	25
ENSMUSG00000002845	733	529	809	572	647	506	679	608	586	606	535	510	802	867	1167	895	806	1220	867	755	674	778	669	784	498	403	366	444	451	326	447	400	382	499	285	366	421	463	372	356	418	397	559	478	519	459	527	558	515
ENSMUSG00000002846	35	26	534	41	29	54	19	20	19	27	160	37	39	52	48	72	36	29	32	27	148	33	62	126	119	188	13	92	17	34	27	23	23	23	18	255	115	30	364	20	28	120	15	74	150	222	69	30	39
ENSMUSG00000002847	42	37	11	25	32	25	22	36	55	23	32	32	23	7	20	10	15	18	11	4	12	20	43	38	53	40	29	32	34	28	23	20	37	60	12	24	49	36	66	14	51	22	27	11	31	29	5	28	11
ENSMUSG00000002870	2090	2901	2386	3323	3038	2536	3068	3216	3171	2959	3137	2652	2224	2409	2454	2630	2150	2334	2126	2925	2258	2165	2732	2873	3413	2616	2780	4293	4059	2650	3414	2738	3605	3359	2535	3190	3388	3442	2469	2759	2857	2544	2569	3968	2321	3259	2016	2441	645
ENSMUSG00000002871	186	254	181	179	163	227	128	166	150	259	128	201	207	184	186	248	202	211	129	203	235	100	128	203	93	62	57	111	102	88	149	240	255	126	172	201	110	93	84	152	100	145	177	99	95	101	155	67	28
ENSMUSG00000002881	579	577	777	487	426	513	533	371	583	479	449	433	561	586	746	725	803	869	936	442	695	640	508	687	433	634	479	327	523	478	296	513	432	422	701	509	379	358	377	468	261	328	284	231	349	353	599	324	740
ENSMUSG00000002885	0	0	0	0	0	0	0	0	0	0	0	2	0	0	6	0	0	2	0	0	0	5	0	1	0	0	1	0	0	0	0	6	0	2	1	0	9	0	0	0	0	0	0	0	0	0	0	0	0
ENSMUSG00000002897	246	367	226	241	339	251	329	219	206	298	306	299	132	158	119	133	122	137	150	107	167	205	263	282	135	222	208	454	276	244	197	313	326	217	362	197	313	351	302	226	319	162	365	365	181	331	274	211	40
ENSMUSG00000002900	3355	5055	3252	3540	4168	4575	3956	4532	4206	4506	3858	5541	2424	2980	2405	2658	2394	2849	2119	3725	4492	3037	2662	4119	2119	2015	2001	5562	3439	4237	3361	4720	5680	4152	5264	5448	2581	2097	3335	4885	2846	2778	4809	4428	1950	3554	2825	1396	436
ENSMUSG00000002908	1	2	16	2	0	0	1	1	1	23	1	27	2	3	1	17	2	1	0	17	0	12	1	2	39	16	1	0	1	1	5	1	1	1	3	5	0	14	1	1	4	0	0	0	15	1	1	1	0
ENSMUSG00000002910	1123	1084	1030	1241	1092	949	1312	1132	1268	1672	1393	1232	1388	1244	1516	1373	1283	1519	1173	1601	1278	1132	1688	1693	1145	1260	867	1124	1295	833	1184	1051	1318	1066	875	942	1684	1516	1020	1245	1013	1160	1491	1289	1214	1270	1142	1587	120
ENSMUSG00000002930	1	1	1	1	1	0	0	0	0	1	1	1	1	1	1	1	1	1	1	0	0	0	0	0	0	0	0	0	0	1	0	0	0	0	0	1	0	0	0	0	0	0	0	0	0	1	0	1	14
ENSMUSG00000002944	140	138	211	92	50	130	108	119	96	151	119	66	159	232	233	271	243	219	326	124	160	207	195	146	75	101	72	72	66	82	52	99	65	106	80	66	110	50	85	92	66	131	82	50	101	113	118	120	223
ENSMUSG00000002948	9	1	13	13	29	23	36	18	29	30	37	41	41	91	30	20	14	17	12	25	31	43	36	28	0	2	13	16	14	10	11	16	41	9	32	21	17	18	24	13	48	34	32	43	34	21	25	21	10
ENSMUSG00000002949	29	126	48	35	37	64	41	103	67	57	24	22	28	88	96	70	97	23	45	103	86	59	14	26	44	71	69	40	67	181	98	36	49	30	34	80	36	67	80	57	77	42	64	57	43	55	66	48	144
ENSMUSG00000002957	235	242	29	8	75	167	68	165	83	3	100	235	41	35	271	6	235	6	122	23	56	6	154	38	165	93	134	246	94	104	28	19	74	19	23	17	106	167	88	17	10	129	32	84	134	37	14	40	115
ENSMUSG00000002963	0	0	0	0	0	0	0	0	0	0	0	0	0	0	0	0	3	0	1	0	0	0	0	0	0	0	0	0	0	0	0	0	0	0	0	0	0	0	0	0	6	0	0	0	0	0	0	0	0
ENSMUSG00000002968	1043	1098	1125	877	1142	1122	1621	934	934	994	941	829	900	995	780	925	962	1250	445	1406	846	782	1235	1191	1435	1088	1269	2166	1176	1612	1613	986	1595	1310	780	1090	867	945	1153	1236	1261	617	1451	1676	833	653	1005	795	412
ENSMUSG00000002980	1	1	1	1	1	1	1	1	1	1	1	1	1	1	1	1	1	1	1	1	1	1	1	1	1	1	1	1	1	1	1	1	1	1	1	1	1	1	1	1	1	1	1	1	1	1	1	1	0
ENSMUSG00000002981	1353	978	1949	785	653	864	999	943	1048	408	330	433	379	1468	1556	1296	1523	2327	1260	840	1194	1061	1249	1390	1339	1568	1428	915	1373	787	875	767	878	620	678	742	1259	1790	1274	747	421	517	603	768	801	890	749	715	914
ENSMUSG00000002983	35	47	18	104	65	69	83	81	57	88	76	68	50	49	61	33	80	48	42	47	16	101	61	62	90	79	90	124	160	61	109	109	109	73	66	72	83	119	52	75	108	128	71	73	68	64	41	74	92
ENSMUSG00000002984	2	5	27	2	4	8	2	5	8	2	14	4	13	2	1	17	1	1	1	24	1	1	18	4	7	4	7	32	2	46	1	11	6	2	1	2	35	1	6	1	36	3	6	13	14	5	15	12	129
ENSMUSG00000002985	17	26	1	2	21	3	1	2	16	3	4	2	2	2	0	2	4	9	1	6	3	4	3	12	32	26	5	17	4	8	18	13	8	59	15	85	7	13	12	1	5	9	3	1	1	1	3	3	4
ENSMUSG00000002992	0	0	0	0	0	0	0	0	0	0	0	0	0	0	0	0	0	0	0	0	0	0	0	0	0	0	0	0	0	0	0	0	0	0	0	0	0	0	0	0	0	0	0	0	0	0	0	0	0
ENSMUSG00000002996	1152	926	907	734	641	923	919	959	882	873	939	960	874	1331	903	1146	948	976	1240	1173	852	1295	1090	936	716	693	843	835	821	867	556	742	744	901	752	473	1016	797	861	631	1040	609	676	581	1082	810	718	1022	903
ENSMUSG00000002997	440	507	588	495	483	469	404	509	508	503	525	443	543	716	613	594	890	849	854	526	445	610	569	524	391	328	383	376	361	316	270	302	254	272	265	340	317	328	222	239	302	387	299	314	389	441	375	361	325
ENSMUSG00000003031	7	24	15	13	22	10	22	19	11	28	34	25	20	12	15	19	12	25	13	19	42	37	26	30	28	20	29	14	24	28	27	21	16	41	26	44	15	24	52	34	13	15	30	34	15	28	45	36	2
ENSMUSG00000003032	441	306	268	220	255	192	439	528	497	379	329	367	752	954	1228	566	991	934	1434	585	1790	1390	1682	1119	396	567	589	481	294	396	267	671	429	395	303	297	1549	835	1993	817	1222	730	933	747	707	1200	1444	2621	426
ENSMUSG00000003033	820	719	836	689	488	962	752	778	808	582	720	876	653	828	662	887	904	776	778	699	660	692	596	873	714	727	844	764	913	627	838	642	558	683	712	876	975	781	874	585	828	873	548	624	1245	797	593	649	704
ENSMUSG00000003037	49	92	84	19	83	58	62	53	78	26	26	52	90	178	97	37	76	113	83	100	45	140	106	106	81	56	74	75	30	50	211	67	53	77	61	80	36	92	96	76	81	58	67	92	85	55	74	41	81
ENSMUSG00000003038	1	4	1	5	7	3	3	7	3	4	2	9	5	1	1	1	4	4	0	5	0	0	6	5	4	3	2	11	6	1	1	2	8	3	3	4	2	6	1	2	0	1	7	4	2	2	0	7	4
ENSMUSG00000003039	281	198	234	392	304	309	308	234	331	244	314	294	154	337	205	233	263	252	183	204	199	235	263	284	504	292	353	502	349	400	399	278	196	158	236	146	261	342	237	295	384	439	422	410	315	223	267	196	90
ENSMUSG00000003051	5	10	12	7	64	22	44	8	86	55	50	224	225	494	14	11	357	243	156	96	7	151	8	87	14	36	10	4	36	7	12	56	20	101	5	6	164	241	19	58	52	97	130	23	185	10	39	238	78
ENSMUSG00000003053	0	0	0	2	0	1	0	0	2	0	0	0	2	0	0	0	0	3	1	0	1	0	0	0	0	1	0	0	0	0	0	0	0	0	0	2	0	1	0	0	0	0	0	0	1	0	0	0	0
ENSMUSG00000003062	877	1236	1126	1350	1000	739	967	903	979	1039	1197	902	1023	1199	1117	966	1486	1359	1299	943	734	670	605	812	807	1085	920	979	911	918	705	1088	1308	1014	962	1062	683	585	555	644	707	744	908	771	665	692	824	757	669
ENSMUSG00000003068	457	507	432	713	648	436	611	601	534	527	500	427	416	386	274	340	520	434	413	542	339	364	475	494	667	684	622	540	691	512	540	476	586	552	541	654	726	741	599	774	499	457	678	546	469	516	517	690	1291
ENSMUSG00000003070	116	73	155	78	128	138	101	68	128	144	99	129	40	39	53	52	50	90	30	54	70	42	45	59	82	85	97	84	112	99	86	145	106	95	106	113	43	35	46	109	59	74	43	66	56	53	67	35	0
ENSMUSG00000003072	2	1	2	23	1	3	7	3	15	1	31	3	25	1	1	8	6	12	0	1	8	1	1	8	20	6	1	21	1	1	69	18	11	1	3	7	12	26	29	7	23	8	56	18	9	1	15	1	14
ENSMUSG00000003099	102	132	147	239	196	129	168	150	145	116	166	158	86	50	95	140	138	73	72	131	56	82	165	93	119	116	66	103	157	100	130	119	154	149	101	103	85	121	78	98	112	74	86	84	74	97	70	68	38
ENSMUSG00000003119	370	391	452	538	364	438	355	370	523	593	651	486	326	445	507	426	537	443	682	472	432	343	321	401	362	732	542	444	558	511	482	716	663	587	820	606	498	285	449	692	453	343	456	470	390	552	790	544	1151
ENSMUSG00000003123	15	32	21	23	40	28	25	25	24	27	22	4	28	27	46	26	28	66	42	43	49	20	23	52	22	27	12	37	24	9	34	13	27	17	14	34	45	56	38	50	23	23	28	50	14	24	30	81	23
ENSMUSG00000003131	394	289	279	318	428	278	261	208	279	211	276	178	223	340	329	167	262	232	221	274	341	303	360	384	299	433	484	440	458	297	352	298	348	338	328	306	236	266	303	249	252	169	334	350	225	318	328	264	258
ENSMUSG00000003134	3549	3660	3433	3785	3722	4813	4216	4015	3968	4189	3867	3830	3116	2630	2105	2879	3272	3204	2057	3120	3106	2944	2392	4009	4284	4060	3583	4506	4881	3295	3598	4016	3802	3683	3827	3326	3399	3051	2960	3212	4205	3343	3404	3064	4226	3359	3191	2812	271
ENSMUSG00000003135	522	415	445	520	373	368	387	352	341	472	560	460	502	435	353	435	485	438	535	483	364	319	272	435	415	523	316	619	483	466	407	599	497	416	551	540	410	373	350	524	496	553	517	530	416	422	430	424	199
ENSMUSG00000003153	3	6	3	87	2	28	5	6	7	83	3	14	6	6	6	34	29	70	17	22	37	2	4	3	11	83	8	3	5	33	3	4	3	16	4	122	3	77	4	5	3	5	10	3	106	6	14	6	80
ENSMUSG00000003154	45	209	86	27	34	31	52	31	30	35	28	67	7	63	51	41	22	73	28	69	32	99	47	58	83	40	52	86	32	2	31	4	25	47	87	81	6	100	96	59	75	27	18	68	41	46	26	36	0
ENSMUSG00000003161	5	16	5	19	13	43	10	36	11	20	22	25	6	18	17	9	24	15	7	20	14	24	21	18	39	14	27	21	32	20	34	16	23	21	14	27	10	5	16	14	8	18	19	16	12	19	21	16	0
ENSMUSG00000003166	1578	1817	1600	2098	2838	1174	2285	2156	2533	2022	2233	1765	1409	1534	1187	1174	1355	1403	729	1693	1136	1114	1395	1926	2187	1578	1941	2902	2871	1829	2383	2226	2837	1789	2221	2207	1824	2116	1413	1582	1944	1284	1756	2385	1945	1398	1277	1529	100
ENSMUSG00000003178	206	28	42	95	14	56	7	171	131	61	16	51	3	101	44	14	73	62	31	16	27	78	55	18	77	139	29	1	57	71	28	76	11	43	51	119	22	36	55	21	37	55	34	37	36	9	100	81	37
ENSMUSG00000003184	2	30	20	28	33	7	5	30	12	37	7	111	11	1	18	39	3	28	3	2	25	3	5	52	24	38	24	66	60	10	3	21	68	14	11	32	27	51	83	12	69	28	0	62	47	77	22	39	3
ENSMUSG00000003190	1	1	3	1	0	2	1	1	1	0	0	1	1	1	0	1	7	0	6	3	0	8	0	1	1	1	15	3	1	0	0	0	0	0	6	0	0	8	17	6	3	0	1	0	1	12	1	3	8
ENSMUSG00000003198	1	34	40	95	30	6	8	24	27	10	12	0	50	0	41	14	10	12	43	7	11	11	12	45	2	9	0	12	2	13	23	7	30	5	27	18	23	4	42	41	13	34	22	17	15	27	13	2	1
ENSMUSG00000003199	1	0	4	0	5	0	2	1	1	0	1	9	5	0	1	0	0	5	0	0	0	1	0	0	1	1	5	4	9	16	3	0	5	5	0	4	1	0	0	3	6	0	0	1	3	0	14	2	8
ENSMUSG00000003200	2	42	19	4	12	13	8	23	0	12	9	7	142	50	66	71	31	37	63	48	46	13	22	31	31	30	0	13	8	3	9	4	40	19	30	37	24	15	24	40	25	22	10	2	22	33	9	25	202
ENSMUSG00000003206	0	0	0	0	0	0	0	0	0	0	0	0	0	0	0	0	1	0	0	0	0	0	0	0	0	0	0	0	0	0	0	0	0	0	0	0	0	0	0	0	0	0	0	0	0	0	0	0	0
ENSMUSG00000003208	138	163	137	252	254	246	97	323	166	210	287	154	79	209	86	87	42	187	283	93	226	317	24	271	124	164	192	122	180	53	326	255	391	259	312	439	188	50	237	213	37	126	78	160	167	209	289	530	79
ENSMUSG00000003226	535	489	578	554	605	486	419	522	723	488	618	518	752	1009	987	872	992	796	960	794	711	1084	989	970	561	403	566	579	487	547	361	426	553	434	429	472	615	521	593	525	734	674	548	459	369	470	531	398	402
ENSMUSG00000003227	1	5	0	3	1	3	1	0	3	2	0	2	0	2	1	1	0	1	1	3	5	0	0	3	1	0	5	1	0	1	1	1	3	1	2	4	1	1	2	6	4	5	3	3	1	2	1	0	0
ENSMUSG00000003228	263	156	183	117	92	124	116	113	129	198	89	186	63	137	101	87	125	121	76	116	103	57	104	81	141	134	162	169	85	161	158	72	82	101	120	72	108	125	100	111	175	145	140	91	78	75	151	157	262
ENSMUSG00000003233	47	40	46	30	29	49	45	50	37	37	59	42	32	43	34	56	28	51	18	43	61	28	62	46	40	29	30	49	29	31	32	47	57	42	35	71	47	63	69	70	85	61	83	79	66	45	69	37	45
ENSMUSG00000003234	733	347	388	304	179	157	225	223	277	447	97	206	391	38	327	198	114	202	424	169	161	132	341	217	258	347	383	285	175	473	201	220	396	361	414	460	344	352	375	405	218	343	376	263	345	366	268	233	423
ENSMUSG00000003235	12	267	40	14	30	38	44	25	107	45	83	32	133	129	109	826	137	278	80	41	42	50	46	27	10	79	9	271	10	22	21	23	23	18	98	21	29	41	22	21	247	21	25	20	121	16	91	39	192
ENSMUSG00000003269	2	38	2	2	2	2	6	9	21	1	8	10	4	2	41	30	38	2	23	2	6	3	81	16	1	16	0	2	17	34	2	1	2	1	1	1	2	4	11	15	8	18	7	20	6	35	1	5	111
ENSMUSG00000003271	463	29	41	93	22	81	18	91	25	16	14	238	38	40	12	9	94	136	18	81	62	8	122	26	178	42	22	15	18	86	218	27	11	17	12	205	12	7	14	14	158	42	20	11	15	22	21	10	58
ENSMUSG00000003273	122	2	12	3	30	6	27	42	1	23	8	39	4	4	14	0	2	2	1	6	7	1	0	6	28	28	63	51	9	33	31	44	39	13	45	4	0	25	13	14	26	22	22	13	9	34	25	36	15
ENSMUSG00000003279	148	72	50	65	149	80	103	109	100	61	98	73	125	137	106	133	99	93	148	144	186	174	157	150	101	177	192	196	181	161	113	193	202	167	82	152	242	307	313	216	124	209	230	224	153	381	237	179	13
ENSMUSG00000003282	144	227	216	240	165	180	265	210	204	298	265	227	167	199	259	221	248	249	213	112	155	252	286	177	125	234	111	176	118	239	114	222	156	168	221	178	136	114	131	158	161	179	140	93	151	206	200	140	372
ENSMUSG00000003283	7	0	0	0	7	0	3	1	0	0	0	1	2	0	0	0	0	0	0	2	0	0	0	0	0	0	0	0	0	0	0	0	0	0	0	0	0	0	0	0	0	0	0	0	0	0	2	0	0
ENSMUSG00000003299	210	200	223	322	213	185	195	245	211	221	173	158	265	213	195	207	229	320	169	265	167	95	370	227	194	213	198	244	264	210	344	103	181	338	247	361	282	293	217	187	294	319	254	217	272	217	168	192	208
ENSMUSG00000003308	231	133	42	34	45	66	55	57	116	41	23	76	2	36	16	24	17	76	15	11	81	35	12	56	75	69	77	32	87	114	89	86	53	118	47	17	45	54	38	83	26	43	46	33	10	78	94	55	42
ENSMUSG00000003309	99	281	131	209	178	172	204	135	135	211	223	163	83	252	122	148	151	137	122	160	173	183	151	191	167	180	170	225	182	223	215	193	205	296	168	206	151	156	148	158	258	163	134	113	118	131	84	101	79
ENSMUSG00000003316	1162	1536	2614	1338	1963	2005	1577	1879	1961	1616	1109	1214	1507	1926	2283	2309	1868	2230	2215	1804	1565	1285	1318	1709	1105	1012	1405	1467	1444	907	1263	1337	1531	1668	1661	1513	1287	1446	1941	1591	1259	741	1215	1314	963	2078	1203	1156	37
ENSMUSG00000003341	0	0	0	0	0	0	0	0	0	0	0	0	0	0	0	0	0	0	0	0	0	0	0	0	0	0	0	0	0	0	0	0	0	0	0	0	0	0	0	0	0	0	0	0	0	0	0	0	0
ENSMUSG00000003344	883	1021	1078	1066	1268	978	930	847	899	895	743	631	745	854	669	791	874	911	301	755	843	540	786	887	1208	785	741	1121	1418	780	1446	1018	921	780	986	821	818	1273	831	937	1367	1092	901	1071	1153	800	930	814	367
ENSMUSG00000003345	1144	1251	1154	1592	1515	1085	1571	1111	1319	1537	1251	1000	771	1101	1145	1120	1322	1623	754	1354	1004	760	1034	1445	1086	1023	1012	1390	1461	942	1571	1151	1541	986	792	1267	1033	980	955	1223	1374	947	761	1171	1134	978	953	898	382
ENSMUSG00000003346	254	259	93	398	207	143	300	194	219	325	400	267	213	239	136	298	467	148	134	345	95	92	276	209	263	316	272	533	284	459	379	423	323	116	390	379	74	150	204	275	528	233	262	180	235	105	68	175	9
ENSMUSG00000003348	5	28	5	4	3	7	14	1	5	2	3	4	3	4	55	4	4	6	3	3	28	4	5	16	1	2	15	3	1	3	4	1	2	1	14	6	3	7	23	6	1	19	10	1	31	22	12	24	0
ENSMUSG00000003352	158	88	193	123	205	167	95	67	95	13	100	77	84	241	110	164	119	240	236	112	229	110	135	144	87	208	106	150	77	110	208	69	185	258	148	54	184	167	80	113	157	184	173	218	121	290	221	91	290
ENSMUSG00000003354	42	72	70	58	19	53	47	49	55	65	67	64	66	58	72	51	76	99	87	55	49	44	20	35	26	26	25	37	34	44	35	28	40	16	32	30	36	25	26	23	28	19	34	28	15	24	32	20	47
ENSMUSG00000003355	3	4	9	3	3	3	4	4	5	4	3	3	4	4	4	3	11	3	3	3	4	3	2	3	3	4	5	3	3	3	2	4	16	4	4	4	3	2	3	4	3	4	4	3	4	4	5	3	11
ENSMUSG00000003360	0	1	10	0	7	0	0	1	18	1	0	0	1	1	0	0	3	0	0	0	0	0	3	0	0	1	6	0	0	0	12	1	0	1	2	1	15	0	3	1	0	0	1	0	1	2	1	3	1
ENSMUSG00000003363	119	28	5	11	182	14	120	53	8	47	95	7	262	14	455	181	109	44	234	8	29	158	11	32	35	29	39	49	6	7	5	20	4	3	18	3	10	225	4	97	17	40	76	63	34	148	28	61	53
ENSMUSG00000003378	1	3	1	1	1	5	1	1	1	1	1	1	1	1	1	1	1	3	1	1	1	1	1	1	1	1	1	21	1	1	1	1	1	1	1	1	1	1	1	7	1	1	1	1	1	1	1	1	0
ENSMUSG00000003379	8	6	5	9	6	12	5	5	5	5	6	7	9	10	7	6	6	5	5	40	4	6	6	5	4	3	3	18	5	7	6	5	5	5	4	5	6	6	5	4	3	13	15	4	4	5	5	5	0
ENSMUSG00000003380	497	371	339	387	608	370	518	566	453	476	471	472	485	531	428	541	535	563	547	717	539	525	541	799	744	680	827	865	991	638	655	823	900	579	618	479	628	699	720	799	731	562	622	1009	625	654	718	845	223
ENSMUSG00000003382	3	4	6	4	4	4	4	4	4	16	5	5	5	18	20	5	24	18	6	4	5	4	4	10	26	4	18	3	3	4	3	5	14	33	5	5	4	11	4	5	20	4	4	3	4	5	5	5	7
ENSMUSG00000003402	40	66	16	34	26	25	30	8	28	43	78	28	85	8	60	24	63	3	11	59	38	4	17	40	89	41	36	46	48	23	36	6	42	14	42	80	64	80	0	83	165	41	35	31	29	2	33	15	0
ENSMUSG00000003410	2578	2331	3029	2343	1735	2680	2205	2927	2316	2444	1722	2159	2140	3339	3409	2880	2259	3267	2642	2750	3657	4191	3182	3890	2015	2440	1984	2275	2014	2046	2060	2565	2523	3603	2092	2846	4525	3485	4913	3489	2966	3139	3722	3560	3326	5920	3328	3045	454
ENSMUSG00000003411	0	0	3	0	5	4	5	0	0	8	0	0	16	12	5	3	0	5	7	3	3	6	3	5	0	5	0	12	0	0	0	0	1	1	2	21	19	15	12	5	0	9	6	7	17	2	3	2	3
ENSMUSG00000003418	24	49	68	47	58	44	54	42	56	38	68	66	23	41	16	21	42	20	23	33	21	21	6	25	15	15	42	27	19	27	33	41	34	30	37	27	15	20	7	25	14	21	32	21	19	19	23	14	33
ENSMUSG00000003420	2	1	0	1	1	1	1	1	1	1	1	1	1	1	1	1	0	0	9	1	1	1	10	1	2	1	1	2	2	1	1	1	1	1	1	1	15	1	1	1	1	1	1	1	1	1	1	1	9
ENSMUSG00000003421	232	70	147	39	246	74	257	159	7	65	69	13	38	54	266	39	83	6	17	103	54	94	107	12	197	84	81	221	121	16	524	36	52	7	74	49	102	175	8	257	90	120	79	165	293	178	117	85	131
ENSMUSG00000003423	281	2	103	6	65	7	47	30	19	22	4	10	189	6	87	5	11	53	46	19	23	9	144	9	40	14	35	104	37	4	100	26	51	57	3	22	28	6	9	44	14	34	65	91	40	37	11	34	73
ENSMUSG00000003429	313	279	115	212	402	387	352	404	488	454	555	604	386	248	255	325	190	180	243	295	568	392	315	374	389	411	447	751	364	571	383	336	532	349	369	461	585	657	541	723	332	298	415	656	347	513	255	379	208
ENSMUSG00000003435	146	107	94	152	279	124	373	169	199	212	248	248	143	126	126	93	152	71	119	194	224	46	148	131	317	205	259	436	320	246	321	272	276	218	192	160	285	362	292	301	364	236	264	350	288	164	120	271	159
ENSMUSG00000003436	6	17	58	31	30	23	24	20	5	9	15	1	121	5	3	50	13	18	51	15	18	8	13	66	28	5	94	55	11	52	26	2	40	65	31	10	43	18	108	57	30	24	28	12	3	23	4	7	7
ENSMUSG00000003437	109	139	110	232	83	94	236	136	100	75	80	186	71	34	46	40	26	34	12	67	175	167	197	71	116	152	174	156	136	281	214	161	256	273	113	162	108	198	293	150	105	252	150	110	166	145	100	211	210
ENSMUSG00000003438	7	36	8	202	5	34	41	53	32	32	109	55	118	13	10	8	9	91	6	35	22	78	52	4	15	63	35	76	33	7	37	62	19	4	39	25	45	154	15	3	81	43	47	59	57	74	42	61	35
ENSMUSG00000003444	16	24	160	21	14	35	20	23	26	20	17	17	25	27	18	14	14	13	57	14	16	14	11	17	18	24	26	15	17	35	71	18	15	21	19	21	16	9	91	43	62	21	19	16	69	24	27	49	239
ENSMUSG00000003452	0	0	0	0	0	0	0	0	0	0	0	0	5	5	6	0	6	2	0	0	6	0	0	2	0	0	0	0	0	0	0	0	0	0	2	0	0	0	1	0	0	1	0	0	0	2	0	0	0
ENSMUSG00000003458	243	228	329	313	190	180	238	239	255	308	267	222	297	319	245	344	384	303	252	316	176	276	313	287	186	154	160	169	202	127	118	100	144	135	128	146	135	177	121	205	204	160	191	158	195	178	162	116	85
ENSMUSG00000003464	57	51	46	59	47	34	75	45	40	22	15	119	49	38	9	17	26	30	99	44	34	54	39	44	70	54	65	64	56	95	175	67	69	46	62	59	39	90	70	55	73	71	23	85	72	29	49	34	152
ENSMUSG00000003469	0	1	1	0	1	1	1	1	1	1	1	1	1	1	1	0	3	1	1	1	1	1	0	1	1	1	1	1	1	1	0	1	1	1	1	1	1	0	1	1	1	1	1	1	1	1	1	1	0
ENSMUSG00000003477	0	0	0	0	0	0	0	0	0	0	0	0	0	0	0	0	0	0	0	0	0	0	0	0	0	0	3	0	0	0	0	0	0	0	0	0	0	0	0	0	0	0	0	0	0	0	0	0	0
ENSMUSG00000003484	0	0	0	0	0	0	0	0	0	0	0	0	8	0	7	0	2	0	0	0	0	0	26	0	0	0	0	0	0	0	0	0	0	0	0	0	0	0	0	0	2	0	0	0	0	0	3	0	0
ENSMUSG00000003500	109	10	73	83	22	38	101	59	418	10	11	12	136	14	160	145	10	102	165	137	132	11	11	192	18	16	88	10	61	97	129	48	127	131	7	9	215	470	10	56	16	121	16	437	176	53	192	10	171
ENSMUSG00000003505	0	0	0	0	0	0	0	0	0	0	0	0	0	0	0	0	0	1	0	0	1	0	0	0	0	0	0	0	0	0	0	0	0	0	0	0	0	0	0	0	0	0	0	0	0	0	0	0	0
ENSMUSG00000003518	0	0	0	0	0	0	0	0	0	0	0	0	0	0	0	0	0	2	0	0	0	0	0	0	0	0	0	0	0	0	0	0	0	0	0	0	0	0	0	0	0	0	0	0	0	0	0	0	0
ENSMUSG00000003526	482	23	68	2	198	108	119	47	153	40	107	15	174	133	94	112	3	92	36	33	108	34	146	136	101	82	56	104	181	92	241	156	37	46	42	111	110	115	5	105	105	88	41	26	42	50	63	77	42
ENSMUSG00000003527	161	95	5	55	102	80	91	128	87	172	156	288	200	16	120	342	141	79	8	152	94	26	268	41	162	147	91	86	76	173	220	101	47	174	103	31	84	217	138	53	263	357	240	161	108	79	99	286	142
ENSMUSG00000003528	17	29	111	30	5	2	26	2	7	4	5	14	70	76	9	66	73	146	376	8	71	39	221	54	68	44	15	115	7	6	5	24	3	3	2	32	4	74	4	20	24	25	15	25	3	6	54	34	35
ENSMUSG00000003531	137	2	3	31	11	21	15	7	30	28	38	3	3	5	24	11	4	6	6	43	15	2	2	8	89	6	31	16	30	18	67	44	37	36	3	57	23	10	7	27	0	24	24	32	15	1	31	6	89
ENSMUSG00000003534	359	411	281	260	341	385	420	325	296	417	416	407	284	354	346	330	250	424	194	356	401	380	411	390	413	254	428	577	393	404	241	350	523	343	236	656	381	446	488	442	396	344	469	611	338	548	353	340	46
ENSMUSG00000003541	1	1	2	2	5	2	8	1	1	2	2	2	2	2	3	2	6	2	3	2	2	2	2	2	1	1	7	1	3	2	1	2	15	2	2	20	2	2	2	2	8	1	1	1	1	29	2	2	76
ENSMUSG00000003545	97	100	75	83	125	85	100	85	64	118	120	137	38	95	64	132	136	136	66	75	32	12	31	62	80	91	67	75	113	69	42	36	87	50	101	74	31	39	29	60	41	42	46	68	12	30	40	40	52
ENSMUSG00000003546	24	19	14	95	8	59	3	60	5	39	12	43	21	0	4	4	43	3	1	9	19	23	51	12	7	35	21	7	11	21	5	10	46	50	10	14	4	18	45	1	41	4	21	30	40	41	43	31	35
ENSMUSG00000003549	2	11	6	2	2	5	21	24	8	28	13	26	27	9	1	1	7	14	15	20	1	2	2	1	29	1	1	37	16	4	10	32	53	6	17	20	28	2	90	9	1	35	16	2	31	1	1	3	36
ENSMUSG00000003555	0	0	0	0	0	0	0	0	0	0	0	0	0	3	0	0	0	0	0	0	0	0	0	0	0	0	0	0	0	0	0	0	0	0	0	0	0	0	0	0	0	0	0	0	0	0	0	0	0
ENSMUSG00000003559	1	1	0	1	0	0	0	0	0	0	7	9	1	2	15	0	0	0	0	0	5	0	1	0	8	0	3	0	0	1	0	0	0	0	0	0	0	2	0	1	9	18	6	0	1	5	0	2	5
ENSMUSG00000003573	0	0	0	0	0	0	0	0	0	0	0	0	0	0	0	0	1	0	0	6	0	0	0	0	0	0	0	0	0	0	0	0	0	0	0	0	0	0	0	0	0	0	0	0	0	0	0	0	0
ENSMUSG00000003575	311	208	203	197	231	234	264	223	163	143	174	90	163	75	86	151	272	213	87	159	198	131	187	185	241	158	256	262	274	262	372	170	303	243	166	228	187	206	135	181	229	167	156	300	109	163	157	138	67
ENSMUSG00000003581	389	575	686	604	641	679	402	488	350	427	854	610	731	342	545	589	409	436	208	579	400	208	264	356	404	419	430	467	285	476	445	892	720	493	608	739	356	329	264	611	285	302	489	493	277	307	219	293	0
ENSMUSG00000003585	3	11	0	30	27	22	15	17	10	16	16	2	11	16	23	4	9	1	13	8	10	20	17	13	13	22	8	15	20	6	15	23	4	7	25	1	13	43	57	30	38	11	28	13	10	11	10	25	1
ENSMUSG00000003604	206	80	155	332	212	156	211	140	80	141	110	51	187	89	114	229	140	107	347	82	44	44	107	95	266	257	174	184	241	143	112	173	167	225	136	366	147	127	42	147	147	121	323	139	217	124	118	180	993
ENSMUSG00000003617	0	0	0	0	0	0	0	0	0	0	0	0	0	0	0	0	0	1	0	0	0	0	0	0	0	0	0	0	0	0	0	0	0	0	0	0	0	0	0	0	0	0	0	0	0	0	0	0	0
ENSMUSG00000003623	38	7	54	29	9	3	27	11	15	16	7	8	14	5	0	1	18	27	45	15	6	6	16	12	16	19	18	7	6	41	3	12	24	20	19	11	7	5	5	29	6	1	5	3	11	0	6	5	42
ENSMUSG00000003644	43	84	122	160	45	61	167	99	22	71	26	92	30	4	47	29	34	57	5	46	62	207	83	78	118	134	101	230	221	109	132	40	53	223	76	86	29	50	65	67	65	31	47	31	41	69	73	43	28
ENSMUSG00000003657	0	0	0	0	0	0	0	0	3	0	0	0	4	2	2	0	2	0	0	0	4	0	0	0	0	3	0	3	4	0	0	0	5	15	0	2	0	9	1	0	14	2	0	4	0	0	1	1	0
ENSMUSG00000003660	369	438	222	481	274	300	331	397	216	224	336	341	431	336	226	393	334	307	327	327	296	297	374	295	547	312	360	406	450	383	442	278	205	207	213	157	471	331	248	218	496	371	244	248	354	222	305	208	96
ENSMUSG00000003662	123	99	103	110	158	120	119	136	91	156	157	123	103	179	73	101	132	137	97	91	82	112	158	143	119	168	149	120	130	99	184	127	84	81	93	97	96	186	212	132	70	81	125	109	99	175	94	111	65
ENSMUSG00000003665	0	0	0	0	0	0	0	0	0	0	0	0	0	0	0	0	1	1	0	0	0	0	0	0	0	0	0	0	0	0	0	0	0	0	0	0	0	0	0	0	0	0	0	0	0	0	0	0	0
ENSMUSG00000003680	0	4	4	12	59	24	24	14	10	23	11	18	116	18	28	16	12	17	9	36	21	20	19	50	22	8	8	53	23	19	33	35	41	37	16	19	40	26	2	34	28	25	38	89	30	46	4	17	0
ENSMUSG00000003721	12	3	15	4	6	8	5	10	14	6	10	5	17	4	13	10	7	11	4	6	18	5	9	10	6	8	17	16	7	8	2	6	7	11	6	17	11	2	6	15	2	14	0	9	3	7	1	7	27
ENSMUSG00000003731	879	688	714	926	739	854	644	561	913	817	840	1062	706	824	681	662	680	581	553	780	805	707	970	740	819	639	533	1007	637	822	1012	703	836	873	545	713	928	892	1076	656	944	913	776	631	858	888	786	391	507
ENSMUSG00000003746	13	25	17	14	16	20	12	17	15	20	15	11	25	50	35	29	28	50	33	21	21	18	12	17	7	5	4	7	10	6	3	10	6	7	13	6	4	4	5	12	7	8	7	10	19	9	15	11	22
ENSMUSG00000003752	10	13	15	13	13	12	13	13	14	14	14	14	13	15	18	15	29	29	17	14	15	15	13	14	11	12	13	49	11	13	11	14	12	14	13	14	14	11	13	15	12	15	15	12	14	15	16	30	64
ENSMUSG00000003762	2	60	60	8	3	2	23	17	1	25	22	3	2	137	4	3	39	10	8	3	19	103	9	10	8	32	27	16	1	33	46	29	2	1	15	1	13	175	97	3	78	35	34	35	101	44	46	17	18
ENSMUSG00000003778	895	921	1028	1051	1070	759	1175	1135	957	1008	1363	1366	1008	694	889	949	1030	823	915	1101	772	1116	1022	905	938	716	728	1128	1106	739	986	637	661	632	669	640	853	962	671	870	869	543	804	845	842	606	585	671	359
ENSMUSG00000003779	1051	1117	1175	1285	1089	1206	1030	1122	999	971	910	1332	1003	1106	1301	1125	839	1111	1025	1042	1323	1254	1346	1062	915	802	723	1038	972	670	997	548	818	789	564	767	1120	1142	1035	1046	846	941	807	923	1029	1206	746	936	241
ENSMUSG00000003808	147	166	70	128	196	158	149	175	172	149	118	173	167	92	80	94	113	65	49	122	156	83	129	146	143	132	136	163	310	125	316	178	206	162	95	204	114	186	209	129	155	132	76	191	150	92	129	200	55
ENSMUSG00000003809	46	134	62	88	23	28	63	102	164	54	83	41	69	60	2	38	73	68	55	68	45	154	28	26	103	51	70	99	69	96	107	82	84	16	26	122	32	116	73	41	123	62	75	78	20	37	2	74	101
ENSMUSG00000003810	871	579	981	509	674	719	275	466	353	201	376	526	276	644	299	287	324	559	277	371	447	584	203	743	438	384	288	657	578	662	1316	874	693	465	571	512	326	432	185	418	614	640	609	433	670	306	736	210	1508
ENSMUSG00000003812	0	0	0	0	0	0	0	0	0	0	0	0	0	0	0	0	0	0	0	0	0	0	0	0	0	0	0	0	0	0	0	0	0	0	0	0	0	0	0	0	0	0	0	0	0	0	0	0	0
ENSMUSG00000003813	0	0	0	5	0	3	1	0	5	3	0	2	1	0	0	4	1	0	9	4	0	0	0	2	0	1	0	0	3	0	0	0	10	0	0	0	0	0	8	0	0	0	0	0	0	3	0	0	0
ENSMUSG00000003814	190	432	329	322	399	390	348	431	262	382	355	416	433	587	364	319	345	295	357	300	477	320	368	464	336	252	290	363	231	335	436	281	335	398	330	273	268	327	459	457	272	403	475	296	208	306	294	461	849
ENSMUSG00000003824	3250	3359	2550	2628	2370	2889	3321	3059	2839	2458	3306	3257	1970	2567	2263	2415	2292	2433	2655	2328	2777	2322	1855	2900	3549	3240	3655	4522	3072	3677	3612	3041	2851	3444	2651	3444	2580	2453	2956	2699	3224	2421	2485	2929	2021	1993	2723	2531	2426
ENSMUSG00000003847	28	0	17	37	22	9	32	17	30	7	30	18	47	35	29	39	20	23	22	39	22	28	31	32	8	11	9	26	6	16	15	9	10	14	12	6	14	27	13	20	38	25	37	37	25	32	19	16	57
ENSMUSG00000003848	33	411	155	61	194	105	193	105	120	211	196	260	156	217	329	207	177	222	104	171	113	182	155	89	358	299	250	154	164	234	93	138	208	157	110	444	129	170	88	97	110	44	129	279	130	59	226	73	372
ENSMUSG00000003849	288	187	238	281	208	270	227	297	351	253	387	318	196	133	161	214	279	260	172	318	145	218	96	308	214	275	322	229	250	346	269	334	390	275	250	300	169	141	202	154	148	133	200	263	198	201	261	216	62
ENSMUSG00000003863	0	0	2	0	0	0	0	0	0	0	0	0	0	0	0	3	0	0	0	0	0	0	0	0	0	0	0	0	0	0	0	0	0	0	0	3	0	0	0	0	0	0	0	0	0	0	0	0	0
ENSMUSG00000003865	130	476	723	420	205	328	163	387	326	373	255	331	223	257	168	259	212	147	122	226	434	304	345	344	241	297	203	240	221	100	382	333	722	554	378	507	322	261	422	418	184	251	287	194	64	324	474	284	293
ENSMUSG00000003868	73	148	114	164	27	159	84	70	35	66	40	81	146	182	132	91	107	118	101	85	171	149	89	59	37	29	67	49	45	28	121	99	33	38	74	81	91	122	85	124	176	175	141	79	178	103	34	79	349
ENSMUSG00000003872	1	1	1	1	1	1	1	1	1	1	1	1	1	1	1	1	1	1	1	1	1	1	1	1	1	1	1	1	1	1	1	1	1	1	1	1	1	1	1	1	1	1	16	1	1	1	1	1	0
ENSMUSG00000003873	11	1	22	31	11	10	25	19	20	22	21	18	56	2	18	21	9	9	0	8	5	0	0	3	18	6	20	14	8	1	50	41	12	32	6	32	34	9	4	17	9	25	16	16	1	7	0	2	11
ENSMUSG00000003882	0	0	0	0	0	0	0	0	0	0	0	0	3	0	0	0	0	0	0	0	0	0	0	0	0	0	0	0	0	0	1	0	0	0	0	0	0	0	0	0	3	0	0	0	0	0	0	0	0
ENSMUSG00000003923	3	14	2	8	15	5	26	7	17	14	26	19	13	1	5	4	21	18	15	7	5	2	1	14	15	7	5	7	15	3	1	27	13	4	33	2	16	2	5	0	13	3	14	20	16	5	11	7	0
ENSMUSG00000003929	49	65	25	106	57	69	33	37	36	65	57	76	41	74	59	50	50	77	60	69	54	47	88	60	85	49	47	37	45	48	49	23	47	24	31	31	110	42	64	50	26	50	41	35	58	46	39	21	15
ENSMUSG00000003934	0	0	0	0	0	0	0	0	0	0	0	0	0	0	0	0	0	0	0	0	0	0	0	0	0	0	0	0	0	0	0	0	0	0	0	0	0	0	0	0	0	0	0	0	0	0	0	0	0
ENSMUSG00000003948	32	32	23	35	43	28	48	22	76	25	25	27	29	57	32	31	39	23	35	23	56	40	61	51	39	52	36	28	35	38	50	28	54	29	35	13	35	32	50	33	36	53	24	40	50	44	32	50	22
ENSMUSG00000003949	3	3	3	3	3	3	2	30	56	26	32	3	3	3	156	3	47	3	4	3	3	8	8	11	11	2	32	3	2	3	3	3	10	3	9	10	15	3	3	42	2	2	67	3	2	3	3	16	0
ENSMUSG00000003955	0	9	0	0	6	2	1	2	8	1	2	9	0	0	5	0	6	1	3	0	0	2	0	0	2	9	0	3	7	6	0	0	5	0	3	6	4	3	0	0	13	8	7	0	4	4	12	6	15
ENSMUSG00000003970	504	444	374	336	346	400	420	487	654	206	457	415	200	137	424	307	223	23	317	289	409	237	280	519	517	554	688	653	573	355	551	476	497	708	436	649	889	893	811	646	339	376	565	737	588	513	303	504	715
ENSMUSG00000003974	1	0	0	0	5	11	0	0	6	4	0	0	25	0	0	0	21	9	0	0	0	0	0	0	0	0	5	0	6	0	0	0	0	7	1	0	0	0	0	0	0	0	0	0	0	0	2	6	0
ENSMUSG00000003992	781	865	942	1026	942	932	907	1210	938	989	1129	1072	837	652	630	758	712	815	645	906	734	784	544	683	927	913	853	1067	899	1078	884	977	1213	1028	898	977	656	923	834	806	887	741	790	1064	714	1019	801	741	417
ENSMUSG00000004018	11	6	3	36	2	9	0	19	13	13	9	10	19	0	5	20	1	6	0	4	10	3	6	5	1	18	2	4	2	5	5	11	1	1	11	10	16	4	1	8	7	14	10	6	4	0	12	4	6
ENSMUSG00000004031	0	0	0	0	0	0	0	1	0	3	0	3	0	0	0	0	0	0	1	0	0	0	0	0	0	0	0	0	0	0	0	2	0	0	0	0	0	0	0	2	0	6	0	0	0	0	0	11	1
ENSMUSG00000004032	1210	1317	1803	875	1599	1121	1655	1672	1698	1210	1554	1205	2476	1050	1699	1908	1961	1512	1782	1810	2041	2731	1897	1785	1804	2337	2586	1744	1704	1697	1647	1695	2059	1499	2021	1458	1350	1284	1314	1540	866	892	917	1597	1276	1560	1349	1036	343
ENSMUSG00000004035	2	1	0	2	1	5	0	10	0	0	1	1	1	2	1	2	1	0	2	0	2	1	1	0	0	0	0	10	1	1	1	0	0	0	0	0	1	1	1	0	1	7	0	0	0	0	0	0	0
ENSMUSG00000004038	0	0	0	0	0	0	0	0	0	0	0	0	0	0	0	0	1	0	0	0	0	0	0	0	0	0	0	0	0	0	0	0	0	0	0	0	0	0	0	0	0	0	0	0	0	0	0	0	0
ENSMUSG00000004040	1438	1172	1461	1207	1420	1266	1239	1286	1236	1364	1188	958	1035	1686	1121	1450	1403	1341	1292	1243	1408	1347	1267	1666	1023	1080	1016	1381	1280	1022	932	884	1361	1202	1174	1195	1316	1278	1087	1657	1317	1310	1313	1284	1065	1727	1213	1092	283
ENSMUSG00000004043	47	163	84	150	101	113	81	134	51	68	79	77	51	134	86	69	87	132	133	162	71	117	118	75	132	90	144	90	158	110	114	91	114	90	99	107	131	101	148	128	152	140	168	235	102	192	114	83	43
ENSMUSG00000004044	2	7	6	29	4	5	4	37	4	4	14	4	6	3	5	5	27	24	7	5	7	5	4	10	3	20	4	15	48	58	49	48	14	4	5	15	4	3	4	11	11	30	6	4	5	15	11	11	19
ENSMUSG00000004054	62	138	292	137	153	189	282	297	192	269	298	189	250	202	262	59	221	422	100	111	114	167	288	360	315	452	266	284	389	216	187	84	283	158	290	181	328	296	208	110	296	147	96	336	288	231	219	546	92
ENSMUSG00000004056	295	355	263	262	330	237	376	324	216	250	262	209	215	261	498	303	304	356	246	347	273	383	407	434	322	340	312	305	357	217	257	161	343	282	158	301	366	390	331	292	319	248	243	322	338	267	274	293	142
ENSMUSG00000004069	224	88	105	177	129	222	171	156	206	111	176	131	192	212	256	103	133	162	225	176	113	290	120	155	213	145	159	190	286	117	212	118	134	173	144	241	242	227	221	174	250	206	186	172	243	193	176	215	232
ENSMUSG00000004070	6	15	26	33	40	10	57	37	22	50	21	78	3	3	11	1	17	17	1	9	3	1	14	6	2	6	15	20	33	59	50	17	47	2	19	30	1	15	1	23	3	28	52	1	19	44	57	6	119
ENSMUSG00000004071	1324	1237	1114	1125	1237	1116	938	1259	1022	780	1171	821	612	601	543	798	813	646	279	883	699	578	413	619	993	763	707	1020	929	928	1200	1029	913	1347	623	1125	515	827	635	571	767	631	726	604	744	756	645	542	555
ENSMUSG00000004085	11	22	17	38	21	30	18	13	27	28	24	21	13	28	6	16	23	27	16	21	22	26	13	24	38	46	20	26	48	42	17	29	18	33	36	48	18	46	6	35	33	31	27	18	20	27	14	8	0
ENSMUSG00000004096	1183	1435	1238	1513	1605	1436	1977	1796	1395	1600	2014	1906	1488	1344	1449	1272	1766	1435	1486	1628	1103	1453	1172	1586	1665	1277	1438	1855	1592	1457	1432	1345	1656	1567	1255	1414	1306	1464	1274	1148	1562	1190	1434	1744	1292	1575	1315	1280	1049
ENSMUSG00000004098	0	0	0	0	0	0	0	0	0	0	0	0	0	0	0	0	0	0	0	0	0	0	0	0	0	0	0	0	0	0	0	0	0	0	0	0	0	0	0	0	0	0	0	0	0	0	0	0	0
ENSMUSG00000004099	549	443	1034	756	861	557	631	819	771	1175	1055	1090	1370	1924	1945	2111	1622	1320	1156	1758	2171	1368	1742	1512	399	1024	714	789	672	562	548	807	1249	1049	1331	1243	2240	1167	1748	1620	1480	1346	2746	1626	1138	1471	1528	1327	251
ENSMUSG00000004100	1108	1053	905	1267	1266	1182	1171	1121	1002	1092	1165	1092	1012	1415	1053	1051	1116	1152	602	1303	1222	1067	1312	1559	1369	1010	1210	1584	1351	1185	1965	1216	1425	1329	932	1105	1446	1250	1430	1424	1323	1054	973	1350	1034	953	633	1055	272
ENSMUSG00000004105	876	1281	1378	866	1619	1137	1286	1136	1484	1076	1279	1604	1374	2076	2157	957	1339	1767	888	1595	1138	1879	1848	1525	1574	756	1388	1826	1254	1064	950	1145	1302	1020	774	832	1470	1281	2019	1381	1615	1115	1326	1083	1478	1938	1174	1374	1079
ENSMUSG00000004110	0	0	5	2	4	0	0	3	0	0	1	0	2	0	14	5	2	4	5	1	3	1	4	0	0	11	0	11	4	0	2	0	0	0	0	0	1	7	1	18	4	2	8	9	8	0	6	0	0
ENSMUSG00000004113	0	0	4	11	9	1	1	5	2	2	3	3	0	4	11	1	0	1	0	0	1	0	0	3	7	0	2	0	3	9	8	3	4	3	11	7	2	3	0	0	1	2	3	3	15	2	0	2	6
ENSMUSG00000004127	57	73	31	84	50	68	105	67	64	65	77	54	38	7	24	67	3	2	43	55	53	53	58	74	63	37	68	53	77	77	87	93	101	198	84	197	112	58	134	140	25	60	103	192	53	125	138	109	60
ENSMUSG00000004151	68	89	116	79	77	87	80	56	119	62	82	35	139	61	56	62	90	120	104	84	112	51	53	110	59	99	75	88	78	115	45	122	157	176	133	120	75	41	89	148	39	51	137	111	66	82	135	188	60
ENSMUSG00000004187	6	43	12	6	4	7	3	3	3	3	4	4	6	6	4	3	16	2	2	10	21	8	9	3	7	2	2	38	8	53	4	6	3	3	2	3	4	5	3	2	7	17	7	17	2	7	22	3	0
ENSMUSG00000004207	128	194	91	232	172	117	127	135	96	105	72	87	95	220	112	134	93	162	88	130	138	279	209	198	176	63	101	160	87	99	170	81	178	90	76	112	165	262	143	183	122	119	159	232	151	136	19	90	23
ENSMUSG00000004221	6	3	59	18	6	58	28	51	11	110	54	13	14	203	7	6	19	10	6	86	37	153	9	86	3	15	30	68	8	6	6	3	20	3	2	3	6	84	4	3	36	5	3	24	47	108	45	47	1
ENSMUSG00000004231	2	0	4	4	0	1	10	4	3	0	0	1	1	0	9	1	6	1	3	2	3	0	1	0	2	2	1	5	1	9	0	7	3	1	4	3	0	0	5	7	5	3	0	5	2	7	0	1	0
ENSMUSG00000004233	22	14	23	45	18	27	36	32	53	23	20	32	6	13	20	22	22	21	8	9	11	15	13	22	23	47	28	31	20	31	49	27	36	57	32	37	8	20	26	23	23	18	17	19	16	24	29	19	36
ENSMUSG00000004263	22	2	2	3	2	13	4	3	13	1	2	22	3	4	3	13	3	2	2	1	1	2	4	1	6	0	7	1	16	5	41	30	1	28	3	1	4	2	1	20	17	16	14	25	24	18	31	44	16
ENSMUSG00000004264	384	249	410	146	215	261	246	219	205	187	170	226	281	274	179	272	282	304	214	209	279	146	228	244	268	259	169	314	302	173	274	213	280	268	217	417	181	185	278	189	310	144	160	196	256	136	232	232	285
ENSMUSG00000004266	18	22	40	27	11	8	16	35	19	46	3	9	19	0	19	13	40	4	21	17	34	20	2	9	48	8	14	27	68	11	25	33	11	49	42	29	12	22	22	37	17	21	15	11	24	32	46	11	36
ENSMUSG00000004267	0	0	0	0	0	0	0	0	0	0	0	0	0	0	0	0	0	0	0	0	0	0	0	0	0	0	0	0	0	0	0	0	0	0	0	0	0	0	0	0	0	0	0	0	0	0	0	0	0
ENSMUSG00000004268	67	50	103	155	181	72	226	195	90	172	171	86	186	130	112	109	111	98	172	131	145	125	93	103	133	203	32	176	173	117	52	167	201	107	152	206	207	148	219	240	260	182	226	218	192	198	196	116	199
ENSMUSG00000004270	1	0	0	0	3	5	0	0	0	1	11	0	1	17	0	0	6	4	1	2	1	0	26	0	1	0	0	11	0	0	0	0	12	12	0	0	0	0	0	0	0	17	6	7	12	0	9	0	81
ENSMUSG00000004285	219	216	256	303	88	219	190	230	152	208	286	155	239	45	138	192	165	96	247	183	168	136	92	135	270	138	237	208	279	147	198	239	140	122	233	208	82	149	103	131	157	153	56	221	158	148	53	218	27
ENSMUSG00000004296	71	124	313	165	235	65	144	145	253	87	113	74	145	286	191	204	168	134	187	158	173	179	117	201	85	140	43	73	79	113	73	109	133	81	94	166	120	108	101	215	205	212	133	92	144	143	298	154	0
ENSMUSG00000004317	514	386	534	409	540	521	511	446	523	500	541	657	541	463	392	409	521	673	500	468	419	443	328	517	310	382	398	363	356	402	378	518	358	343	451	394	241	406	312	362	325	354	453	324	508	334	703	302	341
ENSMUSG00000004319	147	185	167	166	131	213	160	179	236	182	157	199	182	116	138	117	129	99	118	155	149	184	161	128	199	173	193	192	205	164	153	215	234	218	222	208	89	98	113	146	124	111	139	140	144	134	184	153	102
ENSMUSG00000004328	165	129	115	204	56	135	82	63	76	59	95	134	157	123	54	145	128	180	151	97	94	142	41	69	58	75	70	106	54	107	120	33	106	76	51	60	114	154	76	151	343	230	330	112	355	149	135	158	204
ENSMUSG00000004341	15	38	28	3	10	25	2	4	60	19	9	69	33	12	42	6	32	9	13	22	17	10	7	5	11	16	38	18	21	2	49	37	22	14	10	52	30	11	26	16	22	16	3	32	12	0	34	23	11
ENSMUSG00000004344	0	0	0	0	0	0	0	13	0	0	0	15	0	0	0	0	0	0	0	0	0	0	0	0	0	0	0	0	0	0	0	0	0	0	0	0	0	0	0	0	0	0	0	0	0	0	0	0	0
ENSMUSG00000004347	25	36	52	50	50	32	42	36	42	39	52	38	26	52	48	17	25	26	29	42	40	67	38	32	33	27	19	43	23	27	29	34	29	23	64	24	27	16	43	25	31	20	36	38	43	44	37	40	34
ENSMUSG00000004356	517	573	550	664	579	618	583	592	513	743	578	769	578	626	433	720	514	543	470	491	614	479	859	701	485	387	386	531	430	466	512	447	455	567	449	328	496	546	442	552	483	439	392	407	423	553	506	387	76
ENSMUSG00000004359	9	22	13	13	8	8	318	49	92	16	147	227	18	18	10	217	8	28	8	39	13	144	91	311	36	32	146	125	15	44	67	15	386	160	19	114	298	54	197	87	13	26	20	197	25	24	30	10	769
ENSMUSG00000004360	0	0	0	0	0	0	0	0	0	0	0	0	0	0	0	0	0	0	0	0	0	0	0	0	0	0	0	0	0	0	0	0	0	0	0	0	0	0	0	0	0	0	0	0	0	0	10	3	0
ENSMUSG00000004364	1807	2270	2782	2762	1487	1740	2015	2288	2032	2064	1798	1838	2777	2655	2104	2762	2720	2750	3610	2166	2080	2723	2637	2523	2112	1337	1652	1433	1748	2604	1357	1655	1534	1193	1416	1283	2281	1932	1626	1901	2014	2086	1266	1349	2059	1916	1891	2246	2319
ENSMUSG00000004371	18	36	0	18	6	5	20	1	6	10	3	8	0	0	0	0	2	8	3	3	0	1	1	6	4	44	3	21	11	32	2	16	22	3	9	5	0	10	2	25	10	2	18	0	1	7	1	1	0
ENSMUSG00000004383	156	113	27	230	39	89	129	73	102	55	78	95	46	57	88	20	66	119	134	43	110	131	136	164	132	135	135	120	192	74	183	153	108	130	41	73	98	101	79	5	78	61	102	41	94	49	66	65	8
ENSMUSG00000004393	48	163	9	197	140	74	69	20	259	114	9	151	148	34	61	229	393	32	317	38	73	11	236	38	223	131	138	6	300	184	553	71	138	300	163	69	129	95	7	366	147	145	141	88	172	90	43	324	88
ENSMUSG00000004394	3	88	10	3	2	73	13	62	4	3	2	5	4	3	16	1	1	3	1	2	2	1	1	2	4	5	12	11	4	6	99	28	20	58	2	3	2	1	58	3	3	4	3	3	13	4	4	4	12
ENSMUSG00000004415	1	1	1	1	1	4	1	1	1	1	1	1	1	1	1	1	1	1	1	1	1	1	1	1	1	1	1	1	1	1	1	1	1	1	1	1	1	1	1	1	1	1	1	1	5	1	3	3	0
ENSMUSG00000004446	26	4	55	30	100	37	3	74	55	47	3	39	53	127	33	85	8	95	70	75	8	4	321	80	3	31	21	9	2	63	5	38	150	4	5	4	3	54	138	209	92	22	646	31	78	63	125	32	195
ENSMUSG00000004451	0	0	0	0	0	0	0	0	0	0	0	0	0	0	0	0	0	0	0	2	0	0	0	0	0	0	0	0	0	0	0	0	0	0	0	0	0	0	0	0	0	0	0	0	0	0	0	0	0
ENSMUSG00000004455	80	60	76	108	84	64	113	68	116	104	89	88	78	67	70	50	130	76	105	101	45	57	53	82	115	106	99	144	139	108	64	66	135	81	90	49	56	72	38	56	87	65	75	67	49	65	58	66	82
ENSMUSG00000004460	787	909	796	1020	738	881	756	1026	968	1010	1060	1096	949	849	673	857	705	893	796	1030	1078	1058	944	995	563	571	491	1127	692	824	1079	798	1273	1054	922	1401	609	764	961	962	624	640	944	1045	467	829	806	403	306
ENSMUSG00000004462	400	500	471	622	514	434	458	458	553	478	513	671	382	460	484	381	433	524	347	436	320	278	282	387	360	290	226	401	327	336	344	413	425	426	381	465	290	306	302	382	259	212	294	317	369	339	388	274	39
ENSMUSG00000004473	0	0	0	0	0	0	0	0	4	0	0	0	0	0	0	0	1	0	0	0	0	0	0	0	0	0	0	0	0	0	0	0	12	0	0	0	0	7	0	0	0	2	0	0	3	0	0	0	0
ENSMUSG00000004500	0	0	0	0	0	0	0	0	0	0	0	0	0	0	0	0	0	3	0	0	0	0	0	0	0	0	0	0	0	0	0	0	0	0	0	0	0	0	0	0	1	0	0	0	0	0	0	4	20
ENSMUSG00000004508	92	68	28	13	101	43	61	50	32	52	73	120	100	57	47	68	44	37	37	36	59	32	12	50	106	52	42	92	85	63	65	64	47	42	45	50	35	63	38	27	56	48	49	32	55	24	21	45	212
ENSMUSG00000004530	16	24	5	3	5	10	7	1	33	15	16	1	4	35	4	15	32	29	27	5	12	17	4	5	5	4	2	8	0	1	10	8	3	0	4	4	0	3	4	9	2	0	8	9	7	6	2	6	73
ENSMUSG00000004535	2368	2444	2086	2801	2648	2371	2453	2688	2588	2427	2324	2543	1869	2270	2412	2394	2427	2307	2439	2290	2405	2640	2322	2642	2312	2167	2245	2373	2134	2606	2347	2185	1949	2282	1784	1966	2262	1828	1994	2195	1590	1913	2020	1974	1708	2360	1894	1899	579
ENSMUSG00000004540	0	0	0	7	1	0	0	0	0	0	0	0	0	9	1	0	2	0	1	0	2	0	0	2	2	0	0	3	0	0	3	0	0	5	0	0	0	0	0	0	0	0	3	0	8	0	1	1	0
ENSMUSG00000004542	0	0	0	0	0	0	2	0	0	0	0	0	0	0	0	0	0	0	0	0	0	0	0	0	0	0	0	0	0	0	0	0	0	0	0	0	0	0	0	0	0	0	0	0	0	0	1	0	0
ENSMUSG00000004552	0	0	0	0	0	0	0	0	0	0	0	0	0	0	0	0	0	0	0	0	0	0	0	0	0	0	0	0	0	0	0	0	0	0	0	0	0	12	0	0	0	0	0	0	0	0	0	0	0
ENSMUSG00000004558	1	0	0	1	1	0	1	0	1	0	0	0	0	0	0	0	0	0	0	0	0	1	1	1	1	1	1	1	1	0	1	0	0	0	0	0	1	1	0	0	1	1	1	1	1	0	0	2	0
ENSMUSG00000004561	98	109	43	92	105	89	122	122	103	90	129	115	124	34	134	78	119	53	75	112	60	39	105	88	78	98	60	66	94	55	72	63	80	53	61	49	93	118	71	51	44	78	80	81	113	63	53	84	67
ENSMUSG00000004562	0	1	0	0	0	0	1	0	0	0	0	0	9	0	0	0	1	1	0	5	0	0	0	0	0	0	0	0	0	0	2	0	0	0	0	4	0	0	8	0	0	0	0	0	8	0	0	1	0
ENSMUSG00000004565	124	111	101	217	131	129	121	139	140	90	44	83	106	138	105	113	130	184	107	128	136	126	199	161	154	162	131	219	270	79	191	103	237	108	117	111	191	488	135	131	212	219	235	251	175	212	130	197	20
ENSMUSG00000004567	11	20	7	11	7	7	15	10	8	7	12	6	15	0	10	9	0	7	5	9	10	20	10	12	22	15	25	31	21	24	15	10	9	33	12	24	19	42	10	8	11	5	12	16	13	11	13	12	2
ENSMUSG00000004568	150	78	102	94	26	25	56	52	44	19	35	63	33	54	70	44	64	102	63	42	44	68	37	22	3	19	41	27	2	48	13	8	63	41	26	18	49	5	54	35	137	78	85	39	39	34	22	49	228
ENSMUSG00000004591	598	619	940	536	374	409	525	453	525	494	531	545	811	623	863	876	989	1099	894	541	566	578	462	545	385	653	429	352	365	449	405	608	388	526	729	455	321	372	302	471	444	485	488	328	438	324	729	478	1259
ENSMUSG00000004610	65	16	3	5	4	27	12	17	4	2	22	5	35	5	14	55	65	4	5	12	29	5	5	35	7	2	4	89	1	4	4	14	2	32	5	2	24	7	2	44	11	10	21	37	25	20	1	55	6
ENSMUSG00000004626	8	1	3	7	0	0	1	1	2	3	1	1	3	10	7	5	4	2	5	4	7	5	16	4	3	7	0	7	5	0	6	4	0	6	1	6	7	16	4	2	12	6	7	7	8	4	9	1	18
ENSMUSG00000004630	0	0	0	0	0	0	0	0	0	0	0	0	0	0	0	0	0	0	0	0	0	0	0	0	0	0	0	0	0	0	0	0	0	0	0	0	0	1	0	0	0	0	0	0	0	0	0	0	0
ENSMUSG00000004631	0	0	0	10	0	1	0	0	0	0	0	0	0	0	0	0	3	0	0	0	8	0	0	0	0	2	0	0	0	0	0	0	3	0	0	0	0	0	0	0	0	0	0	1	0	0	0	3	4
ENSMUSG00000004633	182	241	337	192	289	314	218	283	296	244	263	255	247	276	249	163	190	303	230	256	309	192	138	283	168	195	180	209	182	197	195	248	234	326	296	250	203	201	202	280	120	225	226	213	193	294	331	303	130
ENSMUSG00000004637	30	81	57	95	49	73	47	52	38	70	72	61	71	63	48	42	74	60	35	55	71	68	38	52	53	53	71	62	36	42	58	44	56	69	92	82	39	73	42	49	80	43	61	29	24	79	56	53	172
ENSMUSG00000004642	8160	8972	5135	10176	10381	7520	8327	8624	8076	7263	10598	10399	6204	4873	5377	6492	5345	5594	4756	6979	5657	6499	6199	5712	10731	8040	7972	14427	14565	8136	11103	7022	8067	8826	5530	6824	6290	7377	6198	5780	9203	5791	6187	9464	7389	6181	4077	4390	1479
ENSMUSG00000004651	0	0	0	0	0	0	0	0	0	0	0	0	0	0	2	0	0	0	2	0	0	3	0	0	0	0	0	0	0	0	0	0	0	2	0	0	0	0	0	0	0	0	0	0	0	0	0	0	0
ENSMUSG00000004655	10	6	1	7	0	1	2	0	0	4	2	1	1	3	6	7	2	10	4	7	6	1	8	6	3	2	17	1	2	10	10	2	1	12	3	4	14	7	5	12	9	32	6	13	15	11	16	10	4
ENSMUSG00000004661	84	113	213	186	153	284	187	107	198	88	169	193	195	73	167	166	136	236	103	245	137	194	166	237	126	97	158	192	179	72	328	137	104	64	123	83	104	155	195	101	172	78	123	226	168	292	183	143	10
ENSMUSG00000004665	6	8	9	8	6	16	6	7	7	7	7	7	9	11	9	7	7	23	7	6	6	6	5	6	4	5	5	5	4	7	11	7	6	7	7	7	6	4	6	7	4	4	5	5	5	7	8	7	62
ENSMUSG00000004667	1572	1168	637	915	1484	1195	1516	1346	1302	1270	1036	2192	1838	1134	1098	994	693	1525	1162	1152	1073	1103	1947	1147	1793	1137	1660	1745	1753	1825	1207	1105	1165	1890	927	1327	1482	2360	1267	1214	1551	1952	932	1372	1577	1108	1145	1680	708
ENSMUSG00000004668	104	69	95	83	67	47	42	78	62	56	73	87	94	91	95	71	98	123	123	93	83	173	119	82	46	56	39	37	44	47	37	34	48	54	57	55	62	74	81	95	81	74	76	58	105	97	70	71	68
ENSMUSG00000004677	701	825	661	930	1048	970	929	785	940	939	956	1220	494	635	354	418	522	705	367	581	461	710	510	676	947	1044	995	1246	1491	1171	1032	787	1068	761	453	650	640	778	1110	534	998	467	561	738	578	499	601	496	522
ENSMUSG00000004698	28	43	37	30	21	32	41	42	54	31	32	36	36	62	80	34	78	56	81	59	46	56	53	50	16	23	26	16	18	35	12	35	24	33	17	23	24	23	21	19	28	19	44	12	28	58	48	52	79
ENSMUSG00000004707	0	0	0	0	0	0	0	0	0	0	0	0	0	0	0	0	1	0	0	0	0	1	0	0	0	0	0	0	0	0	0	0	0	0	0	0	0	0	0	0	0	0	0	0	0	0	0	0	0
ENSMUSG00000004709	0	0	0	2	0	1	2	0	2	0	1	1	0	0	0	0	0	0	1	5	0	0	1	3	0	1	0	0	1	1	0	0	0	0	0	0	1	0	0	0	2	0	1	0	1	0	0	3	0
ENSMUSG00000004730	0	0	0	0	0	0	0	0	0	0	0	0	3	0	0	0	0	0	3	1	0	0	0	0	0	0	0	0	0	0	0	0	0	0	0	0	0	2	0	0	0	0	0	0	0	0	0	6	0
ENSMUSG00000004748	0	0	0	0	0	0	0	0	0	0	0	0	0	0	0	0	4	0	0	0	0	0	0	0	0	0	0	0	0	0	0	0	0	0	0	0	0	0	0	0	0	0	0	0	0	0	0	0	0
ENSMUSG00000004768	481	358	489	463	504	467	406	497	463	351	562	449	356	517	351	365	426	448	404	436	361	318	343	529	425	352	381	422	507	390	316	334	378	356	360	370	309	385	288	308	397	471	270	328	343	337	270	245	101
ENSMUSG00000004771	1447	1305	1549	1630	1489	1324	1387	1485	1652	1217	1626	1700	1437	1199	1239	1180	1476	1462	1522	1474	1304	1298	1206	1405	1102	1421	1230	1448	1413	1420	1183	1646	1689	1780	1424	1600	980	855	978	1047	963	849	1083	1179	1198	1173	1221	1103	1090
ENSMUSG00000004788	298	102	89	156	109	131	95	125	146	117	125	133	105	84	64	85	117	40	48	85	55	58	86	169	259	170	244	144	325	92	239	126	104	231	276	149	180	281	190	79	223	238	158	223	116	30	42	233	58
ENSMUSG00000004789	308	263	184	416	58	177	98	177	118	128	132	106	91	210	116	33	105	350	134	198	229	62	223	199	372	225	247	167	236	227	309	212	172	136	191	235	193	427	99	189	215	266	134	185	165	204	144	287	477
ENSMUSG00000004791	0	0	1	0	0	1	0	0	0	1	0	0	0	1	2	1	2	1	1	0	1	0	1	0	0	0	0	0	1	0	0	1	0	1	1	1	0	0	0	1	0	2	0	0	0	0	1	1	0
ENSMUSG00000004798	152	167	180	276	182	195	228	191	198	170	260	263	209	190	148	165	200	194	174	168	195	260	167	127	228	137	196	176	154	149	63	188	211	131	182	129	141	149	250	195	172	176	111	162	185	122	164	190	232
ENSMUSG00000004814	0	0	0	0	0	0	0	0	0	0	0	0	0	0	0	0	0	0	0	0	0	0	0	0	0	0	0	0	0	0	0	0	0	0	0	0	0	0	0	0	0	0	0	0	0	0	0	0	0
ENSMUSG00000004815	0	0	0	0	0	0	0	0	0	0	0	0	0	0	0	0	2	1	0	0	0	0	0	9	0	0	0	0	0	0	0	0	0	0	0	0	0	0	0	0	0	2	0	0	0	0	0	3	0
ENSMUSG00000004837	1	1	2	1	1	1	1	1	1	1	1	1	1	1	2	2	2	2	2	1	2	1	1	1	1	1	1	1	1	1	1	1	1	1	1	1	1	1	1	1	1	1	1	1	1	1	1	2	3
ENSMUSG00000004842	0	0	0	0	0	0	0	0	0	0	0	0	0	0	0	0	1	0	0	0	0	0	0	0	0	0	0	0	0	0	0	0	0	0	0	0	0	0	0	0	0	0	0	0	0	0	0	0	0
ENSMUSG00000004843	207	208	98	154	130	189	87	150	175	99	166	144	128	144	71	137	109	145	206	96	94	81	152	126	124	133	114	128	95	171	107	107	148	141	150	168	60	77	77	91	77	46	83	63	42	86	89	83	143
ENSMUSG00000004846	15	9	0	2	14	16	29	22	13	22	12	12	2	1	0	0	1	10	0	29	16	0	33	4	38	2	32	19	1	6	12	6	24	41	6	0	6	37	28	0	13	0	6	16	7	41	5	9	0
ENSMUSG00000004849	139	136	121	346	162	81	162	146	135	178	109	43	2	174	57	61	20	52	25	32	69	119	159	124	160	133	150	119	214	85	183	185	45	110	111	192	218	129	160	187	84	115	35	147	133	87	86	111	42
ENSMUSG00000004864	0	1	7	0	0	0	4	1	1	1	1	0	5	1	14	8	21	0	5	0	1	0	22	18	11	1	16	0	1	0	0	1	1	1	1	1	0	28	1	1	1	1	1	12	1	2	1	0	8
ENSMUSG00000004865	3137	3022	3543	4379	4438	3365	3878	4191	4372	4885	4472	2892	3456	3839	3160	2945	3975	3076	3936	4265	4420	3044	3699	4528	4083	4989	4437	4003	4343	5165	3902	5548	5865	4557	6587	5613	5005	4865	3880	4869	3522	3426	5018	5151	3325	5829	5720	4610	1876
ENSMUSG00000004872	52	64	12	58	1	143	95	158	136	63	45	24	41	10	13	6	57	165	88	132	44	10	154	44	79	16	69	79	41	52	14	39	32	59	23	93	164	97	79	120	51	63	46	72	14	28	145	41	0
ENSMUSG00000004880	483	486	306	359	448	327	341	408	271	460	385	832	308	244	195	363	344	251	325	572	403	415	453	393	129	170	131	222	172	447	253	433	346	284	306	301	111	125	165	206	122	211	192	182	116	173	329	99	146
ENSMUSG00000004885	141	55	64	74	133	242	119	141	278	166	120	93	171	42	98	69	219	78	63	95	85	97	83	136	110	121	155	141	170	87	125	131	71	110	137	133	134	204	159	89	97	173	84	105	95	76	123	124	15
ENSMUSG00000004891	6	3	2	6	37	19	17	2	38	20	3	3	6	7	3	76	6	2	8	4	10	5	2	2	1	1	30	9	2	4	3	9	2	2	15	2	12	3	2	1	0	1	15	24	2	2	50	2	6
ENSMUSG00000004892	1	1	0	1	0	5	1	1	1	1	7	1	1	1	0	0	2	2	0	0	0	0	0	0	1	1	13	1	1	1	1	0	0	1	0	1	1	0	1	0	2	0	0	9	0	1	1	11	0
ENSMUSG00000004894	0	0	0	0	0	0	0	0	0	0	0	0	0	0	0	0	0	1	0	0	0	0	0	0	0	0	0	0	0	0	0	0	0	0	0	0	0	0	0	0	0	0	0	0	0	0	0	0	0
ENSMUSG00000004895	29	20	16	7	4	27	24	29	32	25	40	25	19	30	26	29	29	16	44	22	13	57	13	17	23	8	28	20	1	19	14	34	36	28	21	33	56	19	59	50	43	34	35	28	51	17	21	22	179
ENSMUSG00000004896	92	37	78	91	139	35	72	56	60	134	63	62	111	21	37	55	38	29	42	82	52	56	34	79	20	82	6	76	72	45	153	66	45	47	46	27	77	28	36	38	48	38	27	89	39	40	34	35	49
ENSMUSG00000004897	2166	1998	2370	2381	2005	1804	1712	2081	1844	1660	1910	1536	2030	2049	1912	1947	2027	2515	2684	2036	2099	2235	1642	2006	2047	2755	2224	2415	2668	2272	1961	2944	2608	2444	2795	2653	2329	2136	1924	2479	1915	2040	2575	2402	1536	2340	2646	2616	1129
ENSMUSG00000004902	1	1	0	7	1	1	1	1	1	1	3	5	1	1	1	1	2	0	1	1	1	1	2	1	2	1	1	2	2	1	1	1	7	1	8	1	1	2	1	1	2	1	1	1	1	1	1	1	1
ENSMUSG00000004929	33	2	26	14	21	27	24	2	24	19	8	12	16	28	30	7	13	70	15	57	4	3	2	48	6	18	6	18	12	8	3	0	53	74	5	21	80	38	14	43	6	17	105	65	59	16	21	21	171
ENSMUSG00000004931	8	8	114	9	17	2	25	6	7	11	4	4	10	11	59	3	14	5	53	28	8	21	2	4	5	6	7	16	6	5	4	4	13	102	4	5	4	2	4	4	6	11	3	8	5	6	6	3	27
ENSMUSG00000004933	1	0	1	1	1	0	0	0	0	0	1	1	1	1	1	1	1	1	1	1	0	1	1	0	0	11	0	0	0	1	1	0	0	0	0	0	1	1	0	0	0	0	1	0	0	0	0	1	0
ENSMUSG00000004934	756	1011	1080	661	619	767	366	449	580	182	245	221	618	929	607	802	614	997	385	1068	1300	266	1067	693	317	922	884	571	179	445	492	793	1581	1660	646	2613	131	182	785	333	113	96	738	362	160	88	750	410	163
ENSMUSG00000004936	2986	3877	3504	3541	2968	2809	3517	2966	2921	3105	3355	3455	3150	2963	3457	3448	3336	3640	3488	3421	2845	2881	2891	3119	2642	2573	2414	2669	2834	2551	2502	2541	2437	2920	2317	2524	2221	2596	2310	2168	2612	2442	2559	2256	2519	2859	2200	2613	1314
ENSMUSG00000004937	105	155	97	63	141	107	120	216	158	112	68	72	169	212	108	159	86	66	85	219	106	129	193	111	257	99	85	195	202	266	175	124	124	54	168	152	201	256	167	240	222	168	216	153	145	95	78	224	464
ENSMUSG00000004939	2	2	2	2	2	2	2	2	2	2	2	2	2	2	2	2	2	5	2	15	2	2	2	2	2	2	3	2	2	2	2	2	2	2	2	2	2	2	2	2	2	3	2	2	2	2	2	2	0
ENSMUSG00000004945	37	22	12	30	16	26	18	16	28	34	34	14	27	44	22	42	14	40	80	38	28	25	50	34	32	41	20	40	22	24	9	34	20	29	21	25	24	34	16	50	20	28	36	30	13	71	34	74	68
ENSMUSG00000004947	11142	17385	16753	14794	20174	16228	17224	16595	17023	14940	13580	13018	11075	11568	12390	13320	11159	14681	6229	15463	13605	12020	12279	14831	17296	15758	17851	21064	20873	13165	21190	15047	21571	17884	11779	15596	14571	16666	15324	19023	15393	11097	15722	21128	11549	16112	12779	11011	2834
ENSMUSG00000004948	1604	2074	2984	1340	2334	2587	2182	1888	1573	1418	2022	1657	2992	2908	2584	3615	2452	2936	2337	2843	3079	2729	2352	3768	2174	2178	1973	2518	2720	1726	3153	2891	3062	2931	3443	2109	2968	3322	3013	3147	3469	2630	3532	4985	3109	2678	4472	2875	193
ENSMUSG00000004951	6	8	10	8	4	4	4	4	4	2	3	3	12	6	21	5	7	11	4	4	13	3	9	5	4	13	18	5	3	3	6	5	6	5	19	2	9	35	11	4	6	4	11	37	9	2	9	26	12
ENSMUSG00000004952	1233	1251	1153	908	1459	1428	1298	1564	1656	1609	1621	1338	1706	1441	1465	1272	1650	1677	1905	1659	1398	1258	1185	1642	2265	1743	2486	1846	2398	1426	1659	1684	1461	1657	1546	1613	1811	1898	1953	1562	1554	1121	1229	1857	1368	1460	1178	1786	583
ENSMUSG00000004961	84	26	27	2	53	36	18	5	52	10	22	65	60	158	3	207	10	9	41	24	31	7	96	19	52	20	26	20	9	2	149	10	14	49	26	15	108	122	116	20	115	67	96	61	95	63	36	66	135
ENSMUSG00000004980	577	593	326	485	650	520	805	533	588	688	804	825	550	436	514	488	395	357	469	643	423	599	807	506	730	589	527	887	697	665	602	501	571	482	409	540	688	790	369	502	466	443	516	665	432	598	433	556	334
ENSMUSG00000004988	0	1	1	4	0	3	0	2	1	1	0	0	1	1	4	0	0	0	0	13	0	0	0	0	2	3	6	24	0	1	0	0	0	1	13	1	2	5	0	5	0	0	0	0	0	1	4	2	0
ENSMUSG00000004994	89	51	24	150	147	247	135	61	78	83	118	18	58	49	342	141	162	15	11	18	61	112	253	25	79	50	43	154	26	4	4	2	23	130	48	94	269	83	118	132	72	89	150	90	12	60	92	31	16
ENSMUSG00000004996	3	49	35	17	14	9	5	15	26	11	19	22	30	1	18	8	10	4	15	4	6	16	0	12	42	20	33	71	19	29	99	27	22	11	44	49	8	47	1	28	42	11	0	0	12	1	20	3	26
ENSMUSG00000005034	256	127	307	138	152	120	123	120	159	109	148	116	182	241	122	180	203	176	235	193	95	152	124	151	145	174	126	164	161	141	152	103	153	109	84	87	123	103	63	79	112	103	104	128	105	136	133	122	58
ENSMUSG00000005043	7	5	3	6	5	3	5	4	4	5	5	6	6	6	5	5	4	4	55	5	4	6	6	5	5	4	4	6	6	5	6	4	4	4	3	4	6	7	5	4	5	53	4	5	4	5	4	4	2
ENSMUSG00000005045	0	0	0	0	2	0	0	0	0	1	0	0	1	0	0	0	1	1	0	0	1	0	0	0	0	1	0	2	1	0	0	3	0	1	0	0	4	0	5	1	0	0	0	2	0	2	0	0	0
ENSMUSG00000005054	4	4	9	5	6	7	4	5	4	6	7	7	5	55	10	9	19	19	11	8	26	55	7	35	3	30	3	4	3	6	5	6	6	19	19	6	6	6	6	6	52	5	6	5	5	30	6	17	82
ENSMUSG00000005057	8	29	48	10	26	4	43	7	50	15	15	149	11	13	8	7	7	13	5	5	5	6	28	6	5	122	13	161	12	7	6	7	238	103	43	7	6	4	6	6	56	4	5	5	6	8	8	6	0
ENSMUSG00000005069	137	91	145	95	122	89	109	113	158	153	142	98	100	135	110	82	88	129	87	77	69	81	102	95	104	114	106	119	124	67	117	57	103	113	95	99	88	103	29	97	106	64	72	104	128	84	54	41	37
ENSMUSG00000005078	1145	1116	828	1314	871	910	750	962	1106	988	890	713	902	950	766	1170	765	807	832	1152	1150	802	910	1010	725	977	909	1615	796	1045	818	1395	1628	1606	1426	1552	934	613	1077	1417	639	1079	1562	1302	826	1344	1141	848	17
ENSMUSG00000005087	0	0	0	0	0	0	0	0	0	0	0	0	0	0	0	0	0	1	0	0	0	0	0	0	0	0	0	0	0	0	0	0	0	0	0	0	0	0	0	0	0	0	0	0	0	0	0	0	0
ENSMUSG00000005089	0	0	0	0	0	0	0	0	0	0	0	0	0	0	0	1	0	0	0	0	0	0	0	0	0	0	0	0	0	0	0	0	0	0	0	0	0	0	2	0	0	0	0	0	0	0	0	0	0
ENSMUSG00000005102	742	894	928	1183	976	756	1042	719	810	813	943	913	780	798	976	886	1173	1071	845	1057	798	895	792	1029	859	694	665	908	877	703	748	636	660	639	579	614	677	687	685	682	959	652	744	769	793	729	540	603	341
ENSMUSG00000005103	515	576	463	739	493	345	504	445	551	537	644	639	534	793	656	689	798	788	911	532	514	621	620	585	471	373	333	397	513	455	383	442	422	424	411	466	412	365	422	409	584	486	457	402	568	507	378	463	752
ENSMUSG00000005107	77	2	40	23	7	7	23	15	42	32	12	13	1	1	0	13	2	17	9	7	3	27	1	16	9	36	23	8	26	7	15	11	17	34	15	15	51	1	27	11	10	1	2	29	27	36	32	12	0
ENSMUSG00000005124	0	0	6	4	0	0	7	2	2	17	18	11	22	0	5	10	6	0	0	13	5	9	0	1	0	0	3	0	3	0	10	9	0	1	5	5	4	26	4	11	11	2	9	7	5	0	5	7	0
ENSMUSG00000005125	0	0	5	0	3	0	6	0	5	17	0	0	2	0	8	0	0	1	0	3	4	8	4	5	5	1	0	0	0	2	0	10	5	0	0	0	0	0	0	0	0	0	0	11	0	0	1	6	0
ENSMUSG00000005131	49	36	38	44	41	61	43	61	48	46	67	68	39	50	37	39	51	31	46	51	39	35	57	46	63	53	66	63	53	62	53	58	40	29	84	46	69	44	52	53	47	54	45	51	55	44	51	55	95
ENSMUSG00000005142	8	4	22	7	3	5	3	2	2	3	12	4	7	7	3	3	3	48	23	40	1	68	3	2	16	6	7	13	34	4	4	36	2	2	1	2	3	5	3	17	62	1	3	5	21	3	19	2	37
ENSMUSG00000005148	6	16	13	159	10	36	36	35	8	10	227	11	138	8	15	216	52	81	17	133	116	13	12	269	94	7	8	8	7	19	8	10	156	10	82	32	104	123	10	80	10	61	24	9	10	9	157	26	432
ENSMUSG00000005150	26	24	25	34	16	38	17	30	27	13	34	20	9	9	11	13	23	0	13	12	14	11	28	24	32	20	33	25	46	29	9	29	12	29	11	10	54	60	34	24	28	37	11	33	30	36	13	25	18
ENSMUSG00000005161	3676	1904	1846	2913	3494	3268	3790	3658	3851	2883	4122	4183	2941	1881	2302	2128	2726	2139	2621	2842	2437	2535	3194	3006	5654	4918	5272	5227	6858	4335	3512	3541	3383	3768	2957	3387	5481	5016	4370	3098	3800	2918	2730	4436	3834	3950	2972	4888	2138
ENSMUSG00000005198	821	349	372	717	618	453	827	459	554	555	738	572	498	508	475	588	710	609	366	730	776	796	1181	730	741	388	417	847	930	766	558	412	493	488	370	304	797	655	577	682	1198	564	605	675	632	520	480	555	128
ENSMUSG00000005202	7	6	3	6	5	3	6	5	5	5	5	5	6	6	5	4	4	3	4	5	4	5	6	5	6	5	6	6	7	5	6	4	4	5	4	5	6	6	5	5	5	5	4	5	5	5	5	4	9
ENSMUSG00000005204	79	34	53	19	49	36	27	30	29	31	45	46	194	131	229	164	130	189	126	90	57	63	86	124	44	31	26	36	17	28	25	24	32	35	20	29	66	54	26	36	39	80	74	34	84	40	43	38	330
ENSMUSG00000005220	0	0	0	0	3	1	0	0	0	0	2	7	0	0	0	0	0	0	0	0	1	0	0	0	0	5	0	1	0	2	0	0	0	0	1	0	3	0	1	0	0	0	0	1	4	0	0	2	0
ENSMUSG00000005225	2321	2174	2356	2775	2373	2152	2660	2116	1742	2096	2755	3157	2425	1869	2200	2303	2173	2460	2094	2390	2046	2217	1894	1945	1915	2121	1560	2011	2011	1398	1978	1655	1956	1953	1783	1397	1314	1703	1312	1872	2001	1678	1886	1710	1911	2028	1814	1652	1122
ENSMUSG00000005232	0	0	0	0	0	0	0	0	0	0	0	0	0	0	0	0	0	0	1	0	0	0	0	0	0	0	0	0	1	0	0	0	0	0	0	0	0	0	0	0	0	2	0	0	0	0	0	0	0
ENSMUSG00000005233	271	131	113	237	281	231	237	276	200	234	246	297	220	96	113	154	265	110	170	167	130	196	168	261	392	338	325	388	229	402	214	222	220	294	275	168	344	386	224	315	242	281	267	311	248	398	181	327	786
ENSMUSG00000005237	37	2	19	2	19	21	7	39	41	31	19	55	13	2	1	116	30	18	36	30	1	45	1	2	2	32	129	48	13	20	75	2	36	2	14	57	9	1	87	28	23	5	26	26	77	22	5	4	0
ENSMUSG00000005251	103	5	30	4	2	23	5	5	124	12	31	2	11	15	2	21	13	84	5	7	32	115	62	26	42	7	241	3	5	14	29	31	41	107	25	4	23	48	427	120	224	33	31	191	5	58	188	115	10
ENSMUSG00000005262	16	15	24	21	7	24	25	18	12	11	19	21	32	41	53	32	29	66	87	42	31	44	60	62	43	11	6	13	3	23	11	9	13	14	2	4	23	37	31	26	24	22	16	14	33	29	26	19	19
ENSMUSG00000005267	0	0	0	0	0	0	0	0	0	0	0	0	0	0	0	0	1	0	0	0	0	0	0	0	0	0	0	0	0	0	0	1	0	0	0	0	0	0	0	0	0	0	0	0	0	2	0	0	1
ENSMUSG00000005268	239	1376	1001	903	1061	778	1219	1297	929	1116	863	1052	895	1320	1258	1225	1203	1152	958	1026	953	1275	1381	1226	686	889	751	1098	872	1745	504	1092	813	795	1134	1123	1429	982	1084	1218	889	991	1351	694	926	1475	1525	1023	500
ENSMUSG00000005299	226	381	492	295	236	345	388	309	439	410	423	310	274	296	291	289	311	313	356	257	302	349	333	329	409	405	393	441	325	268	441	482	567	482	492	385	242	282	440	415	180	281	289	318	192	425	410	304	152
ENSMUSG00000005312	3888	4328	3039	4957	6331	4051	5724	4762	4394	4955	4902	4177	3119	3156	3355	3381	3624	3920	2574	4690	3237	3587	4003	4852	5970	5101	5497	6721	7663	4801	5452	4563	5645	4828	4452	4729	4091	4475	3579	4135	4808	3828	4608	5973	4805	4651	3541	3470	1097
ENSMUSG00000005320	128	6	7	6	6	6	7	7	7	7	6	7	6	6	7	6	6	14	8	7	8	7	6	7	6	7	8	6	6	6	5	7	6	7	7	7	7	5	6	8	7	9	8	7	8	7	8	7	0
ENSMUSG00000005338	0	0	0	0	0	0	0	0	0	0	0	0	0	0	0	0	0	3	0	0	0	0	0	0	0	0	0	0	0	0	0	0	0	0	0	0	0	0	0	0	0	0	0	0	0	0	0	1	1
ENSMUSG00000005339	0	0	0	0	0	0	0	0	0	0	0	0	0	0	0	0	0	0	0	0	0	0	0	0	0	0	0	0	0	0	0	0	0	0	0	0	2	0	1	0	0	0	0	0	0	0	0	0	0
ENSMUSG00000005354	1446	1375	1096	1228	1614	1140	1753	1613	1578	1488	1638	1216	1417	1716	1582	1069	1662	1330	1602	1638	1427	1409	1429	1591	1950	1991	1862	2113	2324	1851	1692	1549	1503	1441	1488	1481	2627	2359	1947	2008	2406	1805	1500	2060	2167	1749	1514	2441	1580
ENSMUSG00000005360	1	0	0	1	0	0	0	0	0	0	0	0	1	1	0	2	3	4	0	0	0	0	0	0	0	0	0	0	0	0	0	2	0	0	0	0	0	1	0	0	0	0	10	0	13	0	0	0	0
ENSMUSG00000005362	186	131	201	198	153	209	145	155	151	128	148	167	96	187	176	128	207	198	152	113	112	152	99	176	126	107	129	78	146	164	113	90	91	113	133	120	66	97	102	99	87	77	85	54	112	124	112	106	231
ENSMUSG00000005364	0	0	0	0	0	0	0	0	0	0	0	0	0	0	0	0	0	1	0	0	0	0	0	0	0	0	1	2	1	0	0	3	2	0	0	0	0	0	0	0	0	0	1	0	0	0	0	0	0
ENSMUSG00000005370	1959	2204	1653	2406	1671	1785	1776	2067	1957	1786	1897	2352	1654	1231	1229	1569	1574	1167	1163	1475	1154	1933	1696	1482	2142	1647	1790	1924	2171	1581	1827	1288	1380	1316	1325	1150	1470	1505	1253	1223	2137	1177	1246	1373	1656	1145	1292	1021	245
ENSMUSG00000005371	2277	2437	2831	2650	2182	2071	2492	2660	2079	2218	2742	2504	2849	2868	2821	3268	3318	3772	3952	2822	2091	2722	2142	2418	1955	2017	1608	1898	2062	2089	1799	1487	1670	1631	1528	1520	1481	1545	1580	1709	1904	1831	1922	1314	2508	1779	1835	1408	996
ENSMUSG00000005373	64	15	14	23	43	21	34	30	13	30	26	30	11	103	33	37	39	48	61	20	29	20	71	47	62	22	26	21	9	18	61	19	33	35	48	24	49	31	37	44	44	42	58	18	50	37	41	30	121
ENSMUSG00000005374	2	5	2	98	35	11	14	5	28	3	44	44	4	4	2	1	26	6	1	1	24	1	36	34	4	7	16	2	21	15	1	51	57	4	4	22	33	16	3	54	2	10	4	3	46	5	6	2	30
ENSMUSG00000005378	9	104	101	73	12	48	18	34	23	84	101	12	166	94	99	209	25	62	66	129	91	6	60	93	3	10	32	42	3	6	3	83	126	14	47	49	6	202	34	36	27	54	41	12	42	53	146	144	53
ENSMUSG00000005397	0	0	0	1	5	1	0	1	4	0	11	0	3	0	5	1	2	19	0	1	4	0	1	1	5	3	0	0	0	0	0	2	8	0	1	16	0	1	7	3	0	0	2	2	0	2	2	1	29
ENSMUSG00000005410	528	399	334	551	532	526	885	558	647	409	835	839	351	477	366	556	417	517	379	242	571	646	438	533	986	766	933	949	1094	607	1583	452	501	353	656	706	927	749	944	547	682	799	401	663	947	565	430	1057	231
ENSMUSG00000005413	0	0	0	0	0	0	0	0	0	0	0	0	0	0	0	0	0	0	0	0	0	0	0	0	0	0	0	0	0	0	0	0	0	0	0	0	0	0	0	0	0	0	0	0	0	0	0	9	0
ENSMUSG00000005417	2296	4101	3556	3367	2717	3321	2901	2928	3099	2311	2606	2351	1866	2963	1943	2335	2183	2521	1937	2155	2204	2908	2349	3103	3773	2945	3458	4766	4888	3938	4401	2679	3504	2887	3242	3207	2863	2757	2867	2870	3628	2992	2307	2515	3312	2536	2686	2331	1713
ENSMUSG00000005442	741	670	657	376	665	646	669	724	367	462	604	427	414	725	544	404	421	576	480	599	538	897	680	930	1150	794	927	892	1110	760	1338	957	706	916	680	762	862	869	647	796	1068	764	823	1221	885	487	807	713	201
ENSMUSG00000005447	1	3	2	1	8	5	5	11	39	7	22	6	21	1	3	19	7	0	2	3	8	1	15	6	16	1	1	34	35	21	1	27	15	26	8	22	1	12	10	3	18	2	23	16	15	20	13	3	3
ENSMUSG00000005465	0	0	0	0	0	0	6	0	0	0	0	0	0	3	10	0	2	7	0	0	3	2	0	2	3	2	2	0	0	0	0	4	3	0	0	0	0	3	0	0	4	0	1	0	0	5	0	3	0
ENSMUSG00000005469	677	626	557	587	639	581	741	732	511	604	800	920	545	333	570	726	609	575	342	486	347	695	326	617	778	435	480	713	787	493	725	418	476	395	422	516	363	520	476	459	803	539	446	512	459	458	313	283	163
ENSMUSG00000005470	1894	2384	2031	2440	2200	1909	2150	1918	1963	1887	2143	2107	1918	1852	2070	1937	2099	2248	1631	2134	1735	1772	1935	2237	2525	1815	1968	2704	2651	2145	2427	1962	2309	2136	1598	1915	2175	2375	1879	2051	2257	2101	2129	2903	2028	2175	1492	2122	692
ENSMUSG00000005481	3309	3421	1807	3272	2621	2656	3085	2706	3042	3009	3581	4231	2354	2410	2884	2820	2105	1942	2711	3199	3495	3434	4123	3738	3826	2684	2872	3354	3026	2936	3325	2724	2675	3155	2349	2738	4607	4327	3430	3282	3030	2932	3078	4118	2845	3321	1865	3140	2144
ENSMUSG00000005483	1502	1113	896	1182	1188	1236	1156	918	887	966	817	1315	696	821	413	710	843	638	353	734	643	835	618	674	940	1243	1117	1208	1226	1390	1136	1456	1465	1071	1206	1369	1001	1085	1169	977	1466	1195	1166	1236	1484	962	959	1227	1887
ENSMUSG00000005493	462	434	453	518	370	380	415	524	541	572	414	419	570	519	617	557	742	546	753	412	546	568	568	375	373	447	339	281	296	348	274	387	318	379	306	330	354	274	337	299	266	320	337	223	356	530	372	283	196
ENSMUSG00000005501	1	0	20	70	47	12	4	29	37	35	31	26	27	2	0	48	32	7	12	23	1	1	12	9	15	15	41	1	14	40	53	32	13	23	17	32	1	3	13	22	14	1	12	7	25	14	9	33	1
ENSMUSG00000005503	75	79	29	58	73	65	52	70	53	37	58	55	38	17	16	20	28	25	20	38	25	29	24	37	47	41	20	122	82	54	64	68	82	42	70	44	27	21	40	31	73	45	28	36	31	19	16	15	0
ENSMUSG00000005505	66	70	25	13	63	52	55	49	69	19	45	70	11	69	48	31	28	64	12	33	48	63	67	70	51	29	37	54	15	31	34	18	58	41	21	33	53	35	41	26	38	15	20	34	48	46	13	22	21
ENSMUSG00000005506	229	437	392	315	329	247	243	303	432	407	439	253	396	467	457	473	376	449	669	644	474	455	371	395	283	420	392	321	325	425	441	572	478	486	589	551	296	337	390	561	346	336	469	549	226	417	580	378	282
ENSMUSG00000005510	52	43	22	41	31	52	73	53	36	42	98	52	26	34	22	1	57	36	16	44	30	26	46	47	66	59	76	87	89	75	81	44	42	58	68	97	77	114	80	62	75	69	60	86	75	46	26	56	32
ENSMUSG00000005514	549	686	707	824	1085	944	944	943	1050	728	877	710	554	592	601	633	711	762	496	1253	703	572	697	994	914	520	551	1038	885	746	868	933	1358	745	603	1116	980	1305	767	927	755	554	936	1543	768	587	570	626	10
ENSMUSG00000005533	37	29	48	37	9	56	25	22	20	27	19	8	15	25	4	2	21	17	20	34	26	25	14	32	26	26	32	26	26	22	3	21	31	57	40	45	24	44	24	14	19	14	13	18	16	23	24	36	3
ENSMUSG00000005534	20	0	12	40	31	10	35	33	35	19	21	14	2	27	0	3	16	16	1	15	19	5	6	17	24	30	22	20	6	36	9	14	7	27	5	25	1	23	16	11	8	10	10	10	11	1	19	13	15
ENSMUSG00000005540	0	0	0	0	0	0	0	1	0	0	0	0	0	0	0	0	0	1	0	0	0	0	0	0	0	2	0	0	1	6	0	3	0	0	0	0	0	0	4	0	0	0	0	2	0	1	0	0	1
ENSMUSG00000005547	0	0	0	0	0	0	0	0	0	0	0	0	1	1	0	0	0	1	3	2	0	1	0	1	0	2	0	0	0	0	0	0	2	0	0	0	0	2	0	0	0	0	1	0	0	0	0	1	0
ENSMUSG00000005553	0	0	3	10	14	0	2	0	3	5	0	7	14	8	28	0	0	16	14	0	7	0	24	0	4	1	0	6	1	3	3	4	0	0	0	9	0	0	2	0	0	3	20	0	2	0	7	0	43
ENSMUSG00000005566	7527	10681	7466	9743	10884	8537	9469	8302	9295	9128	7213	7050	4850	6475	7189	6628	5059	6551	3398	8987	7982	6592	8534	8265	10295	7960	8846	13440	13042	7341	14927	10285	12855	10942	7690	9966	9296	12494	7950	9969	8328	8109	8789	13189	8231	9554	7153	6831	580
ENSMUSG00000005575	23	20	11	13	7	5	14	41	2	2	14	6	15	5	25	33	32	18	22	32	6	46	15	37	1	25	18	49	27	32	3	4	24	26	44	2	46	17	18	11	28	36	8	9	22	2	5	1	2
ENSMUSG00000005580	46	38	73	59	78	72	78	83	76	57	83	41	37	39	34	44	19	92	72	42	54	46	44	89	43	157	128	86	90	70	82	152	135	91	175	104	45	103	66	137	47	110	89	46	78	57	119	83	4
ENSMUSG00000005583	1	1	0	1	1	10	1	7	5	1	1	1	1	1	1	1	24	2	0	0	0	0	22	1	0	0	0	1	1	1	1	11	1	1	0	1	1	1	4	0	0	2	3	19	0	31	1	2	0
ENSMUSG00000005609	374	161	319	299	126	224	193	238	222	235	218	180	138	292	104	156	212	214	403	209	300	208	209	288	201	198	238	190	140	317	159	272	307	206	296	298	177	124	270	302	128	189	212	164	231	134	265	213	214
ENSMUSG00000005610	7224	6946	7588	9477	8719	6233	8840	6748	7673	6812	7806	7107	6832	7505	8697	8931	8933	11031	6629	8744	5310	8208	8030	9133	8105	7344	6038	7899	9002	6913	7093	5015	7164	4371	3811	4781	6467	5616	3913	4353	8140	5599	6815	6001	7884	6550	4730	5153	4783
ENSMUSG00000005611	93	216	65	220	27	14	64	113	143	38	85	51	6	7	63	94	7	174	53	13	21	54	15	36	97	84	29	105	22	52	41	36	30	163	64	2	2	46	73	35	74	34	32	45	26	54	50	72	71
ENSMUSG00000005615	378	368	360	414	355	353	446	288	387	495	441	392	278	567	324	381	343	339	456	299	325	189	433	407	281	505	428	297	321	379	297	652	373	504	638	659	223	413	411	440	456	466	425	358	166	327	740	478	766
ENSMUSG00000005621	537	526	783	682	519	579	471	476	385	618	413	375	713	770	1152	692	807	703	812	607	615	923	870	688	639	740	819	494	639	589	593	573	727	625	546	638	622	793	645	643	901	900	796	650	873	616	691	757	873
ENSMUSG00000005625	1934	1856	1399	1719	1528	1633	1865	1759	2019	1467	1590	2249	1120	1267	1238	1300	1409	980	1480	1416	1449	1270	1798	1755	2641	1852	2380	2890	2594	1690	1922	1632	1990	1563	1433	2368	2410	2914	1953	1934	1528	1673	1459	1822	1576	2014	1560	1945	1136
ENSMUSG00000005628	0	0	0	1	3	3	10	0	4	38	29	2	60	61	25	16	52	10	60	49	26	12	39	48	5	12	10	8	7	2	24	34	7	6	2	0	24	25	53	64	79	25	43	35	11	57	22	85	2
ENSMUSG00000005640	0	0	0	0	0	0	0	0	2	0	0	1	0	0	0	0	4	2	0	0	0	0	0	1	0	1	0	2	0	1	1	0	0	2	0	0	0	0	0	0	0	0	0	1	1	0	0	0	0
ENSMUSG00000005649	0	0	0	0	0	0	0	0	0	0	0	0	0	0	0	0	0	0	0	0	0	0	0	0	0	0	0	0	0	0	0	0	0	0	0	0	0	0	0	0	0	0	0	0	0	0	0	0	0
ENSMUSG00000005656	294	246	280	423	430	347	495	432	611	543	525	440	222	401	364	268	288	278	293	421	318	251	297	338	464	851	789	521	505	465	425	736	853	732	854	835	316	588	460	581	229	466	635	647	245	497	516	602	351
ENSMUSG00000005667	3937	5497	5599	4882	5194	4824	4598	5827	5215	4907	4867	6409	3706	4239	4782	4291	4360	5239	3368	4605	4496	4598	3865	4531	4556	4657	5265	5449	5410	4726	5272	5740	5537	6286	5287	5972	4606	4052	4675	5553	3561	3656	4373	5064	4482	6015	4669	4748	3309
ENSMUSG00000005672	1051	672	1123	690	680	989	883	746	765	1126	1025	990	1488	1326	1392	1509	1415	1418	1599	1208	1189	1592	1294	1182	628	536	674	598	446	703	456	604	485	818	732	557	744	818	838	970	1229	931	1062	631	1080	870	954	719	541
ENSMUSG00000005674	0	0	0	0	0	0	0	0	0	0	0	0	0	0	0	0	1	4	0	0	0	0	0	0	1	0	0	0	0	0	0	0	0	0	0	0	0	0	0	0	1	2	0	0	0	0	0	1	0
ENSMUSG00000005681	0	0	0	0	0	0	0	0	0	0	0	0	0	0	0	0	0	0	0	0	0	0	0	0	0	0	0	0	0	0	0	0	0	0	0	0	0	0	0	0	0	0	0	0	0	0	0	0	0
ENSMUSG00000005682	944	730	840	1106	651	901	1063	847	790	825	934	1006	790	740	982	937	1054	1292	815	1009	809	954	949	925	1001	778	687	1089	1087	700	844	458	637	575	420	553	647	911	469	574	938	655	773	1046	757	756	616	761	522
ENSMUSG00000005683	1852	1504	1546	1515	1337	1466	1402	1276	1239	1715	1261	1564	1834	2230	2449	2225	2576	2524	2275	1609	1409	1583	1788	1556	1067	997	940	816	1042	896	1184	1043	664	913	779	806	1113	1203	888	923	1182	1277	1036	703	1295	961	1031	1130	3752
ENSMUSG00000005686	1531	2823	1553	2360	1788	1524	1848	1884	1414	1300	2036	2121	1174	1039	1224	1626	1123	1199	978	861	1197	887	1073	1013	1411	1167	1324	2170	1603	1915	2038	1288	1886	1959	1384	1286	633	574	995	915	1214	1126	1056	1110	1250	759	546	700	442
ENSMUSG00000005687	664	530	649	642	799	601	912	759	839	741	1124	1073	834	633	780	801	803	789	750	824	623	874	602	718	920	740	883	1071	920	952	918	699	946	780	728	826	715	741	833	847	879	610	951	1039	878	776	675	629	530
ENSMUSG00000005698	1569	1523	1287	1414	1466	1249	1575	1635	1729	1429	1601	1802	1152	1182	1159	839	1417	1444	1685	1022	1549	1499	1516	1463	1527	1621	1933	1403	1467	1807	1487	1657	1233	1408	1548	1412	1518	1655	1340	1501	1197	1015	1115	1127	1563	1443	1720	1867	1701
ENSMUSG00000005699	82	43	71	138	52	85	73	75	68	63	77	98	91	43	68	77	53	40	39	87	68	17	26	47	87	26	64	84	55	158	25	42	57	89	55	107	102	118	136	42	62	64	66	76	46	21	36	48	27
ENSMUSG00000005705	3	3	1	2	2	1	3	2	3	2	2	8	3	2	2	1	1	3	1	2	2	2	5	2	3	3	3	3	3	2	2	2	2	2	2	2	2	2	2	2	3	3	2	2	3	2	2	2	1
ENSMUSG00000005716	0	0	0	0	0	0	0	0	1	0	2	0	0	0	0	0	0	0	2	0	0	0	0	0	0	0	0	0	0	0	0	0	0	6	0	0	0	0	0	0	0	0	0	0	0	0	0	0	0
ENSMUSG00000005718	1	0	5	2	4	1	6	5	1	8	3	3	20	23	16	3	7	8	6	8	8	3	16	7	6	6	0	3	1	0	1	2	2	2	1	5	8	11	3	2	3	12	9	6	2	3	5	11	4
ENSMUSG00000005732	20	8	10	28	5	3	22	12	0	1	22	11	1	12	22	19	9	9	38	5	14	2	23	9	18	10	10	1	30	21	1	12	7	31	18	2	6	6	35	10	16	24	18	0	11	11	13	11	108
ENSMUSG00000005763	0	7	8	8	17	1	23	4	7	40	3	11	15	2	8	9	16	17	0	5	1	8	1	8	10	10	7	6	35	8	2	0	15	8	3	34	17	31	0	5	4	26	7	10	9	0	0	4	0
ENSMUSG00000005774	100	93	85	41	66	86	59	51	55	87	84	100	104	71	21	44	112	78	48	71	47	69	78	59	33	43	29	30	20	60	73	48	32	41	57	43	48	39	41	14	61	80	58	36	83	45	32	45	157
ENSMUSG00000005779	607	518	360	889	357	259	463	617	210	201	417	540	536	145	211	588	634	267	653	350	338	642	618	255	475	410	680	456	480	362	490	332	401	495	278	585	474	244	459	552	466	344	472	503	422	363	361	409	209
ENSMUSG00000005800	0	0	0	0	0	0	0	0	0	0	0	0	0	0	0	0	0	0	0	0	0	0	0	0	0	0	0	0	0	0	0	0	0	0	0	0	0	0	0	0	0	0	0	0	0	0	0	0	0
ENSMUSG00000005802	582	690	752	618	394	528	488	620	441	489	626	640	406	636	636	612	841	630	790	736	757	753	576	817	513	493	592	530	392	568	411	588	535	654	485	438	514	378	487	566	416	594	594	510	568	571	613	393	132
ENSMUSG00000005803	0	0	0	0	0	0	0	0	0	0	0	0	0	0	0	0	0	0	0	0	0	0	0	0	0	0	0	0	0	0	0	0	0	0	0	0	0	0	0	0	0	1	0	2	0	0	0	0	0
ENSMUSG00000005804	0	0	0	0	0	1	0	0	0	0	0	0	0	2	0	0	0	3	0	0	1	0	2	2	0	0	1	0	2	1	0	0	0	1	0	0	2	0	0	2	0	1	1	0	0	7	0	2	0
ENSMUSG00000005813	148	235	87	386	270	365	339	260	128	234	308	291	215	126	324	157	151	304	96	194	135	114	99	166	223	142	275	257	470	313	419	271	231	273	154	183	140	134	124	158	153	180	208	193	215	253	140	152	264
ENSMUSG00000005823	117	165	128	123	190	181	136	140	183	156	85	124	60	128	107	91	54	113	59	96	178	152	65	114	106	150	149	181	147	94	113	141	221	182	225	201	144	150	187	158	108	143	127	152	178	186	137	159	22
ENSMUSG00000005836	0	1	1	0	0	2	0	3	0	0	0	0	5	0	0	1	5	0	1	0	1	0	2	1	0	0	0	0	0	1	1	2	0	1	0	0	4	1	2	3	2	3	2	2	0	1	4	1	1
ENSMUSG00000005846	7682	7354	6270	8305	9007	7395	7554	8402	7813	8549	8227	9903	7136	6146	6830	7185	7562	6091	8381	7533	7066	7542	6871	7603	8518	8372	8042	7331	8028	8029	8524	7675	8095	7675	6283	7208	8344	6827	6820	7327	5991	6516	6416	6397	6428	8666	6635	7104	3998
ENSMUSG00000005864	5	0	0	25	0	1	0	1	0	0	1	0	3	2	5	11	18	15	0	12	6	8	6	10	1	0	0	4	20	3	0	3	1	1	19	1	0	5	28	0	2	25	13	1	11	0	14	20	7
ENSMUSG00000005871	1929	2073	2067	2382	2313	1599	2073	2125	2166	2018	2408	2416	1694	1843	2046	1787	2098	2515	1952	2061	1392	1829	1585	1892	1819	1885	1837	1875	1833	2137	1695	1988	1835	1988	1701	1637	1278	1680	1182	1580	1873	1607	1572	1536	1919	1538	1703	1716	1677
ENSMUSG00000005873	788	702	509	580	754	668	541	523	585	515	692	491	406	531	374	530	679	507	326	559	426	921	428	593	477	476	414	577	543	373	658	396	475	534	343	413	288	379	224	357	421	421	451	335	464	305	270	424	127
ENSMUSG00000005881	158	19	83	234	79	97	126	22	141	62	50	86	125	45	86	68	90	115	157	88	94	134	86	81	36	90	82	140	100	23	43	157	124	128	51	89	139	125	277	58	72	107	140	82	95	104	171	53	89
ENSMUSG00000005882	217	136	142	196	258	244	186	147	234	224	152	244	163	255	188	168	191	261	82	276	219	207	194	323	243	180	259	272	292	266	237	188	334	222	180	246	249	295	192	296	235	286	222	293	172	283	159	177	96
ENSMUSG00000005883	0	0	0	0	0	2	0	0	0	0	0	0	0	0	0	0	1	1	0	0	0	0	0	0	0	0	0	0	0	0	0	0	0	0	0	0	0	0	0	0	0	0	0	0	0	0	0	0	0
ENSMUSG00000005886	1858	2225	2218	2246	1994	1945	2276	2201	1958	1878	2252	2154	1941	1586	2095	2342	2065	2394	1843	1831	1798	1838	1555	1761	1693	1880	1539	1667	1853	1925	1539	1785	1645	1605	1433	1445	1412	1563	1061	1208	1604	1352	1441	1366	1846	1609	1660	1469	1161
ENSMUSG00000005891	0	0	0	0	0	0	0	0	0	0	0	0	0	0	0	0	0	0	0	0	0	0	0	0	0	0	0	0	0	0	0	0	0	0	0	0	0	0	0	0	0	0	0	0	0	0	0	0	0
ENSMUSG00000005892	41	106	26	114	84	104	109	114	109	53	58	110	35	40	80	30	88	52	15	39	66	99	58	72	91	121	94	84	68	122	112	91	102	88	130	31	113	77	101	96	102	42	9	47	106	56	90	130	86
ENSMUSG00000005893	114	18	21	6	65	71	92	88	161	303	183	147	175	217	89	157	177	101	213	406	141	11	231	308	109	124	69	58	95	263	101	86	202	194	154	349	37	530	175	142	44	130	66	65	56	294	380	108	1017
ENSMUSG00000005897	242	312	191	280	259	323	288	341	144	282	121	223	170	77	117	216	90	82	79	83	72	111	157	131	171	177	181	158	218	252	248	154	190	233	215	190	99	95	103	98	66	149	43	87	62	113	33	99	33
ENSMUSG00000005899	320	91	77	84	218	139	153	58	125	119	68	121	74	294	178	35	115	181	134	150	87	105	218	153	105	178	112	72	21	107	183	172	67	89	116	22	66	220	159	191	206	186	64	133	147	162	74	93	476
ENSMUSG00000005907	401	554	557	548	509	423	593	629	587	603	599	448	425	467	549	447	513	562	576	489	422	440	391	564	477	463	403	364	381	374	458	462	523	554	429	445	494	558	462	498	364	401	396	487	461	531	485	518	139
ENSMUSG00000005917	4	6	8	7	1	0	0	0	2	2	3	2	3	8	3	7	5	8	11	9	6	10	12	1	4	7	3	7	6	4	1	0	4	8	1	4	2	4	0	4	13	24	12	5	21	1	0	8	0
ENSMUSG00000005936	620	473	591	634	545	491	579	309	554	587	629	727	506	350	387	332	326	548	371	457	259	465	273	530	595	603	577	609	488	532	610	586	525	628	543	570	370	422	230	417	469	391	370	419	477	407	480	282	632
ENSMUSG00000005947	3	4	3	3	3	17	4	4	4	3	28	15	3	26	39	3	17	10	3	11	12	3	3	3	4	4	5	3	8	3	3	3	3	4	3	4	3	2	3	4	8	4	9	3	4	4	15	19	204
ENSMUSG00000005949	40	34	48	39	77	56	45	42	55	38	70	56	100	54	31	38	55	92	26	61	45	41	40	60	29	26	30	46	31	39	58	48	60	47	26	29	23	23	55	41	24	26	42	54	28	56	48	28	0
ENSMUSG00000005950	1	0	0	0	0	0	0	0	0	0	0	0	0	0	0	0	1	0	0	0	0	0	0	0	0	0	0	0	0	0	0	0	0	0	0	0	0	0	0	0	0	0	0	0	0	0	0	1	0
ENSMUSG00000005951	2	2	2	2	2	1	2	2	2	2	2	2	2	3	2	2	5	2	2	2	2	2	1	2	2	2	2	2	2	11	2	2	2	2	2	8	2	1	2	2	1	2	2	2	2	2	2	2	0
ENSMUSG00000005952	0	0	0	0	0	0	0	0	2	0	0	0	0	0	0	0	0	0	0	0	0	0	0	0	0	0	0	0	0	0	0	0	0	0	0	0	0	0	0	0	0	0	0	0	0	0	0	1	0
ENSMUSG00000005958	1	1	1	1	1	1	1	1	1	1	1	1	1	1	1	1	3	1	1	1	1	1	1	1	1	1	1	1	1	1	1	1	1	1	1	1	1	1	1	1	1	1	1	1	1	1	1	1	39
ENSMUSG00000005968	295	3	190	283	161	133	292	225	48	163	190	135	230	337	39	145	99	59	186	210	240	74	6	422	171	173	123	331	136	199	210	100	75	181	59	114	165	105	207	236	318	194	91	352	393	490	137	301	264
ENSMUSG00000005973	0	0	0	0	0	1	1	0	0	0	0	0	0	0	2	0	0	0	0	0	0	0	0	0	0	0	0	0	0	1	0	0	0	0	0	0	15	0	0	0	0	0	0	0	0	0	0	0	0
ENSMUSG00000005980	0	0	0	0	0	0	0	0	0	0	0	0	0	0	0	0	1	0	0	0	0	0	0	0	0	0	0	0	0	0	0	0	0	0	0	0	0	0	0	1	0	0	0	0	0	0	0	0	0
ENSMUSG00000005981	254	228	139	95	206	123	113	196	235	113	122	140	117	312	180	246	168	149	160	107	163	133	95	159	154	121	195	154	348	197	312	263	237	377	249	110	91	251	163	166	237	140	174	163	126	72	190	261	141
ENSMUSG00000005982	578	583	642	509	625	678	551	594	605	485	411	427	620	487	407	608	540	667	497	571	607	563	526	622	601	497	508	557	507	404	563	338	441	697	384	307	642	564	723	593	628	434	608	478	688	738	625	501	193
ENSMUSG00000005983	1	0	0	0	1	0	0	0	0	0	0	1	0	0	1	1	1	0	1	1	0	1	1	0	0	0	0	1	0	0	1	0	0	0	0	0	1	1	0	0	1	0	0	0	0	0	0	0	0
ENSMUSG00000005986	3	14	33	3	3	2	2	6	26	3	27	12	3	4	4	3	3	7	3	11	3	3	3	44	8	14	23	43	70	3	103	29	3	3	3	3	3	3	77	6	2	2	2	22	2	3	3	7	0
ENSMUSG00000006005	2733	2967	3291	3920	3088	2899	3522	3012	3112	3552	3630	2947	3359	3911	3465	3828	3814	3333	3876	3657	2866	3423	3044	3596	2847	2964	2715	3325	3193	3840	2898	2875	2830	3200	3063	2726	3182	2965	2247	3504	3092	2756	2651	3152	2842	3084	2622	2058	1447
ENSMUSG00000006010	305	340	468	492	445	422	314	464	380	479	354	381	387	605	525	492	444	512	702	386	816	666	532	472	371	300	377	286	276	461	237	424	688	456	546	685	549	464	618	584	266	431	442	600	436	661	590	586	115
ENSMUSG00000006014	153	82	57	69	65	165	88	181	125	143	107	82	135	145	116	148	178	86	131	200	136	164	177	146	136	70	86	120	62	105	23	143	111	60	63	50	124	117	105	58	108	67	75	43	114	170	93	188	25
ENSMUSG00000006019	1	1	0	22	13	14	7	0	8	0	0	5	54	0	0	13	0	8	3	0	3	8	5	22	0	0	2	9	27	1	45	11	0	16	0	0	3	0	10	13	8	5	7	1	7	0	1	9	0
ENSMUSG00000006021	4	3	4	5	3	2	3	3	3	3	4	4	5	6	5	4	25	4	3	3	2	4	91	7	34	29	2	3	2	4	3	3	3	3	3	3	3	4	3	3	2	1	2	2	23	3	3	4	0
ENSMUSG00000006024	33	36	41	2	30	43	22	65	24	33	53	34	56	83	69	41	61	80	79	30	28	46	35	69	57	48	63	48	67	37	112	71	87	128	2	4	51	65	63	64	51	43	23	118	45	67	36	31	103
ENSMUSG00000006050	16	0	35	15	1	11	21	16	11	10	29	4	35	5	27	94	45	2	3	55	56	9	28	7	28	20	15	32	33	13	3	19	9	44	10	9	45	65	48	41	13	0	26	68	10	27	10	24	13
ENSMUSG00000006056	4	4	6	4	5	5	4	4	5	5	5	5	4	5	7	6	12	13	7	6	6	6	5	5	4	4	4	4	4	5	4	5	5	5	5	5	5	5	5	5	5	5	5	5	5	5	5	6	841
ENSMUSG00000006057	22	6	5	14	10	23	11	2	2	24	8	8	3	86	9	2	8	10	20	10	25	2	2	11	7	5	5	10	2	5	5	11	36	8	2	2	16	17	14	17	46	31	25	36	27	48	9	5	21
ENSMUSG00000006058	206	57	19	22	71	94	195	16	52	134	19	128	92	110	282	19	59	127	361	52	66	157	16	178	145	84	73	62	112	19	214	17	15	363	143	376	202	141	17	123	38	149	150	503	94	328	119	116	128
ENSMUSG00000006095	776	455	247	710	175	694	270	349	559	608	843	482	518	231	256	544	522	502	805	437	607	434	503	413	639	601	628	612	609	883	778	638	259	308	571	887	687	478	747	1024	571	543	402	320	390	559	275	224	185
ENSMUSG00000006127	105	294	6	42	67	186	78	81	39	25	107	118	177	54	10	118	297	106	412	68	81	39	7	30	80	35	28	58	150	106	60	33	82	34	45	50	4	173	181	34	127	90	65	81	85	66	40	27	48
ENSMUSG00000006134	371	548	545	585	664	701	472	494	531	564	493	1024	671	734	416	924	871	715	289	435	641	1083	493	383	274	360	415	537	341	332	430	368	457	447	283	246	387	302	404	464	329	336	349	358	568	434	634	407	557
ENSMUSG00000006143	3	82	10	3	43	14	1	11	10	11	20	22	3	141	24	8	28	22	31	26	12	10	7	20	26	30	61	22	39	33	11	6	7	44	8	55	19	55	24	20	18	18	19	11	34	39	4	20	32
ENSMUSG00000006154	0	0	0	0	0	2	0	0	0	0	0	0	0	0	0	0	0	1	0	0	0	0	0	0	0	0	0	0	0	0	0	0	0	0	0	0	0	0	0	0	0	0	0	0	0	0	0	0	0
ENSMUSG00000006169	256	300	330	267	218	236	180	290	226	239	219	278	284	338	288	358	277	379	316	294	309	256	255	250	115	128	141	96	105	112	127	157	165	186	158	153	177	140	135	165	108	163	151	123	200	238	171	153	86
ENSMUSG00000006179	0	0	0	0	0	0	0	0	0	0	0	0	0	0	0	0	11	3	0	0	0	0	0	0	0	0	0	0	0	0	0	0	0	0	0	0	0	0	0	0	0	1	0	0	0	8	4	0	0
ENSMUSG00000006191	39	71	91	87	66	68	96	31	68	138	93	83	39	124	42	37	20	69	51	46	73	51	32	61	44	115	98	59	106	116	68	143	113	122	173	72	61	75	53	83	40	58	80	76	47	50	114	75	60
ENSMUSG00000006200	0	0	0	0	0	0	0	0	0	0	0	0	2	0	0	0	0	0	0	0	0	0	0	0	0	0	0	0	0	0	0	0	0	0	0	0	0	0	0	0	0	0	0	0	0	0	0	0	0
ENSMUSG00000006205	128	99	153	185	33	46	60	65	56	1	124	33	78	243	204	287	277	177	607	226	219	282	118	77	104	122	124	90	54	77	13	69	31	37	75	71	81	287	113	72	187	154	224	174	74	192	207	146	419
ENSMUSG00000006215	308	20	140	240	131	62	44	63	38	34	11	186	276	114	156	49	106	66	439	29	185	116	57	55	109	94	97	106	74	41	5	4	245	113	73	131	156	71	50	37	320	89	140	37	105	84	57	119	383
ENSMUSG00000006218	1	0	0	1	1	0	1	1	1	1	0	1	0	0	0	0	0	0	0	1	0	1	1	1	1	1	1	1	1	1	1	0	0	0	0	0	1	1	1	0	1	1	1	1	1	1	1	0	0
ENSMUSG00000006219	3	3	2	3	3	3	4	3	4	3	3	3	3	3	3	3	16	6	3	3	3	3	3	3	4	4	4	4	4	3	3	3	3	3	3	3	3	3	3	3	4	4	4	4	4	3	3	3	48
ENSMUSG00000006221	0	0	0	0	0	0	0	0	0	0	0	0	0	0	0	0	0	0	0	7	0	0	0	0	0	0	0	0	0	0	0	0	0	0	0	0	0	0	0	0	0	0	0	0	0	0	0	0	0
ENSMUSG00000006235	0	0	0	0	0	0	0	0	0	0	0	0	0	0	0	0	1	2	0	0	0	0	0	0	0	0	0	0	0	0	0	1	0	0	0	0	0	0	0	0	0	0	0	0	0	0	0	0	0
ENSMUSG00000006241	0	0	0	0	0	0	0	0	0	0	0	0	0	0	0	0	0	0	0	0	0	0	0	0	0	0	0	0	0	0	0	0	0	0	0	0	0	0	0	0	9	0	0	0	0	0	0	0	0
ENSMUSG00000006262	372	377	552	361	311	409	312	295	342	310	413	376	538	667	425	464	899	675	1053	537	258	492	577	462	203	313	269	214	286	263	170	180	195	242	254	159	261	251	204	209	384	251	292	210	438	386	361	302	345
ENSMUSG00000006269	0	0	0	0	0	0	0	0	0	0	0	0	0	0	0	0	0	0	0	0	0	0	0	0	0	0	0	0	1	0	0	0	0	0	1	0	0	0	0	0	0	0	0	0	0	0	0	0	0
ENSMUSG00000006270	0	0	0	0	0	0	0	0	0	0	0	0	0	0	0	0	1	0	0	0	0	0	0	0	0	0	0	0	0	0	0	0	0	0	0	0	0	0	0	0	0	0	0	0	0	0	0	0	0
ENSMUSG00000006273	524	550	654	575	604	834	671	826	815	600	731	756	791	662	455	703	733	651	498	663	631	647	659	709	403	272	307	719	396	430	660	430	471	464	391	383	490	431	601	553	634	443	538	461	592	574	431	457	363
ENSMUSG00000006276	39	20	29	30	25	31	42	13	16	18	30	13	49	23	18	12	21	38	29	15	13	58	18	28	52	19	20	35	29	27	20	40	31	45	30	27	38	38	28	39	57	43	35	12	77	26	21	42	120
ENSMUSG00000006281	54	76	98	40	18	58	13	60	156	68	266	132	34	38	17	27	49	15	122	279	41	54	323	202	45	148	68	25	150	24	28	225	115	169	149	10	229	35	417	324	8	40	113	279	50	479	120	419	84
ENSMUSG00000006288	12	0	5	6	2	3	2	5	2	2	3	0	13	3	13	1	13	3	6	4	3	7	0	4	8	1	3	7	9	8	2	0	5	1	3	7	4	5	0	8	2	13	9	2	7	3	0	2	0
ENSMUSG00000006289	0	1	0	0	0	3	2	0	4	1	1	0	0	8	10	0	0	4	0	0	0	0	1	1	0	0	1	6	1	3	0	0	0	0	0	3	0	13	0	0	1	1	4	0	0	0	0	0	30
ENSMUSG00000006299	187	108	74	151	166	109	141	133	152	128	123	95	63	58	78	75	106	90	58	126	66	80	130	145	214	112	142	169	218	154	164	125	142	81	71	73	80	155	69	66	115	56	76	153	95	61	61	105	122
ENSMUSG00000006301	1972	2438	1395	2049	2527	1931	2257	2836	2940	2172	2024	1755	1265	1475	1401	1140	1307	1566	1488	1226	1369	2056	1951	1977	2943	2198	2708	3159	2507	1980	2157	2033	2742	2091	1857	2518	2191	2548	2268	1802	2003	1776	1733	2028	1867	1933	1516	1843	670
ENSMUSG00000006304	2836	2036	1986	2750	1805	1966	2149	2528	2031	2574	2455	2111	2473	1998	2304	2463	2153	2413	2618	2837	2518	2334	2124	2443	1897	3136	2775	2407	2056	2751	1867	2496	2621	2606	3093	3517	2115	2026	2625	2632	2057	2158	2479	2544	1530	2461	2908	2675	1247
ENSMUSG00000006307	1217	1235	988	1294	2132	1155	1792	1442	1283	1551	1416	1243	1073	1099	1004	1044	1492	1313	921	1745	874	1386	1402	1638	2376	1664	1590	2604	2460	1519	2048	1266	1975	1559	1215	1058	1629	1946	1134	1426	2333	1195	1295	1977	1339	1383	1028	1216	421
ENSMUSG00000006310	263	199	177	186	355	569	234	323	153	565	619	380	141	71	441	23	37	235	17	477	126	21	137	197	362	269	408	323	534	486	411	340	296	16	568	75	305	824	339	346	508	207	173	536	230	699	220	310	32
ENSMUSG00000006311	0	0	0	0	0	0	0	0	0	0	0	0	0	0	0	0	0	0	0	0	0	0	0	0	0	0	0	0	0	0	0	0	0	0	0	0	0	0	0	0	0	0	0	0	0	0	0	0	0
ENSMUSG00000006313	8	9	38	10	7	54	7	67	8	8	8	93	93	82	10	80	26	101	48	22	6	7	114	7	78	81	34	101	224	8	107	7	7	25	7	26	7	30	7	7	4	33	39	96	149	54	9	322	23
ENSMUSG00000006315	98	64	28	2	31	43	41	73	82	45	78	78	90	165	114	81	95	85	164	82	58	64	66	42	59	49	74	87	40	55	58	102	74	31	62	86	116	92	27	19	46	68	112	97	95	71	20	40	86
ENSMUSG00000006333	8	23	7	9	7	5	24	12	5	52	24	63	39	11	20	16	34	67	23	21	23	7	7	34	36	28	9	20	70	61	84	54	26	20	11	71	45	7	6	43	81	68	56	34	21	63	6	39	299
ENSMUSG00000006335	93	235	159	391	225	366	329	266	216	268	131	260	315	204	221	142	224	151	151	205	276	65	491	149	325	356	208	284	368	391	414	338	426	191	267	333	320	471	265	315	276	425	320	362	149	220	312	320	144
ENSMUSG00000006342	0	0	0	0	0	0	0	0	0	0	0	0	0	0	0	0	0	0	0	0	0	0	0	0	0	0	0	0	0	0	0	0	0	0	0	0	0	0	0	0	0	0	0	3	0	0	0	0	0
ENSMUSG00000006344	1	0	0	0	1	0	1	1	1	0	0	0	0	0	0	0	4	0	0	1	0	1	1	1	1	1	1	1	1	0	1	0	0	0	0	0	1	1	0	0	1	1	1	1	1	1	0	0	0
ENSMUSG00000006345	1	0	4	1	4	3	3	7	0	0	10	2	1	1	0	4	1	0	2	0	0	0	0	0	4	0	0	0	0	0	0	0	0	0	0	12	18	0	0	0	0	11	1	4	0	0	0	0	1
ENSMUSG00000006356	27	10	15	32	12	27	35	17	25	5	14	17	32	30	40	10	18	32	54	35	12	20	37	13	12	29	23	29	28	13	13	52	57	10	23	37	34	27	18	25	19	40	38	60	50	17	20	44	32
ENSMUSG00000006360	3	3	3	4	2	7	2	3	2	3	3	3	4	4	3	3	3	3	2	2	2	2	2	2	2	2	2	2	2	3	2	2	2	3	2	3	2	2	2	2	1	1	2	2	2	3	3	3	6
ENSMUSG00000006362	86	154	189	301	324	207	121	120	208	183	238	122	225	85	129	174	168	280	138	131	152	101	78	162	146	157	200	115	181	98	136	147	193	264	194	329	212	89	280	222	46	166	113	295	93	215	216	194	35
ENSMUSG00000006369	6	57	3	82	54	20	11	13	2	3	8	4	41	84	15	8	4	61	33	58	43	2	44	14	33	1	1	2	115	9	3	6	2	2	14	3	80	2	3	66	15	13	27	51	1	3	9	111	8
ENSMUSG00000006373	337	484	477	404	467	361	688	519	487	246	602	536	351	665	435	332	580	386	731	545	147	174	837	404	419	313	434	475	371	486	437	577	401	402	404	532	645	187	305	432	533	212	475	400	521	309	284	524	483
ENSMUSG00000006378	3	12	11	0	18	2	10	0	10	0	0	7	9	50	16	15	0	14	66	22	10	0	19	41	5	20	9	8	0	9	32	0	26	12	2	17	8	5	33	9	7	23	0	0	24	3	5	11	19
ENSMUSG00000006386	134	110	144	102	129	93	123	99	77	66	114	124	64	51	85	22	92	45	12	18	81	174	106	53	101	178	93	77	92	81	102	42	79	75	62	116	95	123	109	52	71	165	99	65	90	162	89	105	165
ENSMUSG00000006389	0	0	0	0	0	0	0	0	0	0	0	0	0	0	0	0	0	1	0	0	0	0	0	0	0	0	0	0	0	0	0	0	0	0	0	0	0	2	0	0	0	1	0	0	0	0	0	0	1
ENSMUSG00000006390	109	94	47	131	104	180	105	99	108	85	74	46	79	68	71	49	91	53	89	87	61	66	144	102	153	146	148	164	151	120	234	128	127	173	90	132	209	93	243	91	210	238	134	152	160	165	85	184	41
ENSMUSG00000006392	38	56	13	12	86	25	16	38	42	31	54	70	13	46	37	42	58	53	13	21	21	16	19	28	30	39	31	42	50	13	32	23	79	28	6	52	19	3	19	41	12	13	18	31	25	34	25	19	3
ENSMUSG00000006395	0	0	5	0	0	0	0	0	0	0	0	1	0	0	0	2	0	0	0	0	0	1	0	0	1	0	0	0	0	0	0	0	0	0	0	0	0	0	0	0	0	0	0	0	0	0	0	0	0
ENSMUSG00000006398	2020	3177	1541	3478	2204	1542	2742	1914	2037	2037	2998	3149	1734	1592	2492	1999	1923	2064	1783	2016	1734	1991	2542	2288	2624	2107	2199	2598	3243	1989	2240	1922	1782	1920	1507	1817	2675	2466	2000	2080	2972	2170	1829	2632	2070	1648	1438	2286	967
ENSMUSG00000006403	18	48	65	18	38	47	38	51	48	36	37	20	57	75	21	30	39	65	19	34	23	22	41	35	44	20	56	65	51	43	48	26	51	20	19	26	24	38	19	63	51	34	37	46	50	48	42	40	1
ENSMUSG00000006411	0	0	0	0	0	0	0	0	0	0	0	0	0	0	0	0	2	2	0	0	0	0	0	0	0	0	0	0	0	0	0	0	0	0	0	0	0	0	0	0	0	0	1	0	0	0	0	1	0
ENSMUSG00000006412	145	121	115	150	165	154	208	182	184	224	229	210	185	155	164	143	143	136	107	190	163	131	168	188	206	208	219	219	209	190	156	222	257	175	205	280	235	281	215	213	123	108	176	274	129	210	164	199	43
ENSMUSG00000006418	10117	11503	10560	9592	8463	9264	11732	12556	12535	10644	10504	10340	10385	10709	9665	10254	9380	10224	8195	9603	9514	10589	9778	10836	10581	9168	9396	12024	12696	7363	9810	9222	10208	10097	9432	9536	9725	10602	9495	10159	10181	7932	9609	9141	9476	9039	7883	9349	1402
ENSMUSG00000006423	105	45	97	129	80	53	87	96	98	112	98	83	90	115	84	89	97	84	152	88	99	40	91	72	59	77	82	61	72	126	34	87	60	81	154	121	110	52	117	69	66	60	87	68	48	88	140	95	43
ENSMUSG00000006435	3	3	2	3	16	3	29	3	3	3	3	3	3	3	3	23	6	3	3	3	3	4	51	25	8	32	3	4	35	3	3	3	15	23	3	59	4	4	102	3	31	4	3	3	3	3	32	7	2
ENSMUSG00000006442	202	5	26	132	22	9	3	27	47	4	49	70	9	11	100	12	32	15	131	46	36	5	4	4	48	53	2	50	170	6	11	4	4	37	23	14	26	5	4	83	62	60	80	54	25	49	3	21	64
ENSMUSG00000006445	0	0	0	1	2	0	0	1	2	5	0	4	1	2	9	0	3	8	3	5	5	0	0	3	0	2	0	5	1	3	2	0	3	1	2	0	10	4	4	3	3	1	0	3	6	0	2	0	22
ENSMUSG00000006456	457	427	350	558	441	281	432	496	366	382	384	479	288	295	341	381	265	342	332	364	271	321	347	351	518	421	389	525	514	401	489	327	525	510	357	383	415	448	332	437	505	378	369	566	338	367	249	331	92
ENSMUSG00000006457	177	64	17	299	79	86	46	45	13	50	3	46	4	6	109	120	30	55	71	13	67	3	29	2	43	58	25	22	55	83	3	2	2	2	34	31	51	54	143	63	109	63	78	37	108	214	70	60	183
ENSMUSG00000006462	0	0	0	0	0	0	0	0	0	0	0	0	0	0	0	0	0	1	0	0	0	0	0	0	0	0	0	0	0	0	0	0	0	0	0	0	0	0	0	0	0	0	0	0	0	0	0	0	2
ENSMUSG00000006463	606	697	818	765	671	671	742	876	910	924	774	819	518	664	508	648	568	906	702	679	627	639	616	823	485	508	522	499	583	522	525	575	664	571	535	617	480	457	441	420	295	538	485	467	439	538	551	436	5
ENSMUSG00000006464	2	2	2	2	2	19	2	2	3	2	2	2	2	2	2	2	8	5	2	2	2	2	2	2	2	3	3	2	2	2	2	2	2	2	2	2	5	1	2	3	2	3	3	2	3	3	3	2	0
ENSMUSG00000006469	1	1	1	25	1	1	1	1	1	1	1	1	1	1	1	1	1	1	1	11	1	1	1	1	0	1	1	1	1	1	1	1	1	1	1	1	1	1	1	1	14	2	1	1	1	1	1	1	0
ENSMUSG00000006471	1	21	3	4	0	2	0	0	0	0	5	0	0	0	0	4	1	11	0	0	2	0	1	0	0	0	4	0	4	14	0	0	6	0	7	15	0	0	0	9	9	2	2	0	2	9	0	2	129
ENSMUSG00000006476	0	1	0	0	5	2	1	1	17	0	8	0	1	1	0	0	1	15	0	0	0	0	17	2	1	1	1	0	1	0	0	0	0	1	1	1	0	24	0	1	0	2	13	0	1	1	1	0	0
ENSMUSG00000006490	0	0	0	0	0	0	0	0	0	0	0	0	0	0	0	0	0	0	0	0	0	0	0	0	0	0	0	0	0	0	0	0	0	0	0	0	0	0	0	0	0	0	0	0	0	0	0	0	0
ENSMUSG00000006494	577	765	861	1094	955	804	812	766	877	953	762	720	755	1188	775	861	875	992	920	1021	877	924	1212	1090	881	764	773	928	750	888	833	658	1109	844	746	1081	840	676	707	1298	967	1012	1013	716	780	1245	695	582	241
ENSMUSG00000006498	3660	3708	3065	3532	3345	3108	3410	4116	3364	3011	2281	3774	2862	3074	3333	3693	3630	3688	3492	3094	3672	4327	3849	3253	3466	2057	2438	3728	3230	2817	2583	1682	2174	2530	1423	2178	4366	3755	4433	3639	3304	3322	2657	3300	4028	3586	2345	3282	2597
ENSMUSG00000006517	2	27	3	1	15	40	54	29	10	57	2	3	1	28	97	5	5	82	7	31	2	5	6	67	113	7	16	100	11	45	123	114	10	4	7	1	2	8	59	37	16	5	1	56	30	5	32	65	0
ENSMUSG00000006519	0	0	0	0	1	0	0	0	0	0	0	0	0	0	0	0	1	0	0	0	0	0	0	0	0	0	0	5	0	0	0	0	0	0	1	0	0	0	0	0	0	0	0	0	0	0	0	0	0
ENSMUSG00000006522	1	1	2	2	1	1	13	1	1	2	2	2	2	2	2	2	2	2	2	1	1	2	1	1	1	1	1	1	1	2	1	2	1	1	1	2	1	1	1	1	1	1	7	1	1	1	1	2	0
ENSMUSG00000006526	0	8	16	12	22	25	8	21	20	34	11	30	24	29	19	17	18	0	7	8	10	29	0	6	12	12	12	34	24	18	0	14	14	34	15	21	11	14	0	12	2	0	23	17	12	13	7	3	16
ENSMUSG00000006527	3017	3883	3135	3984	3871	3458	4032	3581	3596	3889	3929	3435	2483	2696	3062	2523	3263	3007	2724	2754	2990	2691	3100	3500	3939	4566	4568	4247	4481	3841	4342	4616	3733	3862	4160	3974	3333	3299	3212	3533	2699	2947	3238	3586	2919	3355	3631	3845	1924
ENSMUSG00000006529	0	0	0	0	0	0	0	0	0	0	0	0	0	0	0	0	0	1	0	0	0	0	0	0	0	0	0	0	0	0	0	0	0	0	0	0	0	0	0	0	0	0	0	0	0	0	0	1	0
ENSMUSG00000006538	0	0	0	0	0	0	0	0	0	0	0	0	0	0	0	0	0	0	0	0	0	0	0	0	0	0	0	0	0	0	0	0	0	0	0	0	0	0	0	0	0	0	0	0	0	0	0	0	0
ENSMUSG00000006542	0	0	0	0	0	0	0	0	0	0	0	0	0	0	0	0	0	3	0	0	0	0	0	0	0	0	0	0	0	0	0	0	0	0	0	0	0	0	0	0	0	0	0	0	0	0	0	0	0
ENSMUSG00000006546	1	1	0	1	0	0	0	0	0	0	0	1	1	1	1	0	1	0	0	0	0	0	0	0	0	0	0	0	0	1	0	0	0	0	0	0	0	0	0	0	7	0	11	0	0	0	0	0	0
ENSMUSG00000006567	17	0	0	0	1	2	0	2	0	0	2	0	0	0	0	0	0	1	1	1	0	0	6	16	0	0	1	0	0	1	0	0	0	0	0	0	12	0	0	11	0	0	0	0	4	0	4	3	0
ENSMUSG00000006574	4	4	4	5	4	4	4	4	4	4	5	5	5	5	5	5	5	52	5	4	4	5	5	4	4	3	4	4	46	5	4	4	4	4	4	4	5	5	4	4	4	4	4	4	4	4	4	5	0
ENSMUSG00000006575	1	6	0	73	3	22	5	2	22	10	23	7	5	1	1	1	1	5	1	8	0	3	1	29	15	4	16	1	1	1	14	1	39	19	0	17	9	41	1	7	0	1	19	10	0	1	0	1	0
ENSMUSG00000006576	15	3	1	3	1	21	2	16	3	7	2	1	4	19	1	14	14	38	15	3	15	1	1	10	2	2	13	93	5	19	1	4	26	22	30	27	13	11	2	22	3	3	22	39	15	2	21	5	13
ENSMUSG00000006585	1078	800	740	718	594	681	748	557	599	720	856	803	777	977	793	922	799	1003	1338	799	623	765	713	722	1095	1042	973	925	1052	677	686	752	775	469	687	588	758	851	657	684	1013	679	681	826	708	513	470	870	548
ENSMUSG00000006586	1123	1539	1438	1432	1208	1181	961	1355	1396	1432	1048	845	981	772	1124	878	858	806	1267	729	1077	1103	687	699	811	1336	1052	811	736	1339	742	1329	1065	1028	1362	1239	599	483	630	608	632	654	553	459	783	543	938	1028	279
ENSMUSG00000006587	70	58	28	125	39	44	72	181	98	44	63	86	33	25	48	39	41	96	178	110	62	3	30	125	84	97	77	133	103	189	172	159	150	59	66	29	166	85	100	100	96	79	39	71	98	72	51	106	62
ENSMUSG00000006589	497	566	312	31	320	12	887	824	259	206	750	113	265	131	1119	1009	420	434	1270	883	767	559	694	649	403	553	284	1088	625	900	248	576	951	78	23	159	229	902	1104	944	1020	152	179	1030	243	560	655	759	228
ENSMUSG00000006599	410	461	636	469	247	369	314	427	450	365	531	437	495	341	522	434	373	448	923	489	477	294	281	567	370	600	486	387	399	560	414	506	529	508	678	610	267	317	389	510	253	365	539	344	295	360	462	575	635
ENSMUSG00000006611	2	2	2	2	2	6	1	2	2	2	2	2	2	2	2	2	2	2	2	2	2	2	1	2	1	1	1	1	1	2	1	2	2	2	2	2	2	1	2	2	1	1	1	1	11	2	2	2	0
ENSMUSG00000006641	69	49	123	43	33	77	83	62	64	2	8	30	87	140	57	87	207	57	121	122	149	85	145	151	132	42	53	18	24	80	11	29	43	143	74	82	60	105	145	59	94	16	35	147	93	36	78	134	484
ENSMUSG00000006642	0	0	0	0	0	0	0	0	0	0	0	0	0	0	0	0	0	1	0	0	0	0	0	0	0	0	0	0	0	0	0	0	0	0	0	0	0	0	0	0	0	0	0	0	0	0	0	0	0
ENSMUSG00000006649	1	1	1	1	1	9	1	1	1	1	1	1	1	1	1	1	4	0	0	0	0	0	0	1	1	1	1	1	1	6	1	1	1	1	1	1	1	0	1	1	0	2	0	0	1	1	1	2	0
ENSMUSG00000006651	22	12	8	1	1	3	1	1	0	1	1	2	5	1	1	1	1	0	53	8	0	1	1	16	0	7	9	12	10	8	1	6	5	4	0	1	18	4	7	0	18	1	12	28	14	7	0	1	0
ENSMUSG00000006673	6	3	30	5	12	10	9	15	41	7	22	86	11	105	43	21	47	38	20	59	4	67	73	41	2	17	40	9	22	6	3	12	6	18	52	27	61	27	43	34	39	31	50	21	34	7	49	49	462
ENSMUSG00000006675	1	2	1	1	1	4	6	2	2	1	1	1	2	2	1	1	3	6	1	1	1	1	1	1	1	4	2	1	1	1	1	1	1	1	1	1	1	25	1	1	1	1	3	1	1	1	1	3	0
ENSMUSG00000006676	2206	1821	2013	1675	1913	1818	2352	1883	1765	1781	1872	1609	1899	2002	1896	2035	1962	2714	1079	2150	1524	1431	2129	2138	2180	1750	1784	2393	2225	1444	2402	1516	1985	1695	1261	1451	1379	1578	1278	1427	1738	1213	1449	1509	1435	1212	1301	1207	342
ENSMUSG00000006678	351	290	248	265	207	292	328	274	348	431	305	325	251	380	395	375	318	328	534	351	350	356	433	333	268	392	331	234	245	437	197	326	211	384	304	351	390	386	284	352	193	292	399	343	248	527	506	430	185
ENSMUSG00000006699	400	360	444	243	542	525	361	395	461	529	668	639	1008	936	502	487	400	454	393	651	676	772	763	693	132	195	263	378	195	427	254	372	375	457	376	380	538	410	691	532	579	545	664	501	714	578	416	529	679
ENSMUSG00000006705	115	67	60	227	5	220	226	158	129	37	173	11	9	74	4	365	19	227	116	254	116	144	113	190	342	47	103	166	108	80	311	172	200	363	182	5	288	128	154	185	10	113	4	145	138	439	413	149	131
ENSMUSG00000006711	1	0	3	6	0	15	2	0	7	0	2	0	3	0	0	9	7	3	0	12	0	0	0	2	0	2	1	13	10	0	0	0	20	14	2	18	0	1	0	0	2	0	0	0	6	0	10	0	1
ENSMUSG00000006715	1787	1619	1011	1878	2593	1298	2789	2098	1950	2481	2913	2565	1060	1171	1171	1228	1444	1136	983	2259	975	1506	1107	1707	2631	2014	1830	3760	3779	2560	2383	2140	2515	1874	1723	1929	1961	2504	1081	1323	2357	1335	2031	3034	1513	1496	1256	1623	1195
ENSMUSG00000006717	183	210	26	15	122	25	114	67	7	20	42	99	16	19	14	5	87	27	27	21	31	131	17	64	21	52	21	5	12	87	108	75	66	52	81	6	11	43	18	146	42	47	26	3	115	7	94	4	56
ENSMUSG00000006720	0	10	18	15	16	15	11	13	8	14	28	21	24	29	18	7	8	8	10	15	17	0	7	9	9	9	13	4	15	15	7	11	24	7	33	9	17	22	2	18	17	19	6	11	11	17	9	16	0
ENSMUSG00000006724	0	0	0	2	3	1	0	0	0	2	0	0	3	1	1	1	3	5	0	3	0	0	1	3	3	4	0	2	5	0	6	0	0	0	0	4	3	6	1	0	1	9	0	0	6	2	0	2	0
ENSMUSG00000006728	12	12	12	15	9	6	35	9	162	125	59	12	16	20	15	11	12	44	20	9	16	10	8	9	96	6	174	181	45	12	38	41	9	31	9	66	9	111	9	145	22	16	72	7	7	10	22	56	49
ENSMUSG00000006731	0	0	0	0	0	0	0	2	3	0	0	0	0	0	1	0	2	1	1	0	0	0	0	0	0	0	0	0	0	0	10	0	0	0	0	0	0	0	0	0	0	0	3	0	0	0	0	0	1
ENSMUSG00000006732	1303	1124	1000	950	1403	1018	1172	971	1094	1351	899	1055	931	558	576	1417	495	658	628	707	831	862	378	1281	1379	1696	1948	1130	1084	1219	972	1267	1564	1836	1826	2170	1266	1238	1846	1674	674	1003	1185	950	772	1494	1283	711	18
ENSMUSG00000006736	11	96	7	40	150	3	41	4	42	11	7	9	11	16	11	8	9	14	26	17	25	95	6	4	23	19	1	4	3	9	7	4	5	84	20	4	5	8	5	3	1	38	6	3	2	4	3	6	50
ENSMUSG00000006740	2515	2890	3446	2575	2311	2324	2346	2808	2543	2778	2769	2429	2246	2372	2788	2691	2782	3104	3578	2536	2394	2442	2132	2464	2566	3024	2624	2634	2497	3025	2146	2826	2760	3404	3361	3239	1901	1501	2451	2480	2091	2301	2483	2553	1924	2079	2315	2053	965
ENSMUSG00000006763	2	0	1	0	1	1	0	1	0	0	0	0	1	0	0	1	1	0	0	0	1	0	0	0	0	3	4	0	1	2	0	1	1	0	1	0	2	0	0	0	0	0	0	1	0	0	0	0	0
ENSMUSG00000006764	0	34	12	47	46	8	14	43	26	21	22	16	6	77	27	43	37	26	21	27	20	17	24	39	43	2	46	16	12	8	3	24	18	0	15	16	69	80	47	19	38	28	33	19	41	34	54	86	43
ENSMUSG00000006777	0	0	0	0	0	0	1	2	0	0	0	0	0	0	4	1	0	0	0	0	0	0	0	0	0	1	0	0	0	0	0	0	1	0	0	0	0	0	1	0	0	0	0	0	0	0	0	0	0
ENSMUSG00000006782	1	1	2	1	2	18	2	2	2	14	2	2	43	1	2	2	2	8	3	6	3	2	2	2	21	3	3	2	7	1	57	2	2	2	6	2	20	26	2	6	8	10	13	3	16	27	3	2	0
ENSMUSG00000006784	0	2	0	0	0	1	0	0	0	0	0	0	0	0	0	0	0	0	0	0	0	0	0	0	0	0	0	0	0	0	0	0	0	0	0	0	0	0	0	0	0	0	0	0	0	0	0	0	0
ENSMUSG00000006800	57	19	80	85	60	27	43	40	38	15	113	27	90	32	46	67	17	44	83	43	44	20	2	21	49	60	12	74	25	27	25	46	52	7	65	54	42	11	33	32	64	58	29	4	2	11	34	24	845
ENSMUSG00000006818	819	620	764	734	730	774	840	664	683	478	848	859	785	708	653	579	926	761	622	824	765	517	726	732	770	859	966	804	568	654	678	663	727	1004	839	1128	638	486	761	805	510	514	711	845	455	564	690	669	883
ENSMUSG00000006850	25	54	26	61	48	30	50	21	39	59	36	40	26	30	28	41	32	41	13	54	30	29	20	35	34	40	43	43	34	23	27	34	63	59	32	27	30	31	23	51	38	52	48	60	32	24	33	24	0
ENSMUSG00000006906	167	155	129	165	142	147	155	157	179	211	160	125	162	195	81	88	167	151	258	191	173	172	138	171	171	185	153	127	111	160	147	223	168	132	193	157	167	177	229	171	166	143	156	148	89	214	153	227	128
ENSMUSG00000006920	782	806	1214	1094	1055	1059	1027	1150	1155	900	970	1002	663	752	784	741	862	932	468	1023	888	921	629	994	1143	1088	1177	1448	1295	1113	1511	1257	1319	818	1010	1282	976	1064	759	1049	1110	840	914	1085	1182	1009	869	918	453
ENSMUSG00000006930	0	0	0	0	4	0	0	0	0	0	0	0	0	0	2	0	3	0	0	0	0	0	0	0	0	4	0	0	0	5	1	0	0	0	0	0	0	0	0	0	0	0	0	0	0	2	0	2	0
ENSMUSG00000006931	0	0	0	0	0	0	0	0	0	0	0	0	0	0	0	0	3	0	0	0	0	0	0	0	0	0	0	0	0	0	0	0	0	0	0	0	0	0	0	0	0	0	0	0	0	0	0	1	9
ENSMUSG00000006932	4183	4037	3438	3894	4488	4772	4431	4718	4243	4119	4502	5870	3484	2784	2642	2923	2689	3050	2595	3668	3454	3955	3372	3551	4707	3996	3585	5747	5288	3788	4557	4209	4243	4200	4237	3958	3653	3958	3503	4134	4568	4139	4266	4178	4579	3478	3162	2939	234
ENSMUSG00000006941	432	394	586	340	402	446	420	550	569	335	528	387	741	469	893	656	621	721	790	848	825	404	580	370	603	819	798	557	573	398	388	401	488	412	382	548	335	436	458	347	293	259	373	563	252	568	494	937	252
ENSMUSG00000006948	0	0	0	0	0	0	0	0	0	0	0	0	0	0	0	0	1	0	0	0	0	0	0	0	0	0	0	0	0	0	0	0	0	0	0	0	0	0	0	0	0	0	0	0	0	0	0	0	0
ENSMUSG00000006958	0	0	0	0	0	0	0	0	0	0	0	0	0	0	0	0	0	0	3	0	0	0	0	0	0	0	0	0	0	0	0	0	0	0	0	0	0	0	0	0	0	0	0	0	0	0	0	0	0
ENSMUSG00000006998	440	533	485	638	411	522	446	506	456	423	406	400	372	458	408	357	447	408	233	427	373	604	471	463	689	384	475	612	588	465	608	368	544	383	484	437	479	675	545	589	698	457	394	569	540	463	377	406	221
ENSMUSG00000007021	155	253	174	211	171	110	223	243	184	174	147	207	147	195	246	72	58	73	414	95	155	168	130	150	276	193	159	151	309	154	313	186	195	278	164	293	257	215	188	224	322	254	162	143	312	131	208	289	107
ENSMUSG00000007029	0	0	0	0	0	0	0	0	0	0	0	0	0	0	0	0	0	0	0	0	0	0	0	0	0	0	0	0	0	0	0	0	0	0	0	0	0	0	0	0	0	0	0	0	0	0	0	0	0
ENSMUSG00000007030	3	0	0	0	2	0	0	0	0	0	2	0	0	0	0	0	2	1	0	1	0	0	0	2	2	0	0	2	5	0	0	2	0	0	3	10	0	0	0	2	5	0	0	4	0	0	0	0	0
ENSMUSG00000007033	0	0	0	0	0	0	0	0	0	0	0	0	0	0	0	0	0	0	0	0	0	0	2	0	0	0	0	0	0	0	0	0	0	0	0	0	0	0	0	0	0	0	0	0	0	0	0	0	0
ENSMUSG00000007034	153	42	45	66	18	48	63	34	80	46	51	54	5	26	36	66	53	5	37	36	38	66	95	65	52	33	23	59	45	40	74	50	45	29	25	44	67	38	37	22	37	76	54	32	40	75	40	48	77
ENSMUSG00000007035	14	43	0	51	103	39	22	44	19	41	5	103	14	69	33	48	11	36	49	67	60	111	65	42	34	35	45	61	99	52	9	41	51	10	2	13	37	203	1	8	1	41	50	128	27	102	26	73	48
ENSMUSG00000007036	1891	1439	2155	1595	1484	1712	2167	1945	1789	1838	1457	1691	1774	1888	2119	1695	2083	2455	1750	1703	1870	1465	1493	2430	1715	1560	1512	1742	1678	1174	1590	1264	1543	1302	1141	1489	1427	1399	1278	1552	1724	1527	1420	1376	1772	1184	1365	1515	260
ENSMUSG00000007038	24	35	41	30	218	28	17	24	30	11	59	75	45	40	4	106	9	73	30	21	64	86	2	61	19	27	32	11	21	10	32	70	50	41	18	11	108	54	139	64	4	46	65	104	13	20	19	3	56
ENSMUSG00000007039	4	4	4	4	4	4	4	4	4	4	4	4	4	5	5	4	4	4	5	4	4	4	4	4	4	4	4	4	4	4	4	4	4	4	4	4	4	4	4	4	4	4	4	4	4	4	5	10	40
ENSMUSG00000007041	1	0	0	0	0	0	0	0	0	3	0	1	0	0	1	1	1	2	1	6	0	1	1	0	0	0	0	0	0	0	0	0	0	0	0	0	0	1	0	13	1	0	0	0	0	0	0	0	11
ENSMUSG00000007050	144	107	101	84	60	51	65	66	35	69	93	87	73	114	119	75	81	115	167	81	89	57	51	93	105	125	76	66	121	73	85	94	137	138	107	86	83	59	84	76	70	108	110	87	76	50	79	122	142
ENSMUSG00000007080	244	53	198	55	57	173	86	46	93	59	112	39	77	338	37	7	247	88	282	13	198	221	76	41	53	97	104	48	95	6	6	237	34	172	142	5	211	632	312	159	118	114	164	19	160	82	158	146	60
ENSMUSG00000007097	1	0	0	1	1	0	0	0	0	0	1	1	1	1	1	1	4	5	0	0	0	1	1	0	0	5	0	0	0	1	1	0	0	0	0	0	1	1	0	0	0	1	0	0	3	0	0	2	0
ENSMUSG00000007107	0	0	0	0	0	0	0	0	0	0	0	0	0	0	0	0	0	0	0	0	0	0	0	0	0	0	0	0	0	0	0	0	0	0	0	0	0	0	0	0	0	0	0	0	0	0	0	1	0
ENSMUSG00000007207	61	35	25	29	84	16	87	29	26	31	49	41	48	25	39	58	18	9	8	81	58	9	35	45	58	14	26	90	124	22	90	87	129	59	29	25	43	23	26	35	86	37	28	122	109	65	35	135	1
ENSMUSG00000007209	0	0	0	0	0	0	0	0	0	0	0	0	0	0	0	0	0	0	0	0	0	0	0	0	0	0	0	0	0	0	0	0	0	0	0	0	0	0	0	0	0	0	0	0	0	0	0	0	0
ENSMUSG00000007216	14	488	572	98	263	287	121	333	156	146	63	121	647	148	237	390	165	77	478	422	163	29	27	236	138	245	277	93	203	38	399	302	728	273	179	16	235	722	800	253	270	57	33	175	434	334	710	200	804
ENSMUSG00000007279	1	1	1	1	1	4	0	0	0	1	1	1	1	1	1	12	3	2	1	1	0	1	1	1	13	7	0	1	0	1	1	1	1	0	0	1	1	1	1	0	0	0	0	0	0	9	0	1	0
ENSMUSG00000007338	70	110	113	65	57	77	21	90	76	114	83	25	2	8	57	3	7	111	4	10	3	57	49	102	22	62	56	51	63	35	11	3	104	3	3	3	20	62	2	92	2	47	15	11	3	50	55	47	79
ENSMUSG00000007379	15	12	7	16	10	73	9	10	10	10	10	11	16	17	11	9	63	84	7	17	6	9	9	9	9	8	9	11	10	24	11	8	8	9	7	9	10	10	9	8	14	69	73	8	8	10	9	45	23
ENSMUSG00000007411	761	729	383	1076	346	437	446	355	581	261	435	412	522	273	159	316	264	346	304	460	260	394	305	243	659	359	459	455	388	579	252	281	231	443	338	448	302	451	308	314	446	351	474	353	282	374	332	284	89
ENSMUSG00000007415	10	8	4	19	25	14	16	12	30	16	21	19	15	12	11	19	17	11	21	16	14	14	11	11	16	8	18	22	16	29	14	11	9	40	24	16	19	16	10	30	25	9	19	21	17	17	23	18	18
ENSMUSG00000007440	0	0	0	0	0	0	0	0	0	0	0	0	0	0	0	0	3	2	0	0	0	0	0	0	0	0	0	0	0	0	0	0	0	0	0	0	0	0	0	0	0	0	0	0	0	0	0	0	0
ENSMUSG00000007457	5	3	3	6	16	5	5	9	5	7	5	0	7	2	18	15	8	10	3	4	26	0	0	2	1	0	6	5	6	7	0	38	7	15	9	12	0	0	4	13	1	3	15	0	0	7	14	5	0
ENSMUSG00000007458	11	49	28	46	26	26	33	12	21	31	24	27	14	187	36	24	37	42	69	40	42	38	38	51	7	47	41	36	33	48	60	22	60	20	6	37	31	20	35	47	69	81	64	32	45	52	15	52	316
ENSMUSG00000007476	400	338	515	326	466	487	465	332	413	436	547	368	656	643	617	700	566	681	660	465	552	515	529	639	268	416	358	429	272	497	462	530	459	716	634	601	623	519	679	541	1069	874	821	824	863	646	641	530	139
ENSMUSG00000007480	0	0	0	0	0	0	0	0	0	0	0	0	0	0	0	0	0	1	0	0	0	0	0	0	0	0	0	0	0	0	0	0	0	0	0	0	0	0	0	0	0	0	0	0	0	0	0	0	0
ENSMUSG00000007564	1379	2070	1478	2376	2060	1931	2549	2404	2098	2200	2329	2098	1626	1839	1622	1835	1700	2036	1236	2124	1569	1703	1705	1839	2680	1748	1899	2827	2833	2008	2321	1589	2139	1818	1402	1772	1836	2335	1889	1881	2378	1505	1763	2687	1933	1824	1250	1496	383
ENSMUSG00000007570	66	78	70	21	75	92	98	137	15	82	38	34	43	87	37	126	110	52	63	36	102	106	18	81	107	81	15	73	169	81	52	45	79	92	39	4	13	83	94	6	49	65	14	27	39	32	76	96	2
ENSMUSG00000007589	2120	2370	1970	1796	1745	2271	1970	2620	2620	1885	2208	2252	2535	2091	2684	2402	2223	2405	2474	2295	2265	2012	1973	2317	3052	2486	3123	2375	2258	2364	2380	2204	2222	2557	1862	2392	2467	1991	2793	2782	2327	1662	2311	2229	1671	2113	1821	2353	1122
ENSMUSG00000007594	1	0	0	0	1	1	1	0	0	0	1	1	0	0	0	1	0	0	1	1	1	1	1	1	1	1	1	1	1	1	1	0	1	0	0	0	1	1	1	0	1	1	1	1	1	0	0	0	0
ENSMUSG00000007603	15	10	12	2	40	27	27	22	26	28	3	9	11	90	18	0	6	58	13	63	38	1	1	48	3	23	11	1	6	10	81	6	30	8	35	37	47	43	23	76	15	22	37	27	13	17	23	49	7
ENSMUSG00000007610	670	500	337	79	91	214	400	138	90	214	199	333	173	657	389	518	20	221	161	22	71	73	174	438	73	255	30	95	146	654	151	435	87	268	502	778	486	55	786	109	688	674	454	241	87	29	353	23	152
ENSMUSG00000007613	687	609	863	511	806	816	564	641	752	682	935	824	1307	1218	975	781	1482	1337	870	823	923	969	1240	937	408	453	601	682	462	885	477	517	587	546	531	314	642	757	542	819	726	473	694	681	1048	572	824	452	222
ENSMUSG00000007617	409	430	624	498	284	421	331	390	335	407	367	414	438	420	321	469	543	477	519	351	326	386	205	321	248	310	238	296	278	274	215	319	214	303	298	199	221	203	160	220	229	308	258	224	342	281	356	238	334
ENSMUSG00000007646	6	4	3	0	6	10	1	3	6	9	10	6	9	8	7	9	8	9	12	12	13	13	7	9	3	1	4	3	2	4	3	4	6	7	2	12	7	2	1	6	3	1	2	4	7	8	6	2	24
ENSMUSG00000007653	0	0	0	0	0	0	0	6	0	8	0	0	0	0	0	16	0	1	0	0	0	0	0	0	7	2	0	0	0	8	0	0	0	0	0	0	0	0	0	3	0	0	0	0	0	0	0	2	0
ENSMUSG00000007655	3	4	3	4	28	1	31	3	3	3	3	21	5	6	3	23	3	2	2	7	2	2	1	14	2	2	2	2	2	3	2	3	8	3	17	3	2	17	2	2	24	1	60	16	2	3	12	2	0
ENSMUSG00000007656	378	315	454	327	306	337	310	300	275	287	349	313	442	359	324	392	460	424	446	326	344	325	244	343	244	232	267	234	281	308	208	233	258	234	284	194	207	191	211	222	265	227	221	208	304	237	237	222	671
ENSMUSG00000007659	723	796	730	751	875	828	1075	876	934	842	747	795	678	553	563	423	622	672	442	590	638	657	1042	873	1105	1052	1049	1187	1045	781	987	863	1121	783	561	890	1206	1463	1116	639	1089	864	682	939	1132	892	744	993	425
ENSMUSG00000007670	48	75	81	21	59	32	66	60	67	103	79	97	67	34	39	38	35	28	23	53	72	43	52	110	27	66	32	40	60	44	55	120	90	152	116	135	84	101	96	80	45	73	89	120	48	100	107	115	101
ENSMUSG00000007682	55	49	18	19	26	19	28	52	124	12	24	20	0	9	22	15	31	15	10	22	12	24	10	16	33	21	27	10	8	24	39	20	54	25	46	10	20	8	0	6	14	5	4	51	29	103	37	18	0
ENSMUSG00000007721	145	64	32	117	158	113	128	53	63	29	69	112	5	82	55	8	9	85	112	6	18	102	51	105	45	99	65	52	84	53	36	65	4	108	64	3	81	87	90	35	28	60	31	71	56	55	111	28	75
ENSMUSG00000007739	473	285	336	136	220	312	172	305	446	278	249	294	202	180	209	182	310	300	291	156	185	254	461	313	433	197	495	242	151	216	348	179	215	272	239	388	232	217	268	259	364	217	208	241	241	207	345	279	166
ENSMUSG00000007777	49	9	11	1	6	4	25	13	3	19	12	13	28	8	17	35	12	7	17	10	7	16	6	3	1	1	12	2	8	6	2	9	9	0	5	18	8	9	10	31	18	26	24	20	11	4	32	6	28
ENSMUSG00000007783	6	9	0	0	10	5	3	6	3	3	5	4	10	0	9	0	0	12	15	0	0	6	25	0	12	1	20	1	2	19	0	0	1	7	4	2	2	0	9	2	2	0	0	6	4	8	0	3	0
ENSMUSG00000007805	0	10	0	1	9	4	3	0	0	0	0	0	0	0	0	0	3	0	0	0	0	0	0	0	0	0	0	4	2	19	0	1	3	0	5	1	0	0	0	6	5	0	1	0	1	2	0	0	0
ENSMUSG00000007812	3521	3415	3823	3551	3567	3209	3517	3777	3472	2791	3473	4776	3599	3252	3254	3275	4115	3695	3760	3397	2938	3782	2576	3478	2885	2970	2625	3335	3483	2959	2820	2718	2504	2549	2347	2152	2545	2783	2503	2391	3088	2448	2771	2251	3523	2660	2490	2377	1907
ENSMUSG00000007815	160	174	146	128	225	205	233	159	150	282	140	157	144	270	185	133	140	131	168	192	164	173	274	198	204	144	125	149	261	122	146	137	209	148	112	199	161	305	146	161	100	110	161	277	190	145	156	81	145
ENSMUSG00000007817	65	61	80	184	98	70	114	56	68	94	121	117	72	131	104	125	77	136	47	69	110	41	91	91	123	67	55	102	84	55	68	77	90	141	68	95	64	32	71	81	106	39	98	58	68	58	56	64	114
ENSMUSG00000007827	371	553	601	417	451	500	487	538	418	485	391	429	510	548	551	641	623	691	819	406	677	451	411	495	374	487	362	316	277	457	376	564	360	384	592	505	371	292	456	585	387	495	385	542	494	402	508	465	219
ENSMUSG00000007833	5	3	14	4	3	8	26	90	54	3	55	3	4	56	70	2	5	7	2	52	34	112	4	20	41	12	4	42	10	16	140	2	59	64	2	3	41	14	3	3	130	3	60	4	25	82	3	45	1
ENSMUSG00000007836	559	288	245	212	803	488	665	591	645	627	934	804	325	248	147	365	303	229	174	464	277	454	434	493	396	596	433	451	466	644	428	673	661	482	650	547	349	261	343	304	293	142	300	406	412	552	559	185	110
ENSMUSG00000007837	2	2	68	25	14	1	59	2	2	39	1	1	18	2	22	1	5	6	4	1	17	13	8	4	2	2	5	6	2	1	1	36	1	38	29	12	8	22	32	36	1	56	13	27	10	41	2	9	30
ENSMUSG00000007850	521	515	360	431	525	510	585	636	536	451	834	809	445	404	363	506	368	453	383	590	426	561	545	533	653	586	545	822	645	691	715	467	657	512	449	475	496	630	534	472	620	424	406	596	568	445	409	382	213
ENSMUSG00000007867	1692	1609	1296	1665	1738	1966	2254	1890	1765	1863	2468	2128	1751	1522	1411	1343	1708	1196	1537	2022	1765	1821	1528	2087	2483	1884	1911	2853	2394	2105	1947	2111	2501	1786	1898	2134	2774	2560	2637	2121	2190	1882	2000	2730	1545	2296	2075	1944	811
ENSMUSG00000007872	49	16	8	34	32	59	58	3	34	1	44	17	72	17	102	17	4	85	2	76	33	104	122	100	32	59	2	31	95	38	30	20	30	1	13	5	22	77	60	2	71	47	26	174	93	32	9	191	29
ENSMUSG00000007880	7468	7132	8312	8814	8783	8453	8516	8607	7726	8689	8988	8916	6376	6385	6075	5785	6598	7116	6400	7877	8313	8831	6717	8051	8354	9058	7875	10079	9741	8376	8498	8695	8777	9141	8174	8774	7815	7902	7626	9104	7620	7447	7205	8846	7335	7939	8348	7653	1872
ENSMUSG00000007888	0	6	11	12	11	7	9	1	9	8	4	6	18	12	2	10	15	3	18	11	12	10	13	6	6	5	12	21	13	10	0	11	17	6	2	9	12	8	9	5	7	10	6	6	12	7	14	17	2
ENSMUSG00000007891	341	124	335	212	358	342	515	347	544	257	266	177	332	342	283	171	252	307	186	235	362	324	375	466	653	340	535	786	780	340	749	468	342	375	309	493	519	533	732	498	548	392	305	1078	417	644	343	506	19
ENSMUSG00000007892	332	198	216	264	273	178	259	260	116	206	325	181	386	232	240	298	185	210	920	499	581	808	296	450	364	299	241	331	349	349	154	307	194	165	351	422	616	302	393	474	266	308	162	300	317	295	368	254	253
ENSMUSG00000007907	11	0	2	3	0	1	2	0	5	14	5	3	1	1	0	7	0	2	1	0	2	0	0	1	1	2	0	0	3	1	0	1	3	0	7	2	1	9	0	0	3	4	3	0	3	1	1	2	4
ENSMUSG00000007908	705	685	979	729	800	761	750	730	752	569	815	980	825	713	764	797	989	885	799	750	632	814	431	758	623	497	419	525	528	691	527	455	453	492	406	386	408	508	486	517	537	604	441	436	772	565	641	415	504
ENSMUSG00000007944	0	0	1	0	0	1	0	0	1	0	0	0	0	0	0	0	0	1	1	0	1	0	0	0	0	1	1	0	0	0	0	0	0	0	1	0	0	0	0	1	0	1	1	0	1	0	1	0	0
ENSMUSG00000007946	1	1	1	1	1	1	1	1	1	1	1	1	1	1	1	1	1	1	1	1	1	1	1	1	2	0	0	1	1	1	1	1	1	1	1	1	1	1	1	1	13	0	0	1	1	1	1	1	0
ENSMUSG00000007950	3	3	3	3	3	2	2	2	2	17	3	3	3	3	3	3	3	3	3	3	2	3	3	3	2	2	2	2	2	3	3	3	2	3	2	3	3	3	3	2	2	2	2	2	2	3	3	3	0
ENSMUSG00000007987	2	10	13	21	17	10	5	17	34	8	4	5	12	1	13	4	3	4	5	12	4	5	14	14	10	10	0	4	1	0	13	4	11	4	8	28	3	12	13	8	4	18	2	7	7	13	19	7	35
ENSMUSG00000007989	45	182	208	22	181	104	53	62	165	235	232	112	78	53	12	21	38	144	4	250	163	66	6	89	128	73	94	120	73	272	68	180	87	177	179	74	43	28	122	194	48	43	46	41	38	50	116	182	21
ENSMUSG00000008028	0	0	0	0	0	0	0	0	0	0	0	0	0	0	0	0	0	0	0	0	0	0	0	0	0	0	0	0	0	0	0	0	0	0	0	0	0	0	0	0	0	0	0	0	0	0	0	0	0
ENSMUSG00000008035	0	9	3	11	19	0	3	5	14	6	6	5	18	9	28	6	19	32	4	27	22	26	27	13	0	4	2	5	9	15	0	1	0	4	10	1	39	16	20	19	12	13	20	17	11	0	11	28	13
ENSMUSG00000008036	64	86	80	75	100	125	96	85	82	48	72	107	59	79	78	31	85	51	64	73	71	52	75	123	148	198	118	169	118	48	232	125	124	216	77	89	102	87	56	91	113	35	102	178	64	103	76	111	95
ENSMUSG00000008090	5	6	5	6	4	3	39	6	7	6	5	23	7	7	11	4	4	9	28	15	10	4	4	5	5	6	7	5	5	5	4	5	5	6	30	6	39	35	5	6	4	5	5	5	27	6	7	5	0
ENSMUSG00000008129	193	46	152	89	131	96	112	164	140	40	109	71	68	147	110	143	38	177	119	106	148	152	104	90	195	81	125	192	162	83	129	107	90	134	67	173	102	204	122	64	194	108	84	90	94	67	78	101	39
ENSMUSG00000008136	0	6	2	32	9	7	17	24	2	22	26	11	0	0	6	0	4	14	0	6	10	7	0	3	0	19	3	23	0	4	0	14	0	0	16	11	0	7	46	6	1	0	1	2	34	52	3	10	0
ENSMUSG00000008140	48	50	33	9	25	24	27	21	31	11	31	15	21	85	52	78	41	66	59	52	21	23	74	54	36	16	27	51	47	16	74	27	57	52	34	81	20	17	24	22	35	37	31	32	29	24	44	16	48
ENSMUSG00000008153	3	4	3	4	3	16	3	3	4	3	3	3	4	4	3	3	10	3	3	3	3	3	3	3	3	3	4	3	3	3	3	3	3	3	3	3	3	2	3	3	6	3	3	3	3	4	4	3	4
ENSMUSG00000008167	20	63	165	157	70	67	65	119	40	47	64	60	19	351	117	105	35	41	50	50	49	139	109	114	139	207	42	59	101	8	162	73	12	152	151	92	65	95	113	50	99	6	74	114	120	2	94	32	92
ENSMUSG00000008193	0	0	0	0	0	0	0	0	0	0	0	0	0	0	0	0	0	2	0	0	0	0	0	0	0	0	0	0	0	0	0	0	0	0	0	0	0	0	0	0	0	0	0	0	0	0	0	1	0
ENSMUSG00000008200	646	813	779	1054	1366	762	1086	1040	952	1170	1386	1493	1190	1044	1129	944	991	1348	980	1302	874	1002	952	1155	1207	893	1243	1255	1334	787	1030	758	1296	822	825	1186	1092	1389	897	851	1447	1084	1104	1391	1153	1191	1212	1220	605
ENSMUSG00000008206	0	0	0	0	0	0	0	6	0	1	0	0	0	7	0	0	0	5	0	0	0	0	0	0	0	3	0	5	1	0	10	3	0	0	11	0	0	0	9	8	0	0	0	5	0	0	0	8	5
ENSMUSG00000008226	10	7	22	20	17	23	13	12	21	22	16	13	36	23	16	23	19	20	17	23	34	20	20	20	10	11	13	21	12	26	16	19	14	15	20	8	10	17	13	18	26	41	37	26	33	10	26	18	1
ENSMUSG00000008301	544	559	289	487	606	391	225	418	448	526	659	500	541	264	294	439	382	421	283	452	435	437	253	321	306	358	393	437	490	330	399	371	574	334	632	446	346	278	486	337	345	253	378	606	301	312	549	272	92
ENSMUSG00000008305	8	57	38	94	9	14	42	18	25	28	25	20	15	55	25	54	44	63	37	25	44	84	34	40	25	35	46	44	30	50	22	13	26	22	54	90	46	28	48	29	31	42	32	44	29	45	85	62	151
ENSMUSG00000008307	0	0	0	0	0	0	0	0	0	0	0	0	0	0	0	0	0	0	0	0	0	0	0	0	0	0	0	0	0	0	0	0	0	0	0	0	0	0	0	0	0	0	0	0	0	0	0	0	0
ENSMUSG00000008318	2	2	6	2	1	0	35	20	1	1	4	1	3	40	1	1	5	41	17	6	3	1	1	9	25	1	1	1	1	12	1	7	41	5	1	1	1	5	1	16	25	0	1	35	3	1	1	8	0
ENSMUSG00000008333	1520	1120	725	1399	1668	1465	1872	1656	1513	1529	2189	2236	1139	765	668	768	1005	639	829	1467	1124	1231	1180	1434	2114	1690	1780	2521	2259	2306	1866	1906	1893	1930	1682	1874	1609	1672	1647	1433	1310	1015	1205	1817	1116	1381	1107	1242	287
ENSMUSG00000008348	83	108	129	216	121	75	83	61	94	141	106	59	216	207	228	314	265	303	413	252	225	155	159	189	104	171	96	125	188	122	133	71	140	66	86	88	150	154	139	158	127	79	200	148	186	86	84	121	168
ENSMUSG00000008373	105	92	38	32	82	33	77	72	67	74	60	38	35	44	23	30	41	37	22	44	45	25	78	67	73	31	59	21	88	88	63	83	74	22	72	80	64	35	28	68	27	27	45	54	43	57	27	30	20
ENSMUSG00000008384	28	895	256	322	153	103	359	151	37	265	43	317	323	21	256	33	70	64	43	24	784	29	26	162	358	176	122	163	128	20	305	105	224	117	130	16	217	485	576	149	44	137	12	100	50	12	82	27	935
ENSMUSG00000008393	3630	2433	2331	3664	3605	2665	3409	3011	3606	3169	3613	2703	3104	2289	3162	3644	3090	3261	2656	3995	3130	3424	4018	3182	4432	3287	3723	4599	5146	3484	4303	3017	3585	2676	2672	2791	3315	3682	2812	2593	3305	2756	2440	3864	3678	3469	2250	3292	543
ENSMUSG00000008398	9	3	3	0	0	4	4	5	2	3	0	2	21	12	23	8	33	17	5	4	5	11	7	4	0	0	3	2	0	4	5	1	4	0	2	9	3	19	0	9	1	6	4	24	4	6	4	1	21
ENSMUSG00000008429	3985	5934	5098	4851	4941	5074	5780	6192	5354	5413	4663	5379	3808	4064	5102	4265	4602	5718	4279	4903	4517	4852	4029	4848	4913	4376	4663	4822	5399	4361	4257	4281	5218	5017	3936	4741	3893	3552	3614	3935	3956	4147	4159	3588	5025	5017	4625	3904	1054
ENSMUSG00000008435	25	54	12	7	75	51	13	7	30	24	35	11	13	27	6	0	9	15	1	24	15	19	2	4	34	69	53	92	21	31	35	41	76	20	17	56	17	21	44	41	17	3	54	32	10	14	2	30	12
ENSMUSG00000008438	0	0	0	3	0	0	1	0	0	0	0	0	0	0	0	7	0	0	0	0	0	0	0	0	0	0	0	0	0	0	0	0	0	0	0	0	0	0	0	0	1	0	0	0	0	0	0	1	0
ENSMUSG00000008450	5	31	16	22	29	2	24	15	33	24	11	11	27	8	12	26	43	41	12	22	26	14	8	36	54	14	16	15	33	24	30	18	10	43	18	30	43	26	24	17	29	29	32	54	11	21	16	54	7
ENSMUSG00000008461	1	0	0	1	0	0	0	0	0	0	0	0	1	1	0	0	0	2	0	0	11	0	0	0	0	0	0	0	0	1	0	0	0	0	0	0	0	0	0	0	0	0	0	0	0	0	0	0	0
ENSMUSG00000008475	75	3	25	8	11	37	18	30	21	24	34	21	58	102	38	26	42	43	61	30	45	19	48	32	19	20	5	7	18	28	12	28	43	18	29	11	19	10	23	26	9	27	26	13	12	11	75	30	50
ENSMUSG00000008482	1	1	1	1	1	1	1	1	1	1	1	1	1	1	1	1	1	1	1	1	1	1	1	1	1	1	1	1	1	1	1	1	1	1	1	1	1	1	1	1	1	4	1	1	1	1	2	1	0
ENSMUSG00000008489	2019	2147	2747	1906	2008	1818	2249	2424	3109	2900	2478	2167	1753	2083	2155	2094	2795	2015	3825	2458	2239	2456	2433	2971	1939	3328	2726	1697	2208	3035	1853	3088	2840	3279	3879	3283	1722	1440	1947	2341	1344	1761	2100	1823	1867	2589	3804	2831	1278
ENSMUSG00000008496	770	940	1464	858	1145	1278	1306	1473	1215	1160	991	946	788	981	907	988	900	853	578	929	840	961	733	1146	895	1162	948	1305	1238	1196	744	1257	1705	1229	1259	1563	1113	1304	1087	1634	965	733	914	1573	773	1298	1281	905	266
ENSMUSG00000008540	0	12	2	0	2	0	7	0	5	0	0	0	0	0	2	6	5	3	1	4	0	4	8	1	7	0	11	0	4	9	4	4	4	1	0	1	0	0	17	5	2	0	0	1	0	7	7	0	11
ENSMUSG00000008575	6	6	5	0	9	5	6	0	0	7	12	9	8	0	0	1	4	1	1	2	1	7	3	6	1	2	4	15	2	15	4	2	6	5	7	8	5	0	2	6	3	4	0	5	22	9	0	1	1
ENSMUSG00000008590	0	0	0	0	0	0	0	0	0	0	0	0	0	0	0	0	0	0	0	0	0	0	0	0	0	0	0	0	0	0	0	0	0	0	0	0	0	0	0	0	0	0	0	0	0	0	0	0	0
ENSMUSG00000008601	6	4	9	114	13	4	45	2	23	81	44	8	6	201	13	22	12	30	65	6	112	8	7	4	12	38	42	3	85	7	23	89	21	3	3	281	5	61	4	33	43	20	4	27	17	78	6	8	12
ENSMUSG00000008604	73	120	98	58	122	94	84	40	147	110	64	53	95	112	93	108	117	115	82	139	87	225	132	209	134	159	82	151	181	73	194	110	110	111	162	193	177	162	99	105	90	108	109	176	114	202	108	129	121
ENSMUSG00000008658	235	126	96	110	188	178	209	231	251	277	159	205	150	107	249	90	244	171	214	134	173	218	61	199	132	112	190	209	119	196	118	169	333	344	274	281	183	181	210	285	237	112	279	170	197	350	183	156	38
ENSMUSG00000008668	17	21	33	31	24	3	7	37	30	40	21	29	11	12	43	24	17	38	38	33	15	16	28	20	14	8	27	20	7	54	5	6	25	24	14	7	12	21	6	38	40	24	12	24	38	28	38	18	41
ENSMUSG00000008682	132	119	67	44	131	218	200	100	122	136	123	104	106	77	65	105	118	80	73	162	96	149	133	154	260	33	340	172	224	184	184	166	186	31	54	138	190	155	404	108	145	109	143	129	216	204	90	252	33
ENSMUSG00000008683	138	91	66	201	240	175	161	161	178	220	246	171	103	107	75	76	117	46	79	218	178	143	179	246	248	279	211	321	298	337	292	297	302	224	272	271	265	275	225	232	217	186	231	313	190	297	166	225	42
ENSMUSG00000008690	251	143	316	144	349	122	171	270	185	196	158	129	126	234	217	444	372	80	95	319	162	212	258	224	277	253	357	347	378	71	347	302	134	117	172	291	586	477	327	217	264	274	236	306	339	257	171	242	241
ENSMUSG00000008730	1654	388	490	929	228	172	396	114	342	323	45	142	44	49	188	324	154	371	292	683	214	51	332	350	153	402	382	217	1362	892	304	272	449	371	619	492	230	13	556	44	154	293	168	451	22	509	147	606	2333
ENSMUSG00000008734	0	0	0	0	0	0	0	0	0	0	0	0	0	0	0	0	0	0	0	0	0	0	0	0	0	0	1	0	0	1	0	1	0	0	0	0	0	2	0	0	0	0	0	3	0	0	0	1	0
ENSMUSG00000008763	45	130	89	133	54	118	90	117	82	72	117	121	76	128	85	156	184	116	147	99	71	97	34	127	65	55	54	75	42	75	61	63	42	66	113	66	59	74	44	17	35	74	87	44	50	66	94	61	176
ENSMUSG00000008789	97	64	117	60	63	82	67	119	124	94	85	112	42	76	98	57	134	68	35	37	62	13	57	88	60	62	47	31	67	105	68	73	34	11	56	76	42	32	54	7	48	58	58	11	22	95	114	67	60
ENSMUSG00000008822	1	3	0	8	0	4	8	7	5	0	8	0	12	2	1	3	12	7	3	12	6	10	15	1	0	5	0	4	4	1	24	4	11	26	1	3	0	0	0	15	2	1	0	7	0	1	3	2	20
ENSMUSG00000008843	0	0	0	0	0	0	0	0	0	0	0	0	0	0	0	0	0	0	0	0	0	0	0	0	0	0	0	0	0	0	0	0	0	0	0	0	0	0	0	0	0	0	0	0	0	0	0	1	0
ENSMUSG00000008845	1	2	31	6	4	4	6	3	1	2	2	7	2	2	1	0	1	0	8	0	0	8	0	0	1	8	1	5	22	0	0	0	0	1	0	0	0	8	0	0	0	0	0	0	10	1	1	1	0
ENSMUSG00000008855	3	18	4	3	3	3	3	3	13	3	3	12	3	4	4	3	3	25	4	3	3	3	3	3	2	2	2	2	2	3	3	3	3	3	3	3	3	3	3	3	2	2	3	2	2	3	3	3	63
ENSMUSG00000008859	1087	715	693	999	872	719	782	863	806	930	973	956	480	602	403	434	712	366	892	758	556	848	566	678	1084	1095	936	899	819	1147	832	947	1046	903	1047	852	430	524	656	628	608	595	641	605	683	531	713	527	399
ENSMUSG00000008874	0	1	7	0	2	0	0	6	5	5	2	0	0	0	1	0	0	0	0	0	0	0	1	0	0	0	0	0	0	0	0	0	0	0	0	0	0	1	0	0	0	1	0	0	0	1	1	0	1
ENSMUSG00000008892	164	85	139	115	77	102	80	97	93	75	66	104	135	67	83	73	62	74	76	79	72	74	98	95	148	77	77	98	87	145	138	92	58	125	111	130	141	69	88	83	167	141	101	123	105	77	85	91	143
ENSMUSG00000008932	0	0	0	0	0	0	0	0	2	0	0	0	0	0	0	0	0	0	0	0	0	0	0	0	0	0	0	0	0	0	0	0	0	0	0	0	0	0	0	0	0	0	0	0	0	0	0	0	0
ENSMUSG00000008958	393	406	298	438	523	378	564	426	372	422	438	421	324	204	272	273	332	294	122	371	257	220	270	433	628	420	446	683	720	377	628	388	505	492	291	421	301	506	283	270	431	265	340	590	295	303	232	337	120
ENSMUSG00000008976	1	11	7	65	4	9	4	42	4	4	37	59	47	22	5	11	120	14	11	125	11	41	106	5	3	5	55	3	2	3	3	5	4	68	6	4	20	56	4	27	45	12	92	48	6	28	24	61	2085
ENSMUSG00000008999	88	3	129	3	133	21	50	0	76	46	34	7	156	88	117	57	77	82	45	31	117	179	115	74	88	24	15	79	23	70	3	16	41	32	10	87	26	22	105	26	76	40	67	16	71	118	90	96	81
ENSMUSG00000009013	389	215	184	294	340	352	277	219	287	499	183	185	458	457	449	554	447	377	598	435	392	544	495	386	525	327	373	341	299	549	291	325	234	471	200	206	571	449	545	538	573	653	456	639	476	387	501	357	829
ENSMUSG00000009030	189	123	266	117	330	199	215	164	232	210	249	426	270	274	258	252	157	251	250	293	238	324	227	294	86	104	62	126	109	172	66	148	153	200	160	202	266	122	157	136	129	157	233	126	171	298	242	174	151
ENSMUSG00000009035	98	224	118	81	187	118	200	107	103	192	147	262	136	176	293	156	248	219	95	167	196	122	106	131	105	108	130	153	133	62	188	67	143	127	59	78	60	78	106	90	116	121	79	99	57	82	150	158	153
ENSMUSG00000009047	0	0	0	0	0	0	0	0	0	7	0	0	0	0	1	0	0	0	0	0	6	0	0	0	0	0	0	0	0	0	0	0	0	0	0	0	0	0	0	0	2	0	0	0	0	0	0	3	0
ENSMUSG00000009070	1	0	0	1	0	9	0	0	3	0	0	0	1	1	0	0	0	0	0	0	0	0	0	0	0	0	0	0	0	0	0	0	0	0	0	0	0	0	0	0	0	0	0	0	0	0	0	1	0
ENSMUSG00000009073	1498	1386	940	1714	2123	1309	2176	1691	1627	1909	1940	1796	1369	1152	1481	1153	1389	1372	830	1731	1515	1121	1375	1751	2449	1570	1609	2625	2557	1505	2295	1353	1973	1797	1291	1443	1463	2252	1272	1163	2192	1322	1380	2235	1496	1557	1209	1441	375
ENSMUSG00000009075	1	0	0	1	0	0	0	0	0	0	0	0	0	0	0	0	0	1	1	0	0	0	0	0	0	0	0	0	0	0	0	0	0	0	0	0	0	0	0	0	0	0	0	0	0	0	0	0	0
ENSMUSG00000009076	20	14	12	19	16	10	40	12	11	89	16	18	18	21	19	16	15	26	15	15	36	57	19	45	88	9	10	16	13	17	17	12	54	12	93	68	17	20	14	12	48	41	10	26	11	13	114	76	50
ENSMUSG00000009079	144	126	115	139	129	109	128	121	82	124	167	177	132	103	57	97	89	81	71	128	104	124	148	107	127	101	84	185	180	73	121	94	121	86	89	97	126	163	91	87	119	80	103	121	103	107	78	112	130
ENSMUSG00000009090	960	880	657	1081	685	779	941	974	981	833	514	748	739	668	843	692	863	897	720	771	706	637	1030	1082	1262	865	806	1163	1310	711	1077	691	638	725	558	780	1177	1475	964	1032	1215	698	605	884	1113	756	692	857	342
ENSMUSG00000009092	82	79	54	88	58	102	71	27	23	9	4	22	116	266	201	281	183	219	311	175	103	251	195	323	44	67	26	6	4	45	33	41	99	64	42	65	135	102	103	104	154	99	132	125	164	49	109	27	311
ENSMUSG00000009093	2	1	11	2	0	2	0	10	0	0	0	0	2	2	1	5	9	16	11	0	2	0	0	0	0	0	0	0	0	1	0	0	0	0	5	0	9	0	17	0	0	11	12	0	0	0	0	0	14
ENSMUSG00000009097	0	0	0	0	0	0	0	0	0	0	0	0	0	0	0	0	0	2	0	0	0	0	0	0	0	0	0	0	0	0	0	0	0	0	0	0	0	0	0	0	0	0	0	0	0	0	0	0	0
ENSMUSG00000009108	4	3	9	0	1	0	1	3	0	0	6	8	3	0	5	0	0	0	0	1	0	8	0	0	4	0	0	0	0	0	0	0	3	4	8	0	0	0	0	1	0	0	0	2	0	0	0	0	193
ENSMUSG00000009112	1841	1720	1512	1589	1405	1551	1404	1856	1847	1675	1436	2234	1167	1662	1482	1550	1793	1899	1604	1440	1621	1554	1767	1845	1513	1352	1221	1286	1340	1177	1422	1375	1397	1408	1043	1382	1554	1723	1639	1621	1437	1435	1341	1273	1658	1801	1599	1260	1021
ENSMUSG00000009114	6	6	6	7	5	4	5	5	5	5	6	6	7	8	7	6	6	5	5	5	4	5	5	5	4	4	4	5	4	6	5	5	5	5	5	5	5	5	5	5	3	3	4	4	4	5	5	5	12
ENSMUSG00000009115	0	0	0	0	0	0	0	0	0	0	0	0	0	0	0	0	0	0	0	0	0	0	0	0	0	0	0	1	0	0	0	0	0	0	0	0	0	0	0	0	0	0	0	0	0	0	0	0	0
ENSMUSG00000009145	1	1	0	1	1	5	1	1	1	1	1	1	1	1	0	0	0	3	0	0	0	0	0	1	1	1	1	1	1	1	1	0	0	1	0	6	1	1	1	0	0	0	0	1	1	1	1	0	0
ENSMUSG00000009185	0	0	0	0	0	0	0	0	0	0	0	0	0	0	0	0	0	0	0	0	0	0	0	0	0	0	0	0	0	0	0	0	0	0	0	0	0	0	0	0	7	0	0	0	0	5	0	0	0
ENSMUSG00000009207	53	63	30	92	32	12	42	47	50	37	34	17	44	106	54	52	99	247	79	59	65	46	70	82	33	36	7	25	25	36	11	5	21	24	9	9	55	44	41	33	60	34	27	30	56	56	44	75	237
ENSMUSG00000009210	0	0	0	0	0	0	0	0	0	0	0	0	0	0	0	0	0	0	0	0	0	0	0	0	0	0	0	0	0	0	0	0	0	0	0	0	0	0	0	0	0	0	0	0	0	0	0	0	0
ENSMUSG00000009216	0	0	0	0	0	0	0	0	0	0	0	0	0	0	0	0	0	0	0	0	0	0	0	0	0	0	0	0	0	0	0	0	0	0	0	0	0	0	0	0	0	0	0	0	0	0	0	0	1
ENSMUSG00000009246	0	0	0	0	0	0	0	0	0	0	0	0	0	0	0	0	0	2	0	0	0	0	0	0	0	0	0	0	0	0	0	0	0	0	0	0	0	0	0	0	0	0	0	0	0	0	0	1	0
ENSMUSG00000009248	0	1	14	1	0	7	8	1	1	1	10	1	1	1	1	16	13	5	1	11	2	0	0	2	0	1	1	3	7	1	2	1	4	10	1	1	9	0	4	1	1	0	0	4	11	1	48	1	0
ENSMUSG00000009281	0	0	0	0	0	0	0	0	0	0	0	0	0	0	0	0	0	0	0	0	0	0	0	0	0	0	0	0	0	0	0	0	0	0	0	0	0	0	0	0	0	0	0	0	0	0	0	0	0
ENSMUSG00000009291	5018	5282	5764	6358	6816	5524	5540	6218	6429	5882	8084	5715	4878	3945	4055	5045	5425	5400	3532	5789	3388	3887	3746	3958	3884	2842	3016	6304	5060	4708	4848	4139	5270	4138	3784	3708	2664	4066	3638	4289	4010	3341	3822	5077	3932	3608	2485	2229	1215
ENSMUSG00000009292	0	0	0	0	0	0	0	0	0	0	0	0	0	0	0	0	0	0	0	3	0	0	0	0	0	0	0	0	0	0	0	0	0	0	0	0	0	1	0	0	0	0	0	0	0	0	0	0	0
ENSMUSG00000009293	1259	1379	1245	1254	1691	1524	1525	1537	1426	1434	1304	1370	1212	1084	1087	1211	977	1159	789	1819	1095	1376	1278	1477	1367	1504	1347	1594	1866	1009	1451	1361	1982	1621	1020	1257	1709	1825	1766	1631	824	1037	1616	2489	1181	2020	1251	1387	188
ENSMUSG00000009350	0	0	0	0	0	1	0	0	0	0	1	0	0	0	0	0	2	0	0	0	0	0	0	0	0	0	0	0	0	0	0	0	0	0	0	0	0	0	0	0	7	0	0	0	0	0	0	0	0
ENSMUSG00000009356	0	0	0	0	0	0	0	0	0	0	0	0	0	0	0	0	1	0	0	0	0	0	0	0	0	0	0	0	0	0	0	0	0	0	0	0	0	0	0	0	0	0	0	0	0	0	0	0	0
ENSMUSG00000009376	0	0	0	0	0	0	0	0	0	0	0	0	0	0	0	0	2	1	0	0	0	0	0	0	0	0	0	0	0	0	0	0	0	0	0	0	0	0	0	0	0	0	0	0	0	0	0	0	0
ENSMUSG00000009378	4	10	20	11	3	8	17	19	7	8	6	8	11	11	11	19	21	20	14	14	17	21	6	18	4	2	5	0	5	1	4	3	3	11	3	5	9	7	6	12	3	10	7	6	16	7	16	12	9
ENSMUSG00000009394	0	1	1	1	0	0	1	1	1	1	0	0	1	1	0	0	3	0	0	0	0	20	0	0	12	1	1	0	0	0	0	15	0	1	1	1	0	13	0	34	0	1	1	0	1	1	1	0	0
ENSMUSG00000009406	107	203	92	235	72	84	158	22	86	97	99	58	118	192	129	62	118	89	115	139	129	171	191	74	181	54	53	95	170	52	71	100	95	77	39	66	118	133	45	82	108	158	235	152	106	43	58	193	36
ENSMUSG00000009418	269	203	170	231	175	120	162	169	198	170	195	196	240	159	73	67	187	135	62	137	125	318	42	113	104	96	137	62	210	140	131	131	236	181	159	79	57	102	58	159	45	122	94	123	58	135	166	53	57
ENSMUSG00000009470	989	1044	1261	972	875	976	1019	1061	756	993	1061	1371	935	1079	1199	1184	1500	1533	1023	809	824	953	808	842	637	583	604	664	698	727	616	564	535	600	466	512	460	580	510	590	839	815	746	609	965	617	679	504	484
ENSMUSG00000009471	0	0	0	0	0	0	0	0	0	0	0	0	0	0	0	0	0	0	0	0	0	0	0	0	0	0	0	0	0	0	0	0	0	0	0	0	0	0	0	0	0	0	0	0	0	0	0	0	0
ENSMUSG00000009487	0	0	0	0	0	0	0	0	0	0	0	0	0	0	0	8	0	3	0	1	0	0	0	0	0	0	0	0	0	0	0	0	0	0	0	0	0	0	0	0	0	0	0	0	0	0	0	4	0
ENSMUSG00000009535	1263	1090	1129	1484	1274	983	1329	1290	1259	1208	1431	1362	981	986	1302	1290	1258	1249	1064	1515	979	1211	1360	1432	1281	1039	1101	1309	1405	1227	1059	1044	1228	944	892	1086	1197	1198	881	1118	1250	983	1207	1360	1055	1256	903	1022	243
ENSMUSG00000009545	688	601	648	832	1056	707	1018	1115	785	1009	903	1018	864	880	1045	816	701	1310	919	871	1117	969	942	1075	994	929	860	1295	1028	842	684	891	1001	962	828	700	1199	1123	1204	969	1132	1507	1399	1588	1119	1305	899	884	61
ENSMUSG00000009549	813	926	666	1012	957	963	1032	800	798	904	1332	1098	719	573	531	766	739	643	666	829	761	610	501	837	1051	984	956	1368	1096	1107	1116	1012	1266	1052	1109	1078	840	908	931	901	689	690	736	977	633	849	593	729	687
ENSMUSG00000009551	0	0	0	0	0	0	0	0	0	0	0	0	0	0	0	0	0	0	0	0	0	0	0	0	0	0	0	3	0	0	0	0	0	0	0	0	0	0	0	0	0	0	0	0	0	0	0	0	0
ENSMUSG00000009555	234	335	296	435	344	238	370	318	196	247	266	335	214	235	231	309	199	311	173	279	271	232	343	325	330	359	255	290	382	271	306	189	324	221	217	253	552	313	313	258	303	312	333	423	328	362	226	360	510
ENSMUSG00000009563	2311	3667	1834	2467	3226	2058	2150	2399	2279	2290	3171	4674	2818	2450	2218	2285	1969	2227	1782	3186	2541	1498	2014	2176	1721	1295	2396	3241	2664	3140	2291	2881	4233	2628	1989	2278	2160	2067	1569	2604	1685	2273	2989	2223	1623	1547	1368	815	271
ENSMUSG00000009566	5999	6127	3931	6100	4760	4880	5598	4699	4506	4808	6013	6980	4872	4246	4151	4546	4186	4148	4107	4371	4049	5025	4237	4467	5595	4209	4599	6618	6328	4409	5444	3295	4203	3676	2947	3906	4856	5751	4446	4460	6011	4178	4247	4853	4521	4020	3088	3146	710
ENSMUSG00000009569	287	408	258	329	271	358	274	209	268	252	167	262	200	256	309	167	268	339	275	312	296	259	298	349	333	276	201	269	274	394	192	305	270	329	196	268	347	340	244	311	410	286	337	301	241	383	290	212	197
ENSMUSG00000009575	52	70	65	67	107	81	80	74	125	66	178	108	59	177	268	140	118	108	73	79	76	169	99	129	87	101	72	115	59	78	83	129	133	101	97	146	51	148	50	123	102	139	105	104	80	142	149	90	380
ENSMUSG00000009585	2	1	0	2	1	10	1	1	1	1	5	1	2	2	1	13	27	4	0	2	2	0	2	1	6	2	6	1	1	1	1	1	1	1	9	8	1	1	4	0	3	0	0	6	0	3	1	1	0
ENSMUSG00000009588	0	0	0	0	0	0	0	0	0	0	0	0	0	0	0	0	1	1	1	0	0	0	0	0	0	0	0	0	10	0	0	0	0	0	0	0	1	0	0	0	0	0	0	0	0	0	0	0	0
ENSMUSG00000009596	0	0	0	0	0	0	0	0	0	0	0	0	0	0	0	0	0	0	0	0	0	0	0	0	0	0	0	0	0	0	0	0	0	0	0	0	0	0	0	0	0	2	0	0	0	0	0	0	0
ENSMUSG00000009614	1	1	1	1	2	2	2	1	1	1	1	1	1	1	1	1	1	4	2	2	2	2	2	2	2	2	2	2	2	1	2	1	1	1	1	1	2	2	1	2	2	2	2	2	2	1	1	1	2
ENSMUSG00000009621	69	50	105	125	88	85	99	73	42	95	57	114	185	172	88	75	78	141	63	128	112	123	89	67	29	20	56	40	13	26	82	80	88	109	40	54	41	39	67	82	72	60	68	86	46	22	77	60	26
ENSMUSG00000009628	7	15	27	14	14	0	25	35	34	7	13	2	8	0	0	0	7	0	8	21	0	15	75	11	2	11	21	11	55	55	1	35	43	55	9	40	11	9	0	2	1	51	4	0	7	27	23	36	19
ENSMUSG00000009630	3	11	9	4	16	10	7	7	7	8	23	15	72	39	77	99	50	97	41	31	13	10	9	9	7	9	39	6	6	6	46	17	24	8	27	8	53	7	7	10	12	32	54	29	33	25	61	38	288
ENSMUSG00000009633	2	0	0	0	0	0	0	0	0	0	0	0	0	4	0	0	2	0	0	0	0	0	0	0	0	0	0	0	0	0	0	0	0	0	1	0	0	0	0	1	0	0	0	0	0	0	0	0	0
ENSMUSG00000009640	134	14	47	48	65	6	16	3	11	1	18	10	16	4	17	42	1	15	43	46	6	0	4	38	0	0	28	4	27	2	85	15	1	1	1	14	45	18	5	8	28	48	27	44	30	28	1	1	28
ENSMUSG00000009646	47	157	24	84	82	22	65	141	77	43	77	97	91	10	27	30	12	39	23	25	28	23	12	16	49	70	74	31	50	192	51	94	90	16	101	24	46	83	10	31	42	75	20	87	79	7	12	60	0
ENSMUSG00000009647	336	562	341	493	642	603	743	588	569	569	511	437	296	351	274	280	378	305	219	526	406	329	393	465	618	627	469	637	702	446	616	646	709	597	518	558	481	630	478	457	458	300	472	651	477	481	468	429	170
ENSMUSG00000009654	0	0	0	0	0	0	0	2	1	0	0	2	0	4	0	0	0	1	0	2	0	0	1	0	0	0	0	5	0	0	0	0	1	0	0	0	0	0	3	0	2	0	0	0	1	0	1	0	0
ENSMUSG00000009670	279	171	229	273	289	344	324	292	404	399	414	450	310	271	179	150	408	150	327	312	233	455	318	402	333	349	408	330	327	220	133	300	317	324	217	317	297	354	152	204	278	165	223	261	228	337	384	253	281
ENSMUSG00000009681	63	148	180	62	115	94	137	116	153	158	164	138	74	159	94	178	109	175	56	51	151	47	103	118	116	190	206	137	183	195	149	104	192	115	222	163	121	159	173	34	152	119	96	149	157	105	154	214	262
ENSMUSG00000009687	0	0	0	0	0	0	0	0	0	0	0	0	0	0	0	0	0	0	0	0	0	0	0	0	0	0	0	0	0	0	0	0	0	0	0	0	0	0	0	0	0	0	0	0	0	0	0	0	0
ENSMUSG00000009731	1	1	0	1	0	15	1	1	1	0	0	0	1	1	0	0	0	0	0	0	0	0	0	0	1	1	1	1	1	1	1	0	0	0	0	0	0	0	0	0	0	0	0	0	0	1	0	0	0
ENSMUSG00000009733	215	134	205	299	300	168	189	190	164	237	211	321	207	211	117	203	60	125	199	201	186	228	166	84	138	157	147	137	183	143	155	173	203	212	194	138	131	186	141	141	161	170	238	187	137	251	159	215	138
ENSMUSG00000009734	18	9	5	4	16	5	19	8	23	24	21	10	21	12	56	22	16	46	30	17	8	16	8	6	17	15	13	15	7	12	9	18	7	20	22	29	12	14	18	14	31	30	24	11	14	18	20	15	0
ENSMUSG00000009739	86	45	36	18	7	69	39	10	11	18	46	9	20	21	8	6	65	95	3	5	4	12	6	78	87	85	9	29	21	21	298	7	98	27	138	73	8	46	26	7	99	4	38	35	88	10	9	6	73
ENSMUSG00000009741	1686	2371	2250	2175	2539	2298	1634	2177	2117	2040	1611	1611	1709	2181	2599	2410	1519	2521	1409	2162	2205	2171	2176	2351	2473	1760	2154	2598	2389	2016	2859	2022	2253	3042	2056	2938	2600	2287	2492	2621	2134	2172	2568	2904	2076	3149	2055	2074	650
ENSMUSG00000009772	0	0	0	0	0	1	0	0	0	0	0	0	0	0	0	0	0	0	0	0	0	0	0	0	0	0	0	0	0	0	0	0	0	0	0	0	0	0	0	0	0	0	0	0	0	0	0	1	0
ENSMUSG00000009828	146	109	115	111	66	83	52	72	52	98	85	67	64	71	115	121	89	58	111	67	68	53	52	50	71	62	93	108	57	81	20	79	71	99	82	62	69	50	48	56	40	64	72	83	59	62	72	62	231
ENSMUSG00000009863	10	365	256	49	77	248	412	258	191	317	309	264	365	150	94	32	88	417	159	132	25	385	36	236	245	400	156	600	309	382	310	47	340	365	173	169	331	316	325	248	395	153	200	163	96	80	193	147	0
ENSMUSG00000009876	2	2	1	2	1	1	6	1	1	6	1	1	2	2	8	1	1	1	16	1	5	1	1	1	1	1	1	1	1	2	1	1	1	1	1	1	1	1	1	3	1	1	1	1	3	14	1	1	4
ENSMUSG00000009894	244	161	89	273	151	279	224	86	67	169	157	248	197	134	201	99	161	152	182	199	111	164	154	171	235	184	235	194	244	291	341	184	144	177	173	181	178	193	111	268	347	221	183	63	245	130	165	135	192
ENSMUSG00000009900	0	0	0	0	0	0	0	0	0	0	0	0	0	0	0	0	0	0	0	0	0	0	0	0	0	0	0	0	0	0	0	0	0	0	0	0	0	0	0	0	0	0	0	0	0	0	0	0	0
ENSMUSG00000009905	49	62	77	69	70	76	40	69	108	61	80	61	51	83	54	63	79	57	60	66	55	33	56	81	39	53	41	11	39	47	46	54	64	101	69	60	21	43	65	57	57	33	88	61	52	55	110	59	30
ENSMUSG00000009907	103	168	142	139	64	118	99	101	90	97	100	120	95	138	109	124	89	132	163	123	102	138	145	91	135	81	121	125	61	116	94	74	70	80	88	63	116	87	105	116	128	144	123	68	153	123	155	147	168
ENSMUSG00000009927	4	4	3	4	4	3	4	4	4	4	4	4	4	4	4	4	3	3	9	8	4	4	4	4	4	4	4	4	4	4	4	4	3	4	3	4	4	4	4	4	4	4	9	9	4	4	14	13	11
ENSMUSG00000009941	5	4	3	5	4	3	4	4	4	4	77	5	5	5	5	4	4	3	4	38	3	4	5	4	4	3	3	4	4	4	4	4	4	4	3	4	4	5	4	3	3	3	3	4	17	4	4	4	7
ENSMUSG00000009995	459	532	431	531	567	567	593	692	712	483	545	634	396	283	343	388	329	349	242	439	455	371	448	466	815	616	664	782	851	476	629	621	756	747	493	485	509	565	486	595	561	568	585	871	562	627	482	479	82
ENSMUSG00000010021	0	1	4	0	0	2	0	1	1	3	0	0	1	1	4	0	4	0	0	0	0	1	0	2	0	8	1	0	0	0	0	0	0	0	0	0	0	5	0	0	0	0	0	0	0	1	1	1	0
ENSMUSG00000010025	197	308	248	47	55	92	155	141	124	131	96	120	117	189	100	145	81	211	330	104	100	122	127	47	296	199	149	96	158	286	163	47	27	37	159	69	85	135	4	121	65	74	57	27	107	45	43	225	96
ENSMUSG00000010044	72	233	205	34	143	36	123	203	55	76	77	75	275	416	501	321	255	279	254	223	148	47	142	209	160	114	102	138	214	19	278	147	99	113	200	118	108	129	138	109	57	97	130	182	157	375	46	175	22
ENSMUSG00000010045	37	7	10	8	7	20	6	79	135	7	8	9	8	11	11	9	9	9	50	7	7	8	7	46	20	5	5	5	5	34	6	7	7	7	7	7	141	6	7	7	4	5	6	5	5	7	7	18	19
ENSMUSG00000010047	83	65	30	76	24	14	0	24	55	38	4	20	7	13	4	50	20	10	24	12	18	10	20	21	72	1	64	30	3	3	35	26	9	8	29	60	14	4	47	8	21	86	9	8	66	4	21	10	17
ENSMUSG00000010048	78	170	32	53	49	66	60	93	16	26	106	65	176	5	60	48	23	90	57	18	14	87	15	24	17	58	27	12	35	9	16	82	55	178	41	65	108	39	14	103	55	4	19	40	95	22	11	24	9
ENSMUSG00000010051	0	0	0	0	8	0	0	0	2	1	1	0	0	0	0	5	1	2	0	1	1	0	2	3	2	0	1	0	2	0	0	7	0	13	0	4	4	1	0	1	0	0	2	0	1	9	0	4	0
ENSMUSG00000010054	1	0	0	2	1	1	4	0	0	0	0	0	2	0	0	4	0	1	1	0	0	0	0	0	3	4	1	9	0	3	0	0	0	0	5	3	0	1	0	0	5	0	0	0	0	0	0	0	3
ENSMUSG00000010057	513	473	377	621	534	562	587	619	559	429	385	469	465	355	467	510	473	418	358	408	537	324	366	445	696	543	686	719	877	591	700	556	590	492	660	591	938	815	652	693	499	558	504	730	566	630	425	727	118
ENSMUSG00000010064	2	4	3	3	2	7	2	3	3	3	2	2	4	4	3	2	6	9	2	2	2	2	1	2	2	3	3	2	2	2	2	3	2	3	3	3	2	1	2	3	1	2	2	2	2	3	4	2	6
ENSMUSG00000010066	0	0	0	0	0	0	0	0	0	0	0	0	0	0	0	0	0	0	0	0	0	0	0	0	0	0	0	0	0	0	0	0	0	0	0	0	0	0	0	0	0	0	0	0	0	0	0	0	0
ENSMUSG00000010067	77	71	33	70	59	83	62	84	74	43	56	84	45	26	26	31	28	37	42	56	36	38	54	31	120	59	108	112	104	39	103	20	77	60	24	67	72	55	62	49	85	54	31	51	53	72	30	15	0
ENSMUSG00000010080	0	0	0	0	0	0	0	0	0	0	0	0	0	0	0	0	1	0	0	0	0	0	0	0	0	0	0	0	0	0	0	0	0	0	0	0	0	0	0	0	0	0	0	0	0	0	0	0	0
ENSMUSG00000010095	2783	3282	1980	2869	2827	2519	3024	3574	3116	2933	3053	3798	1940	1227	1529	1544	2107	1754	1272	1936	2110	1517	1966	1950	3579	3220	3282	4330	3737	2944	3722	3288	4027	3846	2722	2859	2039	2264	1887	1660	2301	1743	2236	3337	2151	2093	1625	1995	437
ENSMUSG00000010097	2	35	92	145	127	62	148	15	20	111	113	100	114	221	61	77	64	39	17	47	69	34	117	84	144	132	49	107	84	42	134	91	108	110	101	65	55	128	102	134	102	110	120	58	80	61	41	44	416
ENSMUSG00000010110	268	401	142	278	257	290	149	232	103	149	85	256	92	295	617	346	233	250	56	158	159	229	126	181	289	232	149	236	307	214	241	188	289	138	145	191	161	335	262	160	592	763	673	205	840	273	190	537	1136
ENSMUSG00000010122	0	7	4	0	4	4	3	6	0	0	0	5	0	3	9	0	0	3	0	1	1	4	10	0	0	1	0	1	3	0	0	1	0	0	0	0	1	1	0	0	0	0	0	6	4	0	1	0	0
ENSMUSG00000010136	0	0	0	0	0	0	0	0	0	0	0	0	0	0	0	0	0	0	0	0	0	0	0	1	0	0	0	0	0	0	0	0	0	0	0	0	0	0	0	0	0	0	0	0	0	0	0	0	0
ENSMUSG00000010142	39	0	63	0	0	5	9	1	1	38	2	10	23	12	0	45	1	0	1	4	39	4	5	14	1	1	1	8	8	3	0	1	14	1	1	46	24	93	81	53	7	3	329	1	32	14	113	0	146
ENSMUSG00000010154	1	0	0	1	1	0	2	0	0	1	0	0	1	1	0	0	2	0	7	0	1	0	0	1	6	0	0	0	0	0	0	0	2	0	0	0	1	0	0	0	1	2	3	0	2	0	0	0	3
ENSMUSG00000010175	6	2	4	58	26	60	22	45	67	17	24	5	140	6	15	58	96	244	5	108	74	11	13	21	3	38	10	14	4	57	38	40	15	70	4	2	23	76	3	29	13	17	18	65	15	35	30	65	0
ENSMUSG00000010205	786	681	524	967	1234	550	1321	863	858	1074	1267	952	528	460	640	615	981	941	417	973	396	552	803	796	870	684	698	883	1297	652	947	690	835	581	491	593	553	858	333	574	713	578	533	681	625	443	406	475	366
ENSMUSG00000010277	52	53	113	11	18	56	28	21	39	49	71	18	23	116	71	119	48	25	49	11	87	54	56	59	19	53	98	1	53	71	182	61	26	39	95	6	89	39	4	64	35	16	22	20	42	10	153	18	103
ENSMUSG00000010290	154	132	115	163	206	141	198	247	168	139	254	235	180	90	59	215	120	119	76	154	74	100	146	147	130	111	82	192	208	107	112	114	157	119	136	115	84	126	73	125	181	90	125	152	192	117	93	69	97
ENSMUSG00000010307	3	3	2	3	2	2	2	3	3	2	2	3	3	3	3	2	2	2	2	2	2	2	2	2	2	2	2	3	3	3	2	2	2	2	2	2	2	2	2	2	2	2	2	2	2	3	10	2	35
ENSMUSG00000010311	0	0	0	0	0	0	0	0	0	0	0	0	0	0	0	0	0	0	0	0	0	0	0	0	0	0	0	0	0	0	0	0	0	0	0	0	0	0	0	9	0	0	0	0	0	0	0	0	0
ENSMUSG00000010342	120	237	186	213	233	275	222	249	204	186	318	308	219	224	292	233	377	252	206	262	275	436	186	201	186	253	337	207	242	203	215	176	196	133	155	200	176	239	170	234	211	167	133	166	241	340	201	204	167
ENSMUSG00000010358	12	12	10	13	12	9	12	12	13	12	12	13	13	14	13	11	45	10	12	12	11	13	12	12	12	12	13	12	12	12	12	11	11	12	10	12	13	11	12	12	12	26	12	12	13	13	13	11	78
ENSMUSG00000010362	30	10	2	17	23	67	72	51	86	14	30	74	75	2	5	11	18	16	1	15	23	30	7	2	27	52	9	83	163	49	41	64	21	9	6	42	52	64	7	56	12	7	33	35	62	3	4	88	18
ENSMUSG00000010376	92	137	139	205	157	152	169	132	271	262	183	127	224	149	158	227	165	133	215	194	139	180	224	232	227	234	235	184	141	276	191	294	180	162	207	299	197	224	190	126	249	196	190	243	150	183	200	150	124
ENSMUSG00000010392	53	84	63	31	63	56	76	21	61	28	110	67	67	67	117	30	115	30	80	126	47	110	54	54	36	42	92	56	37	61	50	89	47	22	18	84	71	92	106	128	90	89	80	60	85	40	55	54	68
ENSMUSG00000010406	1	6	6	1	1	3	9	1	1	7	2	17	1	6	1	1	1	1	1	13	2	2	0	1	6	0	4	5	3	1	1	2	1	1	1	1	1	1	1	1	11	6	0	6	0	1	1	14	6
ENSMUSG00000010453	3	12	43	39	13	26	37	27	48	33	18	14	30	2	13	14	42	18	24	20	0	1	38	26	41	3	50	1	18	1	4	60	16	15	22	36	50	31	93	19	15	3	20	6	23	44	31	26	151
ENSMUSG00000010461	0	0	1	0	0	0	1	0	2	1	1	0	0	2	1	0	2	2	4	1	2	1	2	1	0	0	2	1	1	0	2	0	0	0	1	1	1	1	0	0	1	0	0	0	6	1	3	6	0
ENSMUSG00000010476	0	25	9	7	10	13	29	5	11	3	16	21	15	8	7	15	24	9	17	6	17	16	15	24	18	3	16	16	7	19	12	8	4	13	12	19	7	9	17	18	14	12	12	16	16	13	11	4	0
ENSMUSG00000010492	1	3	1	9	1	6	1	3	1	4	4	7	6	2	4	2	12	9	2	1	3	2	2	6	3	1	1	1	5	1	1	1	6	1	5	1	4	2	1	3	5	7	1	1	3	1	3	4	0
ENSMUSG00000010505	58	14	35	21	28	10	20	16	18	28	14	13	86	57	47	58	68	62	68	35	24	30	27	28	20	21	20	25	19	11	27	11	22	14	14	17	20	28	13	17	19	28	30	19	19	14	17	32	73
ENSMUSG00000010517	300	354	356	230	234	191	211	221	270	252	279	384	266	356	370	273	280	399	520	220	180	267	233	188	251	256	246	238	152	158	154	211	143	275	242	152	197	222	165	230	237	190	136	133	181	162	160	203	744
ENSMUSG00000010538	3	3	7	4	2	2	2	5	8	2	3	3	4	5	3	10	3	3	2	5	2	2	45	2	4	1	1	2	2	3	2	2	2	2	5	2	2	2	2	2	5	10	1	2	33	2	2	3	2
ENSMUSG00000010554	15	58	52	44	96	50	34	35	74	77	90	47	76	34	41	59	34	32	15	65	83	70	88	62	70	52	53	74	60	58	67	53	112	75	121	76	75	52	105	121	25	70	68	125	22	61	154	75	111
ENSMUSG00000010592	2444	2262	3066	2350	1834	1591	2129	2133	2157	2858	2582	1725	3626	2256	2097	3176	2918	2881	3502	3434	3076	2475	2745	2464	2149	2948	2995	2839	2723	2736	1590	3269	3545	2860	4146	3043	2467	2080	2102	2312	2273	2495	2413	2531	2522	3763	2616	2098	454
ENSMUSG00000010601	1	1	0	1	1	1	1	1	1	1	1	1	1	1	1	1	0	2	1	1	1	1	1	1	1	1	1	1	1	1	1	1	1	1	1	1	1	1	1	1	1	1	1	1	1	1	1	1	0
ENSMUSG00000010607	536	454	191	331	290	311	307	476	359	430	470	435	169	214	213	293	345	168	232	425	230	276	186	252	654	551	593	479	573	337	529	608	480	450	431	345	268	393	207	348	253	191	151	300	216	168	344	241	122
ENSMUSG00000010608	4974	5037	4789	5010	4124	5168	5389	6314	5276	5460	5831	5823	2960	3966	3869	3491	3312	3375	3911	3774	3926	4819	4276	4998	5939	6047	6771	7255	6762	5943	6109	5969	6259	6866	5998	6372	5201	3480	4323	4978	4263	3413	4482	5655	3593	5431	4075	3907	376
ENSMUSG00000010609	456	590	792	728	714	538	552	646	777	899	575	417	699	496	690	483	670	909	730	841	707	609	440	899	563	957	664	525	879	584	544	1031	1285	921	1297	1162	678	740	790	972	390	508	703	842	574	897	1010	1134	265
ENSMUSG00000010651	1	0	2	1	0	0	14	0	0	3	0	0	1	1	1	0	0	2	0	0	1	3	0	8	0	0	0	0	0	1	0	0	0	0	0	0	0	0	0	0	0	0	0	8	0	0	0	0	0
ENSMUSG00000010660	0	0	0	0	0	0	0	0	0	0	0	0	0	0	0	0	0	1	0	0	0	0	0	0	0	0	0	0	0	0	0	0	0	0	0	0	0	0	0	0	0	0	0	0	0	0	0	1	0
ENSMUSG00000010663	0	0	0	0	0	0	0	0	0	0	0	0	0	0	0	0	0	0	0	0	0	0	0	0	0	0	0	0	0	0	0	0	0	0	0	0	0	0	0	0	0	0	0	0	0	0	0	0	0
ENSMUSG00000010721	773	867	1034	954	908	1060	948	1057	1043	976	853	1060	648	839	605	662	834	773	782	819	879	677	594	825	685	923	839	721	779	1072	559	1051	1066	905	1214	1097	691	530	681	742	645	565	794	837	616	1055	1070	679	276
ENSMUSG00000010751	0	0	0	0	0	0	0	0	0	0	0	0	0	0	0	0	0	0	0	2	0	0	0	0	0	0	0	0	0	0	0	0	0	0	0	0	0	0	0	0	0	0	0	0	0	0	0	0	1
ENSMUSG00000010755	24	32	56	56	17	27	27	27	38	34	27	23	26	31	48	47	23	30	25	35	51	26	29	22	54	34	44	15	57	32	70	36	18	33	24	16	43	25	27	22	33	28	38	45	28	52	30	39	39
ENSMUSG00000010760	12	11	10	4	11	2	30	9	28	9	20	26	20	6	18	19	26	2	13	5	16	19	29	4	14	5	25	36	33	1	22	6	30	11	22	14	44	16	43	3	19	7	16	63	31	10	11	29	8
ENSMUSG00000010796	234	229	213	307	227	346	218	265	268	224	262	296	268	194	218	245	217	260	208	232	258	357	403	325	301	242	238	271	256	272	246	205	222	203	235	257	328	353	238	269	242	268	201	256	262	287	182	264	87
ENSMUSG00000010797	1	0	0	1	1	0	0	0	0	0	1	1	1	1	1	1	1	0	0	0	0	1	1	0	0	0	0	1	0	1	1	6	0	7	0	3	1	1	0	0	0	6	0	0	12	0	0	0	0
ENSMUSG00000010803	42	0	17	8	13	18	15	24	3	32	9	17	61	66	51	41	36	49	43	32	39	37	17	26	4	19	10	6	10	22	4	38	8	5	8	30	39	22	19	35	26	32	26	23	43	75	142	46	154
ENSMUSG00000010825	0	1	0	1	0	0	1	1	1	0	0	0	1	1	0	0	0	0	4	1	0	0	0	0	1	1	2	0	1	0	0	0	0	0	0	0	0	0	0	0	0	0	0	0	1	1	1	2	0
ENSMUSG00000010830	6	4	47	49	3	2	3	30	14	25	57	4	20	7	5	28	24	32	3	18	2	3	46	18	2	2	5	3	42	4	4	23	3	3	16	3	3	4	3	2	28	7	43	2	2	3	3	3	1
ENSMUSG00000010841	0	0	0	0	0	0	0	0	0	0	0	0	0	0	0	0	0	0	0	0	0	0	0	0	0	0	0	0	0	0	0	0	0	0	0	0	0	0	0	0	0	0	0	0	0	0	0	1	0
ENSMUSG00000010911	166	169	109	183	104	169	170	181	228	215	215	171	125	187	131	158	200	152	156	108	117	139	108	134	254	167	235	196	230	192	233	232	197	152	145	181	251	213	146	245	195	213	115	157	153	242	109	142	53
ENSMUSG00000010914	1166	1349	1271	1167	1027	896	1095	933	965	1062	1084	1185	895	818	1108	914	916	1053	1181	950	789	1088	813	972	1360	1312	1397	857	1189	1268	1061	1033	1066	1041	984	904	1033	1010	986	856	901	969	633	922	911	1138	842	961	689
ENSMUSG00000010936	343	243	481	352	228	279	238	407	136	344	330	291	232	408	274	379	370	445	270	149	265	212	348	300	459	200	476	180	344	521	363	171	284	287	254	155	355	330	575	290	666	490	553	286	536	296	186	274	1037
ENSMUSG00000011008	0	0	0	0	0	0	0	0	0	0	0	0	5	0	0	0	0	1	0	0	0	0	0	4	0	0	0	0	0	0	0	0	0	0	0	0	0	0	0	0	0	0	0	0	0	0	0	0	0
ENSMUSG00000011034	0	0	0	0	0	0	0	0	0	1	1	0	0	0	0	0	1	1	0	0	0	0	0	0	0	0	0	0	0	0	0	0	0	0	0	0	0	0	0	0	0	0	0	0	0	0	1	0	0
ENSMUSG00000011096	174	156	238	197	169	165	196	204	190	162	208	246	204	156	115	164	135	195	148	148	72	182	124	197	290	276	254	340	314	250	204	150	177	194	187	176	256	316	313	149	366	214	209	266	202	142	155	258	228
ENSMUSG00000011114	48	34	21	58	38	25	22	35	45	40	53	38	49	7	41	47	51	36	37	24	38	21	49	20	35	45	44	29	68	26	42	24	51	38	59	28	30	39	33	35	39	22	27	21	32	46	19	27	98
ENSMUSG00000011148	13	5	116	13	7	25	10	6	30	4	7	9	10	15	12	9	9	6	6	5	2	7	8	9	50	1	20	5	3	9	8	4	4	3	2	4	6	12	5	2	1	20	10	6	24	3	41	6	11
ENSMUSG00000011158	6	26	16	122	23	8	28	13	64	16	60	4	4	67	109	89	3	2	104	7	16	4	5	111	15	16	26	4	3	118	10	113	21	107	49	2	4	39	3	2	71	3	74	48	73	26	1	3	100
ENSMUSG00000011179	764	803	771	827	488	446	630	449	664	729	719	610	826	1036	831	1110	694	744	1305	913	785	1277	1187	912	1135	886	968	1037	649	1009	581	826	749	600	779	634	1340	945	1227	1448	1375	1354	1200	980	963	1066	752	1008	618
ENSMUSG00000011254	88	95	38	35	68	39	35	33	59	81	34	29	23	79	26	63	81	69	69	52	46	94	188	117	50	49	49	70	57	41	74	36	43	52	48	63	102	9	91	81	18	13	41	37	64	51	42	69	62
ENSMUSG00000011256	0	0	0	0	0	1	0	0	0	0	0	0	0	0	0	0	2	0	0	0	0	0	0	0	0	0	0	0	0	0	0	0	0	0	0	0	0	0	13	6	0	0	0	0	0	0	4	0	1
ENSMUSG00000011257	603	466	479	495	264	491	315	473	365	345	434	421	384	413	337	360	385	348	436	364	332	392	502	390	486	378	473	426	360	528	401	274	282	303	364	389	288	334	360	420	548	292	330	252	258	297	312	352	607
ENSMUSG00000011263	27	37	47	35	35	31	35	38	40	41	39	41	38	46	54	41	81	40	49	39	43	41	33	39	27	34	36	29	27	36	28	38	33	40	37	42	37	26	36	43	32	40	41	32	40	43	50	42	1316
ENSMUSG00000011267	997	1060	836	2288	1218	1173	1147	1012	606	1169	1249	1362	933	1071	946	797	962	991	757	1075	1275	690	1209	1160	1095	711	1288	1469	1368	1091	1138	1561	1326	1200	1088	877	2036	1954	1862	1456	1828	2351	2084	1883	1494	1400	1246	1510	1339
ENSMUSG00000011306	187	39	24	9	133	119	154	52	41	114	39	103	7	111	9	7	8	39	72	21	17	160	6	96	76	46	32	177	169	91	32	17	4	81	51	35	159	42	115	50	68	55	83	29	63	87	26	254	77
ENSMUSG00000011349	1	1	0	1	0	0	0	1	1	1	1	1	1	1	1	0	0	2	0	0	0	0	0	0	0	0	0	0	0	1	0	0	0	0	0	0	0	0	0	0	0	0	0	0	0	1	1	0	0
ENSMUSG00000011350	0	0	0	0	0	0	0	0	0	0	0	0	0	0	0	0	0	0	0	0	0	0	0	0	0	0	0	0	0	0	0	0	0	0	0	0	0	0	0	0	0	0	0	0	0	0	0	0	0
ENSMUSG00000011382	3	4	1	2	2	1	27	8	1	1	2	2	2	2	2	2	12	1	1	2	1	2	6	4	1	1	1	2	2	2	2	1	1	28	1	1	2	3	2	1	1	1	1	1	1	1	1	2	27
ENSMUSG00000011427	29	99	4	142	51	65	60	46	61	31	36	43	79	37	21	8	127	47	100	48	19	18	74	30	51	60	83	10	53	51	43	64	89	48	140	22	104	58	104	61	13	44	127	55	64	2	20	69	131
ENSMUSG00000011463	27	57	48	41	41	18	34	43	42	23	40	31	22	44	72	27	44	74	68	46	31	53	28	42	29	32	26	35	11	48	21	12	75	32	51	24	37	24	33	24	71	47	60	53	31	101	28	23	58
ENSMUSG00000011486	7	9	8	10	6	5	7	8	8	8	7	7	11	13	9	7	7	6	6	6	6	6	5	6	5	7	7	5	6	7	6	7	6	8	7	8	6	4	7	7	4	5	6	5	7	9	9	7	17
ENSMUSG00000011589	584	571	879	462	496	915	886	846	686	471	552	727	502	308	417	405	609	348	251	451	617	262	273	402	704	540	674	811	643	548	850	756	496	723	886	866	532	456	698	327	391	318	285	568	534	370	212	412	514
ENSMUSG00000011632	76	22	62	42	37	73	40	91	112	44	48	46	21	96	54	53	58	23	123	85	43	67	17	61	19	88	58	46	27	42	11	56	60	33	71	34	88	93	3	87	119	31	62	61	31	109	51	68	29
ENSMUSG00000011658	1	12	1	1	2	1	1	1	1	1	1	2	1	1	2	1	4	1	2	2	2	2	2	2	1	15	1	2	1	4	2	1	1	1	1	1	2	2	1	1	2	2	2	2	1	1	1	1	0
ENSMUSG00000011751	2	1	1	2	1	3	1	1	1	1	1	1	2	2	1	1	3	9	1	1	0	1	1	3	1	1	1	1	1	1	1	1	1	1	1	1	1	1	1	1	1	0	1	1	1	1	1	1	0
ENSMUSG00000011752	4	10	6	8	2	1	3	9	11	8	3	2	1	12	16	8	6	5	8	12	6	9	5	0	5	5	2	3	6	0	17	12	3	3	6	3	9	7	10	6	6	6	19	11	2	4	4	9	10
ENSMUSG00000011831	3434	3858	4491	3498	3313	3132	3817	3222	3496	3782	4898	4415	3999	4016	4117	4216	4407	4979	4476	4034	3253	3996	2863	3780	2929	3717	3446	3343	3331	3670	2743	3280	3043	3371	3868	2962	2119	2399	2079	2541	2672	2754	3201	2491	3034	2578	3113	2896	1959
ENSMUSG00000011832	7	38	4	9	3	14	2	7	14	3	43	10	10	13	73	4	15	31	43	29	3	2	2	19	15	22	1	19	2	5	54	3	32	3	9	3	3	9	3	30	10	6	11	6	19	3	3	15	37
ENSMUSG00000011837	778	245	392	91	109	114	67	140	134	78	115	209	211	47	21	236	36	123	85	59	292	319	14	102	223	335	29	77	167	634	376	102	290	322	115	12	25	225	61	133	156	286	97	190	291	116	86	233	456
ENSMUSG00000011877	150	298	250	227	214	210	120	200	211	184	177	146	153	307	204	248	200	235	150	197	371	210	140	232	255	212	201	243	302	150	519	255	190	288	254	176	198	264	231	255	165	289	151	223	194	187	117	202	490
ENSMUSG00000011884	114	153	233	99	171	143	141	119	118	174	257	175	265	245	229	228	250	265	186	227	158	138	84	234	72	67	66	99	123	66	90	134	130	159	146	160	64	63	99	105	86	119	93	95	98	114	153	121	322
ENSMUSG00000011958	14	36	16	29	46	19	25	30	17	26	30	14	13	13	17	16	28	19	28	14	27	13	27	18	24	31	21	21	23	18	9	20	18	22	29	24	16	14	19	13	19	8	5	21	13	21	22	13	6
ENSMUSG00000011960	418	552	670	535	723	456	496	846	877	612	365	352	484	697	469	376	593	404	498	683	522	429	903	541	473	651	566	779	522	386	322	831	860	878	761	949	640	623	857	582	762	515	570	793	408	1180	619	1014	330
ENSMUSG00000012017	0	0	0	0	0	0	2	0	0	0	0	0	0	0	0	0	0	1	0	0	0	0	0	0	0	0	0	0	0	0	0	0	0	0	0	0	0	0	0	0	0	0	0	0	0	0	0	1	0
ENSMUSG00000012042	0	0	0	0	0	0	0	3	0	0	0	4	0	1	0	0	0	0	0	1	1	2	0	3	0	0	1	0	0	2	0	1	2	0	0	0	0	4	0	3	0	1	0	2	2	0	0	1	32
ENSMUSG00000012076	77	58	78	51	66	71	58	61	70	62	62	67	86	58	76	91	106	100	80	53	63	38	33	57	40	34	27	43	59	28	55	35	23	27	27	14	17	41	30	35	49	21	35	44	38	30	24	31	108
ENSMUSG00000012114	1572	1517	1325	1804	2031	1267	2058	1504	1577	1912	1866	2014	1172	1712	1762	1615	1691	2314	1123	1873	1211	1789	1604	1843	1647	1377	1286	1850	1986	1199	1755	1306	1892	1485	1142	1308	1388	1775	993	1179	1766	1294	1372	1586	1410	1675	1220	1509	1076
ENSMUSG00000012117	61	4	85	28	32	11	130	83	2	4	6	7	7	122	30	57	61	20	62	5	37	21	58	9	25	34	26	27	26	7	6	37	4	3	3	4	5	25	97	74	52	60	66	44	19	44	108	91	50
ENSMUSG00000012123	20	23	27	27	20	15	74	20	20	23	23	25	28	35	33	25	25	23	25	20	40	23	19	20	13	31	15	16	14	23	18	21	19	21	19	22	20	16	20	21	13	14	157	16	17	23	24	24	24
ENSMUSG00000012126	1	0	0	1	1	0	1	0	0	0	1	1	1	0	0	0	4	4	0	1	0	1	1	1	1	1	1	7	1	1	1	0	1	0	0	0	1	1	1	0	1	1	0	1	1	0	0	0	0
ENSMUSG00000012187	0	0	0	0	0	0	0	0	0	0	0	0	0	0	0	0	0	0	0	0	0	0	0	0	0	0	0	0	0	0	0	0	0	0	0	0	0	0	0	0	0	0	0	0	0	0	0	0	0
ENSMUSG00000012211	0	0	0	0	0	0	0	0	0	0	0	0	0	0	0	0	0	0	0	0	0	0	0	0	0	0	0	0	0	0	0	0	0	0	0	0	0	0	0	0	0	0	0	0	0	0	2	0	0
ENSMUSG00000012282	0	0	0	4	0	5	4	0	3	6	0	4	0	3	0	0	5	1	2	3	2	0	0	4	5	0	0	0	0	0	0	0	6	0	0	1	0	7	9	6	3	0	0	4	0	7	3	0	3
ENSMUSG00000012296	1106	1379	1185	1278	1475	1163	1854	1600	1240	1489	1524	1617	984	877	1120	962	1019	1325	811	1343	981	1120	1103	1412	1610	1235	1199	1697	1734	1108	1459	1045	1380	1161	1018	1236	964	1035	928	1235	1369	817	1203	1292	983	778	960	1090	239
ENSMUSG00000012350	269	315	477	395	386	341	397	356	321	586	348	382	297	292	240	257	280	319	413	394	354	311	284	341	331	505	471	433	399	599	418	636	642	476	720	794	373	226	316	485	213	296	435	428	197	599	519	393	280
ENSMUSG00000012396	0	0	0	0	0	0	0	0	0	0	0	0	0	0	0	0	0	1	0	0	0	0	0	0	0	0	0	0	0	0	0	0	0	0	0	0	0	0	0	0	0	0	0	0	0	0	0	0	0
ENSMUSG00000012405	428	455	598	503	564	537	443	582	495	419	550	609	314	389	282	379	324	317	350	342	396	368	402	326	550	485	506	628	489	637	469	450	459	499	485	487	476	270	340	388	347	256	369	338	296	346	323	296	234
ENSMUSG00000012422	0	21	5	44	9	2	9	1	15	4	0	1	7	0	3	12	4	13	17	8	9	0	0	7	27	0	1	9	10	10	15	7	19	19	7	1	6	10	10	6	2	28	3	23	9	16	8	4	21
ENSMUSG00000012428	17	49	37	31	42	51	33	48	34	52	55	47	31	27	22	34	40	59	48	70	54	26	26	47	30	22	39	34	47	36	28	47	40	35	61	47	28	19	30	46	56	47	58	58	49	46	58	26	0
ENSMUSG00000012429	2	2	6	2	2	2	2	2	2	2	2	2	2	2	2	30	2	2	5	2	2	13	2	2	8	1	20	1	1	2	1	2	2	2	7	8	2	1	2	2	1	1	6	1	1	2	2	14	32
ENSMUSG00000012443	484	335	705	461	352	513	553	704	640	828	667	732	1287	805	925	841	936	787	842	701	612	622	487	631	268	442	215	314	291	323	282	505	310	395	367	438	555	328	295	440	453	523	451	293	504	384	507	539	484
ENSMUSG00000012483	50	10	16	10	13	25	21	19	20	24	22	21	29	35	43	39	31	24	43	22	23	26	24	24	24	18	15	15	16	11	21	16	16	18	11	20	15	15	12	12	12	17	16	16	12	17	14	13	9
ENSMUSG00000012519	112	122	12	7	15	38	11	121	3	54	119	131	277	59	15	25	199	25	315	176	107	9	127	25	44	36	42	4	105	7	287	138	19	57	35	5	27	8	52	32	35	10	56	43	3	4	136	20	8
ENSMUSG00000012520	0	0	0	0	0	1	0	0	0	0	0	0	0	0	0	0	2	1	0	0	0	0	0	0	0	0	0	0	0	0	0	0	0	0	0	0	0	0	0	0	2	0	0	0	0	0	0	1	0
ENSMUSG00000012535	334	1191	776	1217	833	1120	1051	1007	1349	1187	2192	315	1706	1400	1630	1281	706	827	1389	1200	1153	2341	945	1088	991	1659	1386	1184	1055	833	1136	780	1319	1705	1521	1989	1104	1699	737	945	896	972	1025	1867	941	2668	2727	1411	181
ENSMUSG00000012609	450	696	462	707	743	649	845	672	572	806	640	655	582	575	440	646	688	688	547	676	614	553	579	736	589	506	542	635	536	598	561	506	699	571	493	428	777	615	639	593	556	652	510	567	681	554	696	614	238
ENSMUSG00000012640	13	70	5	40	29	42	32	15	28	22	47	35	6	29	5	49	22	38	3	6	10	90	8	11	14	22	15	23	19	44	18	55	9	14	4	54	18	24	32	0	26	19	11	1	11	23	17	14	12
ENSMUSG00000012705	0	0	0	0	0	0	0	0	0	0	0	0	0	0	0	0	0	0	0	0	0	0	0	0	0	0	0	0	0	0	0	0	0	0	0	0	0	0	0	0	0	0	1	0	1	0	0	0	0
ENSMUSG00000012777	1	9	12	19	0	7	1	3	1	1	25	0	2	2	3	22	16	9	0	12	0	9	0	0	1	12	1	24	5	1	2	0	0	1	1	1	0	0	11	1	1	3	11	17	1	5	1	6	0
ENSMUSG00000012819	2	3	0	3	8	0	8	2	8	1	1	10	4	4	0	1	9	8	8	5	0	7	18	2	1	2	2	4	11	1	0	1	7	1	1	14	0	1	1	17	7	10	9	0	1	2	1	5	0
ENSMUSG00000012848	76	146	218	113	137	200	300	66	380	62	265	227	167	141	301	326	126	127	171	159	132	310	197	120	150	408	282	61	330	272	388	152	416	62	221	193	429	273	312	273	341	244	373	396	380	469	300	379	767
ENSMUSG00000012889	0	0	0	0	0	0	0	0	0	0	0	0	0	0	0	0	1	0	0	0	0	0	0	0	0	0	0	0	0	0	0	0	0	0	2	0	0	0	0	0	0	0	0	0	4	0	0	0	0
ENSMUSG00000013033	118	37	136	89	81	85	66	124	48	115	122	82	29	19	10	57	130	68	22	38	24	38	5	46	48	127	81	85	79	95	162	128	73	64	120	82	70	42	94	36	51	38	76	12	99	56	133	35	11
ENSMUSG00000013076	1	0	2	2	0	7	10	2	9	2	4	4	12	0	0	9	9	0	0	5	4	11	0	4	8	0	3	6	1	9	0	8	2	3	11	15	0	4	8	0	0	0	3	2	8	4	4	0	1
ENSMUSG00000013083	0	0	0	0	0	0	0	0	0	0	0	0	0	0	0	0	0	0	0	1	4	0	0	0	0	0	0	0	0	0	0	3	0	8	0	0	0	0	0	0	0	0	0	0	0	0	0	0	0
ENSMUSG00000013089	14	11	1	10	20	39	64	18	15	22	18	17	44	65	16	20	42	48	31	13	46	62	77	36	20	21	3	24	19	43	50	27	12	4	33	1	38	51	64	28	28	23	24	29	58	35	45	69	55
ENSMUSG00000013091	1	1	1	1	1	1	1	1	1	1	1	1	1	1	1	1	1	1	1	1	1	1	1	1	1	1	1	1	1	1	1	1	1	1	1	1	1	1	1	1	1	1	1	1	1	1	1	1	0
ENSMUSG00000013150	182	14	30	18	24	23	15	289	229	130	123	28	316	22	40	32	99	31	43	28	83	33	243	22	11	10	11	171	99	22	383	20	20	18	17	20	23	27	61	19	70	149	19	125	15	17	154	29	100
ENSMUSG00000013155	0	0	0	0	3	3	0	5	0	0	0	0	0	4	0	0	0	1	2	0	0	2	0	0	0	0	0	0	0	5	0	0	0	0	0	0	0	2	3	5	1	8	2	0	1	1	2	1	1
ENSMUSG00000013158	0	0	0	2	0	0	3	11	3	0	3	6	0	0	1	2	7	3	2	0	1	1	2	0	3	0	2	0	0	1	0	0	5	1	2	23	8	3	2	0	0	1	0	11	0	3	5	0	0
ENSMUSG00000013160	646	289	334	394	254	261	308	295	297	261	397	259	283	274	225	222	280	255	414	324	289	332	207	264	561	403	649	591	498	479	341	507	248	433	388	492	359	423	443	381	762	692	357	293	468	284	342	453	290
ENSMUSG00000013236	168	47	21	227	180	44	88	142	141	91	131	96	54	51	132	57	81	105	107	78	141	73	246	84	122	143	106	137	137	54	114	107	160	240	123	138	71	161	76	153	69	115	97	97	137	117	139	93	138
ENSMUSG00000013275	254	212	183	241	173	122	203	146	141	120	101	143	105	83	113	116	136	166	139	70	86	108	148	190	179	150	115	273	121	140	155	115	171	165	127	106	125	95	131	102	94	119	84	173	139	105	122	62	158
ENSMUSG00000013338	0	0	0	0	0	0	0	0	0	0	0	0	0	0	0	0	0	1	0	0	0	0	0	0	0	0	0	0	0	0	0	0	0	0	0	0	0	0	0	0	0	0	0	0	0	0	0	0	0
ENSMUSG00000013353	0	0	0	0	0	0	0	0	0	0	0	0	0	0	0	0	0	0	0	0	0	0	0	0	0	0	0	9	0	0	0	0	0	0	0	0	0	0	0	7	0	0	0	0	0	0	0	1	0
ENSMUSG00000013367	0	0	0	0	0	0	0	0	0	0	0	0	0	0	0	0	0	0	0	0	1	1	0	0	0	0	0	0	0	0	0	0	0	0	0	0	0	0	0	0	0	0	0	0	0	0	0	0	0
ENSMUSG00000013415	6	39	81	119	55	72	76	132	5	58	17	55	30	89	5	202	122	27	83	15	118	83	4	139	56	105	63	35	133	49	47	63	20	34	33	5	142	217	5	151	132	4	77	100	104	149	143	36	158
ENSMUSG00000013418	7	7	9	8	7	21	6	7	135	105	8	85	8	10	11	9	9	18	9	33	16	8	15	7	5	6	33	41	5	43	6	7	7	7	7	8	7	6	7	7	5	6	7	63	7	8	63	8	6
ENSMUSG00000013419	4	3	21	3	3	2	3	2	9	2	3	3	3	3	2	2	5	4	2	2	2	29	3	3	3	2	2	3	3	3	3	2	2	2	2	2	3	4	2	2	2	5	2	3	6	2	2	2	2
ENSMUSG00000013465	554	1159	1161	547	1255	623	888	854	1154	676	558	615	734	767	488	936	495	611	603	566	1016	997	898	861	863	555	784	1048	859	444	786	838	1055	649	788	1485	701	773	794	868	804	288	375	1058	398	762	267	785	55
ENSMUSG00000013483	0	2	0	0	0	0	0	0	0	0	0	0	0	0	0	0	2	1	0	0	0	0	0	0	0	0	0	0	0	0	0	0	0	0	0	0	0	0	0	0	0	0	0	0	0	0	0	0	0
ENSMUSG00000013495	150	314	283	283	219	299	202	252	328	282	258	376	210	272	249	237	254	225	180	282	190	235	241	173	229	169	200	341	233	239	152	227	321	190	134	250	228	206	270	258	288	268	306	218	287	155	176	166	141
ENSMUSG00000013523	4	54	75	126	53	46	23	77	85	29	47	118	61	125	54	47	82	52	37	96	43	50	31	44	80	32	68	51	28	25	125	60	52	56	62	51	51	53	34	34	48	46	21	47	77	22	30	128	148
ENSMUSG00000013539	28	43	84	93	53	25	38	105	41	67	39	28	11	31	58	33	21	25	45	22	31	16	51	22	74	97	60	79	50	84	29	27	19	2	33	31	65	107	23	6	51	38	20	33	86	43	43	60	67
ENSMUSG00000013562	0	0	0	0	0	0	0	0	0	0	0	0	0	0	0	0	0	0	0	0	0	0	0	0	0	0	0	0	0	0	0	1	0	0	1	0	1	0	0	0	0	0	0	0	0	0	0	0	0
ENSMUSG00000013584	44	33	25	27	16	21	19	13	18	18	24	11	10	34	18	34	10	20	23	13	31	12	13	7	8	7	21	7	17	13	12	25	14	11	19	11	9	13	13	4	11	8	4	5	5	7	11	11	23
ENSMUSG00000013593	81	178	86	95	74	290	128	122	242	264	54	129	252	122	89	43	64	186	124	110	135	64	117	97	137	90	55	128	132	108	78	64	173	90	78	414	158	298	207	157	187	255	141	193	179	133	78	114	5
ENSMUSG00000013611	1	1	0	1	1	0	1	1	1	1	1	1	1	1	1	0	0	0	4	1	1	1	1	1	1	1	1	1	1	1	1	1	1	1	1	1	1	1	1	1	1	1	1	1	1	1	1	7	0
ENSMUSG00000013622	546	253	381	257	388	482	383	325	291	476	358	316	239	363	276	114	636	312	254	130	266	629	171	566	406	378	369	324	393	161	270	250	620	714	88	734	547	490	474	287	312	753	305	348	455	352	408	318	148
ENSMUSG00000013629	38	19	26	41	30	16	131	70	11	21	60	38	33	48	52	38	39	88	34	26	16	37	38	390	222	72	28	129	207	34	60	19	20	104	187	18	141	591	66	14	107	69	73	75	219	85	13	29	193
ENSMUSG00000013646	2	2	16	7	81	9	34	6	33	47	14	8	2	57	1	15	1	2	1	16	1	1	2	2	9	4	5	38	4	17	2	9	22	2	4	2	2	16	2	2	41	4	3	40	8	2	2	1	23
ENSMUSG00000013662	2316	2175	2444	2306	2129	2050	2114	2627	2586	2300	2216	2341	2336	2441	2191	2227	2238	2732	2668	2346	1976	2169	2163	2557	1427	1745	1497	1686	1679	1720	1617	1879	1784	1754	1776	1720	1543	1346	1641	1415	1493	1325	1811	1234	1955	1983	1767	1701	787
ENSMUSG00000013663	423	635	873	1397	559	853	1070	1014	958	907	1218	935	766	698	687	771	622	573	1208	840	493	724	944	942	537	918	952	1106	942	1097	432	1425	677	701	1636	912	444	559	653	936	483	545	626	580	793	747	1016	791	690
ENSMUSG00000013668	0	0	0	0	0	0	0	0	2	0	1	1	0	0	0	0	0	1	0	0	0	0	0	0	0	0	0	0	0	0	0	0	0	0	0	0	0	0	0	1	0	0	0	0	1	0	0	0	0
ENSMUSG00000013698	0	0	0	0	0	0	0	0	0	0	0	0	0	0	1	0	0	0	0	0	0	0	0	0	0	0	0	0	0	0	0	0	0	0	0	0	0	0	0	0	0	0	0	0	0	0	0	0	0
ENSMUSG00000013701	59	61	51	74	101	54	138	89	119	104	89	93	89	69	80	43	40	74	66	108	64	86	116	131	114	102	90	145	126	82	104	127	155	121	51	82	170	153	62	86	84	73	106	140	70	107	86	86	44
ENSMUSG00000013707	9	11	13	11	11	10	11	11	11	12	12	13	11	13	15	13	25	12	15	12	13	13	12	12	9	10	11	10	9	11	10	11	11	12	11	12	12	10	11	12	11	12	12	11	12	12	13	13	56
ENSMUSG00000013736	365	322	356	343	276	367	320	407	331	358	339	363	371	269	242	352	345	345	479	310	304	344	313	321	260	286	213	192	163	276	225	274	268	269	207	246	241	200	257	211	226	262	228	150	262	279	247	207	116
ENSMUSG00000013766	0	4	0	3	0	7	1	1	6	3	2	4	0	0	0	4	3	13	0	1	0	4	0	0	5	1	6	0	1	0	0	0	0	3	0	0	0	10	0	0	0	1	0	0	4	1	1	8	0
ENSMUSG00000013787	117	55	49	63	2	78	123	4	24	4	32	97	7	25	13	6	12	59	4	59	12	160	97	253	25	15	7	21	127	32	13	61	3	206	57	84	68	59	94	69	121	54	293	9	68	80	13	98	28
ENSMUSG00000013822	520	265	213	338	520	389	362	430	463	412	514	604	311	150	206	123	195	116	224	338	200	212	271	255	708	458	570	687	843	609	509	500	455	502	460	423	361	384	549	419	403	618	455	514	448	452	288	353	381
ENSMUSG00000013833	227	334	112	141	99	106	115	173	119	129	32	106	40	209	142	290	177	170	228	169	144	113	419	148	60	191	75	159	76	95	112	122	160	356	153	387	145	106	182	152	27	161	239	153	41	221	193	86	51
ENSMUSG00000013846	0	0	0	0	0	0	0	0	0	0	0	0	0	0	0	0	0	0	0	0	0	0	0	0	0	0	0	0	0	0	0	0	0	0	0	0	0	0	0	0	0	0	0	0	0	0	0	0	0
ENSMUSG00000013858	1	2	1	1	8	1	10	13	7	2	1	1	0	23	44	68	14	1	2	28	15	2	2	3	5	3	2	3	1	1	1	16	4	22	9	19	8	3	42	1	1	8	12	41	3	11	9	7	14
ENSMUSG00000013878	541	463	562	638	521	448	569	683	647	569	440	486	429	417	455	503	492	503	550	435	535	877	493	545	490	543	515	503	442	551	447	473	429	486	530	488	423	452	514	566	503	532	418	464	623	509	575	490	131
ENSMUSG00000013921	7	8	0	22	18	0	8	4	17	16	13	22	52	9	2	22	37	17	31	77	10	48	47	6	32	16	3	13	21	0	11	9	4	2	1	21	11	21	8	12	25	6	12	22	27	10	3	14	1
ENSMUSG00000013928	0	0	0	0	0	2	0	0	0	0	0	0	0	0	0	6	0	0	0	0	0	0	0	0	0	0	0	0	0	0	0	0	0	0	0	0	0	0	1	0	0	0	0	0	0	0	0	0	0
ENSMUSG00000013936	0	0	0	0	0	0	0	0	0	0	0	0	0	0	0	0	0	0	0	0	0	0	0	0	0	0	0	0	0	0	0	0	0	0	0	0	0	0	0	0	0	0	0	0	0	0	0	0	0
ENSMUSG00000013973	3	5	4	4	2	2	3	2	1	2	8	4	3	2	5	6	2	4	4	0	5	1	9	2	5	8	6	3	7	16	0	2	2	4	3	4	8	6	12	5	12	13	4	2	8	4	4	6	41
ENSMUSG00000013974	0	4	0	0	0	1	4	0	0	4	2	0	0	0	0	3	0	0	0	0	0	0	0	0	8	3	0	3	2	0	7	5	5	0	0	0	5	1	2	0	0	2	7	0	3	2	1	2	0
ENSMUSG00000013997	2	5	47	12	3	10	8	14	22	9	29	38	11	38	23	4	37	13	5	42	6	32	8	3	19	18	8	6	13	25	8	13	7	4	14	1	27	2	43	15	21	13	12	13	6	6	29	23	28
ENSMUSG00000014030	0	0	0	0	0	0	0	0	0	0	0	0	0	0	0	1	0	0	0	0	0	0	0	0	0	0	0	0	0	0	0	0	0	0	0	0	0	0	1	0	0	0	3	0	0	0	0	1	0
ENSMUSG00000014039	216	160	143	69	81	214	228	48	300	11	91	198	7	354	40	8	67	296	11	11	42	197	10	284	174	110	16	33	59	305	8	187	122	11	213	58	139	280	10	96	211	87	84	413	232	101	481	157	56
ENSMUSG00000014074	203	164	217	193	165	277	245	258	216	268	262	201	153	175	156	125	152	147	246	202	225	194	204	221	292	278	260	248	264	234	250	262	316	308	356	297	156	213	296	345	166	156	184	274	175	241	337	233	144
ENSMUSG00000014075	5	24	5	2	21	9	19	11	7	10	11	29	9	6	11	7	9	7	11	23	21	8	4	9	28	5	13	4	19	17	14	22	17	11	10	13	10	11	16	19	13	19	15	23	12	21	14	24	5
ENSMUSG00000014077	413	556	727	723	591	593	665	646	547	456	692	688	607	574	662	595	612	564	483	622	515	727	501	654	649	343	433	760	612	451	441	349	511	430	283	386	553	565	552	489	571	593	669	700	588	641	489	447	381
ENSMUSG00000014158	0	0	0	0	0	0	0	0	0	0	0	0	4	0	0	0	0	0	0	0	0	0	0	0	0	0	0	0	1	1	0	0	0	1	0	0	0	0	0	0	5	0	4	0	0	0	0	0	0
ENSMUSG00000014164	3	16	1	3	2	1	1	9	12	13	2	2	2	3	3	23	27	5	2	2	3	3	3	1	10	6	15	2	3	12	2	41	23	18	38	5	2	4	1	14	14	0	9	1	0	1	23	8	5
ENSMUSG00000014177	1362	1131	1156	1600	1384	1211	1450	1357	1330	1278	1441	1257	1053	1418	975	1090	1118	1131	1551	1230	1213	1485	1285	1427	1435	1331	1258	1200	1244	1339	1022	1195	1317	1281	975	1297	1634	1509	1315	1398	1331	1478	1790	1492	1458	1609	1533	1210	296
ENSMUSG00000014195	82	76	76	174	118	74	107	83	85	83	110	70	53	150	96	113	54	91	130	79	59	121	114	65	67	89	109	23	78	144	42	133	154	90	137	135	98	130	75	110	106	126	175	145	61	87	95	168	137
ENSMUSG00000014198	1	0	0	0	0	0	0	0	0	0	0	0	0	0	0	0	0	0	0	0	0	0	1	0	4	0	0	1	1	0	1	0	0	0	0	0	0	1	0	0	1	0	3	4	0	0	0	2	1
ENSMUSG00000014226	326	122	19	159	303	204	136	143	189	269	40	113	324	344	279	234	526	196	248	623	339	31	269	363	119	125	307	118	53	165	368	246	242	193	273	932	174	51	282	359	252	200	274	165	36	50	88	249	250
ENSMUSG00000014232	1	37	12	9	17	0	4	14	13	12	33	6	2	8	7	2	4	7	5	8	18	2	1	17	18	25	10	12	13	22	22	21	16	23	18	18	10	14	23	15	11	11	16	18	5	19	25	24	5
ENSMUSG00000014243	73	74	46	52	70	71	74	63	55	43	62	70	82	61	36	60	61	75	74	70	62	66	60	50	116	124	98	139	105	77	108	100	72	60	94	123	71	71	64	69	76	79	114	110	89	61	68	70	15
ENSMUSG00000014245	5	1	0	0	0	4	0	0	0	3	1	2	1	5	0	2	2	2	0	0	1	1	0	1	0	1	0	3	2	1	0	1	1	0	1	1	0	0	0	0	2	0	2	0	0	0	0	1	19
ENSMUSG00000014294	1	14	11	13	3	24	12	1	4	11	20	1	15	46	2	1	18	1	4	10	42	35	26	9	10	22	14	31	12	7	16	40	11	1	15	38	63	21	55	7	4	25	14	12	37	5	25	15	33
ENSMUSG00000014301	19	9	9	21	18	9	33	3	24	30	16	19	24	5	13	18	11	11	18	20	20	20	23	12	16	35	14	24	25	16	11	23	14	2	12	51	28	12	2	18	6	5	19	14	10	29	33	20	3
ENSMUSG00000014303	10	24	10	9	12	31	8	7	7	116	11	12	101	9	14	12	62	11	15	12	23	15	15	11	78	14	14	10	8	10	11	9	9	9	7	29	12	15	10	9	10	9	9	85	9	8	8	11	2
ENSMUSG00000014313	183	112	68	84	145	227	180	142	153	195	221	179	168	167	120	107	104	81	290	217	229	198	139	253	242	223	251	236	243	237	250	223	124	214	312	283	263	190	241	190	134	140	175	179	158	230	169	199	35
ENSMUSG00000014329	301	108	292	365	223	130	245	281	278	294	313	69	274	304	406	389	396	720	633	832	581	790	324	589	243	305	372	155	151	350	137	368	139	412	247	359	492	671	584	683	355	402	493	464	527	707	681	461	36
ENSMUSG00000014349	604	720	795	990	1103	838	718	853	919	882	919	1155	664	636	393	602	481	527	441	718	546	692	808	915	1083	837	737	1327	1313	957	833	768	1064	928	828	757	709	774	665	646	956	710	566	859	636	701	497	414	184
ENSMUSG00000014351	0	0	0	0	0	0	0	0	1	0	0	0	0	0	0	0	2	0	0	0	0	0	0	0	0	1	1	0	0	0	0	0	0	0	0	0	0	0	3	0	0	1	1	0	1	0	1	0	0
ENSMUSG00000014353	913	857	939	863	964	917	914	912	867	805	817	1040	926	855	812	777	769	871	745	899	1036	946	939	949	661	782	640	620	605	767	692	811	724	832	648	744	584	521	556	683	501	672	821	660	889	831	912	741	239
ENSMUSG00000014355	1349	1414	1949	1751	1328	1693	1614	1722	1695	1545	1817	2203	1510	1717	1814	1835	1934	2008	1785	1743	1643	1640	1127	1614	1310	1165	1370	1381	1447	1266	1181	1157	1088	1134	1553	927	1581	1271	1337	1761	1787	1231	1510	1298	1812	1659	1252	1358	609
ENSMUSG00000014361	358	378	526	434	840	547	587	586	710	580	406	478	164	528	479	204	369	197	380	395	413	211	305	118	302	191	269	223	256	526	245	210	257	374	545	457	286	369	412	390	432	366	449	377	530	372	286	589	183
ENSMUSG00000014402	223	195	189	195	180	189	143	159	184	222	224	179	228	264	166	210	170	186	286	201	169	171	234	173	153	191	166	168	110	213	133	191	138	228	218	251	185	150	171	180	189	155	158	132	145	109	152	153	264
ENSMUSG00000014418	329	423	323	334	282	286	402	352	320	387	400	421	334	343	551	322	243	382	281	337	300	289	227	336	295	346	207	353	313	316	310	297	304	256	270	306	281	328	268	285	408	249	350	266	302	275	225	273	212
ENSMUSG00000014426	151	179	264	300	182	294	91	170	104	125	105	72	72	74	151	145	198	214	48	159	143	125	72	124	213	163	219	155	265	128	173	81	149	79	109	49	170	288	108	164	197	88	145	60	170	199	174	136	144
ENSMUSG00000014444	0	0	0	0	0	0	0	0	0	0	0	0	0	0	11	0	0	3	0	1	0	0	1	0	1	1	0	0	0	0	0	0	1	0	0	0	0	0	0	0	3	0	0	5	6	2	0	0	7
ENSMUSG00000014453	0	0	0	0	0	0	15	0	0	0	0	0	0	0	0	0	6	0	0	0	0	0	0	0	0	0	0	0	0	0	0	0	0	0	0	0	0	0	18	0	3	0	0	0	0	0	0	0	0
ENSMUSG00000014470	166	217	214	159	75	196	106	116	161	175	206	130	136	185	231	295	177	208	287	207	171	139	62	174	76	222	148	116	95	81	116	134	96	131	160	105	140	136	133	118	129	84	127	150	118	139	159	152	249
ENSMUSG00000014496	266	351	272	320	348	324	462	316	326	352	389	374	256	230	251	252	322	310	254	328	279	359	471	374	393	356	258	387	352	314	307	341	335	383	311	274	371	353	279	303	332	271	276	319	397	291	384	313	354
ENSMUSG00000014498	7	49	27	57	11	11	7	4	0	23	10	15	3	7	16	1	24	10	9	12	6	45	5	16	42	15	7	17	22	24	2	34	7	17	14	21	4	8	33	10	19	21	49	18	34	4	45	3	48
ENSMUSG00000014503	7019	9564	9652	6905	6815	8719	8080	11037	11225	11515	8947	7312	7423	6333	7103	7324	6187	5354	8985	8435	10417	7571	6329	10248	6523	10391	10733	6668	7645	10891	7833	14034	12604	14478	15986	13614	9087	6143	11096	13782	4517	5869	9108	10765	5304	13372	14461	10824	2547
ENSMUSG00000014504	763	1008	583	522	934	929	962	1069	982	1009	1071	1170	548	544	390	517	500	400	633	798	923	812	754	932	914	1042	996	1413	992	1067	763	1408	1406	1509	998	1315	1044	806	1063	1245	570	568	990	1521	487	1105	1405	1066	106
ENSMUSG00000014529	1	1	1	1	1	1	1	1	1	1	1	1	1	1	1	1	1	1	1	1	1	1	1	1	0	7	5	1	1	1	1	1	4	1	1	1	18	1	1	1	1	1	1	1	1	1	1	1	0
ENSMUSG00000014542	0	0	0	0	0	0	0	0	0	0	0	0	0	0	0	0	0	1	0	0	0	0	0	0	0	0	0	0	0	0	0	0	0	0	0	0	0	0	0	0	0	0	0	0	0	0	0	0	0
ENSMUSG00000014547	0	0	0	1	0	0	0	0	0	0	0	0	0	0	0	0	0	0	0	0	0	0	0	0	0	0	0	1	0	0	0	0	0	1	0	0	0	0	0	0	0	0	0	2	0	0	0	1	45
ENSMUSG00000014550	1240	1393	1018	1395	1230	942	1307	1247	1198	944	1133	1230	1037	734	912	848	1013	746	901	1097	780	1588	1053	1213	995	845	853	808	756	809	896	911	802	859	953	1102	672	897	817	992	966	807	875	652	786	811	927	906	1088
ENSMUSG00000014551	393	258	99	298	371	430	296	413	380	375	393	455	360	322	257	237	361	418	259	339	271	317	350	320	512	335	437	499	317	477	611	358	442	264	405	501	272	350	305	305	382	319	217	351	291	223	303	244	149
ENSMUSG00000014554	202	201	145	226	261	194	300	246	245	229	310	313	172	116	149	156	221	162	143	217	99	163	143	162	281	208	208	382	331	209	258	183	277	230	247	259	137	166	92	152	232	173	244	404	170	168	166	143	10
ENSMUSG00000014592	788	965	1361	783	629	840	709	791	799	932	773	734	547	850	739	736	760	1062	904	646	809	564	673	864	534	859	668	490	674	825	584	935	729	1133	890	745	529	622	692	886	505	485	665	575	574	855	955	659	135
ENSMUSG00000014599	333	389	482	341	492	486	380	669	428	398	455	475	301	515	346	333	315	437	254	259	360	363	367	354	241	267	262	292	254	381	324	418	329	370	301	367	253	275	295	302	216	246	192	249	425	374	333	318	186
ENSMUSG00000014601	3589	5118	4355	5770	4636	4456	4367	3381	5090	5244	4856	4369	4537	5447	5098	4488	3786	3726	3859	6160	5413	5812	5673	6484	3852	3893	2854	7175	5527	4793	5247	4378	7073	5195	4488	6719	5691	5335	4818	5297	5187	6135	5828	7932	3719	6640	4827	4013	333
ENSMUSG00000014602	1	1	0	1	0	0	1	1	1	1	0	16	1	1	0	17	0	6	0	7	0	0	0	0	1	1	1	21	1	0	0	0	0	1	1	1	0	0	0	1	0	8	0	0	1	1	1	2	4
ENSMUSG00000014606	106	163	190	280	195	122	176	135	242	199	143	139	178	167	192	212	166	206	107	273	134	118	190	282	220	148	258	297	235	143	309	214	240	213	124	270	290	203	148	200	240	220	234	236	115	172	262	231	103
ENSMUSG00000014609	2	2	1	2	2	5	1	1	1	1	2	2	2	2	1	1	1	1	1	1	1	1	2	1	2	1	1	2	2	2	2	1	1	1	1	1	2	2	1	1	1	1	1	1	1	1	1	1	7
ENSMUSG00000014633	254	356	219	236	351	245	402	375	315	383	351	243	281	245	245	241	380	230	246	326	334	275	294	471	337	331	304	437	433	297	231	392	442	387	387	537	389	411	340	401	256	320	402	367	211	419	366	283	110
ENSMUSG00000014668	560	1059	1182	1008	1189	804	1046	917	985	1118	764	808	900	1147	1526	1032	1170	1362	822	1134	946	753	827	1177	555	688	580	601	724	592	691	599	596	695	508	567	673	836	492	655	462	563	627	667	787	982	901	1082	771
ENSMUSG00000014686	0	0	0	0	0	0	0	0	0	0	0	0	0	0	0	0	0	1	0	0	0	0	0	0	0	0	0	0	0	0	0	0	0	0	0	0	0	0	0	0	0	0	0	0	0	0	0	0	0
ENSMUSG00000014704	0	0	0	0	0	0	0	0	0	0	0	0	0	0	0	0	0	0	0	0	0	0	0	0	0	0	0	0	0	0	0	0	0	0	0	0	0	0	0	0	0	0	0	0	0	0	0	1	0
ENSMUSG00000014725	2	56	33	2	7	22	0	31	46	8	81	1	2	162	159	73	12	8	39	8	37	24	23	22	21	17	5	1	2	23	1	22	11	1	1	1	11	1	106	9	0	1	11	1	6	15	0	86	11
ENSMUSG00000014747	0	0	2	0	0	0	0	0	0	0	0	0	3	0	0	0	0	0	4	0	0	0	0	0	0	0	0	0	0	0	0	0	0	0	0	0	1	0	0	0	0	0	0	0	0	0	0	0	0
ENSMUSG00000014748	179	304	377	283	255	223	130	342	254	188	203	240	179	153	205	127	201	306	291	199	146	159	99	214	375	289	248	249	307	227	302	146	138	311	83	391	206	212	78	155	254	151	148	206	234	184	203	184	153
ENSMUSG00000014763	19	15	8	9	13	8	9	18	18	20	13	11	10	9	11	27	12	17	12	10	11	4	24	12	14	20	14	18	3	8	14	9	14	20	12	16	18	11	23	19	20	9	8	12	15	11	10	22	7
ENSMUSG00000014767	465	343	290	438	401	379	355	419	342	456	393	573	407	419	377	393	391	300	321	479	342	268	441	319	264	300	254	395	401	255	382	332	310	323	228	371	478	454	346	413	572	485	354	358	446	318	328	247	943
ENSMUSG00000014769	334	628	498	73	541	386	262	370	398	328	579	284	304	1002	503	1030	244	208	814	261	359	6	357	425	452	290	182	155	451	192	39	353	385	449	303	274	166	730	582	231	258	258	222	321	105	203	140	346	333
ENSMUSG00000014773	1	1	0	1	0	2	1	0	0	0	0	0	1	1	0	0	0	3	0	7	2	0	0	0	1	1	1	1	1	0	1	0	0	0	0	0	5	1	0	0	0	0	0	0	0	0	0	0	0
ENSMUSG00000014776	0	0	0	0	0	0	0	0	1	0	0	0	0	0	0	0	0	0	0	0	0	0	0	0	0	6	0	0	0	0	2	0	0	0	0	0	0	0	0	0	0	0	0	0	1	0	0	0	0
ENSMUSG00000014778	7	35	4	9	17	60	68	24	22	8	25	5	8	11	5	30	21	33	3	17	9	66	19	48	70	22	7	23	6	12	161	36	11	3	30	42	3	3	3	2	27	4	10	22	2	43	46	80	0
ENSMUSG00000014782	30	11	24	23	18	16	17	18	15	4	3	22	21	10	3	19	11	1	37	23	5	29	25	24	10	8	16	13	11	5	2	13	5	0	3	9	6	9	10	4	5	9	4	8	5	11	3	0	0
ENSMUSG00000014786	1	21	25	47	1	1	18	1	1	1	28	12	1	2	2	1	4	2	1	1	1	34	7	1	1	21	6	25	3	1	1	1	1	1	5	1	35	1	1	1	0	22	15	3	1	5	1	1	2
ENSMUSG00000014791	0	6	0	0	0	0	0	0	2	0	0	0	0	0	0	0	0	0	0	3	0	0	0	0	0	0	0	0	0	0	0	0	0	0	0	0	1	0	7	11	0	0	4	0	0	0	0	0	0
ENSMUSG00000014813	62	1	41	3	19	18	27	6	30	117	92	41	128	0	17	9	11	25	0	19	49	4	2	3	17	31	336	20	2	111	9	0	81	22	44	45	1	40	17	13	4	2	29	36	115	1	41	19	0
ENSMUSG00000014837	1	0	7	1	0	0	0	0	0	5	0	0	1	1	0	1	2	0	0	0	2	0	0	15	2	0	0	8	5	0	0	0	0	0	0	12	0	0	0	0	3	0	0	0	0	0	3	0	0
ENSMUSG00000014846	28	43	10	23	20	37	46	53	55	50	26	79	39	16	47	52	56	20	61	50	30	20	100	59	29	34	63	22	36	61	38	37	58	28	27	8	120	99	104	48	109	28	66	68	93	105	46	91	24
ENSMUSG00000014850	519	837	568	616	355	457	386	497	554	612	520	571	465	702	740	808	664	817	1060	588	575	675	566	529	502	575	508	392	381	635	453	615	436	419	563	396	429	380	503	572	439	517	308	323	430	534	521	414	218
ENSMUSG00000014852	0	0	0	0	0	0	0	0	0	0	0	0	0	0	0	0	0	0	0	0	0	0	0	0	0	0	3	0	0	2	0	0	0	0	0	0	0	0	0	0	0	0	0	1	0	0	0	1	0
ENSMUSG00000014856	4	2	1	4	2	13	2	2	2	2	15	3	7	42	2	22	2	1	27	2	1	2	3	20	2	1	1	3	3	3	3	2	2	2	23	2	3	4	2	1	12	1	10	2	6	2	1	2	0
ENSMUSG00000014859	2827	2733	2767	3176	2955	2433	3207	2670	2749	3175	2799	2291	2446	2576	3551	3024	2521	3522	2242	3061	2375	2581	2561	3228	3828	3590	3435	3275	3596	2785	3018	3289	3579	2882	2581	2770	3668	3985	2682	3198	3422	2978	3129	3822	2854	3409	2636	2802	1305
ENSMUSG00000014867	4897	7159	6355	5938	7848	6655	6389	6141	7298	7016	5746	4616	6023	6900	6848	5831	6176	6994	4824	6711	6582	5735	7459	7217	6109	5280	5015	6375	6394	5506	6133	6187	7064	6186	4612	6790	6291	6943	7950	6563	5712	5282	6505	6804	6444	7210	6006	6481	4545
ENSMUSG00000014873	41	2	22	3	60	35	2	13	44	3	3	17	49	3	108	4	4	3	4	3	3	4	4	3	2	1	1	29	2	3	3	13	3	2	2	2	3	5	3	2	5	15	2	2	7	33	2	7	79
ENSMUSG00000014905	132	312	163	155	149	65	108	101	158	223	61	104	268	237	272	411	418	182	501	269	330	211	514	245	114	179	43	81	129	232	265	202	175	43	114	104	197	100	106	201	548	283	344	163	232	228	160	212	2090
ENSMUSG00000014907	47	36	47	93	50	45	68	69	69	67	74	51	45	57	33	43	48	51	62	45	39	46	76	67	45	60	52	24	39	64	38	70	53	54	63	40	52	36	28	23	40	37	35	38	36	56	104	37	47
ENSMUSG00000014932	24	20	44	16	15	38	30	27	25	27	29	13	37	27	30	52	31	44	69	18	21	16	17	16	21	35	22	18	16	21	12	27	13	19	26	21	15	17	14	20	15	24	27	17	19	17	20	16	53
ENSMUSG00000014956	753	783	546	918	549	512	542	666	512	490	563	672	523	511	586	745	565	823	781	661	495	494	452	473	626	674	693	505	705	812	706	774	524	910	724	552	415	390	374	462	486	519	541	434	599	496	522	608	850
ENSMUSG00000014959	1237	1400	1319	1513	1903	1662	1963	1537	1554	1397	1453	1560	897	1248	968	935	1102	1278	798	967	1001	1013	811	1522	1739	1724	1672	2338	2140	1654	1466	1767	2087	1882	1615	1830	1596	1705	1466	1359	1603	1860	1306	2013	1572	1411	1420	1407	514
ENSMUSG00000014980	29	101	47	89	176	145	36	39	47	49	86	43	56	47	4	8	51	83	41	108	4	37	94	47	53	83	121	15	51	45	18	81	60	120	32	74	79	110	92	95	112	53	58	146	117	104	70	81	1
ENSMUSG00000015001	0	0	0	0	0	0	0	0	0	0	0	0	0	0	0	0	0	0	0	0	0	0	0	0	0	0	0	0	0	0	0	0	0	0	0	0	0	0	0	0	0	0	0	0	0	0	0	0	0
ENSMUSG00000015002	567	527	738	621	473	565	494	527	547	534	572	497	473	507	462	639	582	504	562	522	519	454	411	548	324	452	422	370	405	502	415	354	364	344	447	327	399	339	336	469	264	506	461	431	527	524	475	326	210
ENSMUSG00000015013	2	1	0	1	3	0	0	0	0	0	0	0	0	0	0	0	0	0	3	2	1	0	0	0	1	0	0	0	0	0	0	0	2	3	0	0	0	2	0	1	0	0	0	0	1	0	0	0	2
ENSMUSG00000015016	0	0	0	0	0	0	0	0	0	0	0	0	0	0	0	0	0	0	0	0	0	0	0	0	0	2	0	0	0	0	0	0	0	0	0	0	0	0	0	0	0	0	0	0	0	1	2	0	0
ENSMUSG00000015023	55	44	61	45	31	36	39	32	39	32	41	41	52	53	54	61	68	43	82	34	26	46	20	29	58	68	62	72	70	79	47	53	48	58	84	46	52	56	39	58	64	60	52	48	59	35	49	31	117
ENSMUSG00000015027	26	22	38	144	25	18	15	17	15	24	209	35	33	648	52	116	41	279	1454	78	20	31	52	510	130	125	9	421	11	30	22	22	21	20	18	23	23	25	114	96	235	144	286	14	78	20	20	32	94
ENSMUSG00000015053	3	70	53	20	5	0	15	44	5	14	12	16	16	8	28	51	64	0	47	34	61	1	48	10	13	2	12	1	4	22	29	0	3	8	17	3	9	4	83	16	7	49	2	2	40	2	9	37	163
ENSMUSG00000015083	13	2	1	2	2	19	24	1	1	2	2	56	2	17	2	2	2	1	1	4	22	14	2	16	1	1	27	37	1	10	4	1	1	19	13	94	64	7	2	23	19	14	42	96	115	40	4	19	0
ENSMUSG00000015085	8	10	8	11	2	9	21	6	7	3	3	6	15	14	18	24	50	48	17	21	29	29	61	11	4	6	6	11	5	4	2	6	2	27	3	3	13	17	10	3	4	23	12	2	3	6	11	3	12
ENSMUSG00000015087	227	136	367	140	118	190	82	135	136	189	129	102	73	101	126	175	64	269	170	144	153	34	177	110	135	197	168	102	165	162	271	229	307	383	239	164	131	19	206	158	96	75	115	135	104	149	287	141	95
ENSMUSG00000015090	0	2	3	0	0	1	0	3	0	0	0	0	12	8	6	9	6	7	13	5	14	11	21	16	0	0	0	4	1	0	5	1	1	6	0	0	14	4	13	7	12	23	9	23	15	7	6	9	0
ENSMUSG00000015092	12	12	11	14	10	7	10	22	11	11	11	12	15	18	58	11	81	20	42	41	28	10	9	10	35	9	9	30	57	12	10	21	9	11	80	201	10	8	10	10	7	15	8	8	9	24	12	22	37
ENSMUSG00000015093	0	1	0	0	0	0	1	1	1	0	0	0	0	0	0	0	0	0	0	0	0	1	0	0	1	1	1	0	1	0	0	0	0	1	1	25	0	2	0	1	1	1	1	1	1	1	1	0	0
ENSMUSG00000015094	32	1	25	11	12	27	28	6	102	16	17	12	4	8	0	26	34	3	1	3	2	0	0	10	67	22	11	16	51	26	7	8	19	35	36	20	22	10	32	1	49	1	7	28	22	1	22	19	3
ENSMUSG00000015095	72	265	369	168	394	271	168	159	162	89	85	171	453	357	400	322	357	285	176	411	227	307	251	455	299	217	309	468	245	239	411	281	180	277	217	442	228	603	267	292	330	297	177	381	519	349	430	217	109
ENSMUSG00000015112	193	177	373	176	513	231	162	209	305	231	289	321	205	270	304	281	225	214	170	192	155	295	237	156	277	210	312	162	228	128	295	211	210	276	150	322	233	147	277	333	310	87	210	181	190	331	235	159	248
ENSMUSG00000015120	145	149	126	172	168	173	229	163	185	238	238	257	146	161	180	161	167	144	139	180	182	155	218	210	189	171	229	233	219	118	179	166	178	178	147	155	185	191	195	173	203	141	142	177	158	201	132	174	85
ENSMUSG00000015126	6	54	5	54	5	40	31	36	3	38	5	6	6	8	8	13	6	5	46	5	13	33	6	4	3	12	2	31	3	69	5	20	4	4	12	4	5	6	5	26	32	5	29	8	45	29	4	5	29
ENSMUSG00000015127	14	33	57	16	22	24	13	15	49	13	12	13	18	20	96	22	10	9	9	10	73	148	173	50	65	14	15	12	13	13	23	12	34	142	11	13	127	45	103	27	20	11	47	58	42	48	166	58	61
ENSMUSG00000015133	2	1	1	2	1	0	10	7	0	1	1	1	2	2	4	1	1	1	2	29	2	1	1	1	0	1	2	1	1	1	1	1	1	4	7	1	1	1	1	0	0	1	13	0	0	1	2	1	1
ENSMUSG00000015134	0	0	0	0	0	0	0	0	0	0	0	0	7	0	0	0	1	0	0	0	0	0	0	0	0	0	0	1	2	0	0	0	1	3	0	4	0	0	0	0	0	0	6	0	0	0	6	0	14
ENSMUSG00000015143	42	23	31	12	25	12	56	38	39	29	29	17	30	16	18	19	30	20	26	43	42	45	30	50	35	41	39	11	57	47	53	44	55	53	45	78	47	65	35	31	30	58	50	32	21	41	63	41	5
ENSMUSG00000015149	1	32	1	17	1	0	14	1	8	0	0	12	2	2	27	0	19	35	70	9	0	41	26	3	0	13	0	0	10	1	0	18	0	0	0	0	4	9	22	12	16	3	13	25	19	1	16	5	55
ENSMUSG00000015165	65	77	44	89	73	60	155	103	92	95	136	102	65	34	22	46	82	44	34	95	84	92	106	112	148	104	93	83	147	156	180	136	131	169	130	169	96	153	105	109	69	92	86	194	116	143	58	131	20
ENSMUSG00000015176	1155	1062	1227	953	993	779	1121	1120	1208	941	1135	1556	584	1096	1093	1081	879	933	773	1039	1460	1096	848	1357	1078	1207	1437	1110	1110	1233	1269	1035	1287	1311	1321	1391	1442	1110	2089	2018	1074	1264	1684	1098	1247	2118	2008	1224	1151
ENSMUSG00000015189	0	9	23	2	0	6	6	0	5	5	9	0	4	20	13	4	2	2	1	2	5	25	1	4	4	1	0	2	16	3	0	3	3	4	5	0	26	5	4	0	1	0	19	5	12	7	5	1	34
ENSMUSG00000015202	108	262	209	164	189	250	184	165	247	170	133	123	112	311	213	168	123	169	95	241	221	232	322	221	289	230	224	201	193	263	257	192	170	286	209	205	346	297	199	279	144	230	249	307	227	224	229	228	94
ENSMUSG00000015214	3	4	29	4	2	1	3	3	4	3	27	2	4	23	3	2	110	2	2	10	2	12	28	2	2	3	12	32	2	17	2	3	38	39	3	3	2	13	3	7	18	25	14	2	24	57	4	2	0
ENSMUSG00000015217	113	150	66	126	131	70	154	129	105	159	141	122	129	157	197	114	155	137	110	126	127	161	257	157	151	142	133	125	155	132	128	159	114	144	127	123	186	202	146	102	214	145	153	179	155	160	141	232	167
ENSMUSG00000015222	16	38	31	25	30	33	32	16	28	32	23	32	26	36	42	39	60	62	59	43	33	36	24	24	23	27	29	35	42	21	28	15	25	33	76	47	26	24	31	33	32	29	24	34	57	58	36	41	83
ENSMUSG00000015224	0	0	0	0	0	0	0	0	0	0	0	0	0	0	0	0	1	0	0	0	1	0	0	0	0	0	0	0	1	3	0	0	0	0	0	0	0	0	0	0	0	0	0	0	0	0	0	0	0
ENSMUSG00000015243	0	0	0	0	0	0	0	0	0	0	0	0	0	0	0	0	2	1	0	0	0	0	0	0	0	0	0	0	1	0	0	0	0	0	0	0	0	0	0	0	0	0	0	0	0	0	0	1	0
ENSMUSG00000015247	6	0	0	0	0	0	0	0	0	0	0	0	0	0	0	0	0	0	0	0	0	0	1	0	0	0	4	0	0	0	0	0	0	0	0	0	0	12	0	12	9	0	0	0	0	0	0	0	0
ENSMUSG00000015289	7	10	8	9	5	5	24	1	3	4	9	5	10	4	4	18	14	5	14	1	11	8	4	9	20	7	19	7	9	10	19	0	9	0	6	5	9	12	14	5	18	13	10	6	1	10	13	24	23
ENSMUSG00000015290	101	6	17	7	11	7	3	4	4	23	8	2	19	9	1	1	6	2	24	2	11	17	20	14	36	47	70	112	13	3	2	24	2	3	15	49	23	24	30	43	12	28	8	30	2	4	3	5	5
ENSMUSG00000015291	30	18	14	44	14	24	15	4	31	24	23	36	80	2	56	121	49	46	24	38	28	61	9	15	45	16	20	41	46	53	22	19	6	22	36	2	25	10	33	39	15	33	43	14	43	52	48	18	18
ENSMUSG00000015305	81	23	38	29	41	39	62	72	43	80	67	60	43	72	26	38	62	59	62	67	57	31	69	52	50	65	51	45	29	67	42	111	54	68	93	23	18	62	54	76	27	51	47	51	42	50	102	60	110
ENSMUSG00000015312	1	1	12	0	4	1	4	8	31	19	7	2	20	28	43	28	6	37	24	47	16	13	44	77	1	2	2	0	1	1	7	19	17	19	0	3	36	5	32	11	0	10	12	1	6	2	39	30	135
ENSMUSG00000015314	0	0	0	0	0	3	0	0	0	0	0	0	0	0	0	0	1	2	0	0	0	0	0	0	0	0	0	0	0	0	0	1	0	0	0	0	0	0	0	0	0	0	0	0	0	0	0	2	0
ENSMUSG00000015316	5	0	12	4	9	19	10	2	15	42	14	6	19	18	9	8	35	23	0	17	14	22	5	18	5	13	3	3	13	0	15	23	12	10	17	0	27	0	30	15	14	2	5	8	10	4	40	61	30
ENSMUSG00000015335	37	42	20	8	34	79	41	46	11	53	79	32	74	50	35	71	7	27	48	16	37	31	58	38	84	95	3	4	4	31	71	11	45	9	25	24	16	12	62	41	2	52	11	34	1	21	7	14	16
ENSMUSG00000015337	1	2	2	2	11	2	2	14	2	2	7	5	2	9	5	5	2	5	8	7	5	16	3	4	1	2	2	6	1	2	1	2	2	2	2	2	4	1	2	2	3	2	2	1	2	5	2	2	6
ENSMUSG00000015340	5	56	108	52	125	2	44	64	112	10	9	16	18	5	6	11	17	8	4	58	40	5	5	14	62	43	1	83	120	398	4	30	68	24	22	2	32	7	3	2	6	9	1	5	1	2	6	4	1
ENSMUSG00000015341	360	291	427	290	474	473	261	337	354	378	395	325	577	504	422	394	385	511	306	534	416	461	508	443	267	210	289	380	216	285	304	221	309	392	296	325	308	331	358	416	273	270	301	368	269	483	252	321	203
ENSMUSG00000015342	96	94	40	65	53	67	69	39	49	51	73	77	17	58	49	43	79	127	54	25	50	70	66	53	27	37	40	40	27	33	19	43	35	32	62	38	20	10	37	43	13	30	21	15	39	29	37	23	54
ENSMUSG00000015354	20	32	20	30	38	15	34	17	31	18	21	21	20	28	45	41	51	28	14	36	24	37	16	24	31	16	20	34	23	31	14	20	44	8	15	39	31	56	33	34	26	15	22	51	20	28	23	14	17
ENSMUSG00000015355	0	2	3	0	0	2	1	3	1	1	4	0	0	5	4	0	0	0	3	3	0	2	0	0	0	2	1	0	0	4	0	2	1	0	0	0	2	0	0	0	1	1	1	3	2	3	1	5	0
ENSMUSG00000015357	144	147	229	188	118	97	196	198	98	178	214	158	155	167	160	374	136	190	217	113	182	214	223	154	154	148	123	113	103	106	90	101	94	64	114	131	173	151	113	103	67	78	145	190	151	72	157	49	951
ENSMUSG00000015363	0	0	0	2	0	0	0	3	0	0	0	0	0	0	0	0	0	4	0	0	0	0	0	0	0	0	0	0	0	2	0	0	0	0	0	0	0	3	0	0	0	0	0	0	0	0	0	0	0
ENSMUSG00000015365	346	229	192	205	80	151	107	72	144	58	158	188	134	76	140	133	156	101	84	76	146	88	176	138	235	99	71	94	186	126	13	111	94	87	156	143	74	147	106	141	94	135	118	87	219	52	76	152	7
ENSMUSG00000015377	0	0	0	9	0	1	0	3	0	0	0	0	0	0	0	0	0	0	0	0	0	0	0	16	0	0	0	0	0	0	0	0	7	0	0	0	0	18	0	0	15	0	0	0	0	3	0	0	0
ENSMUSG00000015401	52	36	17	64	28	17	17	68	47	31	33	33	11	3	16	20	17	5	16	10	30	16	27	23	41	39	31	22	64	25	23	27	35	8	21	52	7	18	32	6	7	36	15	12	4	20	22	8	4
ENSMUSG00000015405	0	0	0	8	0	2	0	0	4	0	0	0	0	0	17	0	0	1	0	0	0	0	0	8	4	4	0	0	17	0	0	4	7	0	0	0	0	7	0	0	0	0	6	0	0	0	0	0	0
ENSMUSG00000015437	0	0	0	0	0	0	0	0	0	0	0	0	2	0	0	0	0	0	14	0	0	0	0	0	0	0	0	0	0	0	0	0	0	0	0	0	0	0	1	0	0	0	0	0	0	0	1	0	0
ENSMUSG00000015443	0	0	0	0	0	0	0	0	0	0	0	0	0	0	0	0	1	0	0	0	0	0	0	0	0	0	0	0	0	0	0	0	0	0	0	0	0	0	0	0	1	0	0	0	0	0	0	0	0
ENSMUSG00000015451	0	0	0	0	0	0	0	0	0	0	0	0	0	0	0	0	2	1	0	0	0	0	0	0	0	0	0	0	0	0	0	0	0	0	0	0	0	0	0	0	0	0	0	0	0	0	0	0	0
ENSMUSG00000015452	0	0	0	0	0	0	0	0	0	0	0	0	0	0	0	0	0	1	0	0	0	0	0	0	0	0	0	0	0	0	0	0	0	0	0	0	0	0	0	0	0	0	0	0	0	0	0	0	0
ENSMUSG00000015461	116	176	113	185	205	149	191	170	173	202	139	201	93	147	108	117	85	140	59	165	146	102	195	259	178	149	145	164	146	161	249	199	325	206	161	263	210	202	139	261	118	121	260	269	147	226	230	195	30
ENSMUSG00000015467	1	1	1	1	1	1	1	1	1	1	1	1	1	1	1	1	1	1	1	1	1	1	1	1	1	1	1	1	1	1	1	1	1	1	1	1	1	1	1	1	1	1	1	1	1	1	1	1	0
ENSMUSG00000015468	11	0	0	5	0	0	0	0	0	0	0	0	0	0	0	0	8	1	7	0	0	4	0	0	0	0	0	0	0	0	0	0	0	0	0	0	0	0	0	0	0	10	0	0	0	0	0	1	0
ENSMUSG00000015474	118	147	96	158	304	129	266	193	195	278	255	181	142	90	121	135	165	130	93	223	87	102	110	199	266	186	158	318	375	259	244	272	294	204	253	228	176	193	130	145	267	183	189	261	177	126	106	101	51
ENSMUSG00000015476	0	0	0	0	0	0	0	0	0	0	0	0	0	0	0	0	1	0	0	0	0	0	0	0	0	0	0	0	0	0	0	0	0	0	0	0	0	0	0	0	0	0	0	0	0	0	0	0	0
ENSMUSG00000015478	7	1	9	4	2	6	5	0	7	8	8	7	16	23	29	12	18	14	10	7	5	6	7	7	7	8	9	11	3	14	4	5	10	17	1	14	3	6	2	6	8	12	5	3	15	3	4	5	24
ENSMUSG00000015484	1	1	0	1	0	4	0	0	0	0	0	0	1	1	0	0	1	6	0	0	0	0	0	0	0	0	0	1	1	1	1	0	0	19	0	0	13	1	0	0	0	10	11	0	0	0	4	3	0
ENSMUSG00000015488	44	79	127	96	99	79	26	60	50	46	35	93	113	120	89	69	83	154	61	77	96	91	57	143	78	97	61	62	125	111	140	80	89	84	78	86	42	83	78	82	86	67	51	70	57	41	58	55	60
ENSMUSG00000015501	4	1	2	1	3	1	2	0	3	4	2	0	0	0	0	0	0	1	0	2	0	0	2	1	3	2	0	1	4	8	1	2	0	2	4	0	0	0	0	0	0	1	0	0	2	1	1	0	6
ENSMUSG00000015522	251	283	337	382	364	209	316	282	196	235	158	213	213	367	311	317	320	325	282	281	221	181	378	355	327	255	206	297	345	240	255	199	266	158	152	200	429	394	332	239	429	365	420	339	370	320	208	327	350
ENSMUSG00000015536	15	111	108	34	104	110	16	39	86	94	79	47	198	23	159	116	140	51	117	43	123	43	41	40	40	28	93	104	110	141	85	29	81	107	75	105	87	16	44	70	38	56	60	87	85	104	153	32	34
ENSMUSG00000015542	1	0	0	1	0	0	0	0	0	1	0	30	1	1	1	1	2	0	0	13	0	0	1	8	6	3	1	0	12	18	1	11	2	0	1	0	0	1	2	7	7	6	12	15	3	0	0	0	0
ENSMUSG00000015568	234	334	303	413	511	507	414	521	441	342	537	409	240	268	224	244	348	229	265	378	268	317	243	431	471	526	553	332	480	581	407	567	489	608	693	1017	347	464	492	487	264	325	386	382	523	631	727	681	106
ENSMUSG00000015575	984	524	547	627	900	861	833	860	944	1039	869	1015	1206	534	884	739	848	527	1069	1196	1198	803	813	1287	855	840	782	1129	1018	661	812	1033	748	730	860	852	1482	898	1750	1382	789	969	1064	1568	715	1270	1623	1714	776
ENSMUSG00000015579	0	0	0	0	0	0	0	0	0	0	0	0	0	0	0	0	5	0	0	0	0	0	0	0	0	0	0	0	0	0	0	0	0	0	0	0	0	0	0	0	0	0	0	0	0	0	0	0	0
ENSMUSG00000015597	667	801	947	973	886	851	954	1046	935	972	1021	761	862	754	795	884	950	895	1041	991	884	1042	627	988	857	945	674	759	850	877	756	860	658	913	955	739	691	675	949	848	844	794	820	816	719	839	1047	748	286
ENSMUSG00000015599	19	6	10	33	38	6	40	29	69	7	9	22	19	13	123	37	51	77	24	65	6	33	85	46	38	10	65	6	29	10	8	7	46	20	37	7	17	10	7	77	8	3	19	58	18	61	5	169	14
ENSMUSG00000015605	155	198	115	155	231	125	199	89	115	114	235	137	290	194	162	112	171	278	221	212	189	203	149	115	102	189	134	180	112	114	168	211	165	159	171	141	151	216	250	140	265	217	265	262	249	210	216	203	654
ENSMUSG00000015619	46	60	57	44	100	121	95	113	67	48	52	118	106	54	108	64	53	77	73	131	87	77	91	98	94	99	74	118	140	109	91	62	197	143	123	136	117	128	155	154	185	95	147	210	172	201	152	160	45
ENSMUSG00000015647	247	152	77	155	125	186	94	83	36	20	58	139	230	211	201	146	101	156	254	47	269	230	79	317	230	111	144	266	165	141	121	113	132	65	241	277	232	265	137	227	209	290	159	239	183	155	45	94	60
ENSMUSG00000015652	4	3	3	165	3	11	32	39	2	49	7	92	4	5	4	3	3	23	48	50	6	3	3	60	20	1	19	12	115	8	3	27	90	44	7	2	68	3	2	2	12	4	29	4	21	33	2	3	0
ENSMUSG00000015653	1420	2128	1777	1762	1868	1868	1745	1962	1960	1866	2080	2004	1655	1513	1468	1772	1853	1989	1967	1931	1584	1782	1049	1995	1725	1545	1419	1711	1542	1610	1607	2055	1949	1851	1703	1774	1468	1125	1394	1659	1497	1464	1801	1521	1703	1724	1708	1226	223
ENSMUSG00000015656	26	21	14	14	26	17	9	11	13	13	14	23	20	18	11	13	13	10	22	12	18	13	18	9	13	15	5	20	21	16	10	16	12	20	17	27	15	13	23	13	36	29	16	8	23	10	13	17	23
ENSMUSG00000015659	82	4	6	0	24	19	4	19	8	6	12	23	0	23	15	7	19	28	1	0	5	0	0	6	23	12	12	26	7	1	3	16	22	7	11	7	12	6	16	33	5	13	14	9	30	13	17	3	8
ENSMUSG00000015665	1	3	1	1	1	1	0	0	0	1	1	1	1	1	1	1	26	14	1	1	4	1	1	2	17	0	0	1	2	1	1	2	1	0	0	0	1	1	1	0	0	0	0	1	21	0	0	1	0
ENSMUSG00000015668	112	230	96	142	204	88	100	185	120	167	181	77	47	268	77	53	104	119	126	72	132	194	108	154	372	248	217	229	284	414	262	174	148	151	200	205	248	166	190	148	162	239	210	63	193	112	157	164	319
ENSMUSG00000015671	1288	903	728	1257	1203	1212	1225	1263	1354	1439	1802	2061	1506	1246	1181	1132	1217	963	1217	1799	1507	1644	1696	1417	1470	1400	1440	1908	1691	1465	1267	1195	1532	1344	954	1435	2247	1752	1568	1598	1714	1458	1768	2023	1598	1954	1317	1711	115
ENSMUSG00000015672	159	116	88	125	141	140	141	130	182	198	189	198	142	73	119	125	121	57	162	153	137	104	88	137	189	163	221	154	139	168	178	180	190	222	205	189	163	126	128	172	73	162	138	179	84	168	218	130	24
ENSMUSG00000015697	303	244	271	280	197	213	197	194	235	255	192	235	281	434	401	445	391	312	370	291	257	191	283	206	179	178	174	201	215	151	302	217	198	152	234	151	253	204	105	180	340	338	237	146	282	151	217	178	435
ENSMUSG00000015702	0	8	0	0	0	8	0	0	0	0	7	0	0	0	0	0	0	0	0	0	0	9	0	0	0	0	0	0	25	0	0	4	0	0	0	10	0	0	2	0	0	0	0	4	0	0	0	1	0
ENSMUSG00000015709	0	0	0	0	0	3	0	0	0	0	3	0	0	0	0	0	1	1	1	0	0	0	0	0	0	0	0	0	0	0	0	0	0	0	0	0	0	0	9	2	0	0	0	0	0	4	0	0	0
ENSMUSG00000015711	1254	991	1184	863	840	889	810	887	1032	839	939	1274	1451	1237	1269	1238	1214	1353	1180	1228	1190	1097	724	1067	779	802	701	922	671	726	770	895	667	645	774	701	715	874	987	1029	1337	964	1053	985	1159	770	914	923	614
ENSMUSG00000015714	1630	2667	3075	1850	2189	2072	1842	1871	1689	2321	1957	3181	1608	1994	1739	2247	1995	1572	1566	2591	1820	1344	1119	1446	1013	742	645	1448	1120	1123	1521	1852	1426	1440	1137	1403	601	820	886	1170	939	864	1255	1050	915	906	719	415	96
ENSMUSG00000015721	1761	1733	1875	1496	1123	1301	1278	1685	1579	1122	1502	1117	3548	3134	3676	2607	2375	4062	4955	2429	3045	4403	3498	2415	1502	1395	1516	985	1304	1148	1345	1260	1085	1161	1233	932	2354	1832	2057	1539	2202	2354	2243	1697	2186	2031	1829	2700	1227
ENSMUSG00000015733	571	551	704	532	356	567	516	616	566	588	673	810	628	627	524	670	824	695	757	439	507	636	528	496	379	439	373	369	409	372	409	454	454	417	411	432	377	268	329	378	328	346	376	288	440	437	497	404	625
ENSMUSG00000015745	2	1	1	0	0	1	0	0	0	2	0	1	1	0	0	0	0	1	0	4	0	0	0	0	0	0	0	0	1	0	0	0	2	0	0	0	0	0	0	0	0	0	0	0	1	0	2	0	15
ENSMUSG00000015747	22	0	18	13	14	39	14	18	9	14	4	27	2	23	32	0	74	26	5	6	5	37	13	41	9	4	4	5	3	0	0	5	2	0	5	14	20	1	19	0	8	25	0	13	23	20	9	24	4
ENSMUSG00000015748	16	36	11	78	46	71	37	36	38	35	54	61	76	35	29	25	40	51	44	38	51	24	55	23	47	48	59	41	17	45	58	45	40	53	38	46	44	46	37	27	37	58	44	39	18	46	27	20	40
ENSMUSG00000015749	600	584	487	710	705	565	821	629	606	609	907	1160	311	304	442	331	409	278	289	466	351	535	301	363	718	543	509	645	899	617	595	529	682	710	532	539	287	383	254	303	316	231	299	248	417	365	344	209	268
ENSMUSG00000015750	43	10	29	11	31	21	41	55	41	38	23	21	25	30	10	26	31	33	12	61	25	62	37	37	25	30	24	50	62	61	12	41	45	31	47	61	37	57	33	45	41	39	36	91	28	65	47	46	3
ENSMUSG00000015755	1271	1813	1631	1434	1614	1749	1627	1757	1116	1690	1743	2427	1408	1282	1254	1575	1312	1414	1077	1303	1221	1298	1002	1236	1299	1400	1059	1502	1560	1488	1241	1529	1116	1241	1287	1081	962	952	824	1079	990	976	1144	950	1447	1086	1254	992	1230
ENSMUSG00000015757	526	355	232	322	314	349	389	421	460	337	366	383	273	245	212	229	225	242	313	306	408	387	193	295	412	408	508	380	369	505	383	451	338	445	533	529	290	298	391	330	282	370	388	409	353	546	436	394	92
ENSMUSG00000015759	210	288	204	204	104	224	98	120	136	139	109	150	171	230	124	218	217	190	260	167	158	194	198	187	154	157	143	125	133	218	180	144	119	98	129	124	98	96	50	116	199	166	130	71	209	121	193	134	426
ENSMUSG00000015766	384	321	339	291	409	363	383	366	364	326	348	371	287	209	221	251	244	310	250	215	231	326	239	306	317	301	268	349	274	335	254	193	270	280	286	241	216	262	204	227	148	119	179	133	222	174	241	107	224
ENSMUSG00000015776	762	1052	845	1227	924	722	993	676	765	870	667	674	487	564	597	621	577	885	404	622	399	416	562	692	1073	896	899	1033	1368	671	1092	1024	1147	727	682	835	705	901	483	552	758	708	621	1056	655	564	473	571	152
ENSMUSG00000015787	5	6	7	5	6	19	6	6	6	6	6	6	6	6	7	7	6	6	8	6	7	7	6	6	5	6	6	5	5	6	5	6	6	6	6	6	6	5	6	7	6	15	7	6	6	6	7	14	0
ENSMUSG00000015790	142	149	141	143	60	117	85	143	56	85	202	121	60	251	96	73	147	110	157	114	145	95	160	85	148	76	80	66	98	138	231	132	96	101	67	113	58	54	115	106	100	96	172	95	93	197	48	7	30
ENSMUSG00000015804	1494	1787	1808	1724	998	1029	1201	1143	1113	1408	1499	1309	1094	960	1045	882	954	1306	1812	1193	1489	351	392	548	1532	1436	1857	1686	1277	1551	1174	1468	1390	1602	1217	2293	970	836	1334	1388	1197	916	1276	1205	373	589	621	728	1885
ENSMUSG00000015806	129	204	242	212	198	235	200	166	165	153	236	222	230	248	219	187	167	303	303	196	283	158	202	256	248	355	242	329	302	282	229	303	225	242	255	284	272	137	280	205	188	135	146	246	185	179	220	230	294
ENSMUSG00000015812	36	37	42	46	74	50	76	61	61	58	97	79	50	27	31	49	28	32	36	46	45	25	47	58	75	111	104	122	110	44	115	97	86	121	84	71	98	97	61	74	33	69	80	209	41	79	58	116	42
ENSMUSG00000015829	131	204	69	297	289	40	83	105	37	92	77	60	82	23	131	119	37	207	115	107	87	122	187	39	23	60	19	122	42	107	13	70	91	28	76	128	4	17	56	19	48	76	88	56	50	82	91	95	86
ENSMUSG00000015837	86	118	48	188	118	64	171	108	132	95	56	80	61	115	123	77	100	113	159	40	65	139	232	117	200	123	166	146	183	60	123	122	104	106	96	81	216	142	97	31	138	146	77	215	155	123	141	213	70
ENSMUSG00000015839	431	482	526	425	481	409	281	442	226	328	252	487	347	231	220	99	74	335	231	234	388	352	38	297	370	278	262	351	236	382	238	414	330	326	431	223	165	291	181	343	363	133	115	79	114	175	150	493	285
ENSMUSG00000015843	0	0	0	0	0	1	0	0	0	0	0	0	0	0	0	0	0	0	0	0	0	0	0	0	0	0	2	0	0	0	0	0	0	0	0	0	0	0	0	0	0	0	0	0	0	0	0	0	0
ENSMUSG00000015846	59	55	24	10	90	31	61	58	43	38	44	59	30	86	29	31	18	42	51	31	28	66	72	26	8	50	7	93	23	71	144	38	57	114	41	70	81	6	36	35	55	73	40	47	103	10	114	39	315
ENSMUSG00000015850	2	3	3	3	2	15	2	3	3	3	6	3	3	3	3	3	9	2	3	2	2	24	2	6	2	2	2	2	41	3	2	2	2	3	2	3	3	2	65	17	2	2	2	2	2	3	3	6	4
ENSMUSG00000015852	0	0	0	0	0	0	0	0	0	0	0	0	0	0	0	0	1	0	0	0	0	0	0	0	0	0	0	0	0	0	0	0	0	0	0	0	0	0	0	0	0	0	0	0	0	0	0	0	0
ENSMUSG00000015854	1	2	1	2	1	1	2	2	3	15	1	1	11	2	1	1	1	1	29	20	1	8	22	20	32	3	3	1	2	1	1	2	1	2	2	2	30	11	77	14	1	2	35	1	2	2	3	5	0
ENSMUSG00000015869	892	702	537	852	1132	616	952	916	1045	699	621	956	581	653	325	493	508	833	666	513	622	465	755	614	1435	1197	1083	1180	1551	1116	1033	801	713	574	502	1018	1557	1541	1037	625	2086	1251	828	971	1486	1072	855	1861	1319
ENSMUSG00000015879	1	1	1	1	0	10	0	1	0	1	4	1	1	1	1	1	1	1	0	6	0	0	0	0	0	0	3	0	0	1	0	14	0	0	0	22	0	0	0	0	0	0	13	0	0	1	9	1	2
ENSMUSG00000015880	1308	2656	2280	1627	1241	1920	1857	2048	1806	2136	2012	1267	1515	1305	1879	1563	1337	1749	1966	2247	2760	2226	1889	2598	1724	1825	1949	1458	1571	2840	1928	2872	1692	2189	2723	2172	1776	1079	2052	2458	1201	1365	1921	1677	1319	2616	2457	2379	305
ENSMUSG00000015882	10	22	7	14	0	9	7	5	7	7	8	12	10	24	26	3	3	3	34	3	17	0	2	6	14	16	4	3	3	18	9	2	16	16	8	7	11	8	0	4	17	31	16	3	6	9	10	8	8
ENSMUSG00000015889	3	2	1	3	2	8	1	1	29	1	2	2	2	2	2	9	1	1	1	1	1	2	2	1	2	1	1	2	2	2	3	1	1	1	1	1	2	3	2	1	3	1	1	1	1	1	1	1	0
ENSMUSG00000015890	0	2	0	0	0	0	0	0	0	0	0	0	0	0	0	0	1	0	0	0	0	0	0	0	0	0	0	0	0	0	0	0	0	0	0	0	0	0	0	0	0	0	0	0	0	0	0	0	0
ENSMUSG00000015932	241	165	68	133	155	103	166	121	132	85	98	109	31	90	40	33	43	90	58	68	104	148	190	74	176	177	154	98	108	105	191	113	120	164	128	57	189	149	115	59	59	63	83	91	138	60	102	112	245
ENSMUSG00000015937	53	19	34	21	33	23	47	13	31	13	28	11	38	37	32	25	27	31	32	48	36	28	19	46	61	26	63	17	25	29	6	44	50	41	41	69	45	30	57	48	25	26	27	53	24	47	91	39	35
ENSMUSG00000015942	0	0	0	0	0	0	0	0	0	0	0	0	0	5	0	0	0	0	0	0	0	0	0	0	0	0	0	0	0	0	0	0	0	0	0	0	0	0	0	0	0	0	0	0	0	0	0	0	25
ENSMUSG00000015943	3	4	3	4	3	2	42	4	4	12	3	65	4	4	3	3	19	11	3	25	15	3	2	3	3	31	4	3	3	3	41	8	3	4	8	4	57	2	3	4	10	3	3	60	8	4	4	19	1
ENSMUSG00000015944	31	43	37	76	33	29	32	50	53	52	52	40	61	34	15	47	39	50	63	29	28	41	45	31	17	52	69	51	20	25	51	41	36	24	32	28	35	44	73	15	100	78	49	58	76	22	40	31	47
ENSMUSG00000015947	2	2	0	2	1	7	6	1	6	1	10	8	2	2	0	0	9	2	0	0	0	3	7	1	1	1	1	6	2	1	1	7	1	45	1	1	1	1	1	1	1	1	1	1	1	1	1	2	0
ENSMUSG00000015950	2	1	1	2	2	1	2	1	1	1	2	2	1	1	1	1	3	1	1	2	1	2	3	2	2	1	1	3	2	2	3	1	1	1	1	1	2	4	2	1	2	2	1	2	1	1	1	1	1
ENSMUSG00000015957	1	1	0	1	0	3	1	0	0	0	0	0	1	1	0	0	2	0	0	0	0	0	0	0	1	0	1	1	1	0	1	0	0	0	0	0	0	1	0	0	0	0	0	0	0	0	0	0	4
ENSMUSG00000015961	1378	1445	1556	1595	1562	1501	1493	1449	1613	1407	1612	1664	1357	1725	1087	628	1051	1232	1184	1015	1194	1420	1045	1688	1525	1443	1527	1564	1177	1566	1338	1612	1743	1880	1836	1816	1387	1260	1438	1412	1218	1368	1229	1385	1257	1349	1680	1871	2324
ENSMUSG00000015962	0	0	0	0	0	3	0	0	0	0	0	0	0	0	0	0	1	1	0	0	0	0	0	0	0	0	0	0	0	0	0	0	0	0	0	0	0	0	0	0	0	0	0	0	0	0	0	1	0
ENSMUSG00000015966	5	17	4	60	17	18	0	1	13	13	23	32	26	11	17	11	22	14	44	13	19	23	28	11	32	49	15	46	53	9	21	13	5	39	11	63	18	16	54	16	41	45	21	24	21	28	38	27	47
ENSMUSG00000015968	46	17	15	19	8	20	14	17	39	28	18	8	14	16	23	14	14	28	25	35	23	41	26	20	9	24	20	18	6	13	19	31	12	14	27	7	11	8	16	19	16	14	29	33	12	31	16	34	0
ENSMUSG00000015970	134	100	148	68	37	157	89	108	97	71	73	124	123	135	74	131	137	81	165	79	67	82	153	58	43	52	66	63	76	76	102	76	57	36	71	53	61	61	43	80	102	50	81	69	99	69	75	51	30
ENSMUSG00000015971	88	53	54	45	41	70	38	47	54	52	45	65	58	38	24	66	51	41	66	33	57	45	20	37	74	42	42	68	73	57	45	42	48	48	32	43	89	50	50	52	41	40	36	37	50	43	27	31	51
ENSMUSG00000015980	3	35	3	2	7	12	14	22	29	3	1	10	2	2	36	0	23	1	6	5	1	0	1	0	26	11	17	9	1	20	84	18	21	16	15	6	0	23	3	0	6	3	3	6	6	0	14	0	52
ENSMUSG00000015981	2	64	44	9	14	3	8	18	0	1	20	4	2	3	2	2	2	1	1	53	3	1	1	2	25	21	5	28	3	10	51	1	21	8	3	50	1	24	4	11	15	19	10	21	50	42	45	1	1
ENSMUSG00000015994	307	380	226	310	279	261	337	254	289	310	367	268	279	154	208	301	327	289	282	248	203	204	169	229	386	277	254	293	355	282	341	303	327	188	213	199	244	177	152	183	310	181	229	221	233	182	227	200	193
ENSMUSG00000016018	114	168	172	135	205	198	230	265	162	187	155	333	120	313	226	197	274	185	127	184	133	195	109	277	283	205	123	226	283	212	136	164	131	106	179	188	348	296	128	251	150	218	134	143	267	281	132	174	418
ENSMUSG00000016024	7	209	117	67	10	24	76	12	5	19	46	13	513	15	8	46	49	55	152	97	116	107	31	101	6	3	12	43	91	29	4	23	4	18	28	32	100	94	70	155	76	87	34	36	32	253	40	98	11
ENSMUSG00000016028	393	331	315	421	477	509	590	395	351	418	601	565	372	351	269	280	317	466	241	364	368	417	368	375	390	291	202	530	461	362	475	380	414	382	418	316	357	630	485	450	612	420	302	583	481	431	370	307	30
ENSMUSG00000016128	253	324	243	343	338	265	321	259	269	364	364	249	250	296	302	266	412	397	231	366	217	189	270	340	261	211	203	243	294	216	341	217	307	202	261	176	236	326	187	163	196	204	197	352	320	277	185	296	114
ENSMUSG00000016150	0	0	6	0	0	0	0	0	0	0	0	0	0	0	0	0	0	0	5	0	2	0	4	0	0	0	0	0	1	0	0	2	0	0	0	14	10	0	0	0	0	0	0	0	1	10	8	0	0
ENSMUSG00000016179	2	0	10	12	1	8	3	6	0	4	15	0	3	9	9	17	10	8	0	18	10	0	9	5	0	4	5	11	0	1	8	0	11	0	0	0	0	22	3	10	10	17	14	4	25	5	3	15	0
ENSMUSG00000016181	210	288	302	324	299	149	175	240	161	212	164	345	243	293	297	305	320	284	371	325	418	165	282	219	79	268	232	146	338	81	257	277	203	246	465	293	216	180	227	396	243	357	333	182	254	158	445	551	215
ENSMUSG00000016194	0	3	0	0	0	0	1	2	0	0	0	0	0	2	0	0	1	0	0	0	1	7	3	0	1	3	0	0	0	2	1	0	4	0	0	1	3	2	0	5	4	0	1	2	0	1	2	4	0
ENSMUSG00000016200	22	16	19	20	30	8	39	17	12	15	23	26	24	4	16	5	6	21	12	11	13	7	21	8	21	20	21	20	9	23	33	13	20	23	18	24	13	27	14	17	31	9	28	28	42	14	25	15	5
ENSMUSG00000016206	0	0	0	0	0	0	0	0	0	0	0	1	1	0	0	0	1	1	0	0	0	0	0	1	0	2	0	0	0	0	0	0	0	0	1	0	0	0	0	0	0	0	0	0	0	0	0	0	0
ENSMUSG00000016239	12	10	9	9	0	6	0	3	12	1	2	2	0	14	12	11	13	12	31	19	2	22	1	10	6	2	2	4	0	8	0	3	1	3	8	0	21	5	0	8	12	10	5	11	4	11	13	19	170
ENSMUSG00000016252	32	21	17	28	43	46	60	64	32	51	78	44	37	25	33	31	25	7	56	54	37	33	29	47	56	68	78	79	68	76	59	51	76	51	84	55	95	186	67	89	80	68	62	93	70	83	96	99	9
ENSMUSG00000016253	257	207	122	137	379	204	301	218	143	173	200	211	140	143	105	139	76	148	67	189	156	194	68	238	377	243	270	468	463	240	344	171	299	264	201	204	292	515	210	209	160	147	112	423	152	238	158	146	67
ENSMUSG00000016255	0	0	0	0	0	0	0	0	0	0	0	0	0	0	0	0	0	0	0	0	0	0	0	0	0	0	0	0	0	0	0	4	0	0	0	0	0	0	0	0	0	0	0	0	0	0	0	0	0
ENSMUSG00000016256	4	6	6	5	5	17	7	7	34	6	5	5	6	6	25	5	10	5	31	5	7	29	4	6	6	8	9	17	6	5	4	6	5	7	7	7	37	29	19	156	6	9	33	6	8	82	8	12	67
ENSMUSG00000016257	389	386	331	433	414	416	547	582	523	490	463	554	645	533	708	511	608	670	723	533	414	667	453	601	452	404	482	295	397	387	295	487	371	487	314	449	624	573	599	493	349	504	401	536	423	503	471	576	429
ENSMUSG00000016262	0	0	0	0	0	0	0	0	0	0	0	0	0	0	0	0	0	0	0	7	0	0	0	0	0	0	0	0	0	0	0	0	0	0	0	0	0	0	0	0	0	0	0	0	0	0	0	0	0
ENSMUSG00000016283	0	0	0	0	0	0	0	0	0	0	0	0	0	0	0	0	0	0	0	0	0	0	0	0	0	1	0	0	0	0	0	0	0	0	0	0	0	0	0	0	0	0	0	0	0	0	0	0	0
ENSMUSG00000016308	99	82	24	111	69	38	85	57	37	86	73	62	67	25	45	93	94	55	112	92	82	85	57	18	27	31	77	53	66	49	66	48	69	95	39	20	30	38	95	69	73	37	70	66	61	30	70	39	1123
ENSMUSG00000016319	355	407	541	412	334	405	286	355	249	396	410	285	561	895	537	592	507	512	560	483	418	454	567	397	295	290	323	342	344	397	447	424	398	398	396	463	674	272	567	389	475	427	372	382	471	440	269	443	350
ENSMUSG00000016327	0	0	0	0	0	0	0	0	0	0	0	0	0	0	0	0	0	0	0	0	0	0	0	0	0	0	0	0	0	0	0	0	0	0	0	0	0	0	0	0	0	0	0	0	0	0	0	0	0
ENSMUSG00000016344	10	6	19	2	12	14	12	16	9	24	10	19	125	22	44	21	16	48	30	44	30	22	39	50	23	14	26	26	7	11	38	12	30	14	13	38	20	36	62	47	19	15	51	72	26	36	11	35	8
ENSMUSG00000016346	1	1	1	1	1	6	1	1	1	1	1	1	1	1	1	1	1	1	0	0	1	0	0	1	1	1	1	1	1	1	33	1	1	1	1	1	1	0	1	1	0	1	1	1	1	1	1	1	0
ENSMUSG00000016349	0	0	0	0	0	0	0	0	0	0	0	0	0	0	0	0	0	1	0	0	0	0	0	0	0	0	0	0	0	0	0	0	0	0	0	0	0	0	0	0	0	0	0	0	0	0	0	0	0
ENSMUSG00000016356	0	4	0	0	0	0	0	0	0	6	12	0	4	0	0	0	5	1	0	0	0	0	0	0	0	0	0	0	0	6	0	0	0	0	0	0	0	0	0	0	6	0	5	0	0	0	0	0	0
ENSMUSG00000016382	19	49	19	48	23	48	25	10	28	13	22	5	35	5	2	7	20	37	11	26	10	13	8	53	6	1	18	3	0	33	9	4	7	33	0	23	8	26	29	12	2	34	25	32	35	38	0	28	27
ENSMUSG00000016386	0	0	0	0	0	0	0	0	0	0	0	0	0	1	0	0	0	4	0	0	2	0	0	0	0	0	0	0	14	0	0	0	0	0	0	0	6	0	5	0	0	1	0	0	1	1	0	0	23
ENSMUSG00000016409	248	154	80	113	232	126	179	265	243	194	161	165	212	153	158	169	80	67	96	167	147	180	165	278	271	303	312	304	341	148	184	244	239	226	184	261	355	301	214	289	160	229	250	326	265	291	259	167	23
ENSMUSG00000016427	120	285	100	30	127	135	51	139	182	70	192	130	247	405	165	301	211	197	280	307	282	426	329	548	175	81	169	38	138	106	106	208	175	183	338	157	176	57	202	266	153	186	245	286	222	168	141	91	0
ENSMUSG00000016477	1	1	15	1	0	0	0	1	1	0	0	1	1	1	1	0	0	3	0	0	0	0	0	0	0	0	0	0	21	1	0	0	0	0	0	0	0	0	0	0	0	0	0	0	0	1	1	0	0
ENSMUSG00000016481	103	12	20	3	20	26	14	50	29	31	45	60	12	39	23	22	31	18	27	10	20	21	5	14	33	25	17	32	0	30	20	6	41	20	30	13	25	15	26	25	23	17	34	12	32	45	33	12	1
ENSMUSG00000016487	691	393	495	641	395	340	582	567	517	421	404	470	204	455	503	459	372	553	446	325	276	467	251	446	380	366	431	288	385	413	245	275	305	314	363	333	213	227	285	318	292	259	235	193	400	230	356	233	207
ENSMUSG00000016493	0	0	0	0	0	0	0	0	0	0	0	0	0	0	0	0	0	0	0	0	0	0	0	0	0	0	0	0	0	0	0	0	0	0	0	0	0	0	0	0	0	0	0	0	0	0	2	3	0
ENSMUSG00000016494	0	0	0	0	0	0	0	0	0	0	0	0	0	0	0	0	1	0	0	0	0	0	0	0	0	0	0	0	0	0	0	0	0	0	0	0	0	0	1	0	0	0	0	0	0	2	0	0	0
ENSMUSG00000016495	27	30	18	18	24	31	68	21	32	43	24	35	12	30	15	6	14	10	3	20	19	13	21	8	26	9	21	49	21	23	2	20	9	1	5	39	14	17	15	7	17	4	26	5	20	31	4	32	3
ENSMUSG00000016496	0	0	0	3	0	0	0	0	0	0	0	0	1	2	3	2	0	1	0	1	0	0	0	1	0	0	0	0	0	0	0	0	0	0	0	0	0	0	0	1	2	0	2	0	0	0	0	0	0
ENSMUSG00000016498	0	0	0	0	0	0	0	0	0	0	0	0	0	1	0	0	0	0	0	0	0	0	0	0	1	0	0	0	0	0	0	0	0	0	0	0	0	0	0	0	0	0	0	0	0	0	0	0	4
ENSMUSG00000016503	33	5	14	38	5	4	16	15	12	8	12	31	10	1	10	9	36	18	6	10	17	19	6	5	37	20	22	23	27	16	24	18	19	19	15	20	29	9	11	21	37	12	21	5	10	17	21	16	25
ENSMUSG00000016510	136	189	50	408	182	138	80	170	102	241	285	102	169	19	46	11	182	77	163	162	167	285	67	194	205	157	127	311	265	153	65	112	246	395	85	124	42	49	202	209	53	68	45	132	130	186	13	189	94
ENSMUSG00000016520	141	205	235	345	211	241	178	229	132	210	202	264	261	271	201	176	217	234	155	203	187	212	274	177	166	155	162	205	167	255	163	111	162	228	161	158	225	219	231	254	431	397	461	258	292	197	297	235	363
ENSMUSG00000016524	17	2	13	7	1	4	1	1	36	12	1	1	2	41	14	1	1	1	11	28	6	7	48	19	1	1	5	33	1	1	1	1	54	12	10	1	41	14	5	1	27	3	1	22	3	1	57	1	5
ENSMUSG00000016526	52	78	60	73	5	66	26	79	8	48	94	55	78	48	57	39	131	137	146	31	44	52	87	28	14	36	33	79	82	22	0	89	38	52	24	38	42	122	24	55	42	57	45	75	35	54	53	22	312
ENSMUSG00000016528	170	1014	78	219	135	157	89	420	109	9	115	7	17	18	266	122	144	146	3	141	119	117	84	141	8	10	49	60	18	127	213	16	92	99	8	127	83	35	7	143	61	44	112	139	8	11	200	6	283
ENSMUSG00000016529	0	0	0	0	0	0	0	0	0	0	0	17	0	0	0	0	1	0	0	0	6	0	0	0	0	0	0	0	0	0	0	0	0	0	0	0	0	0	0	0	0	0	0	2	0	0	0	0	0
ENSMUSG00000016534	35	63	98	144	44	40	85	43	51	57	106	94	38	43	48	43	67	91	15	23	24	53	93	60	36	40	51	37	58	16	75	33	63	67	27	54	88	36	21	55	41	18	37	30	23	29	47	19	741
ENSMUSG00000016541	23	172	136	6	50	77	34	54	158	5	47	3	5	229	4	175	115	18	123	26	58	113	62	9	90	58	203	140	156	156	3	64	16	79	122	117	46	27	83	76	17	27	0	32	2	66	68	86	117
ENSMUSG00000016552	280	309	215	248	289	190	277	227	241	225	241	222	277	320	282	267	346	327	197	325	225	208	255	333	171	105	130	242	189	143	163	185	284	191	237	221	166	248	100	234	150	203	295	243	223	203	147	116	32
ENSMUSG00000016554	58	113	90	139	72	105	90	122	107	170	91	119	157	93	171	71	53	61	122	152	77	94	184	68	147	86	78	175	145	199	139	115	121	202	137	85	185	204	150	155	131	151	141	141	125	158	75	125	90
ENSMUSG00000016559	6505	6027	4476	6120	5829	6648	6232	8362	6550	7001	7556	8660	4265	3950	4490	4452	4577	4810	3872	5600	5763	5798	5361	5526	7653	6684	6255	7958	7281	7833	7392	8266	7755	9024	6042	8156	7413	6965	7224	5875	4901	5186	6287	7408	6151	6878	6113	5587	3075
ENSMUSG00000016619	1072	967	880	954	877	972	853	937	882	922	928	1049	696	706	602	668	802	692	601	716	677	802	723	756	1139	880	926	894	903	999	885	1006	815	732	1042	887	659	691	717	830	1120	655	673	553	716	588	739	705	865
ENSMUSG00000016624	1	3	2	0	0	4	0	0	2	1	1	4	10	0	0	12	7	2	0	1	0	11	4	0	0	2	0	5	4	0	2	4	2	4	0	2	0	0	9	3	0	2	2	0	1	2	0	0	0
ENSMUSG00000016626	4869	7447	9198	6039	4684	5644	5553	6133	6959	7120	7330	4230	10790	8522	8775	8493	6721	7648	11419	8574	8918	7082	7159	7182	3833	4889	5103	4037	4284	6220	5016	7412	5049	5845	9290	5566	5128	4566	5765	9300	4846	6277	8673	5901	5084	6480	7446	7612	2811
ENSMUSG00000016637	0	0	0	0	8	1	0	0	0	0	0	0	0	0	12	0	0	0	0	7	2	0	0	0	0	7	1	0	0	0	18	3	0	0	0	0	0	0	0	0	0	0	2	0	0	11	2	0	14
ENSMUSG00000016664	3951	4735	3884	5306	4766	4835	5048	4764	4225	4038	4079	4052	3049	3431	4096	3379	3513	4749	2498	4285	3830	4407	3830	5318	5683	4028	4667	5631	5741	4606	5014	3623	4616	3699	3116	3855	3837	4264	3159	3678	4152	3408	4026	4632	4171	4871	2732	2816	1143
ENSMUSG00000016756	0	0	4	4	0	0	7	0	4	0	0	0	0	0	0	0	0	1	1	0	0	6	0	0	3	0	0	0	2	4	0	3	0	6	0	0	0	3	0	9	0	0	0	0	4	0	0	0	11
ENSMUSG00000016757	73	17	123	43	20	22	21	8	21	49	12	15	40	58	16	178	24	7	87	60	9	52	8	43	25	43	3	9	15	18	27	7	7	7	10	43	156	11	9	182	103	57	34	42	72	75	6	8	24
ENSMUSG00000016758	262	192	129	222	509	214	385	409	406	448	356	490	201	194	173	146	236	143	165	326	203	282	283	297	375	312	368	331	412	330	335	393	439	355	258	290	369	435	299	252	271	239	232	376	381	287	280	350	136
ENSMUSG00000016763	0	0	0	0	0	0	0	0	0	0	0	0	0	0	2	0	0	1	0	0	0	0	0	0	0	0	0	5	0	0	0	0	0	0	0	0	0	0	9	20	3	0	0	3	0	0	6	2	0
ENSMUSG00000016831	3	58	21	28	3	3	1	3	19	4	8	2	1	35	29	87	3	3	5	42	39	9	9	2	5	19	4	10	33	32	14	11	100	14	46	20	6	62	22	44	10	115	26	86	27	57	31	3	392
ENSMUSG00000016833	35	11	0	1	1	7	11	3	6	2	6	12	4	1	4	1	7	11	2	4	8	1	1	11	7	7	12	7	6	27	20	5	4	0	1	9	22	1	14	0	18	13	0	14	10	0	0	14	7
ENSMUSG00000016918	0	0	0	0	0	0	0	0	0	0	0	0	0	0	0	0	0	1	0	0	0	0	0	0	0	0	0	0	0	0	0	0	0	0	0	0	0	0	0	0	1	0	0	0	0	1	0	0	0
ENSMUSG00000016921	310	260	243	540	641	406	642	498	646	539	717	613	765	693	781	644	580	497	599	1000	503	688	1030	733	511	458	450	528	503	636	552	500	665	583	345	402	524	752	816	649	682	583	554	751	886	562	525	525	304
ENSMUSG00000016933	3	46	4	137	3	30	23	1	8	23	3	33	74	22	67	41	22	18	69	29	14	136	37	15	34	13	12	49	9	3	58	12	33	63	38	9	3	95	2	39	15	49	37	23	14	38	30	3	43
ENSMUSG00000016940	45	4	20	16	47	22	45	49	8	43	38	16	33	20	41	11	26	36	29	58	7	40	49	58	31	74	12	34	21	5	13	104	50	28	42	19	56	39	30	35	30	71	10	65	26	23	40	25	0
ENSMUSG00000016942	0	0	0	0	0	0	0	0	0	0	0	0	0	0	0	0	0	0	0	0	0	0	0	0	0	0	0	0	0	3	0	0	0	0	0	0	0	0	0	0	0	0	0	0	0	0	0	0	0
ENSMUSG00000016946	2213	2668	2530	2609	2815	2515	3334	3086	2522	2785	3387	3504	1972	1820	2030	2147	2131	2352	1586	2673	1965	1895	1711	2010	3080	2813	2455	3473	3133	2360	2911	2335	2996	2675	2305	2569	1953	2173	1682	2050	2809	1962	2474	2609	2510	1914	2137	1746	145
ENSMUSG00000016982	1	0	1	1	1	0	0	0	0	0	1	1	1	1	1	4	1	1	1	0	0	1	1	0	5	0	0	0	0	1	1	0	0	0	0	0	0	1	0	0	0	3	0	0	3	0	0	1	0
ENSMUSG00000016984	579	732	892	909	694	680	699	681	555	589	726	838	586	614	575	831	966	601	759	628	584	890	575	591	714	700	734	490	555	846	528	655	425	399	664	504	472	471	531	511	529	575	475	478	759	436	749	484	796
ENSMUSG00000016995	0	0	0	0	0	0	0	0	0	0	0	0	0	0	0	0	1	3	0	0	0	0	0	0	0	0	0	0	0	0	0	0	0	0	0	0	0	0	0	0	0	0	0	0	0	0	0	0	0
ENSMUSG00000016998	0	0	0	0	0	0	0	0	0	0	0	0	0	0	0	0	2	0	0	0	0	0	0	0	0	0	0	0	0	0	0	0	0	0	0	0	0	0	0	0	0	0	0	0	0	0	0	0	2
ENSMUSG00000017000	0	0	0	0	0	0	0	0	0	0	0	0	0	0	0	0	0	0	0	0	0	0	0	0	0	0	0	0	0	0	0	0	0	0	0	0	0	0	0	0	0	0	0	0	0	0	0	0	0
ENSMUSG00000017002	0	0	0	0	0	0	0	0	0	0	0	0	0	0	0	0	0	0	0	0	0	0	0	0	0	0	0	0	0	0	0	0	0	0	0	0	0	0	0	0	0	0	0	0	0	0	0	1	0
ENSMUSG00000017004	0	0	0	0	0	0	0	0	0	0	0	0	0	0	0	0	0	0	0	0	0	0	0	0	0	0	0	0	0	0	0	0	0	0	0	0	0	0	0	0	0	0	0	0	0	0	0	1	0
ENSMUSG00000017007	0	0	0	0	0	0	0	0	0	0	0	0	0	0	0	0	1	1	0	0	0	0	0	0	0	0	0	0	0	0	0	0	0	0	0	0	0	0	0	0	0	0	0	0	0	0	0	0	0
ENSMUSG00000017009	14	30	34	14	9	39	50	183	234	8	9	10	83	15	10	8	17	42	29	59	67	9	10	113	7	6	13	10	9	10	124	7	7	7	5	66	104	180	26	6	64	21	35	7	6	35	22	117	0
ENSMUSG00000017049	0	0	0	0	0	0	0	0	0	0	0	0	0	0	0	0	0	0	0	0	0	0	0	0	0	0	0	0	0	0	0	0	0	0	0	0	0	0	0	0	0	0	0	0	0	0	0	0	0
ENSMUSG00000017057	1	1	1	1	1	1	1	1	0	1	1	1	1	1	1	1	1	1	1	1	1	1	1	6	7	0	0	1	1	1	1	1	1	1	0	1	1	1	1	1	1	1	1	1	1	1	0	1	0
ENSMUSG00000017064	0	0	0	0	0	0	2	0	0	1	0	0	0	0	0	0	0	0	0	0	0	0	0	0	0	0	0	0	0	0	0	0	0	0	0	0	0	0	0	0	0	0	0	0	0	0	0	0	0
ENSMUSG00000017119	1069	1503	1045	1428	1662	1275	1726	1725	1626	1433	1625	1773	1154	1289	1411	1170	1293	1423	975	1854	1264	1340	1388	1583	1666	1437	1324	1831	1720	1606	1753	1695	2014	1950	1479	1619	1524	1436	1305	1444	1350	1321	1794	1879	1564	1898	1382	1582	532
ENSMUSG00000017132	309	269	295	210	178	208	288	238	224	315	346	377	422	284	458	357	653	429	383	261	212	203	210	292	261	258	219	270	266	166	165	216	240	204	163	162	142	253	149	148	274	235	243	280	205	159	171	211	667
ENSMUSG00000017144	1	0	6	5	4	1	14	2	10	10	13	4	44	3	0	0	15	20	21	7	1	0	5	4	0	4	1	0	0	5	1	8	7	10	9	7	6	0	2	9	4	3	10	3	6	3	10	7	124
ENSMUSG00000017146	521	480	439	460	387	485	471	626	485	513	429	449	408	567	370	645	441	466	520	563	528	641	613	524	533	528	483	579	511	519	354	428	479	493	424	478	748	665	633	543	735	644	520	456	521	576	412	437	90
ENSMUSG00000017167	74	68	64	94	54	60	69	47	36	60	67	99	81	82	62	80	84	96	96	79	73	88	67	72	88	83	39	76	66	90	82	59	46	123	50	62	31	78	71	48	123	146	95	74	112	66	111	72	254
ENSMUSG00000017176	2	3	3	3	2	9	2	3	3	3	3	3	3	4	3	3	3	3	3	3	3	3	2	3	2	2	2	2	2	3	2	3	2	3	3	3	2	2	3	3	2	2	2	2	2	3	3	3	39
ENSMUSG00000017188	12	7	2	13	27	31	4	14	45	49	23	50	8	5	0	7	13	0	0	13	9	13	0	12	19	9	10	23	21	30	9	24	28	40	21	0	16	4	20	5	14	9	13	21	6	22	4	12	4
ENSMUSG00000017195	0	0	1	0	0	0	0	0	9	0	0	0	1	0	2	0	3	0	0	2	0	0	0	0	0	0	0	0	7	0	0	0	4	0	1	0	0	0	0	0	0	0	0	0	0	0	0	6	3
ENSMUSG00000017204	0	0	0	0	0	2	0	0	0	0	0	0	0	0	0	0	3	0	0	0	0	0	0	0	0	0	0	0	0	0	0	0	0	0	0	0	0	0	0	0	0	0	0	0	0	0	0	0	0
ENSMUSG00000017210	260	86	107	190	181	285	168	395	265	152	190	122	142	172	322	274	114	137	134	185	152	265	278	250	426	368	277	284	232	193	399	306	464	390	164	491	435	509	213	309	336	224	359	332	338	394	337	533	79
ENSMUSG00000017221	1314	1513	1120	1779	1960	1273	1779	1569	1528	1553	1513	1120	1197	1143	1227	1075	1419	1442	943	1713	1064	1040	1574	1507	1931	1392	1584	2153	2343	1244	2058	1726	2121	1457	1200	1576	1699	2049	1299	1343	1757	1252	1384	2242	1484	1405	956	1339	533
ENSMUSG00000017264	618	478	410	573	727	623	620	573	613	516	463	495	510	642	497	506	472	522	290	614	592	542	839	682	596	500	315	639	739	402	589	422	531	440	429	403	690	618	652	430	595	564	424	453	591	498	431	491	277
ENSMUSG00000017286	234	96	87	121	166	183	144	119	161	130	111	199	85	150	62	58	141	77	81	85	87	93	96	149	144	97	127	151	166	109	173	102	190	90	171	105	114	131	108	142	93	100	138	101	82	96	121	103	92
ENSMUSG00000017288	27	63	119	24	18	46	37	34	74	57	23	7	85	32	91	50	72	57	84	34	63	68	81	36	87	22	48	43	39	36	58	32	35	44	43	47	86	31	56	77	88	51	66	38	18	56	87	95	4
ENSMUSG00000017291	1572	1900	2203	1662	1574	1626	1656	1876	2179	1980	2056	2549	1717	1710	1439	1766	2095	1390	2234	1517	1383	1957	1743	1757	1306	1845	1811	1512	1552	2296	1247	2175	1816	1771	2443	1550	1179	1164	1103	1622	1567	1285	1537	1356	1654	1343	1874	1185	1930
ENSMUSG00000017299	4	36	60	95	65	67	35	62	25	84	164	31	55	26	152	18	50	18	55	56	32	71	11	24	59	66	112	5	177	60	43	24	34	5	30	84	124	36	73	32	11	85	6	5	64	72	35	64	21
ENSMUSG00000017307	10	51	14	11	21	25	22	25	3	3	0	1	8	12	10	42	23	10	1	18	4	19	69	27	14	33	26	33	51	10	17	26	102	3	11	91	8	43	33	8	19	49	20	10	10	23	3	47	13
ENSMUSG00000017309	1	0	0	0	0	0	0	0	0	0	0	0	0	0	0	0	2	0	0	0	0	0	1	0	0	0	0	1	1	0	1	0	0	0	0	0	0	1	0	0	0	2	0	0	0	0	0	0	0
ENSMUSG00000017310	0	0	0	0	0	0	0	0	0	0	0	0	0	0	0	0	0	0	0	0	0	0	0	0	0	0	0	0	0	0	0	0	0	0	0	0	0	0	0	0	0	0	0	0	0	0	0	0	0
ENSMUSG00000017311	0	0	0	0	0	2	0	0	0	0	0	0	0	0	0	0	0	1	0	0	0	0	0	0	0	0	0	0	0	0	0	0	2	0	0	0	0	0	0	0	0	0	0	0	0	0	0	0	0
ENSMUSG00000017314	1	0	8	0	11	3	0	5	3	8	22	3	0	33	0	8	2	1	1	3	0	0	26	7	4	5	1	5	19	0	12	1	3	2	1	19	1	0	2	0	0	7	0	0	1	7	4	0	0
ENSMUSG00000017344	0	0	0	0	0	0	0	0	0	0	0	0	2	0	0	3	0	2	0	0	0	0	0	0	4	2	0	0	0	0	0	0	2	0	0	0	0	0	0	0	0	0	0	0	0	0	3	0	0
ENSMUSG00000017376	85	177	210	151	65	112	132	84	94	101	167	108	70	141	107	121	110	105	107	118	65	132	82	92	58	144	117	150	105	101	109	76	91	153	173	140	105	64	97	102	144	94	122	107	70	88	123	124	384
ENSMUSG00000017386	1216	1735	1352	2247	1916	1628	1817	1592	1369	1184	1020	1130	978	1457	1551	1291	2109	1829	1041	1263	910	896	1263	1897	2251	1492	1669	1808	2460	1208	1683	1554	1547	1076	854	1158	1286	1703	1084	799	1445	1157	830	1261	1219	814	949	933	832
ENSMUSG00000017390	0	0	0	0	0	0	0	0	0	0	0	0	0	0	0	0	0	0	0	0	0	0	0	0	0	0	0	0	0	0	0	0	0	0	0	0	0	0	0	0	0	0	0	0	0	0	0	0	0
ENSMUSG00000017400	4	5	6	5	5	5	5	5	5	5	6	6	5	5	7	6	6	6	7	6	6	6	6	6	4	4	4	4	4	5	5	5	5	5	5	5	5	5	5	6	5	5	6	5	5	5	73	6	348
ENSMUSG00000017404	3	3	2	3	2	7	3	3	3	3	2	3	3	3	3	2	2	5	2	2	5	2	2	2	2	6	10	9	2	3	2	2	2	3	6	3	2	8	2	6	2	2	5	2	2	3	3	6	7
ENSMUSG00000017405	0	0	0	0	3	1	1	0	2	0	0	1	0	4	0	0	0	0	0	0	4	0	0	1	0	0	3	0	0	3	6	0	0	1	0	6	0	2	0	0	0	0	0	4	0	0	0	0	1
ENSMUSG00000017412	6	21	43	27	11	12	15	21	16	18	7	28	15	10	32	18	18	16	15	18	9	6	9	15	4	9	18	9	3	14	14	21	7	11	15	26	2	5	18	19	6	7	11	13	8	17	8	13	23
ENSMUSG00000017417	0	0	0	0	0	0	0	0	0	0	0	0	0	0	0	0	0	0	0	0	0	0	0	0	0	0	0	0	0	0	0	0	0	0	0	0	0	0	0	0	0	0	0	0	0	0	0	0	0
ENSMUSG00000017418	96	59	143	92	80	45	91	87	124	137	177	98	124	60	43	99	126	84	83	90	63	105	56	76	69	70	78	65	89	94	71	85	86	59	95	59	42	44	28	57	79	47	50	48	124	111	96	42	99
ENSMUSG00000017421	980	928	720	1108	1177	857	1127	1210	1046	964	1078	1117	885	912	611	716	835	739	686	750	541	805	776	725	1048	857	816	1121	1388	756	1077	854	1016	658	670	783	787	1157	866	628	838	610	621	795	750	672	518	634	630
ENSMUSG00000017428	1440	1837	1549	1804	1707	1377	1334	1851	2032	1851	1342	1126	1430	1514	1598	1601	1442	1812	2013	1814	2141	1601	1768	1712	1466	2180	1870	1711	1990	1898	2066	2560	2533	2238	2216	2340	2185	2258	2016	2545	1251	1699	2065	2445	1520	2615	2722	2836	664
ENSMUSG00000017446	1	0	0	1	1	0	0	0	0	0	1	1	1	4	1	1	2	4	1	1	0	1	1	0	0	0	0	1	0	1	1	0	0	0	0	0	1	1	0	0	2	15	0	0	0	0	0	1	0
ENSMUSG00000017453	0	7	0	0	0	2	0	0	0	0	0	0	0	0	0	0	1	2	0	0	0	0	0	0	0	1	0	0	0	0	0	0	0	0	0	0	0	0	0	0	0	0	0	1	0	0	0	4	3
ENSMUSG00000017466	5	23	0	23	3	11	0	1	110	0	16	7	13	18	0	9	3	54	0	30	34	32	62	2	0	1	1	34	9	1	0	10	55	1	1	0	6	8	10	13	14	1	14	12	23	19	1	17	0
ENSMUSG00000017478	362	370	352	384	423	295	454	393	336	360	401	355	367	285	503	409	396	545	261	444	296	294	435	417	254	280	279	323	317	273	328	278	335	247	283	282	255	290	237	298	287	259	289	314	252	269	382	335	210
ENSMUSG00000017485	6	14	12	8	17	21	23	21	23	19	30	23	19	13	10	12	10	9	11	20	22	26	12	18	8	9	7	21	12	17	18	11	18	9	12	19	9	21	12	4	13	17	9	10	18	11	8	10	12
ENSMUSG00000017491	2	14	18	22	9	0	4	12	11	19	0	4	8	52	9	31	32	45	168	32	56	84	0	19	10	10	13	7	9	0	12	28	12	5	27	24	25	22	12	21	16	7	14	9	5	13	60	86	15
ENSMUSG00000017493	0	0	0	0	0	2	0	1	0	0	0	0	0	0	0	0	0	0	0	0	0	0	1	0	0	0	0	0	0	0	1	1	0	0	0	0	0	0	0	0	0	0	0	0	3	0	0	0	0
ENSMUSG00000017499	392	415	290	368	330	217	190	218	248	294	193	98	142	177	270	218	208	316	215	125	285	202	271	308	276	245	251	238	127	263	189	321	274	353	249	445	260	148	267	337	267	252	214	292	309	276	315	294	242
ENSMUSG00000017548	3724	2945	3478	4185	2905	2710	3514	3513	3221	3379	3447	3585	2920	2835	2150	2477	3103	2831	3918	2296	2478	3142	3086	3159	3267	3754	3074	3507	3602	3576	2476	3340	2562	2903	3313	2830	2444	2481	2170	2224	2912	2557	2393	1909	3191	2169	2765	2764	3789
ENSMUSG00000017550	853	994	1211	724	695	771	909	1022	907	999	1023	1173	946	825	1025	1206	922	1044	1364	919	1035	879	727	978	563	803	783	523	467	934	672	903	654	935	947	891	535	500	545	989	573	546	768	677	614	717	903	783	164
ENSMUSG00000017561	68	102	107	109	104	54	126	114	121	90	65	78	70	64	30	67	75	102	98	66	52	46	38	76	53	122	101	71	83	81	144	87	107	93	135	85	45	103	72	61	46	93	31	90	46	43	70	64	144
ENSMUSG00000017588	0	0	0	0	0	0	0	5	0	0	1	0	0	4	5	5	2	1	1	4	3	1	1	0	0	8	0	0	0	5	0	1	0	0	0	0	3	3	0	3	4	2	0	1	0	0	0	9	0
ENSMUSG00000017607	0	0	0	0	0	0	0	0	0	0	0	0	0	2	0	0	1	0	0	0	0	1	1	0	0	0	0	0	0	0	0	0	0	0	0	0	0	1	0	0	1	0	0	0	0	0	0	0	0
ENSMUSG00000017615	897	1017	1375	1434	1189	1087	1031	1145	1265	1249	1243	1352	708	846	896	933	721	919	1027	1222	1112	906	729	1201	1178	1536	1479	1298	1569	1075	1188	1178	1802	1205	1514	1321	1113	1174	1099	1340	947	1073	1290	1258	933	1501	1282	990	458
ENSMUSG00000017631	390	518	614	445	448	739	446	434	478	562	644	670	998	798	726	646	628	662	602	589	701	890	780	730	486	454	409	530	383	462	399	337	474	360	384	474	452	558	542	584	596	569	651	474	538	479	594	655	448
ENSMUSG00000017639	251	222	224	265	325	215	297	291	352	314	222	254	183	168	349	268	215	184	170	211	165	220	115	214	468	312	324	371	415	283	372	267	474	328	258	282	224	408	256	230	419	263	333	414	294	216	335	258	107
ENSMUSG00000017652	0	0	0	0	0	0	0	9	0	0	0	0	0	1	0	0	0	3	0	0	0	0	0	0	0	0	0	0	0	0	0	0	0	0	0	0	0	0	0	0	4	0	0	0	0	0	0	0	0
ENSMUSG00000017664	104	425	317	449	380	171	213	237	323	181	270	293	281	82	262	164	186	324	192	206	266	194	202	165	242	293	315	239	362	93	357	241	360	60	184	468	414	231	340	183	189	183	149	261	359	271	180	284	138
ENSMUSG00000017667	67	125	100	100	103	93	99	91	115	94	117	98	85	60	66	54	84	65	43	73	46	48	52	50	54	72	80	77	70	79	73	94	88	82	64	56	35	43	52	40	88	54	62	72	88	64	60	42	54
ENSMUSG00000017670	29	70	1	3	81	1	2	2	2	2	43	18	4	29	96	1	6	5	3	3	29	1	3	1	1	12	2	1	2	2	2	4	1	2	1	2	1	1	2	1	15	4	8	1	1	2	2	1	11
ENSMUSG00000017677	1051	1268	1088	1188	1584	1357	1386	1297	1287	1259	1514	1756	1402	1971	2085	1634	2043	1871	2236	1880	1494	1648	2212	1428	973	1096	870	918	1293	1047	944	1317	925	1260	734	1155	1413	850	1192	823	840	1040	1186	740	779	879	1352	1201	1776
ENSMUSG00000017679	246	36	222	122	174	130	149	164	208	260	148	195	231	195	16	138	120	208	105	103	174	62	52	242	276	65	119	174	177	133	154	216	110	266	169	130	83	185	95	54	116	122	135	99	151	46	21	52	65
ENSMUSG00000017686	4107	4740	5777	4450	5211	4843	4832	5511	4106	4962	4983	4981	5515	6431	5108	5535	5139	6171	5652	6095	5310	5878	4398	5673	3198	3007	3304	3960	3440	3527	3112	3591	4022	4238	3133	4210	4785	3635	4116	4514	4481	4688	5369	4495	5247	5528	4237	3747	1506
ENSMUSG00000017688	0	1	0	0	0	0	0	0	0	0	0	0	0	0	0	0	1	0	0	0	0	0	0	0	0	0	0	0	0	0	0	0	0	0	0	0	0	0	0	0	0	0	0	0	0	0	0	0	0
ENSMUSG00000017692	3	5	5	77	4	16	5	6	6	5	5	32	10	4	5	31	4	5	5	5	6	5	4	5	5	7	7	30	5	4	4	5	4	6	6	6	5	3	5	13	6	25	14	5	7	6	7	5	14
ENSMUSG00000017697	166	117	96	308	288	392	296	254	289	137	173	208	187	161	182	121	175	159	61	80	100	321	208	144	389	329	384	219	341	440	340	185	255	362	285	132	335	341	398	114	357	505	88	158	252	218	136	283	451
ENSMUSG00000017707	152	92	154	49	115	94	66	69	62	126	77	109	220	270	170	162	136	249	264	118	136	149	120	101	95	99	85	112	66	109	79	107	98	106	86	21	103	112	86	107	111	94	114	69	170	74	101	90	576
ENSMUSG00000017713	0	0	0	0	0	0	0	0	0	0	0	0	0	0	0	0	1	0	0	0	0	0	0	0	0	0	0	0	0	0	0	0	0	0	0	0	0	0	0	0	0	0	0	0	0	0	0	0	0
ENSMUSG00000017715	591	466	520	488	506	299	368	342	479	358	373	380	334	345	558	383	383	645	545	319	292	422	381	452	617	680	685	637	690	414	658	378	545	454	521	519	405	508	319	285	433	472	413	539	583	420	376	411	807
ENSMUSG00000017716	3158	2561	2033	2578	2010	1840	2206	1821	2170	2353	2518	2631	3346	1829	2242	1927	2191	2104	3335	2753	2736	2768	2184	2184	3403	3173	4063	2951	2822	3149	2564	2308	2490	2700	2578	2738	2694	2911	2684	3123	3266	2839	2959	2779	3010	2095	2107	3677	2045
ENSMUSG00000017718	213	235	229	9	217	202	27	154	118	103	80	168	93	85	182	152	76	185	51	145	78	9	22	201	59	79	99	6	125	8	176	87	56	155	70	53	205	69	160	129	51	38	100	188	51	380	142	145	9
ENSMUSG00000017720	0	0	0	0	0	0	0	0	0	0	0	0	0	0	0	0	0	2	0	0	0	0	0	0	0	0	0	0	0	0	0	0	0	0	0	0	0	0	0	0	0	0	0	0	0	0	0	0	0
ENSMUSG00000017721	43	75	62	64	61	49	116	72	108	23	33	20	35	75	63	17	53	52	36	66	44	51	94	63	90	36	36	85	70	116	141	35	85	19	30	22	67	71	39	45	63	34	18	93	28	46	14	16	2
ENSMUSG00000017723	0	0	0	0	0	0	0	0	0	0	0	0	0	0	0	0	0	0	0	0	0	0	0	0	0	0	0	0	0	0	0	0	0	0	0	0	0	0	0	0	0	0	0	0	0	0	0	0	0
ENSMUSG00000017724	1	1	58	2	22	2	5	1	1	1	2	2	24	29	7	3	28	2	7	20	2	2	2	1	2	7	16	1	16	2	4	1	1	20	29	1	2	23	1	1	5	16	15	1	1	1	5	2	8
ENSMUSG00000017733	0	0	0	0	0	0	0	0	0	0	0	0	0	0	0	0	0	0	0	0	0	0	0	0	0	0	0	0	0	0	0	0	0	0	0	0	0	0	0	0	0	0	0	0	0	0	0	1	0
ENSMUSG00000017734	0	0	2	4	3	0	0	2	0	0	4	0	4	0	0	9	0	1	0	0	0	1	0	0	5	1	0	5	2	0	0	1	0	0	2	0	3	0	0	1	2	2	0	0	0	2	0	1	0
ENSMUSG00000017737	10	22	2	54	57	2	6	50	22	50	78	72	32	1	27	2	97	53	16	45	13	28	69	35	41	15	36	15	28	35	1	15	9	20	34	7	4	31	6	34	46	6	34	11	27	14	26	25	0
ENSMUSG00000017740	97	154	96	98	99	98	150	147	107	115	139	146	82	90	55	74	61	77	54	86	80	100	58	89	122	104	87	134	120	114	106	92	112	121	104	80	63	58	51	98	117	81	109	104	76	102	67	31	52
ENSMUSG00000017747	359	394	341	268	148	369	135	191	297	221	206	192	267	250	161	200	163	251	232	257	355	218	247	241	368	243	262	306	211	225	316	202	329	248	243	255	256	194	457	363	116	260	454	348	300	758	435	215	25
ENSMUSG00000017754	1	1	0	1	0	2	0	0	0	0	0	0	1	1	0	0	3	11	0	0	0	0	0	0	1	0	0	1	1	0	1	0	0	0	0	0	0	0	0	0	2	0	0	0	0	0	0	2	0
ENSMUSG00000017756	281	468	471	294	273	334	309	308	289	330	296	257	220	241	327	351	248	387	243	292	282	343	223	316	278	252	253	319	225	202	286	307	262	198	241	263	185	234	226	247	150	177	252	220	143	204	198	124	37
ENSMUSG00000017760	6	9	4	5	6	24	4	4	4	10	5	6	165	23	6	43	29	4	65	43	58	6	7	46	4	3	3	5	5	30	6	9	4	4	3	4	6	7	5	28	5	33	4	5	4	64	4	5	410
ENSMUSG00000017764	140	281	925	138	1527	750	289	439	218	508	806	1042	558	1170	80	1337	695	444	76	624	113	55	505	227	151	310	165	628	159	77	31	152	121	77	289	28	183	728	516	102	286	522	87	331	52	311	339	199	417
ENSMUSG00000017765	20	3	6	1	13	1	1	14	5	1	12	1	1	1	1	1	1	3	1	7	1	1	7	7	16	1	7	19	30	1	16	3	1	5	1	18	13	17	1	3	3	1	1	9	3	20	1	1	0
ENSMUSG00000017774	1717	1463	1794	2113	2113	1649	1922	2128	1680	1616	1658	1874	2100	2147	2597	2111	2351	2770	1890	2338	1916	2385	2480	2316	2045	1398	1554	2048	1987	1539	1828	1279	1623	1302	908	1346	2196	2551	1962	1697	2525	1626	1709	1758	2147	2168	1460	1563	679
ENSMUSG00000017776	3437	3775	4333	4137	4330	4446	3930	4629	3848	3430	4229	4575	4072	3440	4311	3928	4060	4616	4298	4230	3503	4120	3361	3999	3781	3960	3861	3584	4342	4116	3452	3729	3655	4002	3475	3640	3387	2928	2765	3429	3097	3461	3906	3080	4138	3972	3611	2873	1498
ENSMUSG00000017778	2	1	1	2	1	1	1	1	1	1	1	2	2	2	2	2	4	1	1	3	3	1	1	1	1	1	2	1	3	2	2	1	1	1	3	1	1	2	1	1	2	2	7	6	4	1	1	4	0
ENSMUSG00000017781	47	63	95	126	228	105	82	119	86	78	119	183	112	155	76	91	87	165	110	129	71	90	87	76	116	82	101	128	77	19	133	45	77	107	94	71	242	96	96	30	149	85	88	80	94	200	65	84	240
ENSMUSG00000017801	54	77	102	63	69	43	76	57	52	80	66	50	110	105	188	164	129	100	86	105	92	66	109	66	45	39	47	36	57	16	46	50	50	39	59	34	50	55	48	48	47	58	105	47	64	48	62	59	45
ENSMUSG00000017802	18	436	125	355	74	131	45	112	8	33	45	46	13	177	23	87	26	109	2	148	153	73	78	49	209	63	87	222	31	82	47	387	289	105	137	244	335	131	25	221	45	85	520	144	200	196	201	112	112
ENSMUSG00000017817	1	1	0	0	0	1	0	0	0	0	0	0	0	0	0	0	0	0	0	0	0	0	1	0	0	0	0	0	1	0	1	0	1	4	2	1	0	0	0	0	0	1	0	0	1	1	1	0	0
ENSMUSG00000017830	1	5	1	1	22	14	13	10	0	16	9	5	2	1	2	1	6	1	2	1	1	1	2	1	0	6	1	1	0	1	21	1	1	1	1	1	1	2	1	21	1	0	1	19	0	3	0	1	3
ENSMUSG00000017831	771	566	1178	698	924	573	735	805	745	743	731	1180	1389	1042	821	1310	696	1179	1425	1524	1034	986	1053	903	580	440	687	519	510	670	522	509	450	651	503	539	974	617	1125	527	909	802	1168	742	1179	1237	989	868	406
ENSMUSG00000017832	1	0	0	1	0	3	0	0	0	0	0	0	1	1	0	0	3	2	0	0	0	0	0	0	0	0	0	0	0	0	0	0	0	0	0	0	0	0	0	0	0	0	0	0	4	0	0	0	0
ENSMUSG00000017837	368	215	269	47	272	521	307	124	185	273	186	253	187	176	189	279	123	334	86	263	179	106	148	217	172	161	66	187	490	72	262	113	260	241	111	166	142	221	158	36	133	217	80	205	230	311	139	132	112
ENSMUSG00000017843	2222	2319	2542	2677	3127	2300	2770	2295	2444	2280	2752	2561	2083	2007	2559	1931	2107	2277	2029	2251	1762	2190	1901	2118	2366	2429	2699	2503	2654	2452	2369	2456	2461	2265	2209	2189	1765	2065	1720	1902	2244	2164	1923	2025	2201	2594	2288	2282	2450
ENSMUSG00000017858	92	90	9	152	16	15	38	40	44	34	19	35	5	6	22	50	17	100	82	1	18	46	31	46	9	86	57	50	4	2	129	13	61	33	19	70	22	25	25	28	7	5	11	8	49	25	25	35	76
ENSMUSG00000017861	349	476	330	405	434	380	314	430	315	252	425	359	275	210	194	373	297	289	229	294	249	333	147	268	463	318	384	507	415	535	495	314	393	258	301	338	328	362	495	255	486	341	173	404	473	336	223	336	216
ENSMUSG00000017868	0	0	0	0	0	0	0	0	0	0	0	0	0	0	0	0	1	0	0	0	0	0	0	1	0	0	0	0	0	0	0	0	0	0	0	0	0	0	0	0	0	0	0	0	0	0	0	0	0
ENSMUSG00000017897	0	0	0	0	0	0	0	0	0	0	0	0	0	0	0	0	0	0	0	0	0	0	0	0	0	0	0	0	0	0	0	0	0	0	0	0	0	0	0	0	0	0	0	1	0	0	0	0	0
ENSMUSG00000017929	496	304	485	253	513	372	380	306	418	472	445	462	713	592	321	308	463	423	260	426	702	735	397	336	281	255	266	604	259	490	435	682	368	450	462	255	302	450	502	695	946	626	458	599	799	458	529	474	105
ENSMUSG00000017943	0	0	0	0	0	4	0	0	0	0	0	0	0	0	0	0	0	0	0	0	0	0	0	0	0	0	0	0	0	0	0	0	0	0	0	0	0	0	0	0	0	0	0	0	0	0	0	0	0
ENSMUSG00000017950	0	0	2	2	8	0	3	6	11	8	18	6	1	2	1	5	10	8	1	19	1	0	20	5	2	4	0	9	0	0	15	1	0	0	8	1	15	1	2	0	4	0	6	0	2	16	9	0	0
ENSMUSG00000017969	77	10	61	1	0	5	5	9	0	13	9	13	14	1	0	10	30	35	0	6	7	12	0	4	1	14	31	29	29	14	19	4	20	5	8	30	25	0	2	0	8	11	26	14	26	21	7	35	24
ENSMUSG00000017978	16	1	19	4	5	21	18	15	17	8	5	2	1	10	11	4	1	6	1	2	0	7	2	6	21	26	11	11	7	17	17	2	7	14	6	5	2	0	4	4	5	0	7	2	4	6	0	5	0
ENSMUSG00000017999	599	1296	675	658	577	344	641	355	749	547	351	257	565	552	434	591	588	925	815	741	602	434	430	676	700	1034	1151	183	565	652	1347	568	731	1139	1034	1005	1558	931	1298	1024	487	757	607	517	648	1589	1179	898	348
ENSMUSG00000018001	108	68	91	46	71	65	40	45	48	57	42	43	16	47	61	45	52	52	15	51	23	8	30	35	30	48	41	45	18	45	19	42	38	57	43	50	39	17	41	28	31	41	26	29	33	33	24	33	197
ENSMUSG00000018012	401	305	285	480	521	288	442	400	343	390	344	429	309	313	318	281	418	314	282	398	260	231	342	325	591	400	401	658	622	256	455	481	503	403	287	400	528	481	361	376	544	407	380	632	402	425	268	459	148
ENSMUSG00000018040	164	164	112	79	83	70	98	166	63	121	63	80	36	85	84	78	101	60	71	58	98	72	147	95	67	71	105	105	174	28	93	93	150	94	75	92	78	202	60	83	116	44	39	135	98	67	85	53	49
ENSMUSG00000018042	154	283	294	158	153	122	194	165	184	268	89	139	414	48	223	150	178	177	443	250	135	458	364	247	122	113	176	91	168	226	152	157	228	221	199	144	149	78	312	307	108	232	178	292	130	555	236	206	154
ENSMUSG00000018068	171	421	163	249	196	138	165	98	270	122	143	155	267	142	243	374	287	343	390	372	332	259	204	149	76	318	260	170	203	329	216	202	164	156	278	332	200	137	314	360	209	265	256	238	186	313	314	496	317
ENSMUSG00000018076	1068	1768	2313	1920	1761	1606	1629	1925	1899	1847	1651	1395	1095	1004	1339	949	741	1137	1088	1648	1658	1139	948	1520	1457	1967	1939	1393	1808	1974	1688	2476	2277	2660	2707	2466	1496	1368	1685	2191	821	1102	1327	1930	1379	1842	2155	1637	387
ENSMUSG00000018102	53	30	25	25	35	32	42	51	29	62	39	53	68	36	70	80	46	47	131	68	106	39	55	45	39	49	39	34	34	27	28	38	23	42	29	28	46	39	37	61	19	30	35	66	23	38	35	29	2
ENSMUSG00000018126	8	5	10	16	6	16	19	19	6	14	7	10	34	7	25	17	12	23	17	12	25	4	26	16	12	17	5	9	17	8	16	9	15	19	9	13	10	12	14	3	6	13	9	31	11	15	13	25	5
ENSMUSG00000018143	6	56	33	4	60	14	15	57	51	60	34	29	89	51	42	15	14	32	85	3	30	42	67	24	37	21	9	60	96	19	24	12	50	9	19	2	75	41	20	36	46	9	46	35	30	77	19	50	1
ENSMUSG00000018160	1086	894	1325	1287	1155	1090	816	1212	1342	1364	1495	1192	1483	1675	1659	1544	1424	1421	1608	1567	1544	1599	1381	1204	592	1053	1008	778	766	1003	769	1095	937	1163	1178	1166	800	847	1051	1389	1212	947	1329	985	961	1541	1494	1287	856
ENSMUSG00000018166	319	54	57	375	248	103	243	541	239	371	412	376	299	6	69	143	76	72	35	87	45	39	50	63	306	172	118	189	229	375	74	223	173	83	190	334	71	220	82	37	184	254	71	47	193	74	62	145	49
ENSMUSG00000018167	22	1	15	102	10	5	0	2	1	15	0	4	2	2	1	16	3	4	10	14	0	24	0	7	1	5	1	7	18	0	2	0	0	3	0	18	0	0	24	0	12	5	4	1	11	11	18	0	0
ENSMUSG00000018168	0	0	0	0	0	0	0	0	0	0	0	0	0	0	0	0	0	2	0	0	0	0	0	0	0	0	0	0	0	0	0	0	0	0	0	0	0	0	0	0	5	0	0	1	0	0	4	0	0
ENSMUSG00000018169	55	20	137	12	167	47	108	169	122	64	196	78	319	50	101	118	138	90	36	80	64	58	49	51	102	41	56	61	138	155	25	89	96	41	50	22	29	19	198	79	39	100	80	33	91	31	49	53	0
ENSMUSG00000018171	171	222	120	307	178	171	153	125	142	172	173	280	193	259	32	173	99	47	215	216	134	278	284	146	162	92	177	189	130	214	93	205	172	164	202	145	242	132	182	146	205	254	178	223	167	163	180	180	281
ENSMUSG00000018189	61	70	41	73	38	54	56	50	72	75	111	38	44	38	23	76	72	24	86	36	50	81	96	88	92	105	91	75	109	70	71	71	34	31	66	72	95	75	37	49	103	166	82	99	41	104	90	83	0
ENSMUSG00000018196	19	13	19	4	7	2	8	2	39	2	3	12	32	4	26	7	27	6	20	27	37	149	40	25	4	54	4	3	21	20	27	18	19	18	42	60	52	13	27	52	11	29	65	22	2	31	42	3	321
ENSMUSG00000018199	124	252	127	159	278	147	102	92	81	83	324	274	282	310	194	169	174	386	329	157	184	349	192	105	150	303	250	193	91	235	204	149	195	224	276	227	72	62	98	57	92	197	142	61	123	127	138	229	29
ENSMUSG00000018209	20	67	99	168	97	8	76	15	65	11	143	181	92	38	43	115	106	90	112	171	157	170	130	150	58	8	60	45	30	51	2	73	83	88	42	129	126	5	34	132	42	25	19	48	37	124	94	104	54
ENSMUSG00000018211	2	1	1	2	8	4	1	1	1	1	1	2	2	3	2	1	2	12	5	3	7	14	1	5	1	0	5	1	1	4	1	1	1	1	1	1	1	1	1	8	0	0	0	8	14	1	20	1	0
ENSMUSG00000018217	0	0	0	3	0	0	0	0	0	0	0	0	0	1	18	1	1	0	0	0	14	1	15	0	5	0	7	0	0	0	0	0	0	0	5	0	7	0	0	0	0	0	3	0	0	5	0	1	0
ENSMUSG00000018238	36185	59842	46735	40673	49446	47590	43040	44526	45281	42761	41049	39474	28160	30378	31125	34509	25837	33958	20648	40858	40859	32292	31687	41218	46039	37045	42873	63589	60161	39605	50232	54747	75318	61574	58220	71661	40289	38970	43768	57220	37721	36043	56803	61888	34099	47406	34310	26608	2726
ENSMUSG00000018239	1545	1327	1348	1538	1676	1800	2471	1986	1976	2096	2666	2663	2150	1722	1849	1414	2154	1505	2136	2212	2138	2310	2641	2631	1035	1680	1692	1310	1324	1256	1519	1522	1445	1887	1193	1665	1698	1680	1480	1464	884	1525	1635	1858	1414	2321	2077	2318	441
ENSMUSG00000018259	34	74	0	23	28	36	28	94	89	57	59	41	3	56	26	30	65	36	86	31	38	66	65	42	57	6	104	16	18	38	13	57	15	105	27	55	119	41	54	40	10	11	32	67	63	84	86	137	77
ENSMUSG00000018263	0	0	0	2	0	0	0	0	0	0	0	3	6	0	4	0	16	1	3	1	3	0	0	1	1	2	1	0	0	0	0	0	2	0	0	4	0	0	8	0	0	0	4	3	2	0	0	1	0
ENSMUSG00000018286	383	412	310	620	594	422	546	575	491	472	721	671	402	356	318	383	399	443	365	536	356	459	382	489	696	500	471	845	774	489	593	587	718	520	499	495	666	695	537	614	600	454	500	883	500	452	358	542	307
ENSMUSG00000018287	464	238	245	388	365	395	372	352	372	414	513	579	359	276	221	220	277	215	259	373	314	353	340	321	658	489	517	653	506	611	554	457	503	436	440	496	496	611	638	580	508	420	424	549	359	431	333	423	269
ENSMUSG00000018293	86	68	69	42	20	33	8	13	8	24	28	30	47	77	29	86	43	59	57	50	35	27	60	18	38	33	28	34	32	38	20	24	27	48	54	51	9	22	27	62	101	67	75	34	25	12	36	12	33
ENSMUSG00000018322	1123	1015	758	1640	925	689	959	817	823	993	1195	1088	802	783	741	1002	997	1001	788	1231	605	843	707	782	787	638	605	982	1173	778	818	602	797	693	742	594	624	797	757	643	886	754	760	820	860	622	322	501	815
ENSMUSG00000018326	3066	2680	2569	2922	2736	2964	2644	3048	2999	2952	2869	2681	3033	2707	2727	2949	2904	3025	2913	2919	3369	3176	2727	2929	2648	3169	2883	3570	3067	3024	2446	2884	3238	3066	3701	2951	2813	2670	2939	3461	3038	2616	3250	3199	2751	3802	3474	2762	357
ENSMUSG00000018334	303	304	357	412	611	522	525	441	440	291	364	351	167	260	287	153	226	345	78	280	345	272	261	318	481	517	567	691	489	394	676	538	443	435	427	576	350	591	499	472	601	469	402	576	424	352	425	584	70
ENSMUSG00000018339	1207	1294	1125	1323	1595	1010	1259	1211	1407	1525	1098	774	1046	1433	1835	1441	1490	1351	1017	1701	949	1587	2102	1357	1865	1241	1348	1625	1736	1615	1314	1236	1206	1719	1074	1159	2588	2149	1872	1634	2216	1516	2538	2357	1887	1738	1304	1897	397
ENSMUSG00000018340	128	39	43	138	34	34	15	21	2	11	2	12	5	75	29	12	62	60	24	30	27	39	86	22	44	83	61	50	1	12	73	1	59	51	22	61	9	58	11	55	49	91	48	49	128	42	18	26	78
ENSMUSG00000018341	10	7	18	9	3	6	7	5	14	10	5	10	9	14	13	6	15	14	8	3	9	7	5	6	5	4	2	3	3	15	1	3	9	7	10	16	0	5	3	2	8	5	2	4	12	4	7	7	52
ENSMUSG00000018347	49	94	48	92	158	142	132	69	98	95	85	153	110	114	136	98	39	135	65	143	110	46	44	67	184	124	150	183	152	116	139	74	104	110	65	98	170	241	162	114	159	130	101	174	180	116	52	180	207
ENSMUSG00000018362	1	0	0	0	0	2	1	0	0	1	2	1	1	2	4	0	2	2	3	0	1	2	3	1	1	0	0	0	1	0	0	0	3	0	0	0	0	0	1	0	0	0	1	0	1	1	1	1	11
ENSMUSG00000018363	3290	3661	4465	3852	3727	3342	3168	4132	4061	3304	4413	4674	3210	2492	2449	3096	3287	3046	2477	3227	2739	2807	1805	2553	3580	2867	3240	4241	4434	4258	3429	3602	3186	3229	3472	2656	2361	2798	2660	2519	3982	2940	2923	2972	3427	3111	2510	2148	1540
ENSMUSG00000018372	160	207	199	177	103	186	163	187	191	153	139	119	186	206	266	308	252	174	322	204	300	166	397	186	131	163	138	144	142	144	95	190	142	140	149	149	223	223	233	215	143	183	180	187	191	281	185	207	98
ENSMUSG00000018377	199	173	210	182	132	161	123	118	130	139	167	195	132	212	214	207	257	210	236	129	98	115	134	112	160	131	112	183	117	160	130	152	94	90	145	113	104	90	140	166	304	221	232	92	159	131	139	135	233
ENSMUSG00000018378	1	29	1	33	2	6	1	6	13	9	1	2	22	1	2	20	2	24	6	53	1	18	2	14	16	0	4	1	1	24	108	1	1	1	1	1	2	3	1	9	1	18	1	1	8	2	0	2	0
ENSMUSG00000018379	93	101	95	131	89	84	96	80	65	96	75	105	110	106	125	121	92	183	110	109	118	161	150	90	96	42	67	87	89	91	65	50	98	85	58	66	65	87	96	60	88	81	107	63	103	87	85	100	656
ENSMUSG00000018387	0	0	0	0	0	1	0	0	0	0	0	0	0	0	0	0	1	1	6	0	0	0	0	0	0	0	0	0	0	0	0	0	0	0	0	0	0	0	0	0	0	0	0	0	0	0	0	0	0
ENSMUSG00000018395	762	636	733	711	776	786	823	769	635	764	869	680	645	741	830	992	743	734	969	769	880	879	944	898	1004	755	766	980	775	785	762	701	1028	979	1054	979	1177	832	1298	900	966	884	1200	1317	770	1205	1122	1026	25
ENSMUSG00000018398	0	28	3	0	0	1	10	0	0	0	3	3	0	0	0	0	1	0	0	0	0	0	0	1	0	0	0	5	6	0	0	12	0	1	1	6	0	0	0	0	0	0	0	0	0	0	0	0	0
ENSMUSG00000018401	245	277	219	213	199	275	248	281	177	301	213	238	195	222	234	151	190	253	134	184	268	263	266	273	245	201	122	226	263	187	275	202	217	223	202	233	209	219	182	202	282	198	209	250	334	278	175	236	69
ENSMUSG00000018405	57	10	2	2	27	9	17	2	20	2	19	6	10	28	37	3	6	6	3	17	55	3	7	2	2	2	7	9	8	2	2	2	2	2	16	8	6	11	2	44	9	2	5	2	2	2	2	6	28
ENSMUSG00000018411	8	10	6	0	5	1	0	0	12	6	15	3	0	5	0	6	3	3	0	11	0	4	2	4	23	26	6	3	21	0	14	12	12	17	7	14	2	2	3	6	13	0	15	3	9	5	9	8	4
ENSMUSG00000018412	580	830	1177	717	463	615	593	625	739	950	518	518	824	924	796	742	574	683	729	713	564	674	823	643	538	579	545	625	615	548	719	825	1148	1233	1146	820	446	708	599	1141	988	767	923	1062	672	599	951	679	921
ENSMUSG00000018415	483	563	637	496	667	557	468	459	475	577	598	542	698	580	715	688	793	641	505	549	434	538	432	619	493	523	434	470	500	497	576	490	547	611	517	477	294	417	344	507	438	377	355	389	501	401	308	281	504
ENSMUSG00000018417	150	64	58	139	113	76	138	132	123	106	43	139	87	178	164	83	118	161	167	69	127	114	124	89	123	115	181	141	63	137	112	96	85	65	91	69	187	182	122	83	141	97	120	93	118	117	107	161	378
ENSMUSG00000018425	130	166	205	186	103	166	197	205	196	102	170	159	220	146	253	229	222	183	281	196	269	451	267	168	270	203	182	213	201	159	157	170	86	151	164	139	177	202	212	267	214	172	164	84	163	203	243	244	88
ENSMUSG00000018427	354	218	467	230	408	302	253	220	455	423	447	292	517	643	644	504	714	527	674	414	407	406	434	316	236	321	415	262	246	341	218	380	421	293	403	359	268	305	400	344	404	378	369	342	417	454	593	493	213
ENSMUSG00000018428	1406	1115	1738	1123	996	688	784	758	908	1294	976	847	723	1443	1099	1081	812	1268	1910	1144	1251	1010	632	1041	767	940	933	667	776	634	729	1058	1368	1113	1733	1239	567	666	791	1422	688	760	1051	932	593	999	1145	834	796
ENSMUSG00000018433	78	162	72	339	122	40	253	32	175	300	108	253	16	186	60	365	191	162	103	216	76	120	162	72	27	35	55	172	146	94	59	88	69	215	120	107	141	4	125	155	54	119	70	72	165	16	143	140	822
ENSMUSG00000018442	120	67	96	92	135	98	96	81	107	106	127	168	173	154	128	192	135	143	125	185	129	156	116	148	99	95	75	114	98	86	62	67	85	73	83	135	110	89	108	134	182	115	84	95	134	134	117	103	84
ENSMUSG00000018446	773	788	701	745	358	731	644	422	687	726	1020	979	719	549	427	508	506	784	681	617	605	563	468	510	1502	1036	1192	819	1032	1546	843	757	534	715	790	525	732	690	845	678	1056	700	418	630	389	701	354	621	642
ENSMUSG00000018449	2	13	8	8	4	10	7	10	3	11	11	6	7	11	1	4	9	7	3	9	5	4	3	8	11	8	22	13	8	17	14	18	11	4	11	14	9	6	7	17	7	11	10	15	6	10	10	5	8
ENSMUSG00000018451	0	0	0	1	0	0	0	0	0	0	0	0	0	0	0	0	0	0	0	0	0	0	0	0	0	0	0	0	0	0	0	0	0	0	0	0	0	0	0	0	0	0	0	0	0	0	0	0	0
ENSMUSG00000018459	13	0	1	0	2	1	0	0	11	0	20	1	0	0	1	5	2	2	1	1	1	1	1	1	3	16	0	15	0	0	1	0	0	0	2	6	2	1	0	0	1	0	0	0	0	0	0	1	0
ENSMUSG00000018470	0	0	0	0	0	0	0	0	0	0	0	0	0	0	0	5	0	0	0	0	1	0	0	0	0	0	0	0	0	0	0	0	0	0	0	0	0	0	0	0	0	0	0	0	0	0	0	0	0
ENSMUSG00000018474	40	3	30	4	44	33	15	11	11	2	4	2	78	43	10	46	11	16	1	27	27	77	82	33	4	33	21	14	17	2	122	1	34	15	36	26	8	21	12	4	16	18	9	3	1	5	46	6	8
ENSMUSG00000018476	164	141	181	88	201	87	202	135	140	204	202	115	128	162	200	152	215	192	106	200	135	105	215	269	144	228	119	115	191	101	128	236	265	233	223	270	144	177	149	174	202	206	255	225	152	154	226	198	112
ENSMUSG00000018479	2	2	3	2	2	2	2	24	2	2	2	2	3	3	3	2	3	2	3	2	2	2	2	2	2	2	2	2	2	2	2	12	2	2	2	2	2	2	2	5	2	2	2	2	2	2	2	2	5
ENSMUSG00000018481	487	381	381	366	300	506	310	315	257	459	268	244	443	560	525	624	511	521	1117	400	423	546	445	381	230	370	432	356	298	440	282	282	227	280	293	376	322	229	392	418	309	345	430	292	366	613	397	322	868
ENSMUSG00000018486	0	0	0	0	0	0	0	0	0	0	0	0	0	0	0	0	0	0	0	0	0	0	0	0	0	0	0	0	0	0	0	0	0	0	0	0	0	0	0	0	0	0	0	0	0	0	0	0	0
ENSMUSG00000018500	1	14	1	39	1	14	0	16	0	10	15	1	1	2	11	1	1	1	0	14	0	2	1	33	0	0	0	11	0	1	1	5	1	19	10	1	42	1	36	0	23	1	31	7	4	1	0	7	35
ENSMUSG00000018501	2823	2072	2139	1941	1694	2264	1774	1860	1979	2174	2310	2470	1534	1435	2169	1777	1933	2171	2211	1350	2368	2138	1173	2565	1707	2623	2262	2023	2183	2603	1308	2708	2094	1625	2810	2254	1902	1598	1563	2446	1519	1587	1763	1812	1437	2266	2881	1903	865
ENSMUSG00000018507	18	23	14	28	72	54	89	189	17	14	13	237	33	42	16	305	140	10	168	8	7	97	13	76	8	119	24	9	10	15	9	66	10	14	38	15	252	79	12	473	100	11	30	56	10	126	17	11	51
ENSMUSG00000018509	332	381	272	302	301	242	278	240	222	244	385	230	247	175	177	295	310	261	252	215	138	141	142	167	293	380	296	316	319	369	237	333	299	212	282	291	125	165	132	142	234	191	194	219	147	146	164	145	284
ENSMUSG00000018537	0	0	0	0	0	1	0	0	0	0	0	0	0	0	0	0	0	0	0	0	0	0	0	0	0	0	0	0	0	0	0	0	1	0	0	0	0	0	0	0	0	0	0	0	0	0	0	0	0
ENSMUSG00000018541	693	411	784	940	1369	602	994	1190	917	1089	884	1023	1017	1069	1304	1000	829	941	720	1219	1307	1403	1796	1194	915	1201	1031	1024	886	794	1285	1010	1074	786	927	1083	1168	1476	1163	1449	1185	1250	1437	1335	902	1880	1422	1103	95
ENSMUSG00000018543	0	0	0	0	0	0	0	0	0	0	0	0	0	0	0	0	2	0	0	0	0	0	0	0	0	0	0	0	0	0	0	0	0	0	0	0	0	0	0	0	0	0	0	0	0	0	1	8	0
ENSMUSG00000018547	0	0	3	22	1	1	3	0	5	6	4	3	0	0	0	0	0	0	0	2	2	0	0	4	3	0	0	2	0	0	0	12	1	13	0	3	14	0	0	3	10	0	5	5	2	0	1	1	0
ENSMUSG00000018548	695	611	481	571	556	644	593	592	596	688	538	818	599	807	481	742	595	723	919	568	510	748	793	518	682	501	801	836	543	590	357	546	481	439	406	352	558	540	466	401	774	411	492	422	556	469	452	482	536
ENSMUSG00000018554	446	291	281	219	251	147	268	129	178	183	328	188	341	303	477	365	393	535	369	323	227	347	392	363	216	422	251	235	276	305	269	292	236	262	298	289	232	342	244	298	422	430	383	424	338	191	198	229	991
ENSMUSG00000018559	100	97	154	197	224	121	133	74	117	103	65	122	163	282	188	271	154	96	207	123	295	312	121	119	118	122	126	169	152	49	162	91	115	112	99	125	265	243	212	230	241	232	261	139	174	228	244	263	138
ENSMUSG00000018565	1403	958	1016	839	1014	860	1015	1237	1022	865	1243	1179	1706	989	1526	1254	852	1257	1738	1179	1521	1166	1115	1175	1363	1086	1115	1037	1243	846	1309	882	1048	497	746	798	1362	1501	1598	1006	1203	1236	973	983	1328	825	1183	1202	846
ENSMUSG00000018566	1	0	0	1	0	2	2	0	0	0	0	0	0	0	0	0	6	3	0	0	0	0	1	10	0	0	0	0	0	0	0	0	0	0	0	0	0	1	0	0	0	0	5	0	5	0	0	3	9
ENSMUSG00000018567	62	39	20	2	35	14	17	15	56	26	23	32	21	12	19	73	12	67	36	14	1	25	60	50	44	21	31	39	53	13	27	30	44	15	106	15	46	94	20	73	8	39	29	1	73	51	13	4	150
ENSMUSG00000018569	0	21	7	45	1	27	13	7	3	0	15	43	18	40	22	9	13	52	22	13	17	0	0	17	18	4	9	21	5	1	8	18	7	30	1	13	31	5	14	5	17	2	23	7	43	0	1	5	7
ENSMUSG00000018570	0	0	0	0	0	1	0	1	0	0	0	0	3	0	0	0	0	0	0	7	1	0	0	0	0	0	0	0	1	0	0	0	0	0	0	0	0	0	0	0	1	0	0	0	0	0	0	0	0
ENSMUSG00000018572	2197	2633	1321	2117	3210	2173	3218	2857	3081	3240	3070	3238	1703	1747	1748	1703	1992	1789	1261	2530	1692	2586	2746	2491	3450	3299	3370	4645	4527	3623	4434	4515	3643	3378	2969	3223	3696	3201	3322	2640	3509	2368	2963	3831	2980	2738	2438	2888	1214
ENSMUSG00000018574	0	0	0	0	0	9	2	0	0	0	0	8	0	3	0	0	4	2	1	0	0	0	2	0	12	0	7	4	8	0	0	2	0	0	0	0	10	3	0	4	0	0	0	3	0	0	0	2	0
ENSMUSG00000018581	150	76	107	66	100	108	74	192	77	113	73	98	132	129	82	157	138	154	108	72	127	183	143	73	40	51	56	47	89	61	132	40	56	104	40	34	96	131	116	91	81	96	110	56	110	96	93	87	106
ENSMUSG00000018583	636	801	777	782	799	531	678	647	586	537	1020	667	1126	715	672	713	631	775	609	646	1016	586	858	535	525	727	530	415	647	727	585	705	880	830	868	1083	541	847	724	872	656	643	599	672	610	668	748	626	834
ENSMUSG00000018585	123	157	58	189	221	308	196	209	143	239	222	126	130	140	73	133	127	126	174	217	283	104	134	234	179	130	142	283	356	171	240	285	286	101	245	120	277	279	337	285	133	223	287	269	163	283	276	338	45
ENSMUSG00000018589	0	0	0	0	0	0	10	0	0	0	0	0	0	0	0	0	0	0	0	0	0	0	0	0	0	0	0	0	0	10	1	0	0	0	0	0	0	0	8	0	0	0	3	2	0	0	0	0	0
ENSMUSG00000018593	14	5	67	11	119	23	18	15	47	29	8	32	93	11	11	78	47	195	7	31	65	10	14	6	4	31	18	26	71	9	11	9	77	37	85	95	268	20	6	107	3	11	80	65	50	100	36	14	15
ENSMUSG00000018595	0	3	2	9	4	0	0	4	3	1	6	0	2	2	0	0	11	6	10	1	2	8	10	9	4	2	2	8	3	4	0	3	2	0	1	7	3	2	2	0	2	1	1	0	2	0	1	5	6
ENSMUSG00000018599	3	3	2	3	2	1	2	2	3	2	2	2	3	3	2	2	2	2	2	2	2	2	2	2	3	2	3	2	3	2	2	2	2	2	2	2	2	2	2	2	2	2	2	2	2	2	2	2	0
ENSMUSG00000018604	328	175	180	367	339	388	438	202	333	292	376	291	253	162	134	275	438	227	112	244	297	249	308	336	218	220	238	367	300	311	346	348	233	477	264	423	269	210	234	318	317	173	353	395	223	535	227	347	160
ENSMUSG00000018620	0	0	0	3	0	2	0	0	0	0	0	0	0	0	0	0	2	0	0	0	0	0	0	0	0	0	0	0	0	0	0	0	13	0	0	2	0	0	0	0	0	5	0	0	0	0	0	0	0
ENSMUSG00000018634	0	0	0	0	0	0	0	0	0	0	0	0	0	0	0	0	0	0	0	0	0	0	0	0	0	0	0	0	0	0	0	0	0	0	0	0	0	0	0	0	0	0	0	0	0	0	0	0	0
ENSMUSG00000018648	6689	8239	6949	9626	8845	6417	7431	7605	7701	7399	7070	7267	5781	6362	6304	6279	6991	7612	4810	6907	5982	5171	5938	7798	8015	7389	8349	9288	10320	5900	8034	7272	10956	7051	7141	7672	6650	9349	6155	6113	6724	4686	6395	8749	5520	6411	5776	4909	5024
ENSMUSG00000018651	1155	2411	1333	1730	1570	1479	1316	1256	1073	1699	1199	2260	1044	1029	1101	1118	955	1177	830	1389	1802	1037	848	1578	1099	730	686	1712	1328	1378	1116	1769	1822	1531	1750	1696	1087	1043	1052	1632	833	1001	1640	1417	655	1546	1168	755	174
ENSMUSG00000018654	1	0	0	0	0	0	0	0	0	0	0	0	0	0	0	1	0	0	0	0	0	0	0	0	0	0	0	0	0	0	0	0	0	0	0	0	0	0	0	0	0	0	0	0	0	0	0	0	0
ENSMUSG00000018656	0	0	0	0	0	1	0	0	0	1	0	7	0	0	0	0	0	0	0	0	0	0	0	0	0	0	0	2	0	3	0	0	0	0	1	0	0	0	0	0	1	0	0	2	2	1	0	3	0
ENSMUSG00000018659	81	55	9	5	25	33	85	40	25	26	36	14	24	33	25	9	53	27	50	31	19	7	14	71	36	17	28	105	32	29	44	47	18	125	44	9	130	57	26	13	35	13	13	47	30	35	30	40	33
ENSMUSG00000018661	10	7	7	12	16	14	9	10	13	18	24	16	15	17	6	13	3	5	16	4	9	4	6	8	22	11	8	35	36	5	12	18	12	4	4	18	35	29	15	28	20	10	16	21	16	8	15	15	31
ENSMUSG00000018666	326	335	284	281	234	350	288	349	321	327	324	371	253	232	222	280	207	252	249	228	369	141	241	206	327	286	325	339	297	292	290	402	271	389	300	344	282	222	270	367	213	274	313	311	159	293	320	329	106
ENSMUSG00000018669	546	837	791	39	34	493	354	400	12	23	32	42	30	132	57	1319	484	33	43	97	147	45	830	149	253	283	201	148	107	36	33	20	286	943	318	20	397	283	24	265	335	17	51	180	387	53	213	33	0
ENSMUSG00000018672	23	14	14	5	4	3	17	7	21	5	16	21	1	1	3	0	22	4	10	3	1	12	5	1	55	38	15	8	21	24	16	0	13	11	20	38	24	6	23	6	21	17	6	14	27	8	0	6	12
ENSMUSG00000018677	298	214	367	242	506	234	347	337	354	259	434	191	526	326	418	357	406	420	190	540	262	282	372	557	305	353	236	342	339	204	447	517	698	581	369	677	355	343	289	387	493	396	444	735	493	327	380	251	171
ENSMUSG00000018678	129	74	109	171	157	89	173	67	134	239	198	105	113	147	138	49	124	86	82	137	156	110	95	153	113	182	114	128	300	178	184	159	116	191	94	150	138	196	89	109	162	119	189	117	138	107	91	169	81
ENSMUSG00000018697	79	98	174	250	166	99	158	133	172	186	72	181	155	240	290	164	213	159	273	185	157	39	264	182	100	77	99	224	98	83	48	121	79	74	96	128	84	112	119	111	157	74	126	233	95	78	43	131	82
ENSMUSG00000018698	0	0	0	0	0	1	0	0	0	0	0	0	0	0	0	0	4	3	1	1	1	1	1	0	1	1	1	0	0	0	0	0	0	0	0	0	0	1	0	0	1	1	1	1	1	0	0	0	0
ENSMUSG00000018707	6	109	77	228	3	30	50	5	62	25	153	37	8	240	149	86	172	102	112	193	59	92	72	96	153	97	64	115	128	75	22	45	50	4	235	41	87	228	91	128	56	129	51	120	220	158	134	74	67
ENSMUSG00000018727	39	27	71	102	62	78	68	39	56	52	98	71	141	112	46	60	94	94	74	68	82	104	77	59	45	50	42	72	55	50	54	62	106	93	63	24	95	91	58	52	81	84	90	116	84	61	80	97	321
ENSMUSG00000018733	74	68	48	83	62	40	92	95	51	70	69	55	60	57	47	32	50	66	45	63	48	78	73	38	78	65	37	76	67	76	94	38	83	56	42	44	95	55	56	42	46	45	49	50	43	52	27	37	105
ENSMUSG00000018736	312	314	138	316	237	206	253	186	143	198	201	269	162	214	152	157	178	260	278	129	144	202	209	227	221	278	300	472	305	233	292	187	236	219	142	222	304	398	189	386	570	494	519	361	445	297	432	406	493
ENSMUSG00000018740	44	26	27	3	19	23	18	20	16	10	38	3	20	105	54	49	23	23	22	17	31	23	79	36	15	16	8	25	27	81	15	35	47	0	37	42	10	37	13	61	54	51	68	43	109	17	63	6	18
ENSMUSG00000018750	0	0	0	0	0	0	0	0	0	0	0	0	0	0	0	0	3	3	0	0	0	0	0	0	0	0	0	0	0	0	0	0	0	0	0	0	0	0	0	0	0	0	0	0	0	0	0	0	0
ENSMUSG00000018752	0	0	0	0	0	0	0	0	0	0	0	2	0	0	0	0	0	0	0	0	0	0	0	0	0	0	0	0	0	0	0	0	0	0	0	3	0	0	0	0	0	0	0	0	0	0	0	0	0
ENSMUSG00000018761	13	8	40	10	7	19	8	7	7	6	6	7	9	8	5	4	56	36	3	5	4	6	8	7	60	8	9	11	39	7	10	5	38	6	4	5	8	10	6	5	16	7	5	8	40	7	5	4	2
ENSMUSG00000018765	221	176	207	74	74	63	106	45	92	42	137	49	80	318	208	191	131	317	176	178	243	183	135	98	83	110	65	82	26	72	76	84	135	106	85	9	177	166	188	169	159	296	192	101	153	73	143	108	250
ENSMUSG00000018770	109	277	80	177	117	119	74	72	29	96	208	129	178	32	43	169	52	71	46	138	127	116	159	92	177	150	95	108	85	180	133	137	26	124	208	165	139	148	53	143	102	110	70	49	130	118	111	88	64
ENSMUSG00000018774	3	3	3	9	3	5	6	11	0	2	8	10	7	3	6	3	2	8	5	14	1	1	15	7	15	19	20	5	47	8	13	8	15	4	7	8	10	24	15	2	3	7	17	42	30	9	2	14	27
ENSMUSG00000018776	0	0	0	0	0	0	0	0	0	0	0	0	0	0	0	0	0	0	0	0	0	0	0	0	0	0	0	0	0	0	0	0	0	0	0	0	0	0	0	0	0	0	0	0	0	0	0	0	0
ENSMUSG00000018796	161	226	236	244	199	196	140	139	192	149	148	130	272	205	254	192	274	365	232	241	220	227	237	246	91	128	100	112	98	111	126	101	124	159	176	154	230	144	185	160	187	201	182	101	216	168	120	182	208
ENSMUSG00000018800	32	10	16	27	10	8	21	14	19	11	15	11	6	24	12	5	16	11	16	13	18	6	6	14	10	17	6	14	3	13	3	8	16	10	23	16	5	3	8	6	7	4	8	11	10	3	7	6	0
ENSMUSG00000018809	124	165	247	95	124	142	147	99	175	138	141	111	106	169	169	103	111	254	151	169	145	159	134	115	152	128	77	105	105	102	138	62	144	82	144	125	136	105	139	163	123	91	145	140	57	318	155	102	129
ENSMUSG00000018819	989	530	542	953	661	692	914	783	766	738	820	764	1146	571	873	826	829	747	1117	972	698	598	690	640	1301	893	980	1288	796	719	842	705	938	804	784	707	695	1093	1141	819	1217	868	757	1306	882	1180	819	1048	479
ENSMUSG00000018820	4	2	2	3	4	3	3	2	22	3	3	4	2	2	4	4	4	3	5	4	3	12	7	4	3	2	2	4	3	3	5	3	3	20	16	3	5	8	3	52	4	3	3	4	3	2	2	4	1
ENSMUSG00000018821	232	542	401	35	131	73	334	240	33	204	535	45	302	282	27	345	341	237	530	93	148	513	15	129	330	119	67	104	356	22	34	418	133	172	82	315	92	550	14	201	179	83	77	160	144	13	246	383	58
ENSMUSG00000018822	0	0	0	0	0	0	0	0	0	0	0	0	0	0	0	0	0	0	0	0	0	0	6	1	0	0	0	0	0	0	0	0	0	0	0	0	4	0	3	0	0	0	1	0	0	0	0	0	0
ENSMUSG00000018830	354	237	312	154	279	300	300	251	331	299	261	202	419	382	357	493	334	335	367	463	313	395	289	308	480	309	390	255	166	303	272	229	284	360	224	333	343	533	377	608	457	518	514	392	364	493	479	253	28
ENSMUSG00000018841	67	34	212	110	49	63	112	118	106	77	121	31	178	154	106	118	74	182	238	124	98	235	305	97	65	37	38	37	58	101	35	67	99	178	68	109	184	61	103	195	158	134	91	92	51	168	262	33	48
ENSMUSG00000018844	0	0	0	0	0	0	0	0	0	0	0	0	0	0	0	0	2	2	0	0	0	0	0	0	0	0	0	0	0	0	0	0	0	0	0	0	0	0	0	0	0	0	0	0	0	0	0	0	0
ENSMUSG00000018845	1	1	2	1	2	2	1	1	1	1	2	2	1	1	2	2	2	2	3	2	2	2	3	2	1	1	1	1	1	1	2	1	2	1	1	1	2	2	1	1	2	2	2	2	1	1	1	2	0
ENSMUSG00000018846	553	382	270	239	508	314	373	172	229	381	448	579	939	645	801	692	934	1016	1460	809	520	508	206	701	323	196	203	145	180	542	204	336	315	243	403	152	274	220	275	388	704	300	839	395	916	573	692	487	2919
ENSMUSG00000018848	338	158	98	599	290	296	172	175	258	171	270	166	373	292	200	185	187	153	268	300	255	367	271	244	418	208	194	198	116	297	290	232	88	319	279	130	557	457	158	311	339	625	295	406	334	245	292	233	381
ENSMUSG00000018849	168	339	375	117	297	225	211	226	318	248	388	199	198	237	241	176	136	209	167	218	279	258	142	230	165	195	153	157	215	209	306	242	216	214	264	260	163	97	403	260	157	146	62	159	131	80	125	119	142
ENSMUSG00000018858	2	71	26	22	23	24	10	7	15	1	16	8	9	3	3	1	1	5	7	15	3	17	17	1	26	5	20	17	5	7	16	0	17	0	6	25	17	6	43	17	9	8	8	12	13	1	20	15	6
ENSMUSG00000018861	11	8	36	15	6	36	4	5	14	6	8	9	14	20	12	28	10	7	6	5	52	6	5	28	28	13	2	4	3	9	36	5	123	163	4	6	6	6	6	4	1	22	28	14	22	5	5	7	0
ENSMUSG00000018862	0	0	0	0	0	0	0	0	0	0	0	0	0	0	0	0	0	0	0	0	0	0	0	0	0	0	0	0	0	0	0	0	0	0	0	0	0	0	0	0	0	0	0	0	0	0	0	0	0
ENSMUSG00000018865	160	102	145	150	166	110	167	135	161	104	179	201	150	168	146	87	179	113	129	97	159	182	188	109	280	229	350	259	234	146	258	242	307	145	155	189	277	216	208	214	206	262	112	190	212	208	97	274	167
ENSMUSG00000018868	0	0	0	0	0	0	0	0	0	0	0	0	0	0	2	0	0	0	0	0	0	1	0	0	0	2	0	0	0	0	0	0	0	0	0	0	0	3	0	0	0	0	0	1	2	0	0	6	0
ENSMUSG00000018882	1407	1007	1145	1436	1557	1047	1091	1590	1176	1704	1235	1024	946	1023	1025	1183	1222	762	1014	1110	1333	746	578	1390	1245	1652	1236	1698	1433	1275	850	1624	2244	1785	2018	1841	1300	1362	1845	1996	1055	1381	1410	1909	802	1696	1505	1113	310
ENSMUSG00000018893	6	1	1	20	12	5	1	3	9	2	1	13	0	1	1	1	1	4	1	0	6	1	0	8	11	10	0	15	0	18	0	3	0	0	2	0	6	2	4	9	23	3	0	6	1	11	11	0	20
ENSMUSG00000018899	14	1	36	64	24	31	14	6	7	28	20	29	37	1	4	4	13	6	0	8	7	7	3	3	12	25	2	3	4	34	39	47	15	43	6	5	16	0	2	28	6	16	75	13	51	0	18	20	240
ENSMUSG00000018900	89	212	174	194	115	97	173	111	136	127	121	146	99	164	123	147	192	167	117	152	107	129	118	182	96	76	88	121	166	122	121	77	119	132	73	117	66	95	72	68	95	103	91	78	73	90	66	101	123
ENSMUSG00000018906	8	194	19	756	37	114	40	66	35	86	35	107	13	14	66	144	21	46	8	45	95	72	86	9	5	79	100	21	171	47	125	155	14	54	5	6	80	77	59	11	26	37	16	99	186	190	104	8	77
ENSMUSG00000018907	2	2	4	2	3	3	2	2	2	3	3	3	2	3	4	4	4	4	4	3	3	3	3	3	1	2	2	2	1	3	2	3	3	3	3	3	3	2	3	3	2	2	3	2	2	3	3	4	1
ENSMUSG00000018909	3	2	1	2	2	1	2	2	2	2	2	2	2	2	2	2	2	6	2	2	2	3	3	2	2	2	2	3	3	2	3	2	2	2	1	2	3	4	2	1	2	2	2	2	2	2	1	4	1
ENSMUSG00000018914	12	4	1	0	8	4	0	0	7	10	8	5	3	7	0	8	5	1	0	4	3	4	6	14	0	0	6	7	0	8	0	2	2	0	4	1	1	1	5	17	7	0	6	1	11	3	0	16	0
ENSMUSG00000018919	0	0	0	0	0	0	0	0	0	0	0	0	0	0	0	0	0	0	0	0	0	0	0	0	0	0	0	0	0	0	0	0	0	0	0	0	0	0	0	0	0	0	0	0	1	0	0	1	0
ENSMUSG00000018920	43	46	40	51	40	84	40	42	44	45	44	48	54	63	56	42	40	36	42	40	37	45	39	42	34	37	40	39	36	44	38	200	36	43	35	44	44	35	41	42	32	37	37	36	41	47	49	42	64
ENSMUSG00000018921	523	321	268	399	373	252	393	625	417	433	586	251	317	235	258	383	265	236	203	604	263	296	393	329	562	433	461	632	1033	705	426	394	704	351	448	378	588	615	466	493	667	275	329	540	481	397	280	400	140
ENSMUSG00000018923	814	862	705	639	895	809	1129	1135	1054	1217	1282	1086	1123	923	1254	894	1083	971	940	1223	836	751	744	1367	680	599	721	818	1031	762	780	1006	1079	1014	687	951	836	699	957	1036	310	730	926	1169	505	812	974	854	128
ENSMUSG00000018924	0	0	1	0	1	1	0	0	0	1	1	1	0	0	1	1	1	1	1	1	1	1	1	1	0	0	3	1	0	1	1	1	1	1	1	1	1	1	1	1	1	1	1	1	1	20	1	1	0
ENSMUSG00000018925	0	0	0	0	0	0	0	0	0	0	0	0	0	0	0	0	0	0	0	0	0	0	0	0	0	0	0	0	0	0	0	0	0	0	0	0	0	0	0	0	0	0	0	0	0	0	0	0	0
ENSMUSG00000018927	0	0	0	12	0	0	0	0	0	4	0	0	0	0	0	6	6	0	0	0	0	0	0	0	14	3	0	0	0	1	0	0	9	0	0	0	0	4	11	0	10	9	7	0	0	0	0	0	6
ENSMUSG00000018930	1	0	0	0	0	0	0	0	2	0	2	0	3	5	3	2	0	2	2	4	2	1	3	4	0	2	0	0	0	2	0	1	0	1	0	2	3	4	4	2	7	5	7	1	2	3	5	11	0
ENSMUSG00000018931	1195	999	771	823	1043	942	982	962	969	662	969	1408	727	761	794	605	765	825	388	687	683	908	873	956	1277	1038	1221	1551	1381	837	2106	1167	1357	1073	1050	1050	906	1040	1375	808	1613	1165	1239	1322	1607	900	823	644	581
ENSMUSG00000018932	9	74	130	9	7	5	6	64	36	75	16	8	8	10	9	52	16	170	7	23	5	8	18	21	5	9	4	30	230	8	8	6	6	102	56	6	7	9	6	63	5	4	5	5	5	6	19	7	315
ENSMUSG00000018965	102	61	119	56	27	59	61	61	71	57	58	54	34	79	71	29	38	68	41	66	31	58	30	48	99	108	100	103	119	113	69	108	95	86	81	103	82	87	82	44	131	104	89	92	77	40	73	37	177
ENSMUSG00000018973	16	2	30	26	29	2	9	2	14	2	7	3	3	4	4	3	8	7	3	3	16	3	7	2	3	27	5	23	4	3	3	2	2	2	4	8	3	3	81	2	10	8	26	2	8	2	39	3	0
ENSMUSG00000018974	801	1109	954	1061	1238	834	1209	935	1215	1112	901	686	821	889	739	722	822	1178	733	892	921	783	924	945	1519	1657	1737	1432	1688	1197	1336	1326	1697	1273	1421	1464	1344	1407	1292	1363	1407	1315	1380	1627	1083	1092	1304	1417	140
ENSMUSG00000018983	392	400	526	422	266	421	322	429	472	520	276	228	475	350	815	568	337	681	849	419	612	725	246	640	331	508	416	211	387	295	266	487	626	545	530	379	917	585	514	597	281	400	461	726	415	1030	581	758	154
ENSMUSG00000018986	0	0	0	0	0	0	0	0	0	0	0	0	0	0	0	0	0	0	0	0	0	0	0	0	0	0	0	0	0	0	0	0	0	0	1	0	0	0	0	0	0	0	0	0	0	0	0	0	0
ENSMUSG00000018995	0	0	1	0	0	2	2	0	0	3	0	0	7	0	0	0	0	0	0	0	0	2	0	0	0	0	0	1	1	4	0	0	0	0	1	0	3	0	6	0	0	0	0	2	0	0	0	0	0
ENSMUSG00000018999	178	277	148	220	223	183	183	113	122	149	165	201	180	172	244	172	254	197	198	108	165	159	135	173	225	149	142	143	169	198	191	162	116	83	171	164	164	133	184	201	378	273	293	157	411	167	265	139	459
ENSMUSG00000019027	0	0	0	0	0	0	0	0	0	0	0	0	4	0	0	0	2	9	1	0	0	0	0	1	0	0	0	0	0	0	0	0	0	0	0	0	0	0	0	0	0	1	0	0	0	0	0	0	0
ENSMUSG00000019039	87	181	254	13	93	76	3	131	39	68	47	60	22	132	48	101	68	40	64	56	40	10	241	152	61	32	29	17	31	10	8	5	68	4	4	5	7	12	312	30	33	63	64	3	31	61	85	172	7
ENSMUSG00000019054	201	32	50	41	104	159	261	187	185	134	239	61	216	45	93	7	142	157	100	75	119	57	49	91	208	227	233	257	286	241	202	155	184	213	172	191	253	358	173	125	86	111	96	319	134	133	182	171	78
ENSMUSG00000019055	77	156	104	10	64	10	104	11	5	4	61	15	83	79	73	83	139	41	33	19	42	55	36	48	148	118	109	89	201	132	61	90	82	63	83	176	3	61	47	23	68	110	41	20	118	5	70	83	7
ENSMUSG00000019066	2904	3620	3390	3292	3832	4051	3257	3642	3259	3277	3366	3020	1781	2099	2012	3067	2122	2560	1121	2424	2087	2340	2110	2685	3549	2895	3104	4013	4189	2842	4668	3631	4960	3897	2762	3587	2346	2808	2830	3048	2693	2346	2239	2894	2429	3147	2134	1495	827
ENSMUSG00000019080	0	1	1	0	0	0	0	1	1	0	0	0	0	1	0	0	0	0	0	0	0	2	0	0	0	1	1	12	1	0	0	0	0	0	1	0	0	0	0	0	0	0	0	0	0	1	1	11	0
ENSMUSG00000019082	60	21	29	16	27	24	41	33	23	38	30	45	35	32	41	31	29	32	18	20	32	32	52	33	18	38	17	22	33	18	15	23	18	23	26	12	20	23	29	28	59	40	34	13	33	17	21	23	6
ENSMUSG00000019087	69	101	75	113	90	69	135	85	93	92	33	50	118	88	66	54	87	101	48	171	113	77	104	108	132	113	130	129	161	76	149	106	111	72	59	66	94	241	85	44	121	144	113	211	161	175	71	117	53
ENSMUSG00000019088	0	0	0	0	5	0	0	0	0	0	6	0	0	0	0	0	1	0	0	0	0	0	7	0	0	1	1	0	0	1	0	0	0	0	0	0	2	2	0	0	0	2	0	0	0	1	0	0	0
ENSMUSG00000019102	0	0	0	1	0	2	0	0	0	0	0	0	0	1	1	0	4	0	0	0	0	0	0	0	0	4	7	0	0	0	0	1	0	0	0	0	0	0	11	1	0	0	0	0	12	0	0	0	1
ENSMUSG00000019124	0	0	0	0	0	0	6	0	0	0	0	7	0	0	0	0	0	0	0	1	0	0	0	0	0	0	0	0	0	3	0	0	0	0	0	0	0	0	0	3	0	2	0	0	0	0	0	0	0
ENSMUSG00000019132	208	241	214	195	174	189	242	163	277	159	207	152	375	417	453	320	377	502	602	429	280	316	321	363	186	254	171	165	207	149	224	201	131	199	186	254	140	394	260	139	270	258	245	271	287	300	254	295	366
ENSMUSG00000019139	194	106	73	49	22	349	458	364	141	15	13	113	18	1158	574	123	266	377	131	220	1218	306	144	64	518	99	302	244	130	535	289	208	427	608	491	15	184	296	797	112	712	509	12	125	85	355	349	200	37
ENSMUSG00000019143	1	1	0	0	1	1	1	1	1	1	1	1	0	3	1	1	5	4	1	1	1	1	1	1	1	1	1	1	1	1	1	1	1	1	1	1	1	1	1	1	2	2	1	1	1	3	1	1	9
ENSMUSG00000019158	1	1	5	1	1	0	0	1	0	1	1	1	1	1	1	1	2	0	0	0	0	1	1	0	6	0	0	1	1	1	1	0	1	1	0	1	1	1	1	0	0	8	0	0	0	1	0	1	0
ENSMUSG00000019173	67	108	152	72	72	67	88	65	78	61	74	95	74	136	92	65	75	100	93	81	64	94	75	77	105	72	62	93	67	60	74	77	79	111	69	85	110	125	132	118	148	118	133	91	126	100	95	92	291
ENSMUSG00000019178	1	1	0	1	0	0	3	0	0	0	1	1	1	1	1	0	0	0	3	3	9	0	0	3	0	0	0	0	0	1	1	0	0	0	3	0	0	0	3	1	2	1	0	0	0	0	0	2	11
ENSMUSG00000019179	18	208	315	251	5	42	96	100	132	6	138	255	470	22	294	209	83	259	300	129	76	314	43	190	120	159	77	198	9	115	108	57	212	91	124	6	107	220	6	64	71	96	86	26	128	17	188	46	436
ENSMUSG00000019188	150	171	149	183	229	143	127	121	136	175	218	168	163	133	144	83	172	196	169	140	103	102	107	169	158	241	138	230	236	175	262	181	234	164	173	203	224	170	143	168	176	171	163	230	163	192	185	180	215
ENSMUSG00000019189	246	294	398	265	449	440	446	358	388	396	360	290	293	319	196	227	198	267	131	397	454	362	270	284	334	347	276	337	390	300	323	337	377	226	255	257	288	365	288	326	215	227	315	318	338	331	358	490	97
ENSMUSG00000019194	0	0	0	0	0	0	0	0	0	0	0	0	0	0	0	0	0	0	0	0	0	0	0	0	0	0	0	0	0	0	0	0	0	0	0	0	0	0	0	0	0	2	0	3	0	0	0	0	0
ENSMUSG00000019210	181	64	34	169	144	274	173	155	162	129	166	180	97	63	111	57	52	45	76	103	88	61	97	105	229	246	315	252	298	257	170	140	107	154	131	174	114	170	160	142	49	116	119	129	65	177	68	202	343
ENSMUSG00000019214	10	60	8	10	10	7	95	13	5	8	10	11	9	10	13	11	11	9	12	10	34	12	13	8	6	4	4	9	119	10	10	7	8	7	12	7	201	14	8	6	74	17	47	7	6	30	6	20	0
ENSMUSG00000019230	0	0	0	12	0	2	4	4	0	7	0	11	0	0	0	0	3	1	1	0	0	0	0	4	9	0	3	0	5	0	0	0	0	0	19	11	0	0	0	0	0	0	0	0	0	0	0	1	0
ENSMUSG00000019232	0	0	6	0	0	3	0	0	0	0	9	0	1	0	2	0	0	1	0	1	2	0	0	0	2	0	1	0	0	0	0	5	0	0	0	0	3	0	0	0	0	0	0	1	0	0	3	0	3
ENSMUSG00000019235	0	0	0	0	2	1	0	0	0	1	0	1	0	0	0	0	0	1	0	0	0	0	2	0	0	2	4	0	0	0	0	0	0	0	0	0	0	1	2	0	0	0	0	0	0	0	0	0	0
ENSMUSG00000019254	8	7	3	7	5	3	89	87	6	133	12	39	8	8	83	4	33	8	12	103	45	29	12	18	109	6	6	22	85	130	13	49	5	123	4	5	40	31	18	11	16	5	42	180	44	151	5	20	64
[truncated: 26,157 more rows]
[truncated: 17 more columns]
