# Supplementary material for: Stella modulates transcriptional and endogenous retrovirus programs during maternal-to-zygotic transition
Source: eLife journal article supplement (doi:10.7554/elife.22345), 2017-03-21
Supplement: supp [file elife-22345-supp-v1.zip › elife_poa_e22345_Figure_1_source_data_2.xlsx]

## Sheet: Differentially expressed genes
Figure 1 – source data 2. List of differentially expressed genes between WT and KO samples at oocyte, 1-cell and 2-cell stage, from single cell / embryo RNA-seq analysis. ENSEMBL ID and names of genes identified as significantly differentially expressed with adjusted P-value <0.05. Log2FoldChange=Log2(WT/KO). Stage indicates which developmental stage is analysed.
ENSEMBL ID	Associated Gene Name	baseMean	log2FoldChange	Adjusted P-value	Stage
ENSMUSG00000046323	Dppa3	12418.1	5.99124	0	Oocyte
ENSMUSG00000080241	Dppa3-ps	444.262	8.36057	3.74735e-179	Oocyte
ENSMUSG00000085202	Gm15620	308.8	5.36667	1.15578e-165	Oocyte
ENSMUSG00000026596	Abl2	4927.84	-1.18505	1.30454e-126	Oocyte
ENSMUSG00000020257	Wdr82	1152.48	-0.879628	8.90634e-27	Oocyte
ENSMUSG00000030878	Cdr2	3190.35	0.978487	1.23508e-26	Oocyte
ENSMUSG00000000544	Gpa33	12.7214	3.91338	7.43359e-26	Oocyte
ENSMUSG00000029086	Prom1	84.9819	-2.07607	4.14255e-24	Oocyte
ENSMUSG00000032261	Sh3bgrl2	244.355	1.19893	5.95492e-24	Oocyte
ENSMUSG00000026640	Plxna2	384.687	-1.35423	1.57441e-23	Oocyte
ENSMUSG00000000730	Dnmt3l	695.443	-1.55076	8.06329e-22	Oocyte
ENSMUSG00000026715	Serpinc1	401.148	-1.38015	1.01979e-21	Oocyte
ENSMUSG00000024400	Wdr33	1135.62	0.719802	1.30744e-21	Oocyte
ENSMUSG00000028032	Papss1	345.136	0.867597	4.26671e-19	Oocyte
ENSMUSG00000029330	Cds1	1103.48	-0.772573	3.25834e-18	Oocyte
ENSMUSG00000021536	Adcy2	348.47	-1.98082	1.29315e-17	Oocyte
ENSMUSG00000045036	Tmem232	427.916	1.01178	3.05865e-17	Oocyte
ENSMUSG00000025921	Rdh10	1267.04	-1.00079	3.45739e-17	Oocyte
ENSMUSG00000034101	Ctnnd1	138.896	1.18303	9.06909e-17	Oocyte
ENSMUSG00000098197	BC051537	21.8436	2.67337	1.36625e-16	Oocyte
ENSMUSG00000028163	Nfkb1	68.0215	0.995611	2.54302e-16	Oocyte
ENSMUSG00000100553	Gm17751	201.175	-1.91188	2.54302e-16	Oocyte
ENSMUSG00000025666	Tmem47	79.1443	3.36765	1.6842e-15	Oocyte
ENSMUSG00000015721	Nlrp5	2424.5	-1.19166	2.32108e-15	Oocyte
ENSMUSG00000024743	Syt7	464.133	1.6301	2.66916e-15	Oocyte
ENSMUSG00000025949	Pikfyve	259.042	-0.902645	3.08772e-15	Oocyte
ENSMUSG00000020231	Dip2a	301.599	1.17758	3.69446e-15	Oocyte
ENSMUSG00000031604	Msmo1	116.932	-1.86747	5.80686e-15	Oocyte
ENSMUSG00000038375	Trp53inp2	448.788	-1.43755	6.07315e-15	Oocyte
ENSMUSG00000079215	Zfp664	2317.67	0.766329	6.83188e-15	Oocyte
ENSMUSG00000026721	Rabgap1l	76.8981	-1.24014	9.05933e-15	Oocyte
ENSMUSG00000003226	Ranbp2	730.233	-0.763451	1.07993e-14	Oocyte
ENSMUSG00000003032	Klf4	742.891	-1.61695	2.71214e-14	Oocyte
ENSMUSG00000021395	Spin1	34077.5	0.491262	1.44443e-13	Oocyte
ENSMUSG00000028121	Bcar3	510.579	1.14405	1.49159e-13	Oocyte
ENSMUSG00000045291	E330021D16Rik	4662.57	0.887302	2.31453e-13	Oocyte
ENSMUSG00000019932	Kera	57.9273	-2.62141	3.0003e-13	Oocyte
ENSMUSG00000032058	Ppp2r1b	229.382	1.13148	3.91923e-13	Oocyte
ENSMUSG00000024206	Rfx2	205.321	-1.23534	5.78267e-13	Oocyte
ENSMUSG00000035189	Ano4	65.1042	-3.1125	9.50262e-13	Oocyte
ENSMUSG00000041596	Nlrp5-ps	66.7997	-1.2248	1.1116e-12	Oocyte
ENSMUSG00000037072	Selenof	1351.61	0.626749	1.20247e-12	Oocyte
ENSMUSG00000091002	Tcerg1l	171.37	-1.25311	1.27444e-12	Oocyte
ENSMUSG00000024180	Tmem8	431.916	-1.41453	1.5407e-12	Oocyte
ENSMUSG00000035285	Nat14	249.561	1.15938	1.60062e-12	Oocyte
ENSMUSG00000019132	BC005537	300.386	-0.979723	2.69264e-12	Oocyte
ENSMUSG00000028222	Calb1	51.7956	-1.36446	3.02723e-12	Oocyte
ENSMUSG00000021814	Anxa7	12419.4	0.535509	3.99597e-12	Oocyte
ENSMUSG00000033499	Larp4b	2573.12	-0.607236	3.99597e-12	Oocyte
ENSMUSG00000047976	Kcna1	245.49	-1.84299	3.99597e-12	Oocyte
ENSMUSG00000025366	Esyt1	642.242	-0.927075	5.01005e-12	Oocyte
ENSMUSG00000070617	Gm13089	82.8078	-1.38467	5.33693e-12	Oocyte
ENSMUSG00000039693	Msantd3	204.647	0.825682	6.00654e-12	Oocyte
ENSMUSG00000029467	Atp2a2	3484.06	-0.571456	6.2423e-12	Oocyte
ENSMUSG00000022678	Nde1	645.509	0.897972	8.07597e-12	Oocyte
ENSMUSG00000031022	BC051019	665.673	1.485	8.31542e-12	Oocyte
ENSMUSG00000024816	Frmd8	448.034	0.641494	2.06244e-11	Oocyte
ENSMUSG00000047719	Ubiad1	568.984	-1.06889	2.38454e-11	Oocyte
ENSMUSG00000030259	Rassf8	159.008	1.16733	2.79494e-11	Oocyte
ENSMUSG00000040151	Hs2st1	2268.17	0.46598	4.31891e-11	Oocyte
ENSMUSG00000028017	Egf	384.366	0.906125	4.6002e-11	Oocyte
ENSMUSG00000015090	Ptgds	5.80367	-2.72466	4.73073e-11	Oocyte
ENSMUSG00000043909	Trp53bp1	2664.46	0.799381	4.73073e-11	Oocyte
ENSMUSG00000022360	Atad2	424.614	-1.03373	7.11716e-11	Oocyte
ENSMUSG00000005204	Senp3	86.4512	-1.62069	8.73977e-11	Oocyte
ENSMUSG00000010095	Slc3a2	2350.38	0.734882	8.73977e-11	Oocyte
ENSMUSG00000033022	Cdo1	526.036	1.4897	8.9655e-11	Oocyte
ENSMUSG00000078515	Ddi2	4719.66	0.318343	9.09509e-11	Oocyte
ENSMUSG00000070737	Tmem35b	456.181	0.969601	9.19533e-11	Oocyte
ENSMUSG00000026577	Blzf1	8.79849	2.40359	1.00538e-10	Oocyte
ENSMUSG00000031980	Agt	104.243	-1.58149	1.08716e-10	Oocyte
ENSMUSG00000060657	Marf1	648.378	-0.773799	1.25124e-10	Oocyte
ENSMUSG00000026319	2310035C23Rik	244.396	-1.30274	2.22687e-10	Oocyte
ENSMUSG00000073664	Nbeal1	161.62	-1.08437	2.5e-10	Oocyte
ENSMUSG00000004099	Dnmt1	1245.06	-1.0444	2.50009e-10	Oocyte
ENSMUSG00000034432	Cops8	2588.81	0.458215	2.65233e-10	Oocyte
ENSMUSG00000069678	Pcgf1	1381.55	0.894908	2.67007e-10	Oocyte
ENSMUSG00000040043	Rbms2	345.681	-1.42673	2.96733e-10	Oocyte
ENSMUSG00000026764	Kif5c	845.006	-0.773984	3.06388e-10	Oocyte
ENSMUSG00000047963	Stbd1	2322.69	0.677729	3.38815e-10	Oocyte
ENSMUSG00000044813	Shb	217.025	0.845927	3.41314e-10	Oocyte
ENSMUSG00000030970	Ctbp2	2042.04	0.785094	3.52408e-10	Oocyte
ENSMUSG00000032402	Smad3	3958.89	0.608284	3.55036e-10	Oocyte
ENSMUSG00000034509	Mad2l1bp	1784.74	1.02374	3.7467e-10	Oocyte
ENSMUSG00000081752	Gm14680	678.319	0.44937	3.84539e-10	Oocyte
ENSMUSG00000028890	Mtf1	1564.76	0.512442	3.86999e-10	Oocyte
ENSMUSG00000019998	Stx7	603	0.732957	4.0758e-10	Oocyte
ENSMUSG00000016619	Nup50	821.755	0.38869	4.59316e-10	Oocyte
ENSMUSG00000032849	Abcc4	104.145	-2.76676	4.70477e-10	Oocyte
ENSMUSG00000022951	Rcan1	383.666	1.07039	4.75165e-10	Oocyte
ENSMUSG00000031826	Usp10	613.192	0.728062	4.89115e-10	Oocyte
ENSMUSG00000027478	Dnmt3b	518.405	-0.708822	5.15517e-10	Oocyte
ENSMUSG00000022722	Arl6	534.193	0.530655	5.43083e-10	Oocyte
ENSMUSG00000030019	Fbxl14	94.7802	1.37296	5.43083e-10	Oocyte
ENSMUSG00000019979	Apaf1	381.832	1.04144	5.96469e-10	Oocyte
ENSMUSG00000050708	Ftl1	171.55	-1.4721	5.96469e-10	Oocyte
ENSMUSG00000063065	Mapk3	501.001	-1.32817	5.96469e-10	Oocyte
ENSMUSG00000061410	Zcchc14	439.815	0.931626	8.62757e-10	Oocyte
ENSMUSG00000055789	E330017A01Rik	187.359	-1.24315	9.11357e-10	Oocyte
ENSMUSG00000022353	Mtss1	455.319	0.849242	9.4608e-10	Oocyte
ENSMUSG00000032387	Rbpms2	1746.95	-0.86925	9.67518e-10	Oocyte
ENSMUSG00000002804	Nudt14	43.5144	1.32808	1.00563e-09	Oocyte
ENSMUSG00000020077	Srgn	1084.71	1.04811	1.1267e-09	Oocyte
ENSMUSG00000032191	Bcl2l10	24232.5	0.538923	1.1267e-09	Oocyte
ENSMUSG00000041872	Il17f	9.8386	-2.54386	1.1267e-09	Oocyte
ENSMUSG00000028358	Zfp618	517.115	-0.910194	1.20166e-09	Oocyte
ENSMUSG00000032537	Ephb1	40.8896	-2.58287	1.3964e-09	Oocyte
ENSMUSG00000055044	Pdlim1	442.372	0.734135	1.3964e-09	Oocyte
ENSMUSG00000051517	Arhgef39	4061.02	0.329877	1.44785e-09	Oocyte
ENSMUSG00000051586	Mical3	41.2976	1.569	1.44785e-09	Oocyte
ENSMUSG00000021728	Emb	148.913	1.41886	1.75065e-09	Oocyte
ENSMUSG00000041632	Mrps27	33.1927	1.4749	1.7646e-09	Oocyte
ENSMUSG00000024922	Ovol1	281.931	2.17876	1.82671e-09	Oocyte
ENSMUSG00000037106	Fer1l6	10.7927	-2.50917	1.82671e-09	Oocyte
ENSMUSG00000024218	Taf11	965.577	0.684749	1.91048e-09	Oocyte
ENSMUSG00000078942	Naip6	18.98	2.78829	1.95935e-09	Oocyte
ENSMUSG00000031015	Swap70	230.633	0.883589	2.14436e-09	Oocyte
ENSMUSG00000055546	Timd4	96.5051	-1.11997	2.14436e-09	Oocyte
ENSMUSG00000056124	B4galt6	3196.18	0.410713	2.14436e-09	Oocyte
ENSMUSG00000066030	Oog2	650.816	0.704847	2.16061e-09	Oocyte
ENSMUSG00000035151	Elmod2	944.218	-1.12177	2.37233e-09	Oocyte
ENSMUSG00000015749	Anp32e	528.871	0.87803	2.41628e-09	Oocyte
ENSMUSG00000035184	Fam124a	593.856	-0.892357	2.94383e-09	Oocyte
ENSMUSG00000071089	Trim75	836.524	0.743752	3.1866e-09	Oocyte
ENSMUSG00000023403	Stk31	192.923	-1.18059	3.33374e-09	Oocyte
ENSMUSG00000029361	Nos1	1562.26	-0.621567	3.39964e-09	Oocyte
ENSMUSG00000031986	Sprtn	38.1991	-1.29009	3.52391e-09	Oocyte
ENSMUSG00000038330	C87499	3980.78	0.443419	3.62026e-09	Oocyte
ENSMUSG00000054387	Mdm4	26932.2	-0.585993	3.62026e-09	Oocyte
ENSMUSG00000056201	Cfl1	466.019	-1.28969	3.66934e-09	Oocyte
ENSMUSG00000041852	Tcf20	657.409	0.757662	4.33264e-09	Oocyte
ENSMUSG00000026849	Tor1a	2944.46	0.591836	5.09752e-09	Oocyte
ENSMUSG00000038116	Phf20	6846.75	0.576092	5.123e-09	Oocyte
ENSMUSG00000021301	Hecw1	149.721	-1.04087	5.54891e-09	Oocyte
ENSMUSG00000005262	Ufd1l	33.2114	-1.37807	5.5736e-09	Oocyte
ENSMUSG00000030303	Far2	12.1696	-2.56581	6.87144e-09	Oocyte
ENSMUSG00000032254	Kif23	8410.08	0.26065	7.89374e-09	Oocyte
ENSMUSG00000042305	Tmem183a	358.063	-1.42902	9.00851e-09	Oocyte
ENSMUSG00000026675	Hsd17b7	353.444	-0.77921	9.33827e-09	Oocyte
ENSMUSG00000047804	Akap10	126.194	-1.17517	9.35629e-09	Oocyte
ENSMUSG00000023010	Tmbim6	959.599	-0.691328	1.01261e-08	Oocyte
ENSMUSG00000097131	D230017M19Rik	40.6834	1.25889	1.19003e-08	Oocyte
ENSMUSG00000079584	Gm364	25.1137	-2.33506	1.24323e-08	Oocyte
ENSMUSG00000021326	Trim27	246.321	0.953321	1.51287e-08	Oocyte
ENSMUSG00000005672	Kit	1144.39	-0.65203	1.58133e-08	Oocyte
ENSMUSG00000030007	Cct7	1043.48	0.635633	1.61833e-08	Oocyte
ENSMUSG00000028140	Mrpl9	198.408	-1.19802	1.61901e-08	Oocyte
ENSMUSG00000026701	Prdx6	175.361	1.4853	1.62963e-08	Oocyte
ENSMUSG00000003070	Efna2	82.2648	1.0535	1.63791e-08	Oocyte
ENSMUSG00000050931	Sgms2	227.224	1.3193	1.78373e-08	Oocyte
ENSMUSG00000072915	Gm12258	12.2035	2.61781	1.82829e-08	Oocyte
ENSMUSG00000027387	Zc3h8	502.029	0.786341	1.89907e-08	Oocyte
ENSMUSG00000030660	Pik3c2a	1113.3	-0.861565	1.97756e-08	Oocyte
ENSMUSG00000037580	Gch1	784.114	0.508329	2.13121e-08	Oocyte
ENSMUSG00000094992	Fbxw25	245.439	0.825657	2.16667e-08	Oocyte
ENSMUSG00000030089	Slc41a3	13.5276	-1.70887	2.6572e-08	Oocyte
ENSMUSG00000030188	Magohb	94.1308	0.841067	2.71923e-08	Oocyte
ENSMUSG00000086495	Gm13778	56.8582	1.52184	2.83607e-08	Oocyte
ENSMUSG00000059743	Fdps	25.5975	-1.06377	2.89308e-08	Oocyte
ENSMUSG00000020527	Myo19	2187.19	-0.746171	2.91369e-08	Oocyte
ENSMUSG00000039252	Lgi2	132.503	-2.28102	2.91369e-08	Oocyte
ENSMUSG00000042757	Tmem108	69.428	-2.00636	2.91369e-08	Oocyte
ENSMUSG00000052889	Prkcb	10.0188	-2.47829	2.91369e-08	Oocyte
ENSMUSG00000030096	Slc6a6	467.697	0.908508	2.94424e-08	Oocyte
ENSMUSG00000039774	Galnt12	27.9319	1.58618	2.94424e-08	Oocyte
ENSMUSG00000051879	Krt71	23.3788	-2.65119	2.94424e-08	Oocyte
ENSMUSG00000012405	Rpl15	431.958	0.522636	3.53761e-08	Oocyte
ENSMUSG00000019845	Tube1	345.917	0.583661	3.93303e-08	Oocyte
ENSMUSG00000030060	Hmces	3568.87	0.598679	4.0498e-08	Oocyte
ENSMUSG00000029464	Gpn3	199.209	-2.21243	4.12198e-08	Oocyte
ENSMUSG00000101965	Gm29129	25.5632	-1.39813	4.28446e-08	Oocyte
ENSMUSG00000004677	Myo9b	719.175	0.718568	4.63802e-08	Oocyte
ENSMUSG00000040264	Gbp2b	38.8714	-2.24819	4.66168e-08	Oocyte
ENSMUSG00000000305	Cdh4	687.205	0.559575	4.69458e-08	Oocyte
ENSMUSG00000008348	Ubc	176.032	-1.16478	5.3801e-08	Oocyte
ENSMUSG00000025068	Gsto1	55.7098	-2.00524	5.3801e-08	Oocyte
ENSMUSG00000020359	Phykpl	56.5758	0.939724	5.44524e-08	Oocyte
ENSMUSG00000022774	Ncbp2	801.636	0.459773	5.61258e-08	Oocyte
ENSMUSG00000020492	Ska2	272.185	-0.795149	5.7756e-08	Oocyte
ENSMUSG00000031516	Dctn6	65.3928	1.47599	5.79087e-08	Oocyte
ENSMUSG00000036022	Fam122b	107.854	-0.714397	5.99247e-08	Oocyte
ENSMUSG00000060508	Nlrp9b	920.021	0.567399	5.99247e-08	Oocyte
ENSMUSG00000025790	Slco3a1	2384.22	0.496343	6.01886e-08	Oocyte
ENSMUSG00000032020	Ubash3b	834.219	0.92513	6.17952e-08	Oocyte
ENSMUSG00000054115	Skp2	525.169	0.717745	6.19012e-08	Oocyte
ENSMUSG00000020419	Hormad2	13.5861	2.25253	6.79348e-08	Oocyte
ENSMUSG00000044768	D1Ertd622e	2998.03	0.604565	6.98911e-08	Oocyte
ENSMUSG00000005503	Evx1	42.4229	1.07578	7.30709e-08	Oocyte
ENSMUSG00000002332	Dhrs1	462.358	0.667827	8.63039e-08	Oocyte
ENSMUSG00000047419	Cmya5	988.797	0.600659	8.83024e-08	Oocyte
ENSMUSG00000025216	Lbx1	166.005	1.36493	9.85842e-08	Oocyte
ENSMUSG00000039131	Gipc2	240.62	1.03301	1.06123e-07	Oocyte
ENSMUSG00000062203	Gspt1	220.731	-0.71227	1.06123e-07	Oocyte
ENSMUSG00000029592	Usp30	1155.81	0.503203	1.16058e-07	Oocyte
ENSMUSG00000026587	Astn1	17.6905	-2.05723	1.2615e-07	Oocyte
ENSMUSG00000020530	Ggnbp2	664.621	-0.724077	1.30068e-07	Oocyte
ENSMUSG00000028420	Tmem38b	667.032	0.422474	1.31347e-07	Oocyte
ENSMUSG00000009092	Derl3	136.353	-1.79447	1.39992e-07	Oocyte
ENSMUSG00000031983	2310022B05Rik	483.139	0.670579	1.41735e-07	Oocyte
ENSMUSG00000059921	Unc5c	1464.01	-0.642553	1.42589e-07	Oocyte
ENSMUSG00000024673	Ms4a1	1072.41	-0.531811	1.43352e-07	Oocyte
ENSMUSG00000030942	Thumpd1	860.963	0.568055	1.50416e-07	Oocyte
ENSMUSG00000096054	Syne1	9.38643	2.19752	1.57244e-07	Oocyte
ENSMUSG00000025239	Limd1	892.791	0.534439	1.60883e-07	Oocyte
ENSMUSG00000025358	Cdk2	84.0067	-1.98215	1.61826e-07	Oocyte
ENSMUSG00000030102	Itpr1	1641.39	-0.420484	1.61826e-07	Oocyte
ENSMUSG00000085793	Lin52	127.835	-0.827089	1.67056e-07	Oocyte
ENSMUSG00000027692	Tnik	82.013	-1.05185	1.68429e-07	Oocyte
ENSMUSG00000066000	Zfp979	175.36	-0.930994	1.81718e-07	Oocyte
ENSMUSG00000026289	Atg16l1	1056.18	0.51709	1.82951e-07	Oocyte
ENSMUSG00000027099	Mtx2	98.2568	-2.19263	1.82951e-07	Oocyte
ENSMUSG00000062393	Dgkk	211.384	-1.13582	1.98434e-07	Oocyte
ENSMUSG00000026971	Itgb6	31.7833	-2.09522	2.07524e-07	Oocyte
ENSMUSG00000030313	Dennd5b	122.54	2.10838	2.23405e-07	Oocyte
ENSMUSG00000053038	Gm6180	45.7462	-1.09907	2.30259e-07	Oocyte
ENSMUSG00000037725	Ckap2	804.213	-0.857951	2.31452e-07	Oocyte
ENSMUSG00000021367	Edn1	52.6516	-2.025	2.46691e-07	Oocyte
ENSMUSG00000002076	Hsf2bp	1380.53	0.343779	2.52236e-07	Oocyte
ENSMUSG00000020601	Trib2	98.0707	0.937091	2.55915e-07	Oocyte
ENSMUSG00000019989	Enpp3	9.5837	-2.07553	2.78101e-07	Oocyte
ENSMUSG00000022428	Cby1	313.652	0.99714	2.87298e-07	Oocyte
ENSMUSG00000089659	Gm3470	60.7095	-0.971086	3.02223e-07	Oocyte
ENSMUSG00000025724	Sec11a	1160.39	0.748954	3.56572e-07	Oocyte
ENSMUSG00000049932	H2afx	177.997	-1.15471	3.56572e-07	Oocyte
ENSMUSG00000029314	Agpat9	99.0967	-1.54756	3.66021e-07	Oocyte
ENSMUSG00000062995	Ica1	1603.92	0.5882	3.66021e-07	Oocyte
ENSMUSG00000021999	Cpb2	274.737	-0.843174	3.71733e-07	Oocyte
ENSMUSG00000079042	Apela	15609.4	0.4581	3.91213e-07	Oocyte
ENSMUSG00000021273	Fdft1	196.019	-1.43307	4.17957e-07	Oocyte
ENSMUSG00000049764	Zfp280b	1690.95	-0.434067	4.21219e-07	Oocyte
ENSMUSG00000043467	Zbtb37	228.561	1.3435	4.25398e-07	Oocyte
ENSMUSG00000036158	Prickle1	4321.77	0.43521	4.58156e-07	Oocyte
ENSMUSG00000056487	Mettl7a2	213.572	0.809648	4.58892e-07	Oocyte
ENSMUSG00000061130	Ppm1b	2633.14	0.467116	4.63122e-07	Oocyte
ENSMUSG00000079555	Haus3	1067.49	-0.981308	4.86976e-07	Oocyte
ENSMUSG00000016946	Kctd5	2419.8	0.44836	4.97635e-07	Oocyte
ENSMUSG00000001739	Cldn15	73.0829	-1.32534	5.00604e-07	Oocyte
ENSMUSG00000028857	Tmem222	132.276	1.00838	5.14006e-07	Oocyte
ENSMUSG00000035394	Cfap53	98.4604	-1.20963	5.69032e-07	Oocyte
ENSMUSG00000044018	Mrpl50	57.1833	1.0382	6.16779e-07	Oocyte
ENSMUSG00000084094	Gm13961	166.545	-0.53793	6.43007e-07	Oocyte
ENSMUSG00000029499	Pxmp2	221.475	-0.96075	6.4347e-07	Oocyte
ENSMUSG00000026986	Hnmt	73.4081	-1.22669	6.62881e-07	Oocyte
ENSMUSG00000048109	Rbm15	1066.4	1.00529	6.66502e-07	Oocyte
ENSMUSG00000024998	Plce1	341.319	0.731108	6.87202e-07	Oocyte
ENSMUSG00000041722	Khdc1c	1237.54	-0.745613	7.20544e-07	Oocyte
ENSMUSG00000050240	Hic2	1280.7	0.582265	7.38947e-07	Oocyte
ENSMUSG00000024947	Men1	39.6101	-1.40051	7.68536e-07	Oocyte
ENSMUSG00000029036	Atad3a	433.688	0.748839	7.68536e-07	Oocyte
ENSMUSG00000021222	Dcaf4	110.263	1.22776	8.0211e-07	Oocyte
ENSMUSG00000025092	Hspa12a	232.335	0.703879	8.34981e-07	Oocyte
ENSMUSG00000027048	Abcb11	37.1206	-1.45362	8.66798e-07	Oocyte
ENSMUSG00000079450	Cldn34c1	3.80712	2.29104	8.66798e-07	Oocyte
ENSMUSG00000002265	Peg3	32.7779	-1.15057	9.61574e-07	Oocyte
ENSMUSG00000017667	Zfp334	80.0927	0.683045	9.90623e-07	Oocyte
ENSMUSG00000026580	Selp	221.351	-0.681532	9.91873e-07	Oocyte
ENSMUSG00000058019	Ces5a	14.3378	-2.26195	9.91873e-07	Oocyte
ENSMUSG00000021108	Prkch	24.3105	-2.03423	9.98637e-07	Oocyte
ENSMUSG00000020687	Cdc27	1307.32	-0.559708	1.02315e-06	Oocyte
ENSMUSG00000025702	2008-03-01	27.035	1.55155	1.02315e-06	Oocyte
ENSMUSG00000031848	Lsm4	32.9443	-1.89708	1.08721e-06	Oocyte
ENSMUSG00000039058	Ak5	135.531	-0.83543	1.09497e-06	Oocyte
ENSMUSG00000034552	Zswim2	8.05495	-2.26088	1.10384e-06	Oocyte
ENSMUSG00000033773	Rpap2	310.29	0.572682	1.10501e-06	Oocyte
ENSMUSG00000036168	Ccdc38	232.73	-1.16745	1.12697e-06	Oocyte
ENSMUSG00000002307	Daxx	791.768	0.523745	1.16794e-06	Oocyte
ENSMUSG00000031242	2610002M06Rik	205.549	0.924685	1.16822e-06	Oocyte
ENSMUSG00000025907	Rb1cc1	3801.81	-0.369861	1.2201e-06	Oocyte
ENSMUSG00000064128	Cenpj	1592.85	0.368873	1.26756e-06	Oocyte
ENSMUSG00000026755	Arpc5l	1942.47	0.410102	1.2781e-06	Oocyte
ENSMUSG00000028552	Eps15	885.756	-0.414641	1.30409e-06	Oocyte
ENSMUSG00000029787	Avl9	769.866	-0.49115	1.32598e-06	Oocyte
ENSMUSG00000061024	Rrs1	573.977	0.674625	1.36275e-06	Oocyte
ENSMUSG00000072694	1500011B03Rik	324.816	0.703888	1.41146e-06	Oocyte
ENSMUSG00000021500	Ddx46	1411.39	0.405054	1.44776e-06	Oocyte
ENSMUSG00000056752	Dnah9	479.638	-0.655726	1.49056e-06	Oocyte
ENSMUSG00000060445	Sycp2	1033.59	-0.631303	1.53523e-06	Oocyte
ENSMUSG00000005686	Ampd3	1479.81	0.679055	1.54873e-06	Oocyte
ENSMUSG00000019373	Cops3	199.723	-0.676368	1.54873e-06	Oocyte
ENSMUSG00000047141	Zfp654	291.057	-0.824067	1.54873e-06	Oocyte
ENSMUSG00000066141	Gm11232	10.5159	-1.67368	1.54873e-06	Oocyte
ENSMUSG00000070960	Gm19680	40.1777	-0.819741	1.54873e-06	Oocyte
ENSMUSG00000029920	Smarcad1	105.176	-0.917188	1.57301e-06	Oocyte
ENSMUSG00000029518	Rab35	974.441	0.593831	1.57842e-06	Oocyte
ENSMUSG00000041272	Tox	37.6037	-0.916518	1.57842e-06	Oocyte
ENSMUSG00000051695	Pcbp1	8478.38	0.504056	1.58734e-06	Oocyte
ENSMUSG00000040649	Rimklb	990.371	0.487164	1.59055e-06	Oocyte
ENSMUSG00000039891	Txlnb	7.85027	-2.29324	1.60016e-06	Oocyte
ENSMUSG00000019312	Grb7	32.779	1.62336	1.8293e-06	Oocyte
ENSMUSG00000037536	Fbxo34	565.737	-0.843183	1.83892e-06	Oocyte
ENSMUSG00000099597	Gm28933	84.6897	-1.0955	1.83892e-06	Oocyte
ENSMUSG00000044378	Slc15a5	115.104	0.934752	1.84475e-06	Oocyte
ENSMUSG00000004071	Cdip1	858.08	0.768253	1.85155e-06	Oocyte
ENSMUSG00000026360	Rgs2	3015.49	0.509436	1.85155e-06	Oocyte
ENSMUSG00000028676	Srsf10	244.816	-0.563109	1.85155e-06	Oocyte
ENSMUSG00000029145	Eif2b4	348.972	1.66109	1.88085e-06	Oocyte
ENSMUSG00000019066	Rab3d	2800.39	0.595482	1.9188e-06	Oocyte
ENSMUSG00000031751	Amfr	7078.04	0.328983	1.9188e-06	Oocyte
ENSMUSG00000052566	Hook2	264.459	0.811187	1.9188e-06	Oocyte
ENSMUSG00000020230	Prmt2	987.516	0.576789	1.93756e-06	Oocyte
ENSMUSG00000057069	Ero1lb	377.367	-0.434454	1.96112e-06	Oocyte
ENSMUSG00000014959	Gorasp2	1289.66	0.527831	2.03706e-06	Oocyte
ENSMUSG00000032915	Adgre4	11.3108	-1.57363	2.05618e-06	Oocyte
ENSMUSG00000049225	Pdp1	411.895	0.579604	2.09986e-06	Oocyte
ENSMUSG00000044250	Pced1b	46.55	1.05148	2.13366e-06	Oocyte
ENSMUSG00000083403	Gm13041	51.7316	-1.02405	2.14091e-06	Oocyte
ENSMUSG00000004642	Slbp	7205.92	0.531315	2.24572e-06	Oocyte
ENSMUSG00000036306	Lzts1	16.6346	2.01417	2.27334e-06	Oocyte
ENSMUSG00000019804	Snx3	184.243	-0.935911	2.38713e-06	Oocyte
ENSMUSG00000041697	Cox6a1	337.058	-1.08291	2.39784e-06	Oocyte
ENSMUSG00000097915	A330009N23Rik	17.3711	-1.89855	2.42234e-06	Oocyte
ENSMUSG00000041708	Mpped1	95.9147	0.799983	2.42876e-06	Oocyte
ENSMUSG00000043572	Pars2	33.7074	2.05882	2.47116e-06	Oocyte
ENSMUSG00000021807	2700060E02Rik	574.725	0.555761	2.50482e-06	Oocyte
ENSMUSG00000103653	Gstp-ps	61.0701	1.27387	2.76763e-06	Oocyte
ENSMUSG00000058587	Tmod3	98.5436	0.643663	2.86103e-06	Oocyte
ENSMUSG00000022498	Txndc11	986.184	0.55421	2.93648e-06	Oocyte
ENSMUSG00000043067	Dpy19l1	126.812	-0.584132	3.09937e-06	Oocyte
ENSMUSG00000103158	Gm31925	54.662	-0.883046	3.12197e-06	Oocyte
ENSMUSG00000026162	Nhej1	22.2248	1.63758	3.12906e-06	Oocyte
ENSMUSG00000007476	Lrrc8a	514.855	-0.527443	3.16593e-06	Oocyte
ENSMUSG00000023892	Zfp51	92.9846	-1.02617	3.16593e-06	Oocyte
ENSMUSG00000020840	Blmh	383.931	-0.707634	3.35022e-06	Oocyte
ENSMUSG00000001089	Luzp1	1408.46	0.603856	3.35053e-06	Oocyte
ENSMUSG00000037979	Ccdc92	207.41	-1.05429	3.35053e-06	Oocyte
ENSMUSG00000053644	Aldh7a1	191.741	-0.815372	3.35053e-06	Oocyte
ENSMUSG00000074221	Zfp568	626.471	0.690551	3.35053e-06	Oocyte
ENSMUSG00000044786	Zfp36	14.1556	-1.84267	3.37004e-06	Oocyte
ENSMUSG00000086727	4931428L18Rik	333.659	0.772015	3.51932e-06	Oocyte
ENSMUSG00000027331	Knstrn	1916.91	0.475042	3.52888e-06	Oocyte
ENSMUSG00000024645	Timm21	363.876	0.621764	3.54099e-06	Oocyte
ENSMUSG00000009630	Ppp2cb	27.9232	-1.79178	3.83566e-06	Oocyte
ENSMUSG00000052751	Repin1	90.767	0.719066	3.83566e-06	Oocyte
ENSMUSG00000058267	Mrps14	436.81	0.580283	3.99789e-06	Oocyte
ENSMUSG00000060863	Tcl1b2	7220.28	0.650269	4.02422e-06	Oocyte
ENSMUSG00000015766	Eps8	306.142	0.432627	4.27823e-06	Oocyte
ENSMUSG00000027739	Rab33b	157.12	1.04036	4.29255e-06	Oocyte
ENSMUSG00000031629	Cenpu	448.76	0.479151	4.43666e-06	Oocyte
ENSMUSG00000078925	D030018L15Rik	348.555	-0.600627	4.45744e-06	Oocyte
ENSMUSG00000086022	Rad51ap2	78.8283	1.19797	4.52323e-06	Oocyte
ENSMUSG00000015085	Entpd2	18.0989	-1.59581	4.59355e-06	Oocyte
ENSMUSG00000042111	Ccdc115	610.151	-0.865268	4.59355e-06	Oocyte
ENSMUSG00000040746	Rnf167	125.941	-0.846316	4.61822e-06	Oocyte
ENSMUSG00000038286	Bphl	67.2725	1.02507	4.74379e-06	Oocyte
ENSMUSG00000005897	Nr2c1	182.868	1.0262	5.06057e-06	Oocyte
ENSMUSG00000028164	Manba	99.1691	-1.33654	5.06057e-06	Oocyte
ENSMUSG00000058594	Fbxo18	1448.37	0.448819	5.43811e-06	Oocyte
ENSMUSG00000027635	Dsn1	2714.85	0.511147	5.51885e-06	Oocyte
ENSMUSG00000034762	Glis1	282.118	-1.23686	5.62722e-06	Oocyte
ENSMUSG00000001403	Ube2c	156.06	-1.21232	5.72355e-06	Oocyte
ENSMUSG00000044468	Fam46c	1994.55	-0.663985	5.75304e-06	Oocyte
ENSMUSG00000038871	Bpgm	19514.5	0.487418	5.78768e-06	Oocyte
ENSMUSG00000058672	Tubb2a	329.849	-0.783128	6.23236e-06	Oocyte
ENSMUSG00000003992	Ssbp2	849.5	0.396964	6.23947e-06	Oocyte
ENSMUSG00000021701	Plk2	33.7183	-1.46613	6.23947e-06	Oocyte
ENSMUSG00000035385	Ccl2	3.13127	-2.21293	6.23947e-06	Oocyte
ENSMUSG00000049460	Gm8396	132.634	0.675375	6.27452e-06	Oocyte
ENSMUSG00000024427	Spry4	3154.87	0.440662	6.29968e-06	Oocyte
ENSMUSG00000021198	Unc79	16.1889	-1.45868	6.33244e-06	Oocyte
ENSMUSG00000031487	Brf2	1916.8	0.802598	6.39471e-06	Oocyte
ENSMUSG00000029236	Nmu	3.37789	-2.10816	6.47936e-06	Oocyte
ENSMUSG00000002797	Ggct	5083.38	0.69022	6.6111e-06	Oocyte
ENSMUSG00000019478	Rab4a	403.555	0.645908	6.678e-06	Oocyte
ENSMUSG00000028034	Fubp1	438.974	-0.76813	6.69852e-06	Oocyte
ENSMUSG00000019841	Rev3l	1133.02	-0.625243	6.73702e-06	Oocyte
ENSMUSG00000023330	Dtwd1	64.5731	1.0921	6.95277e-06	Oocyte
ENSMUSG00000042271	Nxt2	373.951	-1.16258	7.28095e-06	Oocyte
ENSMUSG00000070732	Rbm44	133.518	1.078	7.69032e-06	Oocyte
ENSMUSG00000022747	St3gal6	74.1924	1.14704	8.13676e-06	Oocyte
ENSMUSG00000036686	Cc2d1a	25.5304	-1.75362	8.89949e-06	Oocyte
ENSMUSG00000078783	Gm9733	12.7896	-1.79374	8.89949e-06	Oocyte
ENSMUSG00000090470	Prr23a3	129.44	0.70588	8.89949e-06	Oocyte
ENSMUSG00000026429	Ube2t	162.439	-1.04982	8.9487e-06	Oocyte
ENSMUSG00000048279	Sacs	154.983	1.02541	8.97704e-06	Oocyte
ENSMUSG00000021048	Mthfd1	105.331	0.795997	9.25322e-06	Oocyte
ENSMUSG00000033902	Mapkbp1	793.68	0.541612	9.37405e-06	Oocyte
ENSMUSG00000050150	Slc9b1	412.813	1.3976	9.4204e-06	Oocyte
ENSMUSG00000071324	Armc2	33.6693	0.916737	9.61523e-06	Oocyte
ENSMUSG00000005483	Dnajb1	880.354	0.680942	9.71463e-06	Oocyte
ENSMUSG00000022983	Scaf4	1577.45	0.496016	9.71754e-06	Oocyte
ENSMUSG00000035232	Pdk3	552.518	-0.584962	9.95325e-06	Oocyte
ENSMUSG00000045917	Tmem268	9.38889	2.11708	9.95325e-06	Oocyte
ENSMUSG00000016344	Ppdpf	26.9896	-1.48598	1.01837e-05	Oocyte
ENSMUSG00000028563	Tm2d1	37.2041	-1.49364	1.02689e-05	Oocyte
ENSMUSG00000026239	Pde6d	45.6716	-1.00102	1.0431e-05	Oocyte
ENSMUSG00000054134	Umodl1	488.416	0.61665	1.0431e-05	Oocyte
ENSMUSG00000040782	Rfwd2	635.9	0.601035	1.04669e-05	Oocyte
ENSMUSG00000027115	Kif18a	933.876	-0.471719	1.12713e-05	Oocyte
ENSMUSG00000002015	Bcap31	505.267	0.835255	1.16498e-05	Oocyte
ENSMUSG00000038806	Sde2	232.887	-0.858607	1.18764e-05	Oocyte
ENSMUSG00000009995	Taz	468.042	0.540259	1.20953e-05	Oocyte
ENSMUSG00000093651	Gm5873	6.88123	-1.78745	1.20953e-05	Oocyte
ENSMUSG00000006932	Ctnnb1	3780.39	0.428401	1.2146e-05	Oocyte
ENSMUSG00000057223	Gm6578	35.6446	0.953071	1.2146e-05	Oocyte
ENSMUSG00000094518	Gm6421	114.015	-1.00824	1.2146e-05	Oocyte
ENSMUSG00000066359	Tcl1b1	20037.3	0.698193	1.21948e-05	Oocyte
ENSMUSG00000027612	Mmp24	175.165	-1.28656	1.26735e-05	Oocyte
ENSMUSG00000056749	Nfil3	544.032	0.804748	1.28715e-05	Oocyte
ENSMUSG00000074437	Defa29	7.51126	-1.79559	1.29521e-05	Oocyte
ENSMUSG00000017740	Slc12a5	97.6532	0.628518	1.30273e-05	Oocyte
ENSMUSG00000022898	Dscr3	943.882	0.651593	1.35097e-05	Oocyte
ENSMUSG00000056486	Chn1	1203.32	0.365675	1.37117e-05	Oocyte
ENSMUSG00000027330	Cdc25b	97.1392	-1.19876	1.38763e-05	Oocyte
ENSMUSG00000067336	Bmpr2	698.427	-0.695794	1.41791e-05	Oocyte
ENSMUSG00000042129	Rassf4	15.3132	1.70944	1.43048e-05	Oocyte
ENSMUSG00000026047	Kdelc1	182.887	0.596749	1.45742e-05	Oocyte
ENSMUSG00000087512	Gm11985	34.9795	-1.13619	1.45742e-05	Oocyte
ENSMUSG00000038482	Tfdp1	368.347	0.537183	1.46408e-05	Oocyte
ENSMUSG00000031555	Adam9	176.385	-0.765277	1.4752e-05	Oocyte
ENSMUSG00000021238	Aldh6a1	53.1118	-1.46049	1.51533e-05	Oocyte
ENSMUSG00000023571	Fam132a	188.68	-1.03399	1.51533e-05	Oocyte
ENSMUSG00000079007	Tcl1b4	5675.8	0.703956	1.51533e-05	Oocyte
ENSMUSG00000022305	Lrp12	123.114	-0.850507	1.51701e-05	Oocyte
ENSMUSG00000032179	Bmp5	336.067	-0.661831	1.52161e-05	Oocyte
ENSMUSG00000045038	Prkce	23.8506	-2.11552	1.52161e-05	Oocyte
ENSMUSG00000053838	Nudcd3	274.816	-0.674364	1.56403e-05	Oocyte
ENSMUSG00000032192	Gnb5	12.1549	1.62168	1.61866e-05	Oocyte
ENSMUSG00000091866	Gm6257	17.3524	1.16501	1.65926e-05	Oocyte
ENSMUSG00000062960	Kdr	91.3489	-1.39238	1.68089e-05	Oocyte
ENSMUSG00000094344	Gm11942	143.061	-1.20945	1.68278e-05	Oocyte
ENSMUSG00000018363	Smurf2	3295.69	0.439064	1.69815e-05	Oocyte
ENSMUSG00000100975	Gm28875	44.8132	1.03448	1.71025e-05	Oocyte
ENSMUSG00000027274	Mkks	433.103	0.739762	1.73118e-05	Oocyte
ENSMUSG00000013822	Elof1	316.825	0.875918	1.73772e-05	Oocyte
ENSMUSG00000021286	Zfyve21	913.849	0.449455	1.74482e-05	Oocyte
ENSMUSG00000017760	Ctsa	24.5691	-1.86885	1.76948e-05	Oocyte
ENSMUSG00000030560	Ctsc	33.4425	1.89034	1.78151e-05	Oocyte
ENSMUSG00000095690	Rab11b-ps2	21.1884	-1.71717	1.78151e-05	Oocyte
ENSMUSG00000066415	Msl2	352.271	0.655235	1.82596e-05	Oocyte
ENSMUSG00000061082	Plac1	7.23111	-1.58312	1.8362e-05	Oocyte
ENSMUSG00000054580	Pla2r1	29.637	-1.56444	1.85352e-05	Oocyte
ENSMUSG00000030619	Eed	1570.65	0.337974	1.85902e-05	Oocyte
ENSMUSG00000090673	Gm340	90.021	-1.45491	1.88011e-05	Oocyte
ENSMUSG00000028703	Lrrc41	15.2394	-2.02309	1.89732e-05	Oocyte
ENSMUSG00000047084	Ngrn	547.713	0.691465	1.92136e-05	Oocyte
ENSMUSG00000006527	Sfmbt1	3271.73	0.299966	1.96053e-05	Oocyte
ENSMUSG00000028953	Abcf2	1321.06	0.48303	1.97004e-05	Oocyte
ENSMUSG00000029003	Mad2l2	1354.88	0.464322	1.9729e-05	Oocyte
ENSMUSG00000034311	Kif4	1120.26	-0.535477	1.98961e-05	Oocyte
ENSMUSG00000035024	Ncapd3	253.607	-0.675246	1.98961e-05	Oocyte
ENSMUSG00000022340	Sybu	57.1	0.714498	2.03063e-05	Oocyte
ENSMUSG00000037965	Zc3h7a	77.2134	1.91701	2.08262e-05	Oocyte
ENSMUSG00000040325	Vprbp	197.719	-0.782544	2.08262e-05	Oocyte
ENSMUSG00000051396	Hspa14	965.913	0.381351	2.10787e-05	Oocyte
ENSMUSG00000031839	Hsbp1	1296.76	0.458904	2.11869e-05	Oocyte
ENSMUSG00000035941	Ibtk	1914.26	0.334324	2.11869e-05	Oocyte
ENSMUSG00000036376	Abt1	96.1928	-1.81052	2.11869e-05	Oocyte
ENSMUSG00000017774	Myo1c	2050.19	-0.362051	2.13829e-05	Oocyte
ENSMUSG00000050310	Rictor	610.519	-0.660626	2.13829e-05	Oocyte
ENSMUSG00000030523	Trpm1	14.3504	-1.8768	2.21723e-05	Oocyte
ENSMUSG00000030897	Cnga4	70.3515	1.15495	2.24208e-05	Oocyte
ENSMUSG00000030156	Cd69	12.7628	-1.6514	2.27145e-05	Oocyte
ENSMUSG00000031683	Lsm6	120.2	-1.35583	2.28083e-05	Oocyte
ENSMUSG00000036617	Etl4	54.6132	-0.804252	2.30066e-05	Oocyte
ENSMUSG00000037697	Ddhd1	2681.05	0.340179	2.32788e-05	Oocyte
ENSMUSG00000020674	Pxdn	998.697	0.460949	2.37185e-05	Oocyte
ENSMUSG00000029669	Tspan12	6.91005	-1.69247	2.37776e-05	Oocyte
ENSMUSG00000037104	Socs5	179.882	0.760618	2.37776e-05	Oocyte
ENSMUSG00000077450	Rab11b	48.7957	-1.62818	2.37776e-05	Oocyte
ENSMUSG00000022510	Trp63	154.256	-0.744931	2.41923e-05	Oocyte
ENSMUSG00000026436	Elk4	650.051	-0.58219	2.44585e-05	Oocyte
ENSMUSG00000031352	Hccs	173.035	-0.90712	2.45e-05	Oocyte
ENSMUSG00000014905	Dnajb9	235.172	-1.10327	2.5321e-05	Oocyte
ENSMUSG00000024277	Mapre2	1182.02	-0.46462	2.60601e-05	Oocyte
ENSMUSG00000027601	Mtfr1	376.372	-0.631225	2.63477e-05	Oocyte
ENSMUSG00000005054	Cstb	13.6911	-1.60327	2.69898e-05	Oocyte
ENSMUSG00000026571	Dcaf6	180.334	-0.710868	2.71158e-05	Oocyte
ENSMUSG00000062151	Unc13c	9047.12	-0.548239	2.7122e-05	Oocyte
ENSMUSG00000055912	Tmem150a	1684.57	-0.600117	2.71438e-05	Oocyte
ENSMUSG00000017677	Wsb1	1585.25	-0.479444	2.77048e-05	Oocyte
ENSMUSG00000057963	Itpk1	818.64	0.639876	2.77048e-05	Oocyte
ENSMUSG00000002205	Vrk3	377.113	1.09442	2.8451e-05	Oocyte
ENSMUSG00000007613	Tgfbr1	900.302	-0.583463	2.87169e-05	Oocyte
ENSMUSG00000094156	Sult2a7	8.39771	-1.99618	2.88701e-05	Oocyte
ENSMUSG00000039835	Nhsl1	1090.17	0.484918	2.92537e-05	Oocyte
ENSMUSG00000010608	Rbm25	4572.84	0.399761	2.93653e-05	Oocyte
ENSMUSG00000039480	Nt5dc1	146.416	-1.05373	2.93653e-05	Oocyte
ENSMUSG00000029319	Coq2	310.471	0.724132	2.97642e-05	Oocyte
ENSMUSG00000093847	Gm5039	2.23674	-2.0252	2.97642e-05	Oocyte
ENSMUSG00000047126	Cltc	585.86	-0.577771	2.98707e-05	Oocyte
ENSMUSG00000051223	Bzw1	1513.35	-0.463564	2.98707e-05	Oocyte
ENSMUSG00000074871	Ctsm	3.62999	-1.78528	3.01932e-05	Oocyte
ENSMUSG00000025199	Chuk	160.462	-0.886276	3.05921e-05	Oocyte
ENSMUSG00000044950	Pwwp2a	307.53	0.611211	3.05921e-05	Oocyte
ENSMUSG00000067750	Khdc1a	656.8	-0.607892	3.05921e-05	Oocyte
ENSMUSG00000054446	Cpa1	16018	0.515501	3.07529e-05	Oocyte
ENSMUSG00000000782	Tcf7	960.391	-0.488177	3.13261e-05	Oocyte
ENSMUSG00000019467	Arhgef25	8.86257	-2.05358	3.15277e-05	Oocyte
ENSMUSG00000026565	Pou2f1	1378.42	0.370888	3.15277e-05	Oocyte
ENSMUSG00000024273	2700062C07Rik	365.38	0.680856	3.19267e-05	Oocyte
ENSMUSG00000024507	Hsd17b4	134.444	0.708458	3.19267e-05	Oocyte
ENSMUSG00000028434	Epb41l4b	570.266	0.674886	3.19267e-05	Oocyte
ENSMUSG00000071650	Ganab	73.0462	-1.14514	3.19267e-05	Oocyte
ENSMUSG00000003418	St8sia6	37.5187	0.981255	3.22947e-05	Oocyte
ENSMUSG00000034098	Fstl5	90.946	-1.94948	3.24043e-05	Oocyte
ENSMUSG00000047534	Mis18bp1	954.249	-0.732374	3.24157e-05	Oocyte
ENSMUSG00000025464	Paox	30.6219	-0.901452	3.29039e-05	Oocyte
ENSMUSG00000036298	Slc2a13	34.6325	-1.1278	3.29039e-05	Oocyte
ENSMUSG00000074870	Cts3	8.6077	-1.67455	3.29162e-05	Oocyte
ENSMUSG00000001833	2007-09-01	203.842	-0.767569	3.33361e-05	Oocyte
ENSMUSG00000031750	Il34	314.841	-1.05983	3.33361e-05	Oocyte
ENSMUSG00000031007	Atp6ap2	1733.52	-0.701621	3.37691e-05	Oocyte
ENSMUSG00000033106	Slc7a6os	259.145	-0.565186	3.37691e-05	Oocyte
ENSMUSG00000034780	B3galt1	38.3769	-1.53069	3.37691e-05	Oocyte
ENSMUSG00000062908	Acadm	404.038	0.455986	3.37691e-05	Oocyte
ENSMUSG00000020255	D10Wsu102e	4221.91	0.413448	3.48426e-05	Oocyte
ENSMUSG00000048249	Crebrf	155.756	-1.05998	3.48426e-05	Oocyte
ENSMUSG00000059263	Usp47	721.944	0.414588	3.48426e-05	Oocyte
ENSMUSG00000022109	Med4	1060.61	0.632897	3.5354e-05	Oocyte
ENSMUSG00000027742	Cog6	107.657	-1.11938	3.5354e-05	Oocyte
ENSMUSG00000037416	Dmxl1	275.593	-1.1426	3.56654e-05	Oocyte
ENSMUSG00000054582	Pabpc1l	342.961	-1.26284	3.63422e-05	Oocyte
ENSMUSG00000027843	Ptpn22	213.316	-0.532959	3.75472e-05	Oocyte
ENSMUSG00000028012	Rrh	21.9228	-1.50045	3.75472e-05	Oocyte
ENSMUSG00000049109	Themis	67.5617	-1.04611	3.80372e-05	Oocyte
ENSMUSG00000040812	Agbl2	22.4306	1.69308	3.8882e-05	Oocyte
ENSMUSG00000060073	Psma3	73.7626	1.20251	3.89377e-05	Oocyte
ENSMUSG00000044456	Rin3	74.0239	0.775627	3.92663e-05	Oocyte
ENSMUSG00000030842	Lamtor1	162.95	-1.3313	3.97683e-05	Oocyte
ENSMUSG00000049516	Spty2d1	361.863	0.509076	3.97683e-05	Oocyte
ENSMUSG00000047030	Spata2	267.641	-0.900199	4.01515e-05	Oocyte
ENSMUSG00000040591	1110051M20Rik	93.2355	0.867046	4.06623e-05	Oocyte
ENSMUSG00000090083	Rnf8	305.735	0.456097	4.07762e-05	Oocyte
ENSMUSG00000020669	Sh3yl1	780.509	0.383891	4.0924e-05	Oocyte
ENSMUSG00000098506	Phf20-ps	477.931	0.516668	4.14677e-05	Oocyte
ENSMUSG00000053153	Spag16	7.84266	2.02148	4.17798e-05	Oocyte
ENSMUSG00000020696	Rffl	232.4	-0.837662	4.23085e-05	Oocyte
ENSMUSG00000004070	Hmox2	19.7131	1.68709	4.38125e-05	Oocyte
ENSMUSG00000031021	Tmem9b	139.403	0.638923	4.38395e-05	Oocyte
ENSMUSG00000048949	Gm6206	352.974	-0.536439	4.48931e-05	Oocyte
ENSMUSG00000016427	Ndufa1	220.28	-1.1589	4.63061e-05	Oocyte
ENSMUSG00000020388	Pdlim4	7.95299	-1.8395	4.68326e-05	Oocyte
ENSMUSG00000025010	Ccnj	126.053	1.15758	4.70777e-05	Oocyte
ENSMUSG00000000531	Grasp	34.6396	-1.54704	4.71655e-05	Oocyte
ENSMUSG00000041920	Slc16a6	112.511	-1.77775	4.71655e-05	Oocyte
ENSMUSG00000084847	Gm15507	467.68	0.568861	4.71655e-05	Oocyte
ENSMUSG00000032056	Btg4	27101.6	0.534996	4.80105e-05	Oocyte
ENSMUSG00000037174	Elf2	32.8544	1.10629	4.82842e-05	Oocyte
ENSMUSG00000033382	Trappc8	429.697	-0.872199	4.82937e-05	Oocyte
ENSMUSG00000035992	Fnip1	219.028	-0.817672	4.83677e-05	Oocyte
ENSMUSG00000027086	Fastkd1	307.781	-0.746848	4.85646e-05	Oocyte
ENSMUSG00000021645	Smn1	822.586	0.451065	4.94749e-05	Oocyte
ENSMUSG00000063804	Lin28b	341.722	-0.617108	4.96465e-05	Oocyte
ENSMUSG00000027108	Ola1	139.552	0.875749	4.97775e-05	Oocyte
ENSMUSG00000033953	Ppp3r1	291.363	-0.611479	4.99815e-05	Oocyte
ENSMUSG00000001440	Kpnb1	678.522	-0.401578	5.07425e-05	Oocyte
ENSMUSG00000002845	Tmem39a	735.596	-0.509082	5.12877e-05	Oocyte
ENSMUSG00000017421	Zfp207	885.71	0.417856	5.12877e-05	Oocyte
ENSMUSG00000023169	Slc38a1	6.94946	1.91088	5.12877e-05	Oocyte
ENSMUSG00000035509	Fbxl21	219.541	-1.32376	5.12877e-05	Oocyte
ENSMUSG00000024976	Shoc2	253.631	-0.558437	5.1854e-05	Oocyte
ENSMUSG00000054619	Mettl7a1	86.2083	0.766884	5.20284e-05	Oocyte
ENSMUSG00000037270	4932438A13Rik	786.033	-0.62782	5.26475e-05	Oocyte
ENSMUSG00000043284	Tmem11	170.89	0.750191	5.28185e-05	Oocyte
ENSMUSG00000070837	Aurkc	69.6736	0.841358	5.31805e-05	Oocyte
ENSMUSG00000030530	Furin	1206.11	0.472767	5.31868e-05	Oocyte
ENSMUSG00000029621	Arpc1a	132.187	-1.93042	5.38386e-05	Oocyte
ENSMUSG00000030062	Rpn1	388.896	-0.492115	5.3889e-05	Oocyte
ENSMUSG00000037400	Atp11b	210.343	-1.07754	5.3889e-05	Oocyte
ENSMUSG00000042581	Thsd7b	146.028	-0.598439	5.50396e-05	Oocyte
ENSMUSG00000020111	Micu1	75.3682	0.879927	5.51582e-05	Oocyte
ENSMUSG00000031028	Tub	727.445	0.746788	5.51582e-05	Oocyte
ENSMUSG00000045795	Whamm	454.313	0.621632	5.57472e-05	Oocyte
ENSMUSG00000032018	Sc5d	327.425	-0.520025	5.61096e-05	Oocyte
ENSMUSG00000020519	Sap30l	478.65	0.654272	5.62247e-05	Oocyte
ENSMUSG00000025525	Apool	41.2977	0.925801	5.62261e-05	Oocyte
ENSMUSG00000058057	Mettl7a3	4.92611	1.53713	5.62261e-05	Oocyte
ENSMUSG00000022194	Pabpn1	103.112	0.6162	5.67898e-05	Oocyte
ENSMUSG00000086712	AI427809	6.39923	-1.92955	5.71791e-05	Oocyte
ENSMUSG00000003200	Sh3gl1	32.5117	-1.63458	5.74516e-05	Oocyte
ENSMUSG00000071708	Sms	1634.65	0.349201	5.78378e-05	Oocyte
ENSMUSG00000028214	Gem	32.5211	-1.29972	5.78479e-05	Oocyte
ENSMUSG00000031545	Gpat4	876.823	0.654306	5.87136e-05	Oocyte
ENSMUSG00000034501	Pcnx4	34.9118	1.01386	5.92264e-05	Oocyte
ENSMUSG00000029723	Tsc22d4	373.763	-0.901093	5.92949e-05	Oocyte
ENSMUSG00000027787	Nmd3	2284.17	-0.272334	5.98588e-05	Oocyte
ENSMUSG00000020448	Rnf185	2539.38	0.547385	6.12091e-05	Oocyte
ENSMUSG00000023960	Enpp5	97.1929	-0.711427	6.12091e-05	Oocyte
ENSMUSG00000030017	Reg3g	19.9797	-1.3271	6.12091e-05	Oocyte
ENSMUSG00000085079	Khdc1b	22982.3	0.340033	6.12091e-05	Oocyte
ENSMUSG00000046201	Scaf8	1336.59	0.425907	6.17916e-05	Oocyte
ENSMUSG00000022571	Pycrl	561.515	0.567853	6.19914e-05	Oocyte
ENSMUSG00000014329	Bicc1	381.571	-1.04766	6.20402e-05	Oocyte
ENSMUSG00000040998	Npnt	281.881	-1.69243	6.20402e-05	Oocyte
ENSMUSG00000021577	Sdha	1590.02	0.316132	6.31988e-05	Oocyte
ENSMUSG00000022634	Yaf2	672.681	0.424059	6.33286e-05	Oocyte
ENSMUSG00000021481	Zfp346	581.666	1.48672	6.37678e-05	Oocyte
ENSMUSG00000025439	Clns1a	301.674	1.00881	6.37678e-05	Oocyte
ENSMUSG00000039031	Arhgap18	73.4989	0.768221	6.37678e-05	Oocyte
ENSMUSG00000039105	Atp6v1g1	39.1715	-1.26921	6.37678e-05	Oocyte
ENSMUSG00000075486	Commd6	66.3569	0.812994	6.37678e-05	Oocyte
ENSMUSG00000024410	3110002H16Rik	235.656	0.448925	6.39865e-05	Oocyte
ENSMUSG00000052214	Opa3	406.332	0.634282	6.43045e-05	Oocyte
ENSMUSG00000024791	Cdca5	3708.41	0.770121	6.43499e-05	Oocyte
ENSMUSG00000032536	Trak1	404.602	0.549807	6.48747e-05	Oocyte
ENSMUSG00000100340	Gm28923	11.0807	-1.26502	6.5182e-05	Oocyte
ENSMUSG00000037519	Ppfia1	2185.76	0.443821	6.8304e-05	Oocyte
ENSMUSG00000000701	Tcl1b5	1568.43	0.917637	6.8628e-05	Oocyte
ENSMUSG00000035395	Pet2	13.0913	1.97247	6.8628e-05	Oocyte
ENSMUSG00000034486	Gbx2	200.051	-1.34217	6.90555e-05	Oocyte
ENSMUSG00000037722	Gnpnat1	364.485	-0.423627	6.90555e-05	Oocyte
ENSMUSG00000001376	Vps50	474.645	-0.52302	6.91387e-05	Oocyte
ENSMUSG00000039530	Tusc3	1408.42	0.322866	6.9311e-05	Oocyte
ENSMUSG00000030924	2610020H08Rik	46.6934	1.43161	7.05252e-05	Oocyte
ENSMUSG00000054931	Zkscan4	16.4671	1.05598	7.05252e-05	Oocyte
ENSMUSG00000038895	Zfp653	177.625	0.904228	7.06398e-05	Oocyte
ENSMUSG00000049493	Pls1	723.209	-0.409761	7.06398e-05	Oocyte
ENSMUSG00000074479	Gm10704	370.575	0.487408	7.06398e-05	Oocyte
ENSMUSG00000003134	Tbc1d8	3404.93	0.403592	7.1194e-05	Oocyte
ENSMUSG00000026797	Stxbp1	112.688	-0.774066	7.1194e-05	Oocyte
ENSMUSG00000026974	Zmynd19	503.367	-0.520771	7.1194e-05	Oocyte
ENSMUSG00000028559	Osbpl9	419.757	0.582724	7.1737e-05	Oocyte
ENSMUSG00000052763	Zfp212	983.607	0.583242	7.1737e-05	Oocyte
ENSMUSG00000075566	Krtap4-6	11.4855	-1.67475	7.1737e-05	Oocyte
ENSMUSG00000040855	Reps2	27.415	-1.28275	7.27253e-05	Oocyte
ENSMUSG00000027615	Hps3	11.0235	-1.21584	7.36024e-05	Oocyte
ENSMUSG00000030168	Adipor2	188.896	0.808182	7.43792e-05	Oocyte
ENSMUSG00000026609	Ush2a	83.8985	-0.842305	7.50959e-05	Oocyte
ENSMUSG00000019775	Rgs17	1303.16	0.756535	7.53847e-05	Oocyte
ENSMUSG00000038014	Fam120a	110.226	-0.634975	7.68735e-05	Oocyte
ENSMUSG00000038069	Cdkn2aip	414.441	-0.454392	7.68735e-05	Oocyte
ENSMUSG00000044783	Hjurp	912.16	0.599602	7.69526e-05	Oocyte
ENSMUSG00000019992	Mtfr2	1162.79	-0.618078	7.78921e-05	Oocyte
ENSMUSG00000032076	Cadm1	327.221	0.806161	7.78921e-05	Oocyte
ENSMUSG00000033540	Idua	153.268	-1.4402	7.78921e-05	Oocyte
ENSMUSG00000020098	Pcbd1	431.663	0.647323	7.90818e-05	Oocyte
ENSMUSG00000030491	Tdrd12	141.781	0.74386	8.06707e-05	Oocyte
ENSMUSG00000035376	Hacd2	76.9227	-0.60287	8.08027e-05	Oocyte
ENSMUSG00000026196	Bard1	315.295	0.670278	8.26948e-05	Oocyte
ENSMUSG00000060743	H3f3a	72.5688	-0.901429	8.34614e-05	Oocyte
ENSMUSG00000026799	Med27	5282.05	0.682722	8.49651e-05	Oocyte
ENSMUSG00000018846	Pank3	571.669	-1.00573	8.6317e-05	Oocyte
ENSMUSG00000038236	Hoxa7	736.466	-0.641026	8.63947e-05	Oocyte
ENSMUSG00000029715	Pop7	114.226	0.868238	8.79471e-05	Oocyte
ENSMUSG00000046387	Pcdhb17	19.5886	-1.68239	8.79471e-05	Oocyte
ENSMUSG00000073102	Drc1	80.418	-1.38301	8.79471e-05	Oocyte
ENSMUSG00000066892	Fbxl12	264.73	-0.594878	8.88609e-05	Oocyte
ENSMUSG00000035683	Melk	268.607	0.439768	8.88943e-05	Oocyte
ENSMUSG00000024369	Nelfe	8.23064	-1.88173	9.03034e-05	Oocyte
ENSMUSG00000063935	Zar1	1326	0.477702	9.06585e-05	Oocyte
ENSMUSG00000044037	Als2cl	26.7301	1.56473	9.06952e-05	Oocyte
ENSMUSG00000022500	Litaf	482.675	0.584735	9.12123e-05	Oocyte
ENSMUSG00000048550	Thnsl1	138.061	0.712282	9.17633e-05	Oocyte
ENSMUSG00000020707	Rnf135	111.1	1.49708	9.30658e-05	Oocyte
ENSMUSG00000024924	Vldlr	22.8875	-1.70695	9.35069e-05	Oocyte
ENSMUSG00000020564	Atxn7l1	8.02273	1.66467	9.39798e-05	Oocyte
ENSMUSG00000024145	Pigf	1715.74	0.454094	9.39798e-05	Oocyte
ENSMUSG00000009013	Dynll1	378.067	-0.713848	9.4005e-05	Oocyte
ENSMUSG00000033323	Ctdp1	240.464	0.901477	9.4005e-05	Oocyte
ENSMUSG00000069456	Rdh16	18.8938	-1.79863	9.60355e-05	Oocyte
ENSMUSG00000027220	Syt13	17.4739	-1.91282	9.72824e-05	Oocyte
ENSMUSG00000009291	Pttg1ip	5222.79	0.419431	9.7337e-05	Oocyte
ENSMUSG00000048960	Prex2	555.433	-0.764252	9.7337e-05	Oocyte
ENSMUSG00000081176	H3f3a-ps2	2.11381	-1.88133	9.88077e-05	Oocyte
ENSMUSG00000052798	Nup107	932.175	-0.495759	9.97948e-05	Oocyte
ENSMUSG00000023279	Bmp15	2165.99	-0.854536	0.000103145	Oocyte
ENSMUSG00000024798	Htr7	3.84537	1.58541	0.000104146	Oocyte
ENSMUSG00000034575	Papd7	14175.5	0.340315	0.000104146	Oocyte
ENSMUSG00000054051	Ercc6	56.9988	-1.11511	0.000104975	Oocyte
ENSMUSG00000047881	Rell1	464.411	0.53542	0.00010523	Oocyte
ENSMUSG00000086710	Gm13465	79.6636	0.961928	0.000105439	Oocyte
ENSMUSG00000096276	Gm2042	627.722	0.377414	0.000105628	Oocyte
ENSMUSG00000025261	Huwe1	290.557	-0.917451	0.000105956	Oocyte
ENSMUSG00000038506	Dcun1d2	318.863	0.401434	0.000108479	Oocyte
ENSMUSG00000021871	Pnp	1363.69	-0.566531	0.000110933	Oocyte
ENSMUSG00000010067	Rassf1	51.859	0.75913	0.000111206	Oocyte
ENSMUSG00000032388	Spg21	177.571	0.717801	0.000111206	Oocyte
ENSMUSG00000047842	Diras2	145.308	0.581173	0.000112935	Oocyte
ENSMUSG00000073226	Gm10482	73.3622	-0.783399	0.000112935	Oocyte
ENSMUSG00000021870	Slmap	3013.08	-0.527829	0.000115485	Oocyte
ENSMUSG00000100786	Gm28940	33.7568	-1.23768	0.000116182	Oocyte
ENSMUSG00000028109	Hormad1	271.171	1.32097	0.000117242	Oocyte
ENSMUSG00000036990	Otud4	1112.42	-0.490895	0.000117399	Oocyte
ENSMUSG00000030057	Cnbp	4598.79	0.552325	0.000117947	Oocyte
ENSMUSG00000099922	Gm29016	116.891	-1.05065	0.000117947	Oocyte
ENSMUSG00000019942	Cdk1	140.403	-1.50431	0.000120302	Oocyte
ENSMUSG00000027087	Itgav	26.8555	1.25964	0.000121287	Oocyte
ENSMUSG00000033972	Zfp944	82.7211	-0.782673	0.000125188	Oocyte
ENSMUSG00000031347	Cetn2	44.7232	-1.26687	0.000125426	Oocyte
ENSMUSG00000010721	Lmbr1	851.982	0.335693	0.000125458	Oocyte
ENSMUSG00000025151	Maged1	112.498	-1.25297	0.000125644	Oocyte
ENSMUSG00000028184	Adgrl2	18.4723	-1.33063	0.000125778	Oocyte
ENSMUSG00000034189	Hsdl1	348.922	0.533393	0.000129305	Oocyte
ENSMUSG00000095677	Dynlt1f	7.17841	-1.44373	0.000130446	Oocyte
ENSMUSG00000029474	Rnf34	901.162	0.291997	0.000131967	Oocyte
ENSMUSG00000048485	Zbtb8b	357.629	0.570599	0.000132117	Oocyte
ENSMUSG00000061374	Fiz1	996.105	0.657582	0.000133222	Oocyte
ENSMUSG00000050608	Minos1	207.529	0.651093	0.000135006	Oocyte
ENSMUSG00000023353	Agap3	228.038	-0.741743	0.00013508	Oocyte
ENSMUSG00000020290	Xpo1	360.162	-0.522803	0.000135842	Oocyte
ENSMUSG00000020189	Osbpl8	883.211	-0.661563	0.000136985	Oocyte
ENSMUSG00000002728	Naa20	86.498	-0.973981	0.000137303	Oocyte
ENSMUSG00000022601	Zbtb11	206.647	-0.896384	0.000137926	Oocyte
ENSMUSG00000023931	Efhb	32.399	-1.14364	0.000139671	Oocyte
ENSMUSG00000020978	Klhdc2	3440.59	0.382012	0.000140061	Oocyte
ENSMUSG00000002897	Il17ra	220.549	0.69488	0.000140732	Oocyte
ENSMUSG00000073406	H2-Bl	40.7776	-1.4017	0.000143351	Oocyte
ENSMUSG00000090626	Tex9	118.655	1.10225	0.000143473	Oocyte
ENSMUSG00000040365	Trim41	118.834	-0.839512	0.000143592	Oocyte
ENSMUSG00000068184	Ndufaf2	59.7108	0.82679	0.000143592	Oocyte
ENSMUSG00000020173	Cobl	95.0406	-1.18014	0.000143714	Oocyte
ENSMUSG00000079036	Alkbh1	269.071	0.747032	0.000143714	Oocyte
ENSMUSG00000035266	Helq	922.534	-0.742213	0.000146209	Oocyte
ENSMUSG00000045404	Kcnk13	251.002	0.724152	0.000149671	Oocyte
ENSMUSG00000086353	Gm13481	12.4733	1.10741	0.000152332	Oocyte
ENSMUSG00000032289	Thsd4	103.538	0.538846	0.000152813	Oocyte
ENSMUSG00000025986	Slc39a10	2693.95	0.346272	0.000153633	Oocyte
ENSMUSG00000030322	Mbd4	142.134	-0.780437	0.000154698	Oocyte
ENSMUSG00000024563	Smad2	147.422	-0.972259	0.000155128	Oocyte
ENSMUSG00000059878	Zfp422	10.9217	1.50422	0.000155128	Oocyte
ENSMUSG00000060081	Hist1h2aa	31.3873	-1.07117	0.000155128	Oocyte
ENSMUSG00000063305	Psg20	68.9383	1.52576	0.000155128	Oocyte
ENSMUSG00000025935	Tram1	188.951	-1.26597	0.000159981	Oocyte
ENSMUSG00000048814	Lonrf2	46.9033	1.29055	0.000159981	Oocyte
ENSMUSG00000055065	Ddx17	711.782	0.598467	0.000161594	Oocyte
ENSMUSG00000022124	Fbxl3	454.207	-0.697316	0.000161783	Oocyte
ENSMUSG00000081998	Gm13245	4.95387	-1.70627	0.000161783	Oocyte
ENSMUSG00000054893	Zfp667	8.71227	1.48732	0.000161996	Oocyte
ENSMUSG00000068856	Sf3b4	67.117	0.721025	0.000163259	Oocyte
ENSMUSG00000034278	Dnajc17	31.0191	1.03555	0.000165439	Oocyte
ENSMUSG00000024246	Thumpd2	15.7403	1.13789	0.00016609	Oocyte
ENSMUSG00000020847	Rph3al	821.872	0.605253	0.000166206	Oocyte
ENSMUSG00000004948	Zp3	2435.96	-0.560234	0.000167784	Oocyte
ENSMUSG00000052419	2610001J05Rik	91.3704	0.696432	0.000170104	Oocyte
ENSMUSG00000041716	Gm20604	193.075	1.02461	0.000170684	Oocyte
ENSMUSG00000043091	Tuba1c	228.449	-0.448527	0.000173681	Oocyte
ENSMUSG00000102959	Gm37015	223.921	-0.762389	0.000173681	Oocyte
ENSMUSG00000074682	Zcchc3	389.876	0.373681	0.000173684	Oocyte
ENSMUSG00000081952	Gm12178	137.596	0.457204	0.000174117	Oocyte
ENSMUSG00000028053	Ash1l	57.6531	0.912785	0.000174592	Oocyte
ENSMUSG00000029765	Plxna4	465.678	-0.539934	0.000177292	Oocyte
ENSMUSG00000032396	Dis3l	253.499	-0.833758	0.000177426	Oocyte
ENSMUSG00000032905	Atg12	808.501	-0.608931	0.000177465	Oocyte
ENSMUSG00000093658	Gm20617	48.5025	0.913274	0.000182149	Oocyte
ENSMUSG00000020994	Pnn	822.561	0.342866	0.000182827	Oocyte
ENSMUSG00000025231	Sufu	688.02	0.47442	0.000184645	Oocyte
ENSMUSG00000067161	Gm5560	34.851	-0.712278	0.000186164	Oocyte
ENSMUSG00000035726	Supt16	176.704	-0.552119	0.000187376	Oocyte
ENSMUSG00000036817	Sun1	3395.5	0.292914	0.000187376	Oocyte
ENSMUSG00000071172	Srsf3	327.59	0.377542	0.000188013	Oocyte
ENSMUSG00000020902	Ntn1	65.8726	-0.835743	0.000188384	Oocyte
ENSMUSG00000026107	Nabp1	48.9756	-1.09468	0.000189998	Oocyte
ENSMUSG00000056050	Mia3	857.653	-0.446648	0.000190251	Oocyte
ENSMUSG00000073434	Wdr90	57.8931	0.775881	0.000190661	Oocyte
ENSMUSG00000000605	Clcn4	140.416	1.46771	0.000191926	Oocyte
ENSMUSG00000024319	Vps52	90.9954	-1.61743	0.00019301	Oocyte
ENSMUSG00000036172	Cd200r3	56.0798	1.65385	0.00019362	Oocyte
ENSMUSG00000027778	Ift80	27.8335	-0.918115	0.0001937	Oocyte
ENSMUSG00000099796	Gm7893	12.2305	-1.1648	0.0001937	Oocyte
ENSMUSG00000041515	Irf8	110.283	-1.14844	0.000194801	Oocyte
ENSMUSG00000030556	Lrrc28	1132.52	-0.670305	0.000195096	Oocyte
ENSMUSG00000019978	Epb41l2	1610.84	-0.346063	0.000196213	Oocyte
ENSMUSG00000022130	Tgds	1219.42	0.392006	0.000196816	Oocyte
ENSMUSG00000092152	Gm17026	2.90185	-1.77484	0.000197011	Oocyte
ENSMUSG00000028825	Rhd	290.799	0.51771	0.000197116	Oocyte
ENSMUSG00000029229	Chic2	203.598	0.532019	0.000197116	Oocyte
ENSMUSG00000029632	Ndufa4	310.478	-0.811041	0.000198898	Oocyte
ENSMUSG00000040389	Wdr47	1423.59	0.23239	0.000200636	Oocyte
ENSMUSG00000043668	Tox3	5.80924	-1.87581	0.000203561	Oocyte
ENSMUSG00000014554	Dguok	198.034	0.549535	0.000205529	Oocyte
ENSMUSG00000053441	Adamts19	13.1039	-0.977733	0.000208107	Oocyte
ENSMUSG00000000320	Alox12	314.727	-0.834916	0.000214115	Oocyte
ENSMUSG00000016559	H3f3b	5755.82	0.412869	0.000214297	Oocyte
ENSMUSG00000083465	Gm11652	87.657	-1.09012	0.000214297	Oocyte
ENSMUSG00000045827	Serpinb9	10.2444	-1.21101	0.000216443	Oocyte
ENSMUSG00000028165	Cisd2	282.96	0.358289	0.000217134	Oocyte
ENSMUSG00000020472	Zkscan17	513.086	0.738796	0.00021747	Oocyte
ENSMUSG00000083337	Gm11539	11.4381	-1.37862	0.00021747	Oocyte
ENSMUSG00000039068	Zzz3	401.962	-0.724476	0.000217619	Oocyte
ENSMUSG00000042650	Alkbh5	1606.86	-0.53401	0.000220529	Oocyte
ENSMUSG00000039137	Whrn	32.1139	0.768762	0.000221319	Oocyte
ENSMUSG00000046610	Oacyl	135.54	-0.667546	0.000221995	Oocyte
ENSMUSG00000052997	Uba2	2546.85	0.301203	0.000224528	Oocyte
ENSMUSG00000061436	Hipk2	559.18	0.49086	0.000224528	Oocyte
ENSMUSG00000046441	Cmtr2	278.125	0.460811	0.000224552	Oocyte
ENSMUSG00000085454	Grip1os3	287.202	0.68028	0.000229338	Oocyte
ENSMUSG00000029089	5730480H06Rik	1908.25	0.345952	0.000229514	Oocyte
ENSMUSG00000036241	Ube2r2	902.816	0.91991	0.000229644	Oocyte
ENSMUSG00000025332	Kdm5c	121.289	0.592283	0.000229848	Oocyte
ENSMUSG00000025001	Hells	628.197	-0.466011	0.000233626	Oocyte
ENSMUSG00000038462	Uqcrfs1	39.3245	0.897038	0.000236407	Oocyte
ENSMUSG00000020300	Cpeb4	97.9886	-1.20062	0.000238781	Oocyte
ENSMUSG00000069170	Adgrv1	52.1524	-0.69995	0.000239163	Oocyte
ENSMUSG00000005621	Zfp592	658.505	-0.571408	0.000242869	Oocyte
ENSMUSG00000025982	Sf3b1	5472	0.226112	0.000243491	Oocyte
ENSMUSG00000050747	Trim15	23.0726	1.2704	0.000246659	Oocyte
ENSMUSG00000051098	Mblac2	43.5213	1.04362	0.000251557	Oocyte
ENSMUSG00000101206	Gm5266	3.63758	-1.70641	0.000251557	Oocyte
ENSMUSG00000068245	Phf11d	51.0465	-1.01759	0.000252849	Oocyte
ENSMUSG00000103451	Gm33973	119.644	-0.875034	0.000256467	Oocyte
ENSMUSG00000017801	Mlx	88.3562	-0.743244	0.000262515	Oocyte
ENSMUSG00000058388	Phtf1	379.168	-0.36578	0.000262515	Oocyte
ENSMUSG00000037013	Ss18	1953.63	0.371866	0.000265098	Oocyte
ENSMUSG00000044991	1110034G24Rik	23.9779	1.24679	0.000265434	Oocyte
ENSMUSG00000025245	Lztfl1	117.331	-0.548558	0.000266359	Oocyte
ENSMUSG00000022280	Rnf19a	667.774	0.418458	0.000266556	Oocyte
ENSMUSG00000028607	Cpt2	2674.38	0.579261	0.000267518	Oocyte
ENSMUSG00000032047	Acat1	1129.74	-0.437093	0.000267518	Oocyte
ENSMUSG00000074272	Ceacam1	10.7882	-1.6759	0.000268498	Oocyte
ENSMUSG00000071235	Vrtn	407.81	0.7353	0.000269046	Oocyte
ENSMUSG00000026781	Acbd5	890.154	-0.436995	0.000270416	Oocyte
ENSMUSG00000103433	Gm2272	134.225	0.705341	0.00027043	Oocyte
ENSMUSG00000026970	Rbms1	2.80594	-1.66061	0.000270763	Oocyte
ENSMUSG00000023025	Larp4	513.55	-0.908341	0.000273237	Oocyte
ENSMUSG00000031902	Nfatc3	41.4569	-1.61153	0.000273237	Oocyte
ENSMUSG00000051329	Nup160	285.991	-0.378893	0.000273237	Oocyte
ENSMUSG00000025423	Pias2	694.702	-0.354643	0.000273407	Oocyte
ENSMUSG00000031353	Rbbp7	11567.6	0.217048	0.000273739	Oocyte
ENSMUSG00000031065	Cdk16	702.062	-0.711334	0.000276049	Oocyte
ENSMUSG00000060802	B2m	227.022	0.559704	0.000276049	Oocyte
ENSMUSG00000048583	Igf2	99.0629	-1.2336	0.000277194	Oocyte
ENSMUSG00000033790	Tubgcp5	58.8235	-1.26828	0.000281292	Oocyte
ENSMUSG00000031715	Smarca5	942.25	-0.599856	0.000281361	Oocyte
ENSMUSG00000033918	Parl	1869.98	0.376506	0.000282006	Oocyte
ENSMUSG00000028347	Tmeff1	10.1354	1.81411	0.000282498	Oocyte
ENSMUSG00000032959	Pebp1	194.436	-0.814795	0.000285616	Oocyte
ENSMUSG00000039910	Cited2	27.5218	-0.972566	0.000287483	Oocyte
ENSMUSG00000037570	Mcrs1	569.66	-0.331897	0.000287801	Oocyte
ENSMUSG00000032727	Mier3	2047.12	-0.385835	0.000289155	Oocyte
ENSMUSG00000021792	Fam213a	31.3062	-1.63674	0.000292799	Oocyte
ENSMUSG00000031660	Brd7	2460.59	0.291654	0.000292799	Oocyte
ENSMUSG00000002944	Cd36	165.138	-0.810879	0.000292945	Oocyte
ENSMUSG00000011179	Odc1	817.692	-0.577713	0.000292945	Oocyte
ENSMUSG00000033917	Gde1	276.575	1.24548	0.000293898	Oocyte
ENSMUSG00000032218	Ccnb2	1672.68	-0.306452	0.00029538	Oocyte
ENSMUSG00000049624	Slc17a5	135.558	1.0442	0.000297954	Oocyte
ENSMUSG00000032035	Ets1	6.09412	-1.78906	0.000299314	Oocyte
ENSMUSG00000009549	Srp14	809.183	0.429564	0.000300966	Oocyte
ENSMUSG00000026589	Sec16b	74.4626	-1.82064	0.000301173	Oocyte
ENSMUSG00000042279	H1foo	26914.5	0.46562	0.000305888	Oocyte
ENSMUSG00000046671	Mtfr1l	294.836	-1.25777	0.000305888	Oocyte
ENSMUSG00000005683	Cs	1744.13	-0.465671	0.000307906	Oocyte
ENSMUSG00000068921	Dap3	858.598	0.308669	0.000309929	Oocyte
ENSMUSG00000064210	Ano6	21.8343	1.13693	0.000315278	Oocyte
ENSMUSG00000024429	Gnl1	503.885	0.90234	0.000317261	Oocyte
ENSMUSG00000026383	Epb41l5	586.407	-0.719637	0.000317971	Oocyte
ENSMUSG00000075312	Gm13597	72.8337	0.719071	0.000320975	Oocyte
ENSMUSG00000026421	Csrp1	285.996	0.957465	0.000321078	Oocyte
ENSMUSG00000021945	Zmym2	308.531	-0.57145	0.000324983	Oocyte
ENSMUSG00000015776	Med22	706.82	0.540006	0.000329614	Oocyte
ENSMUSG00000041084	Ostc	200.5	0.781654	0.000329614	Oocyte
ENSMUSG00000008398	Elk3	7.75793	-1.57535	0.000331815	Oocyte
ENSMUSG00000029502	Golga3	143.848	-0.871246	0.00033285	Oocyte
ENSMUSG00000037119	Fam91a1	922.276	-0.512358	0.00033285	Oocyte
ENSMUSG00000026575	Nme7	234.405	0.483347	0.000336672	Oocyte
ENSMUSG00000051674	Dcun1d4	145.31	-0.706064	0.000339237	Oocyte
ENSMUSG00000067547	Gm7666	71.8977	0.615655	0.00034107	Oocyte
ENSMUSG00000004698	Hdac9	46.7416	-0.698507	0.000341708	Oocyte
ENSMUSG00000075595	Zfp652	65.7487	0.766495	0.000342515	Oocyte
ENSMUSG00000020952	Scfd1	128.746	-0.903805	0.000349747	Oocyte
ENSMUSG00000031479	Vps36	19.4945	0.968846	0.000349747	Oocyte
ENSMUSG00000060519	Tor3a	119.763	1.61016	0.000351398	Oocyte
ENSMUSG00000059218	Gm13084	398.861	0.489573	0.00035151	Oocyte
ENSMUSG00000028024	Enpep	41.8505	-1.37577	0.000352592	Oocyte
ENSMUSG00000030911	Zp2	1063.96	-0.611071	0.000352592	Oocyte
ENSMUSG00000031360	Ctps2	157.604	-1.07807	0.000352592	Oocyte
ENSMUSG00000080916	Gm12463	346.718	0.493519	0.000352592	Oocyte
ENSMUSG00000018160	Med1	1352.3	-0.375805	0.000355834	Oocyte
ENSMUSG00000021767	Kat6b	664.876	0.374442	0.000356749	Oocyte
ENSMUSG00000042066	Tmcc2	100.512	-0.804414	0.000359224	Oocyte
ENSMUSG00000042901	Aida	433.703	-0.422072	0.000359224	Oocyte
ENSMUSG00000064293	Cntn4	58.5607	-0.823588	0.000359224	Oocyte
ENSMUSG00000022707	Gbe1	20.2451	-1.14763	0.00035975	Oocyte
ENSMUSG00000028647	Mycbp	84.0066	-0.706381	0.00035975	Oocyte
ENSMUSG00000086316	2210013O21Rik	6.7156	1.3472	0.000360093	Oocyte
ENSMUSG00000064145	Arih2	103.771	-1.22811	0.00036165	Oocyte
ENSMUSG00000042216	Sgsm1	58.3004	-0.810293	0.000361708	Oocyte
ENSMUSG00000025184	R3hcc1l	23.5335	1.07141	0.000369654	Oocyte
ENSMUSG00000056608	Chd9	296.65	0.449601	0.000370357	Oocyte
ENSMUSG00000090631	Olfr456	14.3199	1.44854	0.000371522	Oocyte
ENSMUSG00000020023	Tmcc3	5164.04	-0.301695	0.000371786	Oocyte
ENSMUSG00000020083	2010107G23Rik	9310.87	0.660949	0.000371786	Oocyte
ENSMUSG00000020515	Cnot8	4220.84	0.315443	0.000371786	Oocyte
ENSMUSG00000028293	Slc35a1	243.581	0.413223	0.000373402	Oocyte
ENSMUSG00000031657	Heatr3	202.954	0.936577	0.000373402	Oocyte
ENSMUSG00000094463	Gm8546	14.6896	-1.02235	0.000373402	Oocyte
ENSMUSG00000005370	Msh6	1700.22	0.402199	0.000378274	Oocyte
ENSMUSG00000022338	Eny2	384.005	0.527481	0.000378502	Oocyte
ENSMUSG00000022816	Fstl1	61.0373	1.59028	0.000378885	Oocyte
ENSMUSG00000034573	Ptpn13	513.467	0.728583	0.00038108	Oocyte
ENSMUSG00000032366	Tpm1	28.1934	0.948953	0.000384781	Oocyte
ENSMUSG00000041995	Zbed3	10014	0.539417	0.000384781	Oocyte
ENSMUSG00000022817	Itgb5	924.189	1.36668	0.000387783	Oocyte
ENSMUSG00000027750	Postn	98.6095	-0.973709	0.000388847	Oocyte
ENSMUSG00000034616	Ssh3	61.003	1.27856	0.000391236	Oocyte
ENSMUSG00000098112	Bin2	1522.35	0.464965	0.000394761	Oocyte
ENSMUSG00000024498	Tcerg1	743.842	-0.338886	0.000401747	Oocyte
ENSMUSG00000044340	Phlpp1	8.04176	1.77332	0.000402451	Oocyte
ENSMUSG00000031558	Slit2	4.94897	-1.70724	0.000402853	Oocyte
ENSMUSG00000016319	Slc25a5	457.31	-0.564657	0.000404271	Oocyte
ENSMUSG00000047832	Cdca4	2981.1	0.197212	0.000408177	Oocyte
ENSMUSG00000025370	Cdh9	5.37429	-1.57102	0.000411305	Oocyte
ENSMUSG00000024395	Lims2	36.0884	-1.73903	0.000425583	Oocyte
ENSMUSG00000031864	Ints10	143.531	0.448282	0.000427414	Oocyte
ENSMUSG00000038803	Ost4	33.3531	-1.55055	0.00043888	Oocyte
ENSMUSG00000085865	Gm15966	4.36293	1.75182	0.000440596	Oocyte
ENSMUSG00000044636	Csrnp2	140.656	-1.04307	0.00044418	Oocyte
ENSMUSG00000055717	Slain1	8839.89	0.327916	0.000447891	Oocyte
ENSMUSG00000045989	4930451I11Rik	21.2572	1.38642	0.000449014	Oocyte
ENSMUSG00000011589	Fsd1	537.556	0.683099	0.00045795	Oocyte
ENSMUSG00000041372	B4galnt3	2.23531	1.73034	0.00046252	Oocyte
ENSMUSG00000018166	Erbb3	178.141	1.39482	0.000462977	Oocyte
ENSMUSG00000024063	Lbh	4.12796	-1.77449	0.000462977	Oocyte
ENSMUSG00000038838	Vars2	40.7726	-0.94005	0.00047467	Oocyte
ENSMUSG00000040124	Gorab	58.0492	-1.61797	0.00047467	Oocyte
ENSMUSG00000053477	Tcf4	36.6512	1.21014	0.00047467	Oocyte
ENSMUSG00000064127	Med14	516.744	-0.525729	0.000475133	Oocyte
ENSMUSG00000020916	Krt36	21.033	-1.03486	0.000476361	Oocyte
ENSMUSG00000031586	Rbpms	808.725	0.423315	0.000476621	Oocyte
ENSMUSG00000030680	Pagr1a	10.9882	1.32874	0.000483313	Oocyte
ENSMUSG00000057236	Rbbp4	92.4179	-0.667587	0.000483716	Oocyte
ENSMUSG00000033545	Znrf1	4.77188	1.66131	0.000486193	Oocyte
ENSMUSG00000026771	Spopl	186.646	0.505755	0.00049146	Oocyte
ENSMUSG00000092325	Gm18284	45.0974	-1.356	0.000498737	Oocyte
ENSMUSG00000026705	Klhl20	12.3121	-0.991564	0.000500787	Oocyte
ENSMUSG00000041459	Tardbp	929.008	0.601606	0.000503785	Oocyte
ENSMUSG00000061451	Tmem151a	54.9856	0.768341	0.000504776	Oocyte
ENSMUSG00000028354	Fmn2	1579.9	-0.392516	0.000507458	Oocyte
ENSMUSG00000045662	Henmt1	47.5656	1.23576	0.000508856	Oocyte
ENSMUSG00000073294	AU022751	4115.21	0.575506	0.000512969	Oocyte
ENSMUSG00000057497	Fam136a	4.61856	1.77164	0.00051449	Oocyte
ENSMUSG00000017631	Abr	632.931	-0.478839	0.000518983	Oocyte
ENSMUSG00000040250	Asun	775.466	0.347214	0.000521714	Oocyte
ENSMUSG00000036815	Dpp10	86.7137	-0.858943	0.000522747	Oocyte
ENSMUSG00000022012	Enox1	220.752	-0.561616	0.000529091	Oocyte
ENSMUSG00000040600	Eps8l3	143.621	1.33254	0.000530249	Oocyte
ENSMUSG00000027439	Gzf1	760.617	0.485279	0.000530425	Oocyte
ENSMUSG00000019988	Nedd1	840.751	-0.881267	0.000533904	Oocyte
ENSMUSG00000035129	Gm6781	26.6767	-1.29163	0.000533904	Oocyte
ENSMUSG00000022195	6030458C11Rik	731.41	-0.427719	0.000534255	Oocyte
ENSMUSG00000078439	Smim24	13.7346	1.67373	0.0005361	Oocyte
ENSMUSG00000097599	Gm26678	13.1806	-1.63969	0.000547259	Oocyte
ENSMUSG00000022311	Csmd3	505.65	-0.902485	0.000551698	Oocyte
ENSMUSG00000053626	Tll1	48.2999	-0.738489	0.000551698	Oocyte
ENSMUSG00000026645	Olah	19.1007	-1.1215	0.000556152	Oocyte
ENSMUSG00000056880	Gadl1	2.10563	-1.75302	0.000556152	Oocyte
ENSMUSG00000020087	Tysnd1	103.567	1.44413	0.000560314	Oocyte
ENSMUSG00000073643	Wdfy1	443.487	0.708937	0.000560364	Oocyte
ENSMUSG00000030990	Pgap2	109.456	-0.645084	0.000564018	Oocyte
ENSMUSG00000057156	Homez	8.71152	1.57625	0.000564018	Oocyte
ENSMUSG00000095041	AC149090.1	29.0976	-1.02821	0.000564985	Oocyte
ENSMUSG00000083169	Gm6580	15.5777	-1.31816	0.000566335	Oocyte
ENSMUSG00000038663	Fsd2	34.5478	1.31862	0.000569178	Oocyte
ENSMUSG00000048905	4930539E08Rik	21.9874	1.17972	0.000577277	Oocyte
ENSMUSG00000019689	Fmc1	103.786	0.659388	0.000579896	Oocyte
ENSMUSG00000054102	Nlrp9a	2387.78	-0.397688	0.000579896	Oocyte
ENSMUSG00000032312	Csk	150.202	0.736741	0.000588564	Oocyte
ENSMUSG00000091277	Gm1818	264.891	-0.437167	0.000592303	Oocyte
ENSMUSG00000003273	Car11	15.0877	1.69074	0.000594937	Oocyte
ENSMUSG00000073678	Pgap1	205.299	0.864474	0.000594937	Oocyte
ENSMUSG00000032258	Lca5	63.0261	-0.784806	0.000602197	Oocyte
ENSMUSG00000042688	Mapk6	4106.56	0.393687	0.000602197	Oocyte
ENSMUSG00000042700	Sipa1l1	920.242	-0.530658	0.000602197	Oocyte
ENSMUSG00000090610	Gm3571	8.76116	-1.035	0.000602197	Oocyte
ENSMUSG00000017707	Serinc3	136.732	-0.823445	0.000607226	Oocyte
ENSMUSG00000020464	Pnpt1	25.0656	-0.917843	0.000607226	Oocyte
ENSMUSG00000021268	Meg3	117.051	-0.833985	0.000609385	Oocyte
ENSMUSG00000029916	Agk	65.9213	-0.871334	0.000609385	Oocyte
ENSMUSG00000053716	Dusp7	2110.33	-0.481305	0.000615246	Oocyte
ENSMUSG00000025860	Xiap	262.9	-0.540146	0.000623222	Oocyte
ENSMUSG00000003166	Dgcr2	1666.87	0.543495	0.000624715	Oocyte
ENSMUSG00000030839	Sergef	18.4667	1.31832	0.000625848	Oocyte
ENSMUSG00000021782	Dlg5	1218.87	0.450428	0.000626138	Oocyte
ENSMUSG00000100826	Snhg14	6.4404	-1.11482	0.000632974	Oocyte
ENSMUSG00000027160	Ccdc34	1242.05	0.524091	0.000634514	Oocyte
ENSMUSG00000041571	Selenow	433.865	0.624071	0.000634514	Oocyte
ENSMUSG00000041423	Paqr6	41.2526	-1.14608	0.000636195	Oocyte
ENSMUSG00000028187	Rpf1	331.144	-0.483713	0.000655722	Oocyte
ENSMUSG00000037376	Trmt6	701.73	0.717635	0.000655722	Oocyte
ENSMUSG00000050490	Gm8394	21.1971	-0.916855	0.000657689	Oocyte
ENSMUSG00000015312	Gadd45b	19.7555	-1.54295	0.00065877	Oocyte
ENSMUSG00000020124	Usp15	4379.71	-0.325313	0.000658833	Oocyte
ENSMUSG00000040254	Sema3d	6.00046	-1.35297	0.000660391	Oocyte
ENSMUSG00000018238	Gdf9	38652.7	0.421275	0.00066067	Oocyte
ENSMUSG00000022542	2012-09-01	1.34908	-1.73796	0.00066067	Oocyte
ENSMUSG00000032640	Chsy1	955.18	0.443833	0.000662189	Oocyte
ENSMUSG00000001844	Zdhhc4	15.7828	-1.58629	0.000663485	Oocyte
ENSMUSG00000039145	Camk1d	362.478	-0.337903	0.000663485	Oocyte
ENSMUSG00000083620	Gm15529	52.2497	1.43675	0.000664155	Oocyte
ENSMUSG00000037058	Paip2	306.351	-1.05538	0.00067244	Oocyte
ENSMUSG00000009646	Pla2g12b	51.8345	1.21019	0.000673943	Oocyte
ENSMUSG00000029106	Add1	2373.15	0.257406	0.000673976	Oocyte
ENSMUSG00000000738	Spg7	640.318	-0.668205	0.000674194	Oocyte
ENSMUSG00000052151	Plpp2	51.9721	-1.09332	0.000674504	Oocyte
ENSMUSG00000040021	Lats1	65.2515	0.646584	0.000686152	Oocyte
ENSMUSG00000043943	Naalad2	610.358	-0.511889	0.000686152	Oocyte
ENSMUSG00000028453	Fancg	106.576	0.704336	0.000689896	Oocyte
ENSMUSG00000024764	Naa40	1476.38	0.463642	0.000693348	Oocyte
ENSMUSG00000001525	Tubb5	275.93	-0.662917	0.000693655	Oocyte
ENSMUSG00000037010	Apln	3.28948	-1.73523	0.000694053	Oocyte
ENSMUSG00000020921	Tmem101	35.3449	1.58572	0.000695141	Oocyte
ENSMUSG00000001517	Foxm1	698.501	-0.655181	0.000702725	Oocyte
ENSMUSG00000054408	Spcs3	8.54457	-1.72209	0.000702725	Oocyte
ENSMUSG00000034875	Nudt19	84.0773	-1.11342	0.000704433	Oocyte
ENSMUSG00000006262	Mob1b	480.009	-0.670566	0.000707245	Oocyte
ENSMUSG00000032040	Dcps	229.977	0.401548	0.000708276	Oocyte
ENSMUSG00000021700	Rab3c	21.5961	-1.67644	0.00071014	Oocyte
ENSMUSG00000032044	Rpusd4	1352.45	0.380223	0.000712629	Oocyte
ENSMUSG00000052833	Sae1	144.933	0.941141	0.000712629	Oocyte
ENSMUSG00000064262	Gimap8	4.36741	-1.62739	0.000712629	Oocyte
ENSMUSG00000054136	Adm2	87.4803	0.803848	0.00071841	Oocyte
ENSMUSG00000083705	Gm8624	3.72483	1.60737	0.000720972	Oocyte
ENSMUSG00000038172	Ttc39b	60.6806	0.879384	0.00072122	Oocyte
ENSMUSG00000048970	C1galt1c1	66.1057	1.02902	0.000730854	Oocyte
ENSMUSG00000030629	Zfand6	291.161	-0.686087	0.00073339	Oocyte
ENSMUSG00000049659	Aftph	642.631	-0.624425	0.00073339	Oocyte
ENSMUSG00000026739	Bmi1	3936.95	-0.42177	0.000734998	Oocyte
ENSMUSG00000078365	Mos	187.779	0.801212	0.000740101	Oocyte
ENSMUSG00000078651	Aoc2	12.6	-1.58953	0.000740101	Oocyte
ENSMUSG00000029196	Tada2b	63.6584	0.815057	0.000749442	Oocyte
ENSMUSG00000020883	Fbxl20	277.789	-0.503031	0.000750035	Oocyte
ENSMUSG00000021116	Eif2s1	944.827	0.631315	0.00075038	Oocyte
ENSMUSG00000097373	Gm26877	18.5396	1.40548	0.00075038	Oocyte
ENSMUSG00000002058	Unc119	16.8247	-1.57636	0.000763195	Oocyte
ENSMUSG00000029203	Ube2k	5373.64	0.254122	0.000777911	Oocyte
ENSMUSG00000056342	Usp34	1889.07	-0.379634	0.000777911	Oocyte
ENSMUSG00000002833	Hdgfrp2	308.308	-1.5052	0.000781621	Oocyte
ENSMUSG00000020964	Sel1l	449.827	-0.41239	0.000788865	Oocyte
ENSMUSG00000079588	Tmem182	44.9119	0.891324	0.000789247	Oocyte
ENSMUSG00000100546	Gm29483	149.121	-0.792929	0.000796083	Oocyte
ENSMUSG00000032046	Abhd12	46.267	1.06654	0.000797535	Oocyte
ENSMUSG00000067297	Ifit1bl2	174.091	0.561186	0.000800445	Oocyte
ENSMUSG00000024424	Ttc39c	478.137	0.388881	0.000805065	Oocyte
ENSMUSG00000058729	Lin9	107.337	-0.895706	0.000805065	Oocyte
ENSMUSG00000049891	Gm7984	31.6531	-0.781881	0.000807522	Oocyte
ENSMUSG00000038538	Ubn2	1863.13	0.286303	0.000807681	Oocyte
ENSMUSG00000009647	Mcu	441.182	0.554869	0.00081269	Oocyte
ENSMUSG00000057454	Lypd3	187.592	0.627557	0.000814965	Oocyte
ENSMUSG00000038141	Tmem181a	41.919	0.563004	0.000816464	Oocyte
ENSMUSG00000042046	Dstyk	219.954	0.648965	0.000816464	Oocyte
ENSMUSG00000044502	Bod1	6580.91	0.399628	0.000816464	Oocyte
ENSMUSG00000074059	Fbxw18	3709.01	0.355238	0.000828699	Oocyte
ENSMUSG00000102752	Gm7694	325.526	0.591868	0.000833329	Oocyte
ENSMUSG00000038151	Prdm1	52.3251	-1.14406	0.000833725	Oocyte
ENSMUSG00000086968	4933431E20Rik	36.1527	-0.773328	0.000836594	Oocyte
ENSMUSG00000087288	Gm13061	3.7265	1.54225	0.000836594	Oocyte
ENSMUSG00000028405	Aco1	166.511	-1.11725	0.000842459	Oocyte
ENSMUSG00000042293	Gm5617	14.0873	-1.39602	0.000847844	Oocyte
ENSMUSG00000008958	Vps72	350.803	0.550193	0.000862371	Oocyte
ENSMUSG00000027508	Pag1	162.225	0.823751	0.000870097	Oocyte
ENSMUSG00000001349	Cnn1	309.419	-0.84624	0.000871918	Oocyte
ENSMUSG00000049823	Zbtb12	7.17558	-1.55086	0.000874616	Oocyte
ENSMUSG00000060733	Ipmk	2853.06	-0.385384	0.000874616	Oocyte
ENSMUSG00000068417	Pnp2	87.0701	-0.57217	0.000874616	Oocyte
ENSMUSG00000027804	Ppid	121.291	0.531995	0.000874939	Oocyte
ENSMUSG00000052917	Senp7	43.2439	0.60243	0.000874939	Oocyte
ENSMUSG00000035478	Mbd3	478.582	0.716016	0.000883448	Oocyte
ENSMUSG00000041359	Tcl1	33198.1	0.320889	0.000885343	Oocyte
ENSMUSG00000006301	Tmbim1	1853.19	0.487187	0.000886353	Oocyte
ENSMUSG00000073236	2500004C02Rik	9.56148	-1.61533	0.000886353	Oocyte
ENSMUSG00000096687	Mfsd4b4	355.848	-0.373881	0.000888963	Oocyte
ENSMUSG00000036111	Lmo1	1644.41	0.415842	0.000890412	Oocyte
ENSMUSG00000023940	Sgol1	280.901	-0.557288	0.000901993	Oocyte
ENSMUSG00000004394	Tmed4	12.7646	1.66499	0.000908725	Oocyte
ENSMUSG00000022051	Bnip3l	266.769	-0.547711	0.000910204	Oocyte
ENSMUSG00000041890	Git2	103.984	-0.781554	0.000913814	Oocyte
ENSMUSG00000042363	Lgalsl	280.648	-0.619744	0.000913814	Oocyte
ENSMUSG00000026843	Fubp3	33.0054	-0.702067	0.000914276	Oocyte
ENSMUSG00000022295	Atp6v1c1	454.703	-0.639478	0.000920069	Oocyte
ENSMUSG00000025900	Rp1	12.0276	-1.50932	0.000924472	Oocyte
ENSMUSG00000029822	Osbpl3	2.38793	-1.697	0.000943062	Oocyte
ENSMUSG00000061126	Cyp4f39	62.0438	-1.14366	0.000949608	Oocyte
ENSMUSG00000053604	Rpia	111.479	0.638024	0.000961226	Oocyte
ENSMUSG00000024078	Ttc27	181.863	0.44834	0.00097333	Oocyte
ENSMUSG00000031644	Nek1	677.053	-0.411955	0.000983156	Oocyte
ENSMUSG00000001794	Capns1	133.077	-1.04639	0.000988524	Oocyte
ENSMUSG00000020804	Aanat	6.94097	-1.46593	0.000988524	Oocyte
ENSMUSG00000044068	Zrsr1	7.6661	-1.46142	0.000988524	Oocyte
ENSMUSG00000055884	Fancm	1094.78	-0.509489	0.000988524	Oocyte
ENSMUSG00000026238	Ptma	60.8478	-0.782809	0.00100404	Oocyte
ENSMUSG00000029125	Stx18	16.7584	1.43489	0.00100411	Oocyte
ENSMUSG00000021936	Mapk8	4003.64	0.329854	0.00101046	Oocyte
ENSMUSG00000036206	Sh3bp4	95.2416	-0.847196	0.00101046	Oocyte
ENSMUSG00000039449	Prpf18	221.266	-0.415436	0.00101049	Oocyte
ENSMUSG00000044847	Lsm11	144.38	0.60653	0.00101768	Oocyte
ENSMUSG00000048349	Pou4f1	550.06	-0.331441	0.0010194	Oocyte
ENSMUSG00000052299	Ltn1	238.022	-0.582445	0.0010194	Oocyte
ENSMUSG00000031730	Dhodh	634.052	0.441939	0.00102221	Oocyte
ENSMUSG00000097145	9230114K14Rik	72.9847	0.847682	0.00102258	Oocyte
ENSMUSG00000061232	H2-K1	2075.23	-0.750074	0.00104247	Oocyte
ENSMUSG00000041570	Camsap2	921.681	-0.420704	0.00104266	Oocyte
ENSMUSG00000006715	Gmnn	1687	0.612237	0.00104379	Oocyte
ENSMUSG00000028333	Anp32b	1647.02	-0.462261	0.00104969	Oocyte
ENSMUSG00000010505	Myt1	36.291	-1.01094	0.00105176	Oocyte
ENSMUSG00000062376	Borcs7	26.2122	1.28239	0.00105249	Oocyte
ENSMUSG00000031160	Eras	96.7291	1.0922	0.00105268	Oocyte
ENSMUSG00000048230	Fbxo43	2279.36	0.281175	0.00105268	Oocyte
ENSMUSG00000030515	Tarsl2	41.5115	-1.10762	0.0010551	Oocyte
ENSMUSG00000054753	AU018091	99.4099	1.10987	0.00106369	Oocyte
ENSMUSG00000027900	Dram2	65.9943	-0.548771	0.00106798	Oocyte
ENSMUSG00000046096	BC030336	40.4384	0.765264	0.00106798	Oocyte
ENSMUSG00000102030	Gm29106	7.51562	-1.32161	0.00106798	Oocyte
ENSMUSG00000031107	Rbmx2	242.959	-0.877664	0.00107767	Oocyte
ENSMUSG00000043831	Lysmd4	851.277	0.550143	0.00108299	Oocyte
ENSMUSG00000029431	B3gnt4	40.7151	0.733031	0.00108375	Oocyte
ENSMUSG00000002997	Prkar2b	568.095	-0.41878	0.00109079	Oocyte
ENSMUSG00000062275	Fbxw24	10308.1	0.354078	0.00110157	Oocyte
ENSMUSG00000054477	Kcnn2	120.479	-0.772031	0.00110389	Oocyte
ENSMUSG00000032000	Birc3	3066.39	0.250228	0.00110699	Oocyte
ENSMUSG00000021431	Snrnp48	1532.73	-0.511892	0.00111323	Oocyte
ENSMUSG00000039987	Phtf2	1766.96	-0.492397	0.00111353	Oocyte
ENSMUSG00000028468	Rgp1	83.6464	0.717501	0.00111978	Oocyte
ENSMUSG00000041540	Sox5	8.50808	-1.47347	0.00112043	Oocyte
ENSMUSG00000041014	Nrg3	58.5333	0.660804	0.00112867	Oocyte
ENSMUSG00000018442	Derl2	128.387	-0.486192	0.0011303	Oocyte
ENSMUSG00000020048	Hsp90b1	1686.89	-0.770793	0.0011303	Oocyte
ENSMUSG00000020431	Adcy1	60.2646	-1.50076	0.0011303	Oocyte
ENSMUSG00000020705	Ddx42	215.348	-0.62998	0.0011303	Oocyte
ENSMUSG00000024146	Cript	529.103	0.661628	0.0011303	Oocyte
ENSMUSG00000086899	1600002D24Rik	23.4604	1.01832	0.0011303	Oocyte
ENSMUSG00000061360	Phf5a	829.798	0.54744	0.00113737	Oocyte
ENSMUSG00000038235	F11r	184.593	-1.43276	0.00114394	Oocyte
ENSMUSG00000024335	Brd2	2337.57	-0.363811	0.00114906	Oocyte
ENSMUSG00000035901	Dennd5a	152.677	0.515083	0.00115069	Oocyte
ENSMUSG00000075700	Selenot	1471.13	0.424138	0.00115776	Oocyte
ENSMUSG00000066900	Suds3	240.78	0.612825	0.00116249	Oocyte
ENSMUSG00000026434	Nucks1	330.645	-0.514678	0.00117823	Oocyte
ENSMUSG00000062352	Itgb1bp1	3858.33	0.337798	0.00118668	Oocyte
ENSMUSG00000038909	Kat7	1563.5	0.414847	0.00119719	Oocyte
ENSMUSG00000022855	Senp2	16.3745	-1.31928	0.00120741	Oocyte
ENSMUSG00000055491	Pprc1	157.263	0.721829	0.00120951	Oocyte
ENSMUSG00000020876	Snx11	494.83	0.47904	0.00121482	Oocyte
ENSMUSG00000034333	Zbed4	162.802	0.520502	0.00122066	Oocyte
ENSMUSG00000002748	Baz1b	2286.92	0.312987	0.00123561	Oocyte
ENSMUSG00000034903	Cobll1	453.173	-0.668828	0.00123815	Oocyte
ENSMUSG00000068617	Efcab1	15.3574	-1.63508	0.00123927	Oocyte
ENSMUSG00000024190	Dusp1	942.96	-0.371626	0.00124013	Oocyte
ENSMUSG00000074366	Obox5	7058.29	0.345632	0.00125248	Oocyte
ENSMUSG00000021670	Hmgcr	143.461	-0.727696	0.00125306	Oocyte
ENSMUSG00000026031	Cflar	276.151	-0.806689	0.00125524	Oocyte
ENSMUSG00000056293	Gsdmc2	265.813	-0.577506	0.00125576	Oocyte
ENSMUSG00000026131	Dst	236.687	-0.42436	0.00126237	Oocyte
ENSMUSG00000047501	Cldn4	49.5614	0.955798	0.00126946	Oocyte
ENSMUSG00000031917	Nip7	2238.85	0.354048	0.00127212	Oocyte
ENSMUSG00000020038	Cry1	6065.55	0.277905	0.00127419	Oocyte
ENSMUSG00000020115	Tbk1	23.7906	-0.99452	0.00127419	Oocyte
ENSMUSG00000043410	Hfm1	115.29	-0.899083	0.00127419	Oocyte
ENSMUSG00000024413	Npc1	388.922	0.514824	0.00128202	Oocyte
ENSMUSG00000040540	Gm9770	8.66885	-1.51625	0.00128202	Oocyte
ENSMUSG00000018076	Med13l	1458.51	0.500874	0.00128212	Oocyte
ENSMUSG00000033931	Rbm34	21.4541	-1.48709	0.00128212	Oocyte
ENSMUSG00000031933	Izumo1r	553.987	-0.426314	0.00128355	Oocyte
ENSMUSG00000036438	Calm2	131.237	-1.1299	0.00128355	Oocyte
ENSMUSG00000006941	Eif1b	557.002	-0.56995	0.00129302	Oocyte
ENSMUSG00000043411	Usp48	1013.08	0.418821	0.00129302	Oocyte
ENSMUSG00000060227	Casc4	39.9194	-1.50433	0.00129614	Oocyte
ENSMUSG00000055963	Triqk	353.361	-0.479572	0.00130067	Oocyte
ENSMUSG00000034252	Senp6	1269.94	-0.517521	0.00132478	Oocyte
ENSMUSG00000046519	Golph3l	166.772	-0.573916	0.00132978	Oocyte
ENSMUSG00000076614	Ighg1	55.8198	-0.852626	0.00132978	Oocyte
ENSMUSG00000103305	Gm34068	7.25938	1.43285	0.0013338	Oocyte
ENSMUSG00000030983	Bccip	140.44	-0.491092	0.00134979	Oocyte
ENSMUSG00000064061	Dzip3	451.601	-0.662608	0.00136057	Oocyte
ENSMUSG00000066027	Gm10436	883.87	0.432906	0.00137676	Oocyte
ENSMUSG00000028249	Sdcbp	290.584	0.531875	0.0013806	Oocyte
ENSMUSG00000047648	Fbxo30	366.507	-0.421997	0.00139959	Oocyte
ENSMUSG00000035351	Nup37	831.64	0.307974	0.00141024	Oocyte
ENSMUSG00000028917	Plekhm2	42.1113	1.39747	0.00142	Oocyte
ENSMUSG00000003528	Slc25a1	62.0192	-1.54055	0.00142473	Oocyte
ENSMUSG00000021216	Tubal3	62.6315	0.712484	0.00144875	Oocyte
ENSMUSG00000024036	Slc37a1	227.714	-1.1535	0.00144875	Oocyte
ENSMUSG00000038366	Lasp1	96.8484	-1.06523	0.00144875	Oocyte
ENSMUSG00000058318	Phf21a	33.3555	0.959573	0.00144875	Oocyte
ENSMUSG00000032601	Prkar2a	2286.07	-0.3942	0.00145126	Oocyte
ENSMUSG00000021595	Nsun2	692.944	0.456981	0.00145149	Oocyte
ENSMUSG00000031441	Atp11a	2337.69	0.254294	0.00145149	Oocyte
ENSMUSG00000024099	Ndufv2	61.6945	1.11533	0.00145661	Oocyte
ENSMUSG00000005718	Tfap4	6.89699	-1.34795	0.00145683	Oocyte
ENSMUSG00000031367	Ap1s2	15.6254	-1.12215	0.00145765	Oocyte
ENSMUSG00000063296	Tmem117	360.74	-0.40985	0.00146207	Oocyte
ENSMUSG00000055917	Zfp277	655.007	-0.548748	0.00146428	Oocyte
ENSMUSG00000018427	Ypel2	429.711	-0.616622	0.00147644	Oocyte
ENSMUSG00000020000	Moxd1	24.0553	-1.55608	0.00148208	Oocyte
ENSMUSG00000002900	Lamb1	3592.76	0.45528	0.0014958	Oocyte
ENSMUSG00000039886	Tmem120a	229.73	-1.29436	0.00150308	Oocyte
ENSMUSG00000000538	Tom1l2	1003.61	-0.426674	0.00150877	Oocyte
ENSMUSG00000019818	Cd164	4347.55	-0.297355	0.00151803	Oocyte
ENSMUSG00000042439	Zfp532	326.938	0.520803	0.00152354	Oocyte
ENSMUSG00000002222	Rmnd5a	2503.14	0.293271	0.00152453	Oocyte
ENSMUSG00000047710	Champ1	1644.84	0.35456	0.00152453	Oocyte
ENSMUSG00000049723	Mmp12	53.3289	0.748454	0.0015277	Oocyte
ENSMUSG00000041670	Rims1	488.029	-0.489443	0.00152967	Oocyte
ENSMUSG00000030697	Ppp4c	492.4	-0.568712	0.00153574	Oocyte
ENSMUSG00000035615	Frmpd1	74.7029	0.650329	0.00153576	Oocyte
ENSMUSG00000054280	Prr14l	1254.43	-0.258889	0.00154017	Oocyte
ENSMUSG00000027852	Nras	804.54	0.384836	0.00154413	Oocyte
ENSMUSG00000070565	Rasal2	93.6572	0.645493	0.00156022	Oocyte
ENSMUSG00000043259	Fam13c	1010.26	-0.569198	0.00156783	Oocyte
ENSMUSG00000027472	Pdrg1	68.5854	0.902253	0.00157766	Oocyte
ENSMUSG00000030653	Pde2a	118.378	-1.45757	0.0015785	Oocyte
ENSMUSG00000032418	Me1	1860.63	-0.524824	0.0015785	Oocyte
ENSMUSG00000024045	Akap8	257.324	-0.909386	0.00158409	Oocyte
ENSMUSG00000021282	Eif5	1807.69	-0.460344	0.00158913	Oocyte
ENSMUSG00000029432	Gbas	1303.31	0.557091	0.00159086	Oocyte
ENSMUSG00000060985	Tdrd5	96.2748	-0.686098	0.00159086	Oocyte
ENSMUSG00000018796	Acsl1	214.084	-0.470626	0.00159208	Oocyte
ENSMUSG00000070890	Gm12794	4.67324	-1.50744	0.00159744	Oocyte
ENSMUSG00000040667	Nup88	619.988	-0.533022	0.00159917	Oocyte
ENSMUSG00000059436	Max	425.604	-0.522795	0.00159917	Oocyte
ENSMUSG00000067928	Zfp760	135.51	0.59654	0.00161185	Oocyte
ENSMUSG00000024891	Slc29a2	1791.77	1.24885	0.00161648	Oocyte
ENSMUSG00000031538	Plat	2916.18	0.551784	0.00162635	Oocyte
ENSMUSG00000034848	Ttc21b	2.78964	-1.4997	0.00162849	Oocyte
ENSMUSG00000028830	AU040320	2119.91	-0.34891	0.0016303	Oocyte
ENSMUSG00000034118	Tpst1	116.105	0.907374	0.0016303	Oocyte
ENSMUSG00000030352	Tspan9	591.688	0.543054	0.00164449	Oocyte
ENSMUSG00000039055	Eme1	501.832	0.691438	0.00164449	Oocyte
ENSMUSG00000034574	Daam1	209.949	0.505966	0.00164696	Oocyte
ENSMUSG00000028678	Kif2c	445.551	-0.721459	0.001648	Oocyte
ENSMUSG00000029830	Svopl	123.056	-0.886509	0.001648	Oocyte
ENSMUSG00000019210	Atp6v1e1	115.894	0.840146	0.00165094	Oocyte
ENSMUSG00000034075	Zdhhc5	790.173	0.723665	0.00165255	Oocyte
ENSMUSG00000000823	Zfp512b	310.796	0.493265	0.00169378	Oocyte
ENSMUSG00000037736	Limch1	50.7006	-1.37135	0.00170345	Oocyte
ENSMUSG00000010803	Gabra1	29.2171	-1.1551	0.001716	Oocyte
ENSMUSG00000019975	Ikbip	63.5746	1.42447	0.001716	Oocyte
ENSMUSG00000073399	Trim40	20.123	1.40799	0.00171888	Oocyte
ENSMUSG00000024695	Zfp91	1373.65	-0.299377	0.00172393	Oocyte
ENSMUSG00000030986	Dhx32	816.623	0.250095	0.00172393	Oocyte
ENSMUSG00000067369	Trmt2b	15.2292	1.47008	0.00173249	Oocyte
ENSMUSG00000015027	Galns	164.287	-1.56956	0.0017357	Oocyte
ENSMUSG00000044339	Alkbh2	252.168	0.488505	0.0017357	Oocyte
ENSMUSG00000070462	Mesdc1	9.17072	1.30952	0.0017357	Oocyte
ENSMUSG00000019929	Dcn	47.4601	-1.53519	0.00174439	Oocyte
ENSMUSG00000096576	Oog1	1278.59	0.277488	0.00175334	Oocyte
ENSMUSG00000026288	Inpp5d	20.668	-0.854602	0.00175458	Oocyte
ENSMUSG00000096210	H1f0	386.132	0.603548	0.00175458	Oocyte
ENSMUSG00000001168	Oas1h	487.485	0.381617	0.00175601	Oocyte
ENSMUSG00000034473	Sec22a	640.095	-0.73095	0.00176484	Oocyte
ENSMUSG00000026532	Spta1	8.09244	-1.38801	0.00178049	Oocyte
ENSMUSG00000037857	Nufip2	79.4135	-0.602743	0.00178126	Oocyte
ENSMUSG00000038844	Kif16b	318.167	0.429761	0.00180339	Oocyte
ENSMUSG00000001995	Sipa1l2	504.234	0.451886	0.00180822	Oocyte
ENSMUSG00000001158	Snrnp27	650.003	0.44956	0.00181626	Oocyte
ENSMUSG00000042705	Commd10	17.2727	1.12019	0.00181626	Oocyte
ENSMUSG00000054452	Aes	81.0259	0.899097	0.00181626	Oocyte
ENSMUSG00000043929	Klhl15	117.825	-0.811068	0.00182431	Oocyte
ENSMUSG00000018372	Cep95	207.882	-0.595232	0.00182688	Oocyte
ENSMUSG00000022367	Has2	2.26073	1.60131	0.00182774	Oocyte
ENSMUSG00000060803	Gstp1	46.7578	1.16806	0.00183712	Oocyte
ENSMUSG00000026189	Pecr	2125.31	0.436289	0.00184089	Oocyte
ENSMUSG00000026880	Stom	535.864	0.405066	0.00184089	Oocyte
ENSMUSG00000034317	Trim59	955.755	-0.495843	0.0018411	Oocyte
ENSMUSG00000026492	Tfb2m	180.021	-0.460945	0.00184544	Oocyte
ENSMUSG00000103735	Gm38317	22.3444	1.33377	0.00187263	Oocyte
ENSMUSG00000059434	Gckr	118.408	0.761242	0.00187726	Oocyte
ENSMUSG00000043453	Magea10	78.2303	0.835972	0.00187891	Oocyte
ENSMUSG00000058013	2011-09-01	66.8147	1.10449	0.0018852	Oocyte
ENSMUSG00000019647	Sema6a	21.2669	0.993701	0.00191175	Oocyte
ENSMUSG00000037664	Cdkn1c	14.8312	-1.17813	0.0019303	Oocyte
ENSMUSG00000032397	Tipin	2007.14	0.252035	0.00193506	Oocyte
ENSMUSG00000000440	Pparg	65.4038	-0.603506	0.00194276	Oocyte
ENSMUSG00000026566	Mpzl1	107.88	-0.760464	0.00194801	Oocyte
ENSMUSG00000016495	Plgrkt	22.5027	0.970452	0.00195177	Oocyte
ENSMUSG00000005506	Celf1	403.397	-0.5033	0.00195558	Oocyte
ENSMUSG00000027010	Slc25a12	183.969	-0.617511	0.00197373	Oocyte
ENSMUSG00000042138	Msantd2	224.385	0.517731	0.00197373	Oocyte
ENSMUSG00000089782	Gm3531	529.944	0.601833	0.00197373	Oocyte
ENSMUSG00000032540	Abhd5	180.807	0.602172	0.00198372	Oocyte
ENSMUSG00000042350	Arel1	344.56	-0.36793	0.00199189	Oocyte
ENSMUSG00000001247	Lsr	38.3445	0.619288	0.00199245	Oocyte
ENSMUSG00000027770	Dhx36	352.632	-0.382443	0.00199245	Oocyte
ENSMUSG00000027881	Prpf38b	630.021	0.349836	0.00199245	Oocyte
ENSMUSG00000060373	Hnrnpc	1567.36	0.421996	0.00199245	Oocyte
ENSMUSG00000090235	Gm16244	3.52848	1.50955	0.00199473	Oocyte
ENSMUSG00000020524	Gria1	15.3888	-1.44624	0.00200306	Oocyte
ENSMUSG00000073633	Fbxo36	62.0753	1.24709	0.00200834	Oocyte
ENSMUSG00000081792	Anp32b-ps1	101.172	-0.592359	0.00201506	Oocyte
ENSMUSG00000021831	Ero1l	9.91151	-1.53792	0.00201532	Oocyte
ENSMUSG00000028437	Ubap1	801.005	-0.477846	0.00201532	Oocyte
ENSMUSG00000038095	Sbno1	1317.47	-0.448356	0.00201532	Oocyte
ENSMUSG00000087029	Gm14133	2.73352	1.53292	0.00201532	Oocyte
ENSMUSG00000001542	Ell2	188.506	-1.10837	0.00202827	Oocyte
ENSMUSG00000032263	Bckdhb	30.5077	0.997744	0.00202827	Oocyte
ENSMUSG00000016257	Slmo2	525.16	-0.382052	0.00203338	Oocyte
ENSMUSG00000006205	Htra1	159.165	-1.24984	0.00204196	Oocyte
ENSMUSG00000030357	Fkbp4	65.944	1.32699	0.00204196	Oocyte
ENSMUSG00000022913	Psmg1	200.967	0.548775	0.00205411	Oocyte
ENSMUSG00000028145	Them4	485.75	1.30914	0.00207214	Oocyte
ENSMUSG00000022370	Mrpl13	51.5099	0.915362	0.00207264	Oocyte
ENSMUSG00000020496	Rnf187	939.706	0.308531	0.00208088	Oocyte
ENSMUSG00000049252	Lrp1b	451.933	-0.437811	0.00208088	Oocyte
ENSMUSG00000028851	Nudc	100.51	0.694617	0.00208691	Oocyte
ENSMUSG00000026083	Eif5b	8129.1	0.453254	0.00209666	Oocyte
ENSMUSG00000027202	Slc12a1	26.1654	-1.20257	0.00209838	Oocyte
ENSMUSG00000041592	Sdk2	6.20822	-1.5587	0.00209856	Oocyte
ENSMUSG00000042487	Leo1	1685.33	-0.592004	0.00210796	Oocyte
ENSMUSG00000040253	Gbp7	23.5857	-1.09566	0.00212128	Oocyte
ENSMUSG00000031229	Atrx	4948.26	-0.518889	0.00214058	Oocyte
ENSMUSG00000075045	Gm4981	52.5047	-0.623354	0.00214157	Oocyte
ENSMUSG00000049107	Ntf3	4.4102	-1.58725	0.00214497	Oocyte
ENSMUSG00000039329	Tex19.1	1676.47	0.410226	0.00215371	Oocyte
ENSMUSG00000039546	Ajap1	3.5884	-1.59175	0.00215848	Oocyte
ENSMUSG00000058258	Idi1	4.07115	-1.2122	0.00215848	Oocyte
ENSMUSG00000032633	Flcn	1518.56	0.307312	0.00216261	Oocyte
ENSMUSG00000030814	Bcl7c	496.699	0.754131	0.00220413	Oocyte
ENSMUSG00000037086	Prr32	332.433	0.725604	0.00221521	Oocyte
ENSMUSG00000095913	Gm21844	16.416	1.01519	0.00221521	Oocyte
ENSMUSG00000034868	Myl12b	84.5812	-0.585633	0.00222017	Oocyte
ENSMUSG00000050213	Snip1	565.004	-1.376	0.00222017	Oocyte
ENSMUSG00000093814	Gm9637	34.417	-1.39025	0.00222017	Oocyte
ENSMUSG00000002602	Axl	7.96357	-1.58693	0.00222975	Oocyte
ENSMUSG00000052298	Cdc42se2	12802.5	0.203309	0.00223063	Oocyte
ENSMUSG00000022436	Sh3bp1	456.714	0.572301	0.00223124	Oocyte
ENSMUSG00000047766	Lrrc49	177.359	-0.464556	0.00224867	Oocyte
ENSMUSG00000036002	Fam214b	80.6962	-0.78045	0.002291	Oocyte
ENSMUSG00000023066	Rttn	624.184	-0.742963	0.00229747	Oocyte
ENSMUSG00000052738	Suclg1	34.6567	0.735194	0.00230762	Oocyte
ENSMUSG00000028873	Cdca8	3081.04	0.434223	0.00231276	Oocyte
ENSMUSG00000031822	Gse1	112.909	-0.803535	0.00231415	Oocyte
ENSMUSG00000018830	Myh11	323.618	-0.459703	0.00232884	Oocyte
ENSMUSG00000073176	Zfp449	167.383	0.669544	0.00232884	Oocyte
ENSMUSG00000086008	Gm8817	7.16615	-1.57533	0.00232884	Oocyte
ENSMUSG00000010044	Zmynd10	184.595	-1.06964	0.00232999	Oocyte
ENSMUSG00000027708	Dcun1d1	774.437	0.323971	0.00234369	Oocyte
ENSMUSG00000030269	Mtmr14	7610.22	-0.342174	0.00235082	Oocyte
ENSMUSG00000031162	Gata1	316.702	1.04428	0.00235082	Oocyte
ENSMUSG00000053483	Usp21	2058.83	0.315706	0.00235082	Oocyte
ENSMUSG00000005057	Sh2b2	21.2832	1.34443	0.00235236	Oocyte
ENSMUSG00000040532	Abhd11	834.173	0.537489	0.0023527	Oocyte
ENSMUSG00000027942	4933434E20Rik	169.085	-0.611717	0.00236683	Oocyte
ENSMUSG00000036097	Fam178a	619.067	-0.572975	0.00236683	Oocyte
ENSMUSG00000039016	Timm8b	542.152	0.494995	0.00236683	Oocyte
ENSMUSG00000031788	Kifc3	912.074	0.496944	0.00237649	Oocyte
ENSMUSG00000030029	Lrig1	529.009	-0.498031	0.0023837	Oocyte
ENSMUSG00000025962	Fastkd2	155.25	0.720661	0.00239214	Oocyte
ENSMUSG00000039414	Heatr5b	225.056	-0.859835	0.00241537	Oocyte
ENSMUSG00000018334	Ksr1	328.979	0.660977	0.00241988	Oocyte
ENSMUSG00000022120	Rnf219	81.9978	0.618933	0.00242029	Oocyte
ENSMUSG00000090790	Gm17377	26.2714	-0.707289	0.00242783	Oocyte
ENSMUSG00000021540	Smad5	142.046	0.593323	0.00243022	Oocyte
ENSMUSG00000002808	Epdr1	6.22661	1.37557	0.00243317	Oocyte
ENSMUSG00000049600	Zbtb45	75.3179	0.615367	0.00243317	Oocyte
ENSMUSG00000034906	Ncaph	37.6295	-0.706549	0.0024363	Oocyte
ENSMUSG00000025069	Gsto2	111.474	0.57647	0.00243858	Oocyte
ENSMUSG00000054988	Agtr1b	3.94981	1.55155	0.00243858	Oocyte
ENSMUSG00000082100	Glns-ps1	5.05506	-1.22076	0.00243858	Oocyte
ENSMUSG00000032679	Cd59a	31.5321	0.648428	0.00245245	Oocyte
ENSMUSG00000032740	Ccdc88a	663.56	0.547692	0.00245245	Oocyte
ENSMUSG00000063576	Klhdc3	376.972	-0.980834	0.00245473	Oocyte
ENSMUSG00000044477	Zfand3	215.959	-0.555631	0.00245764	Oocyte
ENSMUSG00000046062	Ppp1r15b	875.461	-0.801128	0.00245764	Oocyte
ENSMUSG00000058248	Kcnh1	509.683	0.626619	0.00248337	Oocyte
ENSMUSG00000015401	Tmem27	26.4826	1.01552	0.00248402	Oocyte
ENSMUSG00000025144	Stra13	234.045	0.709252	0.00248543	Oocyte
ENSMUSG00000063894	Zkscan8	66.8711	-0.590204	0.00248566	Oocyte
ENSMUSG00000002799	Jag2	252.027	-0.621812	0.00248693	Oocyte
ENSMUSG00000020656	Grhl1	85.674	0.565852	0.00248758	Oocyte
ENSMUSG00000017843	Ppp2r5c	2311.53	0.232528	0.00250279	Oocyte
ENSMUSG00000083458	Gm5510	14.5271	-0.965807	0.00250279	Oocyte
ENSMUSG00000021477	Ctsl	12.0548	-1.48735	0.00250932	Oocyte
ENSMUSG00000017491	Rarb	27.4757	-1.48436	0.00251838	Oocyte
ENSMUSG00000084159	Gm12696	291.289	0.48839	0.00252098	Oocyte
ENSMUSG00000037235	Mxd4	962.339	0.328646	0.00252853	Oocyte
ENSMUSG00000040351	Ankib1	133.185	-0.781502	0.00252853	Oocyte
ENSMUSG00000039318	Rab3gap2	503.44	-0.554625	0.00253093	Oocyte
ENSMUSG00000040521	Tsfm	289.69	0.363767	0.0025412	Oocyte
ENSMUSG00000012296	Tjap1	1244.87	0.338864	0.00254322	Oocyte
ENSMUSG00000026663	Atf6	381.051	-0.420807	0.00255432	Oocyte
ENSMUSG00000036661	Dennd3	708.865	-0.499419	0.00256985	Oocyte
ENSMUSG00000038910	Plcl2	104.773	0.69083	0.00256985	Oocyte
ENSMUSG00000026816	Gtf3c5	35.5778	-0.97695	0.00260002	Oocyte
ENSMUSG00000028541	B4galt2	538.276	-0.588075	0.00261193	Oocyte
ENSMUSG00000032293	Ireb2	2224.82	-0.397274	0.00261193	Oocyte
ENSMUSG00000030321	Efcab12	337.662	-1.11768	0.0026124	Oocyte
ENSMUSG00000044066	Cep68	54.0105	0.64911	0.00264378	Oocyte
ENSMUSG00000031565	Fgfr1	162.055	0.533782	0.00265416	Oocyte
ENSMUSG00000025132	Arhgdia	238.608	-0.795518	0.00267892	Oocyte
ENSMUSG00000026399	Cd55	1175.8	-0.749855	0.00269581	Oocyte
ENSMUSG00000031532	Saraf	1177.5	0.414809	0.00270037	Oocyte
ENSMUSG00000016626	Nlrp14	7385.73	-0.453097	0.00270532	Oocyte
ENSMUSG00000025903	Lypla1	472.351	-0.459035	0.00271352	Oocyte
ENSMUSG00000015092	Edf1	20.3064	-1.10182	0.00271899	Oocyte
ENSMUSG00000027397	Slc20a1	1024.69	0.349527	0.00271899	Oocyte
ENSMUSG00000005628	Tmod4	22.9693	-1.50278	0.00273185	Oocyte
ENSMUSG00000045752	Tssc4	74.8867	0.694881	0.00275853	Oocyte
ENSMUSG00000097848	Gm807	3.37281	-1.55343	0.00276334	Oocyte
ENSMUSG00000049489	Fam58b	563.727	0.860083	0.00276439	Oocyte
ENSMUSG00000038544	Inip	282.136	0.447429	0.00276825	Oocyte
ENSMUSG00000021277	Traf3	503.685	0.449382	0.00277352	Oocyte
ENSMUSG00000052369	Tmem106c	39.1336	-0.710096	0.00279135	Oocyte
ENSMUSG00000063661	Krt73	6.00916	-1.48943	0.00279135	Oocyte
ENSMUSG00000078584	AU022252	207.899	-0.810789	0.00279135	Oocyte
ENSMUSG00000017861	Mybl2	317.34	0.463427	0.00279196	Oocyte
ENSMUSG00000055933	Oosp3	9586.06	0.548036	0.00280872	Oocyte
ENSMUSG00000029911	Ssbp1	137.93	0.837947	0.0028092	Oocyte
ENSMUSG00000019471	Cdc37	52.2405	0.902758	0.00281826	Oocyte
ENSMUSG00000098176	Ccdc166	167.75	1.27346	0.00283575	Oocyte
ENSMUSG00000027132	Katnbl1	514.04	-0.398752	0.0028402	Oocyte
ENSMUSG00000063410	Stk24	1925.17	0.300947	0.00284281	Oocyte
ENSMUSG00000020392	Cdkn2aipnl	468.118	0.443642	0.00284336	Oocyte
ENSMUSG00000035958	Tdp2	340.275	-0.692535	0.00284336	Oocyte
ENSMUSG00000015568	Lpl	349.705	0.482388	0.00284972	Oocyte
ENSMUSG00000030747	Dgat2	286.03	-0.542991	0.00284972	Oocyte
ENSMUSG00000030298	Sec13	2517.44	0.301215	0.00285101	Oocyte
ENSMUSG00000021557	Agtpbp1	2495.6	-0.383535	0.00285519	Oocyte
ENSMUSG00000020658	Efr3b	140.941	-0.717343	0.00285654	Oocyte
ENSMUSG00000097039	Pvt1	63.9519	0.813621	0.00286067	Oocyte
ENSMUSG00000028233	Tgs1	287.59	-0.637246	0.00286825	Oocyte
ENSMUSG00000042182	Bend6	8.28914	-1.52869	0.0028862	Oocyte
ENSMUSG00000022415	Syngr1	3.12539	-1.5106	0.00289069	Oocyte
ENSMUSG00000034449	Dhrs11	32.0561	1.37464	0.00289398	Oocyte
ENSMUSG00000002844	Adprh	198.631	0.707925	0.00289576	Oocyte
ENSMUSG00000049115	Agtr1a	50.1659	-1.38634	0.0029019	Oocyte
ENSMUSG00000064063	BC048507	14.6586	-0.971564	0.0029019	Oocyte
ENSMUSG00000029233	Srd5a3	268.993	0.462881	0.00292525	Oocyte
ENSMUSG00000079553	Kifc1	84.4219	-0.551844	0.00293867	Oocyte
ENSMUSG00000083287	Gm13502	2.48112	-1.3554	0.0029506	Oocyte
ENSMUSG00000042978	Sbk1	566.162	0.625267	0.00296474	Oocyte
ENSMUSG00000070572	Trmt112-ps2	141.896	0.559138	0.00298207	Oocyte
ENSMUSG00000028161	Ppp3ca	48.4486	0.596029	0.0029844	Oocyte
ENSMUSG00000028186	Uox	2.93566	-1.54483	0.00298603	Oocyte
ENSMUSG00000028261	Ndufaf4	694.354	0.42346	0.00300735	Oocyte
ENSMUSG00000036061	Smug1	387.33	0.578037	0.00301456	Oocyte
ENSMUSG00000022339	Ebag9	376.599	0.390783	0.00301475	Oocyte
ENSMUSG00000032344	Mb21d1	531.89	0.341939	0.00301475	Oocyte
ENSMUSG00000044633	B530045E10Rik	4.29298	1.27212	0.00301475	Oocyte
ENSMUSG00000033684	Qsox1	82.3429	-0.936459	0.00302416	Oocyte
ENSMUSG00000034401	Spata6	49.1406	-0.854165	0.00302416	Oocyte
ENSMUSG00000045053	Kcng3	11.821	1.40075	0.00302416	Oocyte
ENSMUSG00000014349	Ube2z	744.78	0.456471	0.00304351	Oocyte
ENSMUSG00000043505	Gimap5	15.7684	1.00268	0.003051	Oocyte
ENSMUSG00000028788	Ptp4a2	8231.61	0.333922	0.00305156	Oocyte
ENSMUSG00000051769	Wfdc15a	4.15358	1.49897	0.00305834	Oocyte
ENSMUSG00000032479	Map4	1795.8	0.368602	0.00306132	Oocyte
ENSMUSG00000024276	Zfp397	25.9565	1.2677	0.00306945	Oocyte
ENSMUSG00000040738	Ints8	347.943	-0.363072	0.00307646	Oocyte
ENSMUSG00000029642	Polr1d	287.818	0.609336	0.00310707	Oocyte
ENSMUSG00000031374	Zfp92	118.455	0.504478	0.00310707	Oocyte
ENSMUSG00000017830	Dhx58	4.8816	1.44396	0.00310841	Oocyte
ENSMUSG00000037808	Fam76b	241.099	-0.39095	0.00311013	Oocyte
ENSMUSG00000041124	Msantd4	371.201	-0.357261	0.00311348	Oocyte
ENSMUSG00000081544	Gm13077	10.5324	-0.999413	0.0031278	Oocyte
ENSMUSG00000068323	Slc4a5	130.628	0.535971	0.00313968	Oocyte
ENSMUSG00000021555	Naa35	1520.8	0.190592	0.00314002	Oocyte
ENSMUSG00000057280	Musk	416.794	-0.471595	0.00314071	Oocyte
ENSMUSG00000021115	Vrk1	331.437	-0.366133	0.00314143	Oocyte
ENSMUSG00000046079	Lrrc8d	732.875	-0.334382	0.00316809	Oocyte
ENSMUSG00000024353	Mzb1	1.27277	1.52434	0.00317234	Oocyte
ENSMUSG00000052912	Smarca5-ps	19.6253	-0.741218	0.00318714	Oocyte
ENSMUSG00000024384	Iws1	334.253	-0.637261	0.0031947	Oocyte
ENSMUSG00000087264	Gad1os	1.83918	-1.536	0.00322461	Oocyte
ENSMUSG00000018481	Appbp2	452.052	-0.608471	0.00324475	Oocyte
ENSMUSG00000071342	Lsmem1	9.83486	-1.53494	0.00325352	Oocyte
ENSMUSG00000038349	Plcl1	21.4793	0.813693	0.00326754	Oocyte
ENSMUSG00000031310	Zmym3	146.644	0.584735	0.00330527	Oocyte
ENSMUSG00000045624	Esf1	740.01	-0.686885	0.00330527	Oocyte
ENSMUSG00000021123	Rdh12	359.704	0.46309	0.00331088	Oocyte
ENSMUSG00000072679	D6Ertd474e	1661.47	0.30439	0.00331088	Oocyte
ENSMUSG00000031397	Tktl1	58.6409	1.51031	0.00331192	Oocyte
ENSMUSG00000041923	Nol4	18.3331	-0.797359	0.0033174	Oocyte
ENSMUSG00000074215	Gm10643	67.5033	-1.34989	0.00332837	Oocyte
ENSMUSG00000030364	Clec2h	32.192	-1.2255	0.00334117	Oocyte
ENSMUSG00000026525	Opn3	98.3782	0.525608	0.00334425	Oocyte
ENSMUSG00000034442	Trmt5	61.2748	0.83187	0.00337208	Oocyte
ENSMUSG00000055720	Ubl7	348.637	-0.498609	0.0033733	Oocyte
ENSMUSG00000052406	Rexo4	41.0478	1.42911	0.00337898	Oocyte
ENSMUSG00000022992	Kansl2	210.133	0.480168	0.00338364	Oocyte
ENSMUSG00000043923	Ccdc84	193.068	0.484022	0.00338867	Oocyte
ENSMUSG00000008333	Snrpb2	1292.2	0.568671	0.00339296	Oocyte
ENSMUSG00000029501	Ankle2	740.452	-0.307136	0.00342051	Oocyte
ENSMUSG00000034403	Pja1	29.0042	0.609696	0.00343247	Oocyte
ENSMUSG00000079164	Tlr5	8.28051	1.50251	0.00343314	Oocyte
ENSMUSG00000018554	Ybx2	307.076	-0.606914	0.00343811	Oocyte
ENSMUSG00000039879	Heca	36.0774	-1.19397	0.00345298	Oocyte
ENSMUSG00000029427	Zcchc8	1541.41	0.256019	0.00346835	Oocyte
ENSMUSG00000004233	Wars2	21.8351	0.822968	0.00348253	Oocyte
ENSMUSG00000038759	Nup205	246.218	-0.473868	0.00348317	Oocyte
ENSMUSG00000044005	Gls2	7.71902	1.44869	0.00349592	Oocyte
ENSMUSG00000007892	Rplp1	332.177	-0.827516	0.00349654	Oocyte
ENSMUSG00000071340	Trappc3l	125.201	0.474219	0.00349654	Oocyte
ENSMUSG00000039716	Dock3	60.295	-0.858875	0.00351286	Oocyte
ENSMUSG00000021013	Ttc8	162.44	0.464654	0.0035519	Oocyte
ENSMUSG00000027556	Car1	27.2712	1.32151	0.0035519	Oocyte
ENSMUSG00000063800	Prpf38a	494.563	0.535212	0.0035519	Oocyte
ENSMUSG00000075232	Amd1	402.099	0.295175	0.0035519	Oocyte
ENSMUSG00000027985	Lef1	105.848	0.612843	0.0035527	Oocyte
ENSMUSG00000033952	Aspm	2055.27	-0.525737	0.0035527	Oocyte
ENSMUSG00000022022	Mtrf1	29.021	1.12779	0.0035669	Oocyte
ENSMUSG00000026869	Psmd5	587.371	-0.436256	0.0035669	Oocyte
ENSMUSG00000024663	Rab3il1	184.785	0.879175	0.00357666	Oocyte
ENSMUSG00000030754	Copb1	1547.46	-0.516086	0.00358343	Oocyte
ENSMUSG00000048310	Pskh1	580.562	-0.590739	0.00358856	Oocyte
ENSMUSG00000006010	BC003331	476.565	-0.458205	0.00359905	Oocyte
ENSMUSG00000006456	Rbm14	372.61	0.33744	0.00360428	Oocyte
ENSMUSG00000066979	Bub3	668.659	-0.468503	0.00360589	Oocyte
ENSMUSG00000031652	N4bp1	4152.8	0.249447	0.00360646	Oocyte
ENSMUSG00000096365	Olfr1463	4.89256	1.39223	0.00360646	Oocyte
ENSMUSG00000038822	Hace1	69.6639	-0.627932	0.00362041	Oocyte
ENSMUSG00000038042	Ptpdc1	183.465	0.716904	0.00364268	Oocyte
ENSMUSG00000020235	Fzr1	217.413	-0.990576	0.00364334	Oocyte
ENSMUSG00000031010	Usp9x	1083.12	-0.381046	0.00364334	Oocyte
ENSMUSG00000027238	Frmd5	298.07	-0.36817	0.00364685	Oocyte
ENSMUSG00000003410	Elavl3	2762.98	-0.421692	0.00371738	Oocyte
ENSMUSG00000097086	Gm7672	11.2928	1.06264	0.00371938	Oocyte
ENSMUSG00000030105	Arl8b	1063.56	0.42473	0.00373198	Oocyte
ENSMUSG00000042659	Arrdc4	67.3182	-1.22653	0.00376255	Oocyte
ENSMUSG00000026278	Bok	9.09909	-1.19585	0.00376669	Oocyte
ENSMUSG00000028497	Hacd4	117.63	-0.506219	0.0037708	Oocyte
ENSMUSG00000074997	Pin1rt1	413.245	-0.833185	0.00377454	Oocyte
ENSMUSG00000045004	Spata21	13.796	1.39615	0.00377456	Oocyte
ENSMUSG00000046179	E2f8	33.289	-0.680246	0.00377456	Oocyte
ENSMUSG00000026966	Ssna1	521.173	0.527195	0.00381106	Oocyte
ENSMUSG00000074655	Gm1527	3.73496	-1.50434	0.00382441	Oocyte
ENSMUSG00000042524	Sun2	6.46079	1.41825	0.00382923	Oocyte
ENSMUSG00000041594	Tmtc4	138.039	-0.795748	0.00386492	Oocyte
ENSMUSG00000059493	Nhs	38.7033	-1.24062	0.00386804	Oocyte
ENSMUSG00000081534	Slc48a1	116.262	0.539933	0.00387872	Oocyte
ENSMUSG00000066152	Slc31a2	308.332	0.395268	0.00388486	Oocyte
ENSMUSG00000003746	Man1a	22.3287	-0.767231	0.00389363	Oocyte
ENSMUSG00000033793	Atp6v1h	678.441	-0.282407	0.00390452	Oocyte
ENSMUSG00000042213	Zfand4	9.94769	1.31811	0.00390488	Oocyte
ENSMUSG00000085008	Dbhos	3.62751	-1.46003	0.00390855	Oocyte
ENSMUSG00000041491	Cep78	266.698	0.374488	0.00392083	Oocyte
ENSMUSG00000103346	C230057A21Rik	90.8216	0.612933	0.00392083	Oocyte
ENSMUSG00000066031	Gm13023	3264	0.351457	0.00392125	Oocyte
ENSMUSG00000023067	Cdkn1a	170.941	-0.759104	0.00392397	Oocyte
ENSMUSG00000022292	Rrm2b	1327.99	-0.649122	0.00393171	Oocyte
ENSMUSG00000047509	Gm6776	31.3865	-0.625662	0.00394657	Oocyte
ENSMUSG00000025279	Dnase1l3	3.56781	1.47942	0.00395714	Oocyte
ENSMUSG00000020455	Trim11	553.738	0.262513	0.00395976	Oocyte
ENSMUSG00000026229	Psmd1	5453.79	-0.358843	0.00397123	Oocyte
ENSMUSG00000026158	Ogfrl1	245.869	-0.668034	0.00397128	Oocyte
ENSMUSG00000032030	Cul5	1349.98	-0.419966	0.00398208	Oocyte
ENSMUSG00000015755	Tab2	1466.3	0.332849	0.0039919	Oocyte
ENSMUSG00000038637	Lrrc56	28.4023	-1.36232	0.00399457	Oocyte
ENSMUSG00000024786	Majin	2.72616	1.46417	0.00399498	Oocyte
ENSMUSG00000031153	Gripap1	10.91	1.30793	0.00400879	Oocyte
ENSMUSG00000024601	Isoc1	161.828	0.692486	0.00401929	Oocyte
ENSMUSG00000030844	Rgs10	71.2575	0.660679	0.00401929	Oocyte
ENSMUSG00000061607	Mdc1	76.9386	-0.70745	0.00401929	Oocyte
ENSMUSG00000038546	Ranbp9	4368.58	0.269639	0.00402232	Oocyte
ENSMUSG00000066324	Impad1	11.0353	-1.47634	0.00404341	Oocyte
ENSMUSG00000027808	Serp1	372.279	0.489986	0.00406123	Oocyte
ENSMUSG00000008035	Mid1ip1	13.0462	-1.21991	0.0040638	Oocyte
ENSMUSG00000028558	Calr4	156.69	-0.85828	0.0040638	Oocyte
ENSMUSG00000085808	Gm14718	5.59126	1.44797	0.00406672	Oocyte
ENSMUSG00000021069	Pygl	44.9548	-1.20324	0.00407844	Oocyte
ENSMUSG00000042308	Setd1a	628.534	0.402253	0.00407903	Oocyte
ENSMUSG00000021694	Ercc8	94.7167	-0.882906	0.00408423	Oocyte
ENSMUSG00000017831	Rab5a	961.708	-0.490384	0.00410108	Oocyte
ENSMUSG00000053553	3110082I17Rik	64.9989	0.729052	0.00410108	Oocyte
ENSMUSG00000070709	Zfp974	31.3388	-0.984086	0.00410108	Oocyte
ENSMUSG00000046556	Zfp319	98.9268	0.943465	0.00410268	Oocyte
ENSMUSG00000030591	Psmd8	560.043	0.442762	0.00411715	Oocyte
ENSMUSG00000071862	Lrrtm2	26.5612	0.710306	0.00414385	Oocyte
ENSMUSG00000029148	Nrbp1	617.68	0.509304	0.00415081	Oocyte
ENSMUSG00000040009	Gnaz	237.7	0.700892	0.00415081	Oocyte
ENSMUSG00000049164	Zfp518a	712.626	-0.557825	0.00415081	Oocyte
ENSMUSG00000104299	Gm9924	222.933	-1.14183	0.00416145	Oocyte
ENSMUSG00000032504	Pdcd6ip	628.671	-0.312651	0.004171	Oocyte
ENSMUSG00000041229	Phf8	165.683	-0.426636	0.00418862	Oocyte
ENSMUSG00000046679	C87436	1234.23	0.589898	0.00419885	Oocyte
ENSMUSG00000043811	Rtn4r	231.456	0.736492	0.00422258	Oocyte
ENSMUSG00000061701	Fbxw20	564.157	0.464024	0.00422258	Oocyte
ENSMUSG00000027774	Gfm1	209.895	-0.359743	0.00422887	Oocyte
ENSMUSG00000053600	Zfp472	667.288	0.715494	0.00422887	Oocyte
ENSMUSG00000058685	Vmn2r51	42.473	-0.873157	0.00423346	Oocyte
ENSMUSG00000039523	Cep104	235.26	-0.656516	0.00425003	Oocyte
ENSMUSG00000055148	Klf2	73.3429	1.3403	0.0042581	Oocyte
ENSMUSG00000010607	Pigyl	315.475	0.561521	0.0042586	Oocyte
ENSMUSG00000030256	Bhlhe41	4.37406	1.48039	0.00427855	Oocyte
ENSMUSG00000042814	Mcts2	7.7447	-1.41844	0.00428056	Oocyte
ENSMUSG00000022706	Mrpl40	705.581	0.437784	0.00428448	Oocyte
ENSMUSG00000051177	Plcb1	85.4541	-0.853158	0.00428897	Oocyte
ENSMUSG00000024187	Fam234a	145.58	-1.16038	0.00430546	Oocyte
ENSMUSG00000019894	Slc6a15	883.765	-0.512939	0.00430715	Oocyte
ENSMUSG00000040601	Nlrp4a	2453.31	0.175959	0.00430715	Oocyte
ENSMUSG00000052544	St6galnac3	14.144	-0.958554	0.00432083	Oocyte
ENSMUSG00000029524	Sirt4	330.091	0.405052	0.0043311	Oocyte
ENSMUSG00000020571	Pdia6	547.303	0.358829	0.00434893	Oocyte
ENSMUSG00000082192	Gm14719	13.7657	-1.16199	0.00438967	Oocyte
ENSMUSG00000066571	4931406P16Rik	159.077	-0.841238	0.00442156	Oocyte
ENSMUSG00000029687	Ezh2	6082.45	0.200772	0.00442613	Oocyte
ENSMUSG00000031758	Cdyl2	58.887	-1.27462	0.00442613	Oocyte
ENSMUSG00000035247	Hectd1	5568.78	-0.275458	0.00442613	Oocyte
ENSMUSG00000049940	Pgrmc2	166.466	0.458618	0.00442613	Oocyte
ENSMUSG00000082675	Gm6382	1456.95	0.194936	0.00442613	Oocyte
ENSMUSG00000021051	Ppp2r5e	590.115	-0.467665	0.00443802	Oocyte
ENSMUSG00000025932	Eya1	110.238	-0.642779	0.00444705	Oocyte
ENSMUSG00000057751	Megf6	21.7498	1.24397	0.00447473	Oocyte
ENSMUSG00000022895	Ets2	507.915	0.397514	0.00447496	Oocyte
ENSMUSG00000040818	Dennd6a	256.774	-0.525036	0.00447496	Oocyte
ENSMUSG00000005936	Kctd20	479.426	0.450667	0.00447582	Oocyte
ENSMUSG00000001280	Sp1	271.715	-0.552105	0.00447787	Oocyte
ENSMUSG00000032285	Dnaja4	565.964	-0.357275	0.00452569	Oocyte
ENSMUSG00000042682	Selenok	148.308	-0.469713	0.00453887	Oocyte
ENSMUSG00000040034	Nup43	907.875	0.432636	0.00455613	Oocyte
ENSMUSG00000100347	Gm7895	104.529	0.334298	0.00456077	Oocyte
ENSMUSG00000041607	Mbp	30.4346	-1.17753	0.00458803	Oocyte
ENSMUSG00000071855	Ccdc112	54.2871	0.68854	0.00461111	Oocyte
ENSMUSG00000041199	Rpusd1	49.1594	1.26127	0.00464209	Oocyte
ENSMUSG00000031932	Gpr83	12.272	1.40711	0.00465792	Oocyte
ENSMUSG00000041781	Cpsf2	1194.18	0.324426	0.0046707	Oocyte
ENSMUSG00000056973	Ces1d	3.52459	-1.4725	0.0046861	Oocyte
ENSMUSG00000000214	Th	877.474	0.358714	0.00470885	Oocyte
ENSMUSG00000031754	Nudt21	9.03531	-0.923609	0.00471133	Oocyte
ENSMUSG00000035062	Zc4h2	8.57885	0.899959	0.00471442	Oocyte
ENSMUSG00000017686	Rhot1	5231.92	-0.222159	0.00471739	Oocyte
ENSMUSG00000025626	Phf6	74.2473	-0.597404	0.00472938	Oocyte
ENSMUSG00000047242	Taf9b	238.292	-0.633144	0.00472938	Oocyte
ENSMUSG00000021255	Esrrb	128.183	0.56537	0.00473078	Oocyte
ENSMUSG00000028125	Abca4	61.0241	-1.31517	0.00473604	Oocyte
ENSMUSG00000032346	Ooep	366.193	-0.539197	0.00474404	Oocyte
ENSMUSG00000049439	Cyp20a1	32.0944	-0.569162	0.00474552	Oocyte
ENSMUSG00000042417	Ccno	1719.56	0.335932	0.00478439	Oocyte
ENSMUSG00000067367	Lyar	1929.5	-0.586333	0.00478439	Oocyte
ENSMUSG00000083595	Gm9200	87.0697	-0.555422	0.00478439	Oocyte
ENSMUSG00000022075	Rhobtb2	45.0389	-1.00539	0.00480509	Oocyte
ENSMUSG00000058799	Nap1l1	1313.52	-0.209296	0.00480509	Oocyte
ENSMUSG00000048707	Tprn	368.557	0.725866	0.00481747	Oocyte
ENSMUSG00000038155	Gstp2	12.32	1.00037	0.00485415	Oocyte
ENSMUSG00000087318	Gm12114	7.69797	-1.18883	0.00486211	Oocyte
ENSMUSG00000046721	Rpl14-ps1	175.22	0.616796	0.00489655	Oocyte
ENSMUSG00000027698	Nceh1	3158.85	0.323642	0.00489756	Oocyte
ENSMUSG00000042496	Prdm10	97.5809	0.556822	0.00489756	Oocyte
ENSMUSG00000024072	Yipf4	374.359	-0.686066	0.00492321	Oocyte
ENSMUSG00000024240	Epc1	264.126	0.500238	0.00492321	Oocyte
ENSMUSG00000037410	Tbc1d2b	283.962	0.407338	0.00492321	Oocyte
ENSMUSG00000046463	5930403N24Rik	8.55237	-1.31471	0.00492321	Oocyte
ENSMUSG00000031156	Slc35a2	82.3889	0.621189	0.00495013	Oocyte
ENSMUSG00000021643	Serf1	38.9693	0.629806	0.00495041	Oocyte
ENSMUSG00000028591	Pramef12	4837.08	0.409309	0.00498888	Oocyte
ENSMUSG00000025035	Arl3	519.153	0.438359	0.00499136	Oocyte
ENSMUSG00000022201	Zfr	1456.45	-0.458597	0.00500037	Oocyte
ENSMUSG00000058186	Zfp980	3.47491	-1.22763	0.00502211	Oocyte
ENSMUSG00000035769	Xylb	346.964	1.04581	0.0050348	Oocyte
ENSMUSG00000068154	Insm1	48.9347	-0.98025	0.00503546	Oocyte
ENSMUSG00000025794	Rpl14	104.956	0.650102	0.00503853	Oocyte
ENSMUSG00000004371	Il11	6.41247	1.4411	0.00503953	Oocyte
ENSMUSG00000027746	Ufm1	323.388	0.322022	0.00504948	Oocyte
ENSMUSG00000033419	Snap91	19.2947	-1.13671	0.00508739	Oocyte
ENSMUSG00000001366	Fbxo9	218.76	0.336557	0.0050882	Oocyte
ENSMUSG00000048439	Nupl2	26.764	0.775931	0.00509106	Oocyte
ENSMUSG00000008859	Rala	736.24	0.465746	0.0051184	Oocyte
ENSMUSG00000028669	Pithd1	290.22	0.343238	0.00513181	Oocyte
ENSMUSG00000022474	Pmm1	378.34	0.843506	0.00513708	Oocyte
ENSMUSG00000021660	Btf3	601.397	0.538115	0.00521775	Oocyte
ENSMUSG00000037243	Zfp692	102.07	0.386753	0.00523381	Oocyte
ENSMUSG00000075402	Krt76	29.0402	-1.18988	0.00524656	Oocyte
ENSMUSG00000032612	Usp4	133.463	-0.907563	0.00528555	Oocyte
ENSMUSG00000056429	Tgoln1	707.053	-0.580226	0.00531706	Oocyte
ENSMUSG00000021098	4930447C04Rik	19.8694	-1.46421	0.00531903	Oocyte
ENSMUSG00000030917	Tmem159	14.153	-1.42311	0.00538787	Oocyte
ENSMUSG00000031783	Polr2c	2604.78	0.290837	0.00538787	Oocyte
ENSMUSG00000004668	Abca13	88.1879	-0.540174	0.0054014	Oocyte
ENSMUSG00000025220	Mgea5	135.442	0.510299	0.0054109	Oocyte
ENSMUSG00000042303	Sgsm3	133.99	0.516165	0.00541189	Oocyte
ENSMUSG00000031585	Gtf2e2	193.223	-0.590288	0.00544306	Oocyte
ENSMUSG00000078908	Mon1b	139.731	0.672274	0.00544314	Oocyte
ENSMUSG00000056260	Lrif1	50.4257	-0.66467	0.00544726	Oocyte
ENSMUSG00000042275	Pelo	86.4647	0.582998	0.00545647	Oocyte
ENSMUSG00000027326	Knl1	404.594	-0.558061	0.00551367	Oocyte
ENSMUSG00000055612	Cdca7	118.816	0.590252	0.00554244	Oocyte
ENSMUSG00000020407	Upp1	122.859	-1.23004	0.00556246	Oocyte
ENSMUSG00000029050	Ski	935.133	-0.292685	0.00556246	Oocyte
ENSMUSG00000030979	Uros	40.5981	-0.974066	0.00556246	Oocyte
ENSMUSG00000032462	Pik3cb	91.981	0.765463	0.00556246	Oocyte
ENSMUSG00000029757	Dync1i1	168.133	-0.774909	0.00557836	Oocyte
ENSMUSG00000044715	Gskip	17.4993	1.3692	0.00557836	Oocyte
ENSMUSG00000084938	BB557941	100.939	0.749854	0.00557836	Oocyte
ENSMUSG00000018102	Hist1h2bc	53.153	-0.723603	0.0056142	Oocyte
ENSMUSG00000018930	Ccl4	1.51254	-1.43937	0.00562759	Oocyte
ENSMUSG00000021636	Marveld2	321.778	-0.598814	0.00562975	Oocyte
ENSMUSG00000003279	Dlgap1	115.684	-0.582926	0.00562985	Oocyte
ENSMUSG00000096995	2810029C07Rik	9.13598	-1.4344	0.00565968	Oocyte
ENSMUSG00000013033	Adgrl1	65.7107	1.00805	0.00566055	Oocyte
ENSMUSG00000027454	Gins1	70.529	0.687999	0.00566055	Oocyte
ENSMUSG00000039914	Coq10a	37.7235	0.766921	0.00566055	Oocyte
ENSMUSG00000023272	Creld2	918.344	0.437454	0.0056945	Oocyte
ENSMUSG00000049323	Smcr8	68.1832	0.570133	0.00569606	Oocyte
ENSMUSG00000004364	Cul3	2356.63	-0.366551	0.00570185	Oocyte
ENSMUSG00000015697	Setdb1	279.494	-0.473814	0.00574208	Oocyte
ENSMUSG00000032712	2810474O19Rik	3908.35	-0.334103	0.00574208	Oocyte
ENSMUSG00000046330	Rpl37a	63.2942	0.563832	0.00574208	Oocyte
ENSMUSG00000024863	Mbl2	29.0058	0.827994	0.00575052	Oocyte
ENSMUSG00000029752	Asns	10.9532	-1.38875	0.00580045	Oocyte
ENSMUSG00000021248	Tmed10	289.854	-0.375196	0.00586681	Oocyte
ENSMUSG00000039376	Synpo2l	4.3822	-1.41677	0.00587995	Oocyte
ENSMUSG00000018425	Dhx40	204.028	-0.554768	0.00588063	Oocyte
ENSMUSG00000022744	Cldnd1	78.2804	-0.988567	0.00588063	Oocyte
ENSMUSG00000067017	Gm3608	29.7649	-0.698811	0.00588063	Oocyte
ENSMUSG00000021068	Nin	1979.56	-0.47795	0.00590826	Oocyte
ENSMUSG00000032702	Kank1	7.99739	1.19675	0.00591015	Oocyte
ENSMUSG00000033543	Gtf2a2	1601.27	0.36057	0.00591015	Oocyte
ENSMUSG00000078681	Tm2d3	1917.96	0.525148	0.00591015	Oocyte
ENSMUSG00000041957	Pkp2	44.286	-0.946621	0.00592204	Oocyte
ENSMUSG00000027082	Tfpi	9.93546	1.26887	0.00592225	Oocyte
ENSMUSG00000060534	Dcc	26.191	-1.2751	0.00592435	Oocyte
ENSMUSG00000062075	Lmnb2	51.3034	0.960712	0.00592435	Oocyte
ENSMUSG00000024231	Cul2	361.041	0.370423	0.00593965	Oocyte
ENSMUSG00000028933	Xrcc2	104.426	0.679412	0.005973	Oocyte
ENSMUSG00000081070	Gm13181	142.336	0.332013	0.00597553	Oocyte
ENSMUSG00000034006	Pqlc1	101.457	-0.661892	0.00599797	Oocyte
ENSMUSG00000074412	Gm10689	3.23437	-1.33668	0.00600949	Oocyte
ENSMUSG00000087371	Gm15541	40.0887	1.02797	0.00600949	Oocyte
ENSMUSG00000090035	Galnt4	5.04079	1.3464	0.00601866	Oocyte
ENSMUSG00000021109	Hif1a	502.844	-0.330028	0.00601976	Oocyte
ENSMUSG00000028936	Rpl22	454.266	0.450945	0.00601976	Oocyte
ENSMUSG00000031669	Gins3	1299.08	0.454572	0.00601976	Oocyte
ENSMUSG00000025868	Higd2a	632.657	0.523884	0.00603021	Oocyte
ENSMUSG00000027209	Fam227b	4.92443	1.37002	0.00603675	Oocyte
ENSMUSG00000086066	4930423M02Rik	64.8106	-1.24861	0.00605437	Oocyte
ENSMUSG00000038630	Zkscan16	16.7013	0.80209	0.00615318	Oocyte
ENSMUSG00000090110	Cmc4	99.4517	0.418548	0.00615616	Oocyte
ENSMUSG00000042082	Arsb	15.6576	-1.28842	0.00615727	Oocyte
ENSMUSG00000066149	Cdc26	139.857	0.491584	0.00616115	Oocyte
ENSMUSG00000029283	Cdc7	220.274	0.402815	0.00616299	Oocyte
ENSMUSG00000032657	Fam189b	169.508	-0.75481	0.00616299	Oocyte
ENSMUSG00000036940	Kdm1a	358.785	-0.41304	0.00616503	Oocyte
ENSMUSG00000042229	Rabif	471.846	0.48371	0.00616521	Oocyte
ENSMUSG00000027855	Sycp1	92.5298	1.07392	0.00624	Oocyte
ENSMUSG00000059981	Taok2	135.096	-0.732139	0.00627325	Oocyte
ENSMUSG00000051391	Ywhag	738.272	-0.461299	0.00629164	Oocyte
ENSMUSG00000037818	Abhd18	294.676	0.467696	0.00632622	Oocyte
ENSMUSG00000031819	Emc8	198.595	-0.62446	0.00632857	Oocyte
ENSMUSG00000080818	Gm9434	40.9872	0.668347	0.00635112	Oocyte
ENSMUSG00000014361	Mertk	424.731	0.690611	0.00639063	Oocyte
ENSMUSG00000033740	St18	14.5868	-0.852082	0.00639063	Oocyte
ENSMUSG00000015478	Rnf5	9.13393	-1.07813	0.00643946	Oocyte
ENSMUSG00000024613	Tcof1	1930.63	-0.321227	0.00645299	Oocyte
ENSMUSG00000026558	Uck2	181.212	0.848329	0.00647575	Oocyte
ENSMUSG00000058704	Memo1	1057.94	0.325841	0.00648385	Oocyte
ENSMUSG00000079111	Kdelr2	391.662	0.360224	0.00648402	Oocyte
ENSMUSG00000067578	Cbln4	44.1692	-0.627233	0.00648831	Oocyte
ENSMUSG00000018379	Srsf1	108.033	-0.43195	0.00650564	Oocyte
ENSMUSG00000038112	AW551984	1.45722	1.41177	0.00650686	Oocyte
ENSMUSG00000044617	Zbtb39	127.085	0.620182	0.00652873	Oocyte
ENSMUSG00000086236	5830418P13Rik	9.25148	1.18404	0.00652873	Oocyte
ENSMUSG00000050148	Ubqln2	38.8607	0.841904	0.00656455	Oocyte
ENSMUSG00000034154	Ino80	561.608	-0.403005	0.00660229	Oocyte
ENSMUSG00000032384	Csnk1g1	577.186	0.347443	0.00661812	Oocyte
ENSMUSG00000037458	Azin1	3076.59	-0.292491	0.00661812	Oocyte
ENSMUSG00000039563	2210406O10Rik	100.18	0.45201	0.00662111	Oocyte
ENSMUSG00000068631	Gm7676	4.66261	1.20154	0.00662111	Oocyte
ENSMUSG00000044702	Palb2	204.161	-0.348399	0.00663537	Oocyte
ENSMUSG00000042729	Wdr74	67.5027	-1.31405	0.00666585	Oocyte
ENSMUSG00000040761	Spen	100.438	0.759486	0.00670447	Oocyte
ENSMUSG00000002477	Snrpd1	465.641	0.642982	0.00672868	Oocyte
ENSMUSG00000029449	Rhof	109.602	0.882695	0.00672868	Oocyte
ENSMUSG00000082515	Gm12902	7.16678	-1.28343	0.00672868	Oocyte
ENSMUSG00000009207	Lnpk1	62.8959	-0.888018	0.00675314	Oocyte
ENSMUSG00000025795	Rassf3	611.463	0.297452	0.00675314	Oocyte
ENSMUSG00000043162	Pyurf	2.66639	1.43019	0.00675361	Oocyte
ENSMUSG00000052331	Ankrd44	1717.35	-0.406461	0.00675361	Oocyte
ENSMUSG00000023074	Mospd1	1274.18	-0.386192	0.00677913	Oocyte
ENSMUSG00000021775	Nr1d2	52.1066	-0.95911	0.00678476	Oocyte
ENSMUSG00000087207	Gm13147	47.7583	-0.552308	0.00682749	Oocyte
ENSMUSG00000035984	Nme5	69.6494	-1.19658	0.0068587	Oocyte
ENSMUSG00000034826	Nup54	246.098	-0.588638	0.00686224	Oocyte
ENSMUSG00000008140	Emc10	39.9062	-0.869076	0.00689609	Oocyte
ENSMUSG00000091449	Gm10269	1.42625	-1.42449	0.00691691	Oocyte
ENSMUSG00000026527	Rgs7	15.3613	-1.23272	0.00691789	Oocyte
ENSMUSG00000087203	Gm13986	17.5487	1.37529	0.00691898	Oocyte
ENSMUSG00000031706	Rfx1	52.963	-0.578881	0.00692166	Oocyte
ENSMUSG00000025428	Atp5a1	1644.75	0.417406	0.0069281	Oocyte
ENSMUSG00000064337	mt-Rnr1	12032.2	0.72493	0.0069281	Oocyte
ENSMUSG00000001054	Rmnd5b	247.012	0.997789	0.00695255	Oocyte
ENSMUSG00000056537	Rlim	1887.37	-0.325237	0.00697403	Oocyte
ENSMUSG00000073705	Apitd1	596.668	0.502704	0.00704901	Oocyte
ENSMUSG00000040621	Gemin8	48.5906	-0.566813	0.0070506	Oocyte
ENSMUSG00000034673	Pbx2	103.093	-0.437202	0.00705281	Oocyte
ENSMUSG00000028766	Alpl	12.214	-1.40452	0.00708189	Oocyte
ENSMUSG00000025937	Lactb2	44.5875	-0.583342	0.00714488	Oocyte
ENSMUSG00000037553	Zdhhc18	1060.44	0.482241	0.00714488	Oocyte
ENSMUSG00000001166	Oas1c	1093.06	-0.554104	0.00715236	Oocyte
ENSMUSG00000022723	Crybg3	242.995	0.467284	0.00715512	Oocyte
ENSMUSG00000040822	1700123O20Rik	107.165	1.15	0.00719715	Oocyte
ENSMUSG00000024604	Rbm22	344.667	0.469055	0.00719963	Oocyte
ENSMUSG00000040631	Dok4	248.703	-0.465521	0.00722151	Oocyte
ENSMUSG00000066705	Fxyd6	173.617	-0.880176	0.00722151	Oocyte
ENSMUSG00000026989	Dapl1	18.9955	1.11971	0.00723614	Oocyte
ENSMUSG00000026034	Clk1	5989.4	0.33271	0.00724723	Oocyte
ENSMUSG00000026150	Mff	719.976	-0.624517	0.00725969	Oocyte
ENSMUSG00000042133	Ppig	7185.67	0.336122	0.00726847	Oocyte
ENSMUSG00000061731	Ext1	1907.28	0.272491	0.00729291	Oocyte
ENSMUSG00000045409	Trim39	106.23	0.670484	0.00729741	Oocyte
ENSMUSG00000073542	Cep76	200.815	-0.42923	0.00730571	Oocyte
ENSMUSG00000031105	Slc25a14	609.872	0.355852	0.00733862	Oocyte
ENSMUSG00000040016	Ptger3	46.0254	0.840125	0.00733862	Oocyte
ENSMUSG00000099552	9830004L10Rik	493.42	0.391908	0.00733862	Oocyte
ENSMUSG00000024953	Prdx5	305.477	0.733401	0.0073531	Oocyte
ENSMUSG00000029500	Pgam5	14.5305	-0.692216	0.00736345	Oocyte
ENSMUSG00000032547	Ryk	3827.93	0.213312	0.00736439	Oocyte
ENSMUSG00000097194	9330175E14Rik	74.623	0.715015	0.00738883	Oocyte
ENSMUSG00000045322	Tlr9	11.8994	-1.16434	0.0073904	Oocyte
ENSMUSG00000024457	Trim26	92.3785	0.548455	0.00739584	Oocyte
ENSMUSG00000026932	Nacc2	655.63	0.486361	0.00739584	Oocyte
ENSMUSG00000047045	Tmem164	270.57	-0.60329	0.00739584	Oocyte
ENSMUSG00000028030	Tbck	31.6766	-0.921194	0.00741049	Oocyte
ENSMUSG00000069631	Strada	183.38	-0.617197	0.00742479	Oocyte
ENSMUSG00000086161	Gm15389	10.2831	1.39362	0.00742479	Oocyte
ENSMUSG00000022246	Rai14	609.066	0.315365	0.00744128	Oocyte
ENSMUSG00000027509	Rae1	487.214	0.403423	0.00744128	Oocyte
ENSMUSG00000029209	Gnpda2	708.688	0.35001	0.00744128	Oocyte
ENSMUSG00000082925	Gm13135	33.0548	-0.576625	0.00744808	Oocyte
ENSMUSG00000097248	Gm2694	222.103	-0.584536	0.00745041	Oocyte
ENSMUSG00000044533	Rps2	10.4001	-1.10337	0.00746891	Oocyte
ENSMUSG00000102483	Gm7068	5.66421	-1.09001	0.00747367	Oocyte
ENSMUSG00000026473	Glul	133.92	-1.01067	0.00749922	Oocyte
ENSMUSG00000074482	Gm16589	33.2599	-0.897767	0.00750672	Oocyte
ENSMUSG00000038925	E330034G19Rik	8695.17	0.295161	0.00751534	Oocyte
ENSMUSG00000045205	Dpy19l4	318.489	-0.288998	0.00751974	Oocyte
ENSMUSG00000025227	Mfsd13a	149	1.22711	0.00753653	Oocyte
ENSMUSG00000036943	Rab8b	800.149	0.248229	0.00753753	Oocyte
ENSMUSG00000003099	Ppp5c	125.941	0.584529	0.00754602	Oocyte
ENSMUSG00000064284	Cdpf1	92.7501	-1.19879	0.00759015	Oocyte
ENSMUSG00000036309	Skp1a	554.813	0.914604	0.00760666	Oocyte
ENSMUSG00000022463	Srebf2	108.437	-0.642244	0.00764201	Oocyte
ENSMUSG00000028040	Efna4	114.241	0.678939	0.00764732	Oocyte
ENSMUSG00000041000	Trim62	67.6983	-0.902636	0.00764732	Oocyte
ENSMUSG00000028232	Tmem68	786.741	-0.339101	0.00767813	Oocyte
ENSMUSG00000079737	3110001I22Rik	1178.84	0.213618	0.00768223	Oocyte
ENSMUSG00000053702	Nebl	60.8311	-0.629674	0.0077044	Oocyte
ENSMUSG00000040364	Sec1	11.2894	1.34501	0.00774623	Oocyte
ENSMUSG00000039497	Dse	123.011	0.416492	0.00778144	Oocyte
ENSMUSG00000074746	Pdzd8	110.085	0.463282	0.00778144	Oocyte
ENSMUSG00000010592	Dazl	2581.54	-0.377578	0.00778522	Oocyte
ENSMUSG00000037315	Jade3	209.21	1.37055	0.00778522	Oocyte
ENSMUSG00000041319	Thoc6	171.689	-0.479187	0.00779814	Oocyte
ENSMUSG00000057193	Slc44a2	3119.54	0.429633	0.00779814	Oocyte
ENSMUSG00000035614	Fam179b	1452.31	-0.490392	0.00784689	Oocyte
ENSMUSG00000053289	Ddx10	674.558	-0.371685	0.00786104	Oocyte
ENSMUSG00000028149	Rap1gds1	598.971	-0.412683	0.00789844	Oocyte
ENSMUSG00000026791	Slc2a8	34.7883	-1.05683	0.00790366	Oocyte
ENSMUSG00000078495	Zfp984	72.0574	-0.614846	0.00790366	Oocyte
ENSMUSG00000036977	Anapc10	214.811	0.357456	0.0079305	Oocyte
ENSMUSG00000050121	Opalin	18.3491	-0.759868	0.0079305	Oocyte
ENSMUSG00000009566	Fpgs	4863.98	0.261719	0.00795298	Oocyte
ENSMUSG00000027940	Tpm3	314.304	0.490396	0.00795659	Oocyte
ENSMUSG00000071856	Mcc	373.893	-0.287658	0.00795659	Oocyte
ENSMUSG00000020198	Ap3d1	124.989	-0.768166	0.00800956	Oocyte
ENSMUSG00000045435	Tmem60	815.166	0.427633	0.00801086	Oocyte
ENSMUSG00000003824	Syce2	2667.98	0.261425	0.00801311	Oocyte
ENSMUSG00000024486	Hbegf	521.378	-0.895277	0.00801311	Oocyte
ENSMUSG00000025558	Dock9	1566.1	-0.297987	0.00801311	Oocyte
ENSMUSG00000062190	Lancl2	14.9211	-0.952391	0.00801311	Oocyte
ENSMUSG00000075249	Fsip2	45.2429	-1.31272	0.00801311	Oocyte
ENSMUSG00000026563	Tada1	373.44	0.462155	0.00803084	Oocyte
ENSMUSG00000051176	Zfp42	2.01882	1.4	0.00803584	Oocyte
ENSMUSG00000068452	Duox2	6.87709	-1.23305	0.00803584	Oocyte
ENSMUSG00000020672	Sntg2	155.931	-0.88848	0.00804066	Oocyte
ENSMUSG00000103801	Spin3-ps	134.996	0.4291	0.00807953	Oocyte
ENSMUSG00000038056	Kmt2c	4279.8	-0.273143	0.00810166	Oocyte
ENSMUSG00000022021	Diaph3	392.071	-0.334664	0.00812168	Oocyte
ENSMUSG00000085504	Gm14055	4.69608	1.23733	0.00814589	Oocyte
ENSMUSG00000029389	Ddx55	3767.58	-0.639719	0.00822159	Oocyte
ENSMUSG00000004032	Gstm5	1654.57	-0.442341	0.00822475	Oocyte
ENSMUSG00000056367	Actr3b	14.4992	1.32535	0.00826368	Oocyte
ENSMUSG00000050890	Pdik1l	228.636	0.421883	0.00829846	Oocyte
ENSMUSG00000038943	Prc1	1745.17	-0.5181	0.00830102	Oocyte
ENSMUSG00000001729	Akt1	4023.73	0.280502	0.00832124	Oocyte
ENSMUSG00000020639	Pfn4	73.5952	1.00035	0.00832124	Oocyte
ENSMUSG00000007836	Hnrnpa0	446.414	0.720061	0.00832351	Oocyte
ENSMUSG00000024583	Txnl1	160.071	0.381461	0.00832351	Oocyte
ENSMUSG00000029147	Ppm1g	57.6285	1.21924	0.00832351	Oocyte
ENSMUSG00000029463	Fam216a	23.9088	-0.768294	0.00832351	Oocyte
ENSMUSG00000071655	Ubxn1	146.329	0.896124	0.00832351	Oocyte
ENSMUSG00000039852	Rere	288.362	0.506565	0.00834834	Oocyte
ENSMUSG00000027475	Kif3b	254.829	0.612403	0.00837736	Oocyte
ENSMUSG00000022070	Bora	429.519	0.300011	0.00838544	Oocyte
ENSMUSG00000038351	Sgsm2	126.357	-0.697302	0.00839075	Oocyte
ENSMUSG00000057278	Snrpg	69.4974	0.410981	0.00840548	Oocyte
ENSMUSG00000029407	Uso1	1693.69	-0.303166	0.00840878	Oocyte
ENSMUSG00000041763	Tpp2	120.293	-0.562597	0.00841207	Oocyte
ENSMUSG00000035967	Ints6l	66.941	-1.19321	0.00843867	Oocyte
ENSMUSG00000039578	Ccser1	274.5	-0.444186	0.00844832	Oocyte
ENSMUSG00000052613	Pcdh15	284.811	0.397088	0.00845199	Oocyte
ENSMUSG00000029462	Vps29	192.667	0.413087	0.00845632	Oocyte
ENSMUSG00000025812	Pard3	3381.52	0.317666	0.00846515	Oocyte
ENSMUSG00000031700	Gpt2	828.456	0.314711	0.00847726	Oocyte
ENSMUSG00000031337	Mtm1	26.868	-1.00903	0.0085104	Oocyte
ENSMUSG00000035868	Zfp983	14.4925	-0.936353	0.00851622	Oocyte
ENSMUSG00000048027	Rgmb	49.3856	-0.80539	0.00858449	Oocyte
ENSMUSG00000049792	Bag5	396.563	0.747237	0.00863262	Oocyte
ENSMUSG00000004462	Tbccd1	448.196	0.33025	0.00864795	Oocyte
ENSMUSG00000023249	Parp3	18.9777	-1.37055	0.00864795	Oocyte
ENSMUSG00000045799	Gm9800	22.5414	-0.701885	0.00864795	Oocyte
ENSMUSG00000053593	Fate1	33.1139	-1.24517	0.00864795	Oocyte
ENSMUSG00000038347	Tcte2	126.645	0.592698	0.00867586	Oocyte
ENSMUSG00000038039	Gcc2	680.089	-0.437091	0.00868679	Oocyte
ENSMUSG00000103050	Gm38273	153.159	-0.454818	0.00868892	Oocyte
ENSMUSG00000036167	Pphln1	629.756	-0.591841	0.00870995	Oocyte
ENSMUSG00000027109	Sp3	202.036	-0.743379	0.00872474	Oocyte
ENSMUSG00000078970	Wdr92	321.645	-0.324009	0.0087564	Oocyte
ENSMUSG00000044117	2900011O08Rik	4.83141	1.38932	0.00878723	Oocyte
ENSMUSG00000026683	Nuf2	1252.89	0.248322	0.00880183	Oocyte
ENSMUSG00000002881	Nab1	602.301	-0.418096	0.00883367	Oocyte
ENSMUSG00000028692	Akr1a1	919.884	0.363814	0.00883367	Oocyte
ENSMUSG00000029433	Diablo	72.1061	0.694209	0.00883367	Oocyte
ENSMUSG00000020676	Ccl11	4.17502	-1.38305	0.00891469	Oocyte
ENSMUSG00000029428	Stx2	212.817	-0.562631	0.00891469	Oocyte
ENSMUSG00000050199	Lgr4	45.8253	0.885124	0.0089151	Oocyte
ENSMUSG00000067577	A430093F15Rik	11.9106	-1.05363	0.00898428	Oocyte
ENSMUSG00000076613	Ighg2b	60.0474	-1.24126	0.00903383	Oocyte
ENSMUSG00000024007	Ppil1	53.8619	1.26649	0.00906077	Oocyte
ENSMUSG00000033955	Tnks1bp1	514.218	0.422574	0.00906077	Oocyte
ENSMUSG00000015869	Prpsap1	705.263	0.452779	0.00906207	Oocyte
ENSMUSG00000020069	Hnrnph3	107.872	0.504219	0.00906207	Oocyte
ENSMUSG00000031762	Mt2	8.12178	1.26066	0.00906207	Oocyte
ENSMUSG00000038331	Satb2	102.159	-0.457921	0.00906207	Oocyte
ENSMUSG00000047205	Dusp18	511.967	-0.415296	0.00906207	Oocyte
ENSMUSG00000076615	Ighg3	2.38069	-1.33943	0.00914805	Oocyte
ENSMUSG00000100617	Gm7145	3.35604	-1.12346	0.00920516	Oocyte
ENSMUSG00000022390	Zc3h7b	127.951	-0.528931	0.00921722	Oocyte
ENSMUSG00000050534	Htr5b	10.2646	1.38214	0.00922119	Oocyte
ENSMUSG00000033970	Rfc3	125.978	0.676661	0.00923491	Oocyte
ENSMUSG00000052430	Bmpr1b	740.334	-0.565893	0.00925991	Oocyte
ENSMUSG00000030592	Ryr1	6.19936	-1.35492	0.0092975	Oocyte
ENSMUSG00000042396	Rbm7	156.32	-0.56126	0.00931289	Oocyte
ENSMUSG00000053765	Oas1f	146.972	-1.14321	0.00932649	Oocyte
ENSMUSG00000062554	Gm12751	10.6062	-1.14274	0.00933277	Oocyte
ENSMUSG00000042605	Atxn2	1412.8	-0.403772	0.00948054	Oocyte
ENSMUSG00000027654	Fam83d	937.918	-0.594094	0.00951381	Oocyte
ENSMUSG00000031595	Pdgfrl	120.885	-1.10944	0.00951584	Oocyte
ENSMUSG00000035121	Neil2	14.8002	1.03286	0.00953999	Oocyte
ENSMUSG00000074092	Gm6181	2.59018	1.24638	0.00957584	Oocyte
ENSMUSG00000043289	Mei4	133.179	-0.353123	0.00958973	Oocyte
ENSMUSG00000026933	Camsap1	2518.42	0.267781	0.00961663	Oocyte
ENSMUSG00000050272	Dscam	45.5756	0.99786	0.00961663	Oocyte
ENSMUSG00000071723	Gspt2	244.009	0.319899	0.00961663	Oocyte
ENSMUSG00000022664	Slc35a5	196.282	-0.594284	0.00961924	Oocyte
ENSMUSG00000084113	Gm14277	79.4733	0.733411	0.00964764	Oocyte
ENSMUSG00000056091	St3gal5	39.3677	-0.557463	0.00970578	Oocyte
ENSMUSG00000054814	Usp46	708.536	-0.222799	0.00972973	Oocyte
ENSMUSG00000051910	Sox6	45.9949	-0.831918	0.00973392	Oocyte
ENSMUSG00000021539	Lect2	3.80418	-1.37469	0.00975723	Oocyte
ENSMUSG00000006586	Runx1t1	1082.63	0.403764	0.00976366	Oocyte
ENSMUSG00000038379	Ttk	599.411	0.314757	0.00976366	Oocyte
ENSMUSG00000039936	Pik3cd	330.288	-0.481095	0.00976366	Oocyte
ENSMUSG00000056394	Lig1	35.3911	0.600534	0.00976366	Oocyte
ENSMUSG00000059495	Arhgef12	487.44	0.460479	0.00976366	Oocyte
ENSMUSG00000040488	Ltbp4	138.613	-1.12139	0.00978076	Oocyte
ENSMUSG00000054008	Ndst1	21.2551	0.835064	0.00987954	Oocyte
ENSMUSG00000027332	Ivd	291.511	0.982788	0.00993532	Oocyte
ENSMUSG00000038070	Cntln	412.575	-0.552249	0.00993792	Oocyte
ENSMUSG00000062519	Zfp398	49.1273	1.02073	0.00993792	Oocyte
ENSMUSG00000024248	Cox7a2l	54.3406	0.604074	0.00993966	Oocyte
ENSMUSG00000032295	Man2c1	14.7685	1.27568	0.00993966	Oocyte
ENSMUSG00000055452	Gm7353	146.125	0.406212	0.00998459	Oocyte
ENSMUSG00000021140	Pcnx	398.343	-0.283827	0.0100058	Oocyte
ENSMUSG00000049076	Acap2	319.772	0.381166	0.0100058	Oocyte
ENSMUSG00000007880	Arid1a	7700.45	0.215897	0.0100357	Oocyte
ENSMUSG00000042444	Fam63b	16.8685	0.934054	0.0100357	Oocyte
ENSMUSG00000079845	Xlr4a	32.6521	-0.791767	0.0101066	Oocyte
ENSMUSG00000026594	Ralgps2	3244.37	0.178329	0.0101166	Oocyte
ENSMUSG00000027200	Sema6d	102.42	-0.387675	0.0101342	Oocyte
ENSMUSG00000059842	Zfp341	206.083	0.507133	0.0101342	Oocyte
ENSMUSG00000045007	Tubg2	2074.03	-0.319347	0.01015	Oocyte
ENSMUSG00000032570	Atp2c1	849.687	-0.420017	0.0101893	Oocyte
ENSMUSG00000060126	Tpt1	132.638	-0.664422	0.0101893	Oocyte
ENSMUSG00000026014	Raph1	162.646	-0.439376	0.0102	Oocyte
ENSMUSG00000034064	Poglut1	59.7224	-1.23247	0.0102	Oocyte
ENSMUSG00000021640	Naip1	7.21133	-1.2611	0.0102232	Oocyte
ENSMUSG00000048100	Taf13	810.634	0.390074	0.0102232	Oocyte
ENSMUSG00000070738	Dgkd	801.065	0.297496	0.0102232	Oocyte
ENSMUSG00000073018	Gm1070	8269.85	0.335629	0.0102232	Oocyte
ENSMUSG00000024727	Trpm6	26.2657	1.33485	0.0102341	Oocyte
ENSMUSG00000066839	Ecsit	7.0247	-1.04191	0.0102472	Oocyte
ENSMUSG00000017615	Tnfaip1	1061	0.312801	0.0102678	Oocyte
ENSMUSG00000040820	Hlcs	39.3297	0.714023	0.0103146	Oocyte
ENSMUSG00000054702	Ap1s3	75.988	1.06802	0.0103217	Oocyte
ENSMUSG00000026641	Usf1	87.3485	-0.809259	0.0103419	Oocyte
ENSMUSG00000000056	Narf	32.4095	-0.772054	0.0103466	Oocyte
ENSMUSG00000062110	Scfd2	173.882	-0.403252	0.010349	Oocyte
ENSMUSG00000021990	Spata13	50.3076	0.782143	0.0103806	Oocyte
ENSMUSG00000057836	Xlr3a	94.1039	0.585899	0.0103806	Oocyte
ENSMUSG00000049124	Gm8186	115.623	0.382347	0.0103907	Oocyte
ENSMUSG00000027227	Sord	517.788	0.773034	0.0104509	Oocyte
ENSMUSG00000021932	Rnaseh2b	27.8015	-0.860174	0.0104638	Oocyte
ENSMUSG00000068794	Col28a1	9.89225	-1.29571	0.010477	Oocyte
ENSMUSG00000022105	Rb1	1606.96	-0.505397	0.0105094	Oocyte
ENSMUSG00000027363	Usp8	238.389	-0.663898	0.0105094	Oocyte
ENSMUSG00000037331	Larp1	12.4589	1.24855	0.0105393	Oocyte
ENSMUSG00000097207	6030443J06Rik	18.5757	-0.919807	0.0105536	Oocyte
ENSMUSG00000031176	Dynlt3	890.449	0.324383	0.0105598	Oocyte
ENSMUSG00000081651	Gm15530	10.6418	0.699239	0.0105762	Oocyte
ENSMUSG00000086805	4932443L11Rik	39.2744	0.820472	0.0106451	Oocyte
ENSMUSG00000022708	Zbtb20	82.2078	0.676381	0.010734	Oocyte
ENSMUSG00000067338	Tuba3b	45.4066	-1.34494	0.010734	Oocyte
ENSMUSG00000029575	Mmab	40.788	0.998815	0.010746	Oocyte
ENSMUSG00000033981	Gria2	1.55963	-1.30756	0.010746	Oocyte
ENSMUSG00000033272	Slc35a4	682.457	0.348001	0.0108561	Oocyte
ENSMUSG00000026504	Sdccag8	28.0219	-0.776896	0.0108852	Oocyte
ENSMUSG00000026688	Mgst3	247.845	0.458507	0.0108852	Oocyte
ENSMUSG00000044197	Gpr146	2.56309	-1.30114	0.0108852	Oocyte
ENSMUSG00000019861	Gopc	40.2758	0.500607	0.010898	Oocyte
ENSMUSG00000086222	Gm11665	20.0401	0.862862	0.010939	Oocyte
ENSMUSG00000061969	Gm5581	13.4646	-0.899222	0.0109454	Oocyte
ENSMUSG00000042606	Hirip3	2624.84	0.322065	0.0109515	Oocyte
ENSMUSG00000028256	Odf2l	148.785	-0.785224	0.0110582	Oocyte
ENSMUSG00000031671	Setd6	292.109	0.353642	0.0110582	Oocyte
ENSMUSG00000038425	Poli	108.626	0.583064	0.0110582	Oocyte
ENSMUSG00000039512	Uhrf1bp1	124.686	-0.796577	0.0110731	Oocyte
ENSMUSG00000041241	Mul1	218.009	1.18542	0.0110898	Oocyte
ENSMUSG00000041064	Pif1	49.6428	1.21825	0.011123	Oocyte
ENSMUSG00000041431	Ccnb1	1551.9	0.404855	0.0111361	Oocyte
ENSMUSG00000028274	Rngtt	242.194	0.72185	0.0111942	Oocyte
[truncated: 6,028 more rows]
