# Supplementary material for: Stella modulates transcriptional and endogenous retrovirus programs during maternal-to-zygotic transition
Source: eLife journal article supplement (doi:10.7554/elife.22345), 2017-03-21
Supplement: supp [file elife-22345-supp-v1.zip › elife_poa_e22345_Figure_1_source_data_3.xlsx]

## Sheet: Sheet1
Figure 1 - source data 3. List of maternal transcripts, WT class = ED, which are differentially expressed in KO samples. "E" denotes equally expressed, "D" denotes downregulated or "U" denotes upregulated at a later time point. Adjusted p-value (padj) shows significant differential expression between WT and KO class.
ENSEMBL ID	padj	WT class	KO class
ENSMUSG00000029283	2.38351e-21	ED	ED
ENSMUSG00000036196	1.25771e-13	ED	EU
ENSMUSG00000024969	4.10947e-13	ED	UD
ENSMUSG00000027353	5.62672e-11	ED	EE
ENSMUSG00000063808	2.65697e-10	ED	UD
ENSMUSG00000002748	2.87477e-10	ED	ED
ENSMUSG00000002475	3.87713e-10	ED	DD
ENSMUSG00000022014	3.87713e-10	ED	EE
ENSMUSG00000026196	9.64641e-10	ED	ED
ENSMUSG00000026554	9.64641e-10	ED	ED
ENSMUSG00000006005	1.07263e-09	ED	DD
ENSMUSG00000020849	2.38283e-09	ED	EE
ENSMUSG00000029177	4.04909e-09	ED	ED
ENSMUSG00000036241	5.12274e-09	ED	ED
ENSMUSG00000063406	6.61618e-09	ED	ED
ENSMUSG00000045969	8.43251e-09	ED	ED
ENSMUSG00000053128	1.43548e-08	ED	ED
ENSMUSG00000070923	1.47918e-08	ED	ED
ENSMUSG00000045636	1.72403e-08	ED	EU
ENSMUSG00000032422	1.93062e-08	ED	ED
ENSMUSG00000032254	2.89758e-08	ED	ED
ENSMUSG00000012296	4.86368e-08	ED	ED
ENSMUSG00000022972	1.11263e-07	ED	EE
ENSMUSG00000052763	1.11263e-07	ED	UD
ENSMUSG00000025224	1.34458e-07	ED	UD
ENSMUSG00000028430	1.34458e-07	ED	UD
ENSMUSG00000036478	1.53716e-07	ED	ED
ENSMUSG00000027108	1.71378e-07	ED	EE
ENSMUSG00000024456	1.88238e-07	ED	ED
ENSMUSG00000040359	3.10689e-07	ED	DD
ENSMUSG00000022024	3.36502e-07	ED	ED
ENSMUSG00000034295	3.5693e-07	ED	ED
ENSMUSG00000035234	5.0533e-07	ED	EE
ENSMUSG00000024962	5.59888e-07	ED	EU
ENSMUSG00000025572	6.81798e-07	ED	EU
ENSMUSG00000054200	7.64258e-07	ED	ED
ENSMUSG00000070002	7.64258e-07	ED	UD
ENSMUSG00000028068	8.56559e-07	ED	UD
ENSMUSG00000035325	8.56559e-07	ED	ED
ENSMUSG00000090254	9.79502e-07	ED	EU
ENSMUSG00000033272	9.82102e-07	ED	UD
ENSMUSG00000031730	1.04148e-06	ED	UD
ENSMUSG00000029534	1.08734e-06	ED	ED
ENSMUSG00000048163	1.25256e-06	ED	EU
ENSMUSG00000031697	1.4475e-06	ED	DD
ENSMUSG00000042099	1.46334e-06	ED	EU
ENSMUSG00000027722	1.80063e-06	ED	UU
ENSMUSG00000020130	1.83691e-06	ED	ED
ENSMUSG00000027695	2.82129e-06	ED	DU
ENSMUSG00000025466	3.28604e-06	ED	EU
ENSMUSG00000048833	3.46787e-06	ED	ED
ENSMUSG00000002455	3.89154e-06	ED	UD
ENSMUSG00000037266	4.02307e-06	ED	ED
ENSMUSG00000029089	5.98313e-06	ED	ED
ENSMUSG00000037210	6.57177e-06	ED	UD
ENSMUSG00000029524	7.76786e-06	ED	ED
ENSMUSG00000020167	8.19113e-06	ED	ED
ENSMUSG00000022634	8.89535e-06	ED	ED
ENSMUSG00000001729	9.32304e-06	ED	UD
ENSMUSG00000079555	9.34828e-06	ED	DD
ENSMUSG00000039682	9.57162e-06	ED	EU
ENSMUSG00000026553	9.61564e-06	ED	ED
ENSMUSG00000019845	1.01479e-05	ED	ED
ENSMUSG00000020038	1.06453e-05	ED	ED
ENSMUSG00000038909	1.10864e-05	ED	ED
ENSMUSG00000057637	1.16381e-05	ED	ED
ENSMUSG00000026878	1.29156e-05	ED	ED
ENSMUSG00000025139	1.53665e-05	ED	ED
ENSMUSG00000026313	1.65035e-05	ED	ED
ENSMUSG00000018395	1.74507e-05	ED	UD
ENSMUSG00000028530	1.7475e-05	ED	DE
ENSMUSG00000029687	2.08211e-05	ED	ED
ENSMUSG00000003581	2.20333e-05	ED	ED
ENSMUSG00000025393	2.20333e-05	ED	ED
ENSMUSG00000029814	2.27079e-05	ED	UD
ENSMUSG00000048118	2.27401e-05	ED	UD
ENSMUSG00000039990	2.33379e-05	ED	ED
ENSMUSG00000050812	2.62875e-05	ED	DU
ENSMUSG00000057110	2.71521e-05	ED	ED
ENSMUSG00000059842	2.97427e-05	ED	UD
ENSMUSG00000042632	3.17206e-05	ED	UE
ENSMUSG00000029068	3.3421e-05	ED	UD
ENSMUSG00000032479	3.3421e-05	ED	UD
ENSMUSG00000037697	3.3421e-05	ED	UE
ENSMUSG00000003410	3.4487e-05	ED	UD
ENSMUSG00000012609	3.68313e-05	ED	EE
ENSMUSG00000071379	3.85379e-05	ED	DD
ENSMUSG00000063358	4.01147e-05	ED	UU
ENSMUSG00000063305	4.29257e-05	ED	EU
ENSMUSG00000042138	4.40033e-05	ED	EE
ENSMUSG00000055540	4.46905e-05	ED	EE
ENSMUSG00000014850	4.60661e-05	ED	DE
ENSMUSG00000039000	4.9174e-05	ED	EE
ENSMUSG00000044991	5.32248e-05	ED	EE
ENSMUSG00000038344	6.03202e-05	ED	ED
ENSMUSG00000029423	6.36484e-05	ED	UD
ENSMUSG00000064138	6.56754e-05	ED	EU
ENSMUSG00000078970	6.67212e-05	ED	ED
ENSMUSG00000027624	6.72369e-05	ED	EU
ENSMUSG00000059898	6.75008e-05	ED	EE
ENSMUSG00000018666	7.15464e-05	ED	UD
ENSMUSG00000000976	7.36258e-05	ED	ED
ENSMUSG00000030934	7.43542e-05	ED	UD
ENSMUSG00000040749	7.43542e-05	ED	DD
ENSMUSG00000040829	7.81486e-05	ED	EU
ENSMUSG00000027612	7.91717e-05	ED	ED
ENSMUSG00000007659	8.14625e-05	ED	UE
ENSMUSG00000028093	8.15934e-05	ED	ED
ENSMUSG00000025980	8.79167e-05	ED	UU
ENSMUSG00000053483	9.04165e-05	ED	ED
ENSMUSG00000025403	9.10906e-05	ED	UD
ENSMUSG00000042682	9.14106e-05	ED	ED
ENSMUSG00000026991	0.000101717	ED	EE
ENSMUSG00000025049	0.000105242	ED	EE
ENSMUSG00000030170	0.000118354	ED	EE
ENSMUSG00000038507	0.000118354	ED	UD
ENSMUSG00000041130	0.000118354	ED	UD
ENSMUSG00000055204	0.000118354	ED	UD
ENSMUSG00000072476	0.000118354	ED	ED
ENSMUSG00000025586	0.000122694	ED	UD
ENSMUSG00000031622	0.000140035	ED	ED
ENSMUSG00000027479	0.000168883	ED	ED
ENSMUSG00000001089	0.000177068	ED	ED
ENSMUSG00000016626	0.000178247	ED	EU
ENSMUSG00000058569	0.000188548	ED	UD
ENSMUSG00000022973	0.000191365	ED	ED
ENSMUSG00000038291	0.00020458	ED	ED
ENSMUSG00000049460	0.00020458	ED	ED
ENSMUSG00000020287	0.000229615	ED	ED
ENSMUSG00000040600	0.000229615	ED	ED
ENSMUSG00000025278	0.000237512	ED	ED
ENSMUSG00000030114	0.00024185	ED	EE
ENSMUSG00000027099	0.000263742	ED	DD
ENSMUSG00000024056	0.000269913	ED	ED
ENSMUSG00000005481	0.000307114	ED	ED
ENSMUSG00000042557	0.000313699	ED	DD
ENSMUSG00000030286	0.000346185	ED	UD
ENSMUSG00000055991	0.000346185	ED	EE
ENSMUSG00000054520	0.000346396	ED	EE
ENSMUSG00000058997	0.000363429	ED	UE
ENSMUSG00000031996	0.00036501	ED	ED
ENSMUSG00000089818	0.00036501	ED	EU
ENSMUSG00000002104	0.000367433	ED	EE
ENSMUSG00000037965	0.000368549	ED	EE
ENSMUSG00000039953	0.000368549	ED	ED
ENSMUSG00000038712	0.000368881	ED	UE
ENSMUSG00000038116	0.000373761	ED	UD
ENSMUSG00000057133	0.00038868	ED	UE
ENSMUSG00000003344	0.000419724	ED	UD
ENSMUSG00000026134	0.000419724	ED	ED
ENSMUSG00000032402	0.000419724	ED	ED
ENSMUSG00000043831	0.000427857	ED	UD
ENSMUSG00000020087	0.000432516	ED	EE
ENSMUSG00000032939	0.000447831	ED	ED
ENSMUSG00000039004	0.000451069	ED	EU
ENSMUSG00000030180	0.000458301	ED	DD
ENSMUSG00000052752	0.000458301	ED	ED
ENSMUSG00000039218	0.000474084	ED	ED
ENSMUSG00000035629	0.000480737	ED	UD
ENSMUSG00000069601	0.000513921	ED	EE
ENSMUSG00000016200	0.000515218	ED	UE
ENSMUSG00000003345	0.000544664	ED	ED
ENSMUSG00000021428	0.00054953	ED	ED
ENSMUSG00000034724	0.00054953	ED	DE
ENSMUSG00000021779	0.000562218	ED	ED
ENSMUSG00000008496	0.000562854	ED	UD
ENSMUSG00000087288	0.000568501	ED	EE
ENSMUSG00000045075	0.000569712	ED	EU
ENSMUSG00000035184	0.00059267	ED	UD
ENSMUSG00000026020	0.000593589	ED	UD
ENSMUSG00000029622	0.000593589	ED	ED
ENSMUSG00000045466	0.000599111	ED	ED
ENSMUSG00000020570	0.000602702	ED	DD
ENSMUSG00000022016	0.000623076	ED	EE
ENSMUSG00000072258	0.000623076	ED	UD
ENSMUSG00000037989	0.000630081	ED	UD
ENSMUSG00000022559	0.000639767	ED	ED
ENSMUSG00000054843	0.000639767	ED	EE
ENSMUSG00000096365	0.000639767	ED	EE
ENSMUSG00000046634	0.000643501	ED	EU
ENSMUSG00000024896	0.000666474	ED	ED
ENSMUSG00000052727	0.000666474	ED	ED
ENSMUSG00000028955	0.000676155	ED	ED
ENSMUSG00000024193	0.000711779	ED	ED
ENSMUSG00000038236	0.000732733	ED	ED
ENSMUSG00000000131	0.000738497	ED	EE
ENSMUSG00000021706	0.000738497	ED	EE
ENSMUSG00000034345	0.000738497	ED	UD
ENSMUSG00000075312	0.000753924	ED	UD
ENSMUSG00000016495	0.000755341	ED	ED
ENSMUSG00000039628	0.000827672	ED	EU
ENSMUSG00000020669	0.000837548	ED	ED
ENSMUSG00000046490	0.000843854	ED	EE
ENSMUSG00000061130	0.000847284	ED	ED
ENSMUSG00000024403	0.000859131	ED	EE
ENSMUSG00000037896	0.000936951	ED	ED
ENSMUSG00000021703	0.000945042	ED	ED
ENSMUSG00000037990	0.000951252	ED	EE
ENSMUSG00000031453	0.000959925	ED	ED
ENSMUSG00000030051	0.000964298	ED	EU
ENSMUSG00000055827	0.000967072	ED	EU
ENSMUSG00000021782	0.000976933	ED	ED
ENSMUSG00000038497	0.000986328	ED	ED
ENSMUSG00000097817	0.000997248	ED	EU
ENSMUSG00000050534	0.000997353	ED	UE
ENSMUSG00000036875	0.00100586	ED	ED
ENSMUSG00000048485	0.00100586	ED	UD
ENSMUSG00000031024	0.00102495	ED	EE
ENSMUSG00000035392	0.00102495	ED	EE
ENSMUSG00000022964	0.00103661	ED	ED
ENSMUSG00000085783	0.00108297	ED	ED
ENSMUSG00000024681	0.00108872	ED	EE
ENSMUSG00000027433	0.00110399	ED	ED
ENSMUSG00000006456	0.00112064	ED	UD
ENSMUSG00000040734	0.00112423	ED	UD
ENSMUSG00000024169	0.00115036	ED	UE
ENSMUSG00000093677	0.00116407	ED	DU
ENSMUSG00000004642	0.00116735	ED	ED
ENSMUSG00000032405	0.00120792	ED	EE
ENSMUSG00000026924	0.0012244	ED	UE
ENSMUSG00000022983	0.00123401	ED	ED
ENSMUSG00000004535	0.00123482	ED	ED
ENSMUSG00000098761	0.00124536	ED	UD
ENSMUSG00000029499	0.00127092	ED	DD
ENSMUSG00000004934	0.0012736	ED	DD
ENSMUSG00000032551	0.00128269	ED	ED
ENSMUSG00000026563	0.00130325	ED	ED
ENSMUSG00000101316	0.00135106	ED	DE
ENSMUSG00000037243	0.00135256	ED	ED
ENSMUSG00000060416	0.0013597	ED	UD
ENSMUSG00000028691	0.00139245	ED	ED
ENSMUSG00000030284	0.00139443	ED	EE
ENSMUSG00000043602	0.00141178	ED	EE
ENSMUSG00000086213	0.00146986	ED	EE
ENSMUSG00000097821	0.00148475	ED	EU
ENSMUSG00000027381	0.00149349	ED	ED
ENSMUSG00000001333	0.00150047	ED	EU
ENSMUSG00000022020	0.00150138	ED	ED
ENSMUSG00000022849	0.00150138	ED	EU
ENSMUSG00000030595	0.00150138	ED	ED
ENSMUSG00000103845	0.00150704	ED	ED
ENSMUSG00000026245	0.00151057	ED	ED
ENSMUSG00000031826	0.00158485	ED	UD
ENSMUSG00000025885	0.00159006	ED	UD
ENSMUSG00000049489	0.00159006	ED	DE
ENSMUSG00000022750	0.00165559	ED	EE
ENSMUSG00000015488	0.00165665	ED	EU
ENSMUSG00000006586	0.00166825	ED	DD
ENSMUSG00000020083	0.00172548	ED	UD
ENSMUSG00000038500	0.00172961	ED	EE
ENSMUSG00000000214	0.00173519	ED	UD
ENSMUSG00000035298	0.00175833	ED	DE
ENSMUSG00000029095	0.00183377	ED	ED
ENSMUSG00000033209	0.00183845	ED	UD
ENSMUSG00000043909	0.00187343	ED	UD
ENSMUSG00000031511	0.00190639	ED	EE
ENSMUSG00000065037	0.00190639	ED	UD
ENSMUSG00000102725	0.00190639	ED	EE
ENSMUSG00000034574	0.00197376	ED	EE
ENSMUSG00000029778	0.00198968	ED	UD
ENSMUSG00000059182	0.00203189	ED	ED
ENSMUSG00000055044	0.00207235	ED	ED
ENSMUSG00000003166	0.00208498	ED	UD
ENSMUSG00000023572	0.00213214	ED	UD
ENSMUSG00000038080	0.00217042	ED	ED
ENSMUSG00000021814	0.0023316	ED	UD
ENSMUSG00000096111	0.00234925	ED	EE
ENSMUSG00000086842	0.00235462	ED	ED
ENSMUSG00000024151	0.00240906	ED	ED
ENSMUSG00000029405	0.00243282	ED	ED
ENSMUSG00000086992	0.00244056	ED	UE
ENSMUSG00000028032	0.00246903	ED	ED
ENSMUSG00000041836	0.00246903	ED	ED
ENSMUSG00000020475	0.00253605	ED	EU
ENSMUSG00000029427	0.00256007	ED	ED
ENSMUSG00000023505	0.00257664	ED	ED
ENSMUSG00000032366	0.00259155	ED	ED
ENSMUSG00000015672	0.0026352	ED	ED
ENSMUSG00000035051	0.0026352	ED	EU
ENSMUSG00000026288	0.00269288	ED	EU
ENSMUSG00000024457	0.00278393	ED	UE
ENSMUSG00000098220	0.00281695	ED	EU
ENSMUSG00000022884	0.00284477	ED	ED
ENSMUSG00000032485	0.00286432	ED	ED
ENSMUSG00000040029	0.00286744	ED	DD
ENSMUSG00000055748	0.00286744	ED	EU
ENSMUSG00000032449	0.00286782	ED	ED
ENSMUSG00000003575	0.00287459	ED	ED
ENSMUSG00000073802	0.00290463	ED	EE
ENSMUSG00000020284	0.00294681	ED	ED
ENSMUSG00000006649	0.00298209	ED	EU
ENSMUSG00000044250	0.00311126	ED	EE
ENSMUSG00000085614	0.00314067	ED	EE
ENSMUSG00000032194	0.00320838	ED	ED
ENSMUSG00000054717	0.00321211	ED	DD
ENSMUSG00000033720	0.0032189	ED	UD
ENSMUSG00000006574	0.00331443	ED	EU
ENSMUSG00000045464	0.00333627	ED	EE
ENSMUSG00000097730	0.00336331	ED	EU
ENSMUSG00000085051	0.00338932	ED	EE
ENSMUSG00000039563	0.00341026	ED	UD
ENSMUSG00000059552	0.00342734	ED	ED
ENSMUSG00000007411	0.00343888	ED	ED
ENSMUSG00000042506	0.00349113	ED	ED
ENSMUSG00000058656	0.00349906	ED	EE
ENSMUSG00000030654	0.00354989	ED	ED
ENSMUSG00000053441	0.00357972	ED	EE
ENSMUSG00000084329	0.00360308	ED	EE
ENSMUSG00000016346	0.00360681	ED	EE
ENSMUSG00000024835	0.0037383	ED	UD
ENSMUSG00000026883	0.0037383	ED	ED
ENSMUSG00000036180	0.0037383	ED	UE
ENSMUSG00000024793	0.00376303	ED	EU
ENSMUSG00000038733	0.00385666	ED	DD
ENSMUSG00000028136	0.00388924	ED	EE
ENSMUSG00000032519	0.00389261	ED	DD
ENSMUSG00000002076	0.00389358	ED	UD
ENSMUSG00000027397	0.00398165	ED	UD
ENSMUSG00000026683	0.0039832	ED	ED
ENSMUSG00000019984	0.00399019	ED	EE
ENSMUSG00000024190	0.00403087	ED	UD
ENSMUSG00000068348	0.00408771	ED	EU
ENSMUSG00000054988	0.00409288	ED	EE
ENSMUSG00000030451	0.00418009	ED	ED
ENSMUSG00000041431	0.00421845	ED	EE
ENSMUSG00000030101	0.00426085	ED	UE
ENSMUSG00000052533	0.00427354	ED	UD
ENSMUSG00000051498	0.00432171	ED	EU
ENSMUSG00000060081	0.00434378	ED	ED
ENSMUSG00000019831	0.00444819	ED	ED
ENSMUSG00000058809	0.00448617	ED	EE
ENSMUSG00000032058	0.00457749	ED	EE
ENSMUSG00000047921	0.00470169	ED	UE
ENSMUSG00000021555	0.00472951	ED	ED
ENSMUSG00000025812	0.00472951	ED	UD
ENSMUSG00000009090	0.00475664	ED	ED
ENSMUSG00000027912	0.00475664	ED	EU
ENSMUSG00000037475	0.00478671	ED	ED
ENSMUSG00000029106	0.00480752	ED	ED
ENSMUSG00000032018	0.00487569	ED	DD
ENSMUSG00000062604	0.00493696	ED	EE
ENSMUSG00000048040	0.00495652	ED	ED
ENSMUSG00000020231	0.005044	ED	UD
ENSMUSG00000026634	0.00504722	ED	UD
ENSMUSG00000068699	0.0051968	ED	UD
ENSMUSG00000025257	0.00531807	ED	UE
ENSMUSG00000031731	0.00535015	ED	ED
ENSMUSG00000022898	0.00536226	ED	ED
ENSMUSG00000025217	0.00536226	ED	EU
ENSMUSG00000056216	0.00539118	ED	ED
ENSMUSG00000079084	0.00540171	ED	ED
ENSMUSG00000001911	0.00544625	ED	ED
ENSMUSG00000020260	0.00544625	ED	ED
ENSMUSG00000086841	0.00548444	ED	ED
ENSMUSG00000031652	0.00551355	ED	ED
ENSMUSG00000102241	0.00558432	ED	EE
ENSMUSG00000047583	0.0055936	ED	ED
ENSMUSG00000028737	0.005594	ED	ED
ENSMUSG00000083258	0.005594	ED	EU
ENSMUSG00000044340	0.00560252	ED	ED
ENSMUSG00000031284	0.00561514	ED	EU
ENSMUSG00000029684	0.00561934	ED	DE
ENSMUSG00000072694	0.00562448	ED	UD
ENSMUSG00000041781	0.00568444	ED	ED
ENSMUSG00000037720	0.00575699	ED	ED
ENSMUSG00000050592	0.00582446	ED	EE
ENSMUSG00000025982	0.00582833	ED	ED
ENSMUSG00000028809	0.00582833	ED	EE
ENSMUSG00000031660	0.00582833	ED	UD
ENSMUSG00000034575	0.00582833	ED	UD
ENSMUSG00000020472	0.0058364	ED	UD
ENSMUSG00000024998	0.0058364	ED	UE
ENSMUSG00000031781	0.00585525	ED	ED
ENSMUSG00000022206	0.00596358	ED	EE
ENSMUSG00000020873	0.00597284	ED	ED
ENSMUSG00000023266	0.00610624	ED	EE
ENSMUSG00000045624	0.00614927	ED	UD
ENSMUSG00000099470	0.00617223	ED	EE
ENSMUSG00000021009	0.00624331	ED	UD
ENSMUSG00000036813	0.0062543	ED	EE
ENSMUSG00000033222	0.00625467	ED	EE
ENSMUSG00000039835	0.00636101	ED	ED
ENSMUSG00000040205	0.00638766	ED	EU
ENSMUSG00000073901	0.00661583	ED	DU
ENSMUSG00000024811	0.0067537	ED	ED
ENSMUSG00000030747	0.00680924	ED	ED
ENSMUSG00000021481	0.00694945	ED	ED
ENSMUSG00000031609	0.00696193	ED	DD
ENSMUSG00000029012	0.00704202	ED	ED
ENSMUSG00000031574	0.00705089	ED	EE
ENSMUSG00000027634	0.00713214	ED	ED
ENSMUSG00000001999	0.00713709	ED	ED
ENSMUSG00000047182	0.00714607	ED	EU
ENSMUSG00000026620	0.00727401	ED	ED
ENSMUSG00000032295	0.00727401	ED	UE
ENSMUSG00000032316	0.00727401	ED	ED
ENSMUSG00000001847	0.00732663	ED	ED
ENSMUSG00000028796	0.00734003	ED	ED
ENSMUSG00000034189	0.00739234	ED	ED
ENSMUSG00000057440	0.00740076	ED	ED
ENSMUSG00000028017	0.00742259	ED	UD
ENSMUSG00000073995	0.00745444	ED	EU
ENSMUSG00000101896	0.00756627	ED	EU
ENSMUSG00000057265	0.00771169	ED	EE
ENSMUSG00000059511	0.00776978	ED	ED
ENSMUSG00000015880	0.00787895	ED	ED
ENSMUSG00000023330	0.00790859	ED	UD
ENSMUSG00000104428	0.00790859	ED	DE
ENSMUSG00000086606	0.00792406	ED	EE
ENSMUSG00000031928	0.00796859	ED	EE
ENSMUSG00000037104	0.00803532	ED	EU
ENSMUSG00000043740	0.00803532	ED	EU
ENSMUSG00000057193	0.00816371	ED	ED
ENSMUSG00000036306	0.00817026	ED	UE
ENSMUSG00000032030	0.0081971	ED	UD
ENSMUSG00000032897	0.00819939	ED	UD
ENSMUSG00000020672	0.00831869	ED	ED
ENSMUSG00000024922	0.00832041	ED	UD
ENSMUSG00000042570	0.00833266	ED	ED
ENSMUSG00000023007	0.00857005	ED	EE
ENSMUSG00000023861	0.00857005	ED	UD
ENSMUSG00000028901	0.00857005	ED	DU
ENSMUSG00000026885	0.00861229	ED	UD
ENSMUSG00000017774	0.00867262	ED	ED
ENSMUSG00000046223	0.00867682	ED	EE
ENSMUSG00000031441	0.00876273	ED	UD
ENSMUSG00000040652	0.00882903	ED	EE
ENSMUSG00000069769	0.00899704	ED	EU
ENSMUSG00000038208	0.00901312	ED	ED
ENSMUSG00000038068	0.00913575	ED	ED
ENSMUSG00000056014	0.00913575	ED	EE
ENSMUSG00000041028	0.00918449	ED	ED
ENSMUSG00000026774	0.00920224	ED	EU
ENSMUSG00000041895	0.00920243	ED	ED
ENSMUSG00000039952	0.00923939	ED	ED
ENSMUSG00000004341	0.00929987	ED	EE
ENSMUSG00000042535	0.00930445	ED	EE
ENSMUSG00000030718	0.00938712	ED	EE
ENSMUSG00000005907	0.00951539	ED	ED
ENSMUSG00000034525	0.00954335	ED	ED
ENSMUSG00000037032	0.0095763	ED	UD
ENSMUSG00000032041	0.00961695	ED	UD
ENSMUSG00000022285	0.0096838	ED	UD
ENSMUSG00000039238	0.00971716	ED	EE
ENSMUSG00000049119	0.009858	ED	EU
ENSMUSG00000051965	0.009858	ED	UE
ENSMUSG00000026390	0.00992644	ED	DD
ENSMUSG00000022992	0.0099547	ED	ED
ENSMUSG00000055436	0.0099547	ED	UD
ENSMUSG00000026248	0.0100707	ED	UD
ENSMUSG00000029701	0.0101188	ED	UD
ENSMUSG00000035086	0.0101188	ED	ED
ENSMUSG00000067377	0.0102502	ED	ED
ENSMUSG00000059208	0.0103962	ED	ED
ENSMUSG00000036667	0.0104007	ED	EE
ENSMUSG00000040007	0.0105099	ED	ED
ENSMUSG00000047649	0.0105139	ED	ED
ENSMUSG00000047777	0.0105195	ED	UD
ENSMUSG00000032564	0.0107436	ED	EE
ENSMUSG00000040389	0.0107569	ED	ED
ENSMUSG00000021076	0.0108881	ED	ED
ENSMUSG00000035227	0.0110309	ED	ED
ENSMUSG00000029267	0.0110519	ED	UD
ENSMUSG00000024791	0.0111947	ED	UD
ENSMUSG00000030491	0.0112006	ED	EE
ENSMUSG00000021044	0.0112194	ED	EU
ENSMUSG00000059796	0.0112305	ED	UD
ENSMUSG00000025239	0.0112555	ED	ED
ENSMUSG00000058056	0.0113428	ED	ED
ENSMUSG00000097978	0.011383	ED	ED
ENSMUSG00000028402	0.0113897	ED	ED
ENSMUSG00000024527	0.0115327	ED	ED
ENSMUSG00000024507	0.0115368	ED	ED
ENSMUSG00000023259	0.0115685	ED	UE
ENSMUSG00000094992	0.0115799	ED	UD
ENSMUSG00000024991	0.0116151	ED	ED
ENSMUSG00000103009	0.0116151	ED	EE
ENSMUSG00000090235	0.0119827	ED	UE
ENSMUSG00000029725	0.0119982	ED	ED
ENSMUSG00000027374	0.0120943	ED	EE
ENSMUSG00000022241	0.0121732	ED	ED
ENSMUSG00000018363	0.0123318	ED	ED
ENSMUSG00000046993	0.0124798	ED	ED
ENSMUSG00000020232	0.012585	ED	EE
ENSMUSG00000047227	0.0125987	ED	ED
ENSMUSG00000041638	0.0127215	ED	EE
ENSMUSG00000013611	0.0127406	ED	EU
ENSMUSG00000025130	0.0127406	ED	ED
ENSMUSG00000038244	0.0127406	ED	EE
ENSMUSG00000056214	0.0127613	ED	DE
ENSMUSG00000002870	0.012851	ED	UD
ENSMUSG00000038122	0.0128537	ED	DD
ENSMUSG00000070796	0.0129253	ED	EU
ENSMUSG00000029575	0.0129351	ED	EE
ENSMUSG00000085264	0.0129351	ED	EE
ENSMUSG00000030474	0.0132291	ED	EE
ENSMUSG00000025933	0.0135374	ED	ED
ENSMUSG00000021947	0.0135981	ED	ED
ENSMUSG00000046201	0.0136005	ED	UD
ENSMUSG00000090266	0.0136889	ED	DU
ENSMUSG00000083472	0.0137015	ED	UD
ENSMUSG00000003135	0.0137957	ED	ED
ENSMUSG00000021707	0.0140632	ED	ED
ENSMUSG00000020492	0.014087	ED	DD
ENSMUSG00000030528	0.014111	ED	ED
ENSMUSG00000096712	0.0141129	ED	ED
ENSMUSG00000020181	0.0141131	ED	ED
ENSMUSG00000028427	0.0141131	ED	EU
ENSMUSG00000030970	0.0141874	ED	UD
ENSMUSG00000062157	0.0142314	ED	EE
ENSMUSG00000040345	0.0143185	ED	ED
ENSMUSG00000011148	0.0145287	ED	EE
ENSMUSG00000018923	0.0145287	ED	ED
ENSMUSG00000029312	0.0145858	ED	ED
ENSMUSG00000078762	0.0146356	ED	ED
ENSMUSG00000033544	0.0146397	ED	EE
ENSMUSG00000044465	0.0146414	ED	UE
ENSMUSG00000059183	0.0149094	ED	ED
ENSMUSG00000032477	0.0149468	ED	ED
ENSMUSG00000031950	0.0151031	ED	UD
ENSMUSG00000028251	0.015111	ED	EU
ENSMUSG00000035441	0.0151705	ED	ED
ENSMUSG00000041144	0.0151761	ED	ED
ENSMUSG00000029036	0.015205	ED	UD
ENSMUSG00000098197	0.015205	ED	UD
ENSMUSG00000083429	0.0152876	ED	EE
ENSMUSG00000059173	0.015307	ED	EE
ENSMUSG00000033910	0.0153275	ED	EE
ENSMUSG00000028145	0.0153421	ED	UD
ENSMUSG00000022844	0.0153828	ED	ED
ENSMUSG00000013033	0.0155796	ED	ED
ENSMUSG00000103104	0.0159951	ED	ED
ENSMUSG00000028343	0.0160502	ED	DD
ENSMUSG00000055452	0.016224	ED	UD
ENSMUSG00000029505	0.0162475	ED	UD
ENSMUSG00000097806	0.0162516	ED	EE
ENSMUSG00000046610	0.0162784	ED	DE
ENSMUSG00000050910	0.0162784	ED	EE
ENSMUSG00000034551	0.0162853	ED	EE
ENSMUSG00000038292	0.0164149	ED	UD
ENSMUSG00000061578	0.0164149	ED	EU
ENSMUSG00000022498	0.0164261	ED	UD
ENSMUSG00000034087	0.0165347	ED	DD
ENSMUSG00000038194	0.0165878	ED	UE
ENSMUSG00000031545	0.0166827	ED	ED
ENSMUSG00000090470	0.0167759	ED	ED
ENSMUSG00000021116	0.0167968	ED	UD
ENSMUSG00000024429	0.0167968	ED	UD
ENSMUSG00000078941	0.017028	ED	UD
ENSMUSG00000029368	0.0171614	ED	EU
ENSMUSG00000031353	0.0171614	ED	ED
ENSMUSG00000026602	0.0172598	ED	EE
ENSMUSG00000063760	0.0173143	ED	DE
ENSMUSG00000055235	0.017353	ED	EE
ENSMUSG00000016559	0.0175434	ED	UD
ENSMUSG00000082675	0.0175478	ED	ED
ENSMUSG00000002897	0.0175641	ED	UD
ENSMUSG00000059434	0.0177343	ED	UD
ENSMUSG00000097933	0.0177459	ED	EU
ENSMUSG00000002778	0.01786	ED	EE
ENSMUSG00000027534	0.0180699	ED	ED
ENSMUSG00000039427	0.0180997	ED	DD
ENSMUSG00000074579	0.0181736	ED	DU
ENSMUSG00000059119	0.0182285	ED	UD
ENSMUSG00000086513	0.0182425	ED	EU
ENSMUSG00000100975	0.0182826	ED	UD
ENSMUSG00000026111	0.0182933	ED	DD
ENSMUSG00000058741	0.0182933	ED	EU
ENSMUSG00000005882	0.0184462	ED	ED
ENSMUSG00000025077	0.0185349	ED	DD
ENSMUSG00000036678	0.0186142	ED	ED
ENSMUSG00000002307	0.0189494	ED	ED
ENSMUSG00000098090	0.0191444	ED	ED
ENSMUSG00000030058	0.0193699	ED	UD
ENSMUSG00000066113	0.0194888	ED	UD
ENSMUSG00000008140	0.0195312	ED	DE
ENSMUSG00000029472	0.0196944	ED	EU
ENSMUSG00000026088	0.0197147	ED	ED
ENSMUSG00000028249	0.0198651	ED	ED
ENSMUSG00000038708	0.0198691	ED	ED
ENSMUSG00000016946	0.0198734	ED	ED
ENSMUSG00000026662	0.0198766	ED	ED
ENSMUSG00000021361	0.020012	ED	UD
ENSMUSG00000040675	0.020012	ED	ED
ENSMUSG00000027498	0.0201361	ED	DD
ENSMUSG00000030042	0.0201361	ED	ED
ENSMUSG00000063856	0.0202169	ED	ED
ENSMUSG00000070345	0.0202924	ED	EE
ENSMUSG00000003198	0.020326	ED	ED
ENSMUSG00000094530	0.0203583	ED	ED
ENSMUSG00000021957	0.0203824	ED	EE
ENSMUSG00000005078	0.0205173	ED	ED
ENSMUSG00000025140	0.0205611	ED	EU
ENSMUSG00000026526	0.0205611	ED	DE
ENSMUSG00000006611	0.0206315	ED	EE
ENSMUSG00000026580	0.0206555	ED	ED
ENSMUSG00000002546	0.0207426	ED	UD
ENSMUSG00000032679	0.0207923	ED	ED
ENSMUSG00000033323	0.0209136	ED	UE
ENSMUSG00000071645	0.0210016	ED	ED
ENSMUSG00000022340	0.0210387	ED	ED
ENSMUSG00000025777	0.0210622	ED	EE
ENSMUSG00000002910	0.021112	ED	ED
ENSMUSG00000034762	0.021253	ED	EU
ENSMUSG00000020778	0.0214914	ED	ED
ENSMUSG00000032783	0.0215074	ED	ED
ENSMUSG00000043881	0.0215764	ED	ED
ENSMUSG00000018199	0.0215994	ED	DE
ENSMUSG00000104044	0.0216334	ED	EE
ENSMUSG00000030269	0.0217477	ED	EE
ENSMUSG00000057406	0.0218177	ED	EE
ENSMUSG00000035351	0.0219446	ED	ED
ENSMUSG00000036980	0.0219651	ED	ED
ENSMUSG00000057182	0.0227532	ED	EE
ENSMUSG00000087436	0.0228591	ED	EE
ENSMUSG00000039321	0.0229704	ED	UD
ENSMUSG00000020865	0.0232364	ED	UD
ENSMUSG00000087149	0.0232536	ED	EE
ENSMUSG00000061701	0.0232959	ED	UD
ENSMUSG00000032908	0.0233244	ED	EE
ENSMUSG00000081499	0.0233449	ED	EE
ENSMUSG00000023971	0.023359	ED	UD
ENSMUSG00000020594	0.0233651	ED	EU
ENSMUSG00000028078	0.0234583	ED	ED
ENSMUSG00000040720	0.0234784	ED	UD
ENSMUSG00000031841	0.0235195	ED	ED
ENSMUSG00000047084	0.0235343	ED	ED
ENSMUSG00000027233	0.0235758	ED	ED
ENSMUSG00000027962	0.0235758	ED	DD
ENSMUSG00000086238	0.0235758	ED	EU
ENSMUSG00000026405	0.0235873	ED	EE
ENSMUSG00000090946	0.0235915	ED	EE
ENSMUSG00000029253	0.0236586	ED	ED
ENSMUSG00000031853	0.0236986	ED	ED
ENSMUSG00000035505	0.0238692	ED	EE
ENSMUSG00000025609	0.0240975	ED	EE
ENSMUSG00000056537	0.0240975	ED	DE
ENSMUSG00000002107	0.0244118	ED	ED
ENSMUSG00000028777	0.0244118	ED	DE
ENSMUSG00000070738	0.0244118	ED	ED
ENSMUSG00000009563	0.0245108	ED	ED
ENSMUSG00000021962	0.0245361	ED	ED
ENSMUSG00000029832	0.0245361	ED	EU
ENSMUSG00000079429	0.0245539	ED	ED
ENSMUSG00000045291	0.0247561	ED	UD
ENSMUSG00000035891	0.0249009	ED	EE
ENSMUSG00000031750	0.0249597	ED	DE
ENSMUSG00000054752	0.0249597	ED	ED
ENSMUSG00000071659	0.0249597	ED	EE
ENSMUSG00000003346	0.0249636	ED	ED
ENSMUSG00000021983	0.0250155	ED	DE
ENSMUSG00000062732	0.025074	ED	EU
ENSMUSG00000064080	0.025074	ED	EE
ENSMUSG00000021870	0.0251299	ED	DD
ENSMUSG00000030007	0.0251299	ED	ED
ENSMUSG00000014503	0.0251653	ED	UD
ENSMUSG00000024491	0.0251653	ED	EE
ENSMUSG00000045664	0.0251653	ED	UD
ENSMUSG00000035048	0.0251969	ED	DE
ENSMUSG00000038366	0.0252643	ED	EE
ENSMUSG00000029629	0.0254525	ED	ED
ENSMUSG00000026594	0.0254639	ED	ED
ENSMUSG00000057234	0.0255015	ED	ED
ENSMUSG00000055065	0.0255167	ED	ED
ENSMUSG00000042423	0.0257744	ED	UE
ENSMUSG00000067365	0.0259833	ED	DD
ENSMUSG00000094954	0.0259974	ED	ED
ENSMUSG00000068917	0.0260795	ED	ED
ENSMUSG00000060187	0.0261055	ED	EE
ENSMUSG00000021294	0.0263362	ED	UD
ENSMUSG00000029673	0.0263415	ED	DE
ENSMUSG00000036940	0.0265217	ED	DE
ENSMUSG00000040687	0.0266929	ED	EE
ENSMUSG00000025956	0.0267779	ED	ED
ENSMUSG00000009079	0.026797	ED	ED
ENSMUSG00000030494	0.026797	ED	ED
ENSMUSG00000055717	0.026797	ED	EE
ENSMUSG00000016481	0.0269157	ED	EE
ENSMUSG00000038582	0.0269874	ED	UD
ENSMUSG00000062995	0.0269874	ED	EE
ENSMUSG00000034312	0.0270056	ED	UE
ENSMUSG00000031917	0.027348	ED	ED
ENSMUSG00000005057	0.0276775	ED	EU
ENSMUSG00000024425	0.0280179	ED	ED
ENSMUSG00000069376	0.028074	ED	EE
ENSMUSG00000020758	0.0281547	ED	ED
ENSMUSG00000021277	0.0281547	ED	UD
ENSMUSG00000047509	0.0282253	ED	DE
ENSMUSG00000004947	0.0283769	ED	UD
ENSMUSG00000038351	0.0284322	ED	EE
ENSMUSG00000019907	0.028696	ED	ED
ENSMUSG00000040591	0.0287635	ED	EE
ENSMUSG00000030965	0.0289091	ED	EE
ENSMUSG00000007570	0.0289533	ED	EE
ENSMUSG00000032235	0.0289533	ED	DD
ENSMUSG00000019856	0.029034	ED	EE
ENSMUSG00000041740	0.0290859	ED	UD
ENSMUSG00000049728	0.0291149	ED	EE
ENSMUSG00000051256	0.0292804	ED	UD
ENSMUSG00000042625	0.029303	ED	UD
ENSMUSG00000032010	0.0293514	ED	ED
ENSMUSG00000030609	0.0293847	ED	UE
ENSMUSG00000049232	0.029519	ED	DE
ENSMUSG00000033902	0.0296106	ED	UD
ENSMUSG00000030271	0.0296153	ED	EE
ENSMUSG00000034329	0.0307366	ED	ED
ENSMUSG00000074922	0.0308997	ED	ED
ENSMUSG00000074480	0.0309707	ED	EE
ENSMUSG00000024908	0.0310734	ED	UD
ENSMUSG00000040276	0.0313209	ED	UD
ENSMUSG00000025316	0.0313769	ED	UD
ENSMUSG00000057886	0.0313769	ED	EE
ENSMUSG00000047409	0.0315578	ED	EE
ENSMUSG00000090081	0.0323307	ED	EE
ENSMUSG00000006678	0.0324038	ED	EE
ENSMUSG00000021286	0.0325148	ED	ED
ENSMUSG00000008958	0.0328298	ED	ED
ENSMUSG00000047501	0.0328298	ED	ED
ENSMUSG00000020037	0.0329413	ED	EE
ENSMUSG00000060376	0.0330726	ED	EE
ENSMUSG00000061755	0.0336213	ED	ED
ENSMUSG00000062646	0.0336288	ED	ED
ENSMUSG00000006732	0.0336392	ED	UD
ENSMUSG00000062110	0.0338053	ED	ED
ENSMUSG00000067071	0.0338845	ED	EU
ENSMUSG00000081752	0.0342602	ED	ED
ENSMUSG00000027652	0.0344008	ED	UD
ENSMUSG00000027281	0.0345666	ED	DD
ENSMUSG00000000823	0.0346007	ED	ED
ENSMUSG00000044339	0.0346926	ED	EE
ENSMUSG00000063802	0.0348045	ED	DD
ENSMUSG00000020431	0.034905	ED	DE
ENSMUSG00000007457	0.034925	ED	EE
ENSMUSG00000049608	0.0350637	ED	EE
ENSMUSG00000004655	0.0351343	ED	UE
ENSMUSG00000033713	0.0353182	ED	ED
ENSMUSG00000036893	0.0353733	ED	ED
ENSMUSG00000025856	0.035399	ED	ED
ENSMUSG00000037492	0.035399	ED	ED
ENSMUSG00000081255	0.035399	ED	EE
ENSMUSG00000070323	0.0354412	ED	EE
ENSMUSG00000090036	0.0354412	ED	ED
ENSMUSG00000037347	0.0354949	ED	UD
ENSMUSG00000042594	0.035575	ED	EE
ENSMUSG00000043015	0.0356599	ED	ED
ENSMUSG00000022122	0.0356647	ED	EE
ENSMUSG00000041779	0.0359249	ED	ED
ENSMUSG00000041308	0.035954	ED	ED
ENSMUSG00000039621	0.0360088	ED	ED
ENSMUSG00000035478	0.036035	ED	UE
ENSMUSG00000072915	0.0360567	ED	UD
ENSMUSG00000023272	0.0362468	ED	ED
ENSMUSG00000028497	0.0362468	ED	ED
ENSMUSG00000085956	0.0362468	ED	DE
ENSMUSG00000033316	0.0363379	ED	ED
ENSMUSG00000083318	0.0365716	ED	UD
ENSMUSG00000020381	0.0365869	ED	UD
ENSMUSG00000025268	0.0367078	ED	EE
ENSMUSG00000031129	0.0368363	ED	ED
ENSMUSG00000014554	0.0369017	ED	ED
ENSMUSG00000013878	0.0369111	ED	ED
ENSMUSG00000042308	0.0375562	ED	ED
ENSMUSG00000020652	0.037572	ED	UD
ENSMUSG00000051396	0.0376781	ED	ED
ENSMUSG00000100071	0.0378071	ED	EE
ENSMUSG00000034330	0.0380119	ED	UE
ENSMUSG00000021910	0.0380418	ED	ED
ENSMUSG00000038695	0.0382788	ED	UD
ENSMUSG00000019734	0.0387789	ED	EE
ENSMUSG00000025473	0.0388451	ED	ED
ENSMUSG00000043964	0.0389081	ED	ED
ENSMUSG00000033096	0.0389287	ED	ED
ENSMUSG00000021577	0.0390542	ED	UD
ENSMUSG00000040249	0.0390542	ED	ED
ENSMUSG00000028873	0.0391646	ED	UD
ENSMUSG00000085921	0.0391646	ED	UE
ENSMUSG00000037280	0.0392483	ED	UD
ENSMUSG00000058076	0.0393902	ED	ED
ENSMUSG00000035960	0.0395059	ED	UE
ENSMUSG00000003644	0.0396439	ED	EU
ENSMUSG00000020752	0.0396439	ED	UD
ENSMUSG00000059361	0.0399865	ED	DE
ENSMUSG00000058267	0.0400714	ED	UD
ENSMUSG00000048012	0.0402963	ED	DE
ENSMUSG00000078183	0.0404213	ED	UD
ENSMUSG00000006412	0.0405243	ED	ED
ENSMUSG00000089824	0.0405243	ED	ED
ENSMUSG00000082870	0.0409599	ED	EE
ENSMUSG00000027309	0.0409623	ED	ED
ENSMUSG00000028911	0.0409623	ED	ED
ENSMUSG00000030498	0.0411188	ED	EE
ENSMUSG00000024948	0.0414741	ED	UD
ENSMUSG00000033430	0.0416837	ED	DE
ENSMUSG00000010796	0.0417234	ED	EE
ENSMUSG00000041096	0.0419269	ED	EE
ENSMUSG00000058388	0.0419329	ED	DE
ENSMUSG00000059456	0.0419329	ED	EE
ENSMUSG00000051650	0.0419703	ED	EE
ENSMUSG00000009621	0.0423481	ED	DE
ENSMUSG00000075023	0.042577	ED	ED
ENSMUSG00000059974	0.0426083	ED	UE
ENSMUSG00000006301	0.0427244	ED	UD
ENSMUSG00000036158	0.0427583	ED	ED
ENSMUSG00000038527	0.0427583	ED	ED
ENSMUSG00000031629	0.042812	ED	ED
ENSMUSG00000028016	0.0428429	ED	DE
ENSMUSG00000026023	0.0429398	ED	ED
ENSMUSG00000036751	0.0434111	ED	ED
ENSMUSG00000039616	0.0435925	ED	UE
ENSMUSG00000039103	0.0436132	ED	ED
ENSMUSG00000040260	0.0437529	ED	EE
ENSMUSG00000068876	0.0437965	ED	ED
ENSMUSG00000024927	0.043851	ED	UD
ENSMUSG00000053931	0.0441431	ED	DE
ENSMUSG00000040250	0.0441901	ED	ED
ENSMUSG00000034449	0.0443909	ED	EE
ENSMUSG00000021974	0.0446999	ED	UD
ENSMUSG00000047710	0.0447871	ED	UD
ENSMUSG00000071708	0.0449432	ED	EE
ENSMUSG00000026836	0.0450883	ED	DD
ENSMUSG00000032392	0.0451364	ED	ED
ENSMUSG00000040158	0.0452029	ED	UD
ENSMUSG00000021025	0.0453661	ED	ED
ENSMUSG00000045038	0.0457161	ED	DD
ENSMUSG00000001158	0.0457592	ED	ED
ENSMUSG00000022544	0.0458301	ED	ED
ENSMUSG00000031209	0.0469135	ED	EE
ENSMUSG00000041773	0.0469135	ED	EE
ENSMUSG00000054986	0.0471332	ED	EE
ENSMUSG00000029191	0.047471	ED	UD
ENSMUSG00000067220	0.0475	ED	ED
ENSMUSG00000005299	0.04755	ED	ED
ENSMUSG00000027291	0.0476051	ED	ED
ENSMUSG00000057421	0.0476051	ED	UD
ENSMUSG00000028607	0.0478512	ED	ED
ENSMUSG00000035642	0.0479971	ED	EE
ENSMUSG00000095868	0.0481497	ED	EE
ENSMUSG00000015093	0.0481555	ED	EE
ENSMUSG00000038072	0.0484931	ED	ED
ENSMUSG00000003534	0.0485743	ED	UD
ENSMUSG00000005686	0.0490291	ED	ED
ENSMUSG00000022673	0.0490344	ED	ED
ENSMUSG00000026097	0.0490344	ED	ED
ENSMUSG00000002699	0.0491562	ED	UE
ENSMUSG00000071652	0.0492597	ED	EE
ENSMUSG00000026283	0.0494359	ED	ED
ENSMUSG00000043733	0.0494359	ED	UE
ENSMUSG00000007880	0.0497773	ED	UD
ENSMUSG00000078789	0.0499489	ED	EU
