# Supplementary material for: Stella modulates transcriptional and endogenous retrovirus programs during maternal-to-zygotic transition
Source: eLife journal article supplement (doi:10.7554/elife.22345), 2017-03-21
Supplement: supp [file elife-22345-supp-v1.zip › elife_poa_e22345_Figure_1_source_data_4.xlsx]

## Sheet: Sheet1
Figure 1 - source data 4. List of zygotically activated genes (ZAG) , WT class = EU, which are differentially expressed in KO samples. "E" denotes equally expressed, "D" denotes downregulated or "U" denotes upregulated at a later time point. Adjusted p-value (padj) shows significant differential expression between WT and KO class.
ENSEMBL ID	padj	WT class	KO class
ENSMUSG00000042684	9.22236e-19	EU	EU
ENSMUSG00000018379	5.16393e-15	EU	DU
ENSMUSG00000025024	7.36764e-15	EU	DE
ENSMUSG00000062794	1.25771e-13	EU	EU
ENSMUSG00000047554	1.25331e-12	EU	EU
ENSMUSG00000060739	7.00128e-12	EU	DE
ENSMUSG00000036764	1.75967e-11	EU	EU
ENSMUSG00000006056	4.20304e-11	EU	EU
ENSMUSG00000028483	1.1581e-10	EU	UD
ENSMUSG00000000561	1.74277e-10	EU	EU
ENSMUSG00000046410	3.79217e-10	EU	EU
ENSMUSG00000066141	3.79217e-10	EU	EU
ENSMUSG00000069476	9.2081e-10	EU	DD
ENSMUSG00000036438	1.06676e-09	EU	DU
ENSMUSG00000090693	1.3483e-09	EU	EU
ENSMUSG00000021536	5.40568e-09	EU	UE
ENSMUSG00000021413	5.5902e-09	EU	DD
ENSMUSG00000037857	8.33271e-09	EU	EE
ENSMUSG00000007892	1.22236e-08	EU	ED
ENSMUSG00000083337	2.60883e-08	EU	DE
ENSMUSG00000032788	3.78346e-08	EU	EU
ENSMUSG00000023257	5.02993e-08	EU	ED
ENSMUSG00000037851	5.67188e-08	EU	ED
ENSMUSG00000072944	1.08662e-07	EU	DE
ENSMUSG00000030200	1.11454e-07	EU	EU
ENSMUSG00000042305	1.11454e-07	EU	DU
ENSMUSG00000030603	1.26189e-07	EU	UD
ENSMUSG00000031617	1.27651e-07	EU	DD
ENSMUSG00000079162	2.02554e-07	EU	UU
ENSMUSG00000026840	2.35605e-07	EU	EE
ENSMUSG00000020454	2.42929e-07	EU	DU
ENSMUSG00000047139	2.64304e-07	EU	EU
ENSMUSG00000026238	2.6643e-07	EU	ED
ENSMUSG00000028676	3.20076e-07	EU	DE
ENSMUSG00000096983	3.36502e-07	EU	EE
ENSMUSG00000024827	3.38526e-07	EU	ED
ENSMUSG00000025203	4.05357e-07	EU	EE
ENSMUSG00000021302	7.59951e-07	EU	EU
ENSMUSG00000003226	8.02822e-07	EU	DE
ENSMUSG00000030759	8.14152e-07	EU	ED
ENSMUSG00000024640	1.4475e-06	EU	EU
ENSMUSG00000032231	1.4475e-06	EU	ED
ENSMUSG00000026319	1.85371e-06	EU	DE
ENSMUSG00000078713	1.90993e-06	EU	EU
ENSMUSG00000025838	3.43522e-06	EU	DU
ENSMUSG00000051223	4.14223e-06	EU	DU
ENSMUSG00000011263	4.85702e-06	EU	EU
ENSMUSG00000019948	5.40297e-06	EU	DD
ENSMUSG00000096647	5.50131e-06	EU	EU
ENSMUSG00000083621	5.70992e-06	EU	EE
ENSMUSG00000029817	7.64821e-06	EU	UD
ENSMUSG00000091655	8.44736e-06	EU	UD
ENSMUSG00000035958	8.57309e-06	EU	EE
ENSMUSG00000004268	8.63872e-06	EU	UE
ENSMUSG00000017400	8.67049e-06	EU	UU
ENSMUSG00000078509	9.32304e-06	EU	EU
ENSMUSG00000025358	1.01479e-05	EU	DU
ENSMUSG00000060743	1.04078e-05	EU	DU
ENSMUSG00000049957	1.20002e-05	EU	DU
ENSMUSG00000052912	1.21097e-05	EU	DU
ENSMUSG00000040649	1.37237e-05	EU	ED
ENSMUSG00000078508	1.56323e-05	EU	EE
ENSMUSG00000028434	1.76611e-05	EU	EU
ENSMUSG00000034297	1.79763e-05	EU	EU
ENSMUSG00000023940	1.8291e-05	EU	DU
ENSMUSG00000070493	2.06934e-05	EU	EU
ENSMUSG00000045799	2.38084e-05	EU	ED
ENSMUSG00000025869	2.47175e-05	EU	EU
ENSMUSG00000023025	2.51621e-05	EU	DU
ENSMUSG00000024180	2.56956e-05	EU	DU
ENSMUSG00000049164	2.70262e-05	EU	DU
ENSMUSG00000032423	2.737e-05	EU	EE
ENSMUSG00000009013	2.78609e-05	EU	EU
ENSMUSG00000020149	2.93265e-05	EU	EU
ENSMUSG00000047141	3.21944e-05	EU	DU
ENSMUSG00000100204	3.33158e-05	EU	ED
ENSMUSG00000019989	3.3421e-05	EU	DU
ENSMUSG00000061544	3.48207e-05	EU	EU
ENSMUSG00000019804	4.0071e-05	EU	DU
ENSMUSG00000033773	4.11707e-05	EU	EU
ENSMUSG00000031568	4.12765e-05	EU	EE
ENSMUSG00000094518	4.16355e-05	EU	DE
ENSMUSG00000040746	4.24079e-05	EU	EU
ENSMUSG00000083246	4.40033e-05	EU	DU
ENSMUSG00000026429	5.27889e-05	EU	DE
ENSMUSG00000026568	5.318e-05	EU	EE
ENSMUSG00000009555	5.66979e-05	EU	UE
ENSMUSG00000024298	5.75137e-05	EU	EU
ENSMUSG00000074461	5.91202e-05	EU	EE
ENSMUSG00000028121	5.94417e-05	EU	UU
ENSMUSG00000021273	6.36484e-05	EU	DU
ENSMUSG00000017760	6.75008e-05	EU	DU
ENSMUSG00000075408	7.15464e-05	EU	UE
ENSMUSG00000042184	8.44327e-05	EU	EU
ENSMUSG00000016018	8.58201e-05	EU	EE
ENSMUSG00000095597	8.59614e-05	EU	UE
ENSMUSG00000001403	9.4543e-05	EU	DU
ENSMUSG00000104218	0.000100794	EU	EE
ENSMUSG00000000730	0.000104287	EU	DU
ENSMUSG00000018846	0.00011022	EU	DU
ENSMUSG00000063480	0.000112268	EU	ED
ENSMUSG00000014905	0.000127491	EU	EU
ENSMUSG00000017843	0.000130535	EU	EU
ENSMUSG00000082100	0.000135613	EU	EU
ENSMUSG00000097599	0.000140499	EU	DU
ENSMUSG00000040413	0.000148055	EU	EU
ENSMUSG00000015961	0.00016294	EU	UU
ENSMUSG00000075701	0.000171242	EU	EU
ENSMUSG00000027763	0.000181156	EU	ED
ENSMUSG00000030353	0.000183296	EU	EU
ENSMUSG00000074797	0.000192983	EU	UE
ENSMUSG00000025192	0.000198346	EU	EE
ENSMUSG00000030469	0.000198346	EU	ED
ENSMUSG00000037822	0.000203783	EU	DU
ENSMUSG00000002996	0.000229615	EU	DD
ENSMUSG00000027654	0.000232674	EU	ED
ENSMUSG00000031701	0.00024185	EU	DU
ENSMUSG00000048486	0.000243754	EU	EU
ENSMUSG00000041872	0.000245756	EU	DU
ENSMUSG00000020290	0.000255177	EU	DU
ENSMUSG00000027981	0.000255242	EU	DU
ENSMUSG00000038848	0.000260992	EU	EU
ENSMUSG00000021806	0.000261215	EU	EE
ENSMUSG00000101878	0.000261215	EU	UD
ENSMUSG00000027582	0.000268562	EU	EU
ENSMUSG00000020397	0.000268671	EU	EU
ENSMUSG00000022978	0.000268671	EU	DU
ENSMUSG00000024581	0.000275793	EU	EE
ENSMUSG00000090877	0.000290082	EU	UE
ENSMUSG00000097195	0.000291968	EU	ED
ENSMUSG00000050022	0.000295081	EU	EU
ENSMUSG00000027195	0.000300845	EU	DE
ENSMUSG00000029463	0.000302382	EU	EE
ENSMUSG00000009630	0.00031629	EU	EU
ENSMUSG00000085776	0.000321168	EU	EU
ENSMUSG00000005483	0.000323595	EU	UU
ENSMUSG00000042757	0.000325742	EU	DU
ENSMUSG00000025747	0.000330292	EU	ED
ENSMUSG00000023982	0.000346185	EU	EU
ENSMUSG00000029314	0.000363548	EU	DU
ENSMUSG00000028559	0.0003672	EU	UU
ENSMUSG00000027581	0.000386835	EU	EU
ENSMUSG00000025937	0.000398048	EU	EE
ENSMUSG00000058706	0.000398048	EU	ED
ENSMUSG00000085114	0.000409022	EU	EU
ENSMUSG00000027651	0.000409433	EU	EE
ENSMUSG00000104316	0.000438009	EU	EU
ENSMUSG00000011267	0.000447831	EU	UE
ENSMUSG00000031352	0.000447831	EU	EE
ENSMUSG00000055866	0.000490536	EU	ED
ENSMUSG00000082925	0.000500773	EU	DU
ENSMUSG00000066362	0.00053739	EU	UE
ENSMUSG00000000581	0.000539911	EU	EU
ENSMUSG00000020189	0.00054953	EU	DU
ENSMUSG00000047804	0.000562218	EU	DU
ENSMUSG00000005204	0.000563384	EU	DU
ENSMUSG00000025880	0.000567405	EU	EU
ENSMUSG00000031508	0.000580016	EU	ED
ENSMUSG00000029204	0.000606877	EU	EU
ENSMUSG00000001827	0.000656131	EU	UU
ENSMUSG00000071415	0.000668002	EU	EE
ENSMUSG00000093545	0.000680925	EU	EE
ENSMUSG00000038886	0.00068812	EU	UU
ENSMUSG00000018442	0.000701543	EU	DE
ENSMUSG00000035578	0.000729351	EU	ED
ENSMUSG00000034858	0.000735906	EU	UU
ENSMUSG00000018661	0.000753924	EU	UD
ENSMUSG00000025351	0.000757875	EU	UU
ENSMUSG00000016520	0.000777486	EU	UU
ENSMUSG00000024462	0.000790732	EU	EE
ENSMUSG00000026278	0.000790732	EU	DE
ENSMUSG00000022322	0.000818731	EU	EE
ENSMUSG00000025911	0.000822459	EU	ED
ENSMUSG00000039224	0.000822459	EU	EU
ENSMUSG00000042289	0.000846084	EU	UU
ENSMUSG00000096844	0.000849503	EU	EU
ENSMUSG00000033054	0.000859131	EU	DU
ENSMUSG00000022453	0.000873399	EU	EE
ENSMUSG00000048573	0.000889013	EU	EE
ENSMUSG00000050900	0.00089481	EU	EU
ENSMUSG00000037325	0.000917956	EU	ED
ENSMUSG00000094311	0.000943032	EU	EU
ENSMUSG00000047342	0.000967072	EU	ED
ENSMUSG00000074030	0.00104826	EU	EU
ENSMUSG00000075269	0.00104852	EU	UU
ENSMUSG00000032387	0.00109445	EU	DU
ENSMUSG00000047719	0.00111811	EU	DU
ENSMUSG00000075266	0.00111811	EU	EE
ENSMUSG00000097150	0.00121917	EU	ED
ENSMUSG00000091478	0.0012244	EU	UD
ENSMUSG00000078952	0.00122731	EU	EE
ENSMUSG00000003752	0.00126359	EU	EU
ENSMUSG00000005054	0.00130875	EU	EU
ENSMUSG00000028187	0.0013362	EU	DU
ENSMUSG00000049764	0.0013362	EU	DU
ENSMUSG00000059970	0.00135161	EU	EE
ENSMUSG00000017677	0.0013597	EU	DU
ENSMUSG00000037058	0.0013597	EU	DU
ENSMUSG00000069682	0.00136286	EU	EU
ENSMUSG00000050627	0.00137912	EU	EE
ENSMUSG00000001525	0.00138466	EU	EE
ENSMUSG00000083465	0.00141564	EU	DU
ENSMUSG00000024045	0.00148704	EU	EU
ENSMUSG00000044609	0.00148704	EU	EE
ENSMUSG00000099936	0.00158747	EU	EU
ENSMUSG00000035266	0.00166326	EU	DU
ENSMUSG00000075273	0.00170824	EU	DU
ENSMUSG00000029464	0.00178379	EU	EE
ENSMUSG00000063200	0.00179256	EU	EE
ENSMUSG00000030055	0.00183845	EU	DU
ENSMUSG00000030697	0.00183845	EU	DU
ENSMUSG00000046671	0.0018447	EU	DU
ENSMUSG00000017707	0.00187124	EU	DU
ENSMUSG00000028222	0.00189027	EU	EU
ENSMUSG00000023961	0.00192101	EU	EE
ENSMUSG00000062997	0.00198968	EU	EE
ENSMUSG00000044597	0.00200284	EU	EU
ENSMUSG00000028678	0.00200959	EU	EE
ENSMUSG00000074158	0.00201809	EU	EE
ENSMUSG00000022711	0.00206376	EU	ED
ENSMUSG00000026014	0.00208468	EU	EU
ENSMUSG00000001767	0.00213373	EU	ED
ENSMUSG00000016619	0.00229467	EU	EU
ENSMUSG00000024402	0.00232653	EU	EU
ENSMUSG00000039521	0.0023678	EU	EE
ENSMUSG00000018848	0.00237076	EU	ED
ENSMUSG00000024824	0.00238466	EU	DU
ENSMUSG00000051022	0.00238633	EU	EE
ENSMUSG00000036291	0.00240906	EU	EE
ENSMUSG00000030682	0.00243282	EU	EU
ENSMUSG00000019942	0.00246733	EU	DU
ENSMUSG00000082423	0.00250994	EU	EE
ENSMUSG00000083403	0.00256113	EU	ED
ENSMUSG00000033420	0.00256308	EU	EU
ENSMUSG00000038628	0.00256308	EU	EU
ENSMUSG00000022142	0.00271113	EU	EU
ENSMUSG00000040128	0.00276311	EU	UU
ENSMUSG00000070729	0.00276664	EU	ED
ENSMUSG00000020300	0.00289856	EU	DU
ENSMUSG00000027942	0.00294197	EU	DU
ENSMUSG00000036810	0.00294197	EU	DU
ENSMUSG00000045519	0.00294233	EU	EE
ENSMUSG00000081344	0.00294681	EU	EE
ENSMUSG00000094436	0.00296728	EU	EU
ENSMUSG00000054051	0.00320838	EU	DU
ENSMUSG00000073067	0.00321211	EU	ED
ENSMUSG00000031986	0.00326243	EU	DU
ENSMUSG00000010358	0.0032936	EU	EU
ENSMUSG00000026317	0.00334466	EU	UE
ENSMUSG00000028413	0.00336006	EU	EE
ENSMUSG00000030701	0.00336331	EU	UU
ENSMUSG00000009927	0.00337383	EU	EU
ENSMUSG00000024084	0.00338546	EU	EE
ENSMUSG00000038949	0.00341981	EU	UU
ENSMUSG00000004328	0.00343888	EU	UU
ENSMUSG00000070890	0.00344619	EU	EU
ENSMUSG00000027200	0.00346683	EU	DE
ENSMUSG00000003200	0.00347187	EU	DU
ENSMUSG00000022894	0.00347318	EU	EU
ENSMUSG00000026473	0.00347318	EU	UU
ENSMUSG00000034868	0.00349023	EU	DU
ENSMUSG00000051081	0.00358457	EU	EE
ENSMUSG00000060733	0.00360602	EU	DU
ENSMUSG00000018736	0.00366285	EU	UU
ENSMUSG00000020257	0.003715	EU	EE
ENSMUSG00000032431	0.0037383	EU	DE
ENSMUSG00000029920	0.00376291	EU	DU
ENSMUSG00000013089	0.00378001	EU	EE
ENSMUSG00000074817	0.00378001	EU	EU
ENSMUSG00000052151	0.0038024	EU	DU
ENSMUSG00000047213	0.00380262	EU	DU
ENSMUSG00000020794	0.00386889	EU	DU
ENSMUSG00000024758	0.00386889	EU	DU
ENSMUSG00000032998	0.00388924	EU	UU
ENSMUSG00000025134	0.00394962	EU	EU
ENSMUSG00000020020	0.00398165	EU	EE
ENSMUSG00000067344	0.00407532	EU	EU
ENSMUSG00000031902	0.00411807	EU	EU
ENSMUSG00000036916	0.00411807	EU	DU
ENSMUSG00000028647	0.00413377	EU	DU
ENSMUSG00000037211	0.00418009	EU	UU
ENSMUSG00000081044	0.00418009	EU	EU
ENSMUSG00000022091	0.00424226	EU	EU
ENSMUSG00000016239	0.004302	EU	EU
ENSMUSG00000030769	0.0043116	EU	EE
ENSMUSG00000008348	0.0043729	EU	DU
ENSMUSG00000059775	0.0044689	EU	UU
ENSMUSG00000021981	0.00447861	EU	DU
ENSMUSG00000039680	0.00448617	EU	ED
ENSMUSG00000034120	0.0045295	EU	EE
ENSMUSG00000051234	0.00457749	EU	ED
ENSMUSG00000053286	0.00462242	EU	ED
ENSMUSG00000031516	0.00462594	EU	UD
ENSMUSG00000024947	0.00468357	EU	EU
ENSMUSG00000017144	0.00472951	EU	EU
ENSMUSG00000024642	0.00472951	EU	DU
ENSMUSG00000031197	0.00472951	EU	EU
ENSMUSG00000024083	0.00475664	EU	DE
ENSMUSG00000065990	0.00477395	EU	ED
ENSMUSG00000034391	0.00477751	EU	EE
ENSMUSG00000061374	0.00478766	EU	UU
ENSMUSG00000022223	0.00487643	EU	EE
ENSMUSG00000036781	0.00493467	EU	EU
ENSMUSG00000027765	0.00493716	EU	EE
ENSMUSG00000020948	0.0051086	EU	UE
ENSMUSG00000039474	0.0051968	EU	UU
ENSMUSG00000031796	0.00533182	EU	DE
ENSMUSG00000022265	0.00547956	EU	DU
ENSMUSG00000020439	0.005594	EU	EE
ENSMUSG00000048047	0.005594	EU	EE
ENSMUSG00000018481	0.00562448	EU	DU
ENSMUSG00000064063	0.00563818	EU	EU
ENSMUSG00000100592	0.00574487	EU	EU
ENSMUSG00000026646	0.00581659	EU	DU
ENSMUSG00000090013	0.00582446	EU	EE
ENSMUSG00000034593	0.0058364	EU	DU
ENSMUSG00000064145	0.0058364	EU	DU
ENSMUSG00000083139	0.00585525	EU	ED
ENSMUSG00000059070	0.00621106	EU	DU
ENSMUSG00000000740	0.00623669	EU	EU
ENSMUSG00000041037	0.00631921	EU	EU
ENSMUSG00000020358	0.0063921	EU	UE
ENSMUSG00000038379	0.00641172	EU	EU
ENSMUSG00000038803	0.00641478	EU	DE
ENSMUSG00000022905	0.00644945	EU	UU
ENSMUSG00000037712	0.00658287	EU	DU
ENSMUSG00000028851	0.00678287	EU	UU
ENSMUSG00000035967	0.00680978	EU	DU
ENSMUSG00000028538	0.00685009	EU	EE
ENSMUSG00000033107	0.0069253	EU	EU
ENSMUSG00000033446	0.0069253	EU	EU
ENSMUSG00000092576	0.00693175	EU	EU
ENSMUSG00000028793	0.00694945	EU	DU
ENSMUSG00000066441	0.00699978	EU	UU
ENSMUSG00000069114	0.0070057	EU	DU
ENSMUSG00000019888	0.00701882	EU	DU
ENSMUSG00000007379	0.00704462	EU	EE
ENSMUSG00000021379	0.00718792	EU	EE
ENSMUSG00000030346	0.00727401	EU	ED
ENSMUSG00000082676	0.00728973	EU	EU
ENSMUSG00000028012	0.00729596	EU	DU
ENSMUSG00000005233	0.00740245	EU	UU
ENSMUSG00000058748	0.00757413	EU	EE
ENSMUSG00000002820	0.00771887	EU	EE
ENSMUSG00000021792	0.00771887	EU	DU
ENSMUSG00000027782	0.00771887	EU	EE
ENSMUSG00000061082	0.00772297	EU	ED
ENSMUSG00000031530	0.00777172	EU	DU
ENSMUSG00000054065	0.00777172	EU	DE
ENSMUSG00000020937	0.00780105	EU	EE
ENSMUSG00000081231	0.00780105	EU	DE
ENSMUSG00000020185	0.00788789	EU	DU
ENSMUSG00000100618	0.00813146	EU	UU
ENSMUSG00000018415	0.0083756	EU	DU
ENSMUSG00000029634	0.00842006	EU	EE
ENSMUSG00000040363	0.00843601	EU	EU
ENSMUSG00000085342	0.00867262	EU	EU
ENSMUSG00000027427	0.00867388	EU	EU
ENSMUSG00000061062	0.00870831	EU	EE
ENSMUSG00000037736	0.00873555	EU	EE
ENSMUSG00000011096	0.00875178	EU	UU
ENSMUSG00000041477	0.00890087	EU	EE
ENSMUSG00000016757	0.00892338	EU	EE
ENSMUSG00000003190	0.00930986	EU	ED
ENSMUSG00000086324	0.00938617	EU	UE
ENSMUSG00000015869	0.00944227	EU	UU
ENSMUSG00000034773	0.00948624	EU	UE
ENSMUSG00000055839	0.00953362	EU	DE
ENSMUSG00000029578	0.00971147	EU	EE
ENSMUSG00000042797	0.00971716	EU	EU
ENSMUSG00000081406	0.00971716	EU	EE
ENSMUSG00000001918	0.0097215	EU	DU
ENSMUSG00000081998	0.00972752	EU	EU
ENSMUSG00000041852	0.00975276	EU	EU
ENSMUSG00000072594	0.00976679	EU	EU
ENSMUSG00000055323	0.00985628	EU	EE
ENSMUSG00000029236	0.00989209	EU	EE
ENSMUSG00000051046	0.0099547	EU	EE
ENSMUSG00000082905	0.0100573	EU	EE
ENSMUSG00000023008	0.0100707	EU	UU
ENSMUSG00000059495	0.0101188	EU	UU
ENSMUSG00000037536	0.0102502	EU	DE
ENSMUSG00000026708	0.0102683	EU	EU
ENSMUSG00000035151	0.01032	EU	DU
ENSMUSG00000025935	0.0103486	EU	DU
ENSMUSG00000029500	0.0103768	EU	ED
ENSMUSG00000022408	0.0103962	EU	EE
ENSMUSG00000029147	0.0105099	EU	UU
ENSMUSG00000038070	0.0105139	EU	DU
ENSMUSG00000033634	0.0105913	EU	UU
ENSMUSG00000038279	0.0107722	EU	EU
ENSMUSG00000066979	0.0107722	EU	ED
ENSMUSG00000010760	0.0108435	EU	EE
ENSMUSG00000074365	0.0110184	EU	EU
ENSMUSG00000026103	0.0112194	EU	DU
ENSMUSG00000071267	0.0114164	EU	EU
ENSMUSG00000024480	0.0114798	EU	DU
ENSMUSG00000103362	0.0115685	EU	EE
ENSMUSG00000028156	0.0115799	EU	EU
ENSMUSG00000027959	0.0115924	EU	EU
ENSMUSG00000050640	0.0115924	EU	EE
ENSMUSG00000009092	0.0118473	EU	DU
ENSMUSG00000021681	0.0119419	EU	EE
ENSMUSG00000044068	0.0119524	EU	DU
ENSMUSG00000037071	0.0121922	EU	EU
ENSMUSG00000025582	0.0122129	EU	EE
ENSMUSG00000032840	0.0123317	EU	UU
ENSMUSG00000081308	0.0123581	EU	EU
ENSMUSG00000101834	0.0126819	EU	EE
ENSMUSG00000075284	0.0128491	EU	UE
ENSMUSG00000060393	0.012851	EU	EU
ENSMUSG00000061787	0.0128537	EU	EE
ENSMUSG00000040836	0.0128759	EU	EU
ENSMUSG00000032555	0.012929	EU	EU
ENSMUSG00000042182	0.0129566	EU	EE
ENSMUSG00000030738	0.0131286	EU	UE
ENSMUSG00000047045	0.0131344	EU	EE
ENSMUSG00000060402	0.0132028	EU	EE
ENSMUSG00000066839	0.0132931	EU	DU
ENSMUSG00000041815	0.0134217	EU	EU
ENSMUSG00000095588	0.0134217	EU	EU
ENSMUSG00000027601	0.0135015	EU	DU
ENSMUSG00000100546	0.0135374	EU	DU
ENSMUSG00000103574	0.0135374	EU	EU
ENSMUSG00000036615	0.0136889	EU	EU
ENSMUSG00000002881	0.0137048	EU	DU
ENSMUSG00000016534	0.0138206	EU	EU
ENSMUSG00000055723	0.0138284	EU	DU
ENSMUSG00000031367	0.0139407	EU	DU
ENSMUSG00000046785	0.0139407	EU	EU
ENSMUSG00000045210	0.0140127	EU	EE
ENSMUSG00000063065	0.0141131	EU	DU
ENSMUSG00000022330	0.0141874	EU	EU
ENSMUSG00000038462	0.0142022	EU	ED
ENSMUSG00000062284	0.0144261	EU	EU
ENSMUSG00000020018	0.0146821	EU	DU
ENSMUSG00000032059	0.0146821	EU	UE
ENSMUSG00000018727	0.0148989	EU	EU
ENSMUSG00000050628	0.0151333	EU	EU
ENSMUSG00000028800	0.015205	EU	EU
ENSMUSG00000043929	0.015205	EU	EU
ENSMUSG00000021125	0.0152999	EU	UU
ENSMUSG00000085770	0.015302	EU	UE
ENSMUSG00000029621	0.0153711	EU	DE
ENSMUSG00000021548	0.0155985	EU	EU
ENSMUSG00000030672	0.0157538	EU	EE
ENSMUSG00000101210	0.0161031	EU	EE
ENSMUSG00000034486	0.0161471	EU	EU
ENSMUSG00000022672	0.0162475	EU	EE
ENSMUSG00000027803	0.0162475	EU	EE
ENSMUSG00000028463	0.0164954	EU	UU
ENSMUSG00000082998	0.0166407	EU	EE
ENSMUSG00000057454	0.0167968	EU	UU
ENSMUSG00000030717	0.0169845	EU	EE
ENSMUSG00000024529	0.0170173	EU	ED
ENSMUSG00000015085	0.0170719	EU	DE
ENSMUSG00000030677	0.0173136	EU	UE
ENSMUSG00000025041	0.0176654	EU	EU
ENSMUSG00000022329	0.0177774	EU	DU
ENSMUSG00000024427	0.0180699	EU	UU
ENSMUSG00000036106	0.0182477	EU	UU
ENSMUSG00000086725	0.0182477	EU	EE
ENSMUSG00000092203	0.0182742	EU	EU
ENSMUSG00000001542	0.0183953	EU	EU
ENSMUSG00000041718	0.0183953	EU	EU
ENSMUSG00000059890	0.0184462	EU	EU
ENSMUSG00000026601	0.0187704	EU	UU
ENSMUSG00000032308	0.0187977	EU	ED
ENSMUSG00000034552	0.0190579	EU	EU
ENSMUSG00000090673	0.0191444	EU	EU
ENSMUSG00000090714	0.0191459	EU	EU
ENSMUSG00000037416	0.0193145	EU	DU
ENSMUSG00000027177	0.0193475	EU	DU
ENSMUSG00000021665	0.0193838	EU	EU
ENSMUSG00000036853	0.0193878	EU	EE
ENSMUSG00000020390	0.0194505	EU	UU
ENSMUSG00000020427	0.019732	EU	ED
ENSMUSG00000046192	0.019732	EU	EU
ENSMUSG00000028284	0.0197746	EU	DU
ENSMUSG00000093421	0.0197746	EU	EU
ENSMUSG00000029192	0.0200485	EU	EU
ENSMUSG00000031059	0.0200485	EU	UE
ENSMUSG00000068117	0.0200485	EU	EE
ENSMUSG00000074794	0.0203824	EU	UU
ENSMUSG00000103658	0.0203824	EU	EU
ENSMUSG00000000148	0.0206315	EU	UU
ENSMUSG00000006673	0.0208504	EU	EU
ENSMUSG00000068037	0.0209054	EU	UE
ENSMUSG00000039543	0.0209392	EU	ED
ENSMUSG00000025161	0.0210252	EU	EU
ENSMUSG00000048720	0.0210252	EU	EU
ENSMUSG00000032199	0.0211144	EU	ED
ENSMUSG00000093727	0.0211865	EU	EU
ENSMUSG00000023764	0.0214723	EU	EE
ENSMUSG00000035992	0.0215425	EU	DU
ENSMUSG00000096001	0.0217451	EU	DE
ENSMUSG00000039349	0.0217964	EU	UE
ENSMUSG00000001998	0.0219225	EU	EE
ENSMUSG00000037400	0.0219291	EU	DU
ENSMUSG00000041377	0.0222749	EU	EE
ENSMUSG00000006057	0.0225226	EU	EE
ENSMUSG00000058006	0.0225292	EU	UU
ENSMUSG00000055692	0.0227672	EU	EU
ENSMUSG00000039252	0.0229479	EU	DU
ENSMUSG00000036376	0.0231665	EU	DU
ENSMUSG00000053687	0.0233113	EU	EU
ENSMUSG00000057858	0.0237812	EU	UE
ENSMUSG00000060550	0.0237858	EU	EU
ENSMUSG00000021701	0.023892	EU	DU
ENSMUSG00000047676	0.0239057	EU	EU
ENSMUSG00000024563	0.0242775	EU	DU
ENSMUSG00000086380	0.0244088	EU	ED
ENSMUSG00000030382	0.0245539	EU	EU
ENSMUSG00000084249	0.0249009	EU	EE
ENSMUSG00000086321	0.0249256	EU	DU
ENSMUSG00000082953	0.0249597	EU	EE
ENSMUSG00000029422	0.025074	EU	UE
ENSMUSG00000055298	0.0253299	EU	EE
ENSMUSG00000011256	0.0255015	EU	EE
ENSMUSG00000037461	0.0255357	EU	EE
ENSMUSG00000103572	0.0255557	EU	EE
ENSMUSG00000045078	0.025585	EU	EE
ENSMUSG00000104496	0.025585	EU	UU
ENSMUSG00000038047	0.0258321	EU	EU
ENSMUSG00000020387	0.0258498	EU	UU
ENSMUSG00000024687	0.0259275	EU	EU
ENSMUSG00000054199	0.0259704	EU	UU
ENSMUSG00000084034	0.0260795	EU	EU
ENSMUSG00000059920	0.0261119	EU	EU
ENSMUSG00000015053	0.0261143	EU	EE
ENSMUSG00000036285	0.0264818	EU	DU
ENSMUSG00000005103	0.0265352	EU	DU
ENSMUSG00000033760	0.0267936	EU	DU
ENSMUSG00000020889	0.0274257	EU	UE
ENSMUSG00000044147	0.0274671	EU	EE
ENSMUSG00000092416	0.02782	EU	DU
ENSMUSG00000029086	0.0278674	EU	DU
ENSMUSG00000026361	0.0279335	EU	EU
ENSMUSG00000014294	0.0279677	EU	EE
ENSMUSG00000079584	0.028048	EU	DU
ENSMUSG00000031729	0.0282758	EU	EE
ENSMUSG00000055963	0.0282758	EU	DU
ENSMUSG00000031683	0.0285038	EU	DU
ENSMUSG00000067336	0.0289533	EU	DU
ENSMUSG00000031431	0.0292221	EU	EU
ENSMUSG00000078877	0.0293514	EU	EE
ENSMUSG00000034602	0.0293863	EU	UU
ENSMUSG00000003970	0.0295816	EU	UE
ENSMUSG00000021752	0.0298306	EU	EU
ENSMUSG00000081476	0.0303301	EU	EE
ENSMUSG00000046351	0.0307068	EU	DU
ENSMUSG00000037331	0.0307072	EU	UU
ENSMUSG00000028557	0.0307355	EU	EU
ENSMUSG00000032346	0.0307683	EU	UD
ENSMUSG00000031075	0.0308997	EU	ED
ENSMUSG00000082313	0.0310011	EU	EE
ENSMUSG00000026021	0.0310592	EU	EE
ENSMUSG00000060657	0.0311084	EU	EU
ENSMUSG00000027079	0.0311158	EU	UU
ENSMUSG00000040167	0.0311323	EU	EU
ENSMUSG00000028843	0.0311798	EU	UE
ENSMUSG00000056917	0.0311798	EU	UU
ENSMUSG00000030093	0.0312024	EU	DE
ENSMUSG00000035666	0.0313769	EU	UE
ENSMUSG00000055403	0.0313769	EU	EU
ENSMUSG00000074366	0.0313769	EU	EE
ENSMUSG00000058046	0.0315847	EU	EU
ENSMUSG00000024521	0.0320285	EU	EE
ENSMUSG00000028558	0.0321113	EU	DU
ENSMUSG00000062526	0.0321285	EU	EU
ENSMUSG00000014767	0.0321855	EU	EU
ENSMUSG00000085787	0.0322976	EU	DU
ENSMUSG00000068859	0.0327125	EU	EE
ENSMUSG00000094084	0.0327125	EU	EU
ENSMUSG00000021692	0.0328881	EU	EE
ENSMUSG00000046743	0.0330463	EU	EE
ENSMUSG00000079808	0.0330818	EU	EU
ENSMUSG00000058690	0.0336206	EU	DU
ENSMUSG00000074580	0.0337314	EU	EU
ENSMUSG00000024391	0.0338053	EU	EU
ENSMUSG00000085385	0.0342405	EU	EU
ENSMUSG00000082189	0.034468	EU	EU
ENSMUSG00000026356	0.0345023	EU	EU
ENSMUSG00000054727	0.0347229	EU	EU
ENSMUSG00000016256	0.0347424	EU	UU
ENSMUSG00000068879	0.0347551	EU	EE
ENSMUSG00000033769	0.0347667	EU	DU
ENSMUSG00000048924	0.0348045	EU	EU
ENSMUSG00000008475	0.034978	EU	DE
ENSMUSG00000025921	0.0350852	EU	DU
ENSMUSG00000101337	0.0350852	EU	EU
ENSMUSG00000026577	0.0354412	EU	EU
ENSMUSG00000056380	0.0355704	EU	EE
ENSMUSG00000038374	0.035575	EU	EU
ENSMUSG00000049422	0.0356599	EU	DU
ENSMUSG00000083227	0.0357549	EU	EU
ENSMUSG00000074500	0.0357942	EU	EU
ENSMUSG00000050965	0.0359304	EU	EE
ENSMUSG00000039956	0.0360566	EU	UU
ENSMUSG00000073412	0.0360566	EU	EE
ENSMUSG00000025246	0.0362468	EU	EU
ENSMUSG00000044149	0.0362468	EU	EU
ENSMUSG00000021666	0.0364078	EU	UU
ENSMUSG00000022114	0.036483	EU	EU
ENSMUSG00000066838	0.036483	EU	EE
ENSMUSG00000084968	0.0366342	EU	EU
ENSMUSG00000079575	0.0369018	EU	UE
ENSMUSG00000033450	0.0370267	EU	EE
ENSMUSG00000041126	0.037097	EU	EU
ENSMUSG00000061397	0.0373155	EU	UU
ENSMUSG00000052406	0.0374354	EU	UE
ENSMUSG00000029434	0.0375426	EU	UU
ENSMUSG00000071266	0.0379423	EU	UU
ENSMUSG00000025068	0.0380418	EU	EE
ENSMUSG00000027660	0.0381262	EU	EU
ENSMUSG00000027940	0.0381964	EU	EE
ENSMUSG00000037239	0.0383408	EU	UE
ENSMUSG00000025223	0.0383741	EU	DU
ENSMUSG00000007670	0.0388566	EU	UU
ENSMUSG00000036442	0.0390541	EU	EU
ENSMUSG00000022855	0.0391646	EU	EU
ENSMUSG00000096696	0.0391646	EU	EE
ENSMUSG00000021377	0.0392483	EU	DU
ENSMUSG00000022514	0.0392483	EU	DE
ENSMUSG00000020903	0.0393081	EU	EE
ENSMUSG00000039342	0.0396143	EU	EE
ENSMUSG00000037279	0.0399865	EU	EU
ENSMUSG00000045284	0.0399865	EU	EE
ENSMUSG00000079225	0.0399865	EU	EU
ENSMUSG00000100826	0.0402082	EU	DE
ENSMUSG00000028180	0.0404262	EU	DU
ENSMUSG00000030911	0.0404262	EU	DU
ENSMUSG00000004895	0.0405664	EU	EU
ENSMUSG00000034867	0.0405664	EU	UU
ENSMUSG00000053877	0.0408837	EU	EE
ENSMUSG00000074863	0.0410899	EU	EU
ENSMUSG00000028700	0.0411746	EU	EE
ENSMUSG00000052949	0.0411746	EU	EE
ENSMUSG00000020464	0.0412837	EU	DE
ENSMUSG00000080790	0.0414757	EU	EU
ENSMUSG00000024063	0.0415009	EU	DU
ENSMUSG00000015217	0.0416285	EU	EE
ENSMUSG00000030031	0.0416632	EU	DU
ENSMUSG00000031400	0.0418129	EU	UU
ENSMUSG00000003528	0.0419329	EU	DU
ENSMUSG00000030019	0.0419329	EU	EU
ENSMUSG00000060240	0.0420706	EU	EE
ENSMUSG00000004096	0.0422095	EU	EE
ENSMUSG00000000838	0.0423651	EU	UE
ENSMUSG00000102591	0.0424511	EU	UU
ENSMUSG00000020423	0.0425728	EU	DU
ENSMUSG00000026773	0.0425989	EU	EE
ENSMUSG00000035129	0.0425989	EU	DU
ENSMUSG00000054604	0.0425989	EU	EU
ENSMUSG00000073633	0.0426083	EU	EU
ENSMUSG00000020386	0.0427583	EU	UU
ENSMUSG00000040112	0.0428429	EU	UD
ENSMUSG00000020434	0.0438499	EU	EU
ENSMUSG00000020611	0.0439211	EU	DU
ENSMUSG00000071350	0.044015	EU	EU
ENSMUSG00000085236	0.044015	EU	EU
ENSMUSG00000062309	0.0441244	EU	EU
ENSMUSG00000062393	0.04444	EU	DU
ENSMUSG00000033963	0.0445038	EU	UE
ENSMUSG00000048249	0.0445459	EU	EU
ENSMUSG00000005262	0.0446999	EU	DU
ENSMUSG00000025219	0.0451223	EU	EU
ENSMUSG00000053656	0.0451223	EU	EE
ENSMUSG00000068154	0.0451223	EU	DU
ENSMUSG00000017412	0.0451364	EU	EE
ENSMUSG00000083626	0.0453319	EU	EU
ENSMUSG00000078184	0.0453661	EU	EU
ENSMUSG00000063229	0.0455039	EU	EU
ENSMUSG00000002833	0.045594	EU	DU
ENSMUSG00000086728	0.0457327	EU	EU
ENSMUSG00000047369	0.0457813	EU	EE
ENSMUSG00000030061	0.0458118	EU	DU
ENSMUSG00000041939	0.0458301	EU	EU
ENSMUSG00000097911	0.0462538	EU	UU
ENSMUSG00000070867	0.0464332	EU	EU
ENSMUSG00000040325	0.0464339	EU	DU
ENSMUSG00000032324	0.0470287	EU	EE
ENSMUSG00000079966	0.0470287	EU	EU
ENSMUSG00000036067	0.0470355	EU	EE
ENSMUSG00000030604	0.047339	EU	EE
ENSMUSG00000050312	0.0475288	EU	EU
ENSMUSG00000063273	0.0476051	EU	EE
ENSMUSG00000022556	0.0477638	EU	DU
ENSMUSG00000001518	0.0477651	EU	EE
ENSMUSG00000026641	0.0479576	EU	DU
ENSMUSG00000037161	0.0481565	EU	EU
ENSMUSG00000010142	0.0484697	EU	UE
ENSMUSG00000030629	0.0484811	EU	DU
ENSMUSG00000038593	0.0485183	EU	EU
ENSMUSG00000031837	0.0488284	EU	UE
ENSMUSG00000046791	0.0490344	EU	EU
ENSMUSG00000004500	0.0491415	EU	EE
ENSMUSG00000003068	0.0493719	EU	UU
