# Supplementary material for: Stella modulates transcriptional and endogenous retrovirus programs during maternal-to-zygotic transition
Source: eLife journal article supplement (doi:10.7554/elife.22345), 2017-03-21
Supplement: supp [file elife-22345-supp-v1.zip › elife_poa_e22345_Figure_2_source_data_1.xlsx]

## Sheet: UP
Figure 2 – source data 1. List of enriched GO terms in genes upregulated in Stella M/Z KO 2-cell embryos compared with wild-type. GO terms enriched for bioloigcal processes were calculated using DAVID software (version 6.7). Adjusted p value <0.05.
Category	GO ID	GO description	adjusted P Value
GOTERM_BP_FAT	GO:0045184	establishment of protein localization	3.10952e-12
GOTERM_BP_FAT	GO:0015031	protein transport	5.02803e-12
GOTERM_BP_FAT	GO:0008104	protein localization	4.01036e-11
GOTERM_BP_FAT	GO:0007049	cell cycle	1.52874e-07
GOTERM_BP_FAT	GO:0006793	phosphorus metabolic process	1.53963e-06
GOTERM_BP_FAT	GO:0006796	phosphate metabolic process	1.53963e-06
GOTERM_BP_FAT	GO:0034613	cellular protein localization	3.09035e-06
GOTERM_BP_FAT	GO:0070727	cellular macromolecule localization	3.65975e-06
GOTERM_BP_FAT	GO:0022402	cell cycle process	5.4963e-06
GOTERM_BP_FAT	GO:0016568	chromatin modification	7.29587e-06
GOTERM_BP_FAT	GO:0006886	intracellular protein transport	1.55853e-05
GOTERM_BP_FAT	GO:0022403	cell cycle phase	2.98687e-05
GOTERM_BP_FAT	GO:0046907	intracellular transport	3.16837e-05
GOTERM_BP_FAT	GO:0016569	covalent chromatin modification	3.30482e-05
GOTERM_BP_FAT	GO:0043623	cellular protein complex assembly	5.07078e-05
GOTERM_BP_FAT	GO:0016310	phosphorylation	5.2833e-05
GOTERM_BP_FAT	GO:0006259	DNA metabolic process	0.000138313
GOTERM_BP_FAT	GO:0006468	protein amino acid phosphorylation	0.000140458
GOTERM_BP_FAT	GO:0007017	microtubule-based process	0.000195042
GOTERM_BP_FAT	GO:0016570	histone modification	0.000223697
GOTERM_BP_FAT	GO:0016192	vesicle-mediated transport	0.000226506
GOTERM_BP_FAT	GO:0007010	cytoskeleton organization	0.000250275
GOTERM_BP_FAT	GO:0006325	chromatin organization	0.000258311
GOTERM_BP_FAT	GO:0070271	protein complex biogenesis	0.000291731
GOTERM_BP_FAT	GO:0006461	protein complex assembly	0.000291731
GOTERM_BP_FAT	GO:0051276	chromosome organization	0.00038513
GOTERM_BP_FAT	GO:0001701	in utero embryonic development	0.000462805
GOTERM_BP_FAT	GO:0000279	M phase	0.000615658
GOTERM_BP_FAT	GO:0070646	protein modification by small protein removal	0.000751568
GOTERM_BP_FAT	GO:0010604	positive regulation of macromolecule metabolic process	0.00144427
GOTERM_BP_FAT	GO:0051321	meiotic cell cycle	0.00168175
GOTERM_BP_FAT	GO:0045935	positive regulation of nucleobase, nucleoside, nucleotide and nucleic acid metabolic process	0.00174926
GOTERM_BP_FAT	GO:0032012	regulation of ARF protein signal transduction	0.00241047
GOTERM_BP_FAT	GO:0016579	protein deubiquitination	0.00267867
GOTERM_BP_FAT	GO:0006974	response to DNA damage stimulus	0.0029954
GOTERM_BP_FAT	GO:0051056	regulation of small GTPase mediated signal transduction	0.0030555
GOTERM_BP_FAT	GO:0051173	positive regulation of nitrogen compound metabolic process	0.00326593
GOTERM_BP_FAT	GO:0045941	positive regulation of transcription	0.0032954
GOTERM_BP_FAT	GO:0007242	intracellular signaling cascade	0.00372673
GOTERM_BP_FAT	GO:0045449	regulation of transcription	0.00374484
GOTERM_BP_FAT	GO:0051327	M phase of meiotic cell cycle	0.00385586
GOTERM_BP_FAT	GO:0006916	anti-apoptosis	0.00385586
GOTERM_BP_FAT	GO:0007126	meiosis	0.00385586
GOTERM_BP_FAT	GO:0016311	dephosphorylation	0.00391512
GOTERM_BP_FAT	GO:0045893	positive regulation of transcription, DNA-dependent	0.00394111
GOTERM_BP_FAT	GO:0006350	transcription	0.00418581
GOTERM_BP_FAT	GO:0043632	modification-dependent macromolecule catabolic process	0.00436474
GOTERM_BP_FAT	GO:0019941	modification-dependent protein catabolic process	0.00436474
GOTERM_BP_FAT	GO:0051254	positive regulation of RNA metabolic process	0.00446762
GOTERM_BP_FAT	GO:0032880	regulation of protein localization	0.00469254
GOTERM_BP_FAT	GO:0016044	membrane organization	0.00484754
GOTERM_BP_FAT	GO:0043009	chordate embryonic development	0.00485152
GOTERM_BP_FAT	GO:0006605	protein targeting	0.00490687
GOTERM_BP_FAT	GO:0019953	sexual reproduction	0.00548213
GOTERM_BP_FAT	GO:0010628	positive regulation of gene expression	0.00552491
GOTERM_BP_FAT	GO:0009792	embryonic development ending in birth or egg hatching	0.00570115
GOTERM_BP_FAT	GO:0046578	regulation of Ras protein signal transduction	0.00600703
GOTERM_BP_FAT	GO:0065003	macromolecular complex assembly	0.00604444
GOTERM_BP_FAT	GO:0030163	protein catabolic process	0.00605796
GOTERM_BP_FAT	GO:0034622	cellular macromolecular complex assembly	0.00632834
GOTERM_BP_FAT	GO:0051640	organelle localization	0.00687869
GOTERM_BP_FAT	GO:0043933	macromolecular complex subunit organization	0.00715089
GOTERM_BP_FAT	GO:0000278	mitotic cell cycle	0.00746035
GOTERM_BP_FAT	GO:0043069	negative regulation of programmed cell death	0.00746035
GOTERM_BP_FAT	GO:0030865	cortical cytoskeleton organization	0.00751601
GOTERM_BP_FAT	GO:0060548	negative regulation of cell death	0.00785522
GOTERM_BP_FAT	GO:0034621	cellular macromolecular complex subunit organization	0.00785522
GOTERM_BP_FAT	GO:0046903	secretion	0.00789649
GOTERM_BP_FAT	GO:0032940	secretion by cell	0.00815221
GOTERM_BP_FAT	GO:0018212	peptidyl-tyrosine modification	0.00823
GOTERM_BP_FAT	GO:0018108	peptidyl-tyrosine phosphorylation	0.00823
GOTERM_BP_FAT	GO:0031328	positive regulation of cellular biosynthetic process	0.00828534
GOTERM_BP_FAT	GO:0006281	DNA repair	0.00833461
GOTERM_BP_FAT	GO:0043967	histone H4 acetylation	0.00919571
GOTERM_BP_FAT	GO:0007167	enzyme linked receptor protein signaling pathway	0.00933976
GOTERM_BP_FAT	GO:0010557	positive regulation of macromolecule biosynthetic process	0.00955396
GOTERM_BP_FAT	GO:0009891	positive regulation of biosynthetic process	0.00981511
GOTERM_BP_FAT	GO:0043066	negative regulation of apoptosis	0.0107325
GOTERM_BP_FAT	GO:0000077	DNA damage checkpoint	0.0107463
GOTERM_BP_FAT	GO:0019220	regulation of phosphate metabolic process	0.0107573
GOTERM_BP_FAT	GO:0051174	regulation of phosphorus metabolic process	0.0107573
GOTERM_BP_FAT	GO:0051603	proteolysis involved in cellular protein catabolic process	0.0110651
GOTERM_BP_FAT	GO:0000226	microtubule cytoskeleton organization	0.0113323
GOTERM_BP_FAT	GO:0044257	cellular protein catabolic process	0.0122379
GOTERM_BP_FAT	GO:0012501	programmed cell death	0.0128116
GOTERM_BP_FAT	GO:0007276	gamete generation	0.0131423
GOTERM_BP_FAT	GO:0048609	reproductive process in a multicellular organism	0.0134599
GOTERM_BP_FAT	GO:0032504	multicellular organism reproduction	0.0134599
GOTERM_BP_FAT	GO:0006305	DNA alkylation	0.0136758
GOTERM_BP_FAT	GO:0006306	DNA methylation	0.0136758
GOTERM_BP_FAT	GO:0010629	negative regulation of gene expression	0.0139785
GOTERM_BP_FAT	GO:0006470	protein amino acid dephosphorylation	0.0141343
GOTERM_BP_FAT	GO:0045892	negative regulation of transcription, DNA-dependent	0.014521
GOTERM_BP_FAT	GO:0051325	interphase	0.0150848
GOTERM_BP_FAT	GO:0006915	apoptosis	0.01529
GOTERM_BP_FAT	GO:0070647	protein modification by small protein conjugation or removal	0.0154007
GOTERM_BP_FAT	GO:0051253	negative regulation of RNA metabolic process	0.0157607
GOTERM_BP_FAT	GO:0009057	macromolecule catabolic process	0.0160113
GOTERM_BP_FAT	GO:0010605	negative regulation of macromolecule metabolic process	0.0161106
GOTERM_BP_FAT	GO:0006304	DNA modification	0.016385
GOTERM_BP_FAT	GO:0031570	DNA integrity checkpoint	0.0170345
GOTERM_BP_FAT	GO:0006260	DNA replication	0.0176502
GOTERM_BP_FAT	GO:0010558	negative regulation of macromolecule biosynthetic process	0.0185287
GOTERM_BP_FAT	GO:0051726	regulation of cell cycle	0.0191808
GOTERM_BP_FAT	GO:0042325	regulation of phosphorylation	0.0197283
GOTERM_BP_FAT	GO:0006282	regulation of DNA repair	0.0203928
GOTERM_BP_FAT	GO:0033365	protein localization in organelle	0.0209568
GOTERM_BP_FAT	GO:0044265	cellular macromolecule catabolic process	0.0214339
GOTERM_BP_FAT	GO:0007169	transmembrane receptor protein tyrosine kinase signaling pathway	0.021795
GOTERM_BP_FAT	GO:0045934	negative regulation of nucleobase, nucleoside, nucleotide and nucleic acid metabolic process	0.0223
GOTERM_BP_FAT	GO:0006611	protein export from nucleus	0.0224193
GOTERM_BP_FAT	GO:0030030	cell projection organization	0.0224623
GOTERM_BP_FAT	GO:0045944	positive regulation of transcription from RNA polymerase II promoter	0.0224713
GOTERM_BP_FAT	GO:0048232	male gamete generation	0.0224728
GOTERM_BP_FAT	GO:0007283	spermatogenesis	0.0224728
GOTERM_BP_FAT	GO:0016481	negative regulation of transcription	0.0232073
GOTERM_BP_FAT	GO:0032886	regulation of microtubule-based process	0.0233238
GOTERM_BP_FAT	GO:0006887	exocytosis	0.0235505
GOTERM_BP_FAT	GO:0016265	death	0.0236124
GOTERM_BP_FAT	GO:0008219	cell death	0.0250473
GOTERM_BP_FAT	GO:0051172	negative regulation of nitrogen compound metabolic process	0.0253967
GOTERM_BP_FAT	GO:0044087	regulation of cellular component biogenesis	0.0265453
GOTERM_BP_FAT	GO:0051168	nuclear export	0.026573
GOTERM_BP_FAT	GO:0032989	cellular component morphogenesis	0.027905
GOTERM_BP_FAT	GO:0033554	cellular response to stress	0.0280069
GOTERM_BP_FAT	GO:0016458	gene silencing	0.0280127
GOTERM_BP_FAT	GO:0007259	JAK-STAT cascade	0.0306969
GOTERM_BP_FAT	GO:0031110	regulation of microtubule polymerization or depolymerization	0.0306969
GOTERM_BP_FAT	GO:0032870	cellular response to hormone stimulus	0.0307392
GOTERM_BP_FAT	GO:0009890	negative regulation of biosynthetic process	0.0310167
GOTERM_BP_FAT	GO:0032318	regulation of Ras GTPase activity	0.0312759
GOTERM_BP_FAT	GO:0043543	protein amino acid acylation	0.0321066
GOTERM_BP_FAT	GO:0040029	regulation of gene expression, epigenetic	0.0340454
GOTERM_BP_FAT	GO:0048489	synaptic vesicle transport	0.0352009
GOTERM_BP_FAT	GO:0043087	regulation of GTPase activity	0.035259
GOTERM_BP_FAT	GO:0051329	interphase of mitotic cell cycle	0.035466
GOTERM_BP_FAT	GO:0006342	chromatin silencing	0.0356632
GOTERM_BP_FAT	GO:0010765	positive regulation of sodium ion transport	0.0360415
GOTERM_BP_FAT	GO:0002524	hypersensitivity	0.0360415
GOTERM_BP_FAT	GO:0002438	acute inflammatory response to antigenic stimulus	0.0360415
GOTERM_BP_FAT	GO:0006357	regulation of transcription from RNA polymerase II promoter	0.036275
GOTERM_BP_FAT	GO:0032313	regulation of Rab GTPase activity	0.0363253
GOTERM_BP_FAT	GO:0032483	regulation of Rab protein signal transduction	0.0363253
GOTERM_BP_FAT	GO:0006730	one-carbon metabolic process	0.0366633
GOTERM_BP_FAT	GO:0043414	biopolymer methylation	0.0368627
GOTERM_BP_FAT	GO:0031113	regulation of microtubule polymerization	0.0373534
GOTERM_BP_FAT	GO:0033043	regulation of organelle organization	0.0381346
GOTERM_BP_FAT	GO:0051301	cell division	0.0388765
GOTERM_BP_FAT	GO:0051051	negative regulation of transport	0.0398352
GOTERM_BP_FAT	GO:0034504	protein localization in nucleus	0.0399941
GOTERM_BP_FAT	GO:0000271	polysaccharide biosynthetic process	0.0400918
GOTERM_BP_FAT	GO:0051258	protein polymerization	0.0405083
GOTERM_BP_FAT	GO:0031327	negative regulation of cellular biosynthetic process	0.0411412
GOTERM_BP_FAT	GO:0006913	nucleocytoplasmic transport	0.042993
GOTERM_BP_FAT	GO:0043269	regulation of ion transport	0.0434505
GOTERM_BP_FAT	GO:0000075	cell cycle checkpoint	0.0469077
GOTERM_BP_FAT	GO:0045814	negative regulation of gene expression, epigenetic	0.0486921
GOTERM_BP_FAT	GO:0051169	nuclear transport	0.0487538
GOTERM_BP_FAT	GO:0006351	transcription, DNA-dependent	0.0487631
GOTERM_BP_FAT	GO:0007243	protein kinase cascade	0.0494857
GOTERM_BP_FAT	GO:0080135	regulation of cellular response to stress	0.0497135
GOTERM_BP_FAT	GO:0009914	hormone transport	0.0497552
GOTERM_BP_FAT	GO:0032386	regulation of intracellular transport	0.0497552

## Sheet: DOWN
Figure 2 – source data 1. List of enriched GO terms in genes downregulated in Stella M/Z KO 2-cell embryos compared with wild-type. GO terms enriched for bioloigcal processes were calculated using DAVID software (version 6.7). Adjusted p value <0.05.
Category	GO ID	GO description	adjusted P Value
GOTERM_BP_FAT	GO:0010467	gene expression	4.27708e-26
GOTERM_BP_FAT	GO:0016070	RNA metabolic process	4.1503e-22
GOTERM_BP_FAT	GO:0034645	cellular macromolecule biosynthetic process	1.68896e-21
GOTERM_BP_FAT	GO:0006396	RNA processing	1.0254e-13
GOTERM_BP_FAT	GO:0006412	translation	7.2207e-13
GOTERM_BP_FAT	GO:0043604	amide biosynthetic process	7.8789e-13
GOTERM_BP_FAT	GO:0043043	peptide biosynthetic process	1.32653e-12
GOTERM_BP_FAT	GO:0051171	regulation of nitrogen compound metabolic process	3.99096e-12
GOTERM_BP_FAT	GO:0010556	regulation of macromolecule biosynthetic process	7.50192e-12
GOTERM_BP_FAT	GO:0019219	regulation of nucleobase-containing compound metabolic process	1.02175e-11
GOTERM_BP_FAT	GO:0022613	ribonucleoprotein complex biogenesis	1.13024e-11
GOTERM_BP_FAT	GO:0018130	heterocycle biosynthetic process	1.67799e-11
GOTERM_BP_FAT	GO:0043603	cellular amide metabolic process	2.16412e-11
GOTERM_BP_FAT	GO:0051252	regulation of RNA metabolic process	2.3182e-11
GOTERM_BP_FAT	GO:0034654	nucleobase-containing compound biosynthetic process	2.37876e-11
GOTERM_BP_FAT	GO:0019438	aromatic compound biosynthetic process	2.72006e-11
GOTERM_BP_FAT	GO:2000112	regulation of cellular macromolecule biosynthetic process	3.07743e-11
GOTERM_BP_FAT	GO:0032774	RNA biosynthetic process	5.0399e-11
GOTERM_BP_FAT	GO:0006518	peptide metabolic process	6.25749e-11
GOTERM_BP_FAT	GO:0008380	RNA splicing	6.67275e-11
GOTERM_BP_FAT	GO:0010468	regulation of gene expression	7.03893e-11
GOTERM_BP_FAT	GO:0097659	nucleic acid-templated transcription	8.36777e-11
GOTERM_BP_FAT	GO:0006351	transcription, DNA-templated	1.57077e-10
GOTERM_BP_FAT	GO:2001141	regulation of RNA biosynthetic process	3.26597e-10
GOTERM_BP_FAT	GO:1903506	regulation of nucleic acid-templated transcription	4.59701e-10
GOTERM_BP_FAT	GO:0006397	mRNA processing	5.28207e-10
GOTERM_BP_FAT	GO:0006355	regulation of transcription, DNA-templated	6.90182e-10
GOTERM_BP_FAT	GO:1901566	organonitrogen compound biosynthetic process	9.02952e-10
GOTERM_BP_FAT	GO:0042254	ribosome biogenesis	1.01435e-09
GOTERM_BP_FAT	GO:1903047	mitotic cell cycle process	1.45182e-08
GOTERM_BP_FAT	GO:0007049	cell cycle	3.33392e-08
GOTERM_BP_FAT	GO:0000278	mitotic cell cycle	3.35404e-08
GOTERM_BP_FAT	GO:0016071	mRNA metabolic process	3.64402e-08
GOTERM_BP_FAT	GO:0051276	chromosome organization	2.26602e-07
GOTERM_BP_FAT	GO:0043933	macromolecular complex subunit organization	2.9556e-07
GOTERM_BP_FAT	GO:0000398	mRNA splicing, via spliceosome	4.25615e-07
GOTERM_BP_FAT	GO:0000377	RNA splicing, via transesterification reactions with bulged adenosine as nucleophile	4.25615e-07
GOTERM_BP_FAT	GO:0000375	RNA splicing, via transesterification reactions	4.7028e-07
GOTERM_BP_FAT	GO:0022402	cell cycle process	9.11192e-07
GOTERM_BP_FAT	GO:0010557	positive regulation of macromolecule biosynthetic process	2.39288e-06
GOTERM_BP_FAT	GO:0034622	cellular macromolecular complex assembly	3.89438e-06
GOTERM_BP_FAT	GO:0051301	cell division	4.52064e-06
GOTERM_BP_FAT	GO:0044772	mitotic cell cycle phase transition	6.86792e-06
GOTERM_BP_FAT	GO:0000280	nuclear division	6.91039e-06
GOTERM_BP_FAT	GO:0006361	transcription initiation from RNA polymerase I promoter	6.96078e-06
GOTERM_BP_FAT	GO:0000245	spliceosomal complex assembly	7.74074e-06
GOTERM_BP_FAT	GO:0071826	ribonucleoprotein complex subunit organization	8.64245e-06
GOTERM_BP_FAT	GO:0022618	ribonucleoprotein complex assembly	9.43962e-06
GOTERM_BP_FAT	GO:0010628	positive regulation of gene expression	1.01705e-05
GOTERM_BP_FAT	GO:0007067	mitotic nuclear division	1.15459e-05
GOTERM_BP_FAT	GO:0048285	organelle fission	1.16014e-05
GOTERM_BP_FAT	GO:0044085	cellular component biogenesis	1.52665e-05
GOTERM_BP_FAT	GO:0051173	positive regulation of nitrogen compound metabolic process	1.67063e-05
GOTERM_BP_FAT	GO:0034508	centromere complex assembly	2.30613e-05
GOTERM_BP_FAT	GO:0051253	negative regulation of RNA metabolic process	2.56317e-05
GOTERM_BP_FAT	GO:0044770	cell cycle phase transition	2.57507e-05
GOTERM_BP_FAT	GO:0051254	positive regulation of RNA metabolic process	2.64513e-05
GOTERM_BP_FAT	GO:0006325	chromatin organization	2.77974e-05
GOTERM_BP_FAT	GO:0045934	negative regulation of nucleobase-containing compound metabolic process	2.92647e-05
GOTERM_BP_FAT	GO:0007059	chromosome segregation	2.95022e-05
GOTERM_BP_FAT	GO:0034660	ncRNA metabolic process	3.01548e-05
GOTERM_BP_FAT	GO:0010604	positive regulation of macromolecule metabolic process	3.29002e-05
GOTERM_BP_FAT	GO:0042273	ribosomal large subunit biogenesis	3.77335e-05
GOTERM_BP_FAT	GO:1903508	positive regulation of nucleic acid-templated transcription	5.30329e-05
GOTERM_BP_FAT	GO:0045893	positive regulation of transcription, DNA-templated	5.30329e-05
GOTERM_BP_FAT	GO:1902680	positive regulation of RNA biosynthetic process	5.80647e-05
GOTERM_BP_FAT	GO:0031328	positive regulation of cellular biosynthetic process	6.26925e-05
GOTERM_BP_FAT	GO:0009891	positive regulation of biosynthetic process	6.51483e-05
GOTERM_BP_FAT	GO:0031055	chromatin remodeling at centromere	7.14062e-05
GOTERM_BP_FAT	GO:0034470	ncRNA processing	8.24191e-05
GOTERM_BP_FAT	GO:0045935	positive regulation of nucleobase-containing compound metabolic process	8.66168e-05
GOTERM_BP_FAT	GO:0051172	negative regulation of nitrogen compound metabolic process	8.79418e-05
GOTERM_BP_FAT	GO:0010558	negative regulation of macromolecule biosynthetic process	8.91676e-05
GOTERM_BP_FAT	GO:0016567	protein ubiquitination	0.000108988
GOTERM_BP_FAT	GO:1902679	negative regulation of RNA biosynthetic process	0.000119365
GOTERM_BP_FAT	GO:1903507	negative regulation of nucleic acid-templated transcription	0.000122811
GOTERM_BP_FAT	GO:0045892	negative regulation of transcription, DNA-templated	0.000131347
GOTERM_BP_FAT	GO:0006403	RNA localization	0.000132613
GOTERM_BP_FAT	GO:0033036	macromolecule localization	0.00013737
GOTERM_BP_FAT	GO:0006376	mRNA splice site selection	0.000146724
GOTERM_BP_FAT	GO:0000183	chromatin silencing at rDNA	0.000151464
GOTERM_BP_FAT	GO:0006364	rRNA processing	0.000153136
GOTERM_BP_FAT	GO:0009890	negative regulation of biosynthetic process	0.000159169
GOTERM_BP_FAT	GO:0006352	DNA-templated transcription, initiation	0.000180593
GOTERM_BP_FAT	GO:0044843	cell cycle G1/S phase transition	0.00018548
GOTERM_BP_FAT	GO:0000082	G1/S transition of mitotic cell cycle	0.000189984
GOTERM_BP_FAT	GO:0006357	regulation of transcription from RNA polymerase II promoter	0.000200071
GOTERM_BP_FAT	GO:0065003	macromolecular complex assembly	0.000232421
GOTERM_BP_FAT	GO:0031325	positive regulation of cellular metabolic process	0.000235947
GOTERM_BP_FAT	GO:0010629	negative regulation of gene expression	0.000238615
GOTERM_BP_FAT	GO:0071166	ribonucleoprotein complex localization	0.00024134
GOTERM_BP_FAT	GO:0016072	rRNA metabolic process	0.000245304
GOTERM_BP_FAT	GO:0006270	DNA replication initiation	0.000328952
GOTERM_BP_FAT	GO:0009893	positive regulation of metabolic process	0.000350562
GOTERM_BP_FAT	GO:2000113	negative regulation of cellular macromolecule biosynthetic process	0.0003595
GOTERM_BP_FAT	GO:0006366	transcription from RNA polymerase II promoter	0.000386375
GOTERM_BP_FAT	GO:0032446	protein modification by small protein conjugation	0.000398437
GOTERM_BP_FAT	GO:0007005	mitochondrion organization	0.000485862
GOTERM_BP_FAT	GO:0050657	nucleic acid transport	0.000505103
GOTERM_BP_FAT	GO:0050658	RNA transport	0.000505103
GOTERM_BP_FAT	GO:0031327	negative regulation of cellular biosynthetic process	0.000567076
GOTERM_BP_FAT	GO:0044257	cellular protein catabolic process	0.000584644
GOTERM_BP_FAT	GO:0051236	establishment of RNA localization	0.0006532
GOTERM_BP_FAT	GO:0050684	regulation of mRNA processing	0.000773635
GOTERM_BP_FAT	GO:0006405	RNA export from nucleus	0.000821849
GOTERM_BP_FAT	GO:0045814	negative regulation of gene expression, epigenetic	0.000869098
GOTERM_BP_FAT	GO:0033365	protein localization to organelle	0.000986707
GOTERM_BP_FAT	GO:0006360	transcription from RNA polymerase I promoter	0.00103109
GOTERM_BP_FAT	GO:0051641	cellular localization	0.00120456
GOTERM_BP_FAT	GO:0009892	negative regulation of metabolic process	0.00122363
GOTERM_BP_FAT	GO:0000727	double-strand break repair via break-induced replication	0.0012454
GOTERM_BP_FAT	GO:0015931	nucleobase-containing compound transport	0.00126293
GOTERM_BP_FAT	GO:0008104	protein localization	0.00127953
GOTERM_BP_FAT	GO:0045787	positive regulation of cell cycle	0.00128447
GOTERM_BP_FAT	GO:0042274	ribosomal small subunit biogenesis	0.00131793
GOTERM_BP_FAT	GO:0033554	cellular response to stress	0.00136161
GOTERM_BP_FAT	GO:0006342	chromatin silencing	0.00144423
GOTERM_BP_FAT	GO:0044248	cellular catabolic process	0.00151594
GOTERM_BP_FAT	GO:0031324	negative regulation of cellular metabolic process	0.00159583
GOTERM_BP_FAT	GO:0071426	ribonucleoprotein complex export from nucleus	0.00165344
GOTERM_BP_FAT	GO:0042255	ribosome assembly	0.00165344
GOTERM_BP_FAT	GO:0000462	maturation of SSU-rRNA from tricistronic rRNA transcript (SSU-rRNA, 5.8S rRNA, LSU-rRNA)	0.00174126
GOTERM_BP_FAT	GO:0044265	cellular macromolecule catabolic process	0.00177221
GOTERM_BP_FAT	GO:0071824	protein-DNA complex subunit organization	0.00179118
GOTERM_BP_FAT	GO:0051603	proteolysis involved in cellular protein catabolic process	0.00180895
GOTERM_BP_FAT	GO:0065004	protein-DNA complex assembly	0.00189683
GOTERM_BP_FAT	GO:0097193	intrinsic apoptotic signaling pathway	0.00214151
GOTERM_BP_FAT	GO:0051338	regulation of transferase activity	0.00221817
GOTERM_BP_FAT	GO:0009108	coenzyme biosynthetic process	0.00232728
GOTERM_BP_FAT	GO:0010605	negative regulation of macromolecule metabolic process	0.00254394
GOTERM_BP_FAT	GO:0051297	centrosome organization	0.00300616
GOTERM_BP_FAT	GO:0015031	protein transport	0.00312706
GOTERM_BP_FAT	GO:0051188	cofactor biosynthetic process	0.00317243
GOTERM_BP_FAT	GO:0030490	maturation of SSU-rRNA	0.00322991
GOTERM_BP_FAT	GO:0045737	positive regulation of cyclin-dependent protein serine/threonine kinase activity	0.00333314
GOTERM_BP_FAT	GO:0006664	glycolipid metabolic process	0.00335056
GOTERM_BP_FAT	GO:0006085	acetyl-CoA biosynthetic process	0.00339186
GOTERM_BP_FAT	GO:0006511	ubiquitin-dependent protein catabolic process	0.0034611
GOTERM_BP_FAT	GO:0030163	protein catabolic process	0.00350703
GOTERM_BP_FAT	GO:1903509	liposaccharide metabolic process	0.00365505
GOTERM_BP_FAT	GO:0006974	cellular response to DNA damage stimulus	0.00365583
GOTERM_BP_FAT	GO:0022607	cellular component assembly	0.00383326
GOTERM_BP_FAT	GO:1904031	positive regulation of cyclin-dependent protein kinase activity	0.00386467
GOTERM_BP_FAT	GO:0006643	membrane lipid metabolic process	0.00390646
GOTERM_BP_FAT	GO:0051168	nuclear export	0.00422027
GOTERM_BP_FAT	GO:1903311	regulation of mRNA metabolic process	0.00422027
GOTERM_BP_FAT	GO:0000002	mitochondrial genome maintenance	0.00438557
GOTERM_BP_FAT	GO:0006383	transcription from RNA polymerase III promoter	0.00445809
GOTERM_BP_FAT	GO:0045184	establishment of protein localization	0.0045602
GOTERM_BP_FAT	GO:0000122	negative regulation of transcription from RNA polymerase II promoter	0.00472202
GOTERM_BP_FAT	GO:0019941	modification-dependent protein catabolic process	0.00472463
GOTERM_BP_FAT	GO:0010212	response to ionizing radiation	0.004733
GOTERM_BP_FAT	GO:0040029	regulation of gene expression, epigenetic	0.00479559
GOTERM_BP_FAT	GO:0006261	DNA-dependent DNA replication	0.00488404
GOTERM_BP_FAT	GO:0006354	DNA-templated transcription, elongation	0.0053026
GOTERM_BP_FAT	GO:0032259	methylation	0.00588246
GOTERM_BP_FAT	GO:0008654	phospholipid biosynthetic process	0.00590245
GOTERM_BP_FAT	GO:0031023	microtubule organizing center organization	0.00606024
GOTERM_BP_FAT	GO:0043632	modification-dependent macromolecule catabolic process	0.00614594
GOTERM_BP_FAT	GO:0006086	acetyl-CoA biosynthetic process from pyruvate	0.00620787
GOTERM_BP_FAT	GO:0061732	mitochondrial acetyl-CoA biosynthetic process from pyruvate	0.00620787
GOTERM_BP_FAT	GO:0000075	cell cycle checkpoint	0.00657319
GOTERM_BP_FAT	GO:0034976	response to endoplasmic reticulum stress	0.00678847
GOTERM_BP_FAT	GO:0070647	protein modification by small protein conjugation or removal	0.00704833
GOTERM_BP_FAT	GO:0045944	positive regulation of transcription from RNA polymerase II promoter	0.00709772
GOTERM_BP_FAT	GO:0006997	nucleus organization	0.00750273
GOTERM_BP_FAT	GO:0001701	in utero embryonic development	0.007518
GOTERM_BP_FAT	GO:0051438	regulation of ubiquitin-protein transferase activity	0.00753854
GOTERM_BP_FAT	GO:0034613	cellular protein localization	0.00756115
GOTERM_BP_FAT	GO:1990542	mitochondrial transmembrane transport	0.00850758
GOTERM_BP_FAT	GO:0051348	negative regulation of transferase activity	0.00902336
GOTERM_BP_FAT	GO:0006986	response to unfolded protein	0.00932509
GOTERM_BP_FAT	GO:0070727	cellular macromolecule localization	0.00939216
GOTERM_BP_FAT	GO:0071616	acyl-CoA biosynthetic process	0.00940581
GOTERM_BP_FAT	GO:0035384	thioester biosynthetic process	0.00940581
GOTERM_BP_FAT	GO:0007127	meiosis I	0.010032
GOTERM_BP_FAT	GO:0016236	macroautophagy	0.010515
GOTERM_BP_FAT	GO:0043484	regulation of RNA splicing	0.0107518
GOTERM_BP_FAT	GO:0006913	nucleocytoplasmic transport	0.0107737
GOTERM_BP_FAT	GO:0043161	proteasome-mediated ubiquitin-dependent protein catabolic process	0.0111542
GOTERM_BP_FAT	GO:2000269	regulation of fibroblast apoptotic process	0.0118323
GOTERM_BP_FAT	GO:0043666	regulation of phosphoprotein phosphatase activity	0.0119631
GOTERM_BP_FAT	GO:0051169	nuclear transport	0.0122888
GOTERM_BP_FAT	GO:0006281	DNA repair	0.0127387
GOTERM_BP_FAT	GO:0046907	intracellular transport	0.0129242
GOTERM_BP_FAT	GO:0048024	regulation of mRNA splicing, via spliceosome	0.013169
GOTERM_BP_FAT	GO:0009057	macromolecule catabolic process	0.0133484
GOTERM_BP_FAT	GO:0002181	cytoplasmic translation	0.0135238
GOTERM_BP_FAT	GO:0016458	gene silencing	0.0135323
GOTERM_BP_FAT	GO:0006650	glycerophospholipid metabolic process	0.0138589
GOTERM_BP_FAT	GO:0031571	mitotic G1 DNA damage checkpoint	0.0143907
GOTERM_BP_FAT	GO:0007141	male meiosis I	0.0143907
GOTERM_BP_FAT	GO:0043486	histone exchange	0.0143907
GOTERM_BP_FAT	GO:0031508	pericentric heterochromatin assembly	0.0147229
GOTERM_BP_FAT	GO:0006084	acetyl-CoA metabolic process	0.0149636
GOTERM_BP_FAT	GO:0097421	liver regeneration	0.0149636
GOTERM_BP_FAT	GO:0046831	regulation of RNA export from nucleus	0.0162969
GOTERM_BP_FAT	GO:0001837	epithelial to mesenchymal transition	0.016505
GOTERM_BP_FAT	GO:0000027	ribosomal large subunit assembly	0.0172174
GOTERM_BP_FAT	GO:0044783	G1 DNA damage checkpoint	0.0172734
GOTERM_BP_FAT	GO:0044819	mitotic G1/S transition checkpoint	0.0172734
GOTERM_BP_FAT	GO:0000079	regulation of cyclin-dependent protein serine/threonine kinase activity	0.0181492
GOTERM_BP_FAT	GO:0006259	DNA metabolic process	0.018201
GOTERM_BP_FAT	GO:0010498	proteasomal protein catabolic process	0.019054
GOTERM_BP_FAT	GO:0098813	nuclear chromosome segregation	0.0193725
GOTERM_BP_FAT	GO:1904029	regulation of cyclin-dependent protein kinase activity	0.0195831
GOTERM_BP_FAT	GO:0006260	DNA replication	0.0199745
GOTERM_BP_FAT	GO:0045931	positive regulation of mitotic cell cycle	0.020295
GOTERM_BP_FAT	GO:0007289	spermatid nucleus differentiation	0.0204914
GOTERM_BP_FAT	GO:0031400	negative regulation of protein modification process	0.0206971
GOTERM_BP_FAT	GO:0051028	mRNA transport	0.0213578
GOTERM_BP_FAT	GO:0006661	phosphatidylinositol biosynthetic process	0.0217229
GOTERM_BP_FAT	GO:0034620	cellular response to unfolded protein	0.0226468
GOTERM_BP_FAT	GO:0071103	DNA conformation change	0.0231396
GOTERM_BP_FAT	GO:0046474	glycerophospholipid biosynthetic process	0.0237067
GOTERM_BP_FAT	GO:0070934	CRD-mediated mRNA stabilization	0.0237079
GOTERM_BP_FAT	GO:0034047	regulation of protein phosphatase type 2A activity	0.0237079
GOTERM_BP_FAT	GO:0006310	DNA recombination	0.0239453
GOTERM_BP_FAT	GO:1901990	regulation of mitotic cell cycle phase transition	0.0239453
GOTERM_BP_FAT	GO:0043044	ATP-dependent chromatin remodeling	0.0239728
GOTERM_BP_FAT	GO:0006368	transcription elongation from RNA polymerase II promoter	0.0239728
GOTERM_BP_FAT	GO:0034504	protein localization to nucleus	0.0239785
GOTERM_BP_FAT	GO:0071705	nitrogen compound transport	0.0246543
GOTERM_BP_FAT	GO:0097190	apoptotic signaling pathway	0.0248654
GOTERM_BP_FAT	GO:0019637	organophosphate metabolic process	0.0252131
GOTERM_BP_FAT	GO:0042558	pteridine-containing compound metabolic process	0.0252889
GOTERM_BP_FAT	GO:0035518	histone H2A monoubiquitination	0.0261702
GOTERM_BP_FAT	GO:0032239	regulation of nucleobase-containing compound transport	0.0261702
GOTERM_BP_FAT	GO:0072160	nephron tubule epithelial cell differentiation	0.0261702
GOTERM_BP_FAT	GO:0031507	heterochromatin assembly	0.0261702
GOTERM_BP_FAT	GO:0001824	blastocyst development	0.0269554
GOTERM_BP_FAT	GO:0098727	maintenance of cell number	0.0271463
GOTERM_BP_FAT	GO:0035966	response to topologically incorrect protein	0.0271848
GOTERM_BP_FAT	GO:0008284	positive regulation of cell proliferation	0.0272498
GOTERM_BP_FAT	GO:0000387	spliceosomal snRNP assembly	0.0284369
GOTERM_BP_FAT	GO:0045727	positive regulation of translation	0.0286936
GOTERM_BP_FAT	GO:2001251	negative regulation of chromosome organization	0.0288048
GOTERM_BP_FAT	GO:0070972	protein localization to endoplasmic reticulum	0.0292002
GOTERM_BP_FAT	GO:0006464	cellular protein modification process	0.0294928
GOTERM_BP_FAT	GO:0036211	protein modification process	0.0294928
GOTERM_BP_FAT	GO:0006338	chromatin remodeling	0.0316997
GOTERM_BP_FAT	GO:1901976	regulation of cell cycle checkpoint	0.0318221
GOTERM_BP_FAT	GO:0036503	ERAD pathway	0.0319849
GOTERM_BP_FAT	GO:1903504	regulation of mitotic spindle checkpoint	0.0320645
GOTERM_BP_FAT	GO:0090266	regulation of mitotic cell cycle spindle assembly checkpoint	0.0320645
GOTERM_BP_FAT	GO:0033173	calcineurin-NFAT signaling cascade	0.0322382
GOTERM_BP_FAT	GO:0010390	histone monoubiquitination	0.0322382
GOTERM_BP_FAT	GO:0045047	protein targeting to ER	0.0322382
GOTERM_BP_FAT	GO:0061458	reproductive system development	0.0342297
GOTERM_BP_FAT	GO:2000271	positive regulation of fibroblast apoptotic process	0.034364
GOTERM_BP_FAT	GO:0000395	mRNA 5'-splice site recognition	0.034364
GOTERM_BP_FAT	GO:0061641	CENP-A containing chromatin organization	0.034364
GOTERM_BP_FAT	GO:0034080	CENP-A containing nucleosome assembly	0.034364
GOTERM_BP_FAT	GO:1901987	regulation of cell cycle phase transition	0.0343753
GOTERM_BP_FAT	GO:0002831	regulation of response to biotic stimulus	0.0345963
GOTERM_BP_FAT	GO:0051649	establishment of localization in cell	0.0352281
GOTERM_BP_FAT	GO:0072332	intrinsic apoptotic signaling pathway by p53 class mediator	0.0354209
GOTERM_BP_FAT	GO:0030521	androgen receptor signaling pathway	0.0354487
GOTERM_BP_FAT	GO:0006302	double-strand break repair	0.0358995
GOTERM_BP_FAT	GO:0008213	protein alkylation	0.0359575
GOTERM_BP_FAT	GO:0006479	protein methylation	0.0359575
GOTERM_BP_FAT	GO:0060765	regulation of androgen receptor signaling pathway	0.0368692
GOTERM_BP_FAT	GO:0000132	establishment of mitotic spindle orientation	0.0368692
GOTERM_BP_FAT	GO:0016569	covalent chromatin modification	0.0376422
GOTERM_BP_FAT	GO:0031123	RNA 3'-end processing	0.0379422
GOTERM_BP_FAT	GO:0007093	mitotic cell cycle checkpoint	0.037952
GOTERM_BP_FAT	GO:0045292	mRNA cis splicing, via spliceosome	0.0385893
GOTERM_BP_FAT	GO:0071428	rRNA-containing ribonucleoprotein complex export from nucleus	0.0385893
GOTERM_BP_FAT	GO:0002862	negative regulation of inflammatory response to antigenic stimulus	0.0385893
GOTERM_BP_FAT	GO:0002437	inflammatory response to antigenic stimulus	0.0388152
GOTERM_BP_FAT	GO:0043414	macromolecule methylation	0.0409393
GOTERM_BP_FAT	GO:0070988	demethylation	0.0417719
GOTERM_BP_FAT	GO:0006760	folic acid-containing compound metabolic process	0.0418626
GOTERM_BP_FAT	GO:0030970	retrograde protein transport, ER to cytosol	0.0418626
GOTERM_BP_FAT	GO:0031365	N-terminal protein amino acid modification	0.0418626
GOTERM_BP_FAT	GO:1903513	endoplasmic reticulum to cytosol transport	0.0418626
GOTERM_BP_FAT	GO:0006914	autophagy	0.044099
GOTERM_BP_FAT	GO:1901991	negative regulation of mitotic cell cycle phase transition	0.0443221
GOTERM_BP_FAT	GO:0072331	signal transduction by p53 class mediator	0.0443221
GOTERM_BP_FAT	GO:0019827	stem cell population maintenance	0.0449876
GOTERM_BP_FAT	GO:0090407	organophosphate biosynthetic process	0.0454795
GOTERM_BP_FAT	GO:0048608	reproductive structure development	0.0455708
GOTERM_BP_FAT	GO:0051726	regulation of cell cycle	0.0456109
GOTERM_BP_FAT	GO:0000380	alternative mRNA splicing, via spliceosome	0.0457325
GOTERM_BP_FAT	GO:0006474	N-terminal protein amino acid acetylation	0.0457325
GOTERM_BP_FAT	GO:0042559	pteridine-containing compound biosynthetic process	0.0457325
GOTERM_BP_FAT	GO:0000724	double-strand break repair via homologous recombination	0.0462178
GOTERM_BP_FAT	GO:0018158	protein oxidation	0.0464964
GOTERM_BP_FAT	GO:0090267	positive regulation of mitotic cell cycle spindle assembly checkpoint	0.0464964
GOTERM_BP_FAT	GO:0007000	nucleolus organization	0.0464964
GOTERM_BP_FAT	GO:0070076	histone lysine demethylation	0.0472184
GOTERM_BP_FAT	GO:0008630	intrinsic apoptotic signaling pathway in response to DNA damage	0.0480283
GOTERM_BP_FAT	GO:1903364	positive regulation of cellular protein catabolic process	0.0480283
GOTERM_BP_FAT	GO:0045454	cell redox homeostasis	0.0482557
GOTERM_BP_FAT	GO:0046467	membrane lipid biosynthetic process	0.0489546
GOTERM_BP_FAT	GO:0000725	recombinational repair	0.0492189
GOTERM_BP_FAT	GO:0031396	regulation of protein ubiquitination	0.0498254
