# Supplementary material for: Stella modulates transcriptional and endogenous retrovirus programs during maternal-to-zygotic transition
Source: eLife journal article supplement (doi:10.7554/elife.22345), 2017-03-21
Supplement: supp [file elife-22345-supp-v1.zip › elife_poa_e22345_Figure_2_source_data_2.xlsx]

## Sheet: Sheet1
Figure 2 - source data 2. Genome-wide Dppa3 co-expression network analysis. Table shows ensemble ID and official names of genes exhibiting significant expression correlation with Dppa3 (Pearson Correlation |r| > 0.9)
ENSEMBLE ID	GENE	Pearson correlation
ENSMUSG00000046323	Dppa3	1
ENSMUSG00000085202	Gm15620	0.988268
ENSMUSG00000080241	Dppa3-ps	0.986389
ENSMUSG00000008333	Snrpb2	0.975837
ENSMUSG00000069678	Pcgf1	0.970435
ENSMUSG00000002477	Snrpd1	0.97033
ENSMUSG00000002797	Ggct	0.968999
ENSMUSG00000062275	Fbxw24	0.965443
ENSMUSG00000044502	Bod1	0.965198
ENSMUSG00000051695	Pcbp1	0.96447
ENSMUSG00000021772	Nkiras1	0.963578
ENSMUSG00000015671	Psma2	0.963404
ENSMUSG00000030282	Cmas	0.962387
ENSMUSG00000027968	Larp7	0.96225
ENSMUSG00000007867	1700019E19Rik	0.962146
ENSMUSG00000022111	Uchl3	0.961645
ENSMUSG00000034880	Mrpl34	0.960317
ENSMUSG00000030512	Snrpa1	0.95969
ENSMUSG00000029397	Rchy1	0.959659
ENSMUSG00000020372	Gnb2l1	0.95957
ENSMUSG00000082820	Gm13803	0.95909
ENSMUSG00000028609	Magoh	0.959055
ENSMUSG00000058301	Upf1	0.958935
ENSMUSG00000026083	Eif5b	0.958839
ENSMUSG00000028591	Pramef12	0.958797
ENSMUSG00000027160	Ccdc34	0.958707
ENSMUSG00000044538	Obox3-ps8	0.958152
ENSMUSG00000036992	Nxt1	0.958118
ENSMUSG00000024791	Cdca5	0.958024
ENSMUSG00000029432	Gbas	0.957821
ENSMUSG00000054310	Obox1	0.95777
ENSMUSG00000028010	Gar1	0.957759
ENSMUSG00000054087	Fbxw14	0.956442
ENSMUSG00000021645	Smn1	0.955533
ENSMUSG00000076434	Wfdc3	0.955511
ENSMUSG00000055933	Oosp3	0.955456
ENSMUSG00000074369	Obox2	0.955141
ENSMUSG00000035337	Uchl4	0.955124
ENSMUSG00000031839	Hsbp1	0.954839
ENSMUSG00000042489	Clspn	0.954483
ENSMUSG00000041777	Cir1	0.954127
ENSMUSG00000038750	Omt2b	0.954093
ENSMUSG00000084113	Gm14277	0.95408
ENSMUSG00000042606	Hirip3	0.953883
ENSMUSG00000022109	Med4	0.953214
ENSMUSG00000037958	Nsrp1	0.95288
ENSMUSG00000019715	Gle1	0.952858
ENSMUSG00000025979	Mob4	0.952725
ENSMUSG00000066359	Tcl1b1	0.952687
ENSMUSG00000085079	Khdc1b	0.952536
ENSMUSG00000052763	Zfp212	0.952424
ENSMUSG00000048100	Taf13	0.952195
ENSMUSG00000082896	Gm5844	0.952135
ENSMUSG00000051256	Jagn1	0.952135
ENSMUSG00000001105	Ift20	0.95197
ENSMUSG00000020083	2010107G23Rik	0.951962
ENSMUSG00000034575	Papd7	0.950995
ENSMUSG00000037096	Gm9762	0.95095
ENSMUSG00000045291	E330021D16Rik	0.950849
ENSMUSG00000036513	Commd2	0.950135
ENSMUSG00000027752	Exosc8	0.950095
ENSMUSG00000052033	Pfdn4	0.949911
ENSMUSG00000041995	Zbed3	0.949747
ENSMUSG00000020863	Luc7l3	0.949639
ENSMUSG00000089999	Gm6485	0.949493
ENSMUSG00000061755	Bod1l	0.949342
ENSMUSG00000026799	Med27	0.948656
ENSMUSG00000017119	Nbr1	0.948256
ENSMUSG00000035242	Oaz1	0.948115
ENSMUSG00000043801	Oaz1-ps	0.948039
ENSMUSG00000031660	Brd7	0.94802
ENSMUSG00000060416	Gm839	0.947992
ENSMUSG00000051517	Arhgef39	0.947746
ENSMUSG00000060863	Tcl1b2	0.947609
ENSMUSG00000010095	Slc3a2	0.947401
ENSMUSG00000040532	Abhd11	0.947336
ENSMUSG00000010608	Rbm25	0.94727
ENSMUSG00000028443	Nudt2	0.947201
ENSMUSG00000043059	Zfp513	0.947017
ENSMUSG00000092558	Med20	0.946884
ENSMUSG00000008393	Carhsp1	0.946846
ENSMUSG00000020415	Pttg1	0.94677
ENSMUSG00000032623	Oas1d	0.946275
ENSMUSG00000029388	Eif2b1	0.94615
ENSMUSG00000022961	Son	0.94603
ENSMUSG00000024190	Dusp1	0.945959
ENSMUSG00000039473	Ubn1	0.94579
ENSMUSG00000024258	Polr2d	0.945745
ENSMUSG00000074061	Fbxw19	0.945728
ENSMUSG00000059796	Eif4a1	0.945633
ENSMUSG00000049832	Gm9840	0.945615
ENSMUSG00000022400	Rbx1	0.945281
ENSMUSG00000030287	Itpr2	0.945137
ENSMUSG00000103433	Gm2272	0.944919
ENSMUSG00000031783	Polr2c	0.944891
ENSMUSG00000078515	Ddi2	0.944874
ENSMUSG00000036572	Upf3b	0.944844
ENSMUSG00000009073	Nf2	0.944784
ENSMUSG00000070002	Ell	0.944697
ENSMUSG00000074062	Fbxw16	0.94466
ENSMUSG00000066463	Omt2a	0.944649
ENSMUSG00000037966	Ninj1	0.944621
ENSMUSG00000079184	Mphosph8	0.944531
ENSMUSG00000025868	Higd2a	0.944385
ENSMUSG00000025724	Sec11a	0.944298
ENSMUSG00000021270	Hsp90aa1	0.943958
ENSMUSG00000016409	Nkap	0.943829
ENSMUSG00000038871	Bpgm	0.943813
ENSMUSG00000028078	Dclk2	0.943692
ENSMUSG00000002870	Mcm2	0.943673
ENSMUSG00000047777	Phf13	0.942675
ENSMUSG00000042133	Ppig	0.942617
ENSMUSG00000041857	Oosp1	0.94237
ENSMUSG00000082683	Gm12697	0.942156
ENSMUSG00000070324	Fbxw22	0.942017
ENSMUSG00000070572	Trmt112-ps2	0.941859
ENSMUSG00000047227	Gm527	0.941856
ENSMUSG00000025393	Atp5b	0.941855
ENSMUSG00000030942	Thumpd1	0.941726
ENSMUSG00000019897	Ccdc59	0.941495
ENSMUSG00000014504	Srp19	0.941476
ENSMUSG00000027439	Gzf1	0.941435
ENSMUSG00000046201	Scaf8	0.94134
ENSMUSG00000063870	Chd4	0.94106
ENSMUSG00000040034	Nup43	0.940613
ENSMUSG00000002308	Cd320	0.940448
ENSMUSG00000006932	Ctnnb1	0.940184
ENSMUSG00000018395	Kif3a	0.939945
ENSMUSG00000033904	Ccp110	0.93992
ENSMUSG00000059474	Mbtd1	0.939838
ENSMUSG00000030750	Nsmce1	0.939807
ENSMUSG00000016559	H3f3b	0.939705
ENSMUSG00000039103	Nexn	0.939669
ENSMUSG00000041130	Zfp598	0.939635
ENSMUSG00000095913	Gm21844	0.939388
ENSMUSG00000022205	Sub1	0.939293
ENSMUSG00000027635	Dsn1	0.939288
ENSMUSG00000016946	Kctd5	0.939076
ENSMUSG00000034883	Lrr1	0.939065
ENSMUSG00000036270	Edc4	0.939061
ENSMUSG00000032551	1110059G10Rik	0.938973
ENSMUSG00000031487	Brf2	0.938964
ENSMUSG00000101841	Gm11993	0.938903
ENSMUSG00000079007	Tcl1b4	0.938874
ENSMUSG00000032479	Map4	0.938665
ENSMUSG00000049588	Ccdc69	0.938566
ENSMUSG00000055452	Gm7353	0.938488
ENSMUSG00000030057	Cnbp	0.93826
ENSMUSG00000002748	Baz1b	0.938096
ENSMUSG00000001924	Uba1	0.938068
ENSMUSG00000028798	Eif3i	0.937987
ENSMUSG00000082675	Gm6382	0.937975
ENSMUSG00000024969	Mark2	0.937887
ENSMUSG00000091900	Gm4353	0.937843
ENSMUSG00000028936	Rpl22	0.937311
ENSMUSG00000056124	B4galt6	0.937196
ENSMUSG00000083899	Gm12346	0.936925
ENSMUSG00000007880	Arid1a	0.936922
ENSMUSG00000104126	Gm37486	0.936817
ENSMUSG00000030852	Tacc2	0.936729
ENSMUSG00000085783	Gm9816	0.936546
ENSMUSG00000020482	Ccdc117	0.936411
ENSMUSG00000094530	Gm21399	0.936402
ENSMUSG00000041415	Dicer1	0.936288
ENSMUSG00000043831	Lysmd4	0.936125
ENSMUSG00000001674	Ddx18	0.935948
ENSMUSG00000020455	Trim11	0.935914
ENSMUSG00000029203	Ube2k	0.935518
ENSMUSG00000030060	Hmces	0.935476
ENSMUSG00000039929	Urb1	0.935365
ENSMUSG00000068882	Ssb	0.935141
ENSMUSG00000021420	Fars2	0.93511
ENSMUSG00000079215	Zfp664	0.935097
ENSMUSG00000042502	Cd2bp2	0.935085
ENSMUSG00000031823	Zdhhc7	0.935041
ENSMUSG00000014349	Ube2z	0.935001
ENSMUSG00000047324	4931429P17Rik	0.934992
ENSMUSG00000026134	Prim2	0.934862
ENSMUSG00000038683	Pak1ip1	0.934807
ENSMUSG00000000827	Tpd52l2	0.934801
ENSMUSG00000027746	Ufm1	0.934593
ENSMUSG00000002455	Prpf6	0.934391
ENSMUSG00000027944	Hax1	0.934365
ENSMUSG00000081451	Gm12734	0.934154
ENSMUSG00000031353	Rbbp7	0.934058
ENSMUSG00000006301	Tmbim1	0.933855
ENSMUSG00000028896	Rcc1	0.93381
ENSMUSG00000037013	Ss18	0.933745
ENSMUSG00000029687	Ezh2	0.933632
ENSMUSG00000041359	Tcl1	0.933539
ENSMUSG00000050424	Pnma5	0.933458
ENSMUSG00000022895	Ets2	0.933189
ENSMUSG00000032402	Smad3	0.933166
ENSMUSG00000058022	Adtrp	0.933008
ENSMUSG00000039770	Ypel5	0.932968
ENSMUSG00000007564	Ppp2r1a	0.93283
ENSMUSG00000032883	Acsl3	0.932744
ENSMUSG00000029427	Zcchc8	0.932348
ENSMUSG00000054446	Cpa1	0.932192
ENSMUSG00000005312	Ubqln1	0.932096
ENSMUSG00000045752	Tssc4	0.93204
ENSMUSG00000074059	Fbxw18	0.932017
ENSMUSG00000073018	Gm1070	0.931948
ENSMUSG00000039159	Ube2h	0.931912
ENSMUSG00000032254	Kif23	0.931885
ENSMUSG00000022023	Wbp4	0.93186
ENSMUSG00000032939	Nup93	0.931825
ENSMUSG00000045273	Cenph	0.931722
ENSMUSG00000030530	Furin	0.931664
ENSMUSG00000023572	Ccndbp1	0.931661
ENSMUSG00000025156	Gps1	0.931598
ENSMUSG00000021431	Snrnp48	0.931558
ENSMUSG00000029592	Usp30	0.931552
ENSMUSG00000031622	Sin3b	0.931465
ENSMUSG00000024145	Pigf	0.931406
ENSMUSG00000028394	Pole3	0.931312
ENSMUSG00000029505	Ep400	0.931257
ENSMUSG00000039735	Fnbp1l	0.931124
ENSMUSG00000034295	Fhod3	0.931025
ENSMUSG00000026999	Nup35	0.930983
ENSMUSG00000082163	Gm14276	0.930952
ENSMUSG00000048707	Tprn	0.930898
ENSMUSG00000030538	Cib1	0.930878
ENSMUSG00000025083	Afap1l2	0.930873
ENSMUSG00000030619	Eed	0.930701
ENSMUSG00000022420	Dnal4	0.930697
ENSMUSG00000042279	H1foo	0.930588
ENSMUSG00000026189	Pecr	0.930532
ENSMUSG00000031751	Amfr	0.930466
ENSMUSG00000002546	Golga2	0.930444
ENSMUSG00000001729	Akt1	0.930368
ENSMUSG00000071226	Cecr2	0.930341
ENSMUSG00000021384	Susd3	0.930297
ENSMUSG00000021947	Cryl1	0.930247
ENSMUSG00000030970	Ctbp2	0.930245
ENSMUSG00000045962	Wnk1	0.930217
ENSMUSG00000021532	Fastkd3	0.930183
ENSMUSG00000020739	Nup85	0.930013
ENSMUSG00000006307	Kmt2b	0.929863
ENSMUSG00000061589	Dot1l	0.929682
ENSMUSG00000025224	Gbf1	0.929597
ENSMUSG00000039055	Eme1	0.92947
ENSMUSG00000084786	Ubl5	0.929461
ENSMUSG00000024067	Dpy30	0.929422
ENSMUSG00000002332	Dhrs1	0.929286
ENSMUSG00000025982	Sf3b1	0.929233
ENSMUSG00000021936	Mapk8	0.928892
ENSMUSG00000036980	Taf6	0.928863
ENSMUSG00000028788	Ptp4a2	0.928857
ENSMUSG00000018326	Ywhab	0.92881
ENSMUSG00000084159	Gm12696	0.928708
ENSMUSG00000024446	Rpp21	0.928692
ENSMUSG00000034432	Cops8	0.928685
ENSMUSG00000028066	Pmf1	0.928495
ENSMUSG00000002076	Hsf2bp	0.928409
ENSMUSG00000033159	Cnppd1	0.928406
ENSMUSG00000037443	Cep85	0.928255
ENSMUSG00000000823	Znf512b	0.92822
ENSMUSG00000022010	Tsc22d1	0.928106
ENSMUSG00000009545	Kcnq1	0.928077
ENSMUSG00000019710	Mrpl24	0.928032
ENSMUSG00000001627	Ifrd1	0.927806
ENSMUSG00000001150	Mcm3ap	0.927788
ENSMUSG00000026034	Clk1	0.927748
ENSMUSG00000072694	1500011B03Rik	0.927499
ENSMUSG00000060373	Hnrnpc	0.927464
ENSMUSG00000007850	Hnrnph1	0.927444
ENSMUSG00000062352	Itgb1bp1	0.927428
ENSMUSG00000033579	Fa2h	0.927364
ENSMUSG00000036966	Spryd3	0.927244
ENSMUSG00000029513	Prkab1	0.927243
ENSMUSG00000030246	Ldhb	0.927232
ENSMUSG00000002107	Celf2	0.927212
ENSMUSG00000059013	Sh2d3c	0.927124
ENSMUSG00000018541	Cwc25	0.927121
ENSMUSG00000074884	Serf2	0.926882
ENSMUSG00000058073	Gm11189	0.92687
ENSMUSG00000021116	Eif2s1	0.926852
ENSMUSG00000102785	Gm2447	0.926819
ENSMUSG00000027881	Prpf38b	0.926673
ENSMUSG00000057193	Slc44a2	0.926594
ENSMUSG00000080818	Gm9434	0.926427
ENSMUSG00000082938	Gm2810	0.92635
ENSMUSG00000032191	Bcl2l10	0.926286
ENSMUSG00000029106	Add1	0.92618
ENSMUSG00000038909	Kat7	0.926176
ENSMUSG00000103104	Riok2***	0.926039
ENSMUSG00000028960	Ube4b	0.92599
ENSMUSG00000021577	Sdha	0.925961
ENSMUSG00000043633	Fam221b	0.925765
ENSMUSG00000040225	Prrc2c	0.925701
ENSMUSG00000021025	Nfkbia	0.92569
ENSMUSG00000021395	Spin1	0.925674
ENSMUSG00000028527	Ak4	0.925545
ENSMUSG00000028691	Prdx1	0.925487
ENSMUSG00000055065	Ddx17	0.925395
ENSMUSG00000091509	Gm17066	0.925316
ENSMUSG00000029089	Pacrgl	0.924934
ENSMUSG00000025577	Cbx2	0.924841
ENSMUSG00000022452	Smdt1	0.924833
ENSMUSG00000030105	Arl8b	0.924593
ENSMUSG00000033272	Slc35a4	0.924582
ENSMUSG00000053453	Thoc7	0.924519
ENSMUSG00000053581	Zfand2a	0.924499
ENSMUSG00000038116	Phf20	0.924492
ENSMUSG00000029405	G3bp2	0.924415
ENSMUSG00000038393	Txnip	0.924287
ENSMUSG00000083012	Fam220a	0.924123
ENSMUSG00000098220	Gm27031***	0.924117
ENSMUSG00000019849	Prep	0.924111
ENSMUSG00000085431	4930440I19Rik	0.924093
ENSMUSG00000057069	Ero1lb	0.923977
ENSMUSG00000032121	Tmem218	0.923892
ENSMUSG00000021814	Anxa7	0.923805
ENSMUSG00000031403	Dkc1	0.923733
ENSMUSG00000066306	Numa1	0.923689
ENSMUSG00000071172	Srsf3	0.923594
ENSMUSG00000028409	Smu1	0.923429
ENSMUSG00000054951	9130008F23Rik	0.92339
ENSMUSG00000043448	Gjc2	0.92339
ENSMUSG00000068348	Gm10238	0.92339
ENSMUSG00000073995	Gm10604	0.92339
ENSMUSG00000079414	Gm11110	0.92339
ENSMUSG00000081499	Gm12517	0.92339
ENSMUSG00000086238	Gm14258	0.92339
ENSMUSG00000095868	Gm23136	0.92339
ENSMUSG00000097857	Gm26603	0.92339
ENSMUSG00000082233	Gm6506	0.92339
ENSMUSG00000068243	Gm7079	0.92339
ENSMUSG00000038300	Pth2	0.92339
ENSMUSG00000051498	Tlr6	0.92339
ENSMUSG00000055235	Wdr86	0.92339
ENSMUSG00000085583	Gm15676***	0.92339
ENSMUSG00000098020	Gm27012***	0.92339
ENSMUSG00000040481	Bptf	0.923313
ENSMUSG00000032218	Ccnb2	0.923268
ENSMUSG00000052825	Gm9892	0.923217
ENSMUSG00000024589	Nedd4l	0.923214
ENSMUSG00000021555	Naa35	0.923085
ENSMUSG00000050810	Oog3	0.922847
ENSMUSG00000048164	Gm7204	0.92278
ENSMUSG00000010057	Nprl2	0.922771
ENSMUSG00000023723	Mrps23	0.922548
ENSMUSG00000021639	Gtf2h2	0.922532
ENSMUSG00000026755	Arpc5l	0.922437
ENSMUSG00000033940	Brk1	0.922404
ENSMUSG00000084098	Gm13422	0.922309
ENSMUSG00000028618	Tmem59	0.922301
ENSMUSG00000031767	Nudt7	0.922293
ENSMUSG00000047710	Champ1	0.922271
ENSMUSG00000029730	Mcm7	0.922237
ENSMUSG00000027706	Sec62	0.922199
ENSMUSG00000022020	Naa16	0.922108
ENSMUSG00000019775	Rgs17	0.92202
ENSMUSG00000068921	Dap3	0.92189
ENSMUSG00000024056	Ndc80	0.921676
ENSMUSG00000004642	Slbp	0.921563
ENSMUSG00000005566	Trim28	0.921524
ENSMUSG00000009535	Rnmt	0.921437
ENSMUSG00000027018	Hat1	0.92118
ENSMUSG00000012296	Tjap1	0.921029
ENSMUSG00000080916	Gm12463	0.92101
ENSMUSG00000040720	1110037F02Rik	0.920978
ENSMUSG00000002250	Ppard	0.920741
ENSMUSG00000029223	Uchl1	0.920724
ENSMUSG00000027340	Slc23a2	0.920722
ENSMUSG00000021500	Ddx46	0.920706
ENSMUSG00000074656	Eif2s2	0.920679
ENSMUSG00000033543	Gtf2a2	0.920473
ENSMUSG00000052488	Cherp	0.920445
ENSMUSG00000035629	1700021K19Rik	0.920364
ENSMUSG00000036893	Ehmt1	0.920234
ENSMUSG00000014554	Dguok	0.919734
ENSMUSG00000034349	Smc4	0.919694
ENSMUSG00000059119	Nap1l4	0.919685
ENSMUSG00000028455	Stoml2	0.919665
ENSMUSG00000028991	Mtor	0.919664
ENSMUSG00000025428	Atp5a1	0.919607
ENSMUSG00000031441	Atp11a	0.919497
ENSMUSG00000030521	Mphosph10	0.919454
ENSMUSG00000055204	Ankrd17	0.91937
ENSMUSG00000078812	Eif5a	0.919339
ENSMUSG00000029629	Phf14	0.918964
ENSMUSG00000025503	Taldo1	0.918921
ENSMUSG00000069041	Slc25a31	0.918867
ENSMUSG00000069237	Fam8a1	0.918836
ENSMUSG00000021113	Snapc1	0.918784
ENSMUSG00000016664	Pacsin2	0.91878
ENSMUSG00000043909	Trp53bp1	0.918775
ENSMUSG00000035798	Zdhhc17	0.918755
ENSMUSG00000099899	Gm28784	0.918535
ENSMUSG00000033902	Mapkbp1	0.918505
ENSMUSG00000020392	Cdkn2aipnl	0.918392
ENSMUSG00000034525	Ice1	0.918311
ENSMUSG00000044768	D1Ertd622e	0.91831
ENSMUSG00000045886	Gm9803	0.918307
ENSMUSG00000043733	Ptpn11	0.918165
ENSMUSG00000027652	Ralgapb	0.918142
ENSMUSG00000029616	Erp29	0.918026
ENSMUSG00000025403	Shmt2	0.917882
ENSMUSG00000083318	Gm15192	0.917824
ENSMUSG00000020098	Pcbd1	0.917823
ENSMUSG00000083700	Gm2986	0.917602
ENSMUSG00000028248	Pnisr	0.91758
ENSMUSG00000020495	Smg8	0.917573
ENSMUSG00000045328	Cenpe	0.91757
ENSMUSG00000024974	Smc3	0.917548
ENSMUSG00000001847	Rac1	0.917506
ENSMUSG00000006676	Usp19	0.91744
ENSMUSG00000051510	Mafg	0.917294
ENSMUSG00000027469	Tpx2	0.917107
ENSMUSG00000046721	Rpl14-ps1	0.917086
ENSMUSG00000030082	Sec61a1	0.917039
ENSMUSG00000032329	Hmg20a	0.917001
ENSMUSG00000020377	Ltc4s	0.916982
ENSMUSG00000098112	Bin2	0.916937
ENSMUSG00000025810	Nrp1	0.916901
ENSMUSG00000021242	Npc2	0.916853
ENSMUSG00000098506	Phf20-ps	0.91684
ENSMUSG00000037989	Wnk2	0.916709
ENSMUSG00000032434	Cmtm6	0.916585
ENSMUSG00000031835	Mbtps1	0.91652
ENSMUSG00000066406	Akap13	0.91634
ENSMUSG00000048833	Slc39a9	0.916052
ENSMUSG00000003166	Dgcr2	0.915821
ENSMUSG00000021716	Srek1ip1	0.915789
ENSMUSG00000023908	Pkmyt1	0.915772
ENSMUSG00000051255	Gm6563	0.91571
ENSMUSG00000038507	Parp12	0.91559
ENSMUSG00000058290	Espl1	0.915524
ENSMUSG00000022000	Zc3h13	0.91545
ENSMUSG00000025278	Flnb	0.915412
ENSMUSG00000046324	Ermp1	0.915404
ENSMUSG00000029910	Mad2l1	0.91539
ENSMUSG00000029036	Atad3a	0.915294
ENSMUSG00000039771	Polr2j	0.915249
ENSMUSG00000062380	Tubb3	0.915195
ENSMUSG00000032194	Kank2	0.915194
ENSMUSG00000019944	Rhobtb1	0.915152
ENSMUSG00000025885	Myo5b	0.914947
ENSMUSG00000037553	Zdhhc18	0.914945
ENSMUSG00000029649	Pomp	0.91476
ENSMUSG00000081151	Gm11448	0.914732
ENSMUSG00000000305	Cdh4	0.914715
ENSMUSG00000053754	Chd8	0.914706
ENSMUSG00000032633	Flcn	0.914678
ENSMUSG00000068876	Cgn	0.914381
ENSMUSG00000059058	Tma7-ps	0.914341
ENSMUSG00000026917	Wdr5	0.914273
ENSMUSG00000006418	Rnf114	0.914181
ENSMUSG00000061130	Ppm1b	0.914176
ENSMUSG00000066491	Gm6265	0.914133
ENSMUSG00000024927	Rela	0.914133
ENSMUSG00000009293	Ube2g2	0.914124
ENSMUSG00000026360	Rgs2	0.914086
ENSMUSG00000032412	Atp1b3	0.913985
ENSMUSG00000048170	Mcmbp	0.913703
ENSMUSG00000021636	Marveld2	0.913693
ENSMUSG00000020592	Sdc1	0.913651
ENSMUSG00000040345	Arhgap9	0.913648
ENSMUSG00000035247	Hectd1	0.913643
ENSMUSG00000042570	Mier2	0.913627
ENSMUSG00000039756	Dnttip2	0.913583
ENSMUSG00000042390	Gatad2b	0.913583
ENSMUSG00000028271	Gtf2b	0.913515
ENSMUSG00000020321	Mdh1	0.913406
ENSMUSG00000029814	Igf2bp3	0.913368
ENSMUSG00000043411	Usp48	0.913343
ENSMUSG00000086727	4931428L18Rik	0.913299
ENSMUSG00000022353	Mtss1	0.913283
ENSMUSG00000041219	Arhgap11a	0.913265
ENSMUSG00000041459	Tardbp	0.913211
ENSMUSG00000052752	Traf7	0.913186
ENSMUSG00000043987	Cep164	0.91313
ENSMUSG00000006732	Mettl1	0.91306
ENSMUSG00000028796	Phc2	0.913055
ENSMUSG00000073616	Myeov2	0.913039
ENSMUSG00000101342	Gm28078	0.913034
ENSMUSG00000022663	Atg3	0.912994
ENSMUSG00000020287	Mpg	0.912694
ENSMUSG00000032050	Rdx	0.912669
ENSMUSG00000032621	Srek1	0.912654
ENSMUSG00000022972	1110004E09Rik	0.912647
ENSMUSG00000023886	Smoc2	0.912641
ENSMUSG00000037475	Thoc2	0.912545
ENSMUSG00000032640	Chsy1	0.912455
ENSMUSG00000063935	Zar1	0.912435
ENSMUSG00000049999	Ppp1r3d	0.912413
ENSMUSG00000022673	Mcm4	0.912403
ENSMUSG00000027304	Rtf1	0.912282
ENSMUSG00000003134	Tbc1d8	0.912242
ENSMUSG00000022559	Fbxl6	0.912162
ENSMUSG00000040158	Tax1bp3	0.911925
ENSMUSG00000008958	Vps72	0.911924
ENSMUSG00000090216	Gm16549	0.911807
ENSMUSG00000034708	Grn	0.911784
ENSMUSG00000002635	Pdcd2l	0.911656
ENSMUSG00000083854	Dnajc19-ps	0.911605
ENSMUSG00000029681	Bcl7b	0.911596
ENSMUSG00000032187	Smarca4	0.911411
ENSMUSG00000040521	Tsfm	0.911409
ENSMUSG00000033209	Ttc28	0.911322
ENSMUSG00000061411	Nol4l	0.911285
ENSMUSG00000048334	Gm8258	0.911225
ENSMUSG00000028825	Rhd	0.91121
ENSMUSG00000000701	Tcl1b5	0.911164
ENSMUSG00000075312	Gm13597	0.911073
ENSMUSG00000034574	Daam1	0.911042
ENSMUSG00000067058	Rps15a-ps5	0.91104
ENSMUSG00000056487	Mettl7a2	0.910873
ENSMUSG00000026966	Ssna1	0.910529
ENSMUSG00000021037	Ahsa1	0.910492
ENSMUSG00000024218	Taf11	0.91037
ENSMUSG00000020888	Dvl2	0.910097
ENSMUSG00000028152	Tspan5	0.910088
ENSMUSG00000018974	Sart3	0.910064
ENSMUSG00000055817	Mta3	0.910062
ENSMUSG00000033955	Tnks1bp1	0.909953
ENSMUSG00000033444	Specc1l	0.909934
ENSMUSG00000026554	Dcaf8	0.909926
ENSMUSG00000040084	Bub1b	0.909835
ENSMUSG00000024104	Fam21	0.909775
ENSMUSG00000031105	Slc25a14	0.909754
ENSMUSG00000035325	Sec31a	0.909579
ENSMUSG00000070837	Aurkc	0.909559
ENSMUSG00000005514	Por	0.909465
ENSMUSG00000037280	Galnt6	0.909401
ENSMUSG00000020738	Sumo2	0.909267
ENSMUSG00000004947	Dtx2	0.909217
ENSMUSG00000041740	Rnf10	0.909067
ENSMUSG00000007891	Ctsd	0.909004
ENSMUSG00000020023	Tmcc3	0.908938
ENSMUSG00000081911	Mrps36-ps2	0.908862
ENSMUSG00000014859	E2f4	0.908543
ENSMUSG00000029063	Nadk	0.90851
ENSMUSG00000080772	Gm12543	0.908482
ENSMUSG00000014313	Cox6c	0.908437
ENSMUSG00000025241	Fyco1	0.908435
ENSMUSG00000020074	Ccar1	0.908278
ENSMUSG00000034659	Tmem109	0.90827
ENSMUSG00000066031	Gm13023	0.908249
ENSMUSG00000025269	Apex2	0.908229
ENSMUSG00000035139	Secisbp2	0.908102
ENSMUSG00000002767	Mrpl2	0.908093
ENSMUSG00000039835	Nhsl1	0.908077
ENSMUSG00000026889	Rbm18	0.907996
ENSMUSG00000036817	Sun1	0.90792
ENSMUSG00000060572	Mfap2	0.907919
ENSMUSG00000004100	Ppan	0.90786
ENSMUSG00000027566	Psma7	0.907858
ENSMUSG00000072889	Nfxl1	0.907832
ENSMUSG00000028402	Mpdz	0.907789
ENSMUSG00000014601	Strip1	0.907761
ENSMUSG00000039952	Dag1	0.907759
ENSMUSG00000018238	Gdf9	0.907542
ENSMUSG00000014959	Gorasp2	0.907538
ENSMUSG00000004952	Rasa4	0.907533
ENSMUSG00000033379	Atp6v0b	0.907451
ENSMUSG00000073676	Hspe1	0.907304
ENSMUSG00000040945	Rcc2	0.907236
ENSMUSG00000036186	Fam69b	0.907234
ENSMUSG00000038299	Wdr36	0.907228
ENSMUSG00000022983	Scaf4	0.907223
ENSMUSG00000009566	Fpgs	0.907218
ENSMUSG00000029095	Ablim2	0.907212
ENSMUSG00000023965	Fbxl17	0.907167
ENSMUSG00000026740	Dnajc1	0.907125
ENSMUSG00000020483	Dynll2	0.907055
ENSMUSG00000030084	Plxna1	0.907052
ENSMUSG00000006527	Sfmbt1	0.907031
ENSMUSG00000026932	Nacc2	0.907004
ENSMUSG00000021096	Ppm1a	0.906978
ENSMUSG00000036565	Ttyh3	0.906957
ENSMUSG00000020752	Recql5	0.906648
ENSMUSG00000003992	Ssbp2	0.90658
ENSMUSG00000000374	Trappc10	0.906563
ENSMUSG00000020451	Limk2	0.906542
ENSMUSG00000019868	Vta1	0.906537
ENSMUSG00000044167	Foxo1	0.906427
ENSMUSG00000023015	Racgap1	0.906396
ENSMUSG00000027433	Xrn2	0.906348
ENSMUSG00000024764	Naa40	0.906311
ENSMUSG00000052997	Uba2	0.906096
ENSMUSG00000090083	Rnf8	0.906072
ENSMUSG00000061136	Prpf40a	0.906063
ENSMUSG00000032897	Nfyc	0.906055
ENSMUSG00000035227	Spcs2	0.906022
ENSMUSG00000050966	Lin28a	0.905929
ENSMUSG00000024759	Atl3	0.905902
ENSMUSG00000032076	Cadm1	0.905698
ENSMUSG00000028890	Mtf1	0.905685
ENSMUSG00000022285	Ywhaz	0.905651
ENSMUSG00000024660	Incenp	0.905644
ENSMUSG00000083892	Gm1848	0.905635
ENSMUSG00000026933	Camsap1	0.905551
ENSMUSG00000036333	Kidins220	0.905494
ENSMUSG00000034354	Mtmr3	0.905467
ENSMUSG00000043623	4933412A08Rik	0.905388
ENSMUSG00000018334	Ksr1	0.905247
ENSMUSG00000002910	Arrdc2	0.905232
ENSMUSG00000021962	Dcp1a	0.905231
ENSMUSG00000032898	Fbxo21	0.905182
ENSMUSG00000022973	Synj1	0.905147
ENSMUSG00000048076	Arf1	0.905125
ENSMUSG00000057110	Cntrl	0.905112
ENSMUSG00000015653	Steap2	0.905008
ENSMUSG00000062732	Lypd4	0.904945
ENSMUSG00000091697	Eif3s6-ps2	0.904801
ENSMUSG00000019813	Cep57l1	0.9048
ENSMUSG00000022677	Fopnl	0.904787
ENSMUSG00000020448	Rnf185	0.904777
ENSMUSG00000028093	Acp6	0.904658
ENSMUSG00000070544	Top1	0.904637
ENSMUSG00000089824	Rbm12	0.904596
ENSMUSG00000006456	Rbm14	0.90459
ENSMUSG00000024853	Sf3b2	0.904528
ENSMUSG00000024487	Yipf5	0.904486
ENSMUSG00000070498	Tmem132b	0.904431
ENSMUSG00000005078	Jkamp	0.904309
ENSMUSG00000039218	Srrm2	0.904125
ENSMUSG00000037815	Ctnna1	0.904115
ENSMUSG00000030846	Tial1	0.904096
ENSMUSG00000028967	Errfi1	0.904062
ENSMUSG00000028820	Sfpq	0.904055
ENSMUSG00000041341	Atg2b	0.904008
ENSMUSG00000031756	Cenpn	0.903947
ENSMUSG00000031731	Ap1g1	0.903941
ENSMUSG00000021631	Mrps36-ps1	0.903884
ENSMUSG00000038215	Cep44	0.903849
ENSMUSG00000045104	Gm5514	0.903842
ENSMUSG00000030543	Mesp2	0.903631
ENSMUSG00000068940	Tcl1b3	0.903602
ENSMUSG00000028040	Efna4	0.903581
ENSMUSG00000053128	Rnf26	0.903488
ENSMUSG00000027074	Slc43a3	0.903346
ENSMUSG00000031917	Nip7	0.903305
ENSMUSG00000050608	Minos1	0.903258
ENSMUSG00000047963	Stbd1	0.903187
ENSMUSG00000001082	Mfsd10	0.903163
ENSMUSG00000066477	Gm16551	0.903097
ENSMUSG00000042148	Cox10	0.903044
ENSMUSG00000024456	Diap1	0.903003
ENSMUSG00000019066	Rab3d	0.902813
ENSMUSG00000049460	Gm8396	0.902783
ENSMUSG00000040935	Padi6	0.90274
ENSMUSG00000020706	Ftsj3	0.902732
ENSMUSG00000025613	Cct8	0.902676
ENSMUSG00000000214	Th	0.902637
ENSMUSG00000024387	Csnk2b	0.902602
ENSMUSG00000030876	Mettl9	0.902582
ENSMUSG00000008683	Rps15a	0.902555
ENSMUSG00000005370	Msh6	0.902546
ENSMUSG00000037210	Fam193a	0.902542
ENSMUSG00000035351	Nup37	0.902463
ENSMUSG00000028822	Tmem50a	0.902463
ENSMUSG00000064128	Cenpj	0.902428
ENSMUSG00000058159	T2	0.902349
ENSMUSG00000021974	Fgf9	0.902249
ENSMUSG00000020255	D10Wsu102e	0.902242
ENSMUSG00000071659	Hnrnpul2	0.902223
ENSMUSG00000018923	Med11	0.902153
ENSMUSG00000036241	Ube2r2	0.902133
ENSMUSG00000041837	Pdcd7	0.902046
ENSMUSG00000028614	Ndc1	0.902044
ENSMUSG00000027067	Ssrp1	0.902018
ENSMUSG00000009563	Tor2a	0.901939
ENSMUSG00000038812	Trmt112	0.901931
ENSMUSG00000059182	Skap2	0.901897
ENSMUSG00000037376	Trmt6	0.901893
ENSMUSG00000022257	Laptm4b	0.901892
ENSMUSG00000066149	Cdc26	0.901877
ENSMUSG00000071083	Gm10311	0.901848
ENSMUSG00000052566	Hook2	0.901843
ENSMUSG00000042308	Setd1a	0.901769
ENSMUSG00000038925	E330034G19Rik	0.901715
ENSMUSG00000074060	Fbxw15	0.901709
ENSMUSG00000032316	Clk3	0.901646
ENSMUSG00000026594	Ralgps2	0.901604
ENSMUSG00000022255	Mtdh	0.901586
ENSMUSG00000100347	Gm7895	0.901558
ENSMUSG00000022964	Tmem50b	0.90146
ENSMUSG00000031370	Zrsr2	0.901442
ENSMUSG00000025130	P4hb	0.901409
ENSMUSG00000037492	Zmat4	0.901393
ENSMUSG00000029403	Cdkl2	0.901351
ENSMUSG00000073176	Zfp449	0.901343
ENSMUSG00000054619	Mettl7a1	0.901316
ENSMUSG00000041765	Ubac2	0.901291
ENSMUSG00000014633	Cmc2	0.901202
ENSMUSG00000038502	Ptov1	0.901178
ENSMUSG00000055044	Pdlim1	0.901134
ENSMUSG00000020079	Supv3l1	0.901124
ENSMUSG00000022940	Pigp	0.900988
ENSMUSG00000058230	Arhgap35	0.900965
ENSMUSG00000021484	Lman2	0.900945
ENSMUSG00000042185	Nfrkb	0.90093
ENSMUSG00000030905	Crym	0.900795
ENSMUSG00000002109	Ddb2	0.900704
ENSMUSG00000020108	Ddit4	0.900668
ENSMUSG00000020271	Fbxw11	0.900546
ENSMUSG00000079111	Kdelr2	0.900473
ENSMUSG00000029423	Piwil1	0.900445
ENSMUSG00000005846	Rsl1d1	0.900352
ENSMUSG00000071645	Tut1	0.900294
ENSMUSG00000035086	Becn1	0.900201
ENSMUSG00000041144	Dnah7b	0.900191
ENSMUSG00000036158	Prickle1	0.900154
ENSMUSG00000017221	Psmd3	0.90012
ENSMUSG00000070738	Dgkd	0.900113
ENSMUSG00000024400	Wdr33	0.9
ENSMUSG00000013707	Tnfaip8l2	-0.900032
ENSMUSG00000051890	Klhdc1	-0.900253
ENSMUSG00000025880	Smad7	-0.9003
ENSMUSG00000033855	Ston1	-0.900322
ENSMUSG00000081593	Gm11841	-0.900528
ENSMUSG00000094237	AF067063	-0.900671
ENSMUSG00000028559	Osbpl9	-0.900704
ENSMUSG00000030200	Bcl2l14	-0.900723
ENSMUSG00000005958	Ephb3	-0.900747
ENSMUSG00000015357	Clpx	-0.900851
ENSMUSG00000066705	Fxyd6	-0.900988
ENSMUSG00000069114	Zbtb10	-0.901198
ENSMUSG00000074804	AU015228	-0.901205
ENSMUSG00000022114	Spry2	-0.901234
ENSMUSG00000042677	Zc3h12a	-0.901369
ENSMUSG00000078537	B020031M17Rik	-0.901587
ENSMUSG00000089716	Gm6264	-0.901595
ENSMUSG00000030127	Cops7a	-0.901654
ENSMUSG00000073409	H2-Q6	-0.901656
ENSMUSG00000004591	Pkn2	-0.902352
ENSMUSG00000069495	Epc2	-0.902466
ENSMUSG00000029338	Antxr2	-0.902656
ENSMUSG00000029050	Ski	-0.902737
ENSMUSG00000094219	Calhm3	-0.903314
ENSMUSG00000027420	Bfsp1	-0.903392
ENSMUSG00000094635	Gm7104	-0.903571
ENSMUSG00000095071	AF067061	-0.903635
ENSMUSG00000078511	Pramef25	-0.903708
ENSMUSG00000041037	Irgq	-0.903787
ENSMUSG00000062284	Gm6030	-0.90404
ENSMUSG00000074607	Tox2	-0.904109
ENSMUSG00000089893	Gm9141	-0.904451
ENSMUSG00000096049	Gm2075	-0.904482
ENSMUSG00000037028	Gm12800	-0.904851
ENSMUSG00000046058	Eid2	-0.904924
ENSMUSG00000046957	Spz1	-0.905097
ENSMUSG00000054967	Zfp647	-0.905164
ENSMUSG00000025511	Tspan4	-0.905593
ENSMUSG00000024976	Shoc2	-0.905699
ENSMUSG00000005204	Senp3	-0.905752
ENSMUSG00000067889	Sptbn2	-0.905913
ENSMUSG00000034765	Dusp5	-0.906031
ENSMUSG00000038886	Man2a2	-0.906129
ENSMUSG00000063846	Gm21731	-0.90622
ENSMUSG00000053470	Kdm3a	-0.906665
ENSMUSG00000094278	Gm12626	-0.907348
ENSMUSG00000095822	Gm9117	-0.907487
ENSMUSG00000051185	Fam174a	-0.907616
ENSMUSG00000084349	Rpl3-ps1	-0.907698
ENSMUSG00000015759	Cnih1	-0.907912
ENSMUSG00000047388	Atmin	-0.908062
ENSMUSG00000054272	Zscan4c	-0.908075
ENSMUSG00000023940	Sgol1	-0.908524
ENSMUSG00000023906	Cldn6	-0.908652
ENSMUSG00000094649	Gm7102	-0.909139
ENSMUSG00000026037	Orc2	-0.909204
ENSMUSG00000054727	1700013H16Rik	-0.909291
ENSMUSG00000067017	Gm3608	-0.90995
ENSMUSG00000054263	Lifr	-0.910056
ENSMUSG00000037316	Bag4	-0.910148
ENSMUSG00000049791	Fzd4	-0.910166
ENSMUSG00000053964	Lgals4	-0.910265
ENSMUSG00000040818	Dennd6a	-0.910419
ENSMUSG00000060181	Slc35e3	-0.910629
ENSMUSG00000022178	Ajuba	-0.910679
ENSMUSG00000020541	Tom1l1	-0.910817
ENSMUSG00000070828	Zscan4f	-0.910864
ENSMUSG00000086598	Btbd18	-0.910945
ENSMUSG00000060992	Copz1	-0.911117
ENSMUSG00000062794	Zfp599	-0.911182
ENSMUSG00000040413	Timd2	-0.911318
ENSMUSG00000014905	Dnajb9	-0.911368
ENSMUSG00000052253	Zfp622	-0.911469
ENSMUSG00000000561	Wdr77	-0.911533
ENSMUSG00000074794	Arrdc3	-0.911889
ENSMUSG00000037253	Mex3c	-0.91193
ENSMUSG00000079162	Trim43b	-0.911966
ENSMUSG00000026986	Hnmt	-0.911994
ENSMUSG00000084273	Gm12628	-0.912027
ENSMUSG00000084123	Gm13106	-0.912099
ENSMUSG00000070618	BC080695	-0.912225
ENSMUSG00000058976	Usp17lc	-0.912422
ENSMUSG00000074365	Crxos	-0.912503
ENSMUSG00000072387	Gm10356	-0.912538
ENSMUSG00000055692	Tmem191c	-0.912824
ENSMUSG00000093978	Gm12612	-0.91286
ENSMUSG00000067297	Ifit1bl2	-0.913285
ENSMUSG00000027225	Duoxa2	-0.913516
ENSMUSG00000048878	Hexim1	-0.913526
ENSMUSG00000041870	Ankrd13a	-0.913569
ENSMUSG00000081249	Gm11517	-0.913656
ENSMUSG00000047139	Cd24a	-0.9141
ENSMUSG00000095057	Zfp353-ps	-0.914236
ENSMUSG00000082308	Gm15770	-0.914572
ENSMUSG00000045180	Shroom2	-0.914693
ENSMUSG00000070902	Zfp352	-0.914903
ENSMUSG00000037071	Scd1	-0.915103
ENSMUSG00000092576	Obox4-ps35	-0.915372
ENSMUSG00000025838	Pramel6	-0.915428
ENSMUSG00000101076	Gm4545	-0.915504
ENSMUSG00000036764	Dnajc12	-0.91558
ENSMUSG00000075701	Vimp	-0.915938
ENSMUSG00000064194	Zfp936	-0.915953
ENSMUSG00000039936	Pik3cd	-0.915991
ENSMUSG00000101436	Gm5157	-0.916316
ENSMUSG00000034957	Cebpa	-0.916383
ENSMUSG00000037742	Eef1a1	-0.916513
ENSMUSG00000094328	Gm9125	-0.916514
ENSMUSG00000024640	Psat1	-0.916519
ENSMUSG00000025869	Nop16	-0.917319
ENSMUSG00000089689	Gm4982	-0.917371
ENSMUSG00000075610	Tmem92	-0.917429
ENSMUSG00000028172	Tacr3	-0.917441
ENSMUSG00000006056	Calcoco2	-0.91746
ENSMUSG00000022905	Kpna1	-0.917466
ENSMUSG00000081586	Gm11544	-0.917523
ENSMUSG00000025764	Jade1	-0.917594
ENSMUSG00000046192	Iqub	-0.917746
ENSMUSG00000071217	Gm2022	-0.917779
ENSMUSG00000029923	Rab19	-0.91801
ENSMUSG00000034552	Zswim2	-0.91822
ENSMUSG00000025839	Pramel7	-0.918282
ENSMUSG00000024232	Bambi	-0.918388
ENSMUSG00000030629	Zfand6	-0.918531
ENSMUSG00000031578	Mak16	-0.918626
ENSMUSG00000101722	Gm29125	-0.918909
ENSMUSG00000085403	Gm13068	-0.919086
ENSMUSG00000103406	Gm5541	-0.919174
ENSMUSG00000097581	Gm21936	-0.919211
ENSMUSG00000022295	Atp6v1c1	-0.919313
ENSMUSG00000070890	Gm12794	-0.919319
ENSMUSG00000100592	Gm28645	-0.919435
ENSMUSG00000028463	Car9	-0.919496
ENSMUSG00000096879	Gm4858	-0.919509
ENSMUSG00000041598	Cdc42ep4	-0.91973
ENSMUSG00000020300	Cpeb4	-0.920401
ENSMUSG00000035310	Lin54	-0.920834
ENSMUSG00000058005	Tdpoz3	-0.920984
ENSMUSG00000024391	Apom	-0.921008
ENSMUSG00000095514	D13Ertd608e	-0.921109
ENSMUSG00000085939	Cd63-ps	-0.921337
ENSMUSG00000094311	Rfpl4b	-0.92166
ENSMUSG00000079966	Gm14058	-0.921939
ENSMUSG00000090854	Gm4340	-0.922126
ENSMUSG00000090693	Trim43a	-0.922694
ENSMUSG00000043467	Zbtb37	-0.922918
ENSMUSG00000032387	Rbpms2	-0.923037
ENSMUSG00000021930	Spryd7	-0.923057
ENSMUSG00000059498	Fcgr3	-0.923156
ENSMUSG00000053208	Kat2b-ps	-0.923552
ENSMUSG00000023047	Amhr2	-0.923579
ENSMUSG00000001827	Folr1	-0.923636
ENSMUSG00000098010	Gm21542	-0.923648
ENSMUSG00000039748	Exo1	-0.92377
ENSMUSG00000084034	Gm12617	-0.924062
ENSMUSG00000026094	Stk17b	-0.924344
ENSMUSG00000096144	B020004C17Rik	-0.924385
ENSMUSG00000030559	Rab38	-0.92502
ENSMUSG00000034088	Hdlbp	-0.926263
ENSMUSG00000056201	Cfl1	-0.92631
ENSMUSG00000024472	Dcp2	-0.926365
ENSMUSG00000099623	Gm4526	-0.92645
ENSMUSG00000066772	Obox3	-0.926559
ENSMUSG00000032788	Pdxk	-0.926705
ENSMUSG00000083227	Gm11546	-0.926758
ENSMUSG00000025935	Tram1	-0.927023
ENSMUSG00000095680	Gm12627	-0.927185
ENSMUSG00000037487	Ubr5	-0.92728
ENSMUSG00000096175	Gm21761	-0.927354
ENSMUSG00000023982	Guca1a	-0.927411
ENSMUSG00000047804	Akap10	-0.928301
ENSMUSG00000030847	Bag3	-0.928483
ENSMUSG00000081402	Gm15455	-0.928504
ENSMUSG00000072905	Gm2016	-0.928824
ENSMUSG00000092019	Gm4027	-0.928956
ENSMUSG00000028668	Tceb3	-0.92909
ENSMUSG00000026821	Ralgds	-0.929376
ENSMUSG00000011263	Exoc3l2	-0.929621
ENSMUSG00000032715	Trib3	-0.929901
ENSMUSG00000074501	Gm5612	-0.93005
ENSMUSG00000078625	Gm12789	-0.930207
ENSMUSG00000036815	Dpp10	-0.930212
ENSMUSG00000043522	A430060F13Rik	-0.93032
ENSMUSG00000060256	Tdpoz4	-0.930997
ENSMUSG00000055546	Timd4	-0.931152
ENSMUSG00000074424	Gm10696	-0.932878
ENSMUSG00000018001	Cyth3	-0.933204
ENSMUSG00000083246	Gm11839	-0.934278
ENSMUSG00000034917	Tjp3	-0.934644
ENSMUSG00000017400	Stac2	-0.934659
ENSMUSG00000049916	2610318N02Rik	-0.935311
ENSMUSG00000079030	Gm2046	-0.935893
ENSMUSG00000104460	Gm9121	-0.936504
ENSMUSG00000026107	Nabp1	-0.939034
ENSMUSG00000079034	Gm8300	-0.93918
ENSMUSG00000079029	Gm5662	-0.940865
ENSMUSG00000102311	Gm5543	-0.941629
ENSMUSG00000042396	Rbm7	-0.942637
ENSMUSG00000074502	Ubtfl1	-0.942832
ENSMUSG00000044636	Csrnp2	-0.953399
