# Supplementary material for: Stella modulates transcriptional and endogenous retrovirus programs during maternal-to-zygotic transition
Source: eLife journal article supplement (doi:10.7554/elife.22345), 2017-03-21
Supplement: supp [file elife-22345-supp-v1.zip › elife_poa_e22345_Figure_3_source_data_1.xlsx]

## Sheet: Uniquely mapped TE counts
Figure 3 – source data 1. Uniquely mapped transposable element (TE) counts. TE counts for 66 samples from single cell / embryo RNA-seq experiments. Uniquely mapped reads only.
	WT_oocyte_1	WT_oocyte_2	WT_oocyte_3	WT_oocyte_4	WT_oocyte_5	WT_oocyte_6	WT_oocyte_7	WT_oocyte_8	WT_oocyte_9	WT_oocyte_10	WT_oocyte_11	WT_oocyte_12	KO_oocyte_1	KO_oocyte_2	KO_oocyte_3	KO_oocyte_4	KO_oocyte_5	KO_oocyte_6	KO_oocyte_7	KO_oocyte_8	KO_oocyte_9	KO_oocyte_10	KO_oocyte_11	KO_oocyte_12	WT_1_cell_1	WT_1_cell_2	WT_1_cell_3	WT_1_cell_4	WT_1_cell_5	WT_1_cell_6	WT_1_cell_7	WT_1_cell_8	WT_1_cell_9	WT_1_cell_10	WT_1_cell_11	WT_1_cell_12	KO_1_cell_1	KO_1_cell_2	KO_1_cell_3	KO_1_cell_4	KO_1_cell_5	KO_1_cell_6	KO_1_cell_7	KO_1_cell_8	KO_1_cell_9	KO_1_cell_10	KO_1_cell_11	KO_1_cell_12	WT_2_cell_1
(A)n	2817	3796	2696	2233	1948	1637	1970	3028	1590	2861	3447	3995	4406	2022	3551	2540	3571	2750	3461	3982	2749	3148	2830	4697	2704	3089	2337	1843	2868	2634	3008	3880	2279	2557	3368	2514	2453	1562	1253	2527	1962	4338	3895	4870	3687	4310	5015	4260	1563
(AAATG)n	0	0	0	0	0	0	0	0	0	0	0	0	0	0	0	0	0	0	0	1	0	1	0	0	0	0	0	0	0	0	0	0	0	0	0	0	0	0	0	0	1	0	0	0	0	0	0	0	0
(AACTG)n	1	0	0	0	1	0	0	0	1	0	0	0	0	0	4	0	0	0	0	0	0	0	2	0	0	0	0	0	0	0	0	0	0	0	0	0	1	0	0	2	0	1	0	2	1	5	0	0	1
(AATAG)n	1	1	0	0	0	0	0	0	0	0	0	0	0	0	0	0	0	0	1	1	3	0	1	0	0	0	1	0	0	0	0	1	0	0	1	0	1	1	0	1	0	1	1	1	0	2	2	2	0
(AATTG)n	0	0	0	0	0	0	0	0	0	0	0	0	0	0	0	0	0	0	0	0	0	0	0	0	0	0	0	0	0	0	0	0	0	0	0	0	0	0	0	0	0	0	0	0	0	0	0	0	0
(ACATG)n	0	0	0	0	0	1	0	0	0	0	0	0	0	0	0	3	0	2	0	0	0	0	0	0	0	0	0	0	0	0	0	0	0	0	0	0	0	0	0	0	0	0	0	0	0	0	0	0	0
(ACCG)n	0	6	4	1	3	1	1	5	1	3	2	1	4	12	0	2	3	2	2	0	1	0	1	4	1	1	2	2	0	0	1	3	0	0	2	3	1	0	0	1	1	7	1	0	3	1	1	1	12
(ACCTG)n	0	0	0	0	0	0	0	0	0	0	0	0	0	0	0	1	0	0	0	0	0	0	0	0	0	0	0	0	0	0	0	0	0	0	0	0	0	0	0	0	0	0	0	0	0	0	0	1	0
(ACGTG)n	0	0	0	0	0	0	0	0	0	0	0	0	0	0	0	0	0	0	0	0	0	0	0	0	0	0	0	0	0	0	0	0	0	0	0	0	0	0	0	0	0	0	0	0	0	0	0	0	0
(ACTG)n	2	2	6	5	1	1	1	0	5	2	3	3	6	3	10	7	4	8	5	4	4	2	3	6	1	1	8	2	5	5	3	4	2	1	5	3	3	4	1	1	3	10	5	3	4	11	2	7	4
(AGATG)n	0	0	0	0	0	0	0	0	0	0	0	0	0	0	0	0	1	1	0	0	0	0	0	0	0	0	1	0	0	0	0	0	0	0	0	0	0	0	0	0	0	0	0	1	0	0	0	0	0
(AGCTG)n	39	132	55	30	28	43	27	34	43	62	47	29	100	13	60	35	42	48	57	49	38	27	20	37	30	103	72	27	44	36	17	56	37	36	75	47	32	18	23	40	7	52	28	59	28	86	134	101	31
(AGGGGG)n	25	38	42	45	34	27	16	35	19	41	50	83	68	36	42	47	54	45	42	34	36	41	31	73	22	25	16	15	24	45	29	22	28	12	22	13	27	17	14	20	18	34	27	27	36	47	37	44	9
(AGGTG)n	0	0	0	0	0	0	0	1	0	0	0	0	0	0	0	0	0	0	0	0	0	0	0	0	0	0	0	0	0	0	0	0	0	0	0	0	0	0	0	0	0	0	0	0	0	0	0	0	4
(AGTAG)n	0	0	0	0	0	0	0	0	0	0	0	0	0	0	0	0	0	1	0	0	0	0	0	0	0	0	0	0	0	0	0	0	0	0	0	0	0	0	0	0	0	0	0	0	0	0	0	0	0
(AGTTG)n	0	0	0	0	0	0	0	0	0	0	0	0	0	0	0	0	0	0	0	0	0	0	0	0	0	0	0	0	0	0	0	0	0	0	0	0	0	0	0	0	0	0	0	0	0	0	0	0	0
(ATAAG)n	0	0	0	0	0	0	0	0	4	0	1	0	0	0	0	0	0	0	0	0	0	0	1	0	0	0	0	0	0	2	0	0	0	1	0	4	0	0	0	0	0	0	0	0	0	0	0	0	0
(ATAGG)n	0	0	0	0	0	0	0	0	0	0	0	0	0	0	0	0	0	0	0	0	0	0	0	0	0	0	0	0	0	0	0	0	0	0	0	0	0	0	0	0	0	0	0	0	0	0	0	1	0
(ATATG)n	0	6	0	0	0	3	0	1	1	2	0	1	5	1	2	0	1	2	1	2	0	0	1	2	3	2	1	0	1	1	0	1	1	0	2	1	1	1	0	0	1	3	2	1	3	0	2	0	4
(ATCTG)n	0	0	0	0	0	0	0	0	0	0	0	0	0	0	0	0	0	1	0	0	0	0	0	0	0	0	0	0	0	0	0	0	0	0	0	0	0	0	0	0	0	0	0	0	0	0	0	0	0
(ATG)n	1355	1680	1378	1560	1402	933	1045	1453	1144	1522	1604	1644	2283	1173	1798	1561	1968	1526	1707	1912	1765	1559	1455	2539	1784	1963	1559	1315	1469	1504	1236	1247	1386	852	1442	1162	1659	924	797	1380	1474	2518	1794	1948	1781	2124	1613	2089	1105
(ATGGTG)n	313	370	300	319	196	210	261	302	200	268	285	337	421	201	360	327	338	336	388	348	341	304	277	541	436	499	385	270	441	283	275	311	275	192	316	252	363	223	206	343	392	607	431	404	330	460	389	360	190
(ATGTG)n	0	5	1	4	0	0	0	0	0	1	0	2	0	0	0	1	2	1	2	0	0	0	0	1	0	1	5	0	0	1	0	0	1	0	0	0	1	0	0	0	0	2	2	2	0	0	0	0	0
(ATTAG)n	0	0	0	0	0	0	0	0	0	0	0	0	0	0	0	0	1	0	0	0	0	0	0	0	0	0	0	0	0	0	0	0	0	0	0	0	0	0	0	0	0	0	0	0	0	0	0	0	0
(ATTG)n	19	29	24	33	51	12	16	22	22	35	33	36	63	32	50	43	52	47	50	53	43	20	34	54	25	48	35	30	35	23	32	30	28	19	36	36	25	18	10	28	27	41	36	43	28	47	71	48	12
(ATTTG)n	0	0	0	1	1	1	0	1	0	1	5	0	1	0	1	1	2	2	3	3	0	1	4	5	0	1	1	0	2	3	2	0	0	0	0	0	0	0	0	1	0	0	1	1	2	2	3	1	4
(C)n	4	11	12	4	10	2	5	5	8	4	6	8	8	5	7	9	7	8	3	11	5	2	2	13	3	9	8	5	4	8	2	5	4	4	13	2	13	5	5	5	5	13	13	10	5	14	11	10	1
(CA)n	6379	7715	6444	7686	6725	3370	5191	5801	4559	6599	7477	9245	10950	6004	8491	7178	9369	8440	7617	8954	6589	6612	6029	11091	6296	7296	5727	5271	7030	5892	6143	5500	5405	3208	5768	4420	5632	4171	2839	5041	5183	8421	6447	7296	6651	7231	7206	7880	3993
(CAA)n	410	481	599	415	452	275	353	390	327	528	621	777	1045	612	953	773	916	900	900	749	719	696	555	931	350	484	362	297	348	396	367	383	340	236	406	295	486	330	250	357	521	848	573	511	555	582	726	864	529
(CAAA)n	880	1003	963	907	779	543	727	748	595	988	1156	1274	1816	863	1621	1183	1687	1436	1681	1401	1154	1141	1009	1620	752	973	792	677	803	872	704	774	659	473	886	556	782	522	471	745	805	1413	1104	1127	992	1215	1289	1345	614
(CAAAA)n	1784	1828	1576	1801	1562	848	1234	1374	1043	1652	2052	2705	2971	1679	2302	1765	2522	2046	2351	2487	1715	1918	1683	2811	1476	1688	1315	1279	1767	1596	1498	1362	1299	805	1445	984	1398	1087	775	1228	1435	2246	1609	1851	1657	1818	1879	2254	858
(CAAAAA)n	1414	1541	1250	1412	1320	576	913	1111	775	1272	1739	2154	2366	1425	2103	1424	2017	1626	1760	1799	1222	1250	1142	2115	1110	1089	909	1005	1299	1160	1119	1047	1020	634	1054	865	983	707	472	875	1016	1536	1149	1345	1280	1391	1295	1515	853
(CAAAC)n	2829	2905	1925	3285	2819	1066	1782	2175	1600	2864	3992	4311	4496	2314	4353	2937	4300	3172	3322	3926	2042	2251	2301	3861	2488	2670	1970	2227	3689	2259	2743	2185	2519	1271	2033	1955	1922	1497	800	1417	1568	2371	2234	2447	2174	2188	2191	3079	402
(CAAAG)n	3	3	1	1	3	6	2	3	2	3	2	6	5	1	4	6	11	8	4	8	6	6	3	12	2	5	1	0	3	3	0	4	2	1	3	1	0	1	2	4	3	10	2	5	5	3	3	1	6
(CAAAT)n	2	2	3	3	4	5	3	2	5	3	7	2	10	1	3	5	3	6	13	1	2	3	6	9	4	9	8	2	6	4	5	5	6	1	3	2	3	3	1	10	14	26	18	6	8	5	9	10	7
(CAACC)n	13	11	5	35	11	4	18	14	17	15	23	16	22	18	16	11	20	10	12	17	15	12	13	17	32	43	37	19	23	25	19	24	25	3	24	16	16	12	10	15	16	49	35	32	21	20	18	27	52
(CAACG)n	6	6	4	3	4	5	6	3	4	3	4	8	0	3	5	5	4	3	7	4	9	12	5	8	6	10	6	3	3	15	6	9	3	2	2	7	14	4	1	7	17	29	15	15	14	9	7	7	0
(CAACT)n	0	0	3	2	0	0	0	0	0	0	0	1	0	0	0	0	0	0	0	0	0	0	0	1	0	0	0	0	1	1	0	0	1	0	0	0	0	0	0	0	0	1	0	0	2	0	0	0	0
(CAAG)n	3	13	5	4	3	7	4	8	8	10	2	7	8	7	2	6	15	6	1	10	10	10	2	13	8	4	7	1	4	2	3	2	5	5	3	2	4	1	3	4	2	13	9	4	4	13	8	8	17
(CAAGA)n	0	0	0	0	0	0	0	0	0	0	0	0	0	0	0	0	1	0	0	0	0	0	0	0	0	0	0	0	0	0	0	0	0	0	0	0	0	0	0	0	1	0	0	0	0	0	0	0	0
(CAAGC)n	0	0	0	0	0	0	0	0	0	0	0	0	0	0	0	0	1	0	0	0	0	0	0	0	0	1	0	0	0	0	0	0	0	0	0	0	0	0	0	0	0	0	0	0	0	0	0	0	0
(CAAGG)n	0	0	0	0	0	0	0	0	0	0	0	1	0	1	0	0	0	1	0	0	0	0	0	0	0	0	0	0	0	0	0	0	0	0	0	0	0	0	0	0	1	0	0	0	0	0	0	1	0
(CAAT)n	483	659	590	576	566	315	441	485	408	481	560	795	715	477	632	565	550	701	396	613	565	612	497	896	501	436	394	434	487	338	491	238	326	194	244	297	450	303	302	341	494	737	525	550	577	668	434	432	82
(CAATA)n	29	2	4	9	4	4	12	22	8	19	16	12	6	14	14	4	15	15	20	22	6	16	16	19	3	6	3	2	10	18	7	4	4	2	5	4	8	11	0	3	1	12	5	4	4	15	14	12	2
(CAATC)n	0	0	0	0	0	0	0	0	1	0	0	0	0	0	0	0	0	0	0	0	0	0	0	0	0	0	0	0	0	0	0	0	1	0	0	0	0	0	0	0	0	0	1	0	0	0	0	0	0
(CAATG)n	0	0	0	0	0	0	0	0	0	0	0	0	0	0	0	0	0	0	0	0	0	0	0	0	0	0	0	0	0	0	0	0	0	0	0	0	0	0	0	0	0	0	0	0	0	0	0	0	0
(CAATT)n	0	0	0	0	0	0	0	0	0	0	0	0	0	0	0	0	0	0	0	0	0	0	0	0	0	0	0	0	0	0	1	0	0	0	0	0	0	0	1	0	0	1	0	0	0	0	0	0	0
(CACAA)n	1	5	2	2	1	2	5	3	3	2	0	1	11	4	6	3	8	6	6	0	5	4	1	4	5	5	2	3	2	0	3	4	1	1	1	0	2	3	0	2	3	1	0	0	0	6	7	5	0
(CACAC)n	0	0	0	1	2	0	0	0	1	0	0	0	0	0	0	0	2	3	0	0	0	0	0	1	0	0	0	0	0	0	0	1	0	0	0	0	0	0	0	2	0	0	0	1	0	0	0	3	1
(CACAG)n	176	235	136	175	191	126	189	223	181	204	202	198	202	109	131	121	146	114	109	254	221	165	167	263	346	336	348	245	303	192	266	206	171	121	226	157	232	167	135	232	258	347	293	312	219	304	277	269	99
(CACAT)n	1	0	0	0	1	2	0	2	0	4	1	4	0	0	1	2	2	2	0	0	1	0	0	0	3	3	1	1	1	0	0	1	1	0	3	2	1	1	0	2	0	4	0	1	3	1	1	3	8
(CACCAT)n	10	33	51	20	31	19	14	32	16	33	25	45	23	27	19	36	31	43	33	32	35	35	10	44	20	39	29	13	19	14	29	9	24	12	22	26	24	16	15	38	38	48	43	41	28	43	29	58	107
(CACCC)n	80	105	95	103	137	63	99	75	63	101	118	139	126	77	148	100	152	149	112	140	110	104	89	145	122	95	96	114	118	84	107	75	62	48	77	71	105	94	73	91	88	145	124	148	117	117	87	116	50
(CACCT)n	0	0	0	0	0	0	0	0	0	0	0	0	0	0	0	0	0	4	0	0	0	0	0	0	0	0	0	1	1	0	0	0	0	0	0	0	0	0	1	1	0	0	0	0	0	0	0	1	0
(CACG)n	86	92	128	94	96	72	51	74	53	87	109	157	138	66	110	115	134	154	146	151	138	115	91	160	103	124	80	115	131	104	98	100	67	50	95	58	74	82	62	123	191	229	144	165	123	121	123	133	74
(CACGC)n	0	0	0	0	3	3	0	0	0	0	0	0	0	0	0	0	0	0	1	0	6	0	3	3	0	0	1	0	0	0	0	2	0	0	0	4	4	0	1	0	4	3	3	0	0	0	6	3	12
(CACGT)n	0	0	0	0	0	0	0	0	0	0	0	0	0	0	0	0	0	1	0	0	0	0	0	0	0	0	0	0	0	0	0	0	0	0	0	0	0	0	0	0	0	0	0	0	0	0	0	0	0
(CACTA)n	0	1	0	0	0	2	1	0	0	0	3	2	1	0	0	4	5	0	0	5	0	0	0	0	1	2	0	0	1	0	3	3	0	0	2	3	0	0	1	0	4	0	0	0	3	0	1	0	0
(CACTC)n	0	0	0	0	0	0	0	0	0	0	0	3	0	0	0	0	0	0	0	0	0	0	0	0	0	0	0	0	0	0	0	0	0	0	0	0	0	0	0	0	0	1	0	0	0	0	0	0	0
(CACTG)n	84	100	63	114	83	56	85	75	58	78	90	104	97	53	114	78	82	98	90	131	112	86	104	181	153	127	127	92	136	72	138	69	83	45	90	55	117	89	63	82	110	148	123	146	120	94	112	145	38
(CAG)n	7436	8879	7226	10560	6815	3690	5315	5341	4713	6589	6447	7818	10358	9045	12294	8504	10642	12028	7088	10838	7729	7234	7588	14730	5910	6457	5499	4850	7459	3418	7692	3973	4458	2883	3650	3575	6402	5863	2614	5219	5032	8963	6604	9020	7645	7500	6612	9624	4247
(CAGA)n	677	691	795	592	561	371	399	559	410	545	599	1203	1004	658	918	706	965	830	811	695	805	848	631	1070	289	403	275	294	270	427	410	447	346	267	444	302	423	283	313	523	412	825	580	414	658	636	643	717	244
(CAGAA)n	4	2	12	6	17	9	8	3	1	5	7	28	12	14	9	17	27	13	24	23	28	25	22	15	1	7	3	8	3	14	6	6	2	1	3	2	0	6	1	8	11	21	21	8	7	5	10	28	3
(CAGAC)n	1	1	1	0	0	3	0	0	1	0	0	0	0	0	1	0	1	0	2	0	0	0	0	0	0	3	0	0	0	0	0	0	0	0	0	0	1	0	1	0	0	1	0	0	0	1	3	1	3
(CAGAG)n	0	0	0	0	0	0	0	0	0	1	0	0	0	0	0	0	0	1	0	0	0	0	0	1	0	0	0	0	0	0	0	0	0	0	0	0	0	0	0	0	1	0	0	2	0	0	0	2	0
(CAGAGA)n	477	609	696	565	530	297	422	598	440	659	671	930	884	555	789	683	697	815	766	754	857	541	498	962	502	802	671	448	556	493	470	567	531	365	704	498	654	339	375	775	493	1090	834	740	658	918	980	1002	396
(CAGAT)n	0	0	0	0	0	0	0	0	0	1	0	0	0	0	4	0	0	0	1	0	2	1	0	0	0	0	1	0	0	0	0	0	0	0	0	0	0	0	0	0	1	0	0	0	0	0	1	1	2
(CAGC)n	58	76	41	47	57	36	84	75	55	111	97	169	146	41	91	59	119	67	91	123	75	56	59	114	72	73	70	63	61	59	59	75	61	41	50	78	72	42	76	65	65	82	82	77	71	73	117	84	16
(CAGCC)n	5	2	6	2	10	0	4	7	5	1	4	13	8	3	10	7	3	10	0	5	3	4	3	11	2	9	8	3	4	1	8	13	4	4	7	2	5	4	3	3	6	6	2	5	7	6	10	4	6
(CAGCG)n	0	0	0	0	0	0	0	0	0	0	0	0	0	0	0	0	0	0	0	0	0	0	0	0	0	0	0	0	0	0	0	0	0	0	0	0	0	0	0	0	0	0	0	0	0	0	0	0	0
(CAGCT)n	0	0	0	2	0	1	0	1	0	0	1	2	6	0	0	2	0	2	0	0	0	0	0	0	0	2	0	0	0	0	0	0	0	1	0	0	0	0	0	0	0	0	0	2	0	0	0	1	0
(CAGG)n	186	165	194	191	141	99	144	110	97	188	203	270	264	182	239	248	273	221	257	303	187	175	199	275	133	150	130	118	189	133	159	135	133	65	142	88	161	117	55	131	170	186	141	179	152	136	139	173	124
(CAGGA)n	0	1	1	0	1	2	0	0	1	0	1	1	6	2	3	0	6	3	0	0	0	1	0	1	0	1	0	0	0	2	0	0	0	0	1	0	0	0	0	1	1	0	1	1	1	0	1	0	2
(CAGGC)n	0	1	5	1	0	1	3	0	2	2	0	0	2	1	2	0	1	2	0	1	0	0	1	1	0	1	1	0	1	0	2	2	3	0	3	0	0	1	3	1	1	2	2	1	0	1	5	1	4
(CAGGG)n	699	667	345	459	474	194	454	527	363	512	471	600	630	335	428	421	449	277	278	475	441	455	487	910	793	786	532	721	880	680	674	473	474	352	362	346	808	476	340	475	756	907	825	794	666	771	606	782	377
(CAGGT)n	0	0	0	0	0	0	0	0	0	0	0	0	0	0	0	0	0	0	0	0	0	0	0	0	0	0	0	0	0	0	0	0	0	0	0	0	0	0	0	0	0	0	0	0	0	0	0	1	0
(CAGT)n	4	2	3	7	7	6	2	7	4	6	7	7	5	3	2	6	6	7	2	3	8	6	5	6	6	11	14	1	4	8	5	6	4	4	11	8	2	2	1	5	3	6	6	7	5	8	9	7	2
(CAGTA)n	18	10	17	8	7	5	7	12	7	13	3	9	8	19	9	17	9	18	10	6	11	19	9	22	6	6	0	4	3	4	6	10	2	4	4	3	2	4	0	4	4	8	4	3	14	6	7	16	8
(CAGTC)n	0	0	0	0	0	0	0	0	0	0	0	0	0	0	0	0	0	0	0	0	0	0	0	0	0	0	0	0	0	0	0	0	0	0	0	0	0	0	0	0	0	0	0	0	0	0	0	0	0
(CAGTG)n	30	23	4	29	25	12	19	19	11	25	37	61	32	10	21	24	17	27	14	24	16	32	17	30	18	22	11	24	22	25	20	14	22	4	10	16	15	12	7	7	14	21	22	25	27	15	15	27	0
(CAGTT)n	0	0	0	0	0	0	0	0	0	0	0	0	0	0	0	0	1	0	0	0	0	2	0	0	0	1	0	0	0	0	0	0	0	0	2	0	0	0	0	0	0	0	0	0	0	0	0	0	0
(CAT)n	1361	1672	1330	1435	1165	906	1109	1608	1201	1684	1501	1787	2119	1029	1690	1449	1783	1394	1908	1926	2062	1531	1517	2714	1549	2083	1789	1148	1391	1518	1259	1573	1245	952	1830	1228	1958	829	866	1577	1178	2622	1984	1832	1481	2451	2031	2441	583
(CATA)n	929	965	1103	1272	1318	379	754	766	513	871	1124	1126	1483	942	1586	1034	1617	1338	1225	1483	553	792	991	1833	952	771	532	770	1153	735	1059	763	800	369	628	520	726	787	288	493	652	813	847	1106	745	814	962	1117	400
(CATAA)n	0	0	0	0	0	1	0	0	2	0	0	0	0	0	0	1	1	0	1	0	0	0	0	0	0	0	0	0	0	0	0	0	1	0	0	0	0	0	0	1	0	0	0	1	0	0	0	0	1
(CATAC)n	0	2	0	0	0	2	0	0	0	0	0	0	0	0	0	0	0	1	0	0	0	5	0	1	1	2	0	0	0	0	0	4	0	0	0	0	0	1	0	1	1	1	1	0	0	1	0	3	0
(CATAG)n	0	0	0	0	0	0	0	2	0	0	0	0	0	0	0	0	0	0	0	0	0	0	0	0	0	0	0	0	0	0	0	0	0	0	0	0	0	0	0	2	0	1	0	0	1	1	1	0	0
(CATAT)n	1	0	6	0	0	0	0	0	0	0	0	0	0	0	0	0	2	0	0	0	0	0	0	0	0	0	0	0	0	0	0	0	0	0	0	1	1	0	0	0	0	1	1	0	0	0	0	0	0
(CATATA)n	320	260	294	203	189	108	154	175	140	179	291	301	562	320	412	304	500	380	396	266	159	286	147	340	176	143	122	105	150	226	176	146	115	90	129	129	130	90	82	121	147	194	155	187	216	238	235	228	88
(CATCC)n	0	0	0	0	0	0	0	0	0	0	0	0	0	0	0	0	0	0	0	0	0	0	0	0	0	0	0	0	0	0	0	0	0	0	0	0	0	0	0	0	0	0	0	0	0	0	0	0	0
(CATCT)n	0	0	0	0	0	0	0	0	0	0	0	0	0	0	0	0	0	0	0	0	0	0	0	0	0	0	0	0	0	0	0	0	0	0	0	0	0	0	0	0	0	0	0	0	0	0	0	0	0
(CATG)n	6	1	2	6	2	5	1	2	0	0	1	3	9	1	5	2	5	13	7	1	7	4	5	7	5	1	4	1	0	1	2	3	2	0	2	1	8	1	0	3	5	12	5	4	4	8	6	12	11
(CATGC)n	0	0	0	0	0	1	0	0	0	0	0	0	0	0	0	2	0	0	2	3	1	0	1	0	0	2	3	0	0	0	1	0	0	0	1	0	3	0	0	3	0	2	3	1	0	0	2	1	0
(CATGT)n	0	0	0	0	0	0	0	0	0	0	0	0	0	0	0	0	0	1	0	0	0	0	0	0	0	0	0	0	0	0	0	0	0	0	0	0	0	0	0	0	0	0	0	0	0	0	1	0	0
(CATTA)n	0	0	0	1	0	1	0	0	0	0	0	0	0	0	0	0	0	0	0	0	1	0	0	0	0	0	0	0	0	0	1	0	0	0	0	0	1	0	0	0	0	0	0	1	0	0	1	0	0
(CATTC)n	0	0	1	0	1	0	0	0	1	0	0	0	0	0	1	0	0	0	0	0	0	1	2	0	3	0	0	0	1	2	1	0	0	0	0	0	2	0	1	0	0	0	1	1	0	0	1	1	0
(CATTG)n	0	0	0	0	0	0	0	0	0	0	0	0	0	0	0	0	0	0	0	0	0	0	0	2	0	0	0	0	0	0	0	0	0	0	0	0	0	0	0	0	0	0	0	0	0	0	0	0	0
(CATTT)n	0	0	0	2	0	0	0	0	0	0	0	0	0	0	0	0	0	0	0	0	0	0	0	1	0	0	0	0	1	0	0	0	0	0	0	0	0	0	0	0	0	0	0	0	0	0	2	0	0
(CCA)n	318	422	402	401	382	245	306	342	311	422	481	582	610	318	611	539	536	638	513	495	517	458	411	651	381	371	348	302	272	297	358	340	338	206	361	309	430	338	241	412	523	784	554	593	472	515	516	602	465
(CCAA)n	64	40	41	15	33	27	33	22	31	53	52	59	66	16	44	31	61	65	62	67	56	51	38	70	29	41	20	26	30	26	30	54	40	21	28	37	35	29	11	31	43	83	58	40	59	43	55	76	39
(CCCA)n	1	5	5	1	0	1	4	6	11	1	6	4	9	4	1	1	9	5	5	5	4	1	4	6	5	8	6	0	6	6	3	7	4	6	6	1	10	4	4	10	3	11	12	6	9	13	6	6	7
(CCCCAA)n	44	21	9	28	9	10	10	23	16	18	21	27	45	20	41	19	21	23	6	11	13	9	20	25	24	19	5	13	14	10	10	6	13	5	8	6	16	9	5	12	17	26	6	9	30	16	19	9	12
(CCCCAG)n	167	310	205	181	140	134	174	214	179	164	146	214	202	167	230	158	173	249	146	194	277	196	209	335	207	198	196	145	190	113	177	135	148	113	136	144	221	135	136	176	219	401	204	209	233	272	241	227	188
(CCCCCA)n	75	85	75	70	57	51	61	55	65	100	94	129	93	59	98	86	98	87	93	102	91	85	78	109	110	93	87	53	79	55	81	90	56	30	79	57	81	50	47	87	162	229	153	108	101	59	123	100	49
(CCCCCG)n	2	10	11	3	12	6	5	3	4	6	1	8	11	3	14	13	16	17	9	19	9	11	7	34	6	10	4	8	4	7	7	6	6	6	6	11	5	14	3	13	14	26	9	11	20	14	16	14	9
(CCCCCT)n	4	3	3	4	2	4	2	9	1	5	4	8	13	6	3	3	5	6	5	8	7	7	11	4	2	7	11	2	8	1	6	1	1	1	9	1	7	2	4	4	8	10	5	6	9	6	8	6	24
(CCCCG)n	114	123	109	97	140	83	117	150	98	157	161	221	137	83	125	99	130	95	109	173	168	132	107	264	129	177	170	91	149	113	106	143	131	91	144	117	114	57	86	156	107	206	170	162	103	173	179	144	46
(CCCG)n	3	1	0	3	2	0	0	1	0	0	0	2	2	1	2	3	1	1	2	0	1	2	1	3	1	7	1	1	0	0	1	1	2	0	1	1	1	0	0	4	0	2	1	1	0	0	2	3	6
(CCCGAA)n	124	233	176	128	168	174	168	211	125	184	235	209	144	97	172	147	222	103	164	138	73	99	63	122	165	197	125	152	147	159	151	152	179	95	121	142	82	87	83	65	161	306	136	120	105	101	164	199	147
(CCCGG)n	0	1	0	1	0	0	0	0	0	0	2	0	0	1	0	1	0	1	0	0	1	0	2	0	0	0	2	0	3	0	0	2	0	0	0	1	0	0	0	0	0	0	0	0	1	0	0	0	0
(CCCTA)n	0	0	0	0	0	0	0	0	0	0	0	0	0	0	0	0	0	1	0	0	0	0	0	0	0	0	0	0	0	0	0	0	0	0	0	0	0	0	0	0	0	0	0	0	0	0	0	0	0
(CCCTAA)n	21	16	35	19	17	17	15	24	13	23	37	33	26	13	22	26	41	33	21	29	23	26	25	33	24	18	11	20	19	31	26	18	13	19	19	7	8	14	12	22	27	47	25	25	31	15	26	26	27
(CCCTAG)n	0	0	0	0	0	0	0	0	0	0	0	0	0	0	0	0	0	0	0	0	0	0	0	0	0	0	0	0	0	1	0	0	0	0	0	0	0	0	0	0	0	0	0	0	0	0	0	0	0
(CCCTG)n	1	9	2	3	4	5	7	2	5	5	1	3	1	1	8	3	11	5	3	4	7	0	4	1	4	4	11	7	9	6	2	8	4	2	2	4	5	4	3	8	11	12	3	11	4	5	9	8	16
(CCG)n	405	591	339	319	367	327	408	528	345	546	578	694	531	255	465	431	386	406	354	744	861	398	543	1017	527	764	666	411	447	450	476	553	553	460	529	560	492	221	351	726	441	998	1026	891	405	599	857	676	206
(CCGAA)n	1	0	0	0	2	0	0	2	0	0	0	0	0	0	0	0	0	1	0	0	0	0	1	0	0	0	0	0	0	0	0	0	0	0	1	0	0	0	0	0	0	0	2	0	0	0	1	1	3
(CCGAG)n	22	77	43	54	49	42	27	52	45	32	28	25	59	33	79	69	43	84	27	70	80	39	34	89	53	48	60	32	32	18	53	29	35	55	35	51	80	29	30	75	48	153	96	77	69	116	70	90	21
(CCGCG)n	3	18	7	2	6	6	9	9	0	11	12	15	5	3	12	6	4	9	9	12	19	12	15	24	1	2	8	7	6	6	8	11	8	3	8	7	14	4	5	10	3	18	9	5	4	8	10	12	1
(CCGGG)n	58	30	43	47	42	19	30	28	17	40	47	41	80	44	61	68	120	76	53	79	26	37	24	78	25	15	14	34	26	40	34	16	25	13	28	19	32	39	7	21	16	53	48	37	23	38	45	32	2
(CCTA)n	0	0	0	0	0	0	0	0	0	0	0	0	0	0	1	0	0	2	0	0	0	0	0	0	0	0	1	2	0	1	0	0	0	0	1	0	3	0	0	0	0	0	0	0	0	1	0	3	1
(CCTAT)n	0	0	0	0	0	0	0	0	0	0	0	0	0	0	0	0	0	0	0	0	0	0	0	0	1	0	0	0	1	0	0	0	0	0	0	0	0	0	0	0	0	0	0	0	0	0	0	0	0
(CCTCG)n	3	1	0	0	0	2	3	4	1	4	4	2	0	0	2	0	1	3	1	3	1	3	0	1	2	5	4	4	4	1	1	3	4	7	7	6	0	1	0	0	3	0	1	1	0	1	2	1	1
(CCTG)n	13	10	14	4	14	5	7	10	12	7	5	15	19	9	16	10	21	16	19	8	22	16	13	23	12	11	17	7	16	4	16	11	10	13	6	10	12	5	8	7	19	31	20	16	24	11	12	16	69
(CCTTG)n	0	0	3	0	0	2	0	0	1	1	3	4	10	2	8	1	4	7	6	12	7	10	5	6	1	0	1	4	0	2	1	3	0	1	0	1	3	1	4	3	5	8	10	4	9	2	2	7	13
(CG)n	0	3	3	0	1	1	0	3	1	3	1	4	1	1	4	2	2	8	2	2	4	5	1	6	1	5	1	0	1	0	1	7	1	0	6	1	2	1	2	0	1	2	3	2	3	2	4	4	2
(CGA)n	177	262	199	280	138	104	125	152	147	185	198	304	284	252	282	269	248	217	227	274	123	196	179	264	97	139	112	83	101	148	113	81	96	71	78	62	124	53	74	110	129	214	120	107	182	226	145	149	54
(CGAA)n	0	0	0	0	0	0	0	0	0	0	0	0	0	0	0	0	1	0	0	0	1	0	0	0	0	0	0	0	0	0	0	0	0	0	0	0	0	0	0	0	0	0	0	0	0	0	0	1	0
(CGAAA)n	0	0	0	0	0	0	0	1	0	0	0	0	0	0	0	0	0	0	0	0	0	0	0	0	0	0	0	0	0	0	0	0	0	0	0	0	0	0	0	0	0	0	0	0	0	0	0	0	0
(CGAAG)n	0	0	0	0	0	0	0	0	0	0	0	0	0	0	0	0	0	0	0	0	0	0	0	0	0	0	0	0	0	0	0	0	0	0	0	0	0	0	0	0	0	1	0	0	0	0	0	0	0
(CGAG)n	16	19	39	15	11	8	25	34	16	38	29	24	28	15	21	13	28	22	25	40	44	19	19	49	41	79	47	22	39	21	21	34	30	23	45	47	23	11	36	56	27	101	55	74	32	74	84	61	12
(CGAGG)n	1	8	10	2	7	5	11	2	3	6	4	7	9	3	12	8	10	12	18	11	21	18	13	19	6	18	11	2	0	3	3	10	17	3	7	2	8	2	7	21	15	6	13	7	6	14	21	15	1
(CGAT)n	1	0	0	0	0	0	0	0	0	0	0	0	0	0	0	0	0	0	0	0	0	0	0	0	0	0	0	0	3	0	0	0	0	0	0	0	0	0	0	0	0	0	0	0	0	0	0	0	3
(CGATG)n	0	0	0	0	0	0	0	0	0	0	0	0	0	0	0	0	0	0	0	0	0	0	0	0	0	0	0	0	0	0	0	0	0	0	0	0	0	0	0	0	0	0	1	0	0	0	0	0	0
(CGCGG)n	2	2	0	0	1	0	3	2	1	4	2	1	1	0	0	1	1	1	0	3	5	0	1	6	4	5	3	0	3	0	1	5	1	3	2	0	2	0	1	5	0	2	4	3	4	0	5	1	1
(CGCTG)n	10	31	19	34	11	18	14	21	16	19	9	34	47	20	33	19	19	25	13	28	21	22	21	28	12	9	12	7	15	18	10	11	8	3	10	6	12	10	8	14	14	20	12	8	15	14	24	10	2
(CGG)n	290	396	291	259	291	273	266	371	260	362	330	436	479	256	472	381	344	457	418	544	700	374	404	728	325	467	429	223	286	238	318	327	369	281	358	320	323	187	232	472	304	742	574	512	354	473	554	492	288
(CGGA)n	64	98	70	69	61	41	85	69	48	83	106	97	91	50	67	58	64	50	34	57	61	39	42	89	68	87	63	66	86	49	91	62	61	33	84	43	50	22	24	67	91	130	91	83	73	77	126	81	17
(CGGAG)n	25	13	21	14	15	16	17	8	11	12	39	29	38	13	25	20	29	22	35	22	21	12	12	24	4	5	8	10	9	12	18	9	7	6	12	9	4	10	2	9	9	3	6	4	8	5	27	12	8
(CGGG)n	3	4	2	0	0	0	1	0	2	0	4	4	1	1	3	3	1	2	2	1	4	1	6	2	4	1	1	1	4	1	3	4	1	2	3	2	0	1	5	3	1	5	1	0	1	2	3	0	0
(CGGGG)n	12	24	29	21	14	6	19	29	13	27	23	40	18	28	26	22	24	24	15	34	33	24	26	54	17	21	25	16	26	14	20	13	13	7	17	11	27	8	23	36	27	36	31	23	26	25	22	24	16
(CGGGGG)n	0	1	1	0	0	0	0	0	0	0	1	0	1	1	0	2	0	2	0	1	1	1	2	1	0	0	1	0	0	0	0	0	0	1	1	1	1	0	0	1	1	1	0	0	0	0	1	0	1
(CGGT)n	0	0	0	0	0	0	0	0	0	0	0	0	0	0	0	0	0	0	0	0	0	0	0	0	0	0	0	1	0	0	0	0	0	0	0	0	0	0	0	0	0	0	0	0	0	0	0	0	0
(CGGTG)n	0	0	0	1	0	0	0	0	0	0	0	0	0	0	0	0	0	1	0	0	0	0	0	0	0	0	0	0	0	0	0	0	0	0	0	0	0	0	0	0	0	0	0	0	0	0	0	0	0
(CGTG)n	2384	2793	1861	2276	1915	954	1773	1933	1377	2375	2957	3845	4163	2152	3151	2577	3200	2836	2701	2764	1828	2262	1765	3575	2198	2167	1855	1811	2473	1966	1975	1470	1558	847	1512	1011	1692	1318	948	1472	2107	2753	1992	1937	2259	2062	1898	2164	1681
(CGTTG)n	67	69	42	43	67	40	45	50	46	57	89	104	103	34	94	106	81	77	76	103	83	75	64	119	55	46	51	93	62	77	89	43	63	43	25	54	51	33	31	47	82	83	88	100	27	40	67	52	60
(CTA)n	3	2	3	3	1	0	0	3	0	1	6	3	1	5	4	4	6	9	6	2	3	4	5	8	1	6	3	3	3	1	1	2	1	2	2	6	1	1	2	1	1	6	6	0	2	6	4	6	4
(CTAA)n	1	3	0	2	2	0	1	1	0	1	0	0	1	0	1	2	4	3	0	0	0	1	0	1	0	0	0	1	0	5	1	1	2	0	0	0	2	0	0	0	0	6	1	1	1	0	0	0	0
(CTAAA)n	0	0	0	0	0	0	1	0	0	0	0	0	1	0	0	0	0	1	0	0	1	0	1	0	0	0	0	0	0	0	0	1	0	0	0	0	0	0	0	0	1	0	0	1	1	0	0	0	0
(CTAAG)n	0	0	0	0	0	0	0	0	0	0	0	0	0	0	0	0	0	0	0	0	0	0	0	0	0	0	0	0	0	0	0	0	0	0	0	0	0	0	0	0	0	0	0	0	0	0	0	1	0
(CTAAT)n	1	0	0	0	0	0	0	0	0	0	0	0	0	0	0	0	0	0	0	0	0	0	0	0	0	0	0	0	0	0	0	0	0	0	0	0	0	0	0	0	0	0	0	0	0	0	0	0	0
(CTACT)n	4	1	1	3	0	1	2	1	0	3	2	2	4	2	0	2	3	4	1	1	1	1	0	1	0	0	1	0	0	0	0	0	0	0	0	0	0	0	0	0	0	0	1	0	2	1	2	1	0
(CTAG)n	0	0	0	0	0	0	0	0	0	0	0	0	0	0	0	0	0	0	0	0	0	0	0	0	0	0	0	0	0	0	0	0	0	0	0	0	0	0	0	0	0	0	0	0	0	0	0	0	0
(CTAGG)n	0	0	0	0	0	0	0	0	0	0	0	0	0	0	0	0	4	1	0	0	0	0	0	0	0	0	0	0	0	0	0	0	0	0	0	0	0	0	0	0	0	0	0	0	0	0	0	1	0
(CTAGGG)n	0	0	0	0	0	0	1	0	0	0	0	0	1	0	0	0	1	0	0	0	1	0	1	0	0	0	0	0	0	0	0	0	0	0	0	0	0	0	0	0	0	0	0	0	0	0	0	0	3
(CTAGT)n	0	0	0	0	0	0	0	0	0	0	0	0	0	0	0	0	0	1	0	0	0	0	0	0	0	0	0	0	0	0	0	0	0	0	0	0	0	0	0	0	0	0	0	0	0	0	0	0	0
(CTATA)n	6	0	0	2	2	0	0	0	0	1	0	0	1	3	0	2	0	1	0	0	0	0	0	0	3	0	0	0	0	0	1	2	1	0	0	2	0	0	0	0	0	0	0	1	0	1	0	1	1
(CTATG)n	0	3	0	0	1	0	0	0	0	0	0	2	0	0	0	4	1	0	0	0	0	0	0	5	0	0	0	2	0	0	0	0	0	0	0	0	0	0	0	1	0	1	0	0	1	1	0	0	0
(CTATT)n	0	0	0	0	0	1	0	0	0	0	0	0	0	0	0	0	1	0	0	0	0	0	0	0	0	0	1	0	0	0	0	0	1	0	0	0	0	0	0	0	0	0	0	0	0	0	0	1	0
(CTCA)n	32	41	34	44	35	18	17	32	16	28	40	80	68	43	55	51	66	57	53	81	53	69	45	83	15	15	13	24	22	22	34	25	25	10	15	6	27	28	15	27	13	32	34	22	40	43	29	62	44
(CTCCG)n	63	54	21	38	55	35	36	62	48	46	20	44	26	40	48	46	35	34	32	63	74	40	59	93	90	50	72	22	56	20	52	31	49	30	27	59	60	29	33	44	56	123	78	65	43	62	53	55	4
(CTCG)n	143	360	208	154	133	139	210	267	227	288	315	283	219	132	201	161	185	132	231	233	430	228	160	411	177	349	279	152	163	215	194	246	174	115	393	181	168	95	175	341	240	512	318	350	264	382	440	339	21
(CTCGG)n	1	6	7	12	3	7	1	3	4	1	10	14	13	6	2	5	7	7	0	12	5	0	2	17	11	0	2	0	0	6	0	0	7	14	5	0	4	0	1	0	8	1	9	10	3	2	7	0	2
(CTCTG)n	10	10	12	9	9	2	6	9	5	12	9	13	13	15	9	17	15	15	13	20	13	5	9	16	4	4	2	3	1	7	7	12	7	1	10	3	6	3	1	6	9	9	7	15	2	15	6	8	0
(CTG)n	1259	1730	1288	1290	1111	717	1118	1259	1049	1464	1440	1708	1878	1284	2087	1653	1696	1788	1720	1719	1826	1371	1202	2492	1182	1635	1270	917	1193	905	944	1053	1029	810	1131	976	1358	890	711	1437	1114	2408	1640	1545	1322	1805	1927	1773	1394
(CTGGGG)n	91	167	143	121	120	78	89	104	108	135	118	99	161	95	197	176	168	235	140	156	172	134	139	272	122	160	112	57	56	73	111	144	148	71	121	128	90	67	85	207	134	270	215	173	106	191	135	195	69
(CTGTG)n	5	10	5	3	5	7	4	6	7	5	10	10	12	8	6	7	9	4	3	5	9	4	9	8	8	5	5	14	2	6	6	18	11	5	1	13	8	0	2	11	10	20	2	11	12	9	8	5	63
(CTTA)n	0	2	1	0	3	0	0	4	1	0	1	0	1	0	0	0	1	2	0	0	2	0	0	4	0	1	1	0	1	3	1	0	1	0	1	1	0	1	2	0	0	1	0	1	0	1	0	0	7
(CTTAT)n	0	0	0	0	0	0	0	0	0	0	0	0	0	0	0	0	1	0	0	0	0	0	0	0	0	0	0	0	0	0	0	0	0	0	0	0	0	0	0	0	0	0	0	0	0	0	0	0	0
(CTTCG)n	0	0	0	0	0	0	0	0	0	2	0	0	0	0	0	0	0	0	0	0	0	0	0	0	0	0	0	0	0	0	0	0	0	0	0	0	0	0	0	0	0	0	0	1	0	0	1	0	0
(CTTG)n	3	2	5	2	2	1	1	0	5	3	1	4	8	4	2	1	10	8	4	5	9	6	4	9	1	4	2	0	2	2	1	2	0	0	3	2	2	1	1	0	3	3	0	5	2	4	3	3	5
(CTTTG)n	3	3	14	4	2	0	8	8	10	14	6	8	7	5	7	5	8	9	12	12	5	5	2	9	5	5	2	4	10	4	1	7	7	5	8	4	4	3	3	5	11	15	14	9	12	16	11	3	15
(G)n	17	32	17	10	19	14	21	19	21	17	29	32	20	15	16	21	17	23	8	22	27	17	25	33	15	14	15	15	20	11	22	22	21	11	16	11	28	9	21	19	17	37	21	25	35	25	21	21	9
(GA)n	1132	1332	1186	1261	981	578	841	1056	771	1146	1416	1723	1992	1199	1681	1436	1766	1664	1539	1568	1136	1146	1036	1900	1005	1098	960	872	1043	985	1012	947	907	543	942	800	864	580	456	848	750	1514	1110	1092	1022	1241	1268	1228	844
(GAA)n	594	739	570	595	436	365	401	602	408	635	572	847	1103	799	1012	710	894	753	858	827	766	837	601	1114	514	649	526	331	446	440	380	453	410	320	556	467	673	351	402	609	596	933	711	684	648	1010	950	980	454
(GAAA)n	801	1177	957	1087	863	409	491	620	481	844	1173	1322	1817	812	1506	1118	1344	1246	1376	1229	877	736	696	1227	611	888	538	696	823	982	779	961	794	479	1016	699	593	467	447	683	629	1120	932	1026	717	1005	1064	934	355
(GAAAA)n	56	87	87	51	89	48	56	69	80	82	94	148	152	65	148	81	116	125	93	141	136	109	97	141	79	134	84	62	97	90	74	145	80	76	94	84	109	60	57	107	63	184	158	138	114	185	229	161	45
(GAATG)n	0	0	0	0	0	0	0	0	0	0	0	0	0	0	0	0	0	0	0	0	0	0	0	0	0	0	0	0	0	0	0	0	0	0	0	0	0	0	0	0	0	0	0	0	0	0	0	0	0
(GACTG)n	0	0	0	0	0	0	0	0	0	0	0	0	0	0	0	0	0	1	0	0	0	0	0	0	0	0	0	0	0	0	0	0	0	0	0	0	0	0	0	0	0	0	0	0	0	0	0	0	0
(GAGAA)n	19	14	8	8	15	10	11	22	6	7	19	24	18	11	5	6	24	21	18	23	16	12	10	19	15	37	11	6	14	18	4	12	15	8	15	6	10	5	9	15	18	30	29	21	5	12	32	13	21
(GAGTG)n	0	0	0	0	0	0	0	0	0	0	0	0	0	0	0	0	0	0	0	0	0	0	0	0	0	0	0	0	0	0	0	0	0	0	0	0	0	0	0	2	1	0	1	1	0	0	0	0	0
(GCATG)n	0	0	0	0	0	0	0	0	0	0	0	0	0	0	0	0	0	1	0	0	0	0	0	0	0	0	0	0	0	0	0	0	0	0	0	0	0	0	0	0	0	0	0	0	0	0	0	0	0
(GCCTAA)n	0	0	0	0	0	0	1	0	0	0	0	0	0	0	0	0	0	0	0	0	0	0	0	0	0	0	0	0	0	0	0	0	0	0	0	0	0	0	0	0	0	4	0	0	0	0	0	0	0
(GCCTG)n	9	32	19	28	18	10	21	27	27	18	34	36	43	16	12	8	16	19	8	20	20	5	19	30	34	36	43	20	28	23	18	26	16	16	17	10	18	14	6	22	28	41	18	31	38	29	28	15	34
(GCGTG)n	0	0	0	0	0	0	0	0	0	0	0	0	0	0	0	0	0	0	0	0	1	1	2	0	0	0	0	0	0	0	0	1	0	0	1	0	0	0	0	0	1	1	0	0	0	0	2	1	0
(GCTG)n	0	1	0	1	0	3	0	2	0	0	1	2	0	0	0	1	2	1	0	1	0	0	1	2	0	0	0	0	1	0	0	0	1	0	0	1	2	1	0	1	3	0	0	1	1	1	0	1	2
(GCTTG)n	12	28	12	3	7	12	13	32	13	20	20	19	33	5	22	14	14	7	11	12	10	2	11	16	29	35	21	12	18	10	9	24	9	18	24	15	5	7	11	25	15	24	15	17	20	28	21	26	8
(GGA)n	522	791	723	579	646	482	548	672	633	804	728	996	1051	549	943	722	802	820	768	996	980	652	565	1296	818	1029	905	554	740	569	609	734	699	371	856	627	724	429	451	810	774	1390	989	1085	823	1050	1125	1134	858
(GGAA)n	57	55	52	44	59	51	68	80	55	85	57	86	66	54	83	78	63	57	67	76	80	59	49	67	88	98	82	52	92	60	52	72	80	40	96	78	63	31	38	63	70	104	76	94	96	99	92	89	51
(GGAAA)n	5	1	2	3	7	5	9	4	15	9	5	11	4	0	6	2	7	8	0	6	5	7	2	4	7	11	15	6	8	6	3	11	5	8	12	13	1	2	2	9	10	9	12	7	8	8	8	10	3
(GGAGA)n	49	44	35	34	21	29	48	35	24	23	43	47	64	39	46	40	45	43	47	55	30	43	29	57	34	67	51	25	47	47	27	34	25	21	41	22	26	16	25	29	41	66	39	33	58	43	43	33	129
(GGAGAA)n	19	30	8	23	22	15	24	31	23	25	21	31	24	13	19	16	18	23	19	31	24	30	22	39	39	30	38	14	33	12	24	31	13	22	48	25	19	9	13	31	21	60	27	32	28	47	35	30	15
(GGATG)n	0	3	0	0	0	1	1	3	1	1	0	3	1	0	0	2	3	0	0	0	4	0	5	4	2	0	0	4	1	2	2	8	1	0	4	5	1	3	1	0	5	4	0	0	4	2	0	0	2
(GGCTG)n	39	53	32	62	54	14	36	27	25	33	52	50	50	31	65	41	46	44	29	57	37	59	36	62	54	35	33	52	53	41	52	39	42	16	25	14	37	41	15	22	37	35	16	43	36	40	38	45	66
(GGGA)n	102	106	130	128	195	106	118	137	90	155	132	145	153	115	171	161	196	189	156	177	198	154	122	288	147	159	116	127	134	118	130	79	98	74	106	85	111	99	60	151	230	375	177	185	187	119	138	139	122
(GGGAA)n	0	0	0	0	0	0	0	0	0	0	0	0	0	0	0	0	0	0	0	0	0	0	0	0	0	0	0	0	0	0	0	0	0	0	0	2	0	0	0	0	0	0	1	0	0	0	1	0	0
(GGGAGA)n	35	30	14	42	25	15	30	31	18	41	47	67	35	21	33	19	38	30	28	46	24	34	32	61	36	31	26	32	31	29	29	33	22	17	22	15	30	17	7	16	43	61	19	27	20	11	42	33	31
(GGGGA)n	5	0	2	1	2	2	8	1	2	1	5	2	1	3	1	0	5	4	3	5	2	0	1	2	2	2	3	1	3	1	0	1	1	0	1	1	0	2	0	3	6	13	2	3	5	2	9	2	5
(GGGTG)n	140	151	123	143	160	88	119	96	68	131	145	225	148	103	232	200	151	157	169	180	130	122	164	256	131	103	99	133	149	104	130	82	95	39	69	66	163	101	55	81	140	208	137	159	119	134	84	128	175
(GGTTG)n	0	0	3	0	0	0	0	0	1	0	0	0	0	0	1	1	0	1	0	0	0	0	0	0	0	0	0	0	0	0	0	0	0	0	0	1	0	1	0	0	0	1	0	1	0	0	0	0	0
(GTATG)n	0	0	0	0	0	0	0	0	0	0	0	2	0	0	0	0	5	1	6	0	0	0	0	2	0	0	3	1	0	0	0	0	0	0	0	2	0	0	0	1	1	1	0	0	0	6	0	0	0
(GTCTG)n	1	6	7	8	5	3	2	4	9	4	4	4	7	1	4	2	3	5	3	5	7	7	4	5	8	11	8	3	12	4	0	8	7	8	11	0	3	1	4	3	9	11	12	4	3	5	3	6	8
(GTGTG)n	35	28	27	23	34	23	15	18	19	25	19	58	37	21	25	29	27	35	23	30	37	31	15	29	10	14	15	11	11	12	19	21	8	12	21	4	21	14	9	24	16	26	20	18	26	21	39	27	50
(GTTTG)n	767	1071	533	1017	973	529	635	938	775	966	1014	1298	1119	490	633	724	686	705	799	1020	873	1063	621	2035	1416	1026	1139	1137	1330	886	1362	989	983	568	917	826	1148	790	560	654	993	1734	1095	1211	1249	1192	931	1398	246
(T)n	3179	4276	3012	2677	2778	1885	2511	3560	2055	3202	3921	4757	4725	2586	3866	2797	4042	3169	3750	4334	3222	3379	3156	5261	3284	3849	2841	2382	3754	3060	3442	4070	2673	2456	3557	2851	2741	1883	1460	2866	2388	4931	4274	4724	3966	4541	4737	4232	1735
(TA)n	652	550	538	303	358	188	255	389	184	348	629	556	852	354	611	478	725	699	670	611	248	449	389	660	223	186	128	158	171	371	286	320	230	240	334	243	170	161	90	160	214	326	314	374	384	372	442	420	185
(TAA)n	214	188	741	86	297	230	117	193	91	286	548	640	685	454	1209	673	1104	860	1540	939	448	590	473	798	44	71	35	82	60	209	202	205	160	112	207	158	154	174	92	149	126	170	248	214	223	204	324	602	140
(TAAA)n	169	133	124	91	105	49	75	103	46	107	133	162	207	111	166	137	252	147	168	126	81	86	106	185	91	94	52	80	98	110	112	80	78	62	89	55	56	69	32	58	85	130	88	121	96	93	89	141	134
(TAAAA)n	17	12	22	5	9	15	17	14	7	12	14	26	50	20	28	22	38	35	38	21	15	26	23	15	8	6	7	8	7	10	11	11	8	1	14	2	7	5	6	2	12	16	14	18	13	6	20	14	15
(TAAAAA)n	21	32	23	8	12	10	13	27	13	21	23	33	34	22	47	32	42	33	40	37	16	16	24	29	10	18	7	12	10	15	8	16	8	10	15	15	15	10	11	15	11	25	26	13	19	32	17	31	23
(TAAAG)n	0	0	0	0	0	0	0	0	0	0	0	0	0	0	0	0	0	0	0	0	0	0	0	0	0	0	0	0	0	0	0	0	0	0	0	0	0	0	0	0	0	0	0	0	0	0	0	1	0
(TAAG)n	1	1	0	0	1	1	1	0	0	0	3	1	0	1	1	2	3	1	1	1	4	4	0	7	1	1	3	1	0	1	3	0	0	0	2	1	1	0	0	0	2	2	1	2	1	3	1	0	2
(TAATG)n	0	0	0	0	1	0	0	0	0	1	1	0	1	0	1	0	3	1	2	1	0	1	0	0	0	2	0	0	0	0	0	1	0	0	0	1	0	0	0	0	0	2	0	1	0	0	0	1	0
(TACTG)n	0	0	0	0	0	0	0	0	0	0	0	0	0	0	0	0	1	0	0	0	0	0	0	0	0	0	0	0	0	0	0	0	0	0	0	0	0	0	0	0	0	1	0	0	0	0	1	0	0
(TAG)n	80	134	101	80	109	58	84	118	82	115	180	264	196	97	135	119	112	125	171	148	182	140	160	200	60	102	83	50	66	58	53	81	62	44	90	76	110	61	60	66	63	153	84	54	96	124	116	138	22
(TAGA)n	1971	1454	2399	1605	2101	1097	888	1073	973	1709	2343	3058	3971	2266	3986	3047	4187	3504	3698	3124	2143	3119	2268	3663	538	673	390	956	615	2508	1827	1460	1341	785	1523	1126	1804	1133	768	1045	928	1824	1178	1022	1183	1742	2021	3323	571
(TAGG)n	2	0	0	0	0	0	0	1	0	0	0	1	1	0	3	0	2	4	0	3	0	0	0	0	0	0	2	0	0	0	0	1	0	0	0	0	0	0	0	0	0	0	1	0	0	1	0	0	0
(TAGTG)n	0	1	0	0	0	0	0	0	0	0	0	1	0	0	0	0	0	0	0	0	0	0	0	1	0	0	0	0	0	0	0	0	0	0	0	0	0	0	0	0	0	0	0	0	0	0	0	0	0
(TATAA)n	0	2	2	0	1	2	0	1	0	1	0	0	0	0	0	2	3	0	1	2	0	0	0	0	0	1	0	0	0	0	0	0	0	1	1	0	0	0	0	0	0	0	0	0	1	0	4	5	2
(TATAG)n	0	1	2	1	0	0	1	0	0	0	0	1	0	0	0	0	2	1	0	0	0	0	0	3	0	0	0	0	0	0	0	0	1	0	0	0	1	0	0	0	2	0	0	0	0	0	0	1	0
(TATATG)n	192	199	178	109	69	59	79	139	73	138	155	180	329	168	197	172	271	184	196	176	89	151	99	212	97	130	100	84	103	134	105	129	103	83	133	67	72	41	39	88	72	129	132	118	148	106	151	163	101
(TATG)n	530	559	506	489	416	216	309	404	310	424	648	667	827	389	545	481	649	548	510	649	358	391	442	686	373	381	303	315	409	461	375	390	318	208	387	275	333	243	162	266	375	498	363	417	418	440	416	431	302
(TATTG)n	0	0	0	2	0	0	0	0	1	0	0	0	2	0	2	0	0	0	0	0	0	0	0	0	0	0	1	0	0	1	0	0	0	0	0	0	0	0	0	3	1	3	1	0	0	1	0	0	0
(TC)n	920	1029	912	946	972	555	758	972	730	1012	1146	1366	1596	920	1293	959	1502	1242	1256	1440	1258	1132	881	1876	881	1092	842	702	918	801	827	822	761	554	909	711	764	527	465	824	836	1499	1027	975	1040	1375	1284	1269	726
(TCC)n	1081	1600	1453	1114	1136	873	1147	1550	1189	1686	1630	2059	2436	1270	2114	1557	1815	1715	1912	1981	2020	1588	1417	2888	1311	1961	1552	955	1214	1041	1202	1309	1191	887	1454	1110	1451	830	815	1603	1080	2789	1873	1765	1469	2178	2188	2180	776
(TCCA)n	49	81	47	61	74	43	73	51	55	96	84	127	64	35	76	47	65	85	60	89	59	78	54	100	87	72	72	88	95	68	68	53	61	40	55	42	59	39	42	77	80	118	69	102	84	99	71	81	19
(TCCC)n	64	83	96	70	106	39	38	56	59	80	101	84	151	101	148	103	160	145	126	128	95	66	88	170	61	79	71	66	71	71	73	78	65	41	77	45	51	51	23	73	72	84	46	89	92	59	78	108	59
(TCCCC)n	8	7	9	12	11	4	9	9	10	16	10	9	7	3	19	8	10	7	6	15	12	16	11	16	10	26	14	6	11	13	18	7	6	11	5	9	10	8	6	7	33	36	31	22	52	6	9	9	48
(TCCCG)n	161	263	213	233	208	101	172	196	139	199	232	275	332	183	240	178	181	278	175	247	147	160	96	308	178	133	123	147	179	119	119	159	149	73	127	108	150	103	74	136	143	170	153	164	122	199	145	178	20
(TCCG)n	2	1	1	2	0	1	2	0	1	0	5	0	2	4	0	1	5	2	1	0	1	1	0	4	1	4	1	1	4	2	0	1	0	1	3	0	0	0	1	2	1	5	6	4	1	3	4	1	2
(TCCGG)n	0	0	0	0	0	0	0	0	0	0	0	0	0	0	0	0	0	0	0	0	0	0	0	0	0	0	0	0	0	0	0	0	0	0	0	0	1	0	0	0	0	0	0	0	0	0	0	0	0
(TCCTG)n	0	0	0	0	0	1	2	1	0	0	3	1	9	0	1	1	1	1	0	0	2	0	0	0	0	0	5	4	0	0	0	0	0	0	2	0	1	0	0	0	3	2	3	5	1	3	9	4	0
(TCG)n	41	102	122	72	62	75	59	93	65	95	77	99	80	57	111	85	90	108	69	151	197	87	86	159	58	104	142	37	51	50	58	106	111	76	139	139	60	40	58	121	28	123	118	129	72	114	190	159	23
(TCGGG)n	0	0	0	0	0	0	0	0	0	0	0	0	0	0	0	0	0	0	0	0	0	0	0	0	0	0	0	0	0	0	0	0	0	0	0	0	0	0	0	2	0	0	0	0	0	0	0	0	0
(TCTA)n	37	60	50	50	49	43	26	43	46	37	44	58	77	42	69	78	121	118	79	78	43	65	42	92	33	46	47	11	18	44	39	34	45	22	46	44	32	31	35	30	27	78	58	35	46	75	51	86	92
(TCTCC)n	20	4	6	8	11	12	9	8	12	14	13	22	8	5	13	5	21	14	4	17	21	7	14	33	17	23	25	15	10	22	11	14	20	9	3	6	16	14	7	19	15	42	18	22	13	19	9	11	29
(TCTCCC)n	2	2	2	1	4	3	2	1	2	1	1	7	4	5	2	0	3	3	10	3	3	2	2	5	1	0	1	0	4	1	2	5	0	2	6	0	4	1	2	4	4	6	2	1	3	3	4	5	23
(TCTCG)n	0	0	0	0	0	0	0	0	0	0	0	0	0	0	0	0	0	0	0	0	0	0	0	0	0	0	0	0	0	0	0	0	0	0	0	0	0	0	0	0	0	0	0	0	0	0	0	0	1
(TCTCTG)n	224	315	252	344	263	159	215	216	211	326	226	339	366	170	261	289	305	330	306	328	380	301	228	452	335	374	324	200	269	281	293	283	205	166	281	214	325	192	132	270	301	494	349	341	287	392	366	430	220
(TCTG)n	479	478	756	359	202	195	253	339	258	408	389	514	1171	681	897	888	950	893	1021	414	489	422	301	699	263	419	297	171	247	269	242	269	203	172	367	268	199	103	157	315	193	530	379	258	343	419	569	430	118
(TCTTG)n	0	0	0	0	0	1	0	0	0	0	0	0	0	0	0	2	1	0	0	0	0	0	0	0	0	0	0	0	0	0	0	0	0	0	0	2	0	0	0	0	1	0	0	0	0	0	0	1	0
(TG)n	5496	6900	5992	6641	6006	3242	4946	5516	4081	6265	7544	9131	9916	5397	8032	6743	8743	7785	7256	8119	6463	6514	5729	10175	5949	6461	5200	5145	6283	5776	5621	5268	5078	3136	5539	4129	5535	3989	2808	5001	5608	9501	6703	7412	6419	7256	7153	7435	3969
(TGAA)n	6	13	7	8	14	16	9	16	5	10	7	11	36	8	15	11	26	30	18	10	11	13	15	10	21	20	2	10	13	10	7	10	7	4	7	4	14	9	4	10	13	22	10	10	12	17	9	21	12
(TGAG)n	17	51	53	27	41	26	29	29	32	39	35	77	54	49	58	63	58	60	71	57	61	56	43	63	36	42	31	20	26	25	24	18	26	14	31	32	34	15	26	25	34	75	52	33	53	39	62	50	28
(TGG)n	400	521	425	491	357	229	385	396	293	404	350	417	610	327	560	455	541	528	477	569	489	356	366	731	531	622	477	350	502	341	357	422	362	223	413	358	424	255	249	400	524	865	637	602	437	579	650	577	627
(TGGA)n	383	435	301	546	410	182	392	341	239	410	531	707	581	349	512	461	511	515	394	625	390	415	438	709	499	426	358	429	507	334	470	315	365	189	237	209	344	238	188	308	417	572	445	568	407	409	378	377	139
(TGGG)n	267	112	136	252	183	91	178	127	111	174	314	309	281	151	272	286	390	282	201	332	350	325	404	430	201	117	97	203	235	303	175	130	137	78	114	76	270	155	114	197	331	259	213	214	221	160	184	293	44
(TGGGGG)n	39	50	27	41	45	23	26	41	25	26	29	35	52	40	45	53	58	43	32	38	48	47	45	60	37	50	21	31	31	26	31	25	23	10	11	15	48	32	27	32	28	59	40	43	38	47	40	25	18
(TTA)n	117	166	171	107	85	69	87	127	86	91	149	160	194	93	138	142	174	173	153	147	96	98	98	200	130	153	123	80	78	104	72	125	107	76	138	107	122	43	54	139	119	241	155	139	124	122	185	136	69
(TTAA)n	0	2	0	1	3	2	0	0	1	0	7	2	4	1	2	0	4	5	1	1	1	1	2	0	1	0	0	0	0	1	0	0	0	1	1	1	0	0	1	1	0	1	0	0	0	3	4	5	1
(TTAAA)n	0	0	0	0	0	0	0	0	0	0	0	0	0	0	0	0	0	1	2	0	0	0	1	0	0	0	0	0	0	0	0	0	1	0	2	0	0	0	0	0	0	2	0	1	0	0	0	0	0
(TTAAG)n	0	0	0	0	0	0	0	0	0	0	0	0	0	0	0	0	0	0	0	0	0	0	0	0	0	0	0	0	0	0	0	0	0	0	0	0	0	0	0	0	0	0	0	0	0	0	0	1	0
(TTACG)n	0	0	0	0	2	0	0	0	0	1	0	0	0	1	0	0	0	0	0	0	1	2	1	4	0	1	0	1	3	0	0	0	0	0	0	0	0	1	0	0	0	0	1	0	0	0	0	1	0
(TTAG)n	3	5	0	1	5	4	5	1	5	6	2	9	4	1	1	3	1	2	3	3	1	4	2	4	1	1	2	2	3	5	5	0	3	2	1	2	3	1	0	4	1	7	7	2	6	5	4	2	7
(TTAGGC)n	43	69	73	70	27	17	42	53	64	38	30	41	68	56	51	52	54	77	51	52	86	47	66	90	32	85	50	32	32	29	38	38	42	27	54	47	25	9	22	51	25	80	58	43	26	63	96	81	15
(TTAGGG)n	0	0	1	0	0	3	0	0	0	3	2	0	0	0	7	2	5	3	0	0	1	1	0	0	0	0	0	0	1	0	1	0	0	0	0	1	0	1	1	2	1	0	0	0	1	0	0	3	0
(TTATA)n	0	0	1	0	0	1	0	0	0	0	0	0	1	1	1	0	1	7	0	0	0	1	0	0	0	0	0	0	0	1	0	0	0	0	0	0	0	0	0	0	1	0	0	0	0	0	1	4	0
(TTATG)n	1	0	0	0	0	0	0	0	0	0	0	0	0	0	0	0	0	0	0	0	0	0	0	0	0	0	0	0	0	0	0	0	0	0	0	0	0	0	0	0	0	0	0	0	0	0	0	2	0
(TTC)n	397	397	277	300	345	242	389	485	347	411	346	450	446	233	291	271	358	230	269	426	478	396	389	688	627	715	546	479	575	402	454	462	379	262	418	332	524	244	256	459	507	858	648	590	500	718	607	529	437
(TTCA)n	5	17	16	11	14	16	4	15	14	11	19	22	11	16	11	7	27	27	6	13	20	30	13	18	6	25	14	10	14	20	9	10	8	7	20	2	10	11	5	10	14	20	9	18	16	7	23	38	32
(TTCC)n	189	322	268	258	274	186	237	249	150	362	329	329	373	203	417	282	376	348	382	410	310	330	256	524	315	404	317	249	365	292	291	313	262	150	308	258	244	175	150	257	235	485	395	429	301	432	414	424	238
(TTCCC)n	1	0	0	0	0	0	1	0	1	3	0	1	1	0	1	2	0	1	2	2	1	4	0	1	0	0	2	1	2	3	0	0	3	1	0	1	3	0	0	1	6	4	4	3	1	1	1	3	6
(TTCG)n	2	1	2	1	4	1	1	2	0	5	7	6	5	3	3	6	0	9	4	3	6	2	1	2	1	1	3	3	2	1	2	3	5	0	7	4	1	1	4	1	1	4	6	2	3	7	6	7	2
(TTCGGG)n	1	1	3	0	0	0	0	0	0	0	0	0	0	0	4	0	3	1	4	0	4	2	2	0	1	2	1	2	0	0	0	3	0	0	1	0	0	0	0	0	1	2	0	0	0	0	7	17	0
(TTCTC)n	18	19	15	10	10	12	8	12	6	14	17	13	45	14	14	25	21	18	30	15	15	15	8	13	13	21	13	15	18	5	11	13	12	7	9	19	8	3	12	20	11	33	24	13	20	41	32	18	29
(TTCTCC)n	141	240	177	230	172	124	159	229	133	152	128	198	308	219	242	228	236	218	161	217	196	167	196	332	220	236	186	132	206	142	112	115	146	85	146	108	184	122	89	163	144	273	194	195	229	293	221	213	106
(TTCTG)n	0	0	1	1	0	3	1	2	2	4	1	0	0	0	2	2	2	0	0	1	2	2	0	1	0	0	1	1	0	0	0	3	3	0	0	0	0	0	2	0	1	0	0	0	0	1	0	1	0
(TTG)n	258	271	349	236	279	240	223	222	178	318	387	498	524	274	622	407	656	515	528	585	501	526	483	582	246	265	226	191	206	271	271	241	245	155	289	220	333	257	154	305	306	473	401	406	326	424	343	483	310
(TTGG)n	25	44	37	37	42	35	24	19	39	31	30	59	45	30	65	42	47	44	33	50	56	34	35	84	33	38	35	22	36	25	36	33	25	18	37	21	37	19	15	31	28	62	31	43	47	76	35	46	29
(TTGGGG)n	1	1	5	1	1	1	2	2	3	0	1	2	0	0	0	2	0	2	0	0	2	4	0	2	0	1	2	0	2	2	1	2	2	0	1	0	3	1	1	2	0	1	4	1	0	2	0	3	46
(TTGTG)n	0	1	0	0	2	0	1	1	0	0	3	3	5	6	3	10	4	4	0	9	0	8	4	2	0	0	3	0	2	3	1	0	2	0	1	4	2	0	2	2	0	6	0	0	1	3	2	7	1
(TTTA)n	517	582	438	460	472	225	387	394	265	593	651	689	826	410	634	542	818	550	541	716	347	454	406	863	454	406	356	445	496	574	396	537	445	207	463	309	388	286	232	355	390	462	437	617	400	505	489	484	111
(TTTAA)n	11	19	56	4	33	26	21	22	13	52	64	83	59	12	81	29	94	72	82	114	63	47	39	72	5	5	5	4	5	16	22	37	22	22	28	32	18	19	12	11	13	13	22	20	20	17	52	81	3
(TTTAG)n	0	0	1	2	0	0	0	1	0	0	4	0	4	6	6	2	6	3	5	1	0	4	3	4	0	1	1	1	1	4	0	0	0	1	1	5	0	0	1	3	0	1	1	0	0	2	2	2	0
(TTTC)n	7063	7987	5766	7436	7252	3898	5833	6840	5727	7291	11504	12084	8980	4577	5717	5215	6621	5321	6450	8402	6210	6983	5184	10620	8457	9781	7727	8739	10744	8771	9743	7645	7361	4843	8858	6816	5032	3633	2845	5603	5880	10167	7934	8643	8092	8922	8919	6970	921
(TTTCC)n	1	0	3	2	6	2	2	3	5	5	2	7	1	4	5	9	8	3	5	2	8	7	11	5	4	9	10	1	3	0	3	8	4	0	8	8	4	1	4	10	3	8	6	8	9	5	6	11	5
(TTTCG)n	0	0	0	0	0	0	0	0	0	0	0	0	0	0	0	0	0	0	0	0	0	0	0	0	0	0	0	0	0	0	0	0	0	0	0	0	0	0	0	0	0	0	0	0	0	0	0	0	1
(TTTG)n	2043	2333	2060	1999	1644	941	1482	1701	1205	1969	2317	3274	3527	1963	2934	2279	3086	2686	2507	2400	1735	1968	1633	2995	1917	1779	1578	1624	1912	1550	1789	1295	1448	764	1395	1012	1183	967	682	1142	1503	2140	1684	1709	1836	1810	1717	1929	1451
(TTTTA)n	276	291	260	152	175	126	161	232	110	240	273	296	319	154	303	213	291	223	223	275	154	247	183	293	204	182	171	139	189	162	207	169	154	120	142	150	113	65	61	120	139	193	186	227	179	253	256	247	103
(TTTTC)n	103	168	149	98	123	63	114	121	88	122	143	175	259	154	319	189	231	288	295	215	201	140	149	266	140	208	126	86	120	114	119	147	116	91	135	101	137	83	80	142	126	256	188	227	182	197	219	218	113
(TTTTG)n	920	993	964	970	926	506	673	779	649	927	1075	1350	1562	984	1383	1054	1570	1307	1445	1422	1013	1231	962	1695	618	917	660	556	784	844	714	661	661	422	757	619	705	498	408	701	691	1124	874	899	953	1155	1135	1333	745
(TTTTTA)n	59	85	63	61	56	21	45	66	40	70	103	107	121	59	77	74	117	93	106	106	54	112	69	122	48	40	33	42	41	63	69	42	63	31	58	41	50	42	20	56	47	50	74	52	63	92	60	64	15
(TTTTTG)n	618	653	633	673	595	377	464	657	498	574	640	857	1125	657	978	774	1013	854	1105	916	847	880	750	1152	650	761	699	482	587	532	445	530	490	382	726	480	606	353	331	593	517	1054	842	874	813	1072	1068	1033	636
4.5SRNA	6	11	4	14	9	5	8	2	6	11	15	11	22	6	24	5	15	21	11	12	9	9	6	15	10	10	9	3	15	5	12	6	10	4	3	8	10	1	0	9	14	14	26	8	19	10	8	15	10
5S	184	235	190	188	174	156	210	275	228	234	202	262	298	158	268	196	254	212	205	301	369	271	211	436	167	171	151	113	140	127	162	143	138	123	123	137	262	131	164	216	177	404	263	208	260	368	284	316	170
7SK	40	28	41	50	28	18	20	40	26	27	26	26	50	21	52	39	42	45	24	34	38	34	25	81	29	37	38	23	20	42	31	25	27	21	37	23	23	23	21	28	1275	757	644	37	653	30	36	31	91
7SLRNA	12	16	5	1	7	7	12	11	7	7	19	19	5	6	1	4	1	24	7	13	8	8	9	21	14	17	13	11	7	7	14	14	19	4	17	21	4	3	7	10	9	14	2	16	4	11	12	20	23
A-rich	5225	6842	5418	4975	4741	3611	5073	6129	4375	6799	7430	8475	8401	4626	6983	5572	7404	6028	7407	8029	8095	6288	5496	10858	5992	8848	6856	5203	6223	6761	5657	7364	5656	4769	7913	5963	5416	3054	3496	6789	4803	10615	9034	9320	6359	9265	9856	8991	2151
AT_rich	59728	71182	59549	47234	46552	25250	40212	51796	31556	51726	71081	79282	90969	45348	72185	53443	81658	60567	69773	71346	38020	52693	44956	83472	48924	46372	36115	36918	47391	52978	51371	47273	39786	29655	43410	37061	32347	27311	17308	29913	30382	51615	45425	54091	49202	56175	57669	55034	18461
AmnSINE1	861	1056	842	885	771	453	616	792	572	848	1102	1185	1545	837	1118	1059	1327	1070	990	938	775	758	665	1269	897	814	741	755	840	684	863	761	655	368	760	476	606	500	410	677	879	1214	707	855	892	847	865	730	398
AmnSINE2	869	1312	751	1060	799	428	823	848	689	935	1171	1438	1645	867	1069	959	1116	925	775	984	771	757	629	1507	975	1047	867	769	917	777	788	725	670	358	714	537	675	508	333	671	714	1158	798	795	820	846	787	867	125
Arthur1	105	57	52	52	76	61	61	50	49	105	70	133	71	44	65	75	134	92	91	139	105	106	114	169	99	148	62	109	93	133	90	116	80	57	110	72	154	97	67	86	131	179	107	208	147	140	146	251	104
Arthur1A	12	13	16	11	17	13	9	5	17	13	3	12	31	17	21	19	18	17	17	13	24	20	15	13	2	10	8	3	14	16	9	7	7	5	11	8	3	5	7	6	5	19	4	3	13	6	15	25	2
Arthur1B	24	9	2	8	5	8	7	7	5	9	6	24	15	2	5	7	14	8	15	12	10	9	7	5	13	11	4	10	6	10	9	7	9	15	7	9	5	6	5	5	3	43	9	11	10	9	11	20	36
Arthur1C	0	0	2	0	1	2	0	5	1	0	0	1	17	0	0	0	3	2	0	9	4	0	1	0	0	0	6	0	0	1	0	4	1	0	0	1	0	0	0	2	3	4	2	0	0	0	0	1	1
B1F	5398	6295	5213	5669	4749	2842	4199	5121	3782	5375	6645	8533	9510	4849	6534	5786	7479	6452	6340	6868	5031	5259	4219	8473	4894	5662	4448	3927	4799	4728	4147	4074	3784	2327	4595	3222	3980	3014	2256	4217	4418	6758	4997	4853	5365	5896	5784	5955	4005
B1F1	2242	2149	2100	1823	1587	1066	1420	1651	1284	1798	2142	2875	3856	2048	3017	2674	3401	2988	3101	2546	2069	2149	1676	3195	1619	1793	1425	1194	1376	1567	1491	1378	1347	800	1585	1053	1281	930	757	1423	1481	2580	1986	1846	1842	1992	2089	2224	1995
B1F2	1129	1558	1341	1303	1167	899	1113	1370	1001	1306	1497	1841	2268	1300	1712	1470	2191	1889	1796	1861	1547	1618	1219	2399	1256	1420	1220	985	1212	1151	1060	896	907	592	1119	804	1249	840	649	1238	1505	2394	1519	1348	1634	1697	1580	1721	1470
B1_Mm	1742	2013	2071	1643	2187	1342	1676	1948	1516	2504	3143	3758	3525	2144	3862	2907	3880	3444	3874	4440	2881	2781	2436	4672	1766	2433	1818	1612	2061	1720	1732	2304	2026	1134	2087	1437	2715	1947	1305	1998	2023	4029	2912	2587	2642	2687	2888	4098	1437
B1_Mur1	6712	8486	6260	7045	8931	4470	8212	8144	6342	9480	12153	13908	10629	5974	8787	6500	10040	8269	7560	11899	7319	7679	7349	14958	10178	9535	7973	8702	11639	8250	8907	8859	8435	5123	7929	6374	7566	6702	4247	7623	8890	12412	9331	12420	8626	9687	8547	10272	5673
B1_Mur2	3653	4367	3485	3862	3372	2325	2967	3593	2726	3698	4469	5680	6666	3268	4719	4273	5513	5200	4884	5108	3928	3863	3094	6359	3405	3969	3381	2518	3487	3623	3096	3154	2825	1969	3339	2306	2830	1889	1638	2964	2981	4897	3693	3383	3825	4217	4249	4636	2761
B1_Mur3	3898	4780	3194	4197	4276	2201	3224	3433	2767	4505	4537	5997	6244	3101	4680	3895	5527	4562	4338	5367	3711	3453	3651	6743	3811	4551	3560	3086	3957	3710	3841	3476	3583	1978	3174	2491	3422	2811	1650	3000	2938	4999	3661	4093	3196	4101	3874	4997	2829
B1_Mur4	3925	5442	4695	3981	4451	2731	3587	4262	3093	4314	5274	6152	6363	3846	5790	4604	5872	6212	4828	5930	4611	4448	3906	7223	4384	4473	3810	3766	4655	3543	3680	3235	3536	2307	3793	2825	3384	2977	1987	3694	3694	5981	4275	4853	4108	5104	4214	5291	3135
B1_Mus1	4360	6374	5151	4879	4444	3087	4034	4739	3698	4885	5506	6207	8087	4507	6320	5242	6862	6773	5610	6750	5402	5281	4528	9113	5173	5946	4839	3635	4891	4074	3938	4106	3931	2686	4678	3266	4157	3241	2566	4742	4795	8187	6408	6181	5962	6840	6199	6513	4704
B1_Mus2	2542	3135	2603	2647	2242	1953	2134	2798	2139	2909	3277	3265	4742	2564	3434	3042	4063	3751	3338	3948	3229	2884	2165	5140	2910	3830	2809	2052	2809	2478	2206	2632	2302	1690	3037	2052	2427	1761	1457	2969	2998	4913	4043	3663	3490	4257	4121	4044	2953
B2_Mm1a	533	556	524	384	285	255	342	414	237	484	458	635	1069	404	754	636	866	741	544	947	1299	736	1032	2225	574	552	337	301	419	425	443	758	369	382	741	386	1348	749	1061	1394	1454	3243	4032	2080	3017	1989	2513	3066	1259
B2_Mm1t	426	418	415	292	273	277	222	279	210	441	382	506	793	323	544	587	791	761	580	904	1187	590	1111	1428	402	445	296	265	317	317	421	603	362	258	611	284	1149	671	910	1187	1639	3310	4057	1682	2731	1466	2222	2235	1277
B2_Mm2	2967	2995	2688	2497	2075	1730	2042	2394	1733	2732	3008	3428	5290	2414	4128	3358	5738	5123	3830	3967	3189	2990	2972	5300	2421	2671	2007	1551	2161	2264	2017	2371	1762	1403	2703	1512	2590	1876	1713	2545	3869	5416	6089	3789	5594	3675	4585	6175	5611
B3	11763	14354	11612	11373	10396	7315	9092	11230	8463	12336	14669	17453	19110	9928	14315	12764	18079	16020	14972	15221	11588	11556	9777	18408	12150	14163	11275	9213	12532	11462	10300	11300	9238	6219	11837	7516	8955	6673	5449	10060	10850	16678	12607	13291	12575	13626	15073	15470	13023
B3A	5322	6094	5186	5406	5407	3611	4469	4951	3992	6005	6696	8048	9270	5016	7265	6420	9231	8277	7553	8031	6281	6356	5562	10575	5814	6472	5072	4354	5666	5213	4913	5192	4313	2779	5144	3404	5115	3680	2611	4680	5371	8687	6080	7172	5732	6544	6871	8228	6419
B4	3067	3733	2852	3037	2742	2093	2587	2972	2404	3255	3645	4297	5100	2659	3932	3560	4925	4866	4305	4417	3738	3645	2816	5169	3179	3656	3145	2232	2956	2636	2837	2640	2245	1442	2770	1813	2644	1904	1421	2668	3220	5342	3115	3393	3637	3737	3826	4610	3709
B4A	3991	4725	3880	4212	4455	3025	3552	3982	3533	4750	5166	6420	8257	4552	6431	5408	8161	7973	6174	7411	5561	5502	4983	8655	4369	5115	4232	3541	4410	4500	3686	3804	3383	2227	4008	2876	4541	3198	2209	4281	5367	7937	5595	5740	5509	6251	6195	7869	5171
BC1_Mm	1713	2017	1521	1621	1669	1188	1478	1924	1162	1952	2313	3886	2558	1351	2105	1767	2318	1887	1886	2388	1972	2336	1713	2883	1668	1517	1280	1432	1646	1713	1761	1396	1191	941	1238	1110	1518	1068	1020	1486	1435	2336	1670	1723	1504	2106	1638	1844	467
BGLII	210	276	234	249	308	283	256	304	255	334	326	396	483	290	410	398	441	398	340	582	436	506	467	787	370	316	319	214	300	286	304	263	270	192	263	233	367	199	177	306	353	571	426	511	358	439	447	602	393
BGLII_A	1	19	12	15	27	38	10	10	7	24	19	26	20	14	25	17	39	36	25	25	22	23	34	82	14	16	6	7	6	12	14	20	6	3	22	5	16	7	12	17	35	31	12	17	23	8	36	48	16
BGLII_B	13	20	21	11	30	91	36	41	26	44	31	52	38	26	39	26	68	52	33	43	66	31	32	44	52	55	58	38	29	37	44	38	44	15	31	21	47	19	18	36	33	81	57	36	75	58	20	115	40
BGLII_B2	130	78	71	116	100	70	93	114	73	113	165	164	127	97	133	140	159	121	136	120	110	134	94	171	101	93	65	113	107	98	88	51	76	41	60	61	74	53	38	60	80	55	68	89	96	101	55	100	27
BGLII_C	10	23	4	1	8	20	29	17	44	45	32	19	6	4	2	2	11	9	4	33	21	17	5	42	20	62	48	18	19	20	22	56	19	35	30	17	25	4	21	31	9	40	28	53	41	39	37	32	10
BGLII_Mur	1	6	23	5	0	49	1	21	3	1	13	2	10	2	25	6	28	51	6	22	23	11	4	9	7	4	8	1	0	11	9	7	3	1	11	9	10	7	0	2	5	21	3	9	11	19	6	39	23
BGLII_Mus	22	42	34	46	35	45	41	37	37	37	34	61	86	90	108	59	101	93	73	50	61	81	79	95	32	37	26	32	39	27	21	19	23	7	26	29	64	39	22	41	37	83	63	43	43	49	38	81	25
BLACKJACK	10	18	4	7	4	22	36	17	18	15	20	48	45	21	33	24	50	43	56	17	27	39	4	9	4	12	12	9	12	25	6	12	14	8	10	18	13	6	6	16	9	14	11	20	19	10	23	53	131
C-rich	835	1100	948	868	833	654	783	832	615	1034	1102	1241	1349	767	1328	1029	1277	1191	1248	1272	1223	1080	1060	1614	837	991	845	632	882	639	806	830	732	527	812	588	913	592	516	931	952	1649	1008	1039	976	1122	1044	1269	755
C573_MM	0	0	0	0	0	0	0	0	0	0	0	0	0	0	0	0	0	0	0	0	0	0	0	0	0	0	0	0	0	0	0	0	0	0	0	0	0	0	0	0	0	1	0	0	0	0	0	0	0
CR1_Mam	88	148	84	149	62	50	76	88	51	62	81	170	119	84	91	66	118	108	70	83	56	55	63	91	83	68	49	51	75	82	81	57	59	33	70	52	52	25	20	49	64	116	68	57	63	66	106	81	116
CT-rich	4057	5649	4929	4924	3997	3453	4568	6087	4851	6194	5464	6121	6138	3470	5438	4822	5169	4808	5710	6275	7533	5391	4820	9667	6300	9411	7366	4379	5974	5045	4624	5869	4717	3723	7059	4699	5261	2735	3308	6669	4698	11050	7680	7548	6080	8455	9128	8422	4510
CYRA11_Mm	4	1	5	2	5	4	3	2	5	1	6	3	3	2	4	2	11	12	5	3	5	5	3	5	0	1	3	0	2	1	4	0	4	1	3	1	4	2	1	1	3	6	7	7	2	4	2	4	5
Chap1_Mam	39	92	36	36	28	27	35	53	33	37	40	45	82	18	19	31	55	31	16	35	27	29	13	42	42	35	33	24	36	35	55	37	13	18	26	24	16	8	18	28	33	36	21	27	35	33	22	30	56
Charlie1	105	94	50	75	108	54	75	92	63	117	87	108	120	76	61	74	126	111	107	95	100	94	90	172	72	113	115	71	89	87	99	91	82	53	102	32	66	41	28	89	63	85	71	56	103	147	83	113	40
Charlie10	143	93	26	56	36	15	40	41	56	71	36	60	94	42	57	40	44	40	17	45	13	32	22	114	34	58	32	19	15	53	37	34	37	6	26	11	24	10	16	18	19	39	17	19	33	43	60	70	17
Charlie10a	0	0	2	1	0	1	0	1	1	0	1	2	5	0	2	0	0	0	0	1	0	1	2	0	0	1	0	0	0	0	0	0	0	0	3	0	0	2	0	1	1	5	0	0	2	2	2	0	0
Charlie10b	0	0	0	0	0	0	0	0	0	0	0	0	0	0	0	0	0	0	0	0	0	0	0	0	0	0	0	0	0	0	0	0	0	0	0	0	0	0	0	0	0	0	0	1	0	0	0	1	0
Charlie11	0	0	0	2	0	7	0	1	1	0	0	0	3	0	0	3	0	3	0	1	0	0	0	0	0	3	0	0	0	0	0	2	0	0	0	0	0	0	0	2	0	0	0	1	0	0	1	2	7
Charlie12	12	12	15	18	6	15	14	9	7	13	17	30	31	11	12	14	25	24	13	22	12	7	16	20	25	10	15	14	10	7	4	7	8	1	8	2	10	1	7	7	3	11	5	9	5	13	5	14	64
Charlie13a	13	19	1	13	27	7	6	15	11	19	8	18	14	17	10	5	19	23	7	7	11	6	23	2	18	13	11	10	9	13	5	10	8	10	4	1	10	4	6	2	10	11	10	18	18	8	18	11	7
Charlie13b	0	0	0	1	3	0	0	2	0	0	0	0	0	1	0	2	0	4	0	2	0	0	1	5	0	0	0	1	0	0	1	0	0	0	0	0	0	0	1	1	0	0	0	0	3	0	5	3	0
Charlie14a	0	0	1	0	5	1	1	1	1	4	1	4	3	3	2	0	2	3	2	1	1	2	3	3	0	3	0	6	0	3	0	0	1	2	1	0	1	5	1	1	4	7	0	3	3	4	0	4	2
Charlie15a	5	10	8	9	6	5	4	5	13	7	20	3	24	7	13	8	18	10	17	6	5	2	3	13	1	15	12	4	2	11	1	6	8	1	10	12	1	0	8	0	2	3	5	1	9	9	13	11	4
Charlie15b	15	26	27	29	17	12	22	8	22	25	45	11	82	15	33	27	22	38	32	14	33	18	16	48	22	14	30	16	34	22	18	21	13	12	22	15	7	12	4	30	16	40	14	11	21	18	32	39	98
Charlie16a	100	108	90	122	114	59	60	79	58	121	134	174	179	81	123	98	123	108	75	167	119	112	88	216	133	102	80	99	174	134	107	96	73	51	77	85	166	99	81	92	103	148	161	209	134	162	125	191	17
Charlie17	10	4	2	9	1	4	7	4	4	1	2	5	1	3	3	0	4	2	1	5	2	1	0	2	10	8	4	3	9	18	4	7	5	2	2	1	0	1	1	0	6	1	4	0	0	7	0	0	1
Charlie17a	1	4	3	0	1	3	1	6	7	7	5	6	6	1	2	6	4	2	6	3	10	2	3	6	3	10	4	3	3	1	8	7	5	3	7	2	2	2	2	5	1	5	7	6	8	3	9	4	1
Charlie17b	0	7	25	13	23	10	17	8	17	14	22	23	24	7	11	27	25	25	33	16	19	11	16	35	10	7	12	6	11	12	24	14	13	1	15	1	17	16	5	5	8	29	10	21	28	14	16	14	16
Charlie18a	218	229	148	211	165	82	115	147	97	228	226	213	316	151	204	173	255	169	175	180	108	124	112	258	214	247	177	152	195	209	203	160	112	85	192	98	125	101	65	104	119	233	177	186	109	189	173	186	40
Charlie19a	36	14	18	20	39	12	14	17	15	25	23	31	23	16	6	8	32	16	15	32	7	9	10	12	33	8	8	12	14	17	8	20	16	7	17	6	24	4	10	11	35	16	11	20	23	7	15	17	20
Charlie1a	642	680	618	708	543	256	459	512	316	530	727	869	1211	461	857	648	994	656	689	576	470	530	461	783	367	431	362	361	531	569	338	358	322	189	318	281	328	220	141	255	274	515	331	336	383	440	439	547	250
Charlie1b	64	61	64	47	76	19	36	53	30	52	74	80	165	40	60	65	119	87	58	90	48	52	24	72	41	49	53	33	44	116	46	60	45	27	72	34	39	16	10	55	59	49	55	43	39	40	65	54	97
Charlie20a	0	2	0	4	8	4	0	1	1	6	5	2	5	2	2	5	11	1	7	7	7	5	2	6	4	4	2	5	9	2	5	0	0	3	1	2	4	1	4	0	13	4	2	8	2	8	8	6	19
Charlie21a	42	13	26	6	8	2	13	11	7	19	11	13	22	15	21	12	29	23	28	10	4	10	5	13	8	2	1	5	9	5	10	14	2	5	3	5	5	6	4	1	2	5	4	12	7	11	8	7	24
Charlie22a	67	91	82	55	65	39	57	66	39	55	75	110	98	33	78	56	76	91	82	114	107	92	50	125	62	60	34	47	55	56	69	51	52	30	28	28	44	40	20	44	37	61	45	63	70	76	69	61	16
Charlie23a	0	0	5	4	0	2	1	0	2	3	2	0	3	0	0	3	0	6	1	0	0	6	0	3	0	1	0	0	1	2	0	1	0	5	1	0	0	0	0	1	0	0	0	2	0	9	0	2	7
Charlie24	176	173	156	169	92	78	93	179	118	102	158	149	131	150	205	164	167	78	121	122	179	95	112	147	105	97	107	93	119	107	100	152	92	58	140	85	67	47	28	66	129	198	126	83	103	93	137	132	150
Charlie25	2	0	3	4	9	1	0	8	0	6	0	4	0	0	4	8	11	11	7	5	11	13	0	15	0	7	4	6	5	4	4	0	0	3	3	3	0	1	2	13	1	3	2	2	0	1	2	8	3
Charlie26a	0	0	6	1	1	4	2	5	1	2	2	6	2	1	0	6	2	2	15	1	1	3	0	1	3	0	2	1	2	0	1	3	3	0	4	1	0	0	1	4	4	10	0	0	0	0	4	4	19
Charlie29a	6	8	0	3	6	5	6	7	2	0	6	5	7	0	3	5	2	6	5	2	2	8	2	2	6	2	5	3	0	10	2	1	1	3	2	3	9	1	0	7	6	17	1	11	8	3	4	5	12
Charlie2a	16	30	38	14	15	13	17	29	12	17	21	35	61	49	75	33	44	57	72	40	36	18	20	30	10	12	15	11	13	26	17	15	10	7	30	20	28	10	14	15	21	24	27	11	48	34	34	39	19
Charlie2b	191	145	174	108	123	70	98	104	102	109	186	150	180	149	232	171	247	165	198	144	190	150	131	192	118	150	93	60	84	108	95	100	80	48	117	63	116	40	55	80	97	214	111	111	113	139	196	151	138
Charlie4	4	5	0	1	5	1	5	3	0	5	8	7	10	3	3	0	4	9	1	1	1	2	5	3	4	3	0	5	6	5	0	0	0	1	3	0	10	10	0	6	3	13	6	2	0	5	10	4	0
Charlie4a	64	56	33	36	69	46	31	41	32	50	67	94	100	37	50	49	84	57	70	73	37	36	21	72	66	55	70	45	44	42	45	49	26	13	50	29	32	23	17	25	33	50	37	57	35	59	44	53	108
Charlie4z	8	11	21	25	13	10	8	14	14	7	31	26	29	13	11	19	31	23	17	28	11	13	28	41	28	18	19	18	35	22	7	17	10	14	23	5	11	12	9	10	15	10	31	21	14	18	20	22	22
Charlie5	823	743	843	1108	788	366	532	911	571	760	989	1195	2265	1054	1405	1144	2017	1037	1559	935	667	991	868	1384	689	659	616	480	664	572	622	556	483	351	652	448	584	531	229	340	363	826	443	472	622	677	802	790	253
Charlie6	241	529	400	328	323	230	287	454	282	440	359	718	377	238	347	302	307	296	219	448	405	330	283	525	334	383	294	284	253	207	265	273	350	230	267	227	298	220	169	313	342	531	301	286	373	418	355	421	35
Charlie7	133	136	96	101	74	47	58	70	61	70	113	143	132	54	127	62	94	113	93	102	51	53	48	91	48	69	32	66	44	100	72	90	56	52	114	50	31	32	18	54	34	51	59	57	21	70	65	61	47
Charlie7a	11	0	6	9	7	3	1	9	5	1	8	4	4	12	3	3	9	4	7	10	5	7	7	3	3	1	2	2	1	7	4	1	5	4	5	1	0	1	0	0	6	6	2	5	2	3	2	1	7
Charlie8	100	164	111	87	46	48	79	58	78	113	147	136	77	55	91	86	99	126	139	102	118	36	38	121	165	164	139	62	127	67	71	98	72	11	86	64	73	33	40	50	170	259	95	113	167	100	92	112	446
Charlie9	58	58	70	54	47	33	42	72	57	79	60	39	77	10	26	28	37	42	61	94	56	35	9	96	59	111	89	20	89	38	41	100	69	32	108	33	35	24	18	65	39	103	62	74	87	94	97	77	28
Cheshire	358	304	309	338	290	116	233	200	151	240	291	349	479	260	393	287	513	337	460	330	213	302	217	483	281	260	246	196	248	288	213	304	190	131	200	187	235	180	98	197	198	240	198	241	234	288	280	350	139
Cheshire_Mars	0	0	0	0	0	0	0	0	0	0	0	0	0	0	0	0	0	0	0	0	0	0	0	0	0	0	0	0	0	0	0	0	0	0	0	0	0	0	0	0	0	0	0	0	0	0	0	0	0
Cheshire_Mars_	0	0	0	0	0	0	0	0	0	0	0	0	0	0	0	0	0	0	0	0	0	0	0	0	0	0	0	0	0	0	0	0	0	0	0	0	0	0	0	0	0	0	0	0	0	0	0	0	0
DNA1_Mam	0	0	0	3	1	0	0	0	0	0	0	1	0	0	0	0	0	2	0	0	0	1	0	0	0	0	3	0	0	1	0	0	0	0	0	1	0	0	0	0	0	3	0	1	0	0	0	4	0
ERV3-16A3_I-int	40	58	49	17	35	15	14	33	16	22	27	67	77	49	52	38	45	84	46	42	29	44	19	38	5	25	5	22	28	16	7	8	22	3	19	8	18	12	14	5	18	28	6	10	24	15	17	34	58
ERV3-16A3_LTR	9	2	0	2	2	4	1	5	8	7	4	6	10	1	16	6	14	16	7	15	18	15	5	19	7	2	0	2	5	3	10	2	3	0	4	2	6	4	8	3	2	2	5	2	3	11	20	13	23
ERVB2_1-I_MM-int	0	3	3	17	0	3	1	0	1	1	12	6	4	2	0	0	4	5	5	1	1	3	1	1	3	2	0	4	2	4	2	4	2	1	6	0	0	4	0	2	5	2	0	4	0	0	8	7	3
ERVB2_1A-I_MM-int	13	19	10	5	4	12	8	9	6	8	14	13	39	12	17	14	16	35	21	14	22	23	9	15	7	12	9	6	4	21	8	11	10	5	11	6	8	5	8	12	12	15	10	19	26	23	12	24	92
ERVB3_1-I_MM-int	16	30	11	7	15	24	11	21	27	25	16	59	45	1	22	30	38	20	55	77	37	22	13	50	22	20	29	16	23	26	9	18	16	8	20	8	17	14	11	18	25	24	42	31	32	29	11	15	181
ERVB3_1-LTR_MM	1	0	5	4	2	12	1	1	2	1	5	4	10	1	2	4	6	13	3	1	1	4	0	3	9	8	9	1	0	2	0	4	2	0	3	3	1	0	3	0	5	3	3	3	1	3	1	15	11
ERVB4_1-I_MM-int	28	27	12	16	16	27	33	19	18	16	11	33	11	4	11	23	38	13	23	40	34	16	12	49	24	40	24	12	17	23	14	38	12	11	41	23	38	23	23	36	23	62	19	28	27	19	45	50	49
ERVB4_1-LTR_MM	0	0	0	0	0	0	0	0	0	0	0	0	0	0	0	0	0	0	0	0	0	0	0	0	0	0	0	0	0	0	0	0	0	0	0	0	0	0	0	0	0	0	0	0	0	0	0	1	0
ERVB4_1B-I_MM-int	136	235	218	236	295	136	216	240	176	268	322	353	456	104	222	181	328	201	253	228	221	198	130	329	161	238	187	188	226	202	227	184	192	112	228	167	112	112	107	115	185	262	132	184	176	179	358	292	243
ERVB4_1B-LTR_MM	180	247	207	145	205	106	152	200	153	198	292	306	292	109	258	168	233	191	154	286	222	184	123	292	185	257	195	184	196	148	178	238	174	112	178	167	223	145	94	176	184	304	198	365	244	240	250	307	200
ERVB4_1C-LTR_Mm	72	74	72	94	85	36	66	74	51	91	102	133	133	22	58	41	121	58	56	60	31	54	30	105	49	80	59	82	98	90	76	59	56	31	84	33	39	35	28	33	58	49	17	40	50	34	106	90	96
ERVB4_2-I_MM-int	31	10	18	15	14	8	7	10	11	6	38	11	42	5	15	19	27	13	12	11	36	34	4	17	24	13	9	13	18	2	10	17	8	11	15	11	17	3	10	27	13	37	8	18	48	26	46	50	41
ERVB4_2-LTR_MM	3	1	1	3	0	1	0	3	0	0	0	3	0	2	0	0	3	5	1	2	4	1	0	2	2	4	7	0	3	4	2	2	2	0	4	0	3	1	0	9	2	45	7	4	10	0	10	4	128
ERVB4_3-I_MM-int	0	0	0	0	0	0	0	1	0	0	0	4	12	0	0	2	2	6	1	0	0	6	0	0	0	13	0	0	0	0	0	0	0	0	0	0	5	0	1	1	0	12	1	1	7	0	6	2	0
ERVB4_3-LTR_MM	404	588	325	558	516	249	494	393	364	439	570	552	861	359	475	443	479	393	441	622	380	438	389	860	556	552	422	447	449	405	493	520	405	268	335	286	355	293	231	351	376	480	474	676	589	378	580	563	39
ERVB5_1-I_MM-int	8	16	10	19	15	16	12	14	24	27	18	2	13	19	21	13	30	29	15	36	33	13	10	20	28	42	34	32	9	23	19	19	24	10	54	19	9	5	17	50	54	50	9	27	10	45	38	18	87
ERVB5_1-LTR_MM	0	1	1	2	1	0	2	0	2	1	1	0	0	5	3	1	0	6	1	2	5	3	1	1	0	1	1	0	1	2	1	0	0	1	1	3	1	0	0	0	1	4	0	0	1	0	1	5	9
ERVB5_2-LTR_MM	1	4	6	1	3	2	4	5	0	7	7	5	5	10	10	4	3	18	6	7	11	6	5	5	8	5	10	6	2	6	1	4	3	8	7	0	6	1	3	9	18	14	10	7	6	14	11	5	21
ERVB7_1-LTR_MM	23	21	14	9	28	13	9	17	11	29	32	16	18	1	7	20	39	9	26	27	8	19	15	18	16	24	13	16	34	8	17	8	7	14	26	9	17	10	10	12	36	30	10	21	21	30	28	27	82
ERVB7_2-LTR_MM	44	65	41	64	39	37	48	65	36	34	28	44	82	33	77	55	81	65	57	50	87	60	52	90	43	40	40	22	24	23	32	26	24	21	29	30	54	32	31	68	57	79	58	60	59	93	47	52	107
ERVB7_2B-LTR_MM	10	11	1	3	13	14	6	9	10	7	9	14	19	12	5	17	22	31	12	15	13	17	8	10	9	8	7	11	8	7	10	14	10	8	9	8	6	7	3	14	11	14	7	13	21	9	18	12	88
ERVB7_3-LTR_MM	5	3	7	7	10	32	3	7	3	12	9	9	4	2	5	10	19	28	4	11	10	7	10	7	7	11	10	11	4	12	8	8	4	3	8	1	5	12	1	8	5	11	2	12	4	11	4	22	11
ERVB7_4-LTR_MM	3	0	2	6	7	21	6	0	6	5	5	3	6	1	0	2	15	11	5	2	6	2	1	7	3	1	7	3	1	7	7	11	2	4	4	1	3	6	0	3	2	10	3	9	4	0	0	29	7
ERVL-B4-int	16	52	25	12	25	27	33	28	14	30	31	34	56	13	34	17	65	73	25	31	17	28	20	36	55	26	31	24	18	24	11	14	31	15	8	21	31	21	21	43	49	93	46	38	42	28	61	58	73
ERVL-E-int	132	139	74	92	92	94	123	114	98	98	121	184	136	59	112	69	114	132	61	111	149	134	83	205	249	258	218	153	282	78	234	187	141	79	144	95	119	71	89	97	235	346	209	224	261	140	176	154	60
ERVL-int	2	1	12	0	0	6	5	1	3	6	3	10	16	1	15	0	7	9	21	7	3	0	5	0	7	7	4	0	0	5	14	1	5	0	6	2	0	3	2	6	5	12	2	2	1	1	7	10	1
ETnERV-int	3	16	20	3	24	24	15	17	23	16	43	22	9	3	9	14	21	46	45	39	30	35	30	40	23	26	23	25	26	9	8	10	13	12	14	8	15	19	11	19	31	26	11	21	18	19	20	48	65
ETnERV2-int	99	73	102	92	77	94	94	99	67	104	129	150	137	58	71	71	126	100	90	135	91	82	79	159	106	182	176	65	109	102	79	99	76	70	157	68	96	54	53	86	90	171	139	141	117	138	194	237	53
ETnERV3-int	38	64	30	39	43	36	55	41	16	46	72	57	64	39	29	27	59	40	77	63	58	100	44	59	34	44	40	18	52	26	28	31	25	29	53	32	55	23	29	30	58	33	46	25	27	66	83	56	217
Eulor1	0	0	0	0	0	0	0	0	0	0	0	0	0	0	0	0	1	1	0	0	0	0	0	0	0	0	0	0	0	0	0	1	0	0	0	0	0	1	0	0	0	0	1	0	2	0	1	0	0
Eulor10	2	3	1	6	1	0	2	1	1	3	6	5	5	3	3	1	3	5	2	5	3	3	0	4	2	7	0	4	3	3	3	1	2	0	2	3	5	2	1	1	4	2	3	1	3	6	1	1	2
Eulor11	0	0	0	0	0	0	0	0	0	0	0	0	0	0	1	0	0	0	1	0	0	0	0	0	0	0	0	2	0	0	0	0	4	0	0	0	0	0	0	0	0	0	3	0	3	2	0	1	0
Eulor12	0	0	0	0	0	0	0	0	0	0	0	0	0	0	0	0	1	1	0	0	0	0	0	1	0	0	0	0	0	0	0	0	0	0	0	0	0	0	0	0	0	0	0	0	0	0	0	1	0
Eulor2A	6	0	0	0	0	1	0	0	0	0	0	2	0	1	0	1	0	0	0	1	0	2	0	0	1	0	0	0	0	0	0	0	0	0	1	0	2	0	0	0	2	0	1	0	1	1	0	1	13
Eulor2B	90	90	44	96	68	31	55	45	57	74	89	130	114	49	69	71	70	86	36	91	59	71	47	118	88	105	44	46	63	53	61	36	49	17	44	30	49	49	20	39	60	77	58	58	87	92	53	49	51
Eulor2C	0	0	0	0	0	0	0	0	0	0	0	0	0	0	0	0	0	0	0	0	0	0	0	0	0	0	0	0	0	0	0	0	0	0	0	0	0	0	0	0	0	0	0	0	0	1	0	1	0
Eulor3	0	1	0	0	0	0	0	0	1	0	0	0	0	0	0	0	0	1	0	1	0	2	0	0	1	1	0	0	0	0	0	0	0	0	0	0	0	0	0	0	1	1	0	0	0	0	0	0	1
Eulor4	0	0	0	0	0	0	0	0	0	0	0	0	0	0	0	0	0	0	0	0	0	0	0	0	0	0	0	0	0	0	0	0	0	0	0	0	0	0	0	0	0	0	0	0	0	0	0	1	0
Eulor5A	85	112	86	111	79	58	82	76	65	91	71	105	145	96	131	97	126	144	58	100	94	88	90	138	93	87	93	66	70	55	67	44	45	31	47	34	88	52	33	51	79	105	131	78	92	91	106	92	91
Eulor5B	0	2	0	0	2	1	0	2	2	2	5	2	3	5	5	8	4	5	1	2	5	2	1	1	2	0	1	0	4	4	0	0	1	1	4	3	5	0	8	0	0	10	1	1	6	0	13	0	0
Eulor6A	0	0	0	0	0	0	0	0	0	0	0	0	0	0	0	0	0	0	0	0	0	0	0	0	0	0	0	0	0	0	0	0	0	0	0	0	0	0	0	0	0	0	0	0	0	0	0	0	0
Eulor6B	0	3	2	3	6	0	5	4	1	4	10	14	11	3	1	12	4	7	8	9	5	7	2	8	3	4	3	5	1	6	1	4	0	2	5	3	0	4	0	2	4	1	8	7	4	12	4	0	0
Eulor6C	3	1	1	0	2	0	3	1	3	2	2	2	6	0	2	0	7	0	1	3	0	3	9	1	10	5	2	2	6	3	9	0	0	1	1	2	5	0	2	0	1	4	1	3	0	6	4	8	0
Eulor6D	0	0	0	0	0	0	0	0	0	0	0	0	4	0	0	0	1	1	0	0	1	0	0	4	0	6	1	0	0	0	0	0	0	0	0	0	3	0	0	0	0	0	0	0	0	0	0	2	0
Eulor6E	0	0	0	0	0	0	0	0	0	0	0	0	0	0	0	0	0	0	0	0	0	0	0	0	0	0	0	0	0	0	0	0	0	0	0	2	0	0	0	0	0	0	0	0	0	0	0	0	0
Eulor8	8	14	7	1	1	6	5	7	2	13	0	0	10	9	5	2	8	9	4	8	2	3	2	9	3	7	6	4	5	9	2	9	7	0	3	0	4	2	7	5	5	7	15	15	2	16	1	3	9
Eulor9A	0	0	0	0	0	3	0	0	0	0	0	0	0	0	0	0	5	1	0	0	0	0	0	0	0	0	0	0	0	0	0	0	0	0	0	0	0	0	1	0	0	0	0	0	0	0	0	4	0
Eulor9C	0	0	0	0	0	0	0	0	0	0	0	0	0	0	0	0	1	0	0	2	0	0	0	0	0	0	0	0	0	0	0	0	1	0	0	0	1	0	0	0	0	0	0	0	0	0	0	0	0
FAM	51	34	18	24	80	31	68	66	61	71	112	139	74	22	32	22	40	19	36	80	66	65	64	113	76	75	74	100	80	75	67	85	48	32	59	37	81	51	38	48	69	96	68	69	50	67	48	76	22
FordPrefect	0	3	20	0	9	7	1	3	6	12	4	7	12	10	1	6	57	33	8	11	16	12	3	8	1	8	9	9	3	10	3	4	3	0	6	12	2	4	2	1	8	12	8	7	0	10	1	11	65
FordPrefect_a	0	0	0	0	0	0	0	0	0	0	0	0	0	0	0	0	0	1	0	0	0	0	3	0	0	0	0	0	0	0	0	0	0	0	0	0	0	0	0	0	0	0	0	0	0	0	0	0	0
G-rich	1789	2365	1783	1708	1526	1011	1539	1909	1347	2070	1905	2382	2798	1343	2001	1667	1949	1807	1761	2030	1858	1534	1223	2697	2043	2765	2102	1481	2046	1580	1711	1950	1587	1067	2079	1418	1460	877	898	1722	1551	2967	1789	2022	2007	2162	2440	2084	895
GA-rich	5062	7837	5929	5855	5515	4885	6688	9029	6705	8583	8219	9377	8232	4079	6277	5709	6197	5460	6242	8344	9560	6336	5350	12613	9466	13155	11195	6966	8507	7743	6822	8695	7188	5462	10276	6892	7194	3301	4586	8878	7254	14056	11029	11483	8428	11639	11386	9894	3861
GC_rich	568	620	549	447	393	315	426	478	374	567	614	724	689	421	737	624	704	741	606	729	799	471	568	971	494	645	540	451	482	446	501	485	457	379	459	486	430	321	337	484	540	760	627	587	390	518	626	627	477
GSAT_MM	4	5	9	5	1	99	2	5	5	1	3	1	7	9	6	7	369	224	2	1	13	2	2	9	4	2	3	2	5	5	0	0	0	0	3	2	5	4	1	9	32	30	53	23	23	5	5	276	140
HAL1	204	256	519	186	372	307	281	282	299	456	566	776	613	226	607	458	667	569	709	742	908	444	253	709	190	370	246	169	237	292	270	400	244	189	394	246	235	218	160	371	322	360	318	285	315	298	507	824	182
HAL1M8	10	3	18	11	9	8	3	5	6	5	21	15	14	16	31	11	23	18	17	10	20	19	18	35	0	3	14	7	4	2	16	19	7	3	12	6	10	6	5	1	8	2	19	20	7	24	17	36	23
HAL1ME	66	99	85	84	106	66	117	105	106	119	170	103	209	77	96	120	143	101	130	122	119	152	105	189	216	266	224	83	183	91	68	125	84	63	116	88	135	74	49	122	158	328	168	175	171	132	182	186	380
HAL1_SS	5	2	5	3	8	9	9	10	8	18	20	14	11	4	6	1	5	3	11	34	47	20	13	36	11	25	5	7	15	21	16	53	28	19	42	22	18	9	8	22	10	24	45	22	11	26	45	32	6
HAL1b	58	77	71	80	51	49	75	63	60	87	116	127	148	54	78	81	128	87	140	152	111	65	33	118	67	117	69	38	71	96	75	103	79	56	94	112	69	36	33	87	61	92	106	122	94	89	92	105	9
HERV16-int	0	0	4	0	0	3	0	0	2	0	2	4	7	2	5	0	8	9	2	0	1	0	2	2	3	3	3	1	2	0	2	3	1	1	1	8	1	1	3	0	3	5	7	2	0	1	3	5	1
HERVL40-int	284	258	436	144	128	126	143	167	144	274	220	202	606	486	892	938	874	758	965	556	455	397	339	470	181	208	137	88	94	119	195	142	169	112	199	85	211	87	116	243	272	578	379	195	307	220	220	233	1885
HERVL74-int	0	0	2	1	2	4	10	0	4	0	0	0	2	0	0	1	5	9	1	3	5	2	5	4	0	0	1	4	8	2	0	1	0	1	1	0	0	3	0	2	0	0	0	0	4	0	0	5	0
HY1	0	0	0	0	0	0	0	0	0	0	0	0	0	0	0	0	0	0	0	0	0	0	0	1	0	0	0	0	0	0	0	0	0	0	0	0	0	0	0	0	0	0	0	0	0	0	0	0	5
HY3	0	0	0	0	0	0	0	0	0	0	0	0	0	0	0	0	1	1	0	0	0	0	0	0	0	0	0	0	0	0	0	0	0	0	0	0	0	0	0	0	0	0	0	0	0	0	0	1	0
HY4	0	0	0	0	0	0	0	0	0	0	1	0	0	0	0	0	0	0	0	0	0	0	0	0	0	0	0	0	0	0	0	0	0	0	0	0	0	0	0	0	0	0	0	0	0	0	0	0	0
Helitron1Na_Mam	0	0	10	0	0	0	3	2	1	1	1	1	2	0	0	0	0	3	0	3	0	0	1	4	0	2	1	1	0	2	2	0	0	0	3	0	3	0	1	1	0	0	0	0	6	1	2	0	0
Helitron1Nb_Mam	1	4	4	7	3	0	1	0	5	1	5	2	1	0	0	0	1	4	0	0	7	0	3	4	0	10	0	0	3	5	1	4	2	0	4	0	6	0	2	0	0	16	3	3	2	6	8	6	0
Helitron2Na_Mam	4	1	0	1	0	1	0	0	0	1	7	0	0	3	5	0	1	5	0	0	0	0	0	1	1	0	0	0	0	0	0	0	3	0	0	0	0	0	0	0	0	1	0	1	2	1	0	2	1
Helitron3Na_Mam	7	1	8	16	6	10	8	11	21	6	9	10	19	4	7	2	5	6	11	9	4	2	7	5	15	19	10	5	8	4	1	10	10	6	3	7	3	3	1	9	7	28	17	8	13	4	9	13	2
IAP-d-int	119	310	341	178	329	196	195	174	149	245	200	425	111	168	249	175	475	335	287	560	417	340	314	502	226	166	196	142	235	209	221	286	236	158	171	121	221	178	186	417	794	293	249	546	387	412	679	659	85
IAP1-MM_I-int	134	451	299	132	131	232	226	390	318	339	365	264	350	146	209	214	210	262	357	323	385	203	137	513	221	658	399	167	256	432	171	458	231	216	573	316	231	91	159	337	188	574	359	315	339	561	770	549	118
IAP1-MM_LTR	0	6	0	0	1	3	0	3	1	1	3	1	2	0	0	0	3	4	1	0	1	1	1	4	1	1	2	1	0	0	2	1	1	2	1	0	1	2	1	0	1	6	0	1	3	2	2	2	23
IAPA_MM-int	0	0	0	1	0	0	0	0	0	0	0	0	0	0	0	0	1	0	0	0	0	0	0	0	0	0	0	0	0	0	0	0	0	0	0	0	0	0	0	0	0	0	0	0	0	0	0	1	0
IAPEY2_LTR	25	24	30	28	33	9	23	12	18	15	25	13	15	8	26	39	31	26	23	10	11	22	26	28	27	32	16	34	28	44	17	14	26	8	21	11	21	2	8	15	21	28	12	24	10	11	26	27	91
IAPEY3-int	48	77	61	83	104	40	107	112	57	83	109	171	49	17	46	69	68	83	36	41	40	66	45	124	88	108	60	66	119	94	127	34	93	32	51	50	85	33	29	37	76	80	64	57	64	44	63	93	96
IAPEY3C_LTR	2	10	9	4	20	9	6	6	21	5	13	14	11	5	10	2	2	12	11	10	13	13	9	23	5	27	7	5	16	5	8	9	14	2	22	4	9	7	11	5	14	23	10	15	19	5	12	28	58
IAPEY3_LTR	3	1	0	2	6	3	5	9	4	4	13	5	5	0	3	6	17	16	3	2	5	9	3	7	8	4	6	0	13	3	14	1	5	2	6	2	11	5	1	8	9	12	9	6	3	12	14	8	20
IAPEY4_I-int	0	2	0	0	0	6	0	2	2	2	1	0	1	2	0	0	24	15	0	0	0	0	0	1	0	0	2	0	0	1	1	1	0	0	1	1	1	0	1	2	2	3	2	0	1	4	2	6	11
IAPEY4_LTR	3	10	0	0	0	8	1	1	0	1	1	3	0	0	1	0	8	2	2	1	3	0	1	0	2	0	0	2	5	3	0	0	1	0	1	0	0	0	0	0	3	1	1	2	0	1	2	2	7
IAPEY5_I-int	0	6	6	20	17	11	20	7	9	9	8	29	4	0	0	4	6	0	0	6	5	1	6	11	8	25	6	13	41	9	25	11	1	12	14	5	4	0	14	11	15	0	5	16	3	1	18	18	0
IAPEY5_LTR	27	20	16	24	45	19	36	41	32	48	45	68	23	4	10	22	19	11	16	28	36	18	21	60	49	79	59	23	59	38	32	44	20	22	52	19	28	14	23	28	28	42	15	36	35	28	43	38	11
IAPEY_LTR	30	13	12	11	19	8	18	21	15	24	16	14	38	24	36	20	32	28	21	34	19	21	39	48	18	21	17	17	19	5	15	18	10	4	7	3	30	26	12	20	33	27	21	43	25	46	38	48	5
IAPEy-int	0	0	1	2	2	1	0	4	3	8	0	7	5	2	2	4	3	12	8	9	4	12	7	11	3	1	9	7	9	8	0	1	1	1	3	0	11	2	0	1	5	2	5	13	13	2	3	19	22
IAPEz-int	0	1	6	0	12	13	8	22	6	7	4	19	0	1	6	5	16	27	2	2	1	1	6	4	3	21	8	3	11	4	4	4	13	2	6	4	2	0	1	5	9	21	6	4	2	9	1	17	58
IAPLTR1_Mm	0	2	1	0	0	0	0	1	2	1	1	0	0	0	0	0	3	4	0	0	0	0	0	1	0	0	0	0	0	2	0	0	0	0	0	0	0	0	0	0	0	4	0	0	0	0	1	2	8
IAPLTR1a_Mm	80	100	80	65	81	54	82	91	42	58	62	92	110	62	102	83	114	99	145	107	125	57	67	111	93	67	59	72	114	71	90	70	94	34	70	32	94	68	60	80	112	188	125	88	98	57	82	92	98
IAPLTR2_Mm	1	1	0	2	14	10	2	6	4	0	7	8	2	0	3	2	4	2	1	1	2	0	1	1	3	2	0	3	2	2	3	2	3	7	2	2	2	3	0	0	4	6	0	1	4	1	4	5	23
IAPLTR2a	2	1	6	1	7	4	3	6	3	4	2	7	0	0	1	0	2	4	2	0	1	1	1	2	2	5	1	1	1	4	2	1	2	2	4	4	1	8	0	0	6	7	1	3	1	3	2	10	26
IAPLTR2a2_Mm	40	60	39	32	126	65	73	90	87	88	95	100	50	40	85	39	47	58	52	120	106	94	131	201	56	101	53	73	102	47	77	71	65	63	58	47	108	87	55	91	82	171	149	98	88	137	131	227	398
IAPLTR2b	13	5	11	7	24	5	5	9	11	13	8	4	7	0	43	5	39	45	35	7	7	29	19	8	9	8	13	8	7	2	6	12	4	13	8	2	11	5	2	9	7	12	8	6	3	13	15	62	12
IAPLTR3	7	3	1	10	0	6	6	6	6	16	3	12	1	2	6	0	7	12	3	6	4	2	1	6	1	16	7	4	5	10	9	8	4	12	14	1	7	7	4	6	6	3	6	13	2	6	2	2	2
IAPLTR3-int	2	2	4	5	7	4	0	2	5	3	3	0	0	1	1	11	5	8	10	4	2	4	0	7	3	1	0	1	1	0	2	1	3	1	1	0	1	0	1	0	5	1	2	7	1	4	3	7	22
IAPLTR4	0	2	1	0	0	2	0	0	0	0	1	4	2	0	2	1	3	1	3	2	0	0	0	3	1	0	2	1	1	3	0	4	0	0	1	2	0	0	0	0	0	1	0	0	1	5	0	2	9
IAPLTR4_I	0	0	0	1	0	3	8	15	0	0	5	10	8	0	0	1	0	1	1	0	0	4	2	3	4	3	0	1	3	8	2	0	3	2	0	3	2	0	0	3	2	1	0	1	5	0	0	2	0
ID	446	613	527	523	528	275	430	557	416	532	654	810	1017	466	613	488	646	593	656	715	611	503	465	899	614	753	622	566	667	492	511	524	450	296	632	386	482	318	297	562	576	894	709	794	639	800	746	740	360
ID2	1499	2006	1312	1500	1817	927	1379	1713	1167	1702	1613	1921	1778	1274	1662	1267	1729	1659	1269	1951	1539	1591	1632	2733	2101	2089	1656	1670	2124	1428	1981	1367	1442	914	1379	1208	1615	1127	712	1315	1699	2543	1756	1828	2117	1785	1751	2054	744
ID4	3100	3523	3511	3035	2921	1726	2227	2814	2077	3078	4093	5172	5862	3107	4835	3979	5096	4405	5547	4602	3576	3670	3220	5470	2530	3016	2397	2028	2578	2794	2398	2369	2203	1314	2594	1709	2328	1681	1412	2401	2790	4212	2967	2949	3332	3327	3206	3655	2238
ID4_	3530	4085	2730	3557	2989	1803	2735	3410	2512	3226	4077	5350	5701	2889	4072	3541	4241	3782	3819	4333	3229	3296	2794	5574	3312	3503	2737	2498	3251	3157	2646	2681	2599	1621	2596	2052	2641	1860	1562	2508	2690	4101	2974	3339	3283	3996	3231	3395	2176
ID_B1	17122	20285	16851	17261	15107	9998	13578	16504	12876	17760	20201	25352	29742	15212	22010	18717	25035	21617	20833	21876	18128	16682	13532	28108	16979	20641	16459	12851	16991	15033	13823	15169	13090	8779	15780	11213	14080	9708	8251	14701	14974	25543	17404	18281	17778	19983	20716	21848	13239
IMPB_01	639	812	890	575	771	577	554	616	521	814	920	1192	1349	868	1382	1021	1348	1482	1214	1278	1045	977	819	1620	800	980	740	514	707	609	668	717	668	415	804	563	701	490	363	661	808	1402	893	878	919	956	1166	1354	920
Kanga1	24	28	18	16	19	5	22	29	19	19	25	40	62	33	27	26	50	32	38	19	16	28	26	39	25	40	22	18	15	22	14	19	12	13	21	5	7	10	5	11	10	26	12	26	14	22	17	32	20
Kanga11a	7	21	5	2	7	10	7	4	11	12	10	4	10	8	10	2	15	16	9	6	23	17	4	20	8	13	2	4	1	7	10	8	3	1	6	5	5	7	8	7	5	19	8	15	19	22	18	23	4
Kanga1a	5	0	2	0	0	3	4	0	0	1	2	0	3	1	5	2	2	3	2	2	3	0	1	1	0	8	3	1	0	1	0	4	0	0	3	1	2	0	0	3	0	4	2	2	1	0	4	1	0
Kanga1b	0	0	1	0	0	0	0	0	0	0	0	0	0	0	0	0	4	2	0	0	0	0	0	0	0	0	0	0	0	0	0	0	0	0	0	0	0	0	0	0	0	0	1	0	0	1	0	2	0
Kanga1c	3	3	5	2	2	2	2	2	6	7	4	5	4	3	11	11	2	14	1	8	8	9	2	4	5	0	2	1	2	5	3	5	0	1	2	0	0	3	0	1	3	0	0	7	2	4	2	10	14
Kanga1d	0	2	0	2	5	0	0	1	0	1	0	2	0	2	3	2	3	4	0	2	0	0	1	1	0	0	0	1	0	1	0	1	0	0	1	1	0	0	0	2	0	17	0	2	0	0	5	1	23
Kanga2_a	2	3	5	3	7	7	3	1	0	1	5	0	0	1	4	5	7	11	6	1	5	6	0	1	5	6	6	5	0	9	6	3	4	1	4	0	4	0	1	3	2	3	0	3	3	0	2	8	8
L1M	18	15	7	13	11	8	5	6	5	4	14	9	14	8	12	11	18	12	15	14	21	11	6	13	9	6	8	5	4	9	7	13	15	10	15	3	13	8	6	8	10	21	9	13	9	12	15	15	16
L1M1	1	4	5	1	7	5	3	2	3	1	1	0	4	5	6	8	16	11	6	7	6	12	1	15	1	3	5	1	6	4	3	2	3	4	7	2	3	3	3	1	8	8	2	6	1	7	5	10	11
L1M2	713	816	767	566	421	386	439	506	422	686	781	745	1366	705	928	794	1205	1080	1065	780	680	748	575	892	546	752	555	345	506	696	431	552	499	342	662	418	491	276	288	515	696	1017	744	640	676	775	998	1018	937
L1M2a	0	0	0	0	1	0	0	0	0	2	1	0	0	0	0	0	2	3	0	1	0	0	4	2	0	0	0	0	0	0	0	0	0	2	1	1	0	0	1	0	1	0	0	1	0	0	0	2	2
L1M2a1	0	0	0	0	0	0	0	0	0	0	0	0	0	0	0	0	0	1	0	0	0	0	0	0	0	0	0	0	0	0	0	0	0	0	0	0	0	0	0	0	0	0	1	0	0	0	0	0	0
L1M2b	3	16	17	6	4	5	6	8	15	14	3	4	25	2	8	2	9	14	32	21	8	19	16	21	6	11	25	4	8	9	6	8	5	5	16	2	3	5	6	25	13	63	18	23	9	25	11	14	42
L1M2c	4	26	0	0	0	12	1	3	3	1	2	3	2	1	0	1	10	10	0	2	1	9	0	4	1	5	0	3	0	1	5	0	2	1	0	10	3	0	0	8	4	0	2	8	4	3	8	15	7
L1M3	675	901	710	711	695	344	474	529	535	738	868	1035	1443	701	999	834	1205	976	906	988	629	745	576	1201	626	863	573	525	707	680	521	574	467	283	503	368	490	365	309	469	705	866	545	727	821	720	687	904	1074
L1M3a	0	0	0	1	0	0	0	0	0	0	0	0	0	0	0	2	1	2	0	0	0	0	0	1	0	0	0	0	0	1	0	0	0	0	0	0	0	0	0	0	0	0	0	0	0	0	1	4	0
L1M3b	0	0	0	0	0	0	0	0	0	0	0	0	0	0	0	0	4	5	0	0	0	0	0	0	0	0	0	0	0	0	0	0	0	0	0	6	0	0	0	0	0	0	1	1	0	0	0	4	0
L1M3c	2	4	5	3	2	1	0	1	0	1	3	1	0	0	0	2	4	9	4	4	0	0	3	2	2	1	0	1	0	0	0	1	8	0	1	0	0	4	2	0	4	2	4	4	0	4	0	4	22
L1M3d	7	5	1	6	6	4	9	5	3	7	3	10	13	5	9	6	28	11	8	6	1	4	7	7	2	7	4	2	1	6	3	2	8	5	5	0	4	0	0	4	2	3	0	12	4	2	0	11	0
L1M3de	89	82	64	88	75	36	48	68	56	79	147	148	144	66	99	100	149	93	138	99	44	46	56	69	70	134	58	75	111	91	107	90	46	40	80	75	59	36	32	50	76	98	55	110	70	56	83	46	46
L1M3e	44	56	54	52	52	47	61	78	76	55	73	98	84	43	55	64	92	53	89	98	50	66	32	79	77	59	51	31	33	48	50	25	18	29	52	31	34	24	20	52	24	101	53	52	44	27	63	54	66
L1M3f	0	0	1	0	0	0	0	0	0	0	0	0	0	0	0	0	0	0	0	0	1	0	0	3	0	1	2	0	0	0	0	1	3	0	0	0	0	2	0	0	0	1	0	0	2	0	0	1	5
L1M4	847	887	986	938	890	589	615	811	686	987	1263	1310	2073	988	1427	1124	1674	1514	1400	1425	1074	962	874	1713	622	966	667	599	726	962	622	861	660	535	975	579	728	454	411	715	715	1142	813	908	816	1001	1352	1376	810
L1M4a1	102	211	104	257	216	65	161	149	156	169	265	198	228	130	236	174	150	98	101	128	70	123	86	243	110	117	103	61	64	63	80	103	136	59	87	69	72	49	55	76	69	60	36	100	111	109	287	121	20
L1M4a2	39	16	32	16	21	18	23	26	28	27	51	52	35	22	33	22	90	30	50	56	21	39	37	62	44	26	28	34	45	26	25	34	22	18	24	25	25	40	8	26	35	34	22	28	34	48	51	44	37
L1M4b	152	195	282	183	199	141	101	156	138	281	217	255	305	142	362	270	376	389	301	348	266	256	191	348	133	245	129	121	106	211	197	193	210	98	174	202	206	123	113	276	219	339	281	293	198	340	413	494	178
L1M4c	35	42	74	57	28	30	24	30	87	47	71	42	56	55	97	75	139	99	95	61	57	58	58	73	29	49	74	30	26	26	51	58	57	31	69	47	19	16	15	50	38	55	66	41	56	67	74	94	151
L1M5	2168	2310	2452	1968	1593	1232	1262	1458	1121	1649	2076	3106	2845	1390	2782	2183	3078	2238	2342	1917	1647	1663	1580	2702	920	1035	816	955	1126	1983	1151	1233	883	627	1100	825	1103	773	515	791	845	1584	989	935	1063	1278	1754	1863	685
L1M6	2	4	4	6	5	6	0	3	3	1	1	3	7	6	7	2	21	11	11	1	2	5	4	10	4	7	5	0	1	3	2	6	4	3	4	0	4	0	0	1	3	2	5	7	9	3	3	5	4
L1M6B	3	3	2	15	10	0	6	5	2	2	4	5	28	9	24	14	25	11	5	35	14	7	12	25	6	0	0	5	15	9	6	8	2	2	8	0	10	5	4	4	2	14	5	3	7	5	5	25	0
L1M7	7	4	10	15	14	17	9	9	3	23	18	29	22	15	18	11	10	15	36	26	29	24	13	24	4	10	10	9	4	14	13	19	18	7	21	18	11	12	11	11	9	29	20	11	11	12	18	33	0
L1M8	0	0	0	0	0	0	0	2	0	0	2	0	0	1	0	0	2	12	0	4	0	1	0	5	0	0	0	0	0	0	0	0	0	0	1	1	2	1	0	1	3	0	0	0	0	1	3	12	0
L1MA10	21	25	9	17	10	3	9	15	8	7	17	12	19	12	11	15	24	33	5	10	19	10	8	20	4	17	16	6	3	9	7	7	13	7	6	10	6	3	7	16	10	14	18	7	15	8	14	21	17
L1MA4	826	764	959	602	924	435	393	461	455	775	1117	1263	1618	942	1745	1183	1708	1426	1485	1362	865	1216	939	1442	357	388	307	519	348	977	793	745	586	377	724	490	721	545	313	505	521	930	590	730	588	782	927	1469	460
L1MA4A	34	23	29	35	16	18	38	35	25	34	16	29	30	44	27	17	73	87	77	46	37	16	27	49	32	27	28	15	17	31	24	22	16	15	25	12	17	10	6	27	43	32	20	27	21	29	65	105	26
L1MA5	153	215	223	149	109	91	114	137	125	130	216	210	401	233	276	240	441	330	312	262	197	197	168	238	132	137	96	81	93	148	116	126	121	65	101	111	122	73	47	89	101	148	143	167	163	161	173	321	98
L1MA5A	562	1471	377	505	132	110	258	253	204	301	1193	487	796	507	611	612	479	962	499	473	298	284	244	311	679	597	371	264	402	2176	1043	962	770	550	488	325	754	383	413	853	651	1103	881	795	934	1319	1823	966	189
L1MA6	2226	2528	1841	1801	1717	784	1548	1748	1425	2193	2352	2882	2862	1317	1930	2035	2588	2035	1943	1894	1246	1183	1317	2260	1708	2745	2138	1272	2015	1833	1772	1892	1624	1036	1979	1336	817	654	476	1135	1137	2052	1531	1462	1771	1607	2034	1834	1549
L1MA7	96	84	61	77	66	52	42	76	35	54	73	104	133	78	105	128	149	141	131	95	69	81	74	103	48	65	49	53	32	64	68	63	61	44	64	37	51	44	25	34	55	89	46	47	41	58	97	123	94
L1MA8	643	855	619	723	436	300	462	449	377	500	586	650	1222	604	746	638	876	773	690	646	519	478	378	1045	694	763	665	426	637	753	560	589	435	341	538	367	378	353	251	456	379	762	627	582	434	724	773	802	394
L1MA9	218	246	195	162	176	112	121	206	114	235	226	267	356	172	268	219	335	256	224	188	142	219	169	255	128	134	105	82	83	195	95	128	84	83	125	96	103	68	58	91	77	179	101	66	128	159	164	213	59
L1MB1	113	136	238	111	174	157	139	155	131	238	264	287	259	79	183	233	219	163	171	289	252	147	113	365	133	138	129	104	143	149	178	179	161	121	182	120	115	102	69	127	122	296	191	221	319	190	244	299	138
L1MB2	394	597	785	536	894	571	508	467	445	632	753	1181	1005	605	1087	902	1054	926	948	1250	1018	804	664	1260	605	551	556	623	624	747	740	696	568	374	804	467	854	679	456	844	1023	1499	1134	1197	1015	805	988	1367	802
L1MB3	1571	2523	1732	2165	1607	1036	1346	1845	1178	1537	2193	2638	2937	1524	1924	1541	2237	1959	2165	2408	1766	1500	1371	2874	1699	2277	1725	1363	1854	2261	1680	1833	1793	1179	1800	1500	1384	843	732	1598	1088	2251	1857	1736	1629	2140	2089	2187	1030
L1MB4	34	61	220	50	73	68	32	37	33	72	87	99	181	121	194	244	286	307	405	166	156	137	159	142	41	119	51	41	57	95	36	57	53	25	114	59	55	49	18	74	98	114	120	55	78	100	100	146	78
L1MB5	1136	1039	1304	1160	1113	691	913	1156	904	1066	1503	1521	2304	1270	1637	1525	2215	1334	2077	2042	1471	1505	1322	2228	892	1163	1271	812	1100	1402	868	934	910	586	1293	909	1161	820	746	1302	1070	1935	1421	1305	1490	1557	1234	1859	1004
L1MB7	1709	1870	1857	1529	1425	770	1215	1464	1074	1442	2134	2409	3516	1945	2300	1955	2735	2208	2194	2321	1446	1677	1438	2637	1422	1768	1342	1089	1422	1715	1155	1228	1111	795	1163	929	1195	730	612	1106	902	1948	1494	1422	1466	1673	1806	2030	745
L1MB8	1806	1475	1621	2079	2277	1000	1300	1350	1317	1864	2145	2607	4402	3238	4633	2991	3876	3982	3376	4598	3138	3018	3243	5136	1368	1296	988	1370	1374	1796	1465	1575	1626	822	1394	1192	2239	1909	898	1704	2242	2797	2735	2491	2347	3237	3282	4353	978
L1MC	194	256	197	217	231	144	214	230	171	244	275	331	498	240	288	235	293	301	305	326	246	283	179	415	233	259	201	168	271	199	184	228	180	119	206	157	223	108	119	162	150	253	262	283	280	292	314	371	130
L1MC1	593	703	1127	693	895	652	595	737	577	1015	1260	1633	1753	989	1613	1624	1817	1717	2198	1575	1380	1700	1031	1983	617	874	592	660	570	824	711	598	769	458	845	550	715	655	436	750	969	1249	868	982	753	1164	1170	1705	546
L1MC2	422	532	451	429	264	207	287	405	268	429	470	451	882	371	486	450	608	441	644	467	366	325	243	664	348	525	320	249	357	437	251	355	249	170	467	219	198	139	145	294	212	397	353	337	459	440	524	382	208
L1MC3	244	280	198	242	209	187	187	182	160	200	281	293	453	194	233	236	334	301	358	294	243	255	221	421	194	267	269	138	212	224	197	202	191	102	260	139	193	135	104	203	200	405	192	262	233	240	336	338	308
L1MC4	278	304	290	194	168	202	201	327	213	256	289	357	440	261	398	286	499	432	337	392	324	301	189	414	244	251	186	179	226	284	230	189	161	131	201	170	190	86	106	167	264	382	332	180	304	310	323	303	549
L1MC4a	182	128	171	75	85	62	66	89	87	109	122	124	413	289	376	289	428	409	430	183	102	127	112	182	79	94	104	54	67	77	58	86	37	49	141	56	96	59	30	91	80	141	96	116	87	155	194	203	166
L1MC5	173	126	172	144	114	68	91	119	112	129	170	124	269	134	183	180	256	231	230	198	133	151	122	225	77	128	97	73	114	150	84	98	72	57	107	60	121	54	49	55	114	165	89	105	128	173	203	230	189
L1MC5a	61	80	62	24	40	37	41	40	30	38	32	53	94	48	67	63	103	101	64	58	61	48	20	73	27	40	27	37	43	46	33	45	30	32	55	30	37	21	17	32	28	46	53	37	53	47	72	86	35
L1MCa	25	81	120	58	51	45	34	35	52	58	86	112	173	58	194	81	187	151	163	90	73	97	89	88	35	65	36	40	37	46	51	30	22	48	75	26	36	29	13	24	75	106	54	82	79	63	106	124	159
L1MCb	5	5	2	9	13	12	21	21	11	19	5	17	24	20	41	10	22	23	17	3	10	12	1	2	5	33	14	5	15	10	3	3	9	5	3	3	8	9	5	20	11	24	19	17	13	18	37	22	7
L1MCc	8	2	6	5	2	3	4	6	2	1	7	9	5	6	8	4	23	29	12	7	10	8	11	5	9	2	7	4	9	6	9	2	0	2	4	5	2	12	1	1	4	15	0	10	10	3	8	14	103
L1MD	755	764	484	661	757	303	582	946	423	435	409	496	1263	895	1044	932	1180	975	1211	1399	1061	878	1129	1372	713	509	756	601	177	647	761	659	547	302	617	350	1485	911	487	521	808	1187	767	1501	1041	1541	814	2533	353
L1MD1	132	115	161	93	97	92	92	111	97	114	151	161	415	112	243	170	265	219	251	240	226	180	165	234	172	108	121	99	116	173	110	152	114	61	109	69	179	139	70	159	222	357	189	260	182	187	250	236	288
L1MD2	234	305	284	222	211	127	204	187	195	254	359	315	436	188	349	288	339	383	312	307	309	251	180	440	276	316	240	155	233	198	212	238	179	127	231	172	249	159	110	266	235	289	283	318	292	398	397	411	390
L1MD3	68	81	72	51	41	27	42	62	68	76	68	86	109	62	82	67	101	95	124	75	61	80	51	91	42	51	50	42	40	60	32	70	44	31	78	32	38	39	23	51	61	77	62	59	48	69	94	95	134
L1MDa	48	67	51	15	58	40	35	32	35	72	90	110	91	62	90	72	137	130	92	87	55	95	51	119	37	66	30	33	34	21	36	49	46	36	71	26	39	36	24	23	38	73	58	48	47	40	78	151	97
L1MDb	0	31	44	22	21	19	15	64	55	50	61	21	37	25	72	61	45	42	34	76	56	65	22	48	38	69	71	24	23	37	17	31	31	23	58	22	57	8	29	89	29	83	86	42	36	85	40	58	16
L1ME1	1096	1177	1027	1037	835	453	775	847	672	903	1272	1404	2374	1065	1558	1262	1736	1438	1644	1412	1021	1141	778	1602	940	950	843	626	805	853	722	698	604	461	640	441	711	555	451	774	854	1345	916	995	1142	1154	1126	1164	661
L1ME2	68	98	98	117	123	48	67	98	78	91	130	119	228	82	140	140	178	166	179	129	109	97	122	161	111	115	79	55	68	110	65	82	64	40	91	52	47	63	33	88	114	120	131	92	120	126	131	153	118
L1ME2z	190	159	173	151	160	102	160	191	87	139	171	241	367	271	230	194	282	232	139	215	191	254	227	324	149	131	102	97	134	113	108	97	74	62	90	76	121	55	66	87	139	252	99	138	180	204	116	202	107
L1ME3	108	168	145	171	107	49	74	115	102	133	196	233	249	156	241	130	231	228	129	163	172	127	116	189	107	200	115	74	81	144	156	160	106	67	163	53	84	82	56	85	105	204	107	98	130	148	121	223	125
L1ME3A	227	262	246	187	158	113	207	172	128	262	247	233	301	129	197	186	200	171	334	176	168	226	254	271	163	152	149	116	173	239	135	135	138	90	239	134	155	100	79	126	130	347	208	157	228	173	157	294	181
L1ME3B	33	16	9	15	13	11	21	20	11	36	38	35	87	17	13	34	45	25	18	73	30	22	55	44	48	57	28	15	40	32	45	22	33	10	31	13	49	38	32	30	35	25	19	47	38	16	51	48	4
L1ME3C	2	4	7	7	6	4	3	3	15	5	15	6	4	0	21	10	12	19	10	9	4	10	9	4	11	16	9	2	7	6	14	12	3	5	4	0	5	2	8	8	6	0	4	3	10	2	8	16	26
L1ME3Cz	97	94	79	138	127	36	84	69	54	92	111	103	114	64	45	68	85	84	40	73	58	67	46	136	101	69	68	82	75	63	107	62	90	26	58	23	51	51	25	30	52	56	46	55	90	44	69	55	58
L1ME3D	158	128	110	75	89	73	107	95	87	159	134	166	211	70	96	77	164	107	115	121	78	81	108	195	94	110	116	59	97	107	124	90	76	39	117	73	73	40	42	42	80	246	111	89	116	74	77	157	204
L1ME3E	21	23	7	19	15	12	6	14	11	9	22	15	18	9	10	7	20	15	15	11	16	17	11	23	21	22	20	19	14	16	6	10	9	14	15	17	11	6	13	10	6	22	17	10	7	19	20	21	6
L1ME3F	70	81	83	99	105	26	87	58	53	97	118	116	89	52	142	72	98	145	77	135	73	87	78	197	73	73	54	53	67	39	47	98	64	33	80	73	38	42	20	43	51	73	107	72	59	62	71	110	30
L1ME3G	29	45	20	18	12	6	5	15	6	22	17	24	21	27	19	23	35	28	12	12	17	18	11	33	15	34	20	12	14	20	12	23	19	4	6	6	21	11	6	18	7	16	11	13	14	12	20	24	19
L1ME4a	453	542	581	391	351	224	303	357	243	393	492	624	764	468	774	609	859	723	609	536	477	500	462	769	267	321	255	189	264	462	357	258	228	196	273	227	284	213	148	225	229	480	341	348	360	543	512	444	220
L1ME4b	367	461	389	386	360	280	370	439	303	403	572	589	850	337	544	439	683	455	597	606	405	403	372	747	358	416	350	242	327	400	314	387	328	213	463	261	262	216	216	355	314	474	401	543	468	575	697	538	164
L1ME4c	106	70	162	69	99	72	63	66	42	92	128	113	177	105	263	204	263	256	340	249	216	222	136	247	60	49	60	54	71	106	79	110	73	43	135	70	109	120	79	117	177	211	205	168	159	115	149	244	55
L1ME5	0	0	0	0	0	0	0	0	0	0	0	0	0	0	0	0	3	3	0	0	0	0	0	0	0	0	1	0	0	4	0	0	1	0	0	0	0	0	0	0	0	1	0	0	0	0	0	6	0
L1MEa	0	0	0	0	0	5	0	0	0	0	0	0	0	0	1	0	4	1	0	0	0	1	0	0	0	0	0	0	0	0	0	0	0	0	0	0	0	0	0	0	0	1	0	0	0	2	0	4	0
L1MEb	2	4	8	10	10	3	1	2	4	5	4	8	0	0	9	0	7	6	12	5	2	1	1	14	2	9	1	14	15	4	4	4	4	2	0	2	5	0	0	3	5	9	3	5	4	3	9	12	4
L1MEc	807	774	572	758	850	544	871	645	500	840	1274	1420	1450	615	927	855	1248	900	1153	1412	1009	846	773	1728	1128	1003	811	1028	1119	1144	1125	902	943	502	866	571	1018	969	429	955	1054	1566	1213	1818	979	1177	1054	1192	410
L1MEd	142	364	434	131	150	147	163	252	175	243	326	297	336	193	448	353	436	356	464	382	368	377	247	540	178	342	230	104	187	214	213	298	181	212	310	238	210	119	133	261	200	508	338	358	365	499	546	476	134
L1MEf	35	101	90	61	59	50	35	111	69	98	137	88	221	89	91	112	158	156	188	131	102	65	62	119	46	117	88	40	61	93	40	76	54	37	101	58	53	19	30	79	99	88	108	100	87	138	118	124	70
L1MEg	256	311	275	215	218	165	202	301	193	326	391	478	461	257	359	315	403	359	381	428	326	308	240	486	239	279	195	203	281	310	239	341	214	216	354	253	251	186	126	294	199	443	386	447	301	436	410	424	186
L1MEg1	0	1	0	0	0	1	0	1	0	1	3	0	2	0	0	5	0	0	0	0	0	0	6	0	2	5	0	0	1	4	0	0	1	0	5	0	0	2	0	0	0	0	0	0	0	0	0	1	0
L1MEg2	4	18	3	6	8	1	0	8	0	8	1	4	8	16	5	6	20	17	13	17	9	17	9	4	17	1	14	4	5	6	1	4	1	0	13	2	7	4	5	11	17	29	22	7	13	1	6	5	107
L1MEh	12	0	1	2	3	6	2	0	0	2	1	3	0	3	5	0	9	7	1	6	0	1	0	2	3	2	6	2	3	2	2	0	0	2	7	2	2	0	3	3	5	16	3	0	0	8	1	2	1
L1MEi	21	1	11	20	2	7	13	9	8	5	14	4	13	12	10	10	14	9	7	6	11	7	2	12	6	5	7	2	8	12	3	8	11	3	5	5	9	5	4	7	10	27	14	7	5	16	8	9	131
L1MEj	17	14	8	4	13	2	7	5	7	13	9	14	19	17	17	9	19	22	11	10	9	4	3	8	6	14	5	2	3	7	3	17	5	5	7	15	6	7	0	10	24	19	17	22	3	7	11	10	13
L1Md_A	38	49	42	49	39	49	42	33	26	39	53	57	66	33	42	31	111	110	45	47	46	43	33	69	44	39	33	49	62	48	62	26	33	23	38	30	34	27	23	67	43	68	53	50	39	69	60	123	75
L1Md_F	24	19	29	21	21	13	24	40	21	28	29	44	17	14	8	20	76	104	32	28	34	15	11	47	30	33	23	22	30	20	35	39	24	22	29	22	39	14	7	27	14	41	30	23	16	29	29	119	84
L1Md_F2	230	263	140	95	61	156	98	158	72	149	184	171	223	75	174	124	774	990	209	200	121	155	141	267	135	126	129	87	138	138	114	204	91	140	160	138	115	97	67	128	168	261	195	281	179	208	303	865	938
L1Md_F3	37	34	27	22	22	34	15	22	14	18	26	42	37	19	34	28	109	127	27	29	23	29	26	34	26	31	22	24	26	33	34	16	26	16	24	24	17	8	15	29	31	53	23	62	28	33	42	135	59
L1Md_Gf	0	2	3	2	0	4	2	9	3	6	4	4	5	3	2	4	11	11	4	4	3	2	2	5	4	1	1	0	2	1	0	2	2	2	2	3	1	2	2	2	2	5	5	1	8	6	11	5	4
L1Md_T	74	77	56	28	29	31	41	61	27	66	60	82	76	61	102	48	152	137	115	109	52	91	81	131	73	60	44	33	58	55	61	81	29	57	66	56	59	34	34	67	89	130	155	137	129	95	148	160	169
L1P5	1	0	0	0	0	0	0	0	0	0	1	0	0	0	0	0	2	2	0	0	1	0	1	0	0	0	0	0	0	0	0	0	0	0	0	0	0	0	0	2	0	0	0	0	0	0	0	0	0
L1PB4	0	4	10	4	2	1	0	5	8	4	3	1	8	3	1	0	6	4	7	2	6	5	3	6	2	8	10	1	2	15	6	5	7	7	2	2	5	1	6	0	5	13	8	13	14	4	4	6	0
L1VL1	8	2	7	14	2	20	5	6	4	9	12	1	14	3	1	13	45	45	9	4	6	7	5	13	11	13	9	3	1	5	15	6	10	11	13	3	4	4	0	5	17	32	14	13	21	9	17	60	24
L1VL2	97	128	114	120	153	134	102	136	69	119	161	176	181	99	203	196	296	368	251	176	155	116	172	240	125	177	124	134	158	140	184	174	171	93	204	112	138	75	69	134	126	215	191	212	136	153	156	348	355
L1VL4	66	79	72	78	68	82	56	71	42	63	75	88	96	73	116	110	201	355	113	117	116	93	74	148	74	83	61	49	60	92	88	77	73	40	59	62	106	46	50	65	72	195	104	97	86	99	109	321	87
L1_Mm	9	12	17	4	9	23	5	9	2	5	11	21	33	9	16	33	56	81	41	26	6	12	8	25	3	7	2	6	4	7	10	14	5	8	9	7	11	9	8	6	18	10	13	9	13	12	14	76	10
L1_Mur1	21	22	27	17	29	25	23	17	11	16	30	27	41	14	34	27	101	158	31	18	27	18	26	48	27	28	20	18	30	16	24	26	17	14	16	19	23	11	15	26	33	78	35	43	42	27	40	205	150
L1_Mur2	964	1029	567	750	842	499	628	727	531	992	1027	1555	922	640	890	842	1085	1089	714	819	572	676	724	1113	748	886	406	627	783	519	686	490	484	293	463	463	604	293	168	528	618	779	522	565	532	641	622	981	855
L1_Mur3	797	840	762	820	838	483	595	583	416	671	869	817	1333	656	1107	941	1443	1498	1089	1059	769	780	676	1528	568	660	588	495	709	758	705	580	556	378	553	352	610	582	284	520	697	894	757	824	684	815	1016	1446	853
L1_Mus1	135	150	154	71	137	136	143	158	109	274	209	293	259	101	417	181	521	676	603	299	438	156	178	329	123	239	192	88	121	114	121	189	106	93	217	166	167	73	110	210	132	400	330	202	171	267	348	833	405
L1_Mus2	395	454	285	258	322	228	254	258	202	316	358	468	363	157	271	232	479	710	271	249	237	287	286	331	374	404	261	234	286	399	309	329	220	217	355	258	202	92	124	303	379	499	189	268	274	369	270	696	849
L1_Mus3	191	215	157	170	216	233	147	202	153	204	239	278	270	119	234	177	691	961	215	260	182	179	171	313	230	247	205	133	191	184	164	224	153	129	190	130	217	112	100	217	209	317	269	223	251	266	320	952	435
L1_Mus4	125	107	88	54	96	89	75	114	53	112	116	126	178	85	112	140	290	395	85	95	108	98	132	148	52	107	81	73	61	100	64	79	44	66	70	39	77	34	31	72	151	119	74	85	100	83	110	337	165
L1_Rod	601	736	627	562	427	250	449	512	404	529	733	774	957	542	751	602	744	722	616	983	695	535	492	968	545	699	584	458	505	578	550	597	450	343	596	477	407	232	222	601	489	817	741	684	662	921	967	779	317
L2	2480	3258	2461	2716	3347	1732	2784	2840	2247	3507	3583	3929	3828	2035	2913	2571	3386	2981	2721	4025	3339	2620	2617	5184	3799	4316	3184	2871	4376	3044	3343	3263	2899	1684	3101	2344	2996	2323	1394	2767	3346	5165	3481	3857	3780	3506	3762	4618	2568
L2a	1758	2418	1697	2027	1861	1250	1518	1683	1304	1853	2512	2765	3166	1567	2297	2184	2858	2634	2307	2419	2053	1885	1595	3236	2014	2627	1820	1691	2018	1915	1840	1868	1648	992	1821	1177	1596	1172	967	1584	1958	3189	2083	2417	2221	2206	2269	2597	1901
L2b	854	992	843	912	789	589	725	765	688	918	892	1191	1365	731	1199	1099	1542	1262	1219	1129	1063	905	842	1617	1008	1152	1035	791	924	804	760	795	746	483	878	625	769	643	422	950	985	1590	998	1004	1001	1163	1195	1288	769
L2c	1070	1284	1107	1027	1141	785	901	1085	878	1176	1279	1675	1565	825	1588	1069	1423	1412	1184	1457	1342	1043	950	1906	1342	1512	1233	977	1305	1143	1044	1162	1159	710	1213	865	1070	713	723	1202	1232	2276	1472	1567	1424	1611	1516	1613	1176
L3	4025	4680	3528	4010	3335	2556	3206	3999	2832	4129	4539	5731	5788	3342	4565	4347	5007	4224	4677	4830	4619	4586	3469	6758	4182	4129	3306	3436	3735	3565	3617	3136	2862	1964	3157	2281	3435	2377	1905	3127	3515	5595	3680	4007	3854	4888	3853	4383	2702
L3b	782	1027	836	909	693	374	440	601	414	659	959	1132	1277	622	891	952	1235	942	1159	1079	574	696	596	990	500	560	417	466	543	783	572	651	567	307	623	394	395	301	272	432	419	707	634	595	521	602	603	612	228
L4_A_Mam	55	70	91	68	115	65	74	90	86	73	140	128	167	59	71	83	149	82	118	131	121	128	106	190	127	152	140	107	82	107	86	76	109	65	124	75	75	56	52	116	163	233	158	138	122	129	117	110	90
L4_B_Mam	1	31	39	24	30	13	15	20	31	17	21	28	27	34	24	25	35	28	16	39	35	15	18	25	14	21	24	10	12	21	16	15	13	8	26	14	19	12	10	16	12	24	35	19	17	16	30	30	73
L4_C_Mam	35	31	29	41	47	38	33	54	51	55	70	85	65	29	38	76	56	52	54	66	61	48	45	92	25	40	27	33	42	55	43	51	47	34	37	42	47	31	23	24	23	59	52	42	39	70	50	75	107
L5	4	6	1	1	3	1	3	2	10	8	6	5	10	8	6	8	11	7	16	3	4	14	9	12	7	2	7	4	10	1	0	5	3	10	8	1	6	2	7	6	9	9	10	7	4	8	10	12	3
LFSINE_Vert	1589	1646	1142	1820	1554	766	1331	1723	1148	1985	2098	2673	2253	1167	1518	1368	1713	1510	1593	2077	1509	1304	1136	2771	1750	2082	1862	1919	1785	1742	1770	1746	1717	951	1577	1351	1636	982	914	1780	1810	2306	1881	2202	1339	1678	1928	1921	673
LSU-rRNA_Hsa	4724	4862	2564	4007	1735	3584	2954	3986	2683	4184	3823	3198	4563	1497	2423	2700	4366	1326	2674	3660	2466	3140	5171	6974	5217	5534	3016	1983	4355	3017	1904	3313	1967	2068	3143	3145	3304	1333	1828	3158	3597	7288	6672	3415	4808	8120	6261	5318	5190
LTR101_Mam	19	34	19	24	15	20	22	34	35	23	17	13	25	13	26	28	30	13	20	20	24	13	3	21	80	81	105	48	56	46	44	38	15	18	30	14	9	19	12	59	55	147	51	56	41	21	59	29	75
LTR102_Mam	0	1	1	1	0	1	0	1	0	3	1	2	0	4	4	2	10	5	4	0	0	1	0	1	1	0	1	0	1	0	0	1	0	2	0	0	2	0	0	1	1	2	1	3	1	3	0	4	18
LTR103_Mam	0	0	0	1	0	2	0	0	0	1	0	0	0	0	0	0	3	1	0	0	0	0	0	0	0	0	0	0	0	1	0	1	0	0	0	0	0	0	0	0	0	0	0	0	0	0	0	1	0
LTR103b_Mam	113	125	31	143	103	46	69	54	24	49	72	123	97	61	108	110	71	111	130	159	123	137	204	287	99	77	37	97	71	68	95	49	49	36	39	31	125	64	81	123	108	187	71	135	124	99	80	117	68
LTR104_Mam	138	199	175	178	115	101	101	100	132	174	214	231	375	166	275	235	199	247	209	269	183	174	114	284	99	188	96	76	74	127	109	125	127	89	153	107	96	90	87	165	151	265	165	134	188	169	184	194	50
LTR105_Mam	0	0	2	1	1	1	3	0	0	1	0	1	1	1	0	0	0	3	0	0	1	4	0	0	0	0	1	0	0	0	0	0	0	1	1	0	0	0	0	4	0	1	1	0	0	1	0	1	5
LTR106_Mam	5	4	3	5	1	0	3	5	3	4	11	8	12	3	1	7	4	9	4	8	2	3	9	4	1	7	1	7	5	1	8	7	3	9	11	1	2	0	3	0	1	9	4	3	6	4	0	4	0
LTR107_Mam	0	0	0	0	0	3	0	0	1	2	0	0	0	0	0	0	2	2	4	0	3	6	0	6	0	1	0	0	0	0	0	0	0	0	0	0	0	0	0	1	0	6	0	6	0	0	0	2	2
LTR108a_Mam	2	0	5	5	2	3	3	5	0	6	5	5	4	2	6	4	14	1	9	15	4	4	5	2	5	9	1	6	3	0	0	4	1	0	8	5	0	2	0	0	0	2	2	0	12	8	1	1	3
LTR108b_Mam	0	3	0	0	3	0	2	0	0	0	0	1	0	1	2	0	0	3	2	1	2	0	0	2	0	2	1	1	0	0	0	2	0	0	0	0	1	1	1	0	0	4	0	1	0	7	0	0	0
LTR108c_Mam	0	0	0	0	0	0	0	0	0	0	0	0	0	0	0	0	2	0	0	0	0	0	0	0	0	0	0	0	0	0	0	0	0	0	0	0	0	0	0	0	0	0	0	0	0	0	0	0	0
LTR108d_Mam	0	0	0	1	1	0	0	1	0	0	0	0	0	0	0	0	2	5	0	2	0	3	0	2	0	0	0	0	1	0	2	0	0	0	0	0	0	0	0	0	1	0	0	0	0	0	0	1	0
LTR108e_Mam	52	129	106	73	49	47	57	89	73	68	73	76	126	60	77	65	61	69	85	108	127	91	56	147	100	121	131	44	57	52	52	63	62	61	88	64	103	46	70	125	57	169	129	121	86	168	142	117	13
LTR109A2	3	0	1	0	0	2	0	0	0	0	0	0	0	0	4	0	5	4	3	1	1	1	2	8	0	0	1	1	2	1	0	2	2	0	0	1	0	1	0	2	1	1	0	1	0	6	0	1	9
LTR10_RN	36	21	25	14	13	21	9	16	26	22	45	12	18	9	35	17	68	62	47	72	30	17	27	80	11	21	14	11	6	8	28	22	7	13	25	16	21	19	8	26	32	50	43	69	29	30	28	36	165
LTR16A	28	42	30	50	56	47	44	60	27	78	50	49	91	42	49	42	75	68	59	65	52	57	24	85	97	85	36	40	40	43	36	46	51	23	52	22	34	24	17	39	42	67	64	51	66	54	57	86	75
LTR16A1	8	13	8	11	13	16	8	13	16	23	23	14	22	9	27	23	33	24	17	41	40	28	13	44	11	8	9	3	4	12	6	7	6	6	10	4	11	9	9	24	19	61	32	27	42	18	27	29	20
LTR16A2	124	241	130	126	134	76	71	164	119	135	148	206	370	139	210	124	166	206	241	228	173	217	189	236	78	178	171	114	151	100	120	147	126	98	173	89	169	72	117	125	183	287	153	188	183	226	261	284	71
LTR16B	0	11	0	0	3	3	3	6	3	5	4	0	5	0	1	1	9	7	5	0	3	2	4	4	1	2	0	7	6	1	0	2	0	8	2	3	0	2	0	5	1	4	3	1	8	0	2	8	1
LTR16B1	1	2	2	1	2	1	5	6	2	2	0	5	0	9	0	0	6	8	0	1	0	0	3	0	1	1	0	1	2	5	2	2	0	0	0	1	0	2	0	3	0	0	0	0	8	2	2	4	2
LTR16B2	8	2	8	9	4	7	7	2	7	3	3	12	8	6	0	1	7	14	12	6	2	0	0	12	8	12	7	5	1	8	0	4	11	7	3	0	4	5	2	0	14	19	12	3	7	13	5	12	26
LTR16C	137	215	161	102	76	53	79	107	100	106	173	92	237	167	175	186	186	193	158	107	113	57	32	123	100	116	107	46	82	136	95	105	76	94	148	69	73	42	56	107	73	220	104	93	139	176	208	190	100
LTR16D	1867	3878	3131	2541	2483	1281	2238	4100	2904	3058	2209	1961	3253	1682	2695	1990	2316	2527	2065	2859	3342	2320	1680	4123	3157	6290	4558	1727	2969	2365	2033	4072	3535	2145	4656	3226	2655	1418	1629	3651	2391	6244	3530	3178	3363	5651	5677	5047	2389
LTR16D1	14	21	33	16	25	26	10	18	19	33	37	58	51	25	47	33	40	34	50	37	25	19	40	29	18	17	11	14	11	11	10	18	11	2	15	8	23	16	9	21	20	36	13	10	19	13	10	36	19
LTR16D2	0	0	0	0	6	0	2	0	0	0	0	1	2	0	0	0	0	1	0	0	0	0	0	0	0	0	0	0	5	0	0	0	0	0	0	0	0	0	0	0	0	0	3	3	0	0	1	1	0
LTR16E1	7	5	3	4	4	3	2	8	2	2	3	1	7	14	6	22	19	26	16	9	3	4	5	9	5	12	1	1	5	7	5	3	0	7	6	3	11	3	10	15	10	13	9	2	14	9	17	16	25
LTR16E2	29	16	8	13	10	8	22	20	8	13	13	21	24	3	1	2	10	13	3	12	17	7	10	34	21	42	23	16	19	19	24	22	15	14	17	11	28	19	3	20	16	57	29	21	25	24	14	34	60
LTR27C	0	0	0	0	0	0	0	0	0	0	0	0	0	0	0	0	0	0	0	0	0	0	0	0	0	0	0	0	0	0	0	0	0	0	0	0	0	0	0	0	0	0	0	0	0	0	0	1	0
LTR28	0	0	0	0	0	1	0	0	0	0	0	0	0	0	0	0	1	1	0	0	0	0	0	0	0	0	0	0	0	0	0	0	0	0	0	0	0	0	0	0	1	0	0	0	0	0	0	2	0
LTR28B	1	3	0	3	4	3	4	1	2	3	9	1	4	0	0	3	2	6	0	2	4	5	1	3	7	1	3	0	0	4	0	3	0	1	7	3	5	0	0	2	8	11	1	1	9	6	13	5	34
LTR29	0	0	0	0	0	0	0	0	0	0	0	0	0	0	0	0	0	3	0	0	0	0	0	0	0	0	0	0	0	0	0	0	0	0	0	0	0	0	0	0	0	0	0	0	0	0	0	0	0
LTR31	10	7	12	10	6	13	9	3	12	6	8	9	7	5	9	5	12	14	16	18	18	6	7	12	6	12	24	6	5	12	10	5	9	9	9	16	3	8	3	15	10	18	13	9	16	19	18	13	13
LTR33	12	29	20	26	26	33	9	38	31	29	36	42	58	17	32	28	66	69	23	17	30	27	15	33	24	35	20	25	27	15	40	28	29	23	37	22	13	12	11	14	22	30	28	36	15	37	51	46	49
LTR33A	46	12	13	8	20	7	12	27	8	12	30	46	19	24	15	30	22	39	27	37	24	17	17	29	27	25	17	16	45	21	15	16	20	14	21	14	9	9	5	36	4	30	21	30	35	14	11	22	27
LTR33A_	10	17	14	20	12	10	22	21	17	18	32	22	10	7	23	8	39	23	10	28	29	15	14	21	43	26	27	16	25	18	11	9	10	17	17	24	14	11	9	19	16	57	13	21	44	26	22	28	33
LTR33B	19	7	6	10	11	11	20	25	13	4	24	39	12	5	23	5	8	9	13	19	17	14	13	28	27	48	40	27	36	12	12	35	13	6	23	19	16	13	11	40	26	66	41	32	22	32	33	38	31
LTR33C	35	21	20	25	41	19	29	46	19	49	53	65	37	27	21	41	21	22	25	33	36	29	20	44	13	33	17	17	19	19	23	32	29	12	22	22	25	7	11	19	18	48	39	22	39	46	31	46	53
LTR34	0	0	0	0	0	0	0	0	0	0	0	0	5	0	0	0	0	0	0	0	0	0	0	0	0	0	0	0	0	0	0	0	0	0	1	0	0	0	1	0	0	0	0	1	2	0	0	2	0
LTR37-int	65	79	69	87	84	21	68	58	41	53	100	57	48	72	148	52	166	75	68	77	35	39	51	68	28	51	30	13	35	58	50	40	37	16	19	17	27	21	6	2	27	57	18	27	33	46	33	37	141
LTR37A	1	18	29	15	12	11	6	22	23	42	9	19	35	31	23	54	47	32	68	25	26	45	23	25	13	11	6	2	13	8	6	6	8	3	11	7	10	1	7	17	6	13	2	15	8	18	8	31	36
LTR37B	8	14	10	14	10	6	12	8	6	15	9	16	21	22	13	39	47	56	58	25	59	32	22	20	6	16	6	7	10	8	3	7	6	9	12	3	14	10	7	34	34	22	33	17	23	53	25	29	29
LTR39	0	0	0	0	0	0	0	0	0	0	0	0	0	0	0	0	1	0	0	0	0	0	0	0	0	0	0	0	0	0	0	0	0	0	0	0	0	0	0	0	0	0	0	0	0	0	0	0	0
LTR40A1	0	3	0	0	2	1	2	7	8	2	0	4	0	4	1	0	3	0	0	0	6	0	2	3	0	0	0	0	4	0	2	2	0	1	0	0	0	0	0	0	2	0	0	1	0	0	0	1	0
LTR40a	31	30	10	20	31	17	21	16	11	15	34	32	24	21	26	25	41	24	16	34	30	34	10	37	16	33	34	22	27	26	22	15	28	12	18	22	18	19	20	14	61	99	47	34	40	32	41	26	94
LTR40b	3	16	22	3	17	10	15	14	5	15	6	12	13	12	4	23	20	24	5	11	8	23	2	18	3	11	6	8	7	13	8	5	11	7	8	0	5	5	0	5	9	32	8	2	14	4	13	25	42
LTR40c	23	17	12	16	17	9	17	8	11	14	30	15	33	20	30	22	35	40	46	60	43	25	19	33	22	15	25	13	15	16	17	17	12	11	14	15	12	10	11	28	14	26	25	26	17	41	17	25	4
LTR41	16	16	11	4	7	9	10	12	8	3	6	28	13	3	8	18	32	27	22	18	22	19	9	16	33	18	18	11	14	5	16	10	7	11	9	12	14	14	11	11	19	34	36	12	15	8	28	13	13
LTR41B	62	74	47	47	54	21	34	36	28	58	47	70	89	59	64	60	86	66	48	47	43	32	30	73	45	45	47	29	38	52	29	43	54	32	48	34	39	44	32	32	59	73	30	56	51	46	53	52	61
LTR44	0	0	0	0	0	0	0	0	0	0	0	0	0	0	0	0	0	0	0	0	0	0	0	0	0	0	0	0	0	0	0	0	0	0	0	0	0	0	0	0	0	0	0	0	0	0	0	1	0
LTR45	0	0	0	0	0	0	0	0	1	0	0	0	1	1	1	2	2	5	4	9	1	5	1	5	3	2	1	3	0	4	0	0	2	0	3	0	4	2	0	1	1	4	0	3	4	2	3	1	4
LTR45C	0	0	0	0	1	0	0	0	0	0	1	2	0	1	0	2	1	1	0	0	0	0	0	0	0	0	0	0	0	0	1	0	0	0	0	0	0	0	1	0	0	8	0	0	2	0	0	0	2
LTR48	42	55	135	32	91	85	31	45	62	134	147	202	197	58	257	169	213	187	257	233	256	118	65	179	23	16	11	18	17	41	62	70	60	37	40	47	67	58	28	44	60	66	46	45	36	45	92	206	67
LTR48B	5	13	6	7	11	8	9	7	7	9	16	13	11	8	1	13	18	21	16	18	14	6	3	14	4	12	3	0	5	10	7	4	14	0	4	12	12	23	2	26	7	13	11	10	6	5	11	58	11
LTR50	4	16	31	12	11	16	12	37	10	18	6	13	28	14	36	25	35	36	18	13	44	14	12	26	25	32	17	9	29	3	19	35	19	13	19	13	51	17	15	28	29	30	23	34	37	50	32	27	37
LTR52	18	23	27	14	40	16	15	17	13	23	55	67	52	27	65	14	49	42	53	36	16	39	43	35	17	19	22	27	10	19	16	28	15	16	13	17	20	16	8	19	18	21	13	25	21	10	36	22	8
LTR52-int	5	10	8	0	11	8	7	6	9	0	6	44	17	3	23	5	23	9	7	9	3	5	13	5	15	5	6	5	6	0	0	0	0	4	0	4	8	8	15	3	3	2	13	3	15	6	11	4	15
LTR53	7	0	1	1	2	1	1	5	3	2	3	4	10	3	5	8	8	10	17	1	4	5	1	11	2	9	2	1	1	3	4	6	0	3	0	0	4	3	1	1	4	14	1	0	1	11	1	11	8
LTR53B	0	0	0	0	0	2	0	1	0	0	1	0	0	0	1	0	4	7	0	0	0	0	0	0	0	0	0	0	1	0	1	0	0	0	0	0	0	0	0	0	0	0	0	0	0	0	0	1	0
LTR55	3	9	2	8	13	3	6	3	0	3	6	14	4	3	3	5	5	7	3	2	5	3	2	2	4	6	9	0	1	0	8	2	3	0	7	0	5	3	0	1	4	4	4	1	4	7	5	15	8
LTR58	0	0	2	0	0	0	0	0	0	0	0	0	0	0	0	0	0	0	0	0	0	0	0	0	0	0	0	0	0	0	0	0	0	0	0	0	0	0	0	0	0	0	0	0	0	0	0	0	0
LTR64	0	0	0	0	0	0	0	0	0	0	0	0	0	0	0	0	1	0	0	0	0	0	0	0	0	0	0	0	0	0	0	0	0	0	0	0	0	0	0	0	0	0	0	0	0	0	0	0	0
LTR65	18	12	23	14	2	10	17	17	4	15	19	14	31	19	17	19	25	31	5	19	12	4	4	9	18	16	14	21	15	29	4	6	8	8	19	15	12	15	8	12	19	17	13	18	8	11	6	19	13
LTR67B	17	19	22	5	34	21	18	33	17	19	46	43	32	10	81	75	69	60	60	37	40	19	76	71	68	49	19	41	34	25	17	37	23	29	17	18	25	22	18	11	46	99	41	79	56	44	33	47	50
LTR68	0	0	0	1	1	2	0	0	0	1	5	1	0	0	0	0	0	4	0	0	0	0	3	1	1	0	1	0	0	0	0	0	0	0	3	0	0	0	0	0	2	0	3	0	0	2	0	3	0
LTR69	0	0	0	0	0	0	0	0	0	0	0	0	0	0	0	0	0	3	0	0	0	0	0	0	0	0	0	0	0	0	0	0	0	0	0	0	0	0	0	0	0	0	0	0	0	0	0	0	0
LTR72_RN	35	33	32	23	25	22	18	19	22	32	39	48	52	37	31	49	28	68	99	63	44	54	30	59	16	8	18	32	18	26	26	39	28	13	26	9	25	12	9	53	26	83	97	49	67	31	70	32	79
LTR73	3	3	1	0	0	4	3	2	2	7	1	0	5	0	1	4	7	10	3	1	1	2	0	2	4	1	2	1	1	2	8	1	1	0	3	5	0	1	0	1	5	0	2	7	0	0	10	6	0
LTR75	0	2	4	0	2	6	0	1	0	5	0	4	0	0	6	1	1	4	4	0	0	9	1	2	1	0	0	1	1	0	0	0	0	0	0	0	0	0	1	0	0	0	2	1	1	2	5	3	0
LTR75B	0	1	0	0	0	0	1	0	0	2	0	0	0	0	0	1	0	2	0	0	0	0	1	2	3	0	1	2	0	0	0	0	0	0	0	0	0	0	0	0	0	6	0	0	0	0	2	0	0
LTR77	0	0	0	0	0	0	0	0	0	0	0	0	0	0	0	0	0	0	0	0	0	0	0	0	0	0	0	0	0	0	0	0	0	0	0	0	0	0	0	0	0	0	0	0	0	0	0	0	0
LTR78	43	57	20	45	93	49	76	49	73	72	66	94	65	30	77	45	75	51	78	128	83	94	137	172	96	122	115	83	113	49	50	45	79	30	52	38	144	72	43	71	89	177	123	193	78	167	108	109	59
LTR78B	212	385	322	209	187	194	247	288	202	278	196	341	345	240	486	350	299	386	264	326	476	344	323	598	233	360	269	162	233	142	195	213	173	220	206	211	296	174	211	291	245	549	454	297	341	580	383	457	93
LTR79	38	33	31	31	20	15	16	28	16	20	7	26	29	34	30	36	25	44	34	21	41	37	27	52	11	25	16	18	20	17	12	6	15	12	26	22	20	13	6	20	8	34	21	23	22	35	27	34	17
LTR80A	0	0	0	1	4	3	0	0	1	6	0	3	4	2	0	0	0	2	0	1	0	0	0	1	2	3	1	1	1	5	2	0	0	0	0	1	0	0	1	0	1	1	0	0	0	0	7	0	0
LTR80B	1	0	0	0	0	1	0	0	0	1	0	0	0	0	1	0	2	0	0	0	0	1	0	0	0	0	0	0	0	0	0	0	0	0	0	1	0	0	0	0	0	0	0	0	0	0	0	0	0
LTR81	2	0	2	0	0	0	0	0	0	0	0	0	14	0	0	0	2	2	1	0	0	0	0	2	0	0	0	0	0	0	0	0	0	0	1	0	0	0	0	0	0	2	0	0	0	0	1	2	0
LTR81A	2	1	1	7	8	3	2	7	6	3	7	7	3	0	0	1	4	6	2	1	2	2	4	10	6	5	10	1	3	8	2	3	2	0	2	0	0	2	2	3	1	2	1	4	1	4	11	7	4
LTR81B	0	0	1	0	0	1	0	1	0	1	1	0	3	0	0	1	6	4	0	0	4	0	2	1	1	2	3	1	0	0	0	0	2	3	0	1	0	0	0	0	0	0	1	0	0	3	2	2	3
LTR81C	7	6	3	2	2	4	5	1	4	7	8	10	11	3	3	3	1	6	3	6	10	4	9	11	9	12	4	3	7	8	6	3	2	3	4	8	10	6	4	7	3	3	10	5	11	9	2	9	32
LTR82A	541	559	362	347	382	213	303	352	243	375	520	658	783	314	444	484	406	367	369	402	405	341	294	631	300	359	242	221	278	363	348	219	241	199	325	207	260	203	140	207	298	406	227	269	360	481	356	303	284
LTR82B	4	1	0	1	0	3	1	7	1	0	1	5	1	0	2	6	2	6	2	4	0	11	3	1	1	1	0	0	0	1	0	4	0	0	0	0	0	0	0	1	1	0	4	1	0	2	2	3	1
LTR83	0	0	6	0	0	0	1	3	5	1	5	0	0	0	4	0	1	4	1	4	0	0	3	5	0	0	0	7	0	0	1	3	9	7	0	0	0	4	1	13	2	13	1	1	1	0	0	4	26
LTR84a	0	0	0	0	0	1	0	0	0	0	0	0	0	0	0	0	3	4	0	0	0	0	0	0	0	0	1	0	0	0	0	0	0	0	0	0	0	0	0	0	0	1	0	1	2	0	0	1	12
LTR84b	0	2	0	2	5	3	0	2	1	3	6	0	1	3	1	0	5	9	3	5	1	0	5	3	2	2	1	0	2	2	3	0	4	0	3	1	0	3	1	3	1	0	6	1	3	2	8	5	3
LTR85a	14	18	3	5	8	3	2	4	8	6	6	13	9	6	4	0	10	6	5	9	5	7	1	16	18	28	11	9	13	4	4	4	8	4	7	6	13	5	2	3	17	16	12	14	15	11	11	10	27
LTR85b	0	0	0	0	0	0	1	0	0	2	1	0	0	1	0	0	0	2	2	0	0	0	0	0	0	1	4	0	3	0	7	1	0	3	0	1	2	1	0	0	0	0	2	2	1	1	6	1	12
LTR85c	0	11	0	5	4	0	0	1	0	2	4	3	0	6	4	2	7	8	1	3	0	2	0	6	0	11	2	0	4	0	0	5	0	4	3	10	4	2	2	3	2	1	5	7	11	8	2	9	3
LTR86A1	0	1	1	2	0	1	0	0	0	2	0	4	0	1	3	2	6	6	0	1	3	0	0	1	1	0	0	0	0	0	0	0	0	0	3	1	2	1	0	2	2	0	0	0	0	1	0	3	5
LTR86A2	0	2	0	1	0	3	1	0	0	0	0	0	0	0	0	0	2	0	0	0	0	0	0	1	0	0	0	0	0	0	0	0	0	0	0	0	0	2	0	0	0	0	0	0	0	0	0	1	0
LTR86B1	8	14	19	13	7	11	7	9	8	11	8	9	15	21	20	22	27	31	15	11	29	35	15	21	5	11	6	5	2	4	5	4	4	1	5	8	6	2	6	6	8	31	16	9	12	24	11	9	13
LTR86B2	0	0	0	0	0	0	0	0	0	0	0	0	0	0	0	0	0	2	0	0	0	0	0	0	0	0	0	0	0	0	0	0	0	0	0	0	0	0	0	0	0	0	0	0	0	0	0	0	0
LTR86C	0	0	1	0	0	1	0	0	0	0	1	0	0	0	0	0	0	3	5	0	1	6	0	3	0	2	1	1	0	0	0	1	0	0	0	0	0	0	0	0	2	0	0	0	0	0	0	1	0
LTR87	39	53	45	71	38	13	23	36	20	22	41	86	102	47	81	60	80	82	98	44	24	27	30	58	22	34	24	11	23	44	22	12	15	8	14	15	26	24	7	13	22	19	27	23	22	28	27	43	7
LTR88a	5	5	9	7	4	4	4	5	3	7	6	11	9	5	7	6	2	8	11	10	2	5	9	9	1	10	2	4	13	11	8	6	3	1	7	7	12	1	1	7	9	4	6	3	9	4	5	5	7
LTR88b	1	9	4	0	2	2	3	2	2	7	3	6	0	1	1	4	0	3	11	3	5	4	2	14	2	8	7	1	1	1	0	6	1	7	5	1	2	4	1	5	5	1	7	3	1	5	9	10	0
LTR88c	2	10	17	4	1	5	0	4	4	10	1	0	6	3	12	1	5	2	14	14	4	4	2	11	6	18	9	1	1	6	7	7	4	5	13	3	0	6	2	13	0	10	4	1	4	11	5	17	2
LTR89	11	0	4	4	5	8	1	3	3	5	5	6	5	7	1	1	1	5	13	2	4	9	2	6	10	12	9	6	3	2	0	8	13	3	4	7	2	0	5	2	2	3	10	5	2	4	21	5	6
LTR9	0	0	0	0	0	0	0	0	0	0	0	0	0	0	0	0	0	0	0	0	0	0	0	0	0	0	0	0	0	0	0	0	0	0	0	0	0	0	0	0	0	0	0	0	0	0	0	0	0
LTR90A	0	2	0	0	0	0	0	0	0	0	0	0	0	0	0	0	1	5	0	0	0	0	0	0	0	0	0	0	0	0	0	0	0	0	0	0	0	0	0	0	0	1	0	0	0	0	0	1	0
LTR90B	0	0	0	0	0	0	0	1	0	0	0	2	0	2	0	0	0	2	0	0	0	0	2	0	0	1	0	0	0	0	1	1	0	1	0	0	0	0	0	0	0	0	1	0	0	0	0	2	0
LTR91	0	1	0	3	0	0	0	0	0	0	0	3	5	1	7	1	1	4	7	1	0	1	1	4	0	0	0	0	0	0	0	3	0	0	0	0	1	0	1	0	0	0	0	0	0	0	2	3	2
LTRIS2	373	480	411	469	361	289	280	335	340	406	563	594	726	462	560	576	612	578	861	498	543	477	429	738	310	375	341	368	317	441	365	412	339	180	397	280	347	240	236	405	325	578	350	369	355	446	579	730	663
LTRIS3	1	0	4	3	3	4	0	6	1	6	0	4	11	2	3	6	5	8	7	3	6	8	6	1	6	0	5	0	1	4	7	2	4	2	4	0	5	1	2	0	7	1	4	13	3	2	3	24	10
LTRIS4	1	0	0	0	2	0	0	1	0	0	3	1	0	0	0	2	0	0	1	0	1	2	0	0	0	1	0	2	0	1	0	0	0	3	1	0	2	0	0	0	1	0	3	0	0	1	1	0	3
LTRIS4A	23	43	26	38	62	33	25	40	31	39	62	57	22	17	39	62	48	49	43	63	49	45	37	85	34	57	51	48	69	48	45	40	49	23	59	14	38	38	13	45	60	55	32	72	48	39	28	59	90
LTRIS4B	0	0	0	0	0	0	0	0	0	1	0	0	0	0	0	0	1	1	0	0	0	0	0	0	0	2	0	0	0	0	0	1	0	0	1	0	0	0	0	0	0	0	0	0	0	0	0	0	0
LTRIS5	1	2	1	0	0	1	6	1	1	0	0	0	15	0	0	0	1	7	2	10	6	6	2	6	2	4	1	1	3	3	2	1	0	3	5	3	1	1	5	3	3	8	3	3	3	9	6	4	8
LTRIS6	3	7	3	3	4	4	2	4	3	6	3	6	0	1	3	2	7	6	2	6	3	3	4	6	5	4	5	1	13	8	5	5	7	3	8	5	3	4	3	9	6	10	2	9	10	4	10	4	9
LTRIS_Mm	0	0	0	0	0	1	0	1	0	0	0	0	0	0	0	0	7	3	1	0	0	5	1	0	0	1	0	0	1	1	1	0	1	0	0	0	0	0	0	0	0	0	0	0	1	0	2	4	10
LTRIS_Mus	11	21	11	13	41	11	16	31	16	22	32	38	22	11	11	16	31	34	24	44	29	47	35	73	15	26	23	14	23	18	18	18	15	15	13	16	20	12	12	31	31	37	42	35	27	34	38	39	158
Looper	13	10	8	15	13	5	9	8	3	8	13	17	21	1	9	15	13	17	12	10	8	15	5	7	20	13	7	6	1	12	2	12	3	0	6	5	12	7	3	12	21	18	6	10	4	16	12	13	1
Lx	140	187	184	168	158	208	157	171	146	268	215	272	198	125	221	258	511	645	204	291	220	235	194	288	214	347	186	112	180	191	223	195	167	127	219	187	164	114	102	181	211	479	279	232	247	304	335	626	612
Lx10	281	252	307	267	231	128	167	242	193	291	231	304	532	316	592	318	452	529	454	305	282	346	228	466	194	225	164	120	166	168	155	177	120	113	165	154	197	134	93	229	163	321	269	271	268	275	306	449	202
Lx2	269	231	155	289	171	184	126	140	149	277	297	257	223	137	247	203	437	562	320	223	203	251	190	328	179	241	185	155	215	291	181	200	121	130	263	193	138	105	69	205	238	412	265	258	223	286	316	496	423
Lx2A	24	6	17	22	5	9	7	22	7	23	10	18	31	8	33	23	51	35	15	19	28	17	46	47	16	26	6	17	16	24	11	10	6	5	9	16	28	16	9	17	7	34	15	22	21	41	27	25	37
Lx2A1	16	47	34	35	39	23	21	22	21	30	15	50	16	63	28	39	72	73	34	59	52	24	36	76	16	34	48	21	41	22	32	24	36	21	34	25	64	51	14	42	35	84	47	87	34	39	78	67	64
Lx2B	44	109	73	85	67	81	58	87	68	127	86	78	130	58	108	77	211	200	85	92	102	87	99	135	101	107	92	36	116	62	102	88	81	74	76	90	108	41	73	86	82	177	89	108	107	135	167	274	102
Lx2B2	362	634	461	340	343	350	341	431	451	443	457	673	693	254	601	527	762	674	597	560	494	495	476	691	387	561	404	281	388	332	294	381	335	222	321	401	419	239	202	415	362	645	500	491	482	433	687	686	619
Lx3A	438	498	300	463	410	309	363	513	380	579	650	848	623	357	515	405	616	479	387	682	569	585	551	784	547	704	583	483	504	449	438	417	416	370	475	382	585	340	330	591	495	847	715	769	712	782	896	708	456
Lx3B	107	330	195	138	167	94	157	234	162	201	199	263	188	151	158	175	252	291	212	259	226	231	150	411	188	386	269	121	158	150	168	251	190	164	215	172	197	126	115	277	148	478	356	273	231	401	456	400	750
Lx3C	433	453	621	335	488	388	413	572	391	550	521	941	643	452	811	621	827	941	933	706	804	734	526	849	340	487	390	238	423	345	341	374	334	238	519	316	534	237	284	483	394	653	533	416	505	597	816	852	699
Lx3_Mus	5381	7052	5103	4873	4153	1894	3398	3656	2550	4958	6370	6817	8466	3560	7206	4472	6651	4747	4175	5881	3203	3976	3741	7113	5017	5735	4056	3930	6871	4321	5344	4319	4569	2873	4169	3889	3416	3090	1644	2925	3070	5149	4686	5448	4267	4653	4950	6396	1330
Lx4A	937	1270	1036	1119	1154	819	1201	948	844	1295	1445	1593	1476	538	1220	1030	1526	1153	1071	1062	1114	958	787	1773	1267	1365	932	717	831	927	1008	1048	951	604	891	615	792	639	430	725	1023	1553	1102	1206	1042	962	1065	1403	953
Lx4B	171	182	191	197	199	86	129	119	128	177	197	236	384	211	301	235	368	348	210	238	186	138	122	322	127	154	106	87	146	166	115	105	138	115	149	87	166	106	71	140	138	271	219	194	196	191	243	302	280
Lx5	241	271	197	175	305	232	234	231	233	341	332	310	510	250	447	415	650	776	386	370	360	369	402	503	338	379	277	200	272	272	191	259	206	169	273	214	296	198	143	288	250	501	410	359	295	426	423	745	788
Lx5b	291	330	267	262	221	175	211	359	275	243	325	376	503	410	440	385	601	637	582	364	393	428	307	547	315	449	365	237	271	235	193	257	159	163	251	196	339	181	205	255	353	624	327	320	409	517	484	572	1415
Lx5c	243	380	299	269	277	220	255	347	266	346	308	371	486	256	440	363	562	616	390	443	411	295	381	540	328	534	393	177	294	267	273	263	254	188	443	205	339	174	166	374	359	529	504	356	349	528	755	812	428
Lx6	420	632	565	390	439	374	372	604	482	543	441	1008	559	285	553	417	810	918	603	670	642	673	399	1068	379	520	389	245	401	353	303	363	317	247	383	392	437	210	242	452	344	728	513	477	528	684	899	970	857
Lx7	879	1097	882	1032	1192	685	810	1023	812	1100	1367	1680	1434	767	1380	1171	1894	1736	1642	1379	1496	1222	1243	2135	1307	1428	1128	935	1146	1101	1036	1081	956	639	1061	866	1140	931	591	851	1192	1583	1422	1524	1063	1474	2001	2732	1826
Lx8	5816	6079	5543	5568	5251	3268	4315	5280	3651	5795	6694	8449	9115	4594	6714	6524	7897	7613	6155	7623	5749	6220	5115	8903	4964	5182	4242	4390	5661	4523	5201	4265	3751	2734	4920	3254	4094	3363	2389	4171	4733	7217	4782	5527	5638	5880	5943	7098	3361
Lx8b	610	728	776	756	655	433	487	580	489	636	790	1054	1115	609	987	730	1327	1247	1112	907	747	789	625	1120	654	771	596	471	580	679	632	646	500	351	678	428	606	463	305	617	614	946	707	685	748	707	956	1195	763
Lx9	2009	2256	2063	1995	1410	1003	1294	1582	1149	1737	1905	2524	3964	2020	2695	2439	3409	2965	3289	2427	1916	2121	1450	3051	1281	1632	1208	877	1162	1489	1060	1249	1023	715	1184	869	1121	728	614	1215	1279	1944	1854	1489	1662	2087	2339	2635	1637
MADE2	0	0	0	1	1	2	0	3	2	0	0	2	1	1	2	0	2	4	1	0	4	0	1	2	2	5	0	1	0	1	0	0	0	0	0	0	2	1	1	2	2	1	0	2	1	0	0	4	1
MARNA	417	617	414	577	249	141	403	373	273	367	556	556	848	354	353	299	491	326	431	364	267	308	201	485	307	464	280	244	333	446	274	327	204	157	249	219	185	114	124	166	228	395	247	214	392	380	328	332	413
MER101B	3	1	3	2	0	0	1	0	0	1	2	3	0	2	0	1	1	2	2	1	0	4	1	4	0	0	1	0	0	0	0	0	1	0	0	0	0	2	0	2	2	0	1	4	0	0	3	1	0
MER102a	399	503	355	446	389	177	309	327	271	470	520	584	613	283	391	387	387	366	371	557	355	329	304	632	442	464	395	368	497	373	347	373	384	203	454	277	368	231	200	289	348	481	385	466	272	419	450	449	165
MER102b	19	11	12	6	23	17	14	13	13	23	17	21	69	12	28	30	20	24	23	11	9	18	12	14	23	14	20	13	7	6	15	16	3	8	13	7	10	19	7	8	4	20	15	16	12	2	15	33	84
MER102c	0	1	1	1	4	2	1	2	0	0	4	1	0	3	4	1	6	9	12	10	0	0	0	1	2	0	3	0	3	0	0	1	3	0	0	0	2	1	0	0	0	3	2	4	1	1	1	9	0
MER103C	173	303	219	213	173	75	163	221	159	231	238	292	231	133	80	136	215	198	116	172	124	96	110	229	137	145	159	93	130	170	204	180	129	112	172	116	122	52	74	157	95	114	86	90	143	180	147	130	95
MER104	0	10	6	6	7	7	1	3	6	9	10	5	21	9	10	13	9	8	26	7	10	7	3	12	4	15	2	3	4	7	1	6	5	9	4	1	5	10	5	14	6	6	11	6	10	5	2	11	2
MER105	4	6	1	0	0	1	1	0	0	0	0	0	0	4	0	0	4	2	1	0	0	0	2	0	2	1	3	2	2	0	0	4	1	0	0	0	0	0	0	0	2	2	3	1	1	0	1	2	0
MER106A	6	4	9	3	4	4	3	12	5	9	6	8	15	2	12	5	18	16	8	11	7	5	5	8	11	5	1	3	2	2	9	6	5	1	7	4	1	3	2	8	1	14	12	3	2	5	9	14	15
MER106B	2	7	4	2	7	0	2	2	5	7	9	10	5	2	2	0	9	4	11	11	1	2	4	6	4	4	2	1	9	0	0	2	0	0	2	3	5	1	4	0	1	4	6	2	4	4	4	10	2
MER110	3	0	0	1	0	1	1	0	1	2	5	1	3	3	4	1	1	4	4	1	0	1	1	2	1	0	0	1	0	0	3	1	1	0	0	0	1	1	4	1	0	1	0	0	0	0	0	3	0
MER110-int	0	0	0	0	0	0	0	0	0	0	0	0	0	0	0	0	0	0	0	0	0	0	0	0	0	0	0	0	0	0	0	0	0	0	0	0	0	0	0	0	0	0	0	0	0	0	0	0	0
MER110A	1	0	0	2	3	3	0	0	0	0	0	0	0	0	5	0	4	8	3	2	1	1	1	2	2	0	2	0	3	6	0	3	0	0	3	2	3	0	0	0	2	0	0	0	4	3	0	6	0
MER112	8	3	3	2	3	6	7	6	4	10	12	9	24	11	20	8	19	19	44	23	7	7	8	12	1	8	13	1	4	9	5	8	8	1	19	1	5	6	4	9	19	39	9	7	25	11	8	12	22
MER113	28	60	32	30	23	22	29	39	28	18	19	39	54	26	54	19	46	44	28	33	31	30	18	37	50	54	81	17	50	43	47	43	25	37	26	19	9	15	15	45	35	71	52	32	42	41	54	58	73
MER113A	11	0	4	3	3	2	1	2	1	1	1	4	9	8	5	2	11	3	2	3	5	2	2	7	1	0	1	0	0	1	2	2	1	1	2	1	1	0	0	2	1	1	1	2	6	2	9	1	0
MER113B	0	0	0	2	0	1	1	3	0	0	0	2	0	0	0	0	2	0	0	2	0	0	1	0	0	0	0	1	0	0	0	1	0	0	0	0	0	0	0	0	0	0	0	0	0	0	0	0	0
MER115	0	4	0	0	0	2	0	2	0	3	3	0	0	4	0	3	7	10	2	1	2	0	2	0	3	7	1	2	0	0	0	0	2	2	1	0	2	3	0	2	0	2	6	3	1	0	3	10	18
MER117	42	41	13	37	31	11	17	26	20	26	30	47	33	55	55	39	56	54	50	82	59	87	60	63	15	34	26	25	38	33	22	30	20	27	19	13	47	37	21	38	40	79	48	49	45	63	29	58	63
MER119	420	353	206	381	426	152	376	399	279	475	439	746	817	419	426	265	509	319	350	459	326	502	373	762	327	384	234	320	365	348	231	271	222	162	337	209	431	260	213	239	354	412	313	428	510	408	420	421	10
MER121	12	25	2	5	21	3	6	14	17	16	13	7	26	7	30	14	31	28	18	23	14	6	12	23	24	25	14	13	17	12	5	28	12	14	35	23	8	8	13	24	3	27	8	21	7	25	36	41	18
MER123	0	0	0	0	1	2	0	0	0	4	3	1	0	1	0	0	1	0	0	0	0	0	1	2	1	1	0	1	0	1	0	0	0	1	1	1	1	0	0	0	1	0	1	0	1	0	0	0	0
MER124	11	14	10	7	9	5	6	10	19	10	8	12	33	12	16	23	8	9	10	23	11	16	23	6	13	11	7	11	8	23	9	10	4	1	16	0	13	5	10	5	12	23	15	21	9	10	27	35	11
MER125	0	0	0	0	0	1	0	0	0	0	0	0	2	0	0	0	0	6	0	0	0	4	0	0	0	2	0	0	0	3	0	0	0	0	0	0	5	0	0	0	0	0	0	0	3	0	0	4	6
MER126	24	28	14	20	27	9	14	20	21	12	19	44	48	15	22	18	18	9	10	15	12	11	13	34	17	12	8	19	9	16	15	17	18	9	12	6	5	6	2	4	7	10	21	22	10	12	14	9	0
MER127	13	7	3	1	3	6	1	3	2	1	1	3	5	0	5	0	2	6	1	1	0	3	5	2	1	4	4	4	3	1	2	8	1	0	0	0	5	2	1	2	1	5	1	2	0	1	2	3	0
MER129	0	0	0	0	0	1	0	0	0	0	1	1	0	0	0	1	1	0	0	4	1	0	4	0	0	0	0	0	0	0	0	0	1	0	0	0	0	0	0	0	1	0	0	0	0	4	2	1	0
MER130	7	1	5	2	1	2	0	3	2	7	2	2	11	6	9	13	9	7	11	1	4	4	2	5	1	1	0	0	0	0	3	3	2	0	0	2	3	4	0	3	4	0	2	2	1	0	2	3	11
MER131	23	34	10	19	22	7	16	25	20	17	18	20	21	28	28	18	18	24	34	22	8	16	11	23	28	36	29	11	21	12	10	9	12	12	14	11	10	4	7	15	12	17	21	9	17	21	16	12	45
MER133A	0	2	0	0	0	0	0	0	0	0	0	0	0	0	0	0	0	1	0	0	0	0	0	1	0	0	0	0	1	0	0	0	0	0	0	0	0	0	0	0	0	2	0	2	0	0	0	0	0
MER134	0	2	0	1	1	0	0	0	0	0	3	0	1	0	0	0	2	0	0	0	0	0	0	1	0	1	0	0	1	0	0	0	0	0	0	0	0	0	0	0	0	0	0	2	0	0	0	0	0
MER135	166	154	173	174	95	65	88	81	54	122	179	185	256	212	212	196	269	176	220	217	151	164	153	223	78	62	96	57	53	145	77	84	66	52	80	62	120	74	54	96	74	115	60	70	82	141	173	211	68
MER136	5	6	14	9	14	10	2	21	19	31	22	24	22	20	5	15	23	26	20	24	24	18	14	51	13	21	12	11	15	12	11	19	25	7	28	12	7	7	7	7	10	28	14	7	9	2	19	30	34
MER2	649	862	770	727	596	400	587	706	516	707	885	906	1398	733	855	784	1023	1029	893	926	660	676	496	1196	638	664	550	511	612	567	514	540	460	320	531	397	465	401	311	606	576	927	683	731	646	747	743	805	516
MER20	711	1117	801	988	789	357	781	751	688	903	925	1132	1395	697	820	726	1118	893	881	979	770	839	715	1426	1016	1185	1034	819	1061	806	789	790	596	339	779	534	815	515	356	707	737	1290	821	851	892	1201	1066	1072	684
MER20B	38	41	44	38	32	21	34	38	26	38	53	39	97	40	75	68	55	73	65	67	27	25	11	48	40	21	27	17	21	35	30	26	21	14	25	18	20	21	14	31	24	49	33	47	40	35	19	29	25
MER21-int	0	0	0	1	0	0	0	0	0	0	0	0	0	0	0	1	1	2	0	0	0	0	0	0	0	0	0	0	0	0	0	0	0	0	0	0	0	0	0	0	0	0	1	0	0	0	0	1	0
MER21B	43	45	68	42	50	80	47	102	53	53	60	39	66	76	118	72	122	159	89	47	104	77	95	146	64	59	60	38	53	36	33	54	34	29	31	34	67	29	43	55	67	225	84	46	79	86	71	106	390
MER21C	569	645	676	572	752	422	514	552	544	869	820	1051	738	484	629	621	631	616	300	835	617	404	341	948	511	667	508	456	609	598	537	686	601	296	774	339	379	371	192	468	514	672	583	715	643	557	537	658	183
MER2B	7	10	8	13	16	12	12	6	11	10	16	17	16	11	13	6	24	19	12	10	8	13	6	21	26	20	12	9	11	9	6	10	10	7	9	5	10	4	5	13	14	31	15	9	13	11	18	21	7
MER3	88	109	95	61	87	44	50	59	64	72	102	106	146	65	101	95	133	123	120	115	89	75	78	169	91	58	85	47	75	84	81	83	41	56	84	47	61	40	37	66	81	109	88	88	88	94	119	122	110
MER31-int	0	0	4	0	0	8	0	0	2	7	0	1	0	4	0	5	14	5	4	0	0	0	8	3	3	0	3	1	3	1	0	3	4	1	1	1	7	0	2	0	2	8	0	0	1	0	0	3	0
MER31A	145	199	52	120	68	65	133	142	117	135	146	235	225	75	118	113	171	149	245	161	186	129	146	199	249	311	234	148	228	173	139	150	99	82	91	99	75	57	57	140	139	249	146	96	220	157	219	133	314
MER31B	127	97	167	63	65	39	54	70	55	105	84	170	246	170	253	178	215	199	225	121	64	132	68	216	32	48	18	27	35	43	44	48	35	17	39	26	36	17	18	36	42	41	41	23	66	60	65	91	152
MER33	617	791	585	643	557	314	532	520	473	690	694	904	1041	526	842	608	977	709	877	985	639	771	665	1107	593	745	686	523	702	653	557	613	445	308	512	402	569	371	280	503	525	983	629	651	668	748	828	880	321
MER34	8	8	5	6	6	2	2	7	6	2	3	7	13	4	10	7	15	21	10	12	6	11	7	6	8	2	5	3	3	4	2	2	2	3	0	1	11	6	2	9	3	17	5	10	2	10	9	28	20
MER34-int	0	0	1	0	0	4	0	0	0	0	0	0	0	0	0	0	3	3	1	1	1	0	0	0	1	1	0	0	0	0	0	0	0	0	1	0	0	0	0	0	0	0	1	2	0	0	4	0	0
MER34A	19	45	34	38	54	46	30	35	47	28	67	72	65	24	62	36	58	87	35	71	46	42	43	79	34	72	45	38	66	56	54	24	37	34	50	36	24	21	25	36	39	73	76	67	65	49	52	59	86
MER34A1	151	85	71	186	128	69	100	156	95	140	198	175	292	123	113	124	195	133	168	137	113	129	109	256	219	274	220	131	157	155	94	89	70	90	141	68	144	88	52	158	122	310	151	165	197	282	137	172	492
MER34B-int	132	194	129	131	101	72	135	183	120	193	246	315	208	80	113	107	134	109	180	230	193	146	99	253	150	238	189	94	204	277	150	224	154	121	305	210	118	63	85	177	95	235	191	184	186	207	311	238	20
MER44A	47	48	23	33	25	20	40	29	38	51	50	78	72	31	62	52	81	84	51	77	42	32	79	113	72	47	35	43	83	82	34	44	58	21	36	29	26	28	30	44	58	77	55	60	45	67	60	59	72
MER44B	186	193	140	180	104	67	152	147	159	146	184	200	377	150	168	168	253	219	230	188	127	128	81	214	127	177	136	92	100	126	120	108	72	74	134	87	81	57	50	119	88	156	152	112	183	155	163	131	166
MER44C	174	221	231	196	132	171	148	313	161	211	258	377	276	179	235	252	203	194	198	210	234	276	143	356	142	164	184	153	121	173	156	130	126	109	117	73	156	71	76	183	150	214	205	132	171	226	182	137	87
MER44D	29	32	33	17	32	25	23	28	18	25	32	34	52	26	30	12	50	40	40	30	15	27	48	38	27	54	39	22	40	17	25	31	13	19	33	20	32	16	22	15	15	29	28	21	14	41	30	59	24
MER45A	0	0	3	2	1	3	2	1	0	0	3	1	1	4	2	1	8	15	0	1	5	1	4	3	1	2	6	1	1	2	1	2	0	3	0	0	0	1	1	2	2	3	3	3	2	2	1	8	35
MER45B	16	24	7	3	8	5	11	10	13	24	5	15	7	2	1	8	6	22	11	10	12	8	1	2	5	8	4	6	5	11	6	2	6	0	4	4	14	3	3	18	5	12	13	4	8	0	9	34	24
MER45C	0	4	0	0	1	5	3	1	4	3	2	1	4	0	18	3	6	10	9	4	2	3	9	2	4	3	5	0	2	0	1	6	3	4	4	0	4	3	4	2	1	4	10	4	1	3	2	3	0
MER45R	5	17	1	0	0	7	6	12	1	6	13	11	5	0	7	9	12	9	7	2	5	6	4	0	2	0	6	1	3	3	11	6	9	3	0	0	14	7	0	4	3	6	1	3	7	0	3	3	5
MER46C	44	71	71	40	40	38	47	34	21	67	76	83	139	97	78	109	149	103	138	142	73	68	76	136	65	41	73	35	61	71	37	41	36	35	41	13	73	23	44	53	93	127	90	79	75	61	90	83	66
MER47A	0	0	0	5	0	0	0	7	0	0	0	0	0	0	0	3	0	2	4	0	1	0	2	4	1	0	0	0	0	0	0	0	1	0	0	0	0	1	0	5	1	9	0	11	3	0	2	2	0
MER47B	5	7	11	7	12	5	9	13	3	11	8	20	10	5	20	5	13	14	7	18	3	7	11	7	2	23	6	9	13	3	8	5	9	0	8	2	4	3	1	3	5	12	4	12	11	2	11	17	9
MER49	10	2	13	3	0	1	5	4	2	3	5	2	21	7	0	5	10	5	2	5	3	0	0	1	3	10	2	1	1	0	3	1	2	0	1	5	0	0	0	0	2	0	2	0	1	0	5	1	0
MER4B-int	0	0	0	0	0	0	0	0	1	0	0	0	0	0	0	0	0	0	0	1	0	0	0	2	0	0	0	0	0	0	0	0	0	0	0	0	1	2	1	0	0	1	0	0	1	0	0	0	0
MER4CL34	0	0	0	0	0	0	0	0	0	0	0	0	0	0	0	0	0	0	0	0	0	0	0	0	0	0	0	0	0	0	0	0	1	0	0	0	0	0	0	0	0	0	0	0	0	0	0	0	0
MER50	164	208	206	210	102	77	104	179	140	210	209	270	277	132	255	135	218	241	161	175	175	145	93	280	156	159	130	104	112	142	109	150	100	97	161	111	97	51	86	143	154	182	119	87	110	149	167	118	95
MER50-int	0	0	0	0	0	0	0	0	0	0	0	0	0	0	0	0	1	0	0	0	0	0	0	0	0	0	0	0	0	0	0	0	0	0	0	0	0	0	0	0	0	0	0	0	0	0	0	0	0
MER50B	0	0	0	0	0	1	0	0	1	0	0	1	1	0	0	0	1	0	0	1	0	0	0	0	3	1	1	0	0	0	1	2	0	0	1	0	0	0	0	0	0	2	0	2	0	0	4	0	0
MER51-int	0	0	0	0	0	0	3	2	1	0	0	3	0	0	2	0	1	1	0	0	0	0	0	0	3	0	0	0	0	0	0	0	1	0	0	0	0	0	0	0	2	0	0	6	0	0	1	1	0
MER52-int	0	0	0	0	0	0	0	0	0	0	0	0	0	0	0	1	3	3	0	0	0	0	0	0	0	0	1	0	0	0	0	0	0	0	0	0	0	0	0	0	1	0	0	0	0	0	0	4	1
MER53	1491	1683	1363	1476	1017	655	1014	1080	992	1230	1648	2074	2393	1255	1695	1457	1987	1562	1829	1542	1295	1204	986	1966	1168	1178	1135	786	1146	1226	969	985	838	598	1007	798	842	660	542	888	995	1610	1054	964	1279	1210	1269	1172	341
MER54A	724	863	627	736	456	305	465	436	393	667	759	818	1412	670	1011	908	1028	797	1013	753	663	457	425	977	539	637	470	450	574	508	453	509	501	307	553	501	381	306	205	445	426	805	724	619	520	644	661	720	287
MER54B	50	31	9	36	41	20	22	52	16	48	45	28	41	27	46	18	39	48	45	30	32	21	22	35	36	23	39	46	63	33	21	28	19	15	21	17	20	24	18	20	23	30	24	17	35	30	38	16	28
MER57-int	2	2	4	0	1	3	0	3	4	1	1	0	1	0	3	1	12	5	2	1	0	2	2	2	0	0	0	2	0	0	0	0	1	2	1	1	0	1	0	0	0	1	3	3	2	2	0	3	1
MER57C2	8	6	6	8	15	10	19	9	15	18	20	33	10	1	4	8	15	22	11	14	16	29	15	28	21	22	10	21	19	23	4	15	23	7	25	15	32	21	10	17	20	22	15	19	17	14	28	54	7
MER57D	70	87	89	89	48	52	69	139	75	33	41	74	140	84	102	104	79	103	53	61	85	80	96	98	74	87	76	39	68	27	68	38	27	21	35	22	41	28	23	51	61	97	82	47	76	75	62	41	266
MER57E1	7	1	13	2	5	5	4	1	2	5	3	13	15	9	14	8	19	20	12	10	10	5	13	13	0	0	6	2	10	1	13	4	4	0	0	2	6	6	6	3	4	11	9	13	10	7	11	14	7
MER57E2	27	37	28	27	24	19	42	54	25	54	37	46	88	24	50	49	56	62	62	55	46	38	44	97	45	69	55	17	39	51	25	56	43	27	49	40	32	16	15	46	29	91	51	27	42	98	105	55	40
MER58A	562	638	580	569	484	270	409	398	306	539	628	766	864	458	694	579	669	534	602	643	381	407	402	784	505	486	408	322	524	541	447	410	339	236	421	317	414	284	211	364	343	471	436	468	458	502	450	526	290
MER58B	302	399	235	251	217	157	264	287	254	303	352	347	445	203	258	245	275	284	276	337	270	223	200	371	391	430	282	232	349	233	297	271	218	152	222	160	246	165	118	177	310	438	250	331	353	294	275	415	329
MER58C	116	115	117	123	129	58	63	76	48	117	136	274	190	137	210	192	234	203	231	239	138	160	137	155	66	57	35	52	46	89	78	80	78	42	79	49	99	80	37	90	55	105	62	90	64	80	63	104	137
MER58D	680	824	582	633	468	248	442	474	269	616	755	1048	1090	452	1006	723	790	704	590	771	498	619	403	813	579	517	355	640	742	704	708	701	492	358	550	395	551	380	324	511	527	823	618	941	446	646	593	586	2
MER5A	585	690	711	629	540	408	570	629	533	612	600	839	1084	619	740	708	814	768	649	832	683	774	509	946	732	938	766	486	642	505	498	623	490	390	685	442	491	314	371	561	613	1028	682	731	756	848	868	720	523
MER5A1	438	422	482	400	391	257	303	294	254	378	353	505	812	450	692	646	718	807	616	626	384	411	474	740	297	269	249	221	320	296	332	247	283	142	230	219	243	273	106	252	265	469	353	343	298	335	336	515	438
MER5B	298	314	351	295	332	279	261	300	272	336	378	471	644	378	460	439	594	487	498	516	478	384	313	659	335	350	268	204	268	248	290	247	265	183	291	232	318	196	199	316	353	617	463	403	453	576	393	466	289
MER5C	5	5	2	5	6	4	5	8	2	15	9	12	17	11	4	7	14	13	3	11	3	10	5	7	11	15	8	12	11	11	5	6	7	1	6	4	8	10	9	8	12	20	15	11	4	11	5	17	19
MER5C1	0	0	2	0	0	0	5	0	4	2	1	0	0	0	0	0	0	1	0	0	0	5	2	1	3	0	0	0	4	0	0	0	0	0	4	0	0	0	0	0	2	1	0	1	0	0	1	0	0
MER63A	9	8	13	10	4	3	3	8	5	13	8	9	11	7	12	20	27	22	27	19	10	7	10	18	2	8	4	5	6	6	4	4	0	2	11	3	4	4	5	2	11	21	13	10	12	3	6	16	25
MER63B	41	32	30	24	48	25	34	42	18	42	36	49	40	27	34	34	59	29	41	56	32	28	17	60	32	30	30	28	32	34	47	40	47	11	36	27	46	13	21	18	51	60	53	68	47	34	35	47	25
MER63C	49	41	31	46	23	21	20	34	24	44	63	84	70	35	40	73	65	81	94	64	59	56	33	80	47	30	31	43	15	31	22	24	20	8	31	18	38	37	32	49	36	55	28	44	17	28	56	74	61
MER63D	17	54	29	11	29	16	17	17	13	35	24	33	52	20	32	19	29	35	36	46	24	23	21	26	28	29	29	22	21	16	27	10	31	12	33	15	23	14	11	14	39	24	24	19	27	28	59	25	48
MER65-int	1	1	0	0	0	0	0	2	3	3	0	0	1	2	1	0	2	3	3	1	3	3	9	2	0	1	0	0	3	2	1	2	1	0	0	0	1	0	0	0	2	0	1	0	1	1	1	5	3
MER65D	0	0	0	1	1	0	2	1	0	2	3	0	6	2	0	0	5	6	9	5	1	0	1	3	4	1	2	2	6	0	0	1	1	0	0	2	0	0	3	2	4	6	0	3	0	3	2	6	2
MER66-int	0	0	2	0	0	0	0	0	1	0	0	0	0	0	2	1	0	0	0	0	0	0	0	0	0	0	2	0	0	0	0	0	0	4	0	0	0	0	0	0	0	0	0	0	0	0	3	0	2
MER67A	7	1	4	0	1	1	0	0	0	0	0	0	0	0	3	0	1	6	0	4	1	0	0	0	0	0	1	0	0	0	0	0	0	0	1	1	0	0	0	0	0	0	0	1	1	0	0	7	2
MER67B	1	2	0	0	0	5	0	0	0	1	1	5	0	0	5	0	12	10	2	0	0	7	0	1	3	3	1	1	2	1	1	2	0	0	0	0	0	0	0	7	1	2	2	0	0	3	0	4	0
MER67C	282	390	314	306	191	103	161	195	130	292	355	393	465	254	317	264	389	281	245	260	125	163	128	241	176	286	181	194	306	242	223	232	180	106	201	130	114	104	70	136	115	169	143	168	145	177	171	212	189
MER67D	1	2	5	1	0	5	1	2	3	3	3	2	1	3	2	1	4	13	1	5	5	0	1	2	0	1	8	3	10	2	2	1	1	1	0	2	0	0	3	1	0	1	1	2	1	2	3	10	3
MER68	42	88	72	53	36	44	37	60	54	82	83	52	66	48	38	50	66	52	38	49	50	64	52	61	56	87	77	39	80	41	57	69	51	25	69	50	52	18	39	53	49	119	100	104	70	121	107	87	56
MER68-int	0	0	3	2	0	0	0	0	0	1	3	1	0	1	0	0	0	2	0	0	0	1	2	4	0	0	0	0	0	1	0	0	1	0	0	0	3	0	0	0	0	3	0	0	0	3	0	2	2
MER68B	35	50	16	59	27	20	37	22	18	32	28	19	41	9	14	25	27	28	12	27	36	21	18	61	41	29	26	58	44	34	20	25	28	15	23	9	22	27	17	29	36	62	37	54	66	47	23	49	21
MER68C	5	0	0	0	1	0	0	0	1	0	0	8	0	0	0	0	1	1	0	1	0	0	0	0	0	0	0	0	0	2	0	0	0	0	0	0	1	0	0	0	0	10	0	0	0	0	0	2	0
MER70-int	0	0	0	0	0	1	0	0	0	0	0	0	0	0	0	0	0	0	1	0	0	0	0	0	0	0	0	0	0	0	0	0	0	0	0	0	0	0	0	0	0	0	0	0	0	0	0	1	0
MER70A	6	32	17	13	9	4	14	26	29	35	37	12	49	13	21	8	22	24	6	36	18	11	3	17	9	35	11	9	23	7	11	27	12	13	19	24	1	4	10	16	4	24	18	25	12	27	31	22	28
MER70B	1	11	0	4	7	5	6	4	2	12	3	8	19	3	16	0	9	8	12	15	12	3	11	8	2	10	10	4	9	3	1	3	6	0	2	3	9	2	13	3	6	8	21	2	1	11	24	17	4
MER72	0	0	0	0	0	0	0	0	0	0	0	0	0	0	0	0	0	0	2	0	0	0	0	0	0	0	0	0	0	1	1	0	0	0	0	0	0	0	0	0	0	0	0	0	0	0	0	0	0
MER72B	0	0	0	1	0	0	0	0	0	0	0	0	0	0	0	0	0	0	0	0	0	0	0	1	0	0	0	0	0	0	0	0	0	0	0	0	0	1	0	0	0	0	0	2	0	1	0	2	0
MER73	20	25	40	30	20	12	24	34	26	34	29	49	36	18	28	20	48	27	19	28	32	28	18	37	18	16	17	13	23	12	31	21	10	7	14	6	23	9	10	23	11	21	17	11	15	31	24	20	13
MER74A	17	10	24	14	11	34	7	6	8	12	17	27	20	8	5	23	38	27	18	10	14	16	15	10	10	6	9	7	6	3	17	9	11	2	6	7	14	2	6	10	8	4	14	9	6	5	24	31	27
MER74B	7	13	3	2	1	12	4	4	1	5	6	17	2	3	0	5	15	14	15	6	1	10	2	7	7	2	10	5	2	1	1	2	1	1	11	9	4	9	1	5	3	23	8	13	3	4	4	20	6
MER74C	4	3	0	0	2	0	2	0	2	0	0	2	2	0	0	1	1	3	1	1	4	0	0	0	2	3	3	2	1	0	9	0	2	0	1	0	2	1	0	0	2	2	1	3	1	0	0	3	0
MER76	5	13	4	12	3	3	3	9	8	6	6	12	21	13	10	5	8	22	6	24	9	12	14	9	4	8	8	8	5	10	2	4	3	2	8	0	19	7	8	12	7	15	11	17	16	28	7	13	6
MER76-int	0	0	1	0	0	1	0	0	0	1	0	0	0	0	0	0	0	0	1	0	0	0	1	1	0	0	0	0	0	0	0	0	0	0	0	0	0	0	0	0	0	0	0	0	0	0	0	0	0
MER77	33	57	32	33	28	20	25	35	26	23	43	36	33	20	14	14	18	29	24	6	9	5	32	12	51	38	31	45	67	20	34	14	18	17	37	13	22	12	4	8	20	66	11	12	10	9	17	25	39
MER77B	2	0	4	1	2	6	0	4	3	3	0	0	6	4	4	4	10	15	0	11	3	4	0	1	0	4	2	1	5	6	3	0	2	0	4	0	4	3	0	4	6	2	1	6	2	5	5	16	23
MER81	5	14	2	5	6	3	3	5	5	3	7	5	5	7	6	9	12	15	15	13	14	8	1	10	3	4	3	3	2	10	1	1	3	1	4	2	4	6	2	5	5	15	9	5	5	13	9	20	14
MER87	0	0	0	0	0	0	0	0	0	0	1	1	0	0	1	2	1	4	0	1	3	0	0	1	0	5	4	0	1	1	1	0	1	0	1	1	1	0	0	0	0	0	0	0	0	0	2	1	3
MER88	0	1	0	0	0	0	0	0	0	0	2	0	0	0	0	0	2	4	0	1	0	0	0	1	0	0	0	0	0	0	0	0	0	0	0	0	0	0	1	1	0	6	4	3	0	2	2	8	0
MER89	7	13	6	19	3	9	9	9	2	3	16	13	7	4	11	11	14	18	14	15	5	11	13	13	18	18	5	6	7	7	2	4	5	2	7	6	11	2	7	3	11	14	7	24	4	8	5	21	2302
MER89-int	0	0	0	0	0	1	1	1	0	0	0	2	0	0	1	0	3	2	0	0	0	0	0	0	0	1	0	0	0	0	0	8	0	0	2	0	0	0	0	0	0	0	0	0	0	0	0	3	0
MER90	3	2	0	0	4	7	3	8	4	5	1	0	4	1	3	12	6	7	14	4	6	2	0	12	2	0	2	4	1	1	10	2	1	3	11	0	1	1	3	1	2	0	2	9	8	7	3	5	0
MER90a	126	127	47	70	94	47	104	113	76	91	136	139	132	62	123	89	114	96	120	176	103	102	84	236	186	114	86	126	162	134	95	146	92	44	84	70	134	114	39	88	182	213	119	233	138	102	117	124	107
MER91A	1049	1084	1009	999	1060	790	943	1322	824	1165	1322	2319	1453	596	1186	913	1132	871	877	1032	1136	1050	992	1785	710	820	733	650	971	891	801	632	556	379	518	478	748	467	382	734	578	1046	714	719	1038	968	1041	1000	162
MER91B	91	112	169	106	156	68	79	100	62	125	139	145	224	95	210	182	157	202	133	125	172	90	64	187	63	98	85	48	65	74	100	120	123	49	126	83	65	37	50	80	82	119	111	107	101	137	213	135	81
MER91C	0	1	0	0	1	1	0	0	0	0	0	0	0	0	0	0	0	1	0	0	1	0	0	0	0	0	0	0	0	0	0	0	0	0	0	0	0	0	0	0	0	0	1	0	0	0	0	1	0
MER92-int	0	0	0	0	0	2	0	0	1	0	0	2	2	8	4	3	2	9	3	1	1	0	0	4	2	1	3	2	1	0	4	2	0	0	1	2	1	0	0	0	0	3	1	0	4	0	2	9	0
MER92A	0	0	0	0	0	1	0	0	0	0	0	0	0	0	0	0	0	0	0	0	0	0	0	0	0	0	0	0	0	0	0	0	0	0	0	0	0	0	0	0	0	0	0	0	0	0	3	1	0
MER92B	8	22	6	6	9	11	5	0	5	4	1	8	8	0	0	4	8	8	0	7	6	5	3	3	10	13	1	7	6	10	4	3	0	6	8	0	1	0	3	5	2	10	8	6	3	9	1	20	17
MER92C	0	0	0	0	0	0	0	0	0	0	0	0	0	0	0	0	1	1	0	0	0	1	0	1	0	0	0	3	0	0	0	0	0	0	0	0	0	0	0	1	0	0	0	0	0	0	0	4	0
MER92D	0	0	0	0	0	0	0	0	0	0	0	0	0	0	0	0	1	5	0	2	0	0	0	0	0	0	1	1	0	0	0	0	2	0	0	0	0	0	0	0	0	0	0	0	0	0	0	4	5
MER94	9	16	5	5	1	6	4	8	6	9	9	2	9	17	14	6	15	14	0	7	8	7	2	6	6	8	6	0	7	11	19	8	5	5	14	8	4	0	2	0	9	17	4	12	15	10	27	17	197
MER94B	0	0	0	0	0	0	0	0	0	0	1	0	0	0	0	0	0	0	0	0	0	0	0	1	0	0	0	0	0	0	0	0	0	0	0	0	0	0	0	0	0	0	2	0	0	0	0	0	0
MER95	0	0	0	0	0	0	0	0	0	0	0	0	0	0	0	0	1	1	0	0	0	0	0	0	0	0	0	0	0	0	0	0	0	0	0	0	0	0	0	0	0	0	0	0	0	0	0	0	0
MER96	7	6	7	1	1	1	1	0	3	3	9	1	16	4	12	12	8	4	7	7	4	6	8	3	1	14	4	1	2	1	0	0	0	0	1	0	0	2	0	4	10	5	13	3	4	5	7	3	5
MER96B	60	101	88	44	76	71	81	98	52	70	110	89	81	36	72	86	79	90	83	134	84	98	43	118	89	115	69	73	108	67	50	86	59	49	107	60	62	45	46	107	108	114	96	88	72	100	89	89	51
MER97a	0	1	9	0	9	4	0	6	3	2	17	0	0	9	10	2	14	5	15	19	11	20	17	8	1	1	22	3	1	6	0	14	5	4	10	12	12	6	8	13	9	14	29	10	6	5	0	25	54
MER97b	18	9	24	18	19	9	14	17	12	15	16	17	15	9	15	9	21	18	25	31	15	22	4	38	7	11	11	14	15	35	20	18	14	4	9	9	7	7	9	7	8	17	18	20	12	15	22	25	5
MER97c	0	1	0	0	0	0	0	0	3	1	1	0	0	0	1	0	0	1	4	1	0	3	0	1	0	0	1	1	1	1	0	0	1	0	0	1	0	0	0	1	4	2	1	0	1	1	10	1	1
MER97d	3	0	0	0	0	0	0	0	2	0	1	4	3	0	0	0	0	0	0	0	0	0	0	2	1	2	1	0	0	0	1	2	0	0	1	0	0	0	0	0	0	0	0	4	0	0	0	2	0
MER99	30	42	50	54	29	17	21	25	25	20	39	44	54	10	28	29	37	34	44	28	14	33	18	43	23	29	19	9	19	18	38	26	7	7	28	18	10	4	2	19	10	57	10	12	33	16	31	20	17
MERV1_I-int	0	21	1	7	14	38	6	10	5	11	8	28	8	8	12	11	71	94	36	29	16	12	17	15	12	25	5	3	23	14	12	12	8	7	14	8	17	7	13	21	18	62	18	26	5	12	35	35	221
MERV1_LTR	6	12	5	4	4	17	6	8	10	3	11	19	10	2	4	6	17	19	12	14	9	4	2	16	4	12	7	4	5	6	6	9	5	4	12	4	7	3	7	21	14	19	12	12	28	32	26	18	39
MERVK26-int	106	178	58	133	120	115	80	160	89	81	130	191	194	104	76	102	128	125	89	127	129	78	77	187	133	145	116	103	103	133	134	86	79	50	99	43	114	59	62	153	148	169	149	207	137	135	153	153	83
MERVL-int	39	30	27	38	30	23	29	29	30	31	46	45	20	20	28	10	61	73	36	43	29	28	23	76	28	28	30	23	33	36	28	25	35	9	32	22	18	16	21	17	40	57	26	19	25	23	28	54	5013
MERVL_2A-int	173	312	275	363	258	188	198	249	192	297	393	523	456	268	413	484	600	507	603	472	392	530	317	744	280	290	238	212	254	298	291	205	252	181	285	134	389	236	129	278	438	506	246	410	451	365	384	583	857
MERX	0	0	1	0	0	0	0	0	0	0	0	0	0	0	0	0	0	1	0	0	0	0	1	0	0	1	0	0	0	0	0	0	0	0	0	0	0	0	0	0	0	0	0	0	0	0	0	2	5
MIR	3715	4956	4003	4162	3718	2381	2789	3620	2671	3903	4677	6332	6546	3604	5037	4856	6418	5035	5373	5265	3905	3981	3039	6464	3702	3949	3369	2756	3334	3718	3144	3476	3157	2060	3646	2311	2985	2047	1828	3130	3290	5522	4229	3839	3876	4109	3894	4319	2887
MIR3	2781	3288	2434	2710	2709	1654	2281	2601	1991	2761	3226	3423	4087	2171	3076	2804	3630	3310	2866	3824	2746	2612	2193	4418	2753	3173	2499	2403	2928	2607	2626	2292	2360	1366	2515	1755	2094	1757	1184	2166	2514	4030	2759	2945	2655	3117	2770	3029	1773
MIRb	3188	3944	3235	3313	2950	2097	2473	3179	2447	3179	4016	4630	5247	2835	4120	3347	4816	4472	4274	4383	3405	3138	2768	5252	3265	3694	3082	2448	3337	3409	2830	3013	2634	1721	2964	2265	2887	1875	1532	2679	2883	4698	3273	3434	3461	3783	3579	4442	2921
MIRc	3502	4121	3399	3683	3327	2037	2791	3413	2696	3772	4232	5341	6219	3313	4546	3971	5151	4626	4836	4706	3967	3996	3205	6330	3352	3669	2952	2355	3462	3390	3132	2970	2798	1538	2906	2080	3209	2224	1655	2787	3133	4746	3415	3510	3808	3960	4136	4484	2417
MLT-int	259	236	132	240	242	149	162	133	120	171	153	261	233	220	293	199	278	282	189	354	256	206	295	609	204	183	134	184	250	154	272	136	138	84	101	132	242	205	90	173	202	303	199	315	223	279	216	383	44
MLT1-int	1	19	21	36	17	19	18	22	27	12	9	24	13	28	33	29	11	30	15	46	60	23	35	51	24	26	19	3	18	15	6	28	21	20	26	17	22	4	12	40	26	33	34	35	29	32	36	32	20
MLT1A	129	156	143	122	108	104	122	161	92	155	167	212	214	86	97	114	224	214	161	202	197	168	88	198	175	172	219	107	135	162	115	135	102	66	156	103	131	82	86	109	170	329	182	176	178	195	220	238	275
MLT1A-int	3	0	0	0	0	1	0	0	1	0	0	0	0	0	1	0	2	4	0	0	0	2	0	0	0	0	0	0	2	0	0	3	3	0	6	0	0	0	3	4	0	1	1	3	1	0	1	4	0
MLT1A0	449	708	553	538	524	394	512	611	599	594	622	755	796	443	700	571	801	685	663	738	672	467	414	987	675	1069	702	420	621	565	405	606	612	338	691	590	442	274	329	688	685	966	818	752	618	768	1129	854	536
MLT1A0-int	0	1	0	0	1	8	0	0	0	1	2	0	6	3	0	1	6	7	0	0	0	0	0	0	0	5	4	0	0	0	0	0	0	0	3	0	0	0	0	0	3	0	0	0	0	0	0	4	0
MLT1A1	337	415	340	299	306	209	301	330	266	384	353	494	672	297	396	377	553	463	430	480	349	337	282	601	357	429	361	206	288	270	250	317	197	194	240	208	243	195	153	265	335	542	360	437	329	350	493	542	510
MLT1A1-int	0	0	0	0	1	6	0	1	0	0	0	1	0	2	0	0	2	2	4	3	6	0	1	0	0	0	0	0	2	0	1	0	0	0	0	0	1	4	1	0	0	0	0	0	0	0	1	3	0
MLT1B	401	413	429	381	399	315	321	437	372	455	502	634	651	351	527	387	627	593	464	529	423	470	317	693	416	524	445	363	463	427	341	378	366	252	363	339	297	222	200	395	423	596	404	432	501	653	508	550	482
MLT1B-int	1	3	8	0	5	1	0	0	2	4	7	7	3	5	9	3	6	13	16	2	2	4	3	0	0	3	0	2	1	4	1	2	5	1	5	2	1	2	0	2	1	5	2	0	8	5	0	8	0
MLT1C	301	358	192	278	245	211	290	358	273	284	369	318	502	158	167	187	416	384	311	323	289	251	286	377	554	598	524	324	389	303	320	309	204	186	328	170	248	215	154	336	501	615	406	421	465	404	399	446	514
MLT1C-int	0	0	3	0	5	3	0	0	0	0	1	1	0	7	18	7	14	6	12	2	2	7	4	8	0	0	0	0	0	2	0	0	0	0	0	0	0	0	1	0	1	1	0	0	0	2	0	6	0
MLT1D	385	569	336	511	436	326	416	489	436	461	588	655	642	349	426	366	598	714	480	601	505	501	341	926	768	823	622	452	604	454	569	496	466	283	500	330	521	363	229	461	710	985	651	706	634	644	627	756	807
MLT1D-int	28	16	14	15	38	11	9	6	30	18	20	14	44	19	9	4	47	17	1	23	35	19	8	11	14	8	12	4	7	5	17	15	22	7	29	10	6	5	8	11	14	14	17	21	28	14	18	24	0
MLT1E	20	27	24	24	23	18	14	22	17	12	31	53	26	25	61	31	27	63	69	75	59	40	25	55	15	43	26	17	19	15	17	12	22	6	15	14	27	15	15	16	28	31	16	29	36	26	20	58	74
MLT1E1	203	210	205	205	154	125	193	243	161	209	296	351	322	197	165	213	179	189	168	220	187	177	114	324	180	168	156	128	142	178	146	129	138	87	126	70	139	71	69	162	177	205	175	145	157	215	187	130	81
MLT1E1-int	0	0	2	0	1	0	0	0	0	0	0	2	0	0	1	0	0	1	4	3	0	0	0	0	0	0	0	0	0	0	0	0	0	0	0	3	1	0	2	0	0	0	4	0	0	5	2	0	0
MLT1E1A	20	102	48	35	43	46	35	73	46	45	42	46	49	27	52	54	65	75	66	52	68	45	33	94	35	84	50	31	45	35	19	27	29	32	56	36	24	27	26	39	20	74	72	69	79	76	86	50	48
MLT1E1A-int	0	0	1	0	0	1	0	3	0	4	0	0	0	4	3	0	0	2	0	5	0	0	0	0	0	0	0	0	0	0	0	0	0	0	0	0	0	0	0	3	0	0	4	0	0	0	1	0	0
MLT1E2	76	108	141	75	84	86	62	104	86	133	165	217	172	102	114	94	175	130	86	122	99	93	56	209	100	136	85	58	80	92	65	85	66	62	147	70	57	45	45	63	88	140	91	110	85	106	107	109	72
MLT1E2-int	0	0	0	0	0	0	0	0	0	0	0	0	0	0	0	0	2	0	0	0	0	0	0	0	0	0	0	0	0	0	0	0	0	0	0	0	0	0	0	0	1	0	0	0	0	0	0	0	0
MLT1E3	97	85	50	78	54	34	57	55	60	104	93	101	129	47	91	56	90	68	85	70	37	77	71	83	68	75	55	67	70	54	52	57	48	27	44	44	40	31	21	28	56	117	32	54	62	120	84	111	53
MLT1E3-int	0	0	0	0	0	0	0	0	0	0	0	0	0	0	0	0	0	0	0	0	0	0	0	0	0	0	0	0	0	0	0	0	0	0	0	0	0	0	0	0	0	0	0	0	0	0	0	0	1
MLT1F	225	148	197	252	131	85	124	130	97	115	163	208	381	224	221	260	316	253	281	289	225	289	239	286	100	143	95	76	93	127	102	85	55	48	75	50	127	94	70	124	152	298	197	105	244	191	198	237	238
MLT1F-int	2	4	1	0	6	6	2	3	0	0	2	1	6	0	0	6	4	7	0	3	2	0	4	6	3	8	1	1	2	1	0	2	1	0	0	0	2	0	0	5	0	5	4	5	3	1	2	5	5
MLT1F1	125	99	74	135	126	58	88	83	52	104	171	205	162	112	182	135	153	164	185	171	94	105	127	211	84	86	90	76	70	108	95	75	76	34	79	54	80	63	66	109	88	106	66	97	104	99	115	154	22
MLT1F1-int	0	0	0	2	0	1	0	0	0	0	0	0	0	0	0	0	8	1	0	0	0	0	0	0	0	0	0	0	0	1	0	0	0	0	0	0	0	0	0	0	0	0	0	0	0	0	0	0	0
MLT1F2	256	341	222	304	206	100	179	226	198	225	261	300	398	223	229	255	304	294	378	328	284	305	176	372	306	382	204	197	257	248	242	246	206	131	296	150	253	157	138	185	201	271	252	259	295	322	338	383	189
MLT1F2-int	6	7	20	6	13	5	6	6	15	12	7	8	7	5	5	9	13	11	11	8	6	5	5	9	4	19	12	2	11	6	1	22	5	3	17	15	4	5	6	4	4	6	5	7	6	3	33	6	4
MLT1G	19	20	37	32	38	35	31	44	13	34	55	37	39	38	59	47	73	61	43	48	65	14	29	47	23	43	39	14	16	38	19	27	10	13	39	25	13	11	17	19	28	51	29	33	49	46	63	70	55
MLT1G-int	0	0	0	0	1	0	1	0	0	0	0	1	1	1	2	0	1	0	0	0	0	1	0	0	0	2	0	0	0	0	0	0	0	0	1	0	1	0	0	0	0	0	0	0	1	0	0	1	1
MLT1G1	17	27	17	24	16	14	17	23	16	38	31	21	62	31	23	60	85	43	32	28	41	16	21	34	34	24	23	8	35	16	10	22	19	8	11	13	31	21	9	27	16	57	29	48	26	40	26	68	61
MLT1G1-int	4	0	0	0	0	4	1	0	4	0	0	0	0	3	15	3	14	0	2	6	1	0	4	9	19	1	13	0	6	0	0	5	1	0	0	0	9	7	7	4	8	0	6	11	3	8	0	16	0
MLT1G3	67	117	100	90	51	42	80	83	51	74	49	63	165	124	143	106	146	171	93	82	76	105	86	178	56	81	67	37	51	28	38	42	37	36	50	32	85	30	25	69	48	73	65	64	80	117	77	80	97
MLT1G3-int	39	34	26	31	23	12	31	40	8	21	20	37	96	27	56	23	78	52	66	34	20	47	19	58	37	31	22	13	14	5	19	27	27	7	22	16	22	6	14	28	17	21	11	10	48	34	27	29	28
MLT1H	42	49	51	36	37	29	34	27	30	39	49	46	94	26	140	56	144	122	62	64	61	39	46	80	27	39	25	34	35	39	25	28	17	16	38	28	22	26	24	42	40	106	52	43	35	71	81	120	78
MLT1H-int	605	717	426	637	534	254	413	289	219	546	690	949	830	377	612	624	741	687	516	675	320	480	454	804	341	216	202	345	415	331	469	257	314	129	239	187	273	316	98	232	334	407	293	392	295	334	294	439	128
MLT1H1	29	44	61	40	63	43	52	38	47	107	101	121	63	45	40	53	104	72	57	104	66	83	80	125	90	133	45	56	47	96	37	57	115	45	80	78	72	53	30	61	115	139	112	143	54	98	117	193	35
MLT1H1-int	2	5	2	8	0	1	10	3	4	8	5	4	0	4	7	12	0	0	1	7	1	2	7	17	5	6	0	1	9	8	5	0	6	0	4	9	8	1	0	7	1	12	4	6	1	10	1	1	0
MLT1H2	23	22	14	13	18	15	18	19	11	9	20	34	30	10	28	20	40	46	24	33	29	19	21	35	25	19	19	17	19	17	31	19	11	16	19	14	31	9	16	18	20	58	22	20	17	26	17	31	68
MLT1H2-int	0	0	0	0	0	0	0	0	0	0	5	0	0	0	0	0	1	4	0	0	0	0	0	0	0	0	0	0	0	0	0	0	0	0	0	0	0	1	0	0	0	0	0	0	0	0	0	3	0
MLT1I	67	57	59	59	44	38	47	57	59	61	51	77	80	40	70	56	102	87	48	59	51	45	45	97	60	65	59	34	39	41	42	41	37	30	36	28	50	29	32	49	62	46	51	60	59	50	58	76	112
MLT1I-int	0	0	0	0	0	0	0	0	0	0	0	0	0	1	0	0	1	3	0	0	0	0	0	0	0	0	0	0	0	1	0	0	0	0	0	0	0	0	0	0	0	0	0	1	0	0	0	1	0
MLT1J	698	843	724	755	632	401	616	658	547	813	937	1133	1169	613	916	812	946	892	888	941	873	718	676	1131	907	1045	874	586	852	708	670	753	701	391	742	557	626	451	383	657	655	1246	782	953	695	852	943	1025	1005
MLT1J-int	23	38	30	31	12	24	19	27	16	54	18	14	42	10	20	25	26	30	47	18	85	28	24	51	21	77	43	26	27	8	2	30	32	10	34	10	34	20	24	41	13	66	58	56	49	53	84	88	46
MLT1J1	89	152	137	127	194	91	162	143	90	170	225	269	205	124	140	161	221	134	122	157	109	148	111	122	200	169	81	144	132	171	141	127	179	68	139	86	92	79	55	133	213	147	164	161	155	116	139	137	130
MLT1J1-int	16	18	0	5	2	2	2	6	3	9	2	0	7	1	20	1	5	10	8	3	6	8	4	5	7	12	21	5	7	2	8	3	2	14	1	3	6	2	4	5	15	23	4	2	16	17	10	1	33
MLT1J2	18	25	27	50	33	31	17	23	44	30	46	47	46	35	41	48	52	51	26	75	56	27	35	33	29	25	22	12	22	21	14	26	25	25	17	16	22	10	17	29	44	37	44	29	31	25	66	85	66
MLT1J2-int	0	0	0	0	0	1	0	0	0	0	0	0	0	0	0	0	0	1	0	0	0	6	0	0	0	0	0	0	0	1	0	0	0	0	0	0	0	0	0	0	0	0	0	0	0	0	0	0	0
MLT1K	125	180	123	157	141	84	131	141	129	172	183	209	225	114	148	104	222	193	144	164	176	141	147	250	149	197	163	117	163	119	144	138	120	84	138	102	118	81	85	141	236	397	267	217	228	168	206	239	363
MLT1K-int	0	0	0	0	0	0	0	0	0	0	0	0	0	0	0	0	0	0	0	0	0	0	0	0	0	0	0	0	0	0	0	0	0	0	0	0	0	0	0	0	0	0	0	0	0	0	2	0	0
MLT1L	522	794	411	694	659	411	492	635	447	585	654	1221	818	586	726	596	660	786	678	644	616	607	511	1164	864	730	684	510	543	509	512	670	655	405	523	376	713	488	251	517	583	839	750	886	795	958	734	842	319
MLT1L-int	0	0	0	0	0	0	0	0	0	0	0	0	0	0	0	0	0	0	0	0	0	0	0	0	0	0	0	0	0	0	0	0	0	0	0	0	0	0	0	0	0	0	0	0	0	0	0	0	0
MLT1M	62	102	32	45	41	55	54	71	35	65	52	68	81	42	88	52	61	82	77	61	97	82	67	93	63	57	68	42	42	39	41	57	29	33	33	35	71	23	31	45	56	105	39	46	51	67	42	68	103
MLT1N2	20	23	7	15	7	11	28	14	12	9	26	13	41	3	17	8	12	23	6	11	5	7	8	22	13	18	12	15	18	26	28	10	16	11	22	7	7	13	1	15	15	24	14	13	9	20	16	10	3
MLT1N2-int	0	0	0	0	0	0	0	0	0	0	0	0	0	0	0	0	0	0	0	0	0	0	0	0	0	0	0	0	0	0	0	0	0	0	0	0	0	0	0	0	0	0	0	0	0	0	0	0	22
MLT1O	4	1	1	0	3	4	3	2	2	3	5	2	9	1	2	0	14	13	6	4	1	0	3	12	2	15	1	3	2	6	3	4	4	7	10	0	3	0	3	0	7	11	7	0	1	4	11	19	9
MLT2B1	26	24	36	3	6	12	18	11	18	15	19	18	34	12	22	27	50	46	16	36	17	12	30	39	11	10	6	16	11	31	6	17	12	13	18	12	12	20	21	15	40	30	14	32	34	24	29	46	47
MLT2B2	134	91	64	113	149	75	175	169	169	158	176	153	290	99	120	88	151	125	131	192	156	240	144	258	420	445	379	163	323	149	101	165	139	106	154	120	201	97	115	164	278	564	179	322	313	245	164	263	713
MLT2B3	21	19	7	18	19	31	10	13	14	28	28	14	21	12	32	42	85	45	60	40	46	18	26	46	15	25	8	7	11	32	39	20	30	21	47	17	7	6	9	11	26	61	23	27	8	11	40	73	37
MLT2B4	80	112	115	71	58	57	65	90	72	72	49	118	110	99	102	88	126	146	115	83	149	93	94	135	96	82	73	44	56	65	53	55	44	41	64	36	60	50	30	117	91	166	103	99	109	136	140	140	125
MLT2B5	142	33	51	40	43	47	39	50	29	67	83	84	138	90	203	141	149	99	178	85	70	88	82	119	43	49	42	28	29	48	57	51	45	39	34	43	38	31	14	27	34	73	45	42	41	53	46	74	11
MLT2C1	11	6	7	0	9	7	2	3	13	9	0	2	5	6	7	10	28	17	7	21	16	11	8	5	7	12	6	2	8	12	6	1	6	5	0	5	14	7	5	7	15	14	17	4	7	9	14	14	12
MLT2C2	7	2	2	15	4	8	14	7	13	18	15	21	16	3	5	13	8	12	2	5	11	5	2	11	13	2	3	3	2	3	3	10	6	8	19	5	0	4	2	10	2	19	14	19	6	5	20	13	0
MLT2D	28	40	50	47	20	29	16	25	28	43	53	42	68	25	40	28	62	68	69	46	40	26	25	59	42	66	35	26	44	41	35	23	24	31	49	25	22	24	14	45	53	67	67	54	56	49	89	64	29
MLT2E	2	4	0	0	0	1	1	0	0	0	0	0	2	4	4	0	3	3	0	10	15	0	8	0	0	0	0	1	3	2	2	1	2	0	3	0	4	6	2	0	0	3	5	1	1	9	0	8	8
MLT2F	92	229	226	133	146	193	254	154	141	146	141	157	162	116	163	343	329	332	578	303	355	221	234	335	284	488	348	138	275	116	113	143	94	78	160	142	157	125	104	312	599	1253	798	461	645	319	373	213	511
MLTR11A	8667	9235	5590	7983	6548	3406	6755	6993	5095	7604	7950	10213	10868	5305	7202	6051	8198	5853	6263	6367	4772	6058	5285	11120	9523	10659	9073	6700	12007	7996	7725	6470	5333	3232	5548	4260	6639	4297	2677	4867	5433	9501	6323	7709	7380	6431	7732	7809	3176
MLTR11B	8406	10125	6632	9966	8307	3732	6843	7994	5648	7496	10882	12184	13324	7001	10754	7607	11560	7955	10182	11264	7021	8162	6971	13857	9569	11100	8526	9064	12733	11659	9936	9681	7850	4625	9527	6785	7973	5612	4034	7901	7144	11279	9886	10392	8821	10855	10780	10663	4018
MLTR12	4	25	2	12	21	18	14	27	15	7	16	14	53	46	112	15	74	97	54	60	54	57	107	71	30	32	28	13	22	6	0	14	9	6	13	36	70	44	46	14	58	36	8	22	34	34	71	226	75
MLTR13	0	13	0	0	11	3	5	1	1	9	10	0	11	2	0	1	3	10	14	15	6	3	5	14	4	1	5	0	0	6	0	0	9	13	0	9	2	12	2	1	11	9	6	6	6	3	4	30	20
MLTR14	680	802	616	805	531	440	590	522	426	491	664	769	1018	559	805	814	1119	856	833	655	452	625	464	946	544	585	403	379	528	442	430	399	361	201	308	233	376	359	179	380	358	644	534	493	450	554	436	618	400
MLTR18A_MM	0	4	2	6	11	7	10	10	5	6	7	19	10	1	0	0	7	15	5	5	10	8	7	5	9	28	11	4	4	10	25	3	13	14	17	4	0	4	0	0	9	7	14	1	4	5	5	8	21
MLTR18B_MM	73	156	209	108	138	112	115	236	137	241	88	130	98	88	105	79	146	150	178	238	202	117	38	301	186	310	236	88	168	186	101	173	174	92	252	156	121	44	71	275	214	316	344	242	210	303	439	216	86
MLTR18C_MM	34	8	32	16	4	20	6	27	11	21	23	40	16	6	28	6	43	50	24	25	16	16	12	25	19	3	9	19	8	16	18	25	13	1	24	1	5	8	5	6	14	34	18	15	32	3	56	30	6
MLTR18D_MM	4	1	3	4	1	4	1	1	1	7	5	4	10	1	0	6	34	33	6	4	10	0	9	2	5	7	1	0	4	0	0	5	0	0	16	2	5	1	6	2	25	11	10	1	1	7	1	21	6
MLTR18_MM	1	19	12	11	7	7	7	11	22	7	7	12	5	14	21	20	26	21	18	11	12	13	9	9	22	24	29	9	10	7	3	6	5	3	4	13	3	4	11	13	15	9	16	17	11	15	12	35	29
MLTR25A	21	33	22	28	22	326	16	34	25	30	26	40	47	23	45	38	199	140	52	38	19	42	28	50	32	43	33	21	41	38	8	33	12	23	36	15	17	13	10	24	22	46	24	36	21	20	58	305	84
MLTR25C	0	9	0	3	2	2	3	9	6	5	1	3	7	0	7	10	12	23	2	9	13	1	3	8	3	9	9	3	9	3	4	5	7	7	13	6	4	1	0	11	1	10	5	5	12	2	5	12	35
MLTR31A_MM	0	5	7	1	0	8	2	3	1	3	2	5	5	1	0	0	10	14	3	3	12	0	5	9	3	7	5	3	3	5	7	1	1	4	4	3	4	0	3	3	15	12	3	1	6	2	15	24	7
MLTR31C_MM	0	4	8	0	4	4	0	7	4	4	4	5	2	0	5	1	10	15	6	5	4	1	1	8	9	12	9	0	6	4	1	0	6	5	6	0	6	5	1	1	3	3	1	18	4	5	4	1	28
MLTR31D_MM	0	3	5	1	1	4	8	1	8	9	6	5	2	2	4	2	16	17	3	2	8	2	2	4	7	6	6	2	6	2	0	4	9	6	3	4	1	5	0	4	5	0	0	1	4	4	2	9	43
MLTR31E_MM	0	0	0	1	0	0	0	0	0	2	1	0	1	0	0	7	4	3	2	3	3	0	0	1	6	2	4	0	0	0	0	3	3	1	1	0	2	0	0	2	5	4	2	1	0	1	0	3	3
MLTR31FA_MM	9	5	19	8	8	13	11	1	7	7	13	9	45	0	10	12	18	24	5	8	20	14	4	20	10	16	20	2	7	6	14	21	0	4	34	1	6	6	7	9	16	17	7	15	16	14	21	16	11
MLTR31F_MM	42	42	19	22	13	23	32	27	23	32	48	39	45	13	30	26	39	26	25	42	38	25	25	52	34	43	48	28	49	38	23	32	26	17	31	21	22	20	19	23	27	63	50	36	27	23	35	40	94
MLTR32C_MM	0	0	0	1	2	6	1	1	2	3	0	0	0	1	0	0	6	10	0	0	1	0	0	1	1	0	3	1	1	2	2	1	4	0	1	0	1	0	0	0	1	2	1	2	1	0	0	9	0
MLTR73	44	33	25	36	43	26	28	17	21	15	35	36	69	48	45	28	57	55	23	33	23	31	18	24	15	11	29	28	17	34	29	31	8	11	19	11	23	18	8	25	40	41	47	22	32	36	40	57	28
MMAR1	17	24	32	57	39	37	34	17	39	33	64	55	113	8	29	23	49	69	56	71	52	34	18	64	13	45	40	41	35	70	54	34	49	12	61	14	26	12	23	67	58	33	27	68	40	41	46	35	72
MMERGLN-int	194	302	233	171	185	91	130	251	176	312	184	143	231	106	165	119	185	247	444	246	234	280	129	380	304	549	240	139	215	212	144	216	200	120	249	259	142	78	95	319	267	275	247	283	188	414	383	220	400
MMERGLN_LTR	3	2	4	3	4	4	5	1	4	4	1	7	2	0	0	7	8	9	8	3	1	3	0	0	4	8	5	3	3	4	3	8	3	3	3	6	5	2	3	3	4	8	5	3	13	7	7	4	15
MMERVK10C-int	108	170	139	116	199	168	125	145	197	128	208	249	160	57	95	124	136	163	134	157	141	119	136	174	180	234	183	207	196	190	250	143	180	107	165	125	110	68	55	115	126	213	117	149	124	106	210	166	344
MMERVK10D3_I-int	12	14	26	22	32	15	19	22	16	13	26	39	38	16	41	38	30	65	21	38	30	43	24	46	24	53	26	35	36	12	51	11	19	25	37	11	53	30	13	26	47	38	32	30	41	17	25	57	48
MMERVK10D3_LTR	5	10	2	16	16	6	7	3	4	7	8	7	4	8	13	3	2	8	3	7	3	5	2	7	11	9	12	5	1	4	7	1	10	3	8	4	6	8	4	3	10	6	10	4	3	4	3	2	27
MMERVK9C_I-int	33	100	71	121	115	286	83	88	60	86	107	168	58	49	79	59	195	223	87	64	59	71	57	114	63	61	63	42	56	99	51	56	52	20	41	32	64	33	37	79	71	95	53	50	60	95	70	339	88
MMERVK9E_I-int	66	112	144	122	201	268	246	153	147	164	224	282	198	56	121	149	290	204	106	89	193	112	85	248	241	203	175	129	196	192	184	226	166	100	177	175	95	75	77	112	196	276	169	245	169	181	100	303	208
MMETn-int	15	42	50	4	74	37	25	23	21	64	75	31	44	7	22	30	51	35	50	49	25	41	19	39	16	37	33	30	46	32	37	24	24	16	14	12	24	20	10	34	35	42	29	38	19	47	51	78	99
MMSAT4	17314	22906	13423	17945	8349	5705	9462	11869	8557	10579	14616	17181	30035	17508	21380	22216	23275	22723	18787	14842	13496	13826	9767	17022	10338	11042	9631	5898	8823	16872	11270	10623	7426	5507	8974	6077	11659	5108	6061	9970	7619	15701	9718	8302	13401	15201	17107	14639	11811
MMTV-int	1	0	9	0	0	0	2	0	0	0	0	0	3	2	0	5	0	3	8	0	1	0	0	0	0	4	5	0	1	0	0	0	1	0	0	0	0	0	0	0	0	0	3	0	0	2	6	4	2
MMVL30-int	29	37	32	59	22	18	41	30	60	37	54	35	65	29	56	33	77	89	55	392	63	39	36	50	34	46	47	25	46	100	20	27	23	44	47	32	20	15	16	36	38	74	59	69	42	81	92	131	63
MRLTR33	208	366	212	256	169	147	164	230	163	148	230	280	406	213	229	226	269	204	256	233	264	228	132	309	179	202	178	148	131	209	144	178	177	127	189	109	147	61	108	245	88	300	164	195	265	214	204	215	47
MT-int	7	15	13	7	6	1	15	8	12	27	11	20	7	11	19	9	14	10	28	16	15	11	13	29	24	20	18	9	19	11	13	19	25	3	16	12	7	6	11	13	25	50	28	20	27	16	24	28	447
MT2A	10984	9056	4954	13273	14653	5293	11066	7481	6809	11828	12904	14625	13130	5660	10790	8107	14428	7668	7881	17360	6031	8094	11141	19092	13611	10580	9673	13188	24662	11805	16906	10758	12329	4841	8090	7328	8210	11892	2527	5484	8305	9485	9134	15838	8510	8875	8167	13592	3693
MT2B	346	465	329	397	328	235	312	382	313	415	393	421	504	264	374	315	439	360	357	418	428	370	281	681	403	561	478	269	445	344	316	420	332	204	424	269	345	209	207	403	360	659	494	452	494	529	540	523	695
MT2B1	700	981	634	547	843	770	941	1392	1177	1341	1144	1008	1005	394	676	772	818	790	952	1135	1727	941	854	2032	1208	2235	2067	780	1282	932	828	1483	1094	874	1846	1126	1055	492	1111	1825	1120	2656	1781	1828	1275	1955	2269	1465	1570
MT2B2	86	90	85	103	98	81	94	125	109	133	102	155	134	119	176	131	187	227	160	171	204	139	177	271	132	180	127	86	105	94	78	125	81	86	135	103	103	69	69	98	132	189	146	159	168	184	152	162	903
MT2C_Mm	21	37	17	23	31	23	25	27	14	27	26	21	44	13	22	42	72	57	36	47	19	30	19	56	20	34	31	17	38	9	29	27	19	25	49	17	37	16	12	33	36	58	29	26	17	36	71	72	707
MT2_Mm	281	258	258	271	290	151	235	238	200	293	340	463	419	196	314	298	339	303	269	413	326	341	279	568	281	282	294	236	318	244	263	227	255	116	203	150	362	251	186	254	276	507	318	406	317	424	371	374	3324
MTA_Mm	790	913	444	735	1164	919	1060	1104	1001	1423	1466	1800	1204	720	1275	879	1338	1220	1465	1618	1973	2065	1799	2886	1518	1748	1342	1017	1111	1161	1100	1167	1081	849	1294	942	1826	1098	1067	1508	1950	2969	2489	2234	1536	2533	2471	2583	4169
MTA_Mm-int	640	1117	485	581	737	663	759	715	749	874	982	1139	787	403	975	455	925	717	709	600	840	953	778	1548	1370	2074	1326	644	842	785	637	962	727	643	1027	679	963	339	666	811	1726	3076	1731	1172	1261	1512	1527	1182	19977
MTB	245	246	156	242	321	263	259	349	260	415	366	569	330	217	387	299	506	479	427	477	550	508	517	751	432	478	337	250	294	272	300	324	283	243	349	295	436	336	222	386	465	811	695	585	480	659	632	789	428
MTB-int	91	136	65	117	131	65	77	155	103	160	180	218	105	90	119	82	166	161	156	159	112	176	100	185	132	182	119	100	71	103	103	125	105	98	135	69	156	85	90	87	149	142	233	126	108	139	123	176	426
MTB_Mm	463	540	294	475	723	507	634	818	571	807	825	1076	696	352	655	449	695	624	601	1117	1127	970	852	1490	1050	1109	919	792	916	659	718	702	590	444	649	542	1108	780	639	837	1121	1714	1323	1417	1094	1160	1120	1629	731
MTB_Mm-int	184	174	167	142	239	137	167	216	162	316	361	346	221	135	170	211	181	157	150	197	143	238	160	306	240	282	195	205	252	179	229	222	222	122	223	188	207	159	120	189	285	556	317	335	200	205	261	209	466
MTC	1557	1612	1069	1336	2400	1698	2057	2406	1904	2964	2627	3018	2402	1224	1943	1697	2282	2180	2282	3638	3257	2522	2207	4366	3326	3667	2877	2693	3161	2489	2517	2495	2362	1526	2541	1964	2735	1937	1638	3132	3265	5785	4588	4212	3386	4046	4067	3821	2006
MTC-int	6738	6750	4005	5060	4666	3262	6879	8457	5547	7600	7926	15655	7431	4252	6043	4344	5785	4283	4038	5222	4655	5182	3708	7614	7013	5864	4848	5512	6859	3539	5588	3984	4155	3197	2834	3529	4203	2405	2273	3876	4781	6323	4458	4659	5019	5095	4597	3958	4198
MTD	3095	3807	2959	3140	3238	2219	3056	3707	3245	4017	3915	4686	4902	2591	3783	3408	4528	4433	4106	4426	4228	3594	2794	6301	3847	5409	4182	2773	4007	3248	2985	3454	2854	1984	3797	2697	3255	2077	1933	3621	3708	6896	4994	4380	4315	4997	5520	5594	5123
MTD-int	94	93	81	102	178	120	204	225	162	224	273	300	144	99	154	98	210	178	105	237	138	217	101	310	209	286	214	245	232	174	190	183	192	131	212	183	173	133	90	196	249	268	305	389	236	235	250	307	217
MTE-int	63	74	140	83	85	132	99	123	76	100	111	165	152	112	409	260	383	509	545	234	247	241	190	248	120	183	124	102	76	121	91	88	101	79	120	101	131	94	64	95	142	270	185	135	135	174	205	410	285
MTE2a	949	1242	1004	978	1130	736	889	988	860	1289	1401	1321	1771	905	1352	1164	1827	1511	1305	1684	1285	1135	1022	2116	1102	1504	1075	851	1124	1110	991	1100	1010	604	1225	799	1052	721	536	1077	1059	1802	1387	1436	1282	1423	1712	1792	1281
MTE2a-int	15	7	11	1	9	15	11	26	6	7	15	11	24	14	7	13	8	18	7	16	9	8	3	19	18	25	22	12	22	12	5	15	12	3	9	6	26	4	5	12	13	30	9	12	39	14	30	23	10
MTE2b	574	740	543	628	876	476	553	714	568	743	877	1227	1094	491	879	674	1225	1111	910	1164	1010	868	883	1328	769	829	744	494	595	747	584	651	588	370	636	455	649	486	300	610	615	1269	811	684	781	1005	995	1503	1102
MTE2b-int	53	64	72	33	50	46	50	50	71	70	69	99	117	71	76	62	155	90	188	49	109	78	77	118	93	81	106	34	30	74	38	81	55	48	102	50	60	14	22	88	81	129	106	89	72	109	133	75	90
MTEa	743	889	793	777	782	655	733	822	689	832	860	1011	1344	741	1056	927	1614	1435	1132	1277	1246	918	856	1565	959	952	963	723	1086	733	802	747	705	437	760	498	882	665	518	861	1036	1561	1187	1144	1095	1061	1152	1503	1509
MTEa-int	13	47	59	40	56	36	16	42	41	56	23	70	89	36	92	60	155	183	145	107	83	81	60	117	22	22	95	23	36	44	38	27	41	24	25	29	11	47	14	52	71	64	49	31	51	38	100	85	97
MTEb	265	330	319	290	287	210	261	302	293	346	389	438	430	259	484	380	644	680	523	465	469	405	391	594	351	503	392	229	332	245	237	243	261	178	351	215	277	184	156	304	373	610	423	426	405	467	517	654	931
MTEb-int	1	4	5	4	9	14	10	10	0	13	6	23	16	7	11	6	35	50	16	7	27	16	10	25	5	5	4	12	11	2	3	4	9	0	1	7	3	3	9	3	5	31	32	9	25	28	20	21	30
MURVY-LTR	14	25	18	15	20	27	20	25	23	33	24	43	6	14	33	31	40	31	15	31	27	18	13	55	22	26	15	19	32	17	6	35	13	14	47	11	8	15	13	28	35	35	51	21	30	16	25	28	93
MURVY-int	4	0	3	2	2	1	0	1	2	2	0	1	1	1	0	3	4	17	0	1	2	0	5	1	0	3	1	1	7	2	1	2	0	2	3	2	1	1	2	9	0	6	1	0	3	10	5	10	46
MYSERV-int	24	57	28	16	37	17	22	25	24	44	40	54	71	25	41	36	64	62	44	26	39	37	63	39	41	49	37	18	23	24	30	20	21	10	23	18	43	15	18	21	39	41	30	37	36	20	31	80	54
MYSERV16_I-int	423	459	668	471	388	249	350	399	339	492	577	712	1016	451	693	549	924	613	958	787	384	438	401	757	326	529	389	213	289	464	282	339	274	215	417	239	355	170	158	324	286	521	353	369	436	557	829	554	511
MYSERV6-int	176	256	183	235	191	171	166	209	147	225	306	310	403	216	255	301	309	308	622	370	365	262	228	342	286	323	242	180	240	278	219	276	200	115	270	103	156	134	131	254	294	630	489	270	262	313	338	332	389
MamGyp-int	54	188	124	93	79	32	81	166	97	79	137	183	89	11	72	31	69	70	53	51	113	72	106	83	100	46	92	53	104	53	111	111	63	51	63	105	61	26	16	56	36	103	54	72	101	101	62	112	21
MamGypLTR1a	0	1	0	1	0	1	1	0	1	0	0	2	0	0	0	3	2	4	0	2	3	2	3	0	0	0	5	0	1	0	0	0	2	0	1	5	0	0	1	0	0	1	0	1	0	1	6	2	0
MamGypLTR1b	0	0	3	6	1	3	0	0	0	1	2	0	0	6	13	5	7	2	4	6	1	3	4	11	5	3	0	7	2	5	1	0	4	4	0	5	3	2	2	8	12	14	6	0	2	8	9	10	1
MamGypLTR1c	10	9	8	10	19	12	9	16	11	14	16	5	7	11	18	11	22	18	9	20	26	9	11	24	19	17	8	8	6	11	12	2	10	9	27	6	7	8	8	13	11	17	15	11	12	9	15	15	0
MamGypLTR1d	0	0	0	2	0	0	0	0	0	0	1	2	0	1	1	0	2	1	0	0	2	2	0	0	0	0	0	0	0	0	0	0	0	0	0	0	0	0	0	1	0	0	0	1	1	1	0	4	0
MamGypLTR2b	0	0	0	1	0	0	0	2	1	0	2	0	2	0	0	0	5	3	3	2	2	0	0	0	0	5	0	5	1	1	0	0	0	1	0	6	1	3	0	0	0	0	0	0	0	0	4	3	0
MamGypLTR2c	3	0	0	0	1	0	0	1	0	0	0	0	0	0	0	0	2	1	0	0	0	0	0	3	2	0	4	1	4	0	0	2	0	1	1	0	4	0	1	2	0	6	0	0	0	0	2	1	0
MamGypLTR3	0	0	0	0	0	0	0	0	0	0	0	0	0	0	0	0	2	2	2	0	0	0	0	0	0	1	0	0	0	0	0	0	0	0	0	1	0	0	0	0	3	0	0	0	0	0	0	0	7
MamGypLTR3a	2	3	1	0	6	5	1	1	4	0	1	1	5	2	2	15	10	3	9	2	5	2	2	4	0	2	4	1	2	3	2	6	5	0	2	0	3	4	6	2	2	4	0	4	5	3	3	11	1
MamRep1151	39	38	52	26	15	15	19	20	16	27	40	29	58	26	43	25	37	44	50	27	33	22	30	31	19	51	22	15	15	21	21	19	12	11	28	3	21	9	14	24	13	68	26	12	21	42	29	20	39
MamRep1161	0	0	0	0	0	0	0	0	0	0	0	0	0	0	0	0	0	0	0	0	0	0	0	1	0	0	2	0	0	0	0	0	0	0	0	0	0	0	0	0	0	0	0	0	0	0	0	0	0
MamRep137	68	86	69	36	48	45	59	82	106	122	109	138	108	33	50	64	64	43	74	70	90	72	41	116	92	178	96	64	123	75	75	116	69	38	115	58	37	21	37	72	78	122	89	83	73	96	105	64	18
MamRep1527	1	2	13	3	0	1	1	5	14	4	4	4	2	0	1	2	3	7	13	8	12	1	5	20	6	30	8	3	1	4	0	2	9	6	13	9	3	0	9	17	10	37	4	10	2	14	5	22	23
MamRep1879	0	0	0	0	0	1	0	0	0	0	0	0	0	0	0	0	3	0	0	1	1	0	0	0	0	0	0	0	0	0	0	0	0	0	0	0	0	1	0	0	0	0	0	0	0	0	0	0	0
MamRep1894	2	7	2	10	3	2	10	10	2	3	1	15	3	0	7	9	5	5	10	3	1	3	2	10	7	13	8	5	5	8	9	3	4	2	11	1	7	9	2	6	4	20	15	14	11	10	5	6	118
MamRep38	0	2	6	0	1	2	2	4	1	2	1	1	5	6	2	2	3	9	0	0	7	2	2	2	2	6	2	0	0	6	3	1	1	2	8	2	6	0	3	3	2	9	20	0	7	5	9	4	7
MamRep4096	8	7	6	2	3	8	2	5	2	4	5	7	13	6	2	1	10	6	3	5	8	4	0	6	8	10	10	6	7	4	13	8	4	1	5	3	4	1	0	3	3	12	2	5	8	6	5	5	17
MamRep434	245	291	239	261	168	100	204	238	192	298	285	348	396	223	290	234	326	231	351	271	231	230	159	449	261	395	274	188	299	312	167	301	230	142	359	179	192	112	137	194	228	331	242	327	299	332	430	344	60
MamRep488	0	0	0	2	0	0	1	0	0	1	1	2	2	2	0	0	0	0	0	0	0	0	1	1	1	1	1	0	0	0	0	0	1	0	2	2	0	0	0	0	0	1	0	0	2	0	0	2	8
MamRep564	0	5	0	1	5	0	1	5	1	4	6	3	4	9	2	2	3	3	4	1	0	1	1	0	1	0	8	3	3	2	2	3	3	0	2	0	0	0	0	1	1	1	5	2	1	0	1	5	7
MamRep605	15	34	26	27	29	30	25	29	32	35	68	45	39	13	14	6	33	29	44	32	23	37	25	25	82	55	35	61	60	57	44	30	36	16	44	25	50	17	22	19	21	16	15	74	30	12	30	70	43
MamSINE1	50	75	93	59	54	47	70	73	58	49	66	52	117	62	82	90	103	106	72	102	71	89	66	111	61	104	62	34	41	32	26	41	47	26	48	24	53	20	33	65	62	82	99	57	97	136	104	68	56
MamTip1	0	1	1	1	0	1	1	0	0	1	1	2	0	0	0	0	2	2	0	2	3	0	0	0	0	1	0	0	0	1	2	0	1	0	1	0	1	0	0	1	2	1	1	0	1	0	2	1	0
MamTip2	871	978	850	941	924	580	744	1116	743	728	1215	1223	1476	696	943	879	993	874	1042	1276	1049	1218	869	1729	1208	1154	989	992	1083	1097	909	736	795	548	851	535	736	473	527	792	792	1262	886	1034	1054	1428	887	1034	193
MamTip3	278	238	152	298	338	118	232	167	122	254	211	229	302	181	284	190	341	260	203	497	231	216	289	731	296	292	182	252	383	236	285	171	169	98	169	143	202	250	96	180	227	273	219	356	270	321	318	364	62
Mam_R4	4	3	2	0	0	0	0	1	0	0	0	1	0	2	2	1	3	7	1	0	1	0	0	2	6	2	0	0	0	0	0	0	0	0	3	0	1	0	0	3	0	3	0	0	1	0	0	1	2
MuLV-int	9	0	0	0	4	2	0	1	0	1	0	4	0	2	0	8	13	15	5	6	0	0	2	1	2	7	2	1	1	0	0	3	0	2	0	0	0	3	1	1	3	8	0	0	4	0	0	7	1
MuRRS-int	8	17	2	2	2	5	2	8	2	1	4	14	4	19	5	22	28	33	4	10	10	14	8	6	6	5	5	4	0	7	8	2	3	0	3	2	14	14	4	2	6	8	3	8	8	5	12	41	11
MuRRS4-int	156	309	226	214	166	207	224	236	248	377	294	366	304	176	290	354	335	274	187	327	275	264	236	379	298	375	317	190	313	279	244	305	211	174	331	197	248	134	172	308	333	450	301	294	324	393	352	298	283
MurERV4-int	136	212	186	102	150	108	109	192	128	182	220	334	274	130	228	184	324	335	302	293	264	243	124	225	148	187	179	146	145	240	151	241	116	92	204	146	107	111	52	140	205	366	244	218	274	234	219	259	196
MurERV4_19-int	17	43	24	27	27	24	18	34	19	25	31	21	69	21	24	20	32	67	34	29	14	16	11	41	26	23	36	13	21	14	20	24	23	9	32	19	13	7	9	46	24	54	51	43	38	30	43	60	260
MurSAT1	0	0	0	0	0	0	0	1	0	0	0	0	0	1	0	0	0	1	0	0	0	0	0	0	0	0	0	0	0	0	0	0	0	0	0	0	0	0	0	0	0	0	0	0	0	0	0	2	0
MurSatRep1	4914	6626	4978	5339	4069	3115	3868	5559	4234	5155	5586	7456	8654	4534	6513	5808	6732	5282	6510	5902	6655	5189	4163	8399	4084	5043	4366	2377	3313	4608	3922	4235	3079	2642	4230	2849	4013	1827	2205	4516	2839	6279	4740	3712	4985	6277	6907	5419	4446
MusHAL1	182	135	177	164	181	87	124	96	96	198	202	289	252	114	240	141	310	285	161	204	104	124	141	282	129	100	86	107	159	191	102	167	149	63	183	103	91	51	49	65	86	167	96	145	123	140	126	213	106
ORR1A0	36	35	33	32	39	29	24	40	21	43	35	64	49	14	28	41	65	55	28	45	44	36	37	41	50	57	32	25	36	52	34	40	19	35	40	24	21	18	26	26	58	69	43	36	42	54	36	88	3637
ORR1A0-int	38	34	23	30	34	16	28	26	18	26	42	84	57	11	7	34	59	60	16	43	40	28	25	59	41	71	38	36	43	47	36	54	22	23	33	31	13	11	16	32	42	65	28	47	33	31	39	54	12951
ORR1A1	185	191	155	141	186	131	138	177	141	249	216	253	314	178	290	226	333	298	351	235	324	255	216	378	226	288	255	170	235	203	224	238	166	125	215	179	214	123	113	190	282	419	261	320	268	233	286	337	2900
ORR1A1-int	43	89	50	99	109	90	90	89	81	136	137	174	126	45	62	49	133	116	65	87	112	127	76	144	158	168	172	122	141	135	103	90	68	62	134	63	89	51	43	88	200	158	100	134	157	135	76	175	7586
ORR1A2	653	643	487	535	693	517	590	666	537	746	741	999	899	441	737	601	919	848	666	935	826	751	630	1225	969	1117	1041	684	970	724	732	725	578	424	640	509	676	415	390	740	930	1563	922	1109	1089	945	980	1111	3489
ORR1A2-int	334	432	127	354	431	332	502	522	454	454	523	622	460	187	200	190	356	361	287	409	510	436	261	688	782	1028	832	493	733	559	540	518	392	263	548	487	471	236	297	561	504	1072	679	780	593	578	678	653	5287
ORR1A3	382	427	207	255	212	185	322	353	298	365	371	386	453	259	291	249	312	375	216	353	326	246	289	595	505	565	574	305	318	262	230	345	259	177	333	255	323	158	197	374	392	704	421	398	427	506	546	471	947
ORR1A3-int	110	164	66	49	89	48	99	113	93	134	208	248	110	48	91	80	130	176	126	130	133	102	88	132	222	280	157	141	159	129	163	132	139	94	132	108	114	33	102	97	147	120	170	115	179	120	179	133	801
ORR1A4	483	631	517	547	490	356	486	665	484	488	560	777	868	418	582	491	694	619	651	600	674	558	394	842	661	696	736	351	564	382	457	501	427	315	482	410	418	291	285	635	620	1124	715	734	688	679	735	821	552
ORR1A4-int	71	112	81	128	100	72	110	121	105	120	119	260	214	126	122	118	181	263	185	143	151	182	135	272	173	141	179	134	109	129	127	118	108	60	98	81	142	93	75	104	158	161	129	252	189	218	160	208	543
ORR1B1	794	786	717	822	816	628	736	747	711	931	1073	1312	1204	701	939	778	1288	1340	1061	1290	931	914	880	1823	927	1240	974	735	1007	919	834	788	713	492	970	629	815	727	488	849	953	1258	1054	1220	826	1098	1164	1592	1317
ORR1B1-int	27	86	103	72	42	124	49	111	48	81	79	80	123	56	108	97	136	136	120	113	93	91	76	121	62	116	95	60	67	83	67	68	46	41	66	60	81	55	37	51	84	155	99	103	94	77	115	150	203
ORR1B2	386	346	273	454	247	259	237	320	228	298	321	432	538	310	386	324	635	626	513	333	371	333	286	569	346	413	328	165	333	332	246	321	197	150	308	185	227	172	146	248	292	487	307	268	337	332	392	474	504
ORR1B2-int	48	25	33	18	23	24	17	28	19	12	25	48	27	15	63	21	73	65	91	23	61	23	37	38	51	30	32	19	19	13	16	35	19	15	13	24	27	17	14	19	29	105	36	19	23	44	51	100	279
ORR1C1	683	592	352	606	869	536	624	646	557	756	992	1120	877	388	591	551	914	757	576	1041	694	636	734	1292	1078	991	958	944	1108	824	778	705	777	398	695	554	812	610	376	666	1012	1366	997	1331	859	974	829	1102	644
ORR1C1-int	661	494	536	588	438	239	283	478	272	373	418	760	1179	544	974	720	908	877	486	783	495	524	446	738	298	339	275	213	333	335	364	288	270	162	194	198	326	267	125	280	303	496	442	302	457	567	550	485	87
ORR1C2	737	702	590	716	735	476	544	699	504	561	719	880	1036	551	614	564	993	1013	656	842	533	668	579	1180	746	846	705	547	782	659	540	549	517	364	555	302	526	432	319	435	596	880	534	746	811	674	737	824	605
ORR1C2-int	55	77	58	75	91	68	53	85	46	107	85	146	115	80	94	97	96	106	33	94	76	26	61	208	61	88	84	39	95	67	85	78	99	52	58	49	50	36	17	49	39	99	86	95	58	118	92	131	51
ORR1D-int	3	0	0	4	4	2	4	3	0	5	3	5	2	2	3	4	15	11	1	12	3	5	2	2	2	10	6	4	3	1	10	4	6	5	2	3	0	3	3	1	1	5	9	2	8	3	14	6	14
ORR1D1	1415	1412	1388	1276	1257	997	1095	1384	979	1188	1439	1928	1996	1230	1652	1730	2060	2059	1617	1730	1541	1517	1253	2087	1167	1200	921	930	1176	1007	1070	884	779	529	1037	658	920	757	512	1066	1097	2016	1253	1161	1416	1343	1321	1917	1618
ORR1D1-int	42	59	65	59	52	60	40	65	52	70	91	59	77	43	81	44	112	133	71	90	106	74	54	141	66	84	91	73	76	55	44	63	85	42	140	57	61	41	34	49	106	230	124	77	121	114	137	153	217
ORR1D2	1160	974	1058	1148	1084	701	896	1042	794	1294	1215	1670	1854	1034	1355	1400	1777	1543	1658	1649	1372	1249	977	1944	957	1209	1037	884	1130	1094	876	1018	875	535	1090	801	1180	728	575	988	1216	1950	1164	1252	1145	1391	1486	1795	1165
ORR1D2-int	82	82	47	93	108	73	97	77	54	109	69	108	101	49	72	65	86	113	130	84	92	63	69	115	80	154	87	62	87	70	80	59	71	52	90	67	67	52	48	78	59	135	67	87	94	78	111	157	308
ORR1E	780	816	882	795	803	666	722	818	641	901	987	1098	1409	812	1217	1008	1511	1602	1251	1447	1264	1029	939	1620	930	1171	943	670	825	712	632	814	666	409	848	628	803	625	427	924	925	1605	1153	1093	1092	1163	1456	1720	1419
ORR1E-int	39	46	20	32	36	44	29	44	62	80	54	49	99	50	42	55	84	108	53	83	68	36	90	101	30	69	48	33	63	61	20	68	54	31	74	47	48	43	31	97	72	118	66	78	73	61	134	139	89
ORR1F	1799	2299	1708	1778	2082	1185	1723	1906	1585	2412	2396	3014	3656	1988	2169	1942	2979	2642	2196	2680	2275	2021	2084	3673	2122	2671	1815	1573	2005	1754	1769	1817	1581	1139	1836	1415	2026	1626	1098	1625	2516	3958	2354	2500	2639	2423	2807	3363	3071
ORR1F-int	0	3	2	5	0	1	4	3	4	6	6	5	0	2	3	0	9	21	4	4	10	10	8	9	1	1	1	4	1	2	0	0	6	1	4	1	1	0	0	0	11	6	2	1	14	10	35	9	13
ORR1G	1387	1470	1030	1416	1250	698	1082	1321	876	1173	1578	2081	2192	1030	1578	1402	2093	1471	1401	1625	1247	1239	1196	2285	1384	1247	1028	1039	1396	1190	1139	1034	959	587	1140	785	1128	844	564	1111	1331	1780	1212	1261	1484	1464	1404	1351	552
ORR1G-int	10	13	0	4	0	5	6	5	5	14	7	1	28	2	5	4	2	2	12	11	15	15	12	21	8	15	24	5	4	8	1	3	9	12	11	1	10	8	2	4	22	46	0	12	17	21	28	5	32
ORSL	23	61	46	22	36	16	24	28	23	25	35	43	73	39	39	44	51	49	56	36	24	34	13	37	20	13	30	9	24	21	21	28	20	13	27	16	21	10	11	20	23	21	22	22	32	25	23	23	0
ORSL-2a	0	0	1	2	0	0	5	0	0	0	1	1	1	0	4	6	6	2	0	0	0	0	0	0	0	3	1	0	0	0	0	0	0	3	0	0	0	0	0	1	1	4	0	0	0	0	0	1	14
ORSL-2b	7	37	20	35	15	5	23	9	25	22	40	19	29	32	28	27	45	48	14	40	21	10	17	18	10	7	18	5	9	8	15	27	24	11	21	13	18	10	4	16	15	15	33	22	14	12	30	31	22
PB1	2391	3094	2564	2671	2149	1310	1915	2437	1841	2410	2919	3809	4801	2605	3377	2788	3765	3263	3480	3152	2608	2488	1818	4195	2111	2542	2004	1618	2201	2219	1726	1765	1607	1105	2020	1258	1882	1288	1087	2036	1970	3384	2370	2203	2512	2644	2661	2923	1462
PB1D10	15115	17147	13139	15864	13901	8032	11603	12771	9742	15386	18192	22014	24071	12852	18944	15431	21284	17438	18437	19433	14460	13393	10805	24509	14124	16042	12586	11665	15260	13755	12910	12739	11980	6887	12398	9593	12515	9731	6637	11860	11459	18680	14154	15427	13332	16605	16265	17669	8142
PB1D11	4519	5508	3732	4489	4347	2359	3935	4626	3372	4738	5009	6350	6539	3426	4178	3653	4952	4301	3410	4791	3726	3693	3260	6389	5503	6172	5004	4375	5681	3985	4817	4160	3985	2329	4064	3074	3631	2689	1789	3542	4156	6091	4017	4592	4796	4712	4901	4935	2448
PB1D7	4977	6227	4693	5376	5083	2708	4201	4682	3606	5329	6428	8051	8642	4269	6251	5296	6575	5724	5878	6968	4728	4655	4241	8527	4913	5297	4428	3907	5327	4738	4229	3999	3915	2402	4087	3106	3917	3157	2150	3749	4302	6385	4855	5270	4843	5346	5290	6044	3415
PB1D9	4412	5004	3941	4938	4268	2300	3600	4005	2975	4470	5224	6700	7594	4174	5970	4590	6800	6096	5569	5999	3977	4377	4047	7415	4125	4408	3401	3252	4212	3709	3527	3305	3134	1975	3333	2358	3361	2626	1758	3158	3554	5675	4041	4328	4298	4539	4574	5238	3542
Plat_L3	193	177	147	153	145	82	130	109	113	170	207	336	250	122	228	199	308	211	249	252	197	224	186	325	152	186	139	147	176	152	149	124	131	72	130	87	172	107	76	152	145	246	152	181	142	195	168	262	77
RCHARR1	1306	1502	931	1062	660	357	779	767	585	982	1217	1332	2055	1055	1307	1397	1858	1538	1663	1414	1025	1219	1139	1857	947	1079	884	653	991	1025	692	765	605	543	775	597	776	519	410	709	998	1549	1039	1027	1122	1168	1151	1265	1214
RLTR1	0	0	0	0	1	0	0	0	3	0	0	0	2	0	7	0	1	2	0	4	4	0	0	0	0	0	0	0	0	1	0	0	0	0	0	0	0	0	0	0	0	0	0	0	2	0	0	0	2
RLTR10	13	29	11	18	40	27	23	25	22	21	27	54	16	8	18	22	34	33	28	41	35	42	33	58	33	43	43	31	40	31	25	33	25	24	32	22	41	24	28	20	39	67	40	43	33	43	59	58	26
RLTR10-int	53	64	135	23	88	73	86	109	85	75	114	84	33	18	49	47	50	48	32	68	45	80	54	90	85	182	114	63	146	68	56	91	79	63	133	132	66	34	33	83	73	127	38	74	65	111	97	110	55
RLTR10A	78	69	43	51	47	38	45	66	70	78	57	60	110	37	46	14	56	49	59	55	63	46	52	91	99	126	111	48	176	40	37	48	23	38	38	36	77	19	38	59	61	170	66	112	104	104	99	86	194
RLTR10B	5	0	1	0	0	2	5	2	0	1	1	3	4	1	3	0	6	9	3	1	4	3	2	3	2	6	2	0	0	2	0	8	1	1	3	6	2	4	2	1	4	2	3	7	3	4	2	7	5
RLTR10B2	35	29	13	14	55	18	45	51	26	45	29	72	12	5	14	9	21	22	19	21	23	11	29	44	66	37	38	62	43	22	42	39	45	37	15	35	31	24	13	28	18	42	11	39	18	22	14	54	23
RLTR10C	21	14	16	24	19	21	17	32	16	27	28	39	14	18	17	16	41	56	32	22	26	24	19	36	25	46	24	27	33	15	19	23	25	11	20	21	26	11	12	31	21	32	44	31	24	45	36	45	106
RLTR10D	38	80	63	53	122	38	46	34	36	75	60	84	55	47	81	59	161	95	55	158	97	93	91	171	84	71	53	33	78	68	54	70	67	28	34	15	78	83	50	97	197	66	62	114	118	86	108	161	35
RLTR10D2	11	15	6	5	33	8	24	24	12	16	25	58	14	7	16	6	15	9	11	16	17	6	18	9	27	12	21	20	19	10	11	24	17	17	20	11	15	18	6	12	19	18	29	22	15	9	24	33	27
RLTR10E	68	92	93	86	84	36	61	51	43	77	95	110	205	84	126	127	107	112	158	112	81	90	62	125	58	70	65	47	65	60	59	54	56	29	70	43	68	39	30	63	70	84	82	89	89	72	108	72	96
RLTR10F	40	41	21	37	64	12	46	11	25	37	56	32	72	20	32	41	40	59	25	57	26	23	23	74	63	52	25	35	69	50	40	28	29	10	48	26	39	35	21	31	22	45	79	76	54	32	49	41	225
RLTR11A	249	307	251	270	257	152	260	318	223	285	299	399	303	238	316	230	382	367	280	298	347	353	200	508	328	334	316	215	348	307	347	276	217	210	240	212	287	175	149	280	294	425	358	463	439	469	515	405	209
RLTR11A2	72	77	102	78	101	125	68	82	65	79	84	105	96	94	94	100	174	219	96	100	138	103	71	116	98	157	105	61	91	79	81	69	84	50	90	47	47	45	45	106	87	145	129	159	153	119	123	201	102
RLTR11B	248	271	146	163	180	143	183	209	144	203	191	250	233	120	159	114	205	232	215	182	156	237	155	362	344	314	272	184	201	228	221	182	148	119	226	167	173	135	95	151	190	263	289	228	271	295	300	298	130
RLTR11C_MM	12	31	12	22	17	55	5	14	8	11	15	17	39	33	25	32	60	60	20	32	37	24	28	21	19	20	23	19	9	19	27	22	30	12	5	5	9	15	12	20	21	23	12	34	18	36	21	49	81
RLTR11D	0	0	1	0	4	13	0	0	0	3	2	1	1	3	1	10	22	25	2	4	3	2	5	6	5	1	2	2	2	3	2	3	0	3	2	0	1	1	0	0	2	5	5	2	3	2	2	19	2
RLTR12A	0	2	11	1	9	16	5	6	1	7	2	11	8	3	2	5	20	21	14	5	19	5	6	19	5	5	4	3	23	9	5	8	4	4	1	6	6	4	2	4	10	18	1	11	4	14	20	36	8
RLTR12B	327	332	278	317	317	196	205	329	227	309	242	422	735	479	598	571	691	489	642	896	431	573	510	929	354	228	264	239	264	343	300	175	255	195	231	199	560	249	201	372	488	739	371	457	359	507	408	495	261
RLTR12B2	0	0	0	0	0	2	0	0	0	0	0	0	0	0	0	11	1	5	0	0	0	0	0	0	0	0	0	0	0	0	0	0	2	1	0	0	0	0	0	1	0	0	1	0	0	0	4	6	9
RLTR12BD_Mm	78	122	78	127	102	69	68	121	100	101	121	148	226	116	124	100	173	148	140	182	149	95	61	206	117	132	96	74	95	68	73	79	101	59	84	43	69	65	37	74	109	174	141	130	132	179	147	181	156
RLTR12C	38	45	13	23	24	26	30	42	21	25	26	24	41	36	38	14	61	49	17	66	35	39	35	67	26	25	14	9	39	22	39	15	17	16	10	15	28	14	20	27	24	69	50	40	33	37	31	48	38
RLTR12D	111	133	87	105	84	64	90	77	73	90	147	115	202	106	95	71	170	120	114	184	90	133	139	205	69	102	93	56	72	100	61	51	38	56	73	61	114	101	64	90	123	167	74	116	107	140	131	209	131
RLTR12E	16	7	13	19	13	25	16	17	19	23	18	16	18	6	16	15	42	72	35	26	15	27	42	27	19	35	8	14	24	13	8	11	9	1	9	10	11	7	17	11	24	58	19	20	25	38	32	61	85
RLTR12F	0	0	0	0	1	0	0	0	0	0	0	0	0	1	0	0	0	2	0	0	0	0	0	0	0	4	0	0	0	1	0	0	0	0	0	0	0	0	0	9	1	0	1	0	0	3	2	1	0
RLTR12G	75	165	99	99	126	90	58	92	93	97	142	230	244	91	146	123	214	213	149	149	201	104	125	129	82	91	79	75	116	85	55	96	99	48	114	82	72	45	57	86	140	174	96	117	145	138	192	150	75
RLTR12H	0	1	3	0	0	6	5	0	0	7	0	2	6	0	5	6	16	16	4	0	1	0	3	3	2	2	2	4	0	0	1	2	0	0	0	0	1	1	0	8	1	2	8	4	6	6	1	23	13
RLTR13A	0	0	2	0	2	2	1	1	1	0	0	1	4	1	0	1	4	3	4	1	1	0	7	1	1	1	1	2	0	0	1	0	0	0	2	1	0	2	1	1	1	4	4	0	5	2	4	5	15
RLTR13A1	0	1	4	0	2	22	0	2	0	1	2	1	0	1	0	0	8	9	3	7	0	1	0	2	0	2	0	0	0	3	1	1	1	1	0	2	0	2	2	1	4	2	0	2	0	0	2	17	0
RLTR13A2	8	8	12	8	12	6	9	15	8	13	16	15	29	14	29	10	15	27	13	22	19	11	10	22	0	2	4	9	5	16	2	4	8	1	9	2	6	7	5	4	8	7	7	6	18	15	14	17	3
RLTR13A3	1	2	2	4	5	4	4	1	4	8	2	3	7	3	2	11	6	8	8	9	2	1	5	7	9	6	1	5	8	12	3	3	3	3	5	5	15	4	4	5	0	1	6	4	2	1	8	8	8
RLTR13B1	84	92	45	71	52	162	50	79	65	67	64	92	108	53	43	38	85	107	23	22	46	18	38	52	100	127	130	67	76	98	51	67	46	24	52	14	40	16	25	46	84	103	41	49	74	68	119	251	44
RLTR13B2	2	0	0	2	1	72	1	3	1	3	0	5	1	0	1	3	24	20	2	0	3	5	0	5	0	0	0	3	2	1	3	0	2	0	1	0	2	0	0	3	1	14	7	0	4	5	1	62	6
RLTR13B3	3	10	9	5	8	57	10	3	0	1	2	18	7	6	8	1	18	17	6	3	9	11	2	15	7	8	6	9	2	8	8	9	7	2	7	6	5	4	0	7	9	26	6	12	3	5	7	60	22
RLTR13B4	9	16	13	6	9	10	5	9	4	11	4	14	17	11	22	18	35	21	8	4	7	8	6	13	5	6	1	4	5	0	6	2	4	5	4	2	1	5	3	7	6	17	6	4	7	8	12	35	8
RLTR13C1	9	20	12	11	11	28	25	14	13	3	18	32	7	14	51	7	31	52	27	29	14	17	17	37	23	2	8	7	19	19	5	16	5	5	6	6	17	21	0	12	26	16	12	9	15	2	22	91	2
RLTR13C2	134	232	145	254	143	161	172	171	106	130	180	243	229	93	188	119	237	219	113	112	68	83	115	232	152	124	127	158	129	224	140	125	105	53	79	53	70	74	50	55	115	133	74	57	94	85	95	291	64
RLTR13C3	0	0	2	0	1	48	1	0	3	2	2	1	0	0	0	3	30	35	0	0	6	3	9	4	7	3	1	0	0	3	0	0	0	2	3	0	1	1	0	2	6	1	4	0	0	3	0	82	8
RLTR13D	0	0	0	0	0	0	0	0	0	0	0	1	0	0	0	0	0	1	5	0	0	0	1	0	0	1	0	0	0	0	0	0	0	0	0	0	0	0	0	0	0	0	0	0	0	0	2	4	5
RLTR13D1	3	2	6	4	5	14	8	1	5	9	12	7	2	5	6	1	12	8	6	6	21	6	6	17	5	9	6	4	4	4	1	11	3	7	5	3	8	3	8	13	12	13	9	20	16	18	14	22	110
RLTR13D2	1	4	13	1	3	5	2	1	3	1	9	2	4	4	19	4	35	16	14	8	8	18	2	5	5	1	4	2	0	6	0	5	1	4	5	3	8	8	0	10	14	14	5	2	5	12	9	26	20
RLTR13D3	1	7	3	1	5	12	0	2	1	4	1	15	7	1	8	6	15	18	0	1	3	1	2	1	1	2	6	1	0	2	1	3	1	13	1	1	0	1	1	0	5	1	4	1	3	11	1	33	14
RLTR13D3A	0	3	1	1	0	5	9	0	9	1	8	14	0	6	7	1	11	5	3	7	12	0	0	5	9	1	7	4	1	6	1	1	4	9	11	0	0	0	2	5	3	8	3	4	13	1	2	11	3
RLTR13D3A1	76	76	32	101	102	31	46	78	60	69	88	108	217	78	122	61	106	94	120	104	65	78	86	126	58	75	87	58	69	103	49	75	67	28	70	51	100	28	44	75	44	102	55	90	102	159	133	163	100
RLTR13D4	29	3	1	4	1	22	1	1	0	1	6	0	3	0	0	0	26	34	0	0	0	1	0	5	1	2	2	2	1	3	3	0	0	3	0	4	0	4	1	0	11	0	3	1	0	0	1	44	0
RLTR13D5	10	15	8	19	15	50	5	10	20	9	11	15	39	15	17	26	40	64	54	26	21	17	14	28	9	10	32	13	10	9	0	13	3	1	16	10	0	1	4	42	29	17	16	18	33	27	55	92	219
RLTR13D6	31	19	35	37	48	316	45	58	43	59	69	80	53	32	40	44	171	209	47	56	60	48	56	86	51	107	77	45	51	50	59	73	48	32	104	36	41	27	31	64	75	66	91	78	101	71	102	440	187
RLTR13E	92	50	101	114	69	148	57	73	65	62	70	110	108	116	93	131	171	110	142	82	61	58	52	110	67	103	62	42	52	57	39	70	51	13	61	58	63	38	10	49	74	84	62	54	128	76	69	143	125
RLTR13F	1	1	0	0	6	21	0	2	0	0	0	1	0	0	0	2	11	21	2	0	0	3	0	3	0	0	3	0	0	6	0	0	0	0	0	0	0	0	0	0	0	2	1	0	3	4	0	24	26
RLTR13G	1	8	7	11	12	113	0	2	0	5	6	21	1	3	5	10	55	46	10	13	4	15	2	11	12	2	1	6	8	14	3	2	2	2	2	0	11	1	2	2	3	13	4	1	10	7	2	91	24
RLTR14	893	708	391	721	681	318	678	696	494	710	795	965	1049	537	731	639	797	650	490	844	650	614	666	1157	1066	861	684	810	1127	758	816	515	593	325	429	418	781	661	316	569	807	912	878	924	734	881	758	963	728
RLTR14-int	45	40	46	47	26	40	27	49	26	43	41	56	64	44	106	61	85	107	71	90	75	35	22	95	37	56	43	18	28	52	47	26	39	23	39	29	32	17	34	57	46	51	68	55	74	76	105	96	133
RLTR14_RN	797	881	537	992	662	234	558	522	379	712	957	953	1391	692	1011	772	1237	676	645	889	500	455	422	1239	729	688	539	501	636	578	560	707	662	260	472	424	547	432	220	417	412	662	551	676	413	646	567	740	128
RLTR15	137	76	108	80	102	97	68	74	73	136	105	167	206	94	154	118	221	166	152	153	74	114	113	221	76	87	62	73	60	104	68	109	96	65	99	77	124	66	35	64	78	107	121	72	105	142	129	237	100
RLTR16	146	142	208	154	158	66	103	125	116	150	186	291	256	212	196	184	181	226	153	186	156	121	76	219	132	195	157	115	131	131	171	142	124	77	136	132	160	89	49	102	140	228	174	188	147	202	230	281	119
RLTR16B_MM	22	49	30	38	21	29	34	32	23	33	29	59	44	30	73	26	70	67	34	49	32	56	40	68	31	75	34	28	64	27	13	34	41	14	40	21	33	33	14	19	30	44	16	39	49	47	30	53	0
RLTR16C_MM	12	17	4	5	9	5	7	17	17	13	13	14	16	8	0	3	15	21	5	7	15	5	5	23	19	17	6	9	10	12	17	15	21	5	21	6	9	7	5	8	3	13	22	9	7	23	9	17	25
RLTR17	32	58	32	18	11	69	27	25	8	26	41	52	62	20	49	11	162	150	53	53	41	32	30	50	33	23	26	10	32	21	14	20	16	13	35	7	21	22	15	31	25	57	33	27	16	26	48	112	70
RLTR17B_Mm	1007	938	758	477	333	252	299	406	368	469	505	688	911	502	652	537	808	715	758	527	460	461	343	716	345	574	387	253	343	454	316	458	288	293	517	303	274	205	193	369	347	611	462	475	484	539	709	617	614
RLTR17C_Mm	2	0	9	0	1	10	0	1	1	2	6	3	1	2	0	12	13	17	13	12	12	3	11	6	0	14	3	3	4	3	10	2	1	0	0	1	2	5	5	1	8	1	1	6	3	7	14	11	0
RLTR17D_Mm	385	571	377	357	280	284	244	387	308	393	488	881	761	408	597	367	615	424	723	345	562	560	418	726	509	272	312	279	324	572	213	350	316	222	213	197	502	372	233	359	191	546	232	367	303	588	517	522	330
RLTR18	79	98	70	92	96	53	63	60	56	77	82	186	82	91	117	130	149	127	161	116	100	148	79	203	87	111	84	87	127	88	90	111	85	33	75	80	84	87	58	100	104	98	66	119	87	88	115	182	138
RLTR18-int	14	32	5	16	12	15	32	51	20	31	13	27	35	20	7	8	21	15	26	14	27	17	14	12	59	109	67	37	39	26	27	28	10	14	14	37	19	6	12	26	37	96	30	31	52	36	31	31	64
RLTR18B	87	133	136	114	120	61	105	127	102	128	150	183	175	90	71	67	193	117	60	122	96	79	78	149	127	142	147	77	121	127	88	133	130	61	136	60	79	49	35	94	69	180	90	113	92	133	175	113	56
RLTR19	36	48	25	23	32	36	24	31	29	46	40	57	68	25	27	25	68	73	40	33	44	53	17	83	38	42	43	16	32	21	12	30	19	10	14	19	15	17	12	7	16	34	25	28	34	45	39	34	216
RLTR19-int	191	247	199	211	235	153	202	208	192	196	246	319	378	168	211	170	356	225	296	268	166	210	180	325	322	371	243	173	256	255	134	240	171	182	170	124	172	112	110	196	198	346	214	274	252	273	257	318	387
RLTR19A	34	21	11	7	7	4	16	3	5	11	25	13	64	28	39	17	15	30	7	10	8	21	12	32	36	38	22	10	22	15	16	11	11	13	17	11	17	19	6	19	16	39	17	19	9	24	37	34	64
RLTR19A2	0	1	0	0	2	4	1	1	1	0	2	0	1	4	0	1	3	1	0	1	1	0	0	0	0	0	4	0	0	0	0	1	0	0	0	0	0	0	0	1	1	0	0	2	0	0	0	4	10
RLTR19B	2	1	3	2	1	4	3	1	0	6	3	3	5	0	4	3	12	4	1	6	4	4	0	5	0	0	1	0	1	1	1	4	0	4	3	1	2	4	0	1	4	6	3	0	3	6	9	12	18
RLTR19C	10	8	14	8	10	12	15	18	13	9	8	17	10	4	10	8	6	17	15	9	27	7	14	16	28	21	31	18	4	26	13	3	15	5	6	9	10	9	6	10	51	53	36	4	39	20	35	30	96
RLTR19D	1	0	0	0	0	0	0	0	3	0	2	0	0	0	0	1	0	3	2	0	2	0	0	0	4	0	0	0	0	0	0	0	1	0	5	0	0	5	0	0	8	13	3	0	0	9	1	0	0
RLTR1A2_MM	110	188	195	154	180	86	146	167	155	161	118	138	182	85	217	127	159	197	233	175	202	175	127	324	212	277	246	141	222	146	125	192	192	97	272	124	101	91	74	189	106	307	181	224	160	239	325	195	82
RLTR1B	17	30	20	36	29	26	26	32	22	16	27	49	36	23	33	36	38	27	39	50	27	32	44	50	27	35	19	30	9	32	25	32	29	10	36	16	22	12	12	25	39	67	65	27	42	21	36	55	122
RLTR1B-int	332	315	285	410	324	274	273	413	325	427	384	508	602	284	356	322	448	369	734	519	634	469	382	686	317	434	307	374	257	431	324	374	260	199	463	221	415	280	249	488	403	711	373	424	510	530	707	725	677
RLTR1C	9	1	2	0	4	5	4	5	0	12	4	2	4	11	4	3	10	3	11	5	7	2	0	8	15	9	6	6	2	11	6	1	2	2	4	1	1	9	2	1	3	13	8	8	5	3	15	13	40
RLTR1D	21	96	50	40	49	26	36	38	21	37	86	32	107	29	78	58	94	84	48	49	79	37	91	121	45	87	28	49	27	37	35	64	33	14	63	24	74	40	46	43	72	74	34	85	71	33	111	64	57
RLTR1D2_MM	5	1	0	3	7	6	1	0	7	0	8	0	6	10	30	11	24	17	17	43	14	7	7	15	10	1	14	3	2	3	4	5	4	3	2	1	24	8	2	9	20	5	4	11	5	8	6	20	4
RLTR1E_MM	1	5	12	7	5	3	3	4	0	3	3	4	5	4	4	5	12	4	5	5	2	3	6	7	4	3	5	2	3	1	5	0	1	2	3	1	6	2	0	2	2	4	1	6	3	5	3	10	0
RLTR1F_Mm	0	0	0	0	0	1	0	0	0	0	0	0	0	0	0	0	1	1	0	2	0	0	0	0	6	0	0	0	0	0	0	0	0	0	0	0	0	0	0	0	0	0	0	1	0	0	0	1	20
RLTR20A	0	0	0	3	0	7	0	2	0	0	0	1	2	0	0	0	20	5	0	3	2	4	10	8	0	1	5	1	5	0	0	0	0	0	3	0	3	1	0	0	10	3	4	1	1	0	2	3	2
RLTR20A1	12	1	19	8	5	10	2	6	6	15	9	35	59	22	9	23	38	17	22	19	26	5	11	29	12	2	3	13	1	23	9	7	10	5	15	5	5	21	12	12	10	16	6	19	17	21	15	28	0
RLTR20A2	0	0	1	0	3	2	0	0	0	0	0	0	0	0	0	0	9	16	0	0	0	0	0	2	0	0	0	0	0	0	0	0	0	0	2	0	0	0	0	0	1	1	0	2	0	0	0	7	0
RLTR20A2B_MM	10	2	0	6	0	4	1	3	0	0	1	1	4	3	3	4	10	15	2	5	13	0	1	3	0	0	0	0	1	2	3	2	1	1	2	0	0	1	0	0	5	0	3	3	10	4	3	21	30
RLTR20A3_MM	4	39	17	48	20	11	18	28	21	16	18	29	48	14	21	31	52	56	6	19	27	12	25	29	38	34	18	14	14	21	21	24	28	21	27	27	22	8	14	32	8	30	24	27	23	35	28	42	30
RLTR20A4	1677	1965	1764	1832	1575	966	1187	1499	1204	1738	1912	2637	3157	1804	2416	2185	2603	2264	2432	2100	1950	1960	1819	2796	1389	1564	1288	1236	1477	1601	1537	1367	1167	707	1418	1047	1628	960	842	1276	1471	2311	1466	1492	1625	1871	1809	2191	929
RLTR20B1	29	6	25	11	23	19	19	19	5	12	13	30	53	10	33	27	71	33	25	28	17	50	22	49	20	19	12	13	17	7	5	16	7	7	19	5	10	4	10	14	24	49	24	17	25	16	13	53	56
RLTR20B2	1	3	3	0	3	12	3	1	6	2	2	5	1	1	3	0	18	20	4	7	3	0	0	0	2	0	7	2	0	0	0	7	2	2	0	0	6	0	0	3	3	9	0	0	6	9	4	12	0
RLTR20B3	2	10	14	4	8	13	9	19	6	13	14	5	5	3	2	12	25	31	12	19	20	2	3	24	17	28	19	16	12	11	18	13	5	17	12	12	14	8	6	18	15	23	18	20	31	12	40	38	13
RLTR20B3A_MM	0	11	2	5	4	10	1	0	2	8	2	5	9	7	7	7	34	14	2	2	3	0	1	5	1	2	0	2	3	2	2	1	1	0	0	8	2	3	0	5	9	3	0	1	11	0	0	18	14
RLTR20B4_MM	0	0	0	1	0	8	4	0	0	0	0	1	11	0	0	0	7	11	0	0	0	3	3	1	0	7	5	3	9	0	0	0	1	0	0	0	0	0	0	3	0	0	0	0	0	0	0	4	1
RLTR20B5_MM	10	22	21	24	39	39	34	29	15	30	44	60	50	19	82	50	68	83	65	94	144	71	90	103	37	34	47	21	31	25	45	53	18	31	41	44	74	17	37	66	95	123	110	119	101	85	200	148	23
RLTR20C	0	0	1	0	2	4	0	3	2	1	2	2	1	0	2	0	15	10	0	0	7	3	0	0	1	1	1	0	3	2	0	2	0	1	1	3	0	1	0	0	2	0	3	5	5	5	1	8	2
RLTR20C1_MM	1665	1787	1558	1765	1680	942	1538	1665	1232	1891	2363	3121	2797	1678	2336	1881	2638	2005	2398	2380	1650	1939	1690	3207	1920	1818	1424	1623	2096	1643	1634	1441	1315	879	1312	1104	1683	1190	798	1395	1544	2185	1780	1911	1848	1951	1780	1869	949
RLTR20C2_MM	55	102	86	94	59	56	69	67	41	73	82	120	108	86	104	82	134	142	119	86	55	82	31	102	67	105	88	44	96	79	88	80	62	41	44	61	69	58	33	61	34	138	44	90	67	84	86	63	83
RLTR20D	191	194	98	195	111	75	91	110	127	162	277	315	311	144	163	169	301	156	246	255	119	103	122	154	134	186	116	146	218	194	179	181	144	63	160	128	131	94	84	110	178	171	138	166	158	104	161	129	95
RLTR21	577	580	518	679	380	195	315	485	369	536	632	628	967	681	1149	988	825	971	1212	844	570	689	646	777	420	473	305	289	285	412	267	312	285	196	354	198	537	274	247	364	275	710	481	461	664	660	704	719	323
RLTR22_Mur	27	49	42	32	31	22	13	25	22	26	38	55	58	38	55	43	77	85	77	56	28	58	35	70	28	43	32	28	26	79	23	25	19	42	60	23	36	18	23	34	35	50	49	27	44	83	43	120	83
RLTR22_Mus	12	36	28	32	27	34	22	25	11	26	25	51	22	1	4	13	39	54	42	13	9	41	12	26	31	44	10	23	36	13	17	22	23	22	16	12	19	15	8	16	27	18	39	11	21	8	29	53	42
RLTR23	9	23	13	20	32	80	22	20	12	22	36	28	36	12	23	46	107	89	29	38	47	27	30	53	15	7	20	17	20	23	10	15	11	14	26	16	38	16	13	24	11	38	42	32	38	36	39	124	178
RLTR24	21	39	17	30	29	72	30	55	32	44	54	58	22	36	27	31	74	66	41	49	39	40	28	65	58	23	32	33	34	22	36	34	44	35	59	33	37	18	16	40	67	59	73	34	25	33	43	66	30
RLTR24B_MM	11	14	4	12	4	6	7	7	5	6	13	6	18	9	16	6	10	37	30	19	21	20	13	28	6	33	16	11	13	9	5	6	9	6	6	3	15	3	4	18	11	36	13	5	18	17	12	25	14
RLTR25A	17	30	33	33	20	114	12	22	12	24	39	22	46	13	39	12	88	64	16	43	20	21	16	47	18	37	35	10	22	31	17	10	5	10	33	19	26	9	13	21	29	34	34	22	26	29	30	126	49
RLTR25B	79	124	74	107	55	182	78	79	50	87	87	81	131	75	94	123	194	177	107	90	95	73	58	119	100	120	93	45	74	70	43	55	68	42	98	50	88	39	47	74	92	187	135	108	102	116	136	296	405
RLTR26	0	0	0	0	0	8	2	0	3	3	0	1	0	1	2	1	9	8	5	0	0	0	0	1	0	2	0	0	0	0	0	0	0	1	0	0	5	1	1	2	7	2	1	1	1	0	2	12	26
RLTR26B_MM	0	5	0	4	2	5	3	2	7	11	2	1	2	6	7	1	20	18	3	4	4	0	11	7	12	1	1	1	0	4	1	0	1	1	0	0	5	1	2	2	2	2	11	2	11	2	10	15	10
RLTR26C_MM	429	529	305	376	470	275	482	548	267	464	526	523	598	254	417	417	469	311	360	573	490	569	477	729	678	570	410	541	626	496	543	391	424	215	352	291	463	293	206	357	614	765	404	533	490	562	297	465	146
RLTR26D_MM	4	5	3	0	1	10	1	8	3	9	3	10	0	9	1	3	18	19	1	8	1	6	4	6	9	7	3	5	0	2	1	1	2	1	7	5	3	5	3	3	4	14	1	5	4	3	6	14	9
RLTR26_Mus	24	15	10	8	26	23	32	26	20	27	41	34	21	3	25	11	61	49	22	24	32	23	11	51	38	33	43	17	26	17	14	23	15	8	28	17	13	11	22	17	39	54	32	23	23	17	31	49	65
RLTR27	211	276	124	240	264	87	215	226	228	275	429	354	316	140	127	175	221	136	104	236	155	137	167	277	308	337	251	211	269	169	287	243	270	167	202	193	240	103	141	221	228	437	256	318	264	173	316	236	283
RLTR28	45	52	56	33	26	54	35	60	40	60	89	82	86	24	66	60	119	120	50	53	34	53	19	103	40	74	45	46	53	54	36	55	40	31	43	59	48	28	18	32	55	89	69	70	48	44	59	73	68
RLTR28B	41	33	79	49	34	23	34	61	43	33	50	22	50	32	24	36	48	52	34	49	32	54	34	47	56	72	80	23	52	40	5	38	50	33	60	64	27	10	29	37	36	103	49	45	48	95	69	36	48
RLTR30	17	21	51	13	71	9	26	12	21	25	47	33	81	21	34	22	44	81	42	55	41	55	30	90	45	50	25	10	30	21	37	35	31	26	26	23	38	26	23	38	48	67	32	14	51	16	68	64	105
RLTR30B_MM	4	0	0	0	0	4	0	1	0	0	1	9	2	0	17	0	12	14	14	0	2	2	4	3	0	0	0	1	2	0	4	4	0	0	0	0	7	2	0	8	0	0	5	4	0	2	0	9	12
RLTR30C_MM	0	2	0	2	0	1	1	0	1	0	1	1	0	0	7	0	1	1	1	0	0	0	0	0	2	3	3	2	1	2	0	3	0	1	0	0	1	1	2	5	0	1	1	0	2	1	0	0	14
RLTR30D2_MM	14	15	23	31	17	10	12	8	10	10	23	13	10	20	24	25	65	46	59	43	22	22	21	48	18	22	9	22	32	18	16	17	27	22	16	8	23	12	8	17	29	41	41	38	26	34	31	25	41
RLTR30D_MM	3	3	2	0	4	5	6	4	1	1	4	9	17	3	0	3	6	7	4	0	0	12	0	11	11	35	6	13	13	4	5	3	4	2	9	5	3	5	4	2	7	27	12	1	5	4	3	9	105
RLTR30D_RN	0	1	0	0	0	6	2	1	3	1	2	0	2	1	1	2	3	2	3	3	1	1	2	0	0	7	3	1	5	1	0	1	0	3	3	0	4	2	0	5	0	0	2	1	7	1	5	1	20
RLTR30E_MM	244	167	167	209	107	52	80	101	72	153	187	150	572	238	356	311	429	334	334	181	134	164	160	282	84	75	51	59	62	69	74	58	56	43	48	49	41	59	28	70	44	95	74	71	86	78	121	95	52
RLTR31A_Mm	0	1	0	1	2	1	0	2	1	0	1	1	0	3	4	0	1	3	1	2	0	2	1	2	0	4	1	0	0	0	0	0	1	0	3	4	0	0	3	2	0	2	0	4	3	3	5	3	3
RLTR31B2	305	322	215	313	204	188	252	296	272	384	350	468	464	248	261	197	298	272	364	347	278	271	213	385	316	461	232	234	287	375	296	229	200	127	245	161	216	149	103	183	277	266	219	220	303	302	261	252	85
RLTR31B_Mm	7	4	1	1	8	8	4	11	5	9	8	14	1	3	1	6	9	19	0	9	13	13	5	4	1	7	4	6	6	9	4	10	3	4	7	6	7	3	0	4	6	12	19	17	11	11	17	14	2
RLTR31C_MM	34	45	25	18	39	29	49	56	39	42	32	48	28	6	39	16	32	27	19	40	37	33	30	67	45	74	74	32	40	38	33	29	45	16	48	24	25	22	23	37	38	72	55	53	49	63	49	49	43
RLTR31D_MM	247	257	185	252	302	147	232	232	174	261	340	316	342	159	338	263	406	360	207	335	209	269	236	452	317	281	254	248	317	242	329	258	226	120	200	148	171	183	91	192	279	348	228	281	238	270	210	309	422
RLTR31M	74	93	105	41	63	60	58	58	36	57	115	147	156	63	98	88	130	82	94	132	124	75	72	184	102	99	93	88	112	81	33	67	41	48	75	66	137	61	43	117	120	234	89	110	138	118	141	151	163
RLTR31_Mm	23	14	2	16	7	8	8	14	8	13	11	19	25	15	2	4	21	10	9	13	4	10	10	8	36	25	25	5	7	20	3	6	5	5	13	8	18	6	7	10	8	11	7	10	5	7	11	36	4
RLTR31_Mur	4	8	5	8	2	3	1	4	0	11	9	14	5	7	2	6	20	17	5	1	7	8	6	2	5	6	10	2	10	11	9	4	10	1	6	0	10	9	8	4	1	6	6	7	12	0	14	4	11
RLTR33	227	254	184	258	147	92	120	160	96	175	300	347	292	156	224	201	270	265	188	283	201	152	159	197	230	146	159	129	140	381	282	177	199	112	177	100	134	106	109	184	164	256	281	192	200	256	211	418	93
RLTR34B_MM	14	28	27	23	10	23	23	32	21	13	35	53	44	18	63	40	36	53	66	45	19	24	28	29	32	38	29	27	32	35	16	29	17	12	26	18	29	30	11	26	28	27	37	63	30	41	54	51	136
RLTR34C_MM	0	17	1	3	3	12	14	10	5	22	2	16	0	7	18	3	21	25	6	6	14	8	5	24	18	16	2	12	7	1	9	20	5	0	15	10	1	9	3	2	20	2	6	11	7	34	4	39	29
RLTR34D_MM	2	9	0	3	4	11	7	12	16	9	4	6	14	1	1	3	17	16	13	5	7	9	12	22	12	14	6	3	22	4	9	7	11	1	10	4	6	9	4	1	5	13	15	3	20	6	18	13	17
RLTR35B_MM	32	0	5	9	5	15	4	8	7	8	17	19	55	37	49	24	33	41	39	45	37	86	63	77	10	17	3	8	13	4	0	7	3	3	9	2	108	50	20	31	18	54	20	48	25	54	56	180	60
RLTR3_Mm	0	1	22	1	0	1	0	0	5	0	0	2	0	6	7	8	0	8	1	4	12	5	0	6	0	2	1	1	0	2	4	1	1	0	5	1	3	2	3	6	0	7	5	5	6	11	5	1	21
RLTR40	191	281	198	285	186	125	143	165	109	188	251	213	424	177	259	288	364	339	346	259	220	226	194	364	171	170	200	127	170	211	204	149	113	92	177	77	220	147	108	162	186	232	197	259	252	331	272	362	206
RLTR41	57	115	65	88	91	101	63	52	83	88	137	92	213	151	189	154	222	165	151	143	153	137	120	185	70	57	75	30	44	82	80	82	56	39	82	70	114	79	55	56	43	126	75	98	129	114	103	196	234
RLTR41A2	6	0	6	3	8	6	10	17	7	13	14	12	9	2	8	10	18	31	25	31	17	8	6	16	14	10	14	15	16	10	2	12	10	10	7	13	19	5	0	10	15	45	22	31	9	12	18	27	19
RLTR41B	9	0	6	7	0	4	2	2	0	1	0	3	3	3	7	10	7	3	11	6	3	3	5	3	0	5	4	1	2	1	2	1	1	0	0	0	3	4	3	1	2	3	11	1	9	6	15	8	27
RLTR41C	4	8	3	7	23	80	17	2	10	30	16	15	6	1	7	16	34	33	3	18	16	2	3	21	17	31	18	39	55	26	4	39	10	3	19	11	21	12	15	18	25	44	20	22	13	15	14	49	7
RLTR42	8	4	6	12	10	11	2	11	4	13	13	14	9	9	14	8	14	20	24	17	11	24	15	10	14	10	9	2	11	5	7	10	6	8	7	3	6	5	4	8	2	23	12	5	10	12	6	64	13
RLTR42-int	176	229	165	148	163	131	185	218	144	191	175	259	323	110	309	197	300	289	253	284	176	238	181	348	217	236	168	120	180	197	151	195	151	90	194	149	156	124	87	178	173	280	195	244	188	212	356	302	185
RLTR43C	3	10	0	1	12	3	0	9	5	3	10	2	5	3	10	5	12	2	1	6	12	4	6	16	7	8	8	4	4	6	8	0	1	1	7	0	6	5	3	2	4	5	8	8	5	5	8	4	0
RLTR44-int	35	28	59	36	52	19	28	40	28	27	26	64	86	37	62	49	53	40	75	43	42	39	30	84	17	31	20	22	27	32	36	27	24	6	18	14	64	21	15	34	43	62	39	15	40	52	36	43	54
RLTR44A	6	10	19	13	10	5	4	6	9	17	8	9	21	2	12	20	27	6	31	9	25	7	0	16	4	27	8	3	9	1	11	3	7	1	15	2	9	7	11	20	11	16	7	7	9	10	14	14	22
RLTR44B	3	0	2	3	2	3	0	3	5	1	4	10	5	2	3	2	13	6	0	0	6	3	1	6	6	3	4	2	5	0	2	3	1	4	4	2	0	3	1	2	2	1	4	0	5	4	3	7	21
RLTR44C	11	12	12	9	11	9	8	12	13	8	15	22	26	8	17	15	24	39	18	11	13	17	11	30	5	14	13	5	11	11	3	14	7	3	6	1	14	4	3	7	14	20	8	8	4	15	8	35	20
RLTR44D	1	4	1	6	0	0	0	0	6	0	0	0	0	0	0	5	7	5	8	0	4	0	1	2	0	6	3	3	6	0	0	2	0	0	0	0	0	0	0	5	0	2	0	1	3	0	0	3	0
RLTR44E	0	13	0	7	5	5	14	0	1	0	1	12	0	0	0	0	12	8	12	2	6	0	1	5	12	9	5	0	4	3	12	3	6	2	9	13	5	1	6	1	4	16	0	0	7	9	6	20	19
RLTR45	8	9	27	21	29	32	11	12	11	22	29	27	8	11	12	11	41	29	23	19	25	26	16	35	30	27	31	31	26	20	20	19	30	11	25	8	19	11	8	21	20	44	26	22	26	17	19	58	42
RLTR45-int	64	67	86	87	56	32	43	57	56	73	64	77	128	65	110	73	85	88	102	71	62	49	40	79	47	56	57	31	63	68	15	37	35	28	56	29	31	31	18	30	72	81	67	38	37	43	53	63	306
RLTR46	0	2	1	0	0	0	0	0	1	2	0	0	0	0	0	2	2	3	0	1	0	0	1	0	2	0	0	1	3	4	0	1	0	0	3	0	1	0	0	0	4	0	0	0	2	0	0	5	7
RLTR46A	6	7	3	1	6	2	5	8	4	5	12	5	5	1	1	7	10	6	5	3	0	10	6	7	11	8	10	14	23	11	1	9	11	0	16	4	5	3	1	0	12	14	7	13	8	8	8	16	52
RLTR46A2	0	0	0	0	0	1	0	0	0	0	0	0	0	0	0	0	1	1	0	0	0	0	0	0	0	0	0	0	0	0	1	0	0	0	0	0	0	0	1	0	0	0	0	0	0	2	0	6	0
RLTR46B	0	0	0	0	0	0	0	0	0	0	0	0	0	0	0	0	3	3	0	0	0	0	0	0	0	0	0	0	0	0	0	0	0	0	0	0	0	0	0	0	0	1	0	0	0	3	0	1	0
RLTR47	0	0	6	0	0	1	0	0	0	3	2	0	0	1	2	0	3	9	0	2	0	0	2	2	0	1	1	1	3	0	0	1	1	1	0	0	0	1	2	2	0	5	2	0	0	2	5	4	43
RLTR47_MM	6	8	7	4	3	4	0	4	3	4	6	2	7	5	5	4	6	4	6	1	3	1	3	2	4	3	1	0	3	4	8	3	2	3	4	7	2	0	2	3	1	4	1	2	2	3	6	10	1
RLTR48A	3	1	5	5	13	16	10	6	8	31	10	25	14	8	10	9	25	42	19	30	25	38	16	17	17	12	20	15	13	19	17	22	14	4	5	5	13	16	9	15	10	37	7	18	23	13	17	35	84
RLTR48B	0	0	0	0	1	4	0	0	0	0	0	3	0	0	0	0	3	5	1	0	0	0	1	0	0	0	0	0	0	0	2	0	1	0	0	1	0	0	0	1	0	1	0	1	1	0	1	7	12
RLTR48C	124	148	123	187	95	36	89	108	90	118	126	147	298	73	118	104	180	104	70	147	47	33	40	126	154	153	115	91	175	108	82	97	93	66	96	33	63	43	16	67	68	160	108	134	112	87	118	87	57
RLTR49	180	163	145	161	140	75	113	158	93	148	113	215	231	118	109	143	202	170	160	193	138	176	101	248	131	168	141	140	128	131	127	138	78	84	152	93	132	74	70	164	147	219	127	185	138	143	170	195	118
RLTR4_MM-int	2	7	3	2	3	3	2	3	6	2	4	2	3	2	5	2	19	21	0	0	4	2	4	8	1	10	2	9	8	1	2	1	3	4	5	1	7	1	0	1	6	0	2	0	5	6	6	11	82
RLTR4_Mm	0	0	0	0	0	1	0	1	0	0	0	1	0	0	0	0	1	4	0	0	0	0	0	0	0	0	0	0	0	0	0	1	0	0	0	0	0	0	0	0	0	0	0	0	0	0	0	0	0
RLTR50A	0	0	0	0	0	0	0	0	0	0	0	0	0	0	0	0	2	2	0	0	0	0	0	0	0	0	0	1	0	0	0	0	0	0	1	0	0	0	0	1	0	0	0	0	1	0	1	3	4
RLTR50B	37	81	54	45	70	59	69	64	62	70	93	82	60	15	53	36	74	45	55	85	49	64	94	107	106	118	103	65	116	62	71	79	64	37	54	61	63	41	37	87	70	71	71	105	91	81	119	127	46
RLTR51A_Mm	69	131	79	117	88	38	80	64	82	122	106	146	152	71	131	96	112	116	108	90	87	76	60	136	106	116	90	90	92	120	73	85	80	58	115	87	86	51	39	74	53	156	102	76	103	89	112	145	131
RLTR51B_Mm	110	83	39	59	60	39	37	61	62	51	60	79	60	35	15	65	53	62	31	41	25	26	20	85	125	189	169	69	117	75	62	64	37	27	83	34	56	18	33	45	96	140	67	79	93	44	81	94	114
RLTR53B_Mm	7	0	2	0	0	1	2	5	1	3	3	1	0	1	1	2	5	4	3	1	7	0	3	2	1	6	0	1	4	8	1	4	2	0	2	2	3	0	0	2	1	2	0	3	2	4	5	0	8
RLTR53_Mm	3	9	13	4	12	6	3	17	14	11	6	22	26	11	8	16	24	25	23	37	14	23	8	12	10	14	8	18	30	9	18	11	14	10	16	1	13	8	5	20	23	56	29	25	11	27	21	24	6
RLTR5_Mm	3	3	6	4	7	3	4	6	4	4	9	0	5	0	15	7	23	7	13	8	0	4	13	13	4	3	4	1	0	1	8	3	8	5	0	3	5	3	6	3	6	5	2	3	7	6	5	31	3
RLTR6-int	135	179	83	124	105	75	88	132	108	155	119	178	181	89	126	116	165	121	113	142	135	146	97	177	176	152	153	91	111	130	126	82	98	81	125	87	116	84	94	141	168	268	150	152	158	175	221	142	94
RLTR6B_Mm	149	137	68	138	110	49	74	105	69	124	141	175	127	72	96	88	118	67	109	89	74	89	82	193	147	121	144	123	131	128	164	94	93	45	92	75	106	84	49	90	142	176	114	163	131	112	138	154	47
RLTR6C_Mm	4	8	1	3	0	2	4	1	0	2	1	6	0	0	4	0	1	0	1	1	0	0	0	0	0	0	0	2	5	3	0	0	0	0	4	0	3	0	0	0	0	4	2	0	0	3	1	1	3
RLTR6_Mm	2	1	2	9	2	2	2	2	3	1	4	1	1	1	4	2	4	6	4	11	6	1	9	4	2	9	1	2	4	6	3	1	2	4	4	0	2	0	0	3	5	7	3	5	5	3	6	8	2
RLTR8	4	5	1	5	6	13	7	14	11	18	39	36	39	3	23	23	29	19	26	29	17	9	11	22	7	7	8	6	23	17	4	21	17	10	14	9	6	7	5	7	11	34	16	13	13	7	6	24	18
RLTR9A	1	16	22	2	21	96	14	21	32	16	9	32	12	10	22	5	61	49	22	25	16	17	11	34	21	18	23	10	14	17	14	25	8	11	20	42	12	10	11	16	29	31	23	26	28	19	24	40	28
RLTR9A2	2	3	6	4	11	41	4	4	7	9	3	11	3	3	2	8	26	19	6	10	8	4	10	1	9	13	4	1	10	6	0	1	2	5	2	3	5	8	3	0	9	10	0	6	8	6	10	21	3
RLTR9A3	31	24	22	22	70	172	44	35	45	57	60	81	55	20	32	27	108	70	53	49	84	36	24	94	63	83	69	30	57	43	52	68	36	26	56	38	47	23	18	44	57	114	87	63	34	43	70	140	74
RLTR9A3A	9	3	6	10	6	19	5	5	3	7	14	10	1	2	4	9	10	21	80	13	17	7	5	5	11	5	7	9	0	1	4	4	3	3	10	6	2	0	5	6	21	30	7	11	10	6	6	19	77
RLTR9A3B	1	27	3	3	2	24	5	9	9	22	10	4	12	5	4	19	25	29	5	14	17	10	1	12	11	11	9	10	6	7	12	16	8	8	15	9	12	8	3	8	6	12	17	4	4	11	17	46	2
RLTR9A4	0	0	1	3	0	1	0	0	0	0	0	0	3	0	0	0	4	0	1	0	0	1	0	5	2	0	0	0	0	4	0	3	4	0	0	3	0	2	0	0	0	3	3	0	0	0	1	1	0
RLTR9B	1	0	0	1	2	39	4	1	4	1	0	1	15	0	2	0	36	16	5	1	6	5	1	9	10	1	2	12	4	4	0	0	2	0	8	1	0	3	0	2	9	14	0	9	7	0	6	14	0
RLTR9B2	0	5	0	0	3	21	1	0	0	2	1	2	2	0	0	0	13	8	0	1	2	0	0	3	0	0	4	1	0	0	0	2	3	0	1	0	5	1	0	0	2	3	0	3	0	0	0	5	0
RLTR9C	5	0	0	2	1	5	5	4	3	1	8	5	5	4	1	14	16	17	4	8	2	1	0	7	4	3	2	2	4	10	0	0	6	0	7	1	11	7	2	1	7	11	8	4	2	1	8	26	5
RLTR9D	83	133	69	67	104	219	79	111	64	78	149	190	175	52	136	71	258	158	138	179	85	118	87	191	42	74	71	76	94	135	87	99	70	33	61	53	97	47	31	112	90	93	190	92	124	80	154	208	140
RLTR9D2	34	40	24	29	31	108	44	38	26	51	35	72	40	26	28	30	73	56	27	55	42	25	22	46	46	78	76	28	45	53	56	45	27	27	59	34	21	16	15	45	33	69	51	36	34	65	42	77	25
RLTR9E	50	83	39	43	56	342	51	39	52	67	38	102	64	34	50	65	288	214	61	65	43	42	63	96	56	54	59	42	50	61	38	49	60	34	52	26	55	18	28	46	73	84	52	50	54	67	58	281	104
RLTR9F	9	4	2	29	10	30	18	18	15	16	36	34	24	4	17	6	21	14	4	16	21	12	15	26	18	46	38	24	39	20	19	30	14	13	16	8	49	9	15	15	39	38	16	29	23	25	23	42	42
RLTRETN_Mm	6	7	17	20	33	33	14	19	11	31	35	40	30	6	26	40	68	73	58	67	36	57	44	57	33	30	22	26	23	23	34	23	27	17	29	11	34	32	14	28	47	80	28	42	37	29	36	93	70
RMER10A	61	124	80	63	114	273	92	93	114	130	135	142	147	34	107	89	240	252	77	131	134	122	97	190	136	242	159	124	168	132	71	117	73	59	128	107	124	53	44	125	147	269	117	171	150	164	161	264	185
RMER10B	91	75	61	71	85	112	72	87	61	68	94	117	156	63	105	82	177	153	134	73	119	88	101	151	94	112	125	81	110	79	58	78	46	42	74	40	109	46	61	92	167	427	136	96	137	161	153	198	135
RMER12	180	207	231	171	263	125	194	170	163	245	255	334	259	134	286	261	356	229	258	285	207	237	231	358	239	256	200	163	287	297	209	187	228	149	261	158	163	168	117	197	218	329	311	241	201	221	255	305	191
RMER12B	24	18	40	52	48	17	27	22	40	26	62	115	24	13	68	48	74	45	25	60	19	53	24	54	41	34	19	18	25	48	31	42	12	21	26	23	26	21	5	27	34	28	36	32	28	24	13	95	54
RMER12C	41	74	70	44	56	35	41	39	45	59	52	92	71	44	50	41	77	88	55	57	39	49	38	71	46	32	35	36	48	51	39	50	30	36	43	13	26	39	18	35	33	70	49	62	56	72	48	90	67
RMER13A	61	86	46	62	70	71	80	97	67	60	70	118	127	78	74	50	107	70	76	93	134	105	78	142	51	71	85	51	71	57	60	59	52	46	61	28	60	54	57	77	112	168	100	109	140	143	119	160	85
RMER13A1	2	2	4	0	3	10	5	11	0	3	7	7	6	1	8	3	39	59	2	6	4	2	1	12	13	6	5	7	6	15	2	0	5	2	9	3	2	2	2	21	5	2	13	4	3	9	5	28	26
RMER13A2	62	36	32	49	64	41	51	57	73	78	90	83	140	38	49	65	142	110	72	60	93	67	34	117	95	150	116	42	67	64	23	41	62	43	83	44	61	42	41	58	88	158	106	111	96	128	122	156	238
RMER13B	251	166	151	187	248	140	211	288	163	216	346	381	480	143	233	256	323	326	193	266	195	209	162	243	220	179	159	160	217	205	198	171	180	113	169	120	208	147	91	171	209	373	175	268	315	217	243	231	233
RMER15	1658	1899	1297	1625	1401	830	1210	1258	1049	1496	1906	2092	2849	1393	1912	1689	2346	2004	1845	2020	1448	1478	1327	2349	1718	1874	1445	1368	1715	1732	1632	1369	1244	792	1431	867	1491	1031	758	1275	1514	2468	1588	1984	1570	1817	1880	2157	1847
RMER15-int	102	87	129	92	67	80	74	85	51	80	98	97	204	93	125	88	167	167	100	47	103	75	49	123	88	68	64	56	67	90	55	71	50	44	54	33	63	54	36	65	95	163	158	91	96	98	105	97	78
RMER16	8	10	34	12	18	11	14	20	16	16	27	21	65	16	18	20	32	46	25	26	57	11	38	37	27	19	23	15	27	26	11	25	16	10	11	15	25	6	13	25	16	37	22	26	30	14	19	64	82
RMER16-int	760	927	592	676	604	419	593	930	694	726	903	1373	1301	579	648	482	910	727	730	838	892	690	470	1079	683	838	713	387	672	542	561	659	493	361	539	438	573	318	354	596	534	746	666	580	953	859	1240	1312	629
RMER16A2	0	1	0	2	1	21	0	2	0	0	0	0	0	3	2	3	16	12	0	2	0	0	0	0	0	0	0	0	2	9	0	0	0	0	5	0	0	1	2	0	1	0	1	5	0	0	0	18	29
RMER16A3	0	0	0	0	0	13	2	1	1	0	0	0	2	0	0	6	10	12	0	1	1	1	0	3	0	0	0	1	1	1	0	0	1	0	0	0	1	0	0	0	3	0	1	0	1	3	0	20	6
RMER16B	7	0	5	2	9	2	2	5	3	13	5	16	3	5	8	2	11	9	14	10	11	10	2	15	4	5	10	4	10	2	9	18	8	4	14	2	1	3	11	8	18	24	15	12	5	10	15	10	0
RMER16B2	0	1	1	0	0	18	1	2	1	3	2	2	0	2	3	3	15	17	1	4	1	0	0	5	1	4	3	0	0	1	0	0	0	0	1	0	0	1	0	0	3	2	0	1	2	0	0	28	32
RMER16B3	0	0	2	0	0	0	0	0	1	0	2	0	0	0	3	1	0	3	1	0	0	0	0	0	1	0	0	0	0	0	0	0	0	0	0	0	0	0	0	0	0	5	2	0	0	3	0	4	8
RMER16C	3546	2506	2058	2973	2501	1270	1989	2310	1518	2405	3548	3706	4022	1573	1730	2724	2829	2264	1731	2384	1372	1912	1632	3117	2797	2362	2046	3091	3669	3028	2971	1890	1740	837	2745	1210	1239	1382	641	1351	1808	2300	1441	1904	1776	1479	1723	1554	531
RMER16_Mm	282	462	188	321	245	104	238	288	255	244	384	467	464	206	280	216	258	217	228	253	274	211	165	359	256	377	273	167	352	233	230	291	230	108	229	169	149	111	101	186	180	295	216	228	283	243	354	306	189
RMER17A	19	20	25	14	10	11	10	6	12	19	10	13	17	14	14	16	28	35	20	25	25	13	17	19	17	20	12	5	22	13	16	12	9	3	19	13	15	11	10	32	75	125	60	43	81	21	57	53	68
RMER17A-int	0	1	0	0	0	3	0	5	3	2	2	2	3	2	3	3	8	8	9	5	0	1	4	8	1	11	21	0	2	2	1	5	1	12	3	4	5	3	0	7	6	5	1	4	11	6	16	7	6
RMER17A2	7	24	17	14	10	12	16	13	6	17	28	28	28	7	35	21	36	47	24	15	15	18	10	37	21	12	5	7	2	7	23	2	9	6	23	12	17	10	17	13	21	14	21	19	16	20	39	46	12
RMER17B	15	32	24	52	52	47	43	29	18	24	41	41	44	60	117	72	124	103	63	90	72	59	63	66	46	55	47	33	48	40	20	32	24	26	56	32	70	28	26	40	54	95	64	57	65	62	81	119	88
RMER17B2	42	27	34	28	18	13	8	18	14	17	27	24	49	6	86	35	80	62	34	38	43	11	19	18	27	14	19	14	15	11	31	37	9	0	3	11	17	26	13	14	39	47	28	20	19	7	36	52	43
RMER17C	175	283	487	245	657	323	315	328	312	572	504	1051	479	371	689	486	675	540	476	1149	777	713	683	1166	432	363	368	438	470	529	441	482	348	279	509	330	854	788	575	898	1118	1619	1022	1401	956	738	971	1341	423
RMER17C-int	117	34	19	37	73	40	43	37	23	56	53	58	61	41	113	55	125	119	135	159	27	102	63	80	72	58	31	57	43	34	45	34	43	23	43	43	55	107	41	72	103	134	63	74	90	68	156	160	50
RMER17C2	16	10	29	11	13	18	11	25	16	20	24	32	19	14	21	11	44	34	33	34	34	35	35	35	26	33	20	24	14	36	28	22	14	14	21	8	14	17	23	29	62	72	48	27	30	30	33	54	35
RMER17D	95	206	246	203	155	120	141	224	166	199	171	180	430	290	338	305	397	407	494	301	357	271	173	362	132	159	149	61	113	113	76	130	135	82	174	124	174	100	170	226	146	260	174	200	214	368	350	366	198
RMER17D2	3	24	64	7	72	64	14	10	16	35	28	26	7	11	45	45	84	78	266	93	106	62	12	55	7	17	17	9	9	23	32	22	17	17	47	13	57	18	14	56	156	46	42	39	85	23	33	99	36
RMER19A	296	456	270	365	537	324	419	477	466	546	615	662	473	266	412	388	452	432	427	677	727	513	447	1096	644	981	783	461	634	432	484	610	514	372	696	487	564	439	327	683	680	1392	761	950	709	753	979	1023	647
RMER19B	1419	2029	1530	1530	1739	1338	1415	1942	1569	2498	2696	2784	2549	1260	1789	1779	2182	1966	2095	2486	2660	1838	1695	3672	2215	3058	2681	1586	2054	1960	1520	2475	1911	1388	2892	1682	1904	1287	1145	2300	2324	4463	2659	2764	2586	3229	3697	2821	2229
RMER19B2	96	145	147	157	156	103	122	178	116	199	209	313	296	174	194	158	270	307	266	272	244	284	150	385	166	228	228	136	162	162	164	167	145	87	182	107	161	102	92	146	199	268	194	195	187	162	209	346	345
RMER19C	318	369	320	370	502	330	361	469	309	543	666	911	678	312	439	428	532	460	606	615	660	590	621	876	566	686	555	388	576	442	523	595	410	230	622	379	564	333	323	565	704	1051	624	782	557	698	814	958	497
RMER1A	111	113	127	103	100	68	92	125	101	150	124	153	144	64	121	124	167	232	91	125	127	83	132	149	122	173	114	71	131	101	91	112	83	62	95	56	134	64	66	132	107	210	125	155	158	210	195	219	254
RMER1B	348	619	552	448	411	309	448	470	345	607	678	701	785	388	947	736	904	853	985	727	909	643	605	941	565	671	572	373	456	437	441	516	354	297	569	372	554	440	314	542	682	1622	795	837	690	935	743	1004	1472
RMER1C	5974	6551	4119	3823	4484	2199	4395	4205	2639	5442	6481	6601	6585	3219	6360	4052	6672	4836	4611	6199	3006	4088	3829	8063	3869	3567	2823	2700	4469	3277	4370	3781	2982	2308	2488	2471	2562	2970	1152	2048	2651	3782	2869	4041	3480	3448	4186	4702	2653
RMER2	75	120	79	60	82	50	70	84	72	54	55	74	74	58	108	56	128	154	72	88	109	84	57	95	50	76	72	39	63	71	58	37	33	24	69	50	33	25	31	65	82	109	78	65	86	107	87	145	315
RMER20A	186	145	90	191	134	167	156	165	110	166	199	231	240	137	130	118	192	170	136	199	167	135	158	268	337	335	278	216	260	178	193	156	122	70	143	96	136	119	80	124	223	325	169	259	162	177	174	286	169
RMER20B	74	58	58	51	50	85	36	51	63	45	52	83	107	50	41	49	114	92	53	62	77	69	54	89	76	109	94	69	59	41	35	53	53	21	60	33	74	33	19	73	58	138	95	115	71	119	81	102	536
RMER20C_Mm	40	32	9	21	25	34	27	37	18	31	36	34	37	19	15	28	50	71	25	38	20	35	15	42	43	42	22	26	31	38	16	35	21	15	23	9	34	19	14	23	37	57	34	49	44	50	35	76	78
RMER21A	81	117	77	86	105	64	96	122	86	155	112	123	175	89	150	115	159	179	114	191	222	164	180	297	213	237	138	155	145	124	107	119	121	105	79	85	279	115	120	160	215	295	223	365	173	410	338	298	120
RMER21B	17	16	12	11	27	27	8	12	11	25	16	30	23	7	11	20	36	26	15	10	17	15	8	26	26	25	9	11	11	13	17	12	8	7	15	10	20	5	16	4	16	20	18	15	10	20	23	34	36
RMER30	193	278	268	327	298	138	169	203	217	290	311	303	390	191	385	293	457	395	361	526	384	269	300	590	264	338	316	196	298	194	254	248	221	158	219	199	232	213	127	306	228	446	281	362	301	400	360	438	208
RMER3D-int	176	348	310	263	210	149	178	205	174	172	278	278	483	363	486	364	434	423	373	377	288	433	366	575	223	332	294	158	236	233	163	167	205	123	192	149	264	154	132	217	259	286	328	214	247	316	303	410	282
RMER4A	73	114	79	85	102	87	120	124	130	151	164	162	151	82	169	91	116	129	87	180	166	118	93	210	136	208	173	96	120	98	122	146	100	93	146	112	121	66	57	149	141	278	180	174	153	195	236	236	162
RMER4B	248	248	221	242	284	272	321	341	257	331	379	432	432	249	317	242	423	384	369	519	452	366	439	695	419	433	368	285	346	402	304	282	303	194	322	265	497	299	195	416	409	793	536	604	432	628	516	569	716
RMER5	505	662	566	648	672	495	696	646	456	654	655	1069	870	494	707	568	989	855	609	805	637	760	566	959	651	665	636	458	640	604	461	502	426	359	443	408	460	439	314	533	656	919	570	765	800	756	734	1020	796
RMER6-int	2	34	3	32	17	8	15	11	11	24	17	21	31	11	8	8	16	33	30	12	21	11	17	57	16	22	27	19	14	12	12	28	8	7	10	20	14	7	47	13	3	39	11	34	14	46	45	50	76
RMER6A	174	241	204	170	225	183	187	219	172	246	285	381	435	192	333	338	508	438	380	396	358	262	224	339	200	285	207	156	157	134	197	180	145	130	225	134	209	147	145	237	267	491	287	189	254	306	341	440	370
RMER6B	28	38	36	58	55	30	23	22	25	51	55	51	48	28	56	41	113	84	48	51	41	46	26	56	51	54	33	31	34	51	33	43	49	15	32	21	21	27	14	38	56	63	30	28	39	31	60	83	112
RMER6BA	86	119	84	82	102	91	85	78	58	110	126	225	120	98	117	113	131	114	254	191	194	101	117	156	89	109	75	54	93	99	125	89	83	34	105	55	67	41	57	127	172	329	283	80	145	150	122	173	68
RMER6C	89	69	42	52	57	60	58	35	45	78	104	139	144	22	136	107	158	213	138	85	112	88	109	142	67	84	83	56	81	69	51	66	37	39	74	43	106	55	37	55	210	165	141	126	67	90	156	263	159
RMER6D	18	24	29	18	32	16	40	17	28	28	52	21	16	25	47	18	59	86	34	18	79	9	37	46	17	55	24	20	11	21	24	8	13	10	9	5	23	7	9	10	36	38	48	37	33	31	16	50	105
RNERVK23-int	0	0	0	0	0	0	0	0	0	0	0	0	0	0	0	0	1	0	0	0	0	0	0	0	0	0	0	0	0	0	0	0	0	0	0	0	0	0	0	0	0	0	0	0	0	0	0	0	1
RNLTR23	0	0	0	0	0	1	0	0	0	0	0	0	0	0	0	0	0	0	0	0	0	1	0	0	0	0	0	0	0	0	0	0	0	0	0	0	0	0	0	0	0	0	0	0	0	0	0	0	0
RSINE1	15681	19496	14669	16176	14693	8436	12572	14774	10925	17584	20378	26702	25837	12261	19830	17129	21673	19203	17026	19867	15274	16084	12192	22926	14930	17052	13116	12738	15828	15383	14643	14344	12845	7280	14259	10105	12395	8632	7406	12819	12573	22193	15231	15949	13871	16936	16487	17259	9409
Ricksha	0	0	0	0	0	0	0	3	1	3	0	0	0	0	0	0	0	4	0	0	0	0	0	3	0	0	0	0	0	0	0	0	0	0	0	0	0	0	0	0	0	0	1	0	0	0	0	2	7
Ricksha_0	0	0	1	2	0	0	0	0	0	3	0	2	0	0	0	1	3	1	0	0	0	1	0	1	0	0	0	0	0	1	0	3	1	0	1	1	2	0	1	1	0	1	0	0	0	0	2	3	0
Ricksha_a	0	0	0	0	0	0	0	0	0	0	0	0	0	0	0	0	0	2	0	0	0	0	0	0	0	0	0	0	0	0	0	0	0	0	0	0	0	0	0	0	0	0	0	0	0	0	0	1	0
Ricksha_b	17	20	17	23	21	28	17	19	17	23	11	28	14	9	6	25	29	10	8	19	28	23	16	39	34	23	19	16	22	14	17	23	20	9	17	16	27	12	19	28	23	90	29	22	40	29	19	35	52
Ricksha_c	2	5	14	4	2	6	1	4	6	2	10	0	5	9	17	14	14	8	2	3	5	4	8	5	4	3	2	0	2	3	3	3	1	1	6	3	6	1	3	3	3	3	10	3	9	8	4	9	1
RodERV21-int	41	39	20	25	29	40	13	22	19	14	18	16	50	8	15	26	59	95	35	23	35	22	41	19	41	28	42	16	21	26	24	20	28	11	31	46	48	3	15	58	40	32	72	31	35	26	40	49	117
SRV_MM-int	60	77	127	51	53	47	86	102	74	95	109	98	159	51	137	158	138	144	223	126	178	105	77	224	76	94	75	35	57	73	54	63	74	44	89	65	80	36	74	106	73	124	70	86	119	144	92	103	108
SSU-rRNA_Hsa	1935	5598	2013	1470	1291	1863	2040	1590	1633	2292	1495	1221	1978	1758	1181	1241	1614	2049	625	1907	2610	1064	1465	5314	4576	11482	8301	2272	3853	1429	1631	2667	2921	3792	4233	3873	2668	1182	2617	5398	7649	22494	21506	7900	5600	3287	7633	3750	1388
SUBTEL_sa	2	2	0	0	0	1	0	0	0	0	0	0	0	0	0	0	0	0	0	0	0	0	0	0	0	0	1	0	0	1	0	0	0	0	0	0	0	0	0	0	0	0	0	0	0	0	0	0	0
SYNREP_MM	0	0	0	0	0	12	0	0	0	0	0	0	0	0	0	0	11	37	0	0	0	0	0	4	0	0	0	0	0	0	0	0	0	0	0	0	0	0	0	0	0	0	2	0	1	0	0	33	0
T-rich	5277	7126	5553	5544	5080	3627	4677	6121	4769	6966	7191	8344	9267	4524	6929	6061	7141	5895	7040	7643	7071	6119	4889	9900	6297	9378	7328	4536	6220	6255	5767	7132	5298	4284	7647	5378	5105	2973	3312	6567	4898	10713	8229	8531	6962	9175	9873	8725	2465
Tigger1	45	50	36	37	25	33	41	41	32	30	53	44	56	24	74	43	61	52	46	43	62	67	55	73	77	85	98	55	40	64	22	38	43	22	49	49	63	40	29	86	41	115	88	83	24	81	83	125	50
Tigger10	113	144	68	91	51	35	74	105	59	86	108	160	225	132	101	67	145	107	127	79	46	56	58	171	67	122	81	29	73	80	40	68	59	31	60	31	79	39	19	43	53	77	45	24	87	77	73	119	158
Tigger11a	0	0	0	0	0	0	0	0	0	0	0	1	0	0	1	0	1	1	0	0	0	0	0	1	0	0	0	1	0	5	0	0	0	0	0	0	0	0	0	0	0	1	0	0	0	0	0	0	0
Tigger12	85	129	80	121	97	39	98	57	53	106	135	133	132	79	95	101	89	85	68	105	71	61	54	135	121	135	116	157	154	117	93	109	97	56	83	76	97	126	63	101	124	190	122	205	97	123	138	119	145
Tigger12A	0	0	0	0	0	0	1	0	0	0	0	0	0	0	0	1	2	1	1	5	0	0	0	0	0	1	0	0	0	0	0	0	0	0	0	0	0	0	0	0	0	0	0	0	2	0	0	2	4
Tigger12c	10	17	11	6	2	3	5	5	8	3	19	5	29	30	39	55	23	45	11	15	4	4	4	9	11	5	4	9	5	16	13	7	7	7	4	8	15	9	2	10	10	16	9	22	20	14	8	11	15
Tigger13a	3	17	6	2	9	7	4	0	6	17	3	12	11	10	6	6	20	16	5	5	3	7	2	15	1	2	11	3	8	2	9	8	11	3	2	6	3	0	1	1	8	5	2	21	9	5	9	25	9
Tigger14a	120	102	83	118	86	38	96	75	92	113	137	125	181	90	114	98	146	133	121	119	106	115	102	202	127	176	89	102	101	136	65	106	72	60	125	66	117	94	56	95	157	210	136	135	100	168	114	166	58
Tigger15a	147	214	171	168	146	104	131	176	169	165	147	253	248	106	171	89	165	188	159	245	217	212	139	356	167	216	153	98	146	124	153	180	160	95	155	103	171	92	73	124	112	223	136	140	158	250	256	155	83
Tigger16a	11	6	11	16	6	7	3	10	6	1	11	9	11	4	6	5	16	14	5	8	9	12	2	9	16	8	7	3	6	11	4	4	3	1	12	9	1	2	1	7	6	25	12	3	6	10	13	6	25
Tigger16b	39	61	29	50	46	21	31	54	30	39	42	34	72	21	12	22	42	16	26	40	32	35	18	58	36	34	32	20	21	30	28	32	35	25	25	19	24	16	13	18	35	61	38	32	27	32	25	26	31
Tigger17	27	14	18	9	15	8	9	27	20	17	9	10	29	4	24	24	9	23	8	20	30	11	13	21	17	8	14	12	5	3	18	24	26	7	38	33	7	12	6	24	17	57	10	21	27	34	18	13	34
Tigger17a	68	89	28	80	37	27	54	54	37	68	71	98	115	82	84	93	134	124	81	53	66	53	59	115	29	60	29	39	39	78	47	23	31	19	46	21	56	26	41	26	41	69	42	35	66	68	65	86	5
Tigger17b	0	0	0	0	0	0	0	0	0	0	0	0	0	0	0	0	3	1	36	0	0	0	1	0	0	0	0	0	0	0	0	0	0	0	0	0	1	0	0	0	0	0	0	0	0	2	0	2	2
Tigger17c	1	4	8	0	0	3	4	2	9	4	3	7	9	1	3	3	16	27	9	7	6	8	0	10	3	2	3	0	7	4	3	2	2	8	16	11	11	1	1	4	1	21	1	3	10	10	6	27	29
Tigger18a	6	1	5	4	1	23	0	2	0	3	6	6	2	1	0	2	8	10	2	3	0	4	1	2	4	6	4	3	2	4	1	2	0	1	5	1	0	0	1	4	1	6	3	1	5	1	6	14	10
Tigger19a	810	1012	922	948	728	445	616	928	590	736	959	1265	1636	850	1160	866	1217	1101	1118	1166	734	796	636	1376	819	1029	808	517	767	925	707	750	582	491	851	606	685	385	348	733	530	1061	855	695	880	1133	963	867	147
Tigger1a_Art	0	0	0	0	0	0	0	0	0	0	0	0	0	0	0	0	0	0	0	0	0	0	0	0	0	0	0	0	0	0	0	0	0	0	0	0	0	0	0	0	0	0	0	0	0	0	0	0	0
Tigger20a	5	9	7	6	1	7	1	9	19	25	11	9	17	15	15	5	5	12	8	12	15	10	5	12	9	18	16	6	8	13	13	7	12	1	10	5	8	1	7	16	5	8	25	6	7	19	13	8	7
Tigger2b	123	168	233	99	235	120	144	144	104	347	388	604	424	254	471	264	435	391	402	433	401	453	179	485	96	88	91	184	109	119	218	229	204	132	190	185	258	260	111	201	156	291	195	317	192	395	308	489	68
Tigger5	196	267	120	198	130	91	159	156	121	203	231	275	243	171	148	205	268	264	156	199	175	175	127	293	158	164	155	95	122	124	88	108	77	73	109	83	122	56	69	103	175	242	129	173	154	161	173	146	135
Tigger5b	91	109	63	69	68	55	78	104	89	101	120	149	150	67	120	80	113	133	116	146	163	100	120	148	115	145	95	80	96	84	95	76	79	62	96	62	92	61	58	109	106	210	127	141	165	163	164	204	176
Tigger6a	12	19	31	28	22	23	19	30	17	26	11	46	85	20	22	35	56	38	34	29	44	39	23	46	32	26	28	10	17	25	27	16	6	9	35	26	25	29	17	29	46	56	42	34	47	47	19	46	79
Tigger6b	6	8	15	9	10	3	2	5	7	9	7	8	14	5	11	5	16	17	19	16	4	11	3	13	9	9	20	7	5	12	4	1	1	0	10	0	20	1	9	6	2	46	7	27	6	22	9	18	0
Tigger7	384	342	304	319	260	201	238	268	188	323	397	426	685	373	364	529	762	561	683	495	376	341	312	558	230	252	205	161	235	254	174	254	221	105	252	130	176	187	125	314	202	433	289	282	299	420	399	466	125
Tigger8	0	0	0	0	0	1	0	0	0	5	2	1	0	0	4	0	4	4	5	12	1	1	0	0	0	0	3	2	0	0	6	0	0	1	1	0	0	0	0	2	0	0	2	1	2	3	1	6	6
Tigger9a	10	4	6	8	4	12	5	16	11	6	5	10	8	7	5	6	14	9	5	12	8	2	10	14	9	19	6	2	4	17	6	8	3	0	6	6	5	2	3	0	6	8	5	6	5	5	3	7	0
Tigger9b	3	3	7	0	4	3	2	3	0	7	3	1	1	0	3	0	25	14	14	7	7	3	0	2	7	5	9	3	0	1	7	10	0	2	3	3	0	1	1	1	11	5	0	10	6	3	6	10	31
U1	2	1	2	1	0	8	3	5	5	2	4	5	0	1	0	0	2	8	7	3	1	2	3	4	5	6	3	2	6	0	0	6	4	0	3	1	0	2	0	0	2	4	2	2	4	1	1	1	0
U13	0	2	0	1	0	0	0	0	1	3	4	4	5	2	0	0	1	0	0	1	0	0	0	0	6	2	4	1	4	1	0	2	0	0	0	0	1	0	0	2	3	9	1	4	0	3	0	1	0
U13_	0	0	0	0	0	0	1	0	0	1	0	0	3	0	0	0	1	1	0	2	0	0	0	0	0	0	0	0	0	0	0	0	0	2	0	0	0	0	0	0	0	0	0	1	1	0	0	1	0
U14	0	0	0	0	0	0	0	0	0	1	0	0	0	0	0	0	0	1	0	0	0	0	0	2	0	0	0	0	0	0	0	0	1	0	0	0	0	0	0	0	0	0	2	0	0	0	0	0	0
U17	0	0	0	2	0	0	2	0	2	2	1	5	1	1	0	3	1	0	3	5	5	14	3	20	22	14	4	1	14	10	5	6	2	8	16	9	62	14	11	33	21	7	44	59	0	22	10	40	0
U2	183	286	203	220	142	97	189	223	158	212	254	275	354	166	250	217	246	204	226	242	219	203	133	364	176	283	231	126	164	196	148	207	135	115	250	127	130	58	81	164	147	215	186	222	214	253	280	214	101
U3	0	0	1	0	0	2	0	1	0	0	0	2	2	0	0	0	2	1	0	1	2	0	0	0	3	4	0	1	0	0	1	1	4	1	1	1	0	1	0	0	1	1	0	4	1	1	0	2	0
U4	5	4	3	5	2	3	2	2	3	2	1	3	10	5	5	3	0	4	0	1	1	0	0	4	1	1	0	2	3	0	1	3	3	1	1	0	1	0	0	1	5	4	1	1	5	1	0	6	5
U5	120	78	74	41	50	21	21	42	27	60	73	76	137	37	82	121	123	79	121	73	48	68	28	88	40	70	58	41	34	59	34	52	54	30	53	32	20	30	17	22	46	53	36	48	47	34	42	41	85
U6	144	138	97	141	122	52	90	78	63	158	197	170	351	111	236	165	217	123	110	176	89	87	98	182	159	163	101	127	208	166	169	167	124	60	148	87	104	139	48	78	144	178	112	171	134	125	174	252	110
U7	1	0	0	0	0	1	0	0	0	1	3	0	0	0	0	0	1	2	0	0	0	1	0	0	2	2	0	0	0	0	0	0	1	0	1	0	0	0	0	0	3	1	1	1	0	0	0	2	0
U8	0	0	0	0	0	1	0	0	0	0	0	0	0	0	0	0	0	0	0	0	1	1	0	1	1	3	1	1	1	3	0	1	1	0	2	0	0	0	0	1	0	0	0	1	0	0	0	1	0
UCON1	0	0	0	0	0	0	0	0	0	0	0	0	0	0	0	0	0	0	0	0	0	0	0	0	0	0	0	0	0	0	0	0	0	0	0	0	0	0	0	0	1	0	0	0	0	0	0	0	0
UCON10	0	2	3	0	0	0	0	0	0	0	0	0	0	0	0	0	1	1	0	0	0	0	0	0	0	0	4	0	0	0	0	3	0	0	0	0	0	0	0	0	0	0	0	0	0	0	0	0	0
UCON11	0	0	0	0	0	1	0	0	0	0	0	0	0	0	0	0	0	0	0	0	0	0	0	0	0	0	0	0	0	0	0	0	0	0	0	0	0	0	0	0	0	0	0	0	0	0	0	0	0
UCON12	0	0	4	1	0	0	2	1	0	1	3	1	0	0	4	0	4	0	2	6	2	0	0	1	1	14	1	0	0	1	0	0	0	1	5	14	0	2	2	0	0	5	5	10	0	2	1	2	0
UCON12A	0	0	0	0	0	0	0	0	0	0	0	0	0	0	0	1	0	0	0	0	0	0	0	0	0	0	0	0	0	0	0	0	0	0	0	0	0	0	0	0	0	0	0	0	0	0	0	0	0
UCON13	0	0	0	1	0	7	0	0	0	0	0	0	0	0	0	0	5	0	0	0	0	0	0	0	0	0	0	0	0	0	0	1	0	0	0	0	0	0	0	0	0	0	0	0	0	1	0	3	0
UCON14	6	9	0	6	1	7	8	3	4	8	7	2	10	2	1	5	2	2	4	3	10	8	7	23	16	22	12	4	13	1	18	10	7	0	7	7	4	7	5	4	16	17	16	6	19	1	11	9	56
UCON15	0	0	4	0	0	0	0	0	0	0	0	0	2	0	1	1	0	1	1	0	0	0	0	0	0	0	0	0	0	0	4	0	0	0	0	0	0	0	0	0	0	0	0	0	0	0	1	0	0
UCON16	0	0	0	0	0	0	0	0	0	0	0	0	0	0	0	0	0	0	0	0	0	0	0	0	0	0	0	0	0	0	0	0	0	0	0	0	0	0	0	0	0	0	0	0	0	0	0	1	0
UCON17	0	0	0	0	0	0	0	0	0	0	0	0	0	0	0	0	0	0	0	0	0	0	0	0	0	0	0	0	0	0	0	0	0	0	0	0	0	0	0	0	0	0	0	0	0	0	1	0	0
UCON18	0	0	0	0	0	0	0	0	0	0	1	0	0	0	0	0	0	1	0	0	0	0	0	0	0	0	0	0	0	0	0	0	0	0	0	0	0	0	0	0	0	0	0	0	0	0	0	0	0
UCON19	0	0	0	0	0	0	0	0	0	0	0	0	0	0	0	0	0	1	3	0	0	0	0	0	0	0	0	0	0	0	0	0	0	0	0	0	0	0	0	0	0	0	0	0	0	0	1	7	9
UCON2	212	288	169	174	121	68	173	156	102	184	443	360	325	191	228	180	254	284	194	414	121	236	197	265	283	199	211	230	250	525	476	283	229	165	172	136	232	182	116	195	187	289	215	366	303	345	354	296	71
UCON20	0	0	2	0	0	0	0	0	0	0	0	0	0	0	0	0	1	0	0	0	0	0	0	3	0	1	0	0	0	0	0	0	0	3	0	0	0	0	0	0	0	4	0	0	2	0	0	4	0
UCON21	0	0	0	0	0	0	0	0	0	1	0	0	0	0	0	0	0	0	0	0	0	0	0	0	0	0	0	0	0	0	0	0	0	0	0	0	1	0	0	0	1	0	0	0	0	0	0	0	0
UCON22	0	0	0	0	1	0	0	0	0	0	0	0	0	0	0	0	0	0	0	0	0	0	0	0	0	0	0	0	0	0	0	0	0	0	0	0	0	0	0	0	0	0	0	0	0	0	0	1	0
UCON23	12	32	19	13	23	16	27	32	12	32	39	43	37	8	33	30	27	18	19	38	29	24	28	53	34	24	26	19	35	24	31	18	26	14	19	16	34	19	20	24	38	32	22	53	28	28	23	42	9
UCON24	0	0	0	0	0	0	0	0	0	0	0	0	0	0	0	0	0	0	0	0	0	0	0	0	0	0	0	0	0	0	0	0	0	0	0	0	0	0	0	0	0	0	0	0	0	0	0	1	0
UCON25	0	0	0	0	2	0	0	0	0	0	0	0	0	0	0	2	1	0	0	0	0	0	0	0	0	0	0	1	0	0	0	0	0	0	0	0	0	0	0	0	0	1	1	0	0	0	0	0	0
UCON26	16	2	6	6	12	7	12	12	3	11	14	27	38	11	9	24	25	10	22	34	9	20	4	20	3	11	5	8	1	11	1	8	11	1	5	4	3	3	11	2	6	15	16	9	5	2	25	13	2
UCON27	0	1	0	2	0	1	0	0	1	3	4	6	0	4	0	1	6	3	2	5	0	4	0	4	0	0	0	0	0	1	0	0	0	0	1	0	0	0	0	2	2	3	1	3	0	1	0	3	0
UCON28a	3	0	4	5	3	2	10	5	5	5	4	3	2	3	6	3	3	8	2	3	2	1	1	7	6	5	6	6	2	4	0	2	0	3	3	4	0	4	2	1	7	4	0	5	7	3	7	7	0
UCON28b	0	0	0	0	2	2	0	0	0	1	0	0	0	0	1	0	1	0	5	0	3	9	2	1	0	0	3	0	1	1	0	0	0	0	0	0	0	0	0	4	0	0	0	0	7	0	2	8	14
UCON28c	0	0	1	0	0	0	1	0	0	0	0	1	1	0	0	1	0	0	0	1	0	0	0	0	0	0	0	0	0	0	1	0	0	0	0	0	0	0	0	0	0	1	0	1	0	1	0	0	0
UCON29	40	35	39	39	26	11	17	28	18	34	64	60	72	36	46	36	46	54	40	65	27	43	29	58	15	22	15	11	22	26	24	29	23	6	10	6	6	21	4	18	19	19	30	28	28	31	48	36	4
UCON31	0	3	0	0	0	0	0	0	0	0	0	1	0	0	0	0	4	1	0	0	1	0	0	4	0	0	0	0	0	2	0	0	0	0	0	0	0	1	0	1	0	4	0	1	0	0	0	1	4
UCON4	86	82	37	78	101	43	106	83	59	134	160	143	113	64	95	72	128	62	71	148	61	104	98	172	130	100	94	123	136	118	121	81	68	48	49	30	68	72	30	57	116	111	95	170	112	92	82	86	23
UCON5	0	0	0	0	0	0	1	0	0	0	0	0	0	0	0	0	1	0	0	0	0	0	0	0	0	0	0	0	0	0	0	0	0	0	0	0	1	0	0	0	0	0	1	0	0	1	0	0	0
UCON6	0	2	0	2	2	0	0	0	2	0	1	0	2	0	0	0	0	2	2	2	0	0	0	0	0	1	0	0	2	0	2	0	2	0	0	1	0	1	0	0	4	0	0	0	3	1	1	1	6
UCON7	6	14	21	19	27	12	31	24	17	44	36	34	55	30	24	38	33	61	54	63	56	45	37	51	15	8	4	19	4	31	10	25	10	9	14	9	31	15	13	29	15	18	29	19	24	23	33	66	0
UCON8	3	3	13	4	2	7	1	0	1	0	4	2	2	2	5	4	2	9	5	2	9	2	6	1	3	0	3	2	0	5	4	0	0	0	0	1	4	2	0	1	2	1	0	3	0	1	3	2	0
UCON9	0	0	0	0	0	0	0	0	0	0	0	0	0	0	0	1	0	1	0	0	0	0	4	0	0	0	0	0	2	0	0	0	0	0	0	0	0	0	0	0	0	2	0	0	0	0	0	0	0
URR1A	1469	1517	1532	1311	1207	710	879	1243	987	1327	1653	1974	2742	1662	1923	1575	2320	2073	2068	1805	1548	1677	1324	2336	878	1188	896	675	906	1078	817	875	793	549	954	621	1085	560	621	1079	955	1678	1136	1036	1383	1595	1657	1773	1154
URR1B	2010	2540	1764	2191	2361	1350	1939	2233	1720	2763	2748	3509	3316	1940	2470	2138	2984	2695	2168	3341	2404	2185	1893	4376	2494	2740	2334	1997	2483	2275	2409	2236	2052	1203	2321	1556	2207	1554	1109	2074	2126	3330	2453	2612	2655	2622	2752	2978	1294
X1_LINE	0	0	0	0	0	0	0	0	0	0	0	0	0	0	3	0	0	1	0	0	0	0	0	0	0	0	2	0	0	0	0	0	0	0	0	0	0	0	0	0	0	0	0	1	0	0	0	1	0
X2_LINE	0	0	0	0	0	0	0	0	0	0	0	0	0	0	0	0	0	1	0	0	0	0	0	0	0	0	0	0	0	0	0	0	0	0	0	0	0	0	0	0	0	1	0	1	0	0	0	0	0
X3_LINE	97	128	76	104	61	46	92	69	82	84	115	141	144	74	130	99	134	116	94	101	104	94	113	170	143	108	133	111	123	80	87	79	77	59	76	77	92	64	52	80	163	154	99	137	85	121	129	138	65
X5A_LINE	0	0	0	0	0	0	0	1	0	0	0	1	0	0	0	0	1	1	0	1	0	2	0	0	0	0	0	0	0	0	0	0	0	0	1	0	1	0	0	0	0	1	0	0	0	0	0	1	1
X5B_LINE	0	0	0	3	0	4	0	0	0	0	0	0	0	0	0	1	1	1	0	3	0	2	0	0	1	0	0	0	0	1	0	0	0	0	0	0	0	0	0	0	1	6	1	0	1	1	1	4	3
X6A_LINE	8	7	12	8	19	13	18	12	10	11	19	22	11	13	8	18	12	12	27	24	13	6	5	31	15	18	9	16	8	14	16	11	18	8	13	13	11	6	5	17	17	18	6	13	9	12	25	23	80
X6B_LINE	609	596	294	459	351	299	430	504	349	457	612	699	581	245	461	428	502	331	412	478	441	437	350	813	742	841	726	639	729	556	512	599	423	368	474	405	534	398	229	435	561	940	544	719	460	613	492	667	617
X7A_LINE	43	22	38	18	62	32	39	29	20	64	58	134	66	38	64	52	68	71	88	60	42	85	56	76	18	12	3	24	13	37	41	43	39	12	34	24	38	35	19	18	27	27	39	34	23	18	16	57	0
X7B_LINE	3	0	4	3	0	0	0	2	2	0	2	5	10	2	7	2	7	6	2	3	1	5	6	2	2	5	2	0	1	4	3	1	0	3	2	0	3	1	1	1	1	2	2	2	4	3	2	0	12
X7C_LINE	3	0	0	0	1	6	0	0	0	1	3	1	0	1	4	1	1	4	1	0	1	1	0	0	4	11	3	3	1	3	0	3	0	0	1	0	5	1	0	2	2	10	1	2	0	0	1	3	190
X7D_LINE	0	0	0	0	0	0	0	0	0	1	0	0	0	0	0	0	0	2	0	0	0	0	0	0	0	0	0	0	0	0	0	0	0	0	0	0	0	0	0	0	0	0	0	0	0	0	0	0	0
X8_LINE	9	9	9	3	8	4	5	8	4	10	5	6	7	2	18	6	12	12	32	14	19	4	8	13	8	16	5	2	8	13	9	4	2	8	9	13	3	6	5	10	6	12	14	6	11	9	21	22	6
X9_LINE	3	12	9	7	6	5	5	2	6	7	7	2	11	8	8	15	10	15	21	9	7	8	5	13	5	15	6	1	2	9	6	18	7	6	15	7	2	0	6	22	5	23	11	16	2	27	10	19	4
YREP_Mm	120	119	107	91	118	54	72	106	85	82	132	145	209	123	182	152	168	112	151	123	82	211	124	251	101	133	107	84	84	109	81	76	103	47	60	83	123	131	65	77	69	126	90	94	82	147	92	262	95
ZP3AR	557	481	286	531	475	228	505	360	277	546	560	645	698	385	644	504	748	534	478	698	433	427	542	983	542	382	411	358	527	392	517	391	363	165	277	204	510	433	171	285	345	491	436	534	339	383	372	589	159
Zaphod	13	22	28	21	17	11	11	18	14	21	19	21	78	4	20	16	46	38	37	26	31	25	12	19	6	20	9	11	5	12	10	17	26	11	8	9	9	8	11	22	20	33	24	21	25	26	36	35	9
Zaphod2	2	44	18	15	8	8	6	5	14	6	30	48	104	17	18	18	47	19	26	13	17	3	9	24	8	24	10	11	10	23	14	25	11	0	27	6	9	5	12	19	3	16	15	12	15	8	30	57	83
Zaphod3	1	3	0	2	4	1	3	1	5	1	3	0	6	7	2	3	9	25	1	8	5	0	9	8	4	7	0	2	1	1	1	6	1	0	3	4	0	1	1	0	2	18	1	2	3	4	10	8	14
hAT-N1_Mam	5	6	3	1	2	2	3	4	3	11	6	2	4	1	0	4	5	8	4	5	4	1	2	2	10	5	4	2	4	1	4	0	5	5	4	1	2	3	0	3	3	10	4	4	10	2	2	9	10
polypurine	129	168	146	165	111	81	131	215	127	180	158	312	219	104	182	146	141	153	144	151	196	161	138	236	223	206	201	175	173	110	186	132	133	88	122	103	209	121	113	189	224	319	227	203	222	269	159	219	138
polypyrimidine	237	384	230	335	419	205	291	295	248	373	522	508	308	301	458	264	293	401	337	492	338	368	383	656	364	415	325	414	539	306	416	263	290	218	268	216	356	362	135	200	320	487	290	398	277	409	266	610	700
tRNA-Ala-GCA	159	170	112	105	125	96	108	184	96	157	181	227	173	99	133	120	150	108	104	146	149	137	99	216	137	196	143	105	118	112	129	132	97	92	204	101	91	67	81	134	92	183	174	113	191	178	204	151	39
tRNA-Ala-GCG	1	1	12	5	4	1	2	0	0	3	4	4	1	1	0	6	14	3	0	0	7	5	1	7	4	1	2	3	3	1	2	1	2	1	7	2	1	2	0	6	3	3	2	3	2	4	2	5	1
tRNA-Ala-GCY	0	0	0	0	0	0	0	0	0	0	0	0	0	0	0	0	0	0	0	0	0	0	0	0	0	0	0	0	0	0	0	0	0	0	0	0	0	0	0	0	1	0	0	0	0	0	0	2	0
tRNA-Ala-GCY_	69	166	106	105	103	91	99	109	87	134	154	151	158	88	134	116	150	126	126	173	137	160	112	177	125	160	108	86	119	118	100	107	115	56	113	71	110	65	60	107	96	209	119	130	101	141	200	181	87
tRNA-Arg-AGA	0	0	0	1	0	1	0	0	0	0	0	0	0	0	0	0	1	0	0	0	0	0	0	0	0	0	0	0	0	0	0	0	0	0	0	0	0	0	0	1	1	0	2	0	0	0	0	0	0
tRNA-Arg-AGG	0	0	0	0	0	0	0	0	0	0	0	0	0	0	0	0	0	0	0	0	0	0	0	0	0	0	0	0	0	0	0	0	0	0	0	0	0	0	0	0	6	0	0	0	0	0	0	0	0
tRNA-Arg-CGA	0	0	0	0	0	0	0	0	0	0	0	0	0	0	0	0	1	0	0	0	0	0	0	0	0	0	0	0	0	0	0	0	0	0	0	0	0	0	0	0	0	0	0	0	0	0	0	0	0
tRNA-Arg-CGA_	0	0	0	0	0	0	0	0	0	0	0	0	0	0	0	0	0	0	0	0	0	0	0	0	0	0	0	0	0	0	0	0	0	0	0	0	0	0	0	0	0	0	0	0	0	0	0	0	0
tRNA-Arg-CGG	0	0	0	0	0	0	0	0	0	0	0	0	0	0	0	0	1	1	0	0	0	0	0	0	0	0	0	1	0	0	0	0	0	0	0	0	0	0	0	0	0	0	0	0	0	0	0	1	0
tRNA-Arg-CGY_	0	0	0	0	0	0	0	0	0	0	0	0	0	0	0	0	2	1	0	0	0	0	0	0	0	0	0	0	0	0	0	0	0	0	0	0	0	0	0	0	0	0	1	0	1	0	0	0	0
tRNA-Asp-GAY	0	0	0	0	0	0	0	0	0	0	0	0	0	0	0	0	0	0	0	0	0	0	0	0	0	0	0	0	0	0	0	0	0	0	0	0	0	0	0	0	0	0	0	0	0	0	0	2	0
tRNA-Cys-TGY	0	0	0	0	0	3	0	0	0	0	0	0	0	0	0	0	6	2	0	2	0	0	0	0	0	0	0	0	0	0	0	0	0	0	0	0	0	0	0	0	2	0	0	0	0	0	0	4	0
tRNA-Gln-CAA_	101	43	54	94	12	923	16	38	25	86	40	37	156	44	66	98	490	130	58	87	22	31	66	158	65	69	39	26	65	100	31	74	29	40	58	41	22	26	27	47	62	49	56	45	72	92	44	60	41
tRNA-Gln-CAG	0	0	0	0	0	0	0	0	0	0	0	0	0	0	0	0	1	1	0	0	0	0	0	0	0	0	0	0	0	0	0	0	0	0	0	0	0	0	0	0	0	0	0	0	0	0	0	0	0
tRNA-Glu-GAG	0	0	0	0	0	0	0	0	0	0	0	0	0	0	0	0	1	0	0	0	0	0	0	0	0	0	0	0	0	0	0	0	0	0	0	0	0	0	0	0	0	0	0	0	0	0	0	0	0
tRNA-Glu-GAG_	0	0	0	0	0	1	0	0	0	0	0	0	0	0	1	0	0	0	0	0	0	0	0	0	0	0	0	0	0	0	0	0	0	0	0	0	0	0	0	0	0	0	0	0	0	0	0	0	0
tRNA-Gly-GGA	4	15	11	8	6	4	11	9	14	10	18	22	3	5	17	13	20	4	4	17	18	13	7	17	9	2	11	8	8	7	7	13	8	6	6	14	9	10	11	9	7	17	15	14	13	24	17	11	0
tRNA-Gly-GGG	0	0	0	0	0	0	0	0	2	0	0	0	0	0	0	1	0	0	2	0	0	0	0	0	0	0	0	0	0	0	0	0	0	0	0	0	0	0	0	0	0	0	0	0	0	0	0	0	0
tRNA-Gly-GGY	0	0	0	0	0	0	0	1	0	3	0	0	0	0	0	2	1	1	0	1	0	0	0	0	0	0	0	0	0	0	0	2	0	0	1	0	0	0	1	0	0	0	0	0	0	0	0	1	0
tRNA-His-CAY_	0	0	0	0	0	0	0	0	0	0	0	0	0	0	0	0	4	3	0	0	0	0	0	0	0	0	0	0	0	0	0	0	0	0	0	0	0	0	0	0	1	1	0	0	0	0	0	0	0
tRNA-Ile-ATA	0	0	0	0	0	0	0	0	0	0	0	0	0	0	0	0	0	0	0	0	0	0	0	0	0	0	0	0	0	0	0	0	0	0	0	0	0	0	0	0	0	0	1	0	0	0	0	0	0
tRNA-Ile-ATT	0	0	0	0	0	0	0	0	0	0	0	0	0	0	0	0	0	1	0	0	0	0	0	0	0	0	0	0	0	0	0	0	0	0	0	0	0	0	0	0	1	0	1	0	0	0	0	0	0
tRNA-Leu-CTA	0	0	0	0	0	0	0	1	0	0	0	0	0	0	0	0	0	1	0	0	0	0	0	0	0	0	0	0	0	0	0	0	0	0	0	0	0	0	0	0	0	0	0	0	0	0	0	0	0
tRNA-Leu-CTA_	0	0	0	0	0	0	0	0	0	0	0	0	0	0	0	0	1	0	0	0	0	0	0	0	0	0	0	0	0	0	0	0	0	0	0	0	0	0	0	0	0	0	0	0	0	0	0	0	0
tRNA-Leu-CTY	0	0	0	1	0	0	0	0	0	0	0	2	0	0	0	0	1	0	0	0	0	0	0	0	0	0	0	0	0	0	0	0	0	0	0	0	0	0	0	0	1	0	0	0	0	0	0	0	0
tRNA-Leu-TTA	0	0	0	0	0	0	0	0	0	0	0	0	0	0	0	0	0	0	0	0	0	0	0	0	0	0	0	0	0	0	0	0	0	0	0	0	0	0	0	0	0	0	0	0	0	0	0	0	0
tRNA-Leu-TTA(m)	760	469	382	602	108	1209	97	376	162	390	200	203	1367	276	459	844	1584	350	487	459	107	227	589	948	250	300	213	105	238	200	123	230	132	94	212	162	293	119	212	242	243	218	267	233	313	473	327	337	444
tRNA-Leu-TTG	0	0	0	0	0	0	0	0	0	0	0	0	0	0	0	0	0	0	0	0	0	0	0	0	0	0	0	0	0	0	0	0	0	0	0	0	0	0	0	0	0	0	0	0	1	0	0	4	0
tRNA-Lys-AAA	0	0	0	0	0	1	0	0	0	0	0	0	0	0	0	0	1	2	0	0	0	0	0	0	0	0	0	0	0	0	0	0	0	0	0	0	0	0	0	0	0	0	1	0	0	0	0	1	0
tRNA-Lys-AAG	9	12	9	24	9	4	7	19	11	11	14	10	33	6	8	9	15	15	7	20	7	4	2	14	10	11	14	11	31	14	6	13	7	12	17	5	2	4	2	9	13	23	7	6	14	4	15	16	9
tRNA-Met-i	0	0	0	0	0	0	0	0	0	0	0	0	0	0	0	0	2	1	0	0	0	0	0	0	0	0	0	0	0	0	0	0	0	0	0	0	0	0	0	0	0	1	0	0	0	0	0	1	0
tRNA-Phe-TTY	0	0	0	0	0	1	0	0	0	0	0	0	0	0	0	0	3	1	0	0	0	0	0	0	0	0	0	0	0	0	0	0	0	0	0	0	0	0	0	0	0	0	0	0	0	0	0	0	0
tRNA-Pro-CCA	0	0	0	0	0	0	0	0	0	0	0	0	0	1	0	0	0	0	0	0	0	0	0	0	0	0	0	0	0	0	0	0	0	0	0	0	0	0	0	0	0	0	0	0	0	0	0	0	0
tRNA-Pro-CCG	0	0	0	0	0	0	0	0	0	0	0	0	0	0	0	0	0	0	0	0	0	0	0	0	0	0	0	0	0	0	0	0	0	0	0	0	0	0	0	0	0	0	0	0	0	0	0	0	0
tRNA-Pro-CCY	3	3	1	2	0	0	2	0	0	1	1	0	2	0	0	1	3	0	0	1	1	0	0	3	2	1	3	0	1	0	1	0	1	1	0	1	2	3	1	0	0	0	0	0	1	0	3	0	0
tRNA-Ser-AGY	0	0	0	0	0	0	0	0	0	0	0	0	0	0	0	0	1	2	0	0	0	0	0	1	0	0	0	0	0	0	0	0	0	0	0	0	0	0	0	0	3	2	0	0	0	0	0	0	0
tRNA-Ser-TCA(m)	3	3	0	1	0	0	0	3	2	2	0	0	1	0	0	2	1	0	1	0	1	0	2	2	2	0	0	3	1	1	1	1	0	0	0	2	0	2	1	1	0	0	0	2	3	1	0	0	2
tRNA-Ser-TCG	0	0	0	0	0	0	0	0	0	0	0	0	0	0	0	0	0	1	0	0	0	0	0	0	0	0	0	0	0	0	0	0	0	0	0	0	0	0	0	0	0	0	0	0	0	0	0	0	0
tRNA-Ser-TCY	0	0	0	0	0	0	0	0	0	0	0	0	0	0	0	1	1	0	0	0	0	0	0	0	0	0	0	0	0	0	0	0	0	0	0	0	0	0	0	0	3	0	0	0	1	0	0	0	0
tRNA-Thr-ACA	0	0	0	0	0	0	0	0	0	0	0	0	0	0	0	0	1	0	0	0	0	0	3	0	0	0	0	0	0	0	0	0	0	0	0	0	0	0	0	0	0	0	0	0	0	0	0	0	0
tRNA-Thr-ACG	0	0	0	0	0	0	0	0	0	0	0	0	0	0	0	0	1	1	0	0	0	0	0	0	0	0	0	0	0	0	0	0	0	0	0	0	0	0	0	0	0	0	0	0	0	0	0	0	0
tRNA-Thr-ACG_	0	0	0	0	0	0	0	0	0	0	0	0	0	0	0	0	0	0	0	0	0	0	0	0	0	0	0	0	0	0	0	0	0	0	0	0	0	0	0	0	0	0	0	0	0	0	0	0	0
tRNA-Thr-ACY	0	3	0	0	0	0	0	0	0	0	0	0	0	0	0	0	0	0	1	0	0	0	0	0	0	0	0	0	0	0	0	0	0	0	0	0	0	0	0	0	0	0	0	0	0	0	0	0	0
tRNA-Thr-ACY_	1	0	0	0	0	0	0	0	0	0	0	0	0	0	0	0	1	1	0	0	0	0	0	0	0	0	0	0	0	0	0	0	0	0	0	0	0	0	0	0	0	0	0	0	0	0	0	0	0
tRNA-Trp-TGG	0	0	0	0	0	1	0	0	0	0	0	0	0	1	1	0	2	4	0	1	1	0	0	0	0	2	0	0	0	1	0	0	0	0	0	0	0	0	0	0	0	2	2	0	0	0	0	2	0
tRNA-Tyr-TAC	1	5	0	0	0	0	0	0	1	0	0	0	0	0	0	0	1	2	0	0	0	0	0	0	0	0	0	0	0	0	0	0	0	0	0	0	0	0	0	0	1	7	1	0	0	0	0	0	0
tRNA-Tyr-TAT	0	0	0	0	0	0	0	0	0	0	0	0	0	0	0	0	0	0	0	0	0	0	0	0	0	0	0	0	0	0	0	0	0	0	0	0	0	0	0	0	0	0	1	0	0	0	0	0	0
tRNA-Val-GTA	0	0	0	0	0	0	0	0	0	0	0	0	0	0	0	0	1	0	0	0	0	0	0	0	0	0	0	0	0	0	0	0	0	0	0	0	0	0	0	0	0	0	0	0	0	0	0	0	0
tRNA-Val-GTG	0	0	0	0	0	0	0	0	0	1	0	0	0	0	0	0	4	0	0	0	0	0	1	1	0	0	0	0	0	0	0	0	0	0	0	0	0	0	0	0	1	0	0	0	0	0	0	1	0
tRNA-Val-GTY	0	0	0	0	0	0	0	0	0	0	0	0	0	1	0	0	1	1	0	0	0	0	0	0	0	0	0	0	0	0	0	0	0	0	0	0	0	0	0	0	0	0	0	0	0	0	0	1	0
[truncated: 17 more columns]
