# Supplementary material for: Stella modulates transcriptional and endogenous retrovirus programs during maternal-to-zygotic transition
Source: eLife journal article supplement (doi:10.7554/elife.22345), 2017-03-21
Supplement: supp [file elife-22345-supp-v1.zip › elife_poa_e22345_Figure_3_source_data_2.xlsx]

## Sheet: RepeatElementUniqueMultiCount f
Figure 3 – source data 2. Uniquely and multi-mapped transposable element (TE) counts. TE counts for 66 samples from single cell / embryo RNA-seq experiments. Uniquely and multi-mapped reads.
	WT_oocyte_1	WT_oocyte_2	WT_oocyte_3	WT_oocyte_4	WT_oocyte_5	WT_oocyte_6	WT_oocyte_7	WT_oocyte_8	WT_oocyte_9	WT_oocyte_10	WT_oocyte_11	WT_oocyte_12	KO_oocyte_1	KO_oocyte_2	KO_oocyte_3	KO_oocyte_4	KO_oocyte_5	KO_oocyte_6	KO_oocyte_7	KO_oocyte_8	KO_oocyte_9	KO_oocyte_10	KO_oocyte_11	KO_oocyte_12	WT_1_cell_1	WT_1_cell_2	WT_1_cell_3	WT_1_cell_4	WT_1_cell_5	WT_1_cell_6	WT_1_cell_7	WT_1_cell_8	WT_1_cell_9	WT_1_cell_10	WT_1_cell_11	WT_1_cell_12	KO_1_cell_1	KO_1_cell_2	KO_1_cell_3	KO_1_cell_4	KO_1_cell_5	KO_1_cell_6	KO_1_cell_7	KO_1_cell_8	KO_1_cell_9	KO_1_cell_10	KO_1_cell_11	KO_1_cell_12	WT_2_cell_1
(A)n	3967	5497	4160	2733	2438	2254	2616	4452	2136	3910	4925	5449	6366	2745	5167	3507	5162	3691	5009	5549	3684	4411	3948	6592	3614	3905	2969	2283	3722	3357	4243	5414	2978	3772	4595	3595	3142	2004	1595	3174	2471	5604	5390	6624	5310	6136	7505	5888	2483
(AAATG)n	0	0	0	0	0	0	0	0	0	0	0	0	0	0	0	0	0	0	0	1	0	1	0	0	0	0	0	0	0	0	0	0	0	0	0	0	0	0	0	0	1	0	0	0	0	0	0	0	0
(AACTG)n	1	0	0	0	1	0	0	0	1	0	0	0	0	0	4	0	0	0	0	0	0	0	2	0	0	0	0	0	0	0	0	0	0	0	0	0	1	0	0	2	0	1	0	2	1	5	0	0	1
(AATAG)n	1	1	0	0	0	0	0	0	0	0	0	0	0	0	0	0	0	0	1	1	3	0	1	0	0	0	1	0	0	0	0	1	0	0	1	0	1	1	0	1	0	1	1	1	0	2	2	2	0
(AATTG)n	0	0	0	0	0	0	0	0	0	0	0	0	0	0	0	0	0	0	0	0	0	0	0	0	0	0	0	0	0	0	0	0	0	0	0	0	0	0	0	0	0	0	0	0	0	0	0	0	0
(ACATG)n	0	0	0	0	0	1	0	0	0	0	0	0	0	0	0	3	0	2	0	0	0	0	0	0	0	0	0	0	0	0	0	0	0	0	0	0	0	0	0	0	0	0	0	0	0	0	0	0	0
(ACCG)n	0	6	4	1	3	1	1	5	1	3	2	1	4	12	0	2	3	2	2	0	1	0	1	4	1	1	2	2	0	0	1	3	0	0	2	3	1	0	0	1	1	7	1	0	3	1	1	1	12
(ACCTG)n	0	0	0	0	0	0	0	0	0	0	0	0	0	0	0	1	0	0	0	0	0	0	0	0	0	0	0	0	0	0	0	0	0	0	0	0	0	0	0	0	0	0	0	0	0	0	0	1	0
(ACGTG)n	0	0	0	0	0	0	0	0	0	0	0	0	0	0	0	0	0	0	0	0	0	0	0	0	0	0	0	0	0	0	0	0	0	0	0	0	0	0	0	0	0	0	0	0	0	0	0	0	0
(ACTG)n	2	2	6	5	1	1	1	0	5	2	3	3	6	3	10	7	4	8	5	4	4	2	3	6	1	1	8	2	5	5	3	4	2	1	5	3	3	4	1	1	3	10	5	3	4	11	2	7	4
(AGATG)n	0	0	0	0	0	0	0	0	0	0	0	0	0	0	0	0	1	1	0	0	0	0	0	0	0	0	1	0	0	0	0	0	0	0	0	0	0	0	0	0	0	0	0	1	0	0	0	0	0
(AGCTG)n	39	132	55	30	28	43	27	35	43	62	47	29	100	13	60	35	42	48	57	49	38	27	23	37	30	103	72	27	44	36	17	56	37	36	75	47	32	18	23	40	7	52	28	59	28	86	134	101	31
(AGGGGG)n	25	38	42	45	34	27	16	35	19	41	50	83	68	36	42	47	54	45	42	34	36	41	31	73	22	25	16	15	24	45	29	22	28	12	22	13	27	17	14	20	18	34	27	27	36	47	37	44	9
(AGGTG)n	0	0	0	0	0	0	0	1	0	0	0	0	0	0	0	0	0	0	0	0	0	0	0	0	0	0	0	0	0	0	0	0	0	0	0	0	0	0	0	0	0	0	0	0	0	0	0	0	4
(AGTAG)n	0	0	0	0	2	0	0	0	0	0	0	0	0	1	0	0	0	1	1	0	0	0	0	0	0	0	0	0	0	0	0	0	0	0	0	0	0	0	0	3	0	0	0	0	0	0	1	0	0
(AGTTG)n	0	0	0	0	0	0	0	0	0	0	0	0	0	0	0	0	0	0	0	0	0	0	0	0	0	0	0	0	0	0	0	0	0	0	0	0	0	0	0	0	0	0	0	0	0	0	0	0	0
(ATAAG)n	0	0	0	0	0	0	0	0	4	0	1	0	0	0	0	0	0	0	0	0	0	0	1	0	0	0	0	0	0	2	0	0	0	1	0	4	0	0	0	0	0	0	0	0	0	0	0	0	0
(ATAGG)n	0	0	0	0	0	0	0	0	0	0	0	0	0	0	0	0	0	0	0	0	0	0	0	0	0	0	0	0	0	0	0	0	0	0	0	0	0	0	0	0	0	0	0	0	0	0	0	1	0
(ATATG)n	0	6	0	0	0	3	0	1	1	2	0	1	5	1	2	0	2	2	1	2	0	0	1	2	3	2	1	0	1	1	0	1	1	0	2	1	1	1	0	0	1	3	3	1	3	0	3	0	4
(ATCTG)n	0	0	0	0	0	0	0	0	0	0	0	0	0	0	0	0	0	1	0	0	0	0	0	0	0	0	0	0	0	0	0	0	0	0	0	0	0	0	0	0	0	0	0	0	0	0	0	0	0
(ATG)n	1576	1898	1524	1783	1600	1070	1207	1684	1304	1793	1828	1988	2593	1326	2051	1769	2299	1702	1987	2241	2038	1777	1754	2967	2059	2263	1815	1547	1712	1766	1471	1491	1605	962	1684	1328	2064	1106	928	1586	1674	2895	2066	2229	2051	2402	1860	2481	1248
(ATGGTG)n	317	374	303	320	199	212	266	309	206	277	289	338	422	202	361	330	341	338	391	357	349	308	280	548	444	514	399	273	448	291	276	319	279	194	333	257	371	228	211	350	396	639	446	422	339	474	399	374	193
(ATGTG)n	0	5	1	4	0	0	0	0	0	1	0	2	0	0	0	1	2	2	2	0	0	0	0	1	0	1	6	0	0	1	0	0	1	0	0	0	1	0	0	0	0	2	2	2	0	0	0	0	0
(ATTAG)n	0	0	0	0	0	0	0	0	0	0	0	0	0	0	0	0	1	0	0	0	0	0	0	0	0	0	0	0	0	0	0	0	0	0	0	0	0	0	0	0	0	0	0	0	0	0	0	0	0
(ATTG)n	19	29	24	34	53	12	16	26	23	38	35	38	69	32	51	44	54	47	51	53	43	20	34	56	26	49	37	30	36	23	32	33	28	20	36	36	25	18	10	28	28	41	37	43	28	50	71	51	12
(ATTTG)n	0	0	0	1	1	1	0	1	0	1	5	0	1	0	1	1	2	2	3	3	0	1	4	5	0	1	1	0	2	3	2	0	0	0	0	0	0	0	0	1	0	0	1	1	2	2	3	1	4
(C)n	4	11	12	4	10	2	5	5	8	4	6	8	8	5	7	9	7	8	3	11	5	2	2	13	3	9	8	5	4	8	2	5	4	4	13	2	13	5	5	5	5	13	13	10	5	14	11	10	1
(CA)n	7087	8448	7026	8432	7437	3750	5792	6396	5084	7318	8348	10330	12046	6553	9284	7872	10278	9163	8490	9969	7394	7384	6715	12336	7135	8197	6472	5885	7805	6630	6823	6211	5978	3583	6450	4906	6341	4679	3172	5695	5854	9472	7190	8156	7435	8121	8083	8709	4434
(CAA)n	427	502	618	432	469	286	374	400	336	547	639	813	1100	630	1005	815	971	943	945	778	752	735	584	986	360	500	369	306	365	412	379	396	348	244	415	307	506	344	262	372	530	860	587	528	570	606	743	897	562
(CAAA)n	963	1133	1037	1000	852	580	770	805	653	1074	1259	1385	2004	942	1716	1276	1812	1544	1807	1501	1190	1206	1074	1757	800	1064	841	734	868	954	762	847	714	509	952	603	829	554	498	798	858	1489	1157	1186	1066	1315	1368	1423	689
(CAAAA)n	1932	2019	1742	1899	1663	910	1326	1500	1134	1776	2224	2928	3279	1794	2512	1918	2764	2219	2577	2678	1873	2058	1812	3034	1591	1788	1419	1359	1892	1736	1627	1452	1392	871	1566	1055	1519	1162	829	1330	1555	2459	1734	1985	1819	1964	2042	2431	979
(CAAAAA)n	1427	1575	1268	1430	1340	582	925	1145	797	1294	1751	2178	2386	1440	2130	1447	2042	1653	1776	1821	1258	1279	1173	2152	1131	1124	932	1027	1324	1168	1140	1066	1049	653	1077	877	1007	714	489	900	1044	1583	1178	1386	1308	1432	1316	1544	868
(CAAAC)n	2830	2906	1929	3285	2819	1066	1785	2176	1602	2866	3993	4311	4497	2316	4354	2937	4305	3172	3323	3928	2043	2251	2303	3867	2489	2672	1972	2228	3692	2259	2743	2186	2519	1271	2035	1955	1923	1497	800	1418	1570	2374	2234	2447	2175	2191	2193	3082	402
(CAAAG)n	3	3	1	1	4	6	2	4	2	4	4	8	6	3	5	7	12	9	5	12	6	8	3	13	2	8	1	1	4	3	1	4	5	2	4	1	0	1	4	4	3	10	5	5	6	4	4	1	7
(CAAAT)n	2	2	3	3	4	5	3	2	5	3	7	2	10	1	3	5	3	6	13	1	2	3	6	9	4	9	8	2	6	4	5	5	6	1	3	2	3	3	1	10	14	26	18	6	8	5	9	10	7
(CAACC)n	13	11	5	35	11	4	18	14	17	15	23	16	22	18	16	11	20	10	12	17	15	12	13	17	32	43	37	19	23	25	19	24	25	3	24	16	16	12	10	15	16	49	35	32	21	20	18	27	52
(CAACG)n	6	6	4	3	4	5	6	3	4	3	4	8	0	3	5	5	4	3	7	4	9	12	5	8	6	10	6	3	3	15	6	9	3	2	2	7	14	4	1	7	17	29	15	15	14	9	7	7	0
(CAACT)n	0	0	3	2	0	0	0	0	0	0	0	1	0	0	0	0	0	0	0	0	0	0	0	1	0	0	0	0	1	1	0	0	1	0	0	0	0	0	0	0	0	1	0	0	2	0	0	0	0
(CAAG)n	4	13	6	4	5	8	4	9	9	10	3	9	9	8	5	8	22	9	2	12	12	13	3	13	9	5	8	2	6	4	3	6	6	5	4	4	5	2	3	5	4	15	12	6	9	13	8	10	18
(CAAGA)n	0	0	0	0	0	0	0	0	0	0	0	0	0	0	0	0	1	0	0	0	0	1	0	0	0	0	0	0	0	0	0	0	0	0	0	0	0	0	0	0	1	0	0	0	0	0	0	0	0
(CAAGC)n	0	0	0	0	0	0	0	0	0	0	0	0	0	0	0	0	1	0	0	0	0	0	0	0	0	1	0	0	0	0	0	0	0	0	0	0	0	0	0	0	0	0	0	0	0	0	0	0	0
(CAAGG)n	1	0	1	0	0	0	0	0	0	1	1	1	1	1	0	1	4	4	0	2	4	13	1	4	0	0	0	2	0	0	0	0	0	0	0	0	0	0	1	5	4	6	1	3	4	1	1	4	0
(CAAT)n	483	659	590	576	566	317	441	485	408	482	560	795	715	477	632	565	552	701	396	613	565	612	497	898	501	436	394	434	487	338	491	238	326	194	244	297	450	303	302	341	494	737	526	550	577	668	434	433	82
(CAATA)n	29	2	4	9	4	4	12	22	8	19	16	12	6	14	14	4	15	15	20	22	6	16	16	19	3	6	3	2	10	18	7	4	4	2	5	4	8	11	0	3	1	12	5	4	4	15	14	12	2
(CAATC)n	0	0	0	0	0	0	0	0	1	0	0	0	0	0	0	0	1	0	0	0	0	0	0	0	0	0	0	0	0	0	0	0	1	0	0	0	0	0	0	0	0	0	1	0	0	0	0	0	0
(CAATG)n	0	0	0	0	0	0	0	0	0	0	0	0	0	0	0	0	0	0	0	0	0	0	0	0	0	0	0	0	0	0	0	0	0	0	0	0	0	0	0	0	0	0	0	0	0	0	0	0	0
(CAATT)n	0	0	0	0	0	0	0	0	0	0	0	0	0	0	0	0	0	0	0	0	0	0	0	0	0	0	0	0	0	0	1	0	0	0	0	0	0	0	1	0	0	1	0	0	0	0	0	0	0
(CACAA)n	1	6	3	2	1	4	5	3	3	2	0	1	11	4	6	3	8	6	6	0	5	4	1	4	5	5	3	3	2	0	3	4	1	1	1	0	2	4	0	2	3	1	1	0	0	6	7	6	0
(CACAC)n	0	0	0	1	2	0	0	2	1	0	0	0	0	0	0	1	2	3	0	0	0	0	0	1	0	0	0	0	0	0	0	1	0	0	0	0	0	0	0	2	0	0	0	1	0	0	0	3	1
(CACAG)n	179	235	136	175	191	127	192	223	181	204	203	198	202	110	132	121	147	118	109	254	221	166	167	264	346	336	349	245	305	192	266	206	171	121	226	159	232	168	135	232	259	347	293	312	220	304	292	272	99
(CACAT)n	1	0	0	0	1	2	0	2	0	4	1	4	0	0	1	2	2	2	0	0	1	0	0	0	3	3	1	1	1	0	0	1	1	0	3	2	1	1	0	2	0	4	0	1	3	1	1	3	8
(CACCAT)n	10	33	51	20	31	19	14	32	16	33	25	45	23	27	19	36	32	44	33	32	35	35	10	44	21	39	31	13	19	14	29	9	24	12	22	26	24	16	15	38	38	52	43	41	29	43	30	61	138
(CACCC)n	81	105	95	104	137	63	100	75	63	101	122	140	127	77	149	100	152	150	113	140	110	104	89	148	122	96	98	114	118	86	107	75	63	48	79	71	105	94	73	92	89	148	124	148	118	117	88	116	51
(CACCT)n	0	0	0	0	0	0	0	0	1	0	0	0	0	0	0	0	0	4	0	0	1	0	0	0	0	0	0	1	1	0	0	0	0	0	0	0	0	1	1	1	0	0	0	1	0	0	0	2	0
(CACG)n	90	97	134	105	99	76	55	80	61	92	114	164	144	74	122	124	145	167	158	159	146	124	103	172	107	126	81	120	137	108	103	105	71	50	95	60	78	90	63	126	194	232	146	165	125	124	124	142	81
(CACGC)n	0	0	0	0	3	3	0	0	0	0	0	0	0	0	0	0	0	0	1	0	6	0	3	3	0	0	1	0	0	0	0	2	0	0	0	4	4	0	1	0	4	3	3	0	0	0	6	3	12
(CACGT)n	0	0	0	0	0	0	0	0	0	0	0	0	0	0	0	0	0	1	0	0	0	0	0	0	0	0	0	0	0	0	0	0	0	0	0	0	0	0	0	0	0	0	0	0	0	0	0	0	0
(CACTA)n	0	1	0	0	0	2	1	0	0	1	3	2	1	0	0	5	5	0	0	5	0	0	0	0	1	2	0	0	1	1	3	3	0	0	2	4	0	0	1	0	4	0	0	0	3	0	1	0	0
(CACTC)n	0	0	0	0	0	0	0	0	0	0	0	3	0	0	0	0	0	0	0	0	0	0	0	0	0	0	0	0	0	0	0	0	0	0	0	0	0	0	0	0	0	1	0	0	0	0	0	0	0
(CACTG)n	167	198	124	260	180	121	178	165	143	177	188	247	203	108	242	152	162	225	208	251	215	182	224	354	289	256	252	209	281	146	281	161	171	96	170	120	232	200	138	187	260	293	234	318	235	188	212	330	83
(CAG)n	7677	9131	7433	10839	7023	3816	5506	5524	4887	6823	6667	8108	10700	9264	12625	8792	10960	12313	7380	11229	8008	7467	7836	15215	6175	6665	5731	5069	7757	3616	7960	4128	4626	2972	3806	3680	6688	6105	2761	5441	5332	9337	6844	9360	7883	7771	6829	9955	5571
(CAGA)n	679	697	803	595	563	373	405	561	415	550	599	1209	1013	661	924	707	976	833	815	701	809	854	634	1082	292	405	278	297	274	429	414	449	353	269	447	304	425	286	314	524	419	831	582	421	665	638	644	718	255
(CAGAA)n	4	3	12	6	17	9	8	3	1	6	7	28	12	14	9	17	27	15	25	24	28	25	23	15	1	7	4	8	3	14	6	6	2	2	4	2	0	6	1	8	11	21	21	8	7	5	11	28	3
(CAGAC)n	1	1	1	0	0	3	0	0	1	0	0	0	0	0	1	0	2	0	2	0	0	0	0	0	0	3	0	0	0	2	0	0	0	0	0	0	1	0	1	0	0	1	0	0	0	1	3	1	3
(CAGAG)n	78	80	84	80	91	38	34	59	49	81	91	137	153	78	144	172	184	169	102	144	95	75	61	141	35	55	30	34	46	83	84	100	67	17	67	61	97	39	29	71	58	123	85	82	53	82	79	107	15
(CAGAGA)n	484	628	702	572	540	304	430	605	448	665	681	939	906	571	802	697	712	832	784	769	868	553	503	979	514	816	675	453	567	499	480	572	533	367	711	502	659	343	380	782	503	1101	842	751	680	929	989	1018	413
(CAGAT)n	0	0	0	0	0	0	0	0	0	1	0	0	0	0	4	0	0	0	1	0	2	1	0	0	0	0	1	0	0	0	0	0	0	0	0	0	0	0	0	0	1	0	0	0	0	0	1	1	2
(CAGC)n	59	77	41	47	57	37	86	75	56	111	99	173	147	41	91	60	120	69	91	126	78	57	59	115	72	73	70	63	63	60	62	75	61	44	50	79	74	43	76	66	67	82	83	79	72	73	119	88	16
(CAGCC)n	6	2	6	2	10	0	4	7	5	1	4	13	8	3	10	7	4	10	0	5	3	4	3	11	2	9	8	3	4	1	8	13	4	4	7	2	5	4	3	3	6	6	2	5	7	6	10	4	6
(CAGCG)n	0	0	0	0	0	0	0	0	0	0	0	0	0	0	0	0	0	0	0	0	0	0	0	0	0	0	0	0	0	0	0	0	0	0	0	0	0	0	0	0	0	0	0	0	0	0	0	0	0
(CAGCT)n	0	0	0	6	1	2	0	1	0	3	4	6	16	0	0	3	0	2	0	0	0	0	0	0	0	7	1	0	0	0	0	0	0	2	0	0	0	0	0	0	0	0	0	5	8	0	0	1	0
(CAGG)n	193	169	196	194	141	100	146	114	101	191	205	274	265	184	243	250	281	226	260	305	194	176	206	284	135	155	136	119	192	135	164	144	138	69	144	88	163	117	55	131	180	194	146	188	155	140	145	179	134
(CAGGA)n	0	1	1	0	1	2	0	0	1	0	1	1	7	2	3	1	7	3	1	0	0	1	0	3	0	1	0	0	0	2	0	0	0	0	1	0	1	0	0	1	1	0	1	1	1	0	1	0	2
(CAGGC)n	0	1	5	1	0	1	3	0	2	2	0	0	2	1	2	0	1	2	0	1	0	0	1	1	0	1	1	0	1	0	2	2	3	0	3	0	0	1	3	1	1	2	2	1	0	1	5	1	4
(CAGGG)n	741	689	355	482	493	204	479	552	377	536	506	628	658	344	446	437	474	286	293	499	462	478	499	948	838	819	559	743	910	700	713	489	494	365	378	358	844	497	356	508	798	947	865	835	691	807	633	821	397
(CAGGT)n	0	0	0	0	0	0	0	0	0	0	0	0	0	0	0	0	0	0	0	0	0	0	0	0	0	0	0	0	0	0	0	0	0	0	0	0	0	0	0	0	0	0	0	0	0	0	0	1	0
(CAGT)n	4	2	3	7	7	6	2	7	4	6	8	7	5	3	2	10	6	7	2	3	8	6	5	6	6	11	14	2	4	8	5	6	4	4	11	8	2	2	1	5	3	6	7	8	5	8	9	7	2
(CAGTA)n	18	10	17	8	7	5	7	12	7	13	3	9	8	19	9	17	10	18	10	6	11	19	9	22	6	6	0	4	3	4	6	10	2	4	4	3	2	4	0	4	4	8	4	3	14	6	7	16	8
(CAGTC)n	0	0	0	0	0	0	0	0	0	0	0	0	0	0	0	0	0	0	0	0	0	0	0	0	0	0	0	0	0	0	0	0	0	0	0	0	0	0	0	0	0	0	0	0	0	0	0	0	0
(CAGTG)n	30	23	4	29	25	13	19	19	11	25	37	61	32	10	21	24	17	27	14	24	16	32	17	33	18	22	11	24	22	25	20	14	22	4	10	16	15	12	7	7	14	21	23	26	27	15	15	27	7
(CAGTT)n	0	0	0	0	0	0	0	0	0	0	0	0	0	0	0	0	1	0	0	0	0	2	0	0	0	1	0	0	0	0	0	0	0	0	2	0	0	0	0	0	0	0	0	0	0	0	0	0	0
(CAT)n	1532	1826	1465	1621	1331	1014	1229	1766	1334	1900	1676	2030	2350	1154	1888	1616	2052	1554	2145	2223	2257	1741	1759	3071	1775	2311	1967	1329	1591	1730	1441	1735	1418	1057	2006	1353	2251	956	952	1763	1313	2939	2214	2032	1653	2686	2231	2743	672
(CATA)n	1054	1172	1348	1303	1374	414	789	829	571	896	1157	1203	1547	987	1675	1092	1674	1413	1340	1514	589	810	1044	1931	985	795	547	788	1190	762	1072	808	830	670	731	637	765	801	302	508	665	843	863	1216	765	852	1012	1165	417
(CATAA)n	0	0	0	0	0	1	0	0	2	0	0	0	0	0	0	1	1	0	1	0	0	0	0	0	0	0	0	0	0	0	0	0	1	0	0	0	0	0	0	1	0	0	0	1	0	0	0	0	1
(CATAC)n	0	2	0	0	0	2	0	0	0	0	0	0	0	0	0	0	0	1	0	0	0	5	0	1	1	2	0	0	0	0	0	4	0	0	0	0	0	1	0	1	1	1	1	0	0	1	0	3	0
(CATAG)n	0	0	0	0	0	0	0	3	0	0	0	0	0	1	0	0	0	0	2	0	0	0	0	0	0	0	0	0	0	0	0	0	0	0	0	0	0	0	0	2	0	2	0	0	1	1	2	1	0
(CATAT)n	1	0	6	0	0	0	0	0	0	0	0	0	0	0	0	0	3	0	0	0	0	0	0	0	0	0	0	0	0	0	0	0	0	0	0	1	1	0	0	0	0	1	1	0	0	0	0	0	0
(CATATA)n	354	291	302	206	189	108	154	175	140	179	291	301	565	322	413	304	500	381	398	268	161	289	156	340	176	144	123	106	150	229	180	146	115	94	134	133	131	90	82	121	147	196	155	190	218	241	235	229	88
(CATCC)n	0	0	0	0	1	0	0	0	0	0	0	0	0	0	0	0	0	0	0	0	0	0	0	0	0	0	0	0	0	0	0	0	0	0	0	0	1	0	0	0	0	0	0	0	0	0	0	0	0
(CATCT)n	0	0	0	0	0	0	0	0	0	0	0	0	0	0	0	0	0	0	0	0	0	0	0	0	0	0	0	0	0	0	0	0	0	0	0	0	0	0	0	0	0	0	0	0	0	0	0	0	0
(CATG)n	6	1	2	6	2	5	1	2	0	0	1	3	9	1	5	2	5	13	7	1	7	4	5	7	5	1	4	1	0	1	2	3	2	0	2	1	8	1	0	3	5	12	5	4	4	8	6	12	11
(CATGC)n	0	0	0	0	0	1	0	0	0	0	0	0	0	0	0	2	0	0	2	3	1	0	1	0	0	2	3	0	0	0	1	0	0	0	1	0	3	0	0	3	0	2	3	1	0	0	2	1	0
(CATGT)n	0	0	0	0	0	0	0	0	0	0	0	0	0	0	0	0	0	1	0	0	0	0	0	0	0	0	0	0	0	0	0	0	0	0	0	0	0	0	0	0	0	0	0	0	0	0	1	0	0
(CATTA)n	0	0	0	1	0	1	0	0	0	0	0	0	0	0	0	0	0	0	0	0	1	0	0	0	0	0	0	0	0	0	1	0	0	0	0	0	1	0	0	0	0	0	0	1	0	0	1	0	0
(CATTC)n	0	0	1	0	1	0	0	0	1	0	0	0	0	0	2	0	0	1	0	0	0	1	2	0	3	0	0	0	1	2	1	0	0	0	0	0	2	0	1	0	0	0	1	1	0	0	2	1	0
(CATTG)n	0	0	0	0	0	0	0	0	0	0	0	0	0	0	0	0	0	0	0	0	0	0	0	2	0	0	0	0	0	0	0	0	0	0	0	0	0	0	0	0	0	0	0	0	0	0	0	0	0
(CATTT)n	0	0	0	2	0	0	0	0	0	0	0	0	0	0	0	0	0	0	0	0	0	0	0	1	0	0	0	0	1	0	0	0	0	0	0	0	0	0	0	0	0	0	0	0	0	0	2	0	0
(CCA)n	460	572	500	545	458	326	395	462	404	578	616	788	850	455	730	678	664	731	677	667	658	575	552	816	515	478	463	399	400	360	480	444	429	273	471	380	588	417	317	528	670	994	714	760	612	634	609	751	571
(CCAA)n	67	43	42	18	34	31	35	26	34	53	56	63	71	18	47	34	64	69	64	74	62	60	40	74	34	44	23	28	36	28	31	56	41	22	31	41	41	36	13	38	47	91	63	44	64	51	61	78	43
(CCCA)n	1	5	5	1	1	1	4	6	11	1	6	4	9	5	3	1	10	5	5	5	4	1	5	6	5	8	7	0	6	6	3	7	4	6	6	1	10	4	4	10	3	11	12	7	10	13	6	7	8
(CCCCAA)n	44	21	9	28	9	10	10	23	16	18	21	27	45	20	41	19	21	23	6	11	13	9	20	25	24	19	5	13	14	10	10	6	13	5	8	6	16	9	5	12	17	26	6	9	30	16	19	9	12
(CCCCAG)n	195	345	229	216	166	153	193	249	194	182	165	246	221	179	272	187	200	276	167	244	316	227	237	385	231	230	225	164	211	126	202	159	179	139	155	166	250	161	148	201	243	452	230	251	254	289	264	260	205
(CCCCCA)n	75	85	75	70	57	51	61	55	65	100	94	129	93	59	98	86	98	87	93	102	91	85	78	109	110	93	87	53	79	55	81	90	56	30	79	57	81	50	47	87	162	229	153	108	101	59	123	100	52
(CCCCCG)n	2	10	11	3	12	6	5	3	4	6	1	8	11	3	14	13	16	17	9	19	9	11	7	34	6	10	4	8	4	7	7	6	6	6	6	11	5	14	3	13	14	26	9	11	20	14	16	14	9
(CCCCCT)n	4	3	3	4	2	4	2	9	1	5	4	8	13	6	3	3	5	6	5	8	7	7	11	4	2	7	11	2	8	1	6	1	1	1	9	1	7	2	4	4	8	10	5	6	9	6	8	6	24
(CCCCG)n	114	123	109	97	140	83	117	151	99	157	162	221	137	83	125	99	130	96	109	173	171	133	107	264	129	177	170	91	150	113	106	143	133	91	144	118	114	57	86	156	108	207	170	162	103	173	179	144	46
(CCCG)n	3	1	0	3	2	0	0	1	0	0	0	2	2	1	2	3	1	1	2	0	1	2	1	3	1	7	1	1	0	0	1	1	2	0	1	1	1	0	0	4	0	2	1	1	0	0	2	3	6
(CCCGAA)n	124	233	176	128	168	174	168	211	125	184	235	209	144	97	172	147	222	103	164	138	73	99	63	122	165	197	125	152	147	159	151	152	179	95	121	142	82	87	83	65	161	306	136	120	105	101	164	199	147
(CCCGG)n	0	1	0	1	0	0	0	0	0	0	2	0	0	1	0	1	0	1	0	0	1	0	2	0	0	0	2	0	3	0	0	2	0	0	0	1	0	0	0	0	0	0	0	0	1	0	0	0	0
(CCCTA)n	0	0	0	0	0	0	0	0	0	0	0	0	0	0	0	0	0	1	0	0	0	0	0	0	0	0	0	0	0	0	0	0	0	0	0	0	0	0	0	0	0	0	0	0	0	0	0	0	0
(CCCTAA)n	21	17	37	19	17	19	15	25	13	23	37	34	27	13	23	28	46	37	25	36	24	28	31	36	24	19	11	20	20	31	26	18	13	19	19	7	8	14	13	23	27	49	31	25	31	17	27	28	29
(CCCTAG)n	0	1	0	0	0	0	0	0	0	0	0	0	0	0	0	0	0	0	1	0	0	1	0	0	0	0	0	1	0	1	1	0	0	0	0	0	0	0	0	0	0	0	0	0	0	0	0	0	0
(CCCTG)n	1	9	2	3	4	5	7	2	5	5	1	3	1	1	8	3	11	5	3	4	7	0	4	1	4	4	11	7	9	6	2	8	4	2	2	4	5	4	3	8	11	12	3	11	4	5	9	8	16
(CCG)n	420	607	355	328	388	344	427	544	360	571	609	742	546	266	475	445	402	420	373	763	888	424	584	1054	547	782	687	420	463	467	500	571	570	485	545	577	512	230	363	743	462	1023	1055	904	422	613	886	708	224
(CCGAA)n	1	0	0	0	2	0	0	2	0	0	0	0	0	0	0	0	0	1	0	0	0	0	1	0	0	0	0	0	0	0	0	0	0	0	1	0	0	0	0	0	0	0	2	0	0	0	1	1	3
(CCGAG)n	22	77	43	54	49	42	27	52	45	32	28	25	59	33	79	69	43	84	27	70	80	39	34	89	53	48	60	32	32	18	53	29	35	55	35	51	80	29	30	75	48	153	96	77	69	116	70	90	21
(CCGCG)n	3	18	7	2	6	6	9	9	0	11	12	15	5	3	12	6	4	9	9	12	19	12	15	24	1	2	8	7	6	6	8	11	8	3	8	7	14	4	5	10	3	18	9	5	4	8	10	12	1
(CCGGG)n	58	30	43	47	42	19	30	28	17	40	47	41	80	44	61	68	120	76	53	79	26	37	24	78	25	15	14	34	26	40	34	16	25	13	28	19	32	39	7	21	16	53	48	37	23	38	45	32	2
(CCTA)n	0	1	0	0	0	0	0	0	0	0	0	0	0	0	1	0	0	2	0	0	0	0	0	0	0	0	1	3	0	1	0	1	0	0	1	0	3	0	0	0	0	0	0	0	0	1	0	3	1
(CCTAA)n	0	0	0	0	0	0	0	0	0	0	0	0	0	0	0	0	0	0	0	0	0	0	0	1	0	0	0	0	0	0	0	0	0	0	0	0	0	0	0	0	0	0	0	0	0	0	0	0	0
(CCTAT)n	0	0	0	0	0	0	0	0	0	0	0	0	0	0	0	0	0	0	0	0	0	0	0	0	1	0	0	0	1	0	0	0	0	0	0	0	0	0	0	0	0	0	0	0	0	0	0	0	0
(CCTCG)n	3	1	0	0	0	2	3	4	1	4	4	2	0	0	2	0	1	3	1	3	1	3	0	1	2	5	4	4	4	1	1	3	5	7	7	6	0	1	0	0	3	0	1	1	0	1	2	1	1
(CCTG)n	29	25	16	8	17	6	8	19	13	18	9	23	35	12	21	17	27	25	24	14	34	25	16	31	15	18	19	11	28	12	22	14	11	14	8	17	17	7	9	16	28	44	24	24	38	15	17	20	81
(CCTTG)n	1	0	3	0	1	4	1	0	1	1	5	4	11	3	10	2	9	8	6	16	14	13	8	11	1	1	1	5	0	4	2	3	1	2	0	1	4	2	7	3	10	15	14	6	15	3	4	9	14
(CG)n	0	3	3	0	1	1	0	3	1	3	1	4	1	1	4	2	2	8	2	2	4	5	1	6	1	5	1	0	1	0	1	7	1	0	6	1	2	1	2	0	1	2	3	2	3	2	4	4	2
(CGA)n	179	262	200	280	139	105	126	154	147	185	199	304	287	252	282	269	248	217	228	274	123	197	179	265	98	140	112	84	102	148	113	83	96	72	78	62	124	53	74	111	131	215	120	108	182	226	145	150	57
(CGAA)n	0	0	0	0	0	0	0	0	0	0	0	0	0	0	0	0	1	0	0	0	1	0	0	0	0	0	0	0	0	0	0	0	0	0	0	0	0	0	0	0	0	0	0	0	0	0	0	1	0
(CGAAA)n	0	0	0	0	0	0	0	1	0	0	0	0	0	0	0	0	0	0	0	0	0	0	0	0	0	0	0	0	0	0	0	0	0	0	0	0	0	0	0	0	0	0	0	0	0	0	0	0	0
(CGAAG)n	0	0	0	0	0	0	0	0	0	0	0	0	0	0	0	0	0	0	0	0	0	0	0	0	0	0	0	0	0	0	0	0	0	0	0	0	0	0	0	0	0	1	0	0	0	0	0	0	0
(CGAG)n	16	19	39	16	11	8	25	34	16	38	29	24	28	15	21	14	28	22	25	40	44	19	19	50	42	79	48	22	39	21	21	35	30	23	46	48	23	11	36	57	27	101	56	74	33	75	85	61	12
(CGAGG)n	1	8	10	2	7	5	11	2	3	6	4	7	9	3	12	8	10	12	18	11	21	18	13	19	6	18	11	2	0	3	3	10	17	3	7	2	8	2	7	21	15	6	13	7	6	14	21	15	1
(CGAT)n	1	0	0	0	0	0	0	0	0	0	0	0	0	0	0	0	0	0	0	0	0	0	0	0	0	0	0	0	3	0	0	0	0	0	0	0	0	0	0	0	0	0	0	0	0	0	0	0	3
(CGATG)n	0	0	0	0	1	0	0	0	0	0	0	0	0	0	0	0	0	0	0	0	0	0	0	0	0	0	0	0	0	0	0	0	0	0	0	0	0	0	0	0	0	0	1	0	0	0	0	0	0
(CGCGG)n	2	2	0	0	1	0	3	2	1	4	2	1	1	0	0	1	1	1	0	3	5	0	1	6	4	5	3	0	3	0	1	5	1	3	2	0	2	0	1	5	0	2	4	3	4	0	5	1	1
(CGCTG)n	10	31	19	34	11	18	14	21	16	19	9	34	47	20	33	19	19	25	13	28	21	22	21	28	12	9	12	7	15	18	10	11	8	3	10	6	12	10	8	14	14	20	12	8	15	14	24	10	2
(CGG)n	297	400	294	266	297	279	278	380	263	373	341	455	485	263	483	388	352	460	431	559	711	388	415	744	334	473	436	227	291	243	327	330	373	283	363	327	332	188	235	477	312	754	584	526	359	478	562	498	290
(CGGA)n	64	98	70	69	61	41	86	69	48	83	106	97	91	51	67	58	65	52	34	57	61	39	43	90	68	87	64	67	86	49	91	62	61	34	84	44	50	22	25	67	92	131	92	83	74	77	127	82	17
(CGGAA)n	0	1	1	0	0	0	0	0	1	0	0	0	0	0	1	0	0	0	0	0	0	0	0	0	1	2	2	0	1	0	0	0	1	2	0	0	0	0	0	0	1	1	0	1	0	2	0	1	0
(CGGAG)n	25	13	21	14	15	16	17	8	11	12	39	29	38	13	25	20	29	22	35	22	21	12	12	24	4	5	8	10	9	12	18	9	7	6	12	9	4	10	2	9	9	3	6	4	8	5	27	12	8
(CGGG)n	3	4	2	0	0	0	1	0	2	0	4	4	1	1	3	3	1	2	2	1	4	1	6	2	4	1	1	1	4	1	3	4	1	2	3	2	0	1	5	3	1	5	1	0	1	2	3	0	0
(CGGGG)n	12	24	29	21	14	6	19	29	13	27	23	40	18	28	26	22	24	24	15	34	33	24	26	54	17	21	25	16	26	14	20	13	13	7	17	11	27	8	23	36	27	36	31	23	26	25	22	24	16
(CGGGGG)n	0	1	1	0	0	0	0	0	0	0	1	0	1	1	0	2	0	2	0	1	1	1	2	1	0	0	1	0	0	0	0	0	0	1	1	1	1	0	0	1	1	1	0	0	0	0	1	0	1
(CGGT)n	0	0	0	0	0	0	0	0	0	0	0	0	0	0	0	0	0	0	0	0	0	0	0	0	0	0	0	1	0	0	0	0	0	0	0	0	0	0	0	0	0	0	0	0	0	0	0	0	0
(CGGTG)n	0	0	0	1	0	0	0	0	0	0	0	0	0	0	0	0	0	1	0	0	0	0	0	0	0	0	0	0	0	0	0	0	0	0	0	0	0	0	0	0	0	0	0	0	0	0	0	0	0
(CGTG)n	2396	2795	1867	2280	1921	954	1776	1938	1379	2379	2964	3863	4178	2162	3162	2587	3210	2844	2710	2771	1836	2271	1777	3589	2200	2170	1858	1819	2476	1971	1980	1472	1559	849	1513	1012	1695	1319	948	1474	2114	2759	1995	1938	2267	2065	1906	2173	1690
(CGTTG)n	67	69	42	43	67	40	45	50	46	57	89	104	103	34	94	106	81	77	76	103	83	75	64	119	55	46	51	93	62	77	89	43	63	43	25	54	51	33	31	47	82	83	88	100	27	40	67	52	60
(CTA)n	6	7	4	5	4	1	1	5	3	3	11	10	7	9	9	9	8	18	12	4	6	7	10	15	3	13	3	4	5	2	3	7	4	2	4	7	5	3	2	5	2	8	7	2	3	8	6	10	9
(CTAA)n	1	3	0	2	2	0	1	1	0	1	0	0	1	0	1	2	4	3	0	0	0	1	0	1	0	0	0	1	0	5	1	2	2	0	0	0	2	0	0	0	0	6	1	1	1	0	0	0	0
(CTAAA)n	0	0	0	0	0	0	1	0	0	0	0	0	1	0	0	0	0	1	0	0	1	0	1	1	0	0	0	0	0	0	0	1	0	0	0	0	0	0	0	0	1	0	1	1	1	0	0	0	0
(CTAAG)n	0	0	0	0	0	0	0	0	0	0	0	0	0	0	0	0	0	0	0	0	0	0	0	0	0	0	0	0	0	0	0	0	0	0	0	0	0	0	0	0	0	0	0	0	0	0	0	1	0
(CTAAT)n	1	0	0	0	0	0	0	0	0	0	0	0	0	0	0	0	0	0	0	0	0	0	0	0	0	0	0	0	0	0	0	0	0	0	0	0	0	0	0	0	0	0	0	0	0	0	0	1	0
(CTACT)n	4	1	1	3	0	2	2	1	0	3	3	2	4	2	0	2	3	4	1	1	1	1	0	1	0	0	1	0	0	0	0	0	0	0	0	0	0	0	0	0	0	0	2	0	2	1	2	1	0
(CTAG)n	0	0	0	0	0	0	0	0	0	0	0	0	0	0	0	0	0	0	0	0	0	0	0	0	0	0	0	0	0	0	0	0	0	0	0	0	0	0	0	0	0	0	0	0	0	0	0	0	0
(CTAGG)n	0	0	0	0	0	0	0	0	0	0	0	0	0	0	0	0	4	1	0	0	0	0	0	0	0	0	0	0	0	0	0	0	0	0	0	0	0	0	0	0	0	0	0	0	0	0	0	1	0
(CTAGGG)n	0	0	0	0	0	0	1	0	0	0	0	0	1	0	0	0	1	0	0	0	1	0	2	0	0	0	0	0	0	0	0	0	0	0	0	0	0	0	0	0	0	0	0	0	0	0	0	0	3
(CTAGT)n	0	0	0	0	0	0	0	0	0	0	0	0	0	0	0	0	0	1	0	0	0	0	0	0	0	0	0	0	0	0	0	0	0	0	0	0	0	0	0	0	0	0	0	0	0	0	0	0	0
(CTATA)n	6	0	0	2	2	0	0	0	0	1	0	0	1	3	0	2	0	1	0	0	0	0	0	0	3	0	0	0	0	0	1	2	1	0	0	2	0	0	0	0	0	0	0	1	0	1	0	1	1
(CTATG)n	0	4	0	0	1	0	0	0	0	0	0	2	0	0	0	4	1	0	0	0	0	0	0	5	0	0	0	2	0	0	0	0	0	0	0	0	0	0	0	1	0	1	0	0	1	2	0	0	0
(CTATT)n	0	0	0	0	0	1	0	0	0	0	0	0	0	0	0	0	1	0	0	0	0	0	0	0	0	0	1	0	0	0	0	0	1	0	0	0	0	0	0	0	0	0	0	0	0	0	0	1	0
(CTCA)n	32	41	34	44	35	18	17	32	16	28	40	80	68	43	55	51	66	57	53	82	53	69	45	84	15	15	13	24	22	22	34	25	25	10	15	6	27	28	15	27	13	32	34	22	40	43	29	63	44
(CTCCG)n	63	54	21	38	55	35	36	62	48	46	20	44	26	40	48	46	35	34	32	63	74	40	59	93	90	50	72	22	56	20	52	31	49	30	27	59	60	29	33	44	56	123	78	65	43	62	53	55	4
(CTCG)n	143	360	208	154	133	139	210	267	227	288	315	283	219	132	201	161	185	132	231	233	430	228	160	412	177	349	279	152	163	215	194	246	174	115	393	181	168	95	175	341	240	512	318	350	264	382	440	339	21
(CTCGG)n	1	6	7	12	3	7	1	3	4	1	10	14	13	6	2	5	7	7	0	12	5	0	2	17	11	0	2	0	0	6	0	0	7	14	5	0	4	0	1	0	8	1	9	10	3	2	7	0	2
(CTCTG)n	39	37	41	35	43	15	23	28	22	42	43	54	70	42	54	71	81	63	58	61	53	22	34	55	14	17	16	15	19	38	25	35	34	5	38	19	43	13	14	33	31	37	28	33	22	43	28	42	7
(CTG)n	1619	2091	1534	1607	1400	919	1420	1542	1277	1828	1853	2203	2357	1536	2516	2025	2118	2159	2153	2167	2211	1642	1475	3067	1633	1990	1638	1268	1623	1238	1248	1342	1332	956	1424	1226	1823	1202	937	1826	1502	2954	1994	2040	1634	2201	2247	2194	2383
(CTGGGG)n	97	174	149	125	130	85	94	112	114	141	124	107	165	103	202	180	177	243	142	171	177	142	144	286	125	165	121	58	57	83	121	149	153	80	124	131	96	69	90	211	138	280	231	177	109	194	138	206	74
(CTGTG)n	5	10	6	3	7	9	4	6	11	5	10	10	12	8	6	8	12	4	4	6	10	4	9	8	8	5	6	15	2	6	7	20	12	6	2	14	8	0	3	12	10	22	4	11	13	10	10	9	66
(CTTA)n	0	2	1	0	3	0	0	4	1	0	1	0	1	0	0	0	1	4	0	0	2	0	0	4	0	1	1	0	1	3	1	0	1	0	1	1	0	1	2	0	0	1	0	1	0	1	0	1	7
(CTTAT)n	0	0	0	0	0	0	0	0	0	0	0	0	0	0	0	0	1	0	0	0	0	0	0	0	0	0	0	0	0	0	0	0	0	0	0	0	0	0	0	0	0	0	0	0	0	0	0	0	0
(CTTCG)n	0	0	0	0	0	0	0	0	0	2	0	0	0	0	0	0	0	0	0	0	0	0	0	0	0	0	0	0	0	0	0	0	0	0	0	0	0	0	0	0	0	0	0	1	0	0	1	0	0
(CTTG)n	3	3	5	2	3	1	1	0	6	4	2	6	14	6	5	2	15	11	6	8	12	6	6	12	1	5	2	1	4	4	2	6	0	0	4	3	2	2	1	0	5	6	3	5	3	5	5	5	5
(CTTTG)n	3	4	15	4	4	0	9	10	10	15	8	8	7	6	10	5	11	9	12	15	5	5	3	9	5	8	3	4	11	5	1	7	9	5	10	4	4	4	3	6	12	17	18	10	13	17	11	3	16
(G)n	17	32	18	10	20	14	21	19	21	17	29	32	20	15	16	21	18	23	8	24	28	18	25	33	16	14	15	15	20	11	22	22	21	11	16	11	28	10	21	20	18	37	21	26	35	25	21	21	10
(GA)n	1277	1463	1317	1418	1120	657	950	1208	874	1291	1594	1941	2302	1320	1909	1613	1992	1852	1708	1790	1287	1325	1176	2144	1161	1250	1084	979	1181	1117	1153	1052	1006	626	1066	893	986	659	515	966	852	1684	1241	1240	1172	1429	1404	1414	1063
(GAA)n	609	756	598	619	451	382	425	642	432	665	595	895	1144	819	1040	732	922	784	890	863	814	887	626	1167	563	705	591	355	489	466	402	492	438	350	619	501	707	369	432	656	630	1034	789	785	692	1110	1047	1067	487
(GAAA)n	970	1389	1133	1264	1051	535	657	831	673	1072	1471	1668	2087	976	1716	1281	1525	1442	1580	1476	1111	963	865	1578	840	1195	780	937	1131	1218	1044	1221	1018	615	1273	923	763	557	560	895	818	1442	1296	1362	1013	1351	1440	1171	443
(GAAAA)n	73	100	104	58	108	57	71	82	89	89	122	168	177	77	178	102	139	157	115	162	154	137	120	168	92	150	95	74	113	103	91	160	92	85	105	106	128	75	66	129	70	214	178	158	130	204	247	185	61
(GAATG)n	0	0	0	0	0	0	0	0	0	0	0	0	0	0	0	0	0	0	0	0	0	0	0	0	0	0	0	0	0	0	0	0	0	0	0	0	0	0	0	0	0	0	0	0	0	0	0	0	1
(GACTG)n	0	0	0	0	0	0	0	0	0	0	0	0	0	0	0	0	0	1	0	0	0	0	0	0	0	0	0	0	0	0	0	0	0	0	0	0	0	0	0	0	0	0	0	0	0	0	0	0	0
(GAGAA)n	24	20	17	12	22	14	12	36	10	16	28	29	33	17	14	18	27	28	27	36	21	24	25	27	26	45	21	15	23	24	10	18	21	14	20	9	12	8	13	19	25	34	37	30	10	16	46	20	37
(GAGTG)n	0	0	0	0	0	0	0	0	0	0	0	0	0	0	0	0	0	0	0	0	0	0	0	0	0	0	0	0	0	0	0	0	0	0	0	0	0	0	0	2	2	0	1	1	0	0	0	0	0
(GCATG)n	0	0	0	0	0	0	0	0	0	0	0	0	0	0	0	0	0	1	0	0	0	0	0	0	0	0	0	0	0	0	0	0	0	0	0	0	0	0	0	0	0	0	0	0	0	0	0	0	0
(GCCTAA)n	1	0	0	0	0	0	1	0	0	0	0	1	0	0	2	0	0	0	2	0	1	0	0	1	0	1	0	0	0	0	0	0	1	0	0	0	0	0	1	0	0	5	0	1	0	0	1	0	0
(GCCTG)n	9	32	19	28	18	10	21	27	27	18	34	36	43	16	12	8	16	19	8	20	20	5	19	30	34	36	43	21	29	23	18	26	16	16	17	10	18	14	6	22	28	41	18	31	38	29	28	15	35
(GCGTG)n	26	11	5	28	25	4	14	13	11	18	15	20	23	13	15	12	24	15	16	23	17	17	17	39	25	20	14	15	32	13	22	19	7	9	12	8	10	17	9	10	20	21	15	27	13	6	23	18	7
(GCTG)n	0	1	0	1	0	3	0	2	0	0	1	2	0	0	0	2	4	1	0	1	1	0	1	3	0	0	0	0	1	1	0	0	1	0	0	1	2	1	0	1	3	2	0	1	2	1	0	2	2
(GCTTG)n	12	28	12	3	7	12	13	32	13	20	20	19	33	5	22	14	14	7	11	12	10	2	11	16	29	35	21	12	18	10	9	24	9	18	24	15	5	7	11	25	16	24	15	17	20	28	21	26	8
(GGA)n	606	904	811	653	732	525	627	783	711	898	844	1162	1270	724	1175	870	946	977	942	1135	1117	771	710	1500	921	1138	997	623	825	635	682	788	769	418	932	685	828	495	488	887	880	1562	1092	1168	936	1176	1254	1291	949
(GGAA)n	71	70	67	64	73	71	80	102	68	107	73	115	87	70	103	96	84	75	75	89	106	84	65	98	116	135	98	70	114	79	71	91	97	53	132	109	87	40	48	92	88	150	137	130	122	130	136	121	66
(GGAAA)n	6	6	4	8	16	14	14	12	21	21	14	24	11	4	14	5	15	16	7	9	10	8	9	11	16	25	26	13	13	8	7	18	7	16	20	20	8	6	4	24	17	19	20	16	19	20	17	23	3
(GGAGA)n	49	45	35	34	21	30	50	37	26	27	45	49	66	39	46	41	45	43	47	55	31	44	29	60	37	70	54	25	47	48	28	35	26	22	41	22	26	17	25	30	42	69	40	34	59	43	44	34	129
(GGAGAA)n	32	37	17	31	30	30	39	44	34	45	42	57	42	15	28	24	26	37	24	44	51	43	31	69	61	63	60	23	52	27	37	53	41	41	89	46	32	18	32	68	51	105	70	73	51	87	82	57	18
(GGATG)n	0	3	0	0	0	1	1	3	1	3	0	5	1	0	0	3	6	1	0	0	4	0	5	6	2	0	1	6	3	2	2	10	1	0	5	6	1	3	1	0	5	4	1	0	4	3	0	0	2
(GGCTG)n	39	53	32	62	54	14	36	27	25	33	52	50	50	31	65	41	46	44	29	57	37	59	36	62	54	35	33	52	53	41	52	39	42	16	25	14	37	41	15	22	37	35	16	43	36	40	38	45	66
(GGGA)n	104	108	132	133	200	108	120	139	91	161	140	148	158	120	175	163	197	197	159	177	199	162	125	289	151	160	118	129	141	124	133	84	100	74	109	88	114	100	61	153	233	379	181	190	192	123	140	141	125
(GGGAA)n	0	0	1	0	0	0	0	2	0	0	0	0	0	0	0	0	0	0	1	1	1	1	1	1	1	0	2	0	0	0	1	1	0	0	0	4	0	0	0	0	0	0	2	1	0	1	2	1	0
(GGGAGA)n	35	30	15	42	26	15	32	31	19	42	47	67	35	22	33	20	38	31	29	46	24	34	32	61	36	31	29	33	31	29	30	33	22	17	22	15	30	18	8	16	43	62	19	28	20	11	42	34	31
(GGGGA)n	5	0	2	1	2	2	8	1	3	1	5	2	1	3	1	0	5	5	5	5	2	0	1	2	2	2	3	1	4	1	0	1	1	0	1	1	0	2	0	3	7	13	3	4	5	2	9	2	5
(GGGTG)n	157	207	152	184	204	112	146	142	99	162	197	302	176	115	279	235	182	182	200	228	182	164	201	319	199	159	155	189	204	141	180	119	139	70	90	103	219	130	84	124	188	270	200	258	171	194	119	187	197
(GGTTG)n	0	0	3	0	0	0	0	0	1	0	0	0	0	0	1	1	0	1	0	0	0	0	0	0	0	0	0	0	0	0	0	0	0	0	0	1	0	1	0	0	0	1	0	1	0	0	0	0	0
(GTATG)n	0	0	0	0	0	0	0	0	0	0	0	2	0	0	0	0	5	1	7	0	0	0	0	2	0	0	4	3	0	0	0	0	0	0	0	3	0	0	0	2	1	1	0	0	0	8	0	0	0
(GTCTG)n	1	6	7	8	5	3	2	5	9	4	4	4	7	1	4	2	3	5	3	5	7	7	4	5	8	11	8	3	12	4	0	8	7	8	11	0	3	1	4	3	9	11	12	4	3	5	3	6	8
(GTGTG)n	37	28	27	25	36	23	15	19	19	27	21	59	37	21	26	29	28	35	23	31	37	32	15	29	11	14	15	12	11	13	20	22	8	12	24	4	21	14	9	25	17	26	21	18	26	21	40	27	50
(GTTTG)n	779	1081	539	1032	991	532	649	948	780	976	1027	1309	1141	500	645	729	694	724	814	1036	880	1074	631	2056	1422	1031	1142	1141	1337	899	1371	994	986	575	921	830	1149	795	563	657	1000	1746	1101	1215	1252	1199	938	1410	249
(T)n	4515	6134	4568	3198	3310	2521	3208	5076	2625	4241	5457	6250	6870	3370	5769	3870	5816	4307	5424	5931	4228	4736	4373	7154	4217	4682	3548	2773	4669	3743	4599	5614	3343	3799	4776	3946	3351	2316	1737	3541	2860	6268	5781	6371	5619	6404	7403	5916	2705
(TA)n	3625	2725	1796	610	361	332	263	390	191	351	674	845	1001	362	676	508	991	1004	1043	663	349	601	642	665	239	193	222	261	443	547	590	685	235	315	603	726	171	161	90	188	228	552	330	761	428	992	446	446	189
(TAA)n	214	188	741	86	297	231	117	193	91	286	548	640	685	455	1210	673	1104	860	1540	939	448	591	473	798	44	71	35	82	60	209	202	205	160	112	207	158	154	174	92	149	126	170	248	214	223	205	324	602	140
(TAAA)n	170	133	125	91	105	50	75	103	46	107	133	162	207	112	166	138	253	151	169	126	81	86	107	185	91	94	52	80	98	110	112	80	78	62	89	55	56	69	32	59	85	133	88	123	97	93	89	144	135
(TAAAA)n	17	15	22	5	9	15	17	14	8	12	15	27	51	20	31	22	40	35	39	22	15	27	24	15	8	6	7	8	7	10	12	13	9	1	14	2	8	5	6	2	12	17	15	21	13	6	21	16	15
(TAAAAA)n	21	33	23	8	12	10	13	27	14	22	23	34	35	22	47	32	42	33	40	37	17	17	24	29	10	18	7	12	10	15	8	16	9	10	15	17	15	10	12	15	11	25	26	13	19	32	17	32	23
(TAAAG)n	0	0	0	0	0	0	0	0	0	0	0	0	0	0	0	0	0	0	0	0	0	0	0	0	0	0	0	0	0	0	0	0	0	0	0	0	0	0	0	0	0	0	0	0	0	0	0	1	0
(TAAG)n	2	3	1	0	2	1	1	2	0	1	5	2	0	1	2	3	3	1	1	2	4	6	0	8	1	1	3	1	0	1	3	0	0	0	3	2	1	0	0	0	3	3	1	5	1	3	1	2	2
(TAATG)n	0	0	0	0	1	0	0	0	0	1	1	0	1	0	1	0	3	1	2	1	0	1	0	0	0	2	0	0	0	0	0	1	0	0	0	1	0	0	0	0	0	2	0	1	0	0	0	1	0
(TACTG)n	0	0	0	0	0	0	0	0	0	0	0	0	0	0	0	0	1	0	0	0	0	0	0	0	0	0	0	0	0	0	0	0	0	0	0	0	0	0	0	0	0	1	0	0	0	0	1	0	0
(TAG)n	81	135	102	82	109	58	86	120	85	119	184	266	198	98	137	123	114	127	175	152	187	143	165	203	61	103	87	52	67	62	53	81	62	45	92	77	114	62	61	68	66	156	85	54	96	126	118	141	23
(TAGA)n	1980	1466	2417	1612	2111	1104	898	1085	978	1713	2354	3074	3999	2274	4008	3072	4202	3527	3718	3144	2154	3127	2274	3681	540	680	397	958	619	2516	1833	1475	1352	789	1541	1131	1812	1138	774	1054	936	1835	1193	1033	1201	1756	2033	3345	579
(TAGG)n	11	5	0	0	0	0	0	1	1	0	0	2	3	0	8	2	4	11	0	8	0	0	0	0	0	0	2	0	0	0	0	1	0	0	0	0	0	1	0	1	0	0	1	1	0	1	0	2	6
(TAGTG)n	0	1	0	0	0	0	0	0	0	0	0	1	0	0	0	0	2	0	0	0	0	0	0	1	0	0	0	0	0	0	0	0	0	0	0	0	0	0	0	0	0	0	0	0	0	0	0	1	0
(TATAA)n	0	2	2	0	1	2	0	1	0	1	0	0	0	0	0	2	3	0	2	2	0	0	0	0	0	1	0	0	0	0	0	0	0	1	1	0	0	0	0	0	0	0	0	0	1	0	4	5	2
(TATAG)n	0	1	2	1	0	0	1	0	0	0	0	1	0	0	0	0	2	2	0	0	0	0	0	3	0	0	0	0	0	0	0	0	1	0	0	0	1	0	0	0	2	0	0	0	0	0	0	1	0
(TATATG)n	223	234	197	116	69	62	81	140	74	138	156	185	339	169	199	173	275	199	206	180	95	164	113	213	98	131	106	85	104	144	108	137	104	85	147	80	73	41	39	88	73	134	132	121	152	118	155	165	103
(TATG)n	546	566	507	491	417	217	309	404	310	425	651	671	840	389	549	481	652	552	514	651	362	400	456	689	373	382	303	317	410	464	378	392	320	211	390	278	333	244	163	267	381	503	364	425	422	442	418	434	305
(TATTG)n	0	0	0	2	0	0	0	0	1	0	0	0	2	0	2	0	0	0	0	0	0	0	0	0	0	0	1	0	0	1	0	0	0	0	0	0	0	0	0	3	1	3	1	0	0	1	0	0	0
(TC)n	1017	1139	1020	1047	1073	627	847	1090	829	1151	1257	1506	1791	1039	1429	1076	1664	1373	1407	1595	1400	1235	976	2060	1005	1230	949	776	1010	903	929	937	840	612	1010	809	843	571	520	910	920	1670	1174	1088	1181	1525	1404	1410	883
(TCC)n	1185	1699	1531	1178	1210	919	1205	1660	1247	1813	1744	2239	2650	1419	2397	1716	1989	1894	2157	2121	2155	1728	1562	3084	1398	2046	1635	1015	1283	1102	1276	1383	1263	922	1510	1166	1575	895	859	1688	1161	2941	1983	1862	1598	2290	2319	2381	871
(TCCA)n	52	89	50	68	85	45	78	58	59	103	102	139	75	40	81	53	70	91	64	101	64	89	57	110	97	78	83	99	103	71	79	62	70	46	59	46	64	46	47	82	84	134	79	109	93	109	81	84	25
(TCCC)n	70	88	101	75	110	42	44	62	61	84	107	95	160	104	156	108	168	151	136	132	98	70	93	176	65	87	75	66	73	80	78	81	68	44	79	50	53	53	24	77	75	91	47	93	96	61	86	112	61
(TCCCC)n	8	7	9	12	11	4	9	9	10	16	10	9	7	3	19	8	11	7	6	15	12	16	11	16	10	26	14	6	11	13	18	7	6	12	5	9	10	8	6	7	33	36	31	22	52	6	9	9	48
(TCCCG)n	161	263	213	233	208	101	172	196	139	199	232	275	332	183	240	178	181	278	175	247	147	160	96	308	178	133	123	147	179	119	119	159	149	73	127	108	150	103	74	136	143	170	153	164	122	199	145	178	20
(TCCG)n	2	1	1	2	0	1	2	0	1	1	5	0	2	4	0	1	5	2	1	0	1	1	0	4	1	4	1	1	4	2	0	1	0	1	3	0	0	0	1	2	1	5	6	4	1	3	4	1	2
(TCCGG)n	0	0	0	0	0	0	0	0	0	0	0	0	0	0	0	0	0	0	0	0	0	0	0	0	0	0	0	0	0	0	0	0	0	0	0	0	1	0	0	0	0	0	0	0	0	0	0	0	0
(TCCTG)n	0	0	0	0	0	1	2	1	0	0	3	1	10	0	1	1	1	1	0	0	2	0	0	1	0	0	5	4	0	1	0	0	0	0	2	0	1	0	0	0	3	3	3	5	1	3	9	4	0
(TCG)n	41	102	122	73	62	75	59	93	65	96	77	99	80	57	111	85	90	108	69	151	197	87	86	160	58	104	142	37	51	50	58	106	111	77	139	139	60	40	58	121	28	123	118	130	72	114	190	159	23
(TCGGG)n	0	0	0	0	0	0	0	0	0	0	0	0	0	0	0	0	0	0	0	0	0	0	0	0	0	0	0	0	0	0	0	0	0	0	0	0	0	0	0	2	0	0	0	0	0	0	0	0	0
(TCTA)n	40	74	69	60	59	50	33	55	48	42	55	71	101	57	92	88	146	135	88	95	49	74	55	110	39	57	55	12	30	55	43	38	48	24	58	48	38	35	41	38	40	93	76	40	61	88	57	111	105
(TCTCC)n	21	4	7	8	13	13	10	8	13	15	15	25	9	6	13	5	22	15	5	19	22	7	14	34	17	23	25	15	12	24	11	14	20	10	3	6	16	14	7	20	15	42	19	22	14	20	9	11	30
(TCTCCC)n	2	2	2	1	4	3	2	1	2	2	1	7	4	5	2	1	3	3	10	3	3	2	2	5	1	1	1	1	4	2	2	5	0	2	6	0	5	1	2	4	4	6	2	1	3	3	5	6	23
(TCTCG)n	0	0	0	0	0	0	0	0	0	0	0	0	0	0	0	0	0	0	0	0	0	0	0	0	0	0	0	0	0	0	0	0	0	0	0	0	0	0	0	0	0	0	0	0	0	0	0	0	1
(TCTCTG)n	239	331	265	356	278	164	222	224	226	339	238	352	385	183	278	312	336	349	326	344	387	316	242	475	346	391	335	213	280	296	312	290	215	173	290	220	340	198	136	277	318	503	358	358	300	405	382	453	238
(TCTG)n	487	483	758	364	215	199	264	341	259	413	394	528	1176	685	900	892	951	901	1024	419	491	428	308	703	265	426	298	178	256	275	262	279	210	174	374	272	211	106	165	323	199	537	386	266	348	427	574	434	125
(TCTTG)n	0	0	0	0	0	1	0	0	0	0	0	0	0	0	0	3	1	0	0	0	0	0	0	0	0	0	0	0	0	0	0	0	0	0	0	2	0	0	0	0	2	0	0	0	0	0	0	1	0
(TG)n	6055	7503	6440	7175	6517	3505	5350	5943	4444	6719	8164	9907	10689	5842	8670	7273	9422	8415	7887	8836	6994	7038	6218	11035	6537	6955	5663	5601	6844	6286	6167	5727	5549	3363	5962	4470	6038	4337	3039	5398	6116	10287	7239	8080	6914	7855	7649	8013	4367
(TGAA)n	6	13	7	8	14	16	9	16	5	10	7	11	36	8	15	11	26	30	18	10	11	13	15	10	21	20	2	10	13	10	7	10	7	4	7	4	14	9	4	10	13	22	10	10	12	17	9	21	12
(TGAG)n	17	51	53	27	41	27	29	29	32	40	35	78	54	49	59	63	60	60	71	58	61	56	43	63	36	43	33	22	27	25	24	18	27	14	31	32	35	15	26	26	35	76	53	33	54	43	62	50	28
(TGG)n	500	624	516	620	428	301	464	485	378	539	463	590	780	429	648	558	658	606	612	698	622	447	505	899	651	730	583	445	616	385	456	511	448	270	499	413	550	312	301	500	649	1073	781	753	541	692	715	708	721
(TGGA)n	388	443	304	550	414	187	398	352	249	419	537	712	588	353	516	474	515	523	402	634	402	425	441	718	511	435	367	435	524	339	478	323	371	194	244	217	355	241	189	317	423	589	447	580	415	417	386	382	146
(TGGG)n	267	112	136	252	183	91	178	127	111	174	314	309	281	151	272	286	390	282	201	332	350	325	404	430	201	118	97	204	235	303	175	130	137	78	114	76	270	155	114	197	332	261	213	214	221	160	186	293	45
(TGGGGG)n	50	62	34	57	57	28	31	51	31	38	47	55	63	45	52	60	68	53	42	52	56	57	55	84	53	63	27	42	42	38	41	35	29	19	20	19	63	38	29	39	33	76	44	55	48	64	46	36	21
(TTA)n	118	166	171	107	85	69	87	127	86	91	149	160	194	94	138	142	174	175	153	147	96	98	99	201	130	153	123	80	79	104	72	125	107	76	138	107	122	43	54	139	120	241	155	139	124	122	185	136	69
(TTAA)n	0	2	0	1	3	2	0	0	1	0	7	2	4	1	2	1	4	5	1	1	1	1	2	0	1	0	0	0	0	1	0	0	0	1	1	1	0	0	1	1	0	1	0	0	0	3	4	5	1
(TTAAA)n	0	0	0	0	0	0	0	0	0	0	0	0	0	0	0	0	0	1	2	0	0	0	1	0	0	0	0	0	0	0	0	0	1	0	2	0	0	0	0	0	0	2	0	1	0	0	0	0	0
(TTAAG)n	0	0	0	0	0	0	0	0	0	0	0	0	0	0	0	0	0	0	0	0	0	0	0	0	0	0	0	0	0	0	0	0	0	0	0	0	0	0	0	0	0	0	0	0	0	0	0	1	0
(TTACG)n	0	0	0	0	2	0	0	0	0	1	0	0	0	1	0	0	0	0	0	0	1	2	1	4	0	1	0	1	3	0	0	0	0	0	0	0	0	1	0	0	0	0	1	0	0	0	0	1	0
(TTAG)n	3	5	0	1	5	4	5	1	5	6	2	9	4	1	1	3	1	2	3	3	1	4	2	4	1	1	2	2	3	5	5	0	3	2	1	2	3	1	0	4	1	7	7	2	6	5	4	2	7
(TTAGGC)n	43	70	73	70	27	17	42	53	64	38	30	41	68	56	54	52	55	77	51	52	86	47	66	90	32	85	50	32	32	29	38	38	43	27	54	47	25	10	23	51	25	80	59	43	27	63	96	81	15
(TTAGGG)n	0	0	2	0	0	6	0	0	0	4	2	1	0	1	10	4	7	7	0	2	2	4	0	2	1	1	0	0	1	0	1	0	1	0	1	1	0	3	2	3	1	0	1	0	2	0	0	5	0
(TTATA)n	0	0	1	0	0	1	0	0	0	1	1	0	1	1	1	0	1	7	0	0	0	1	0	0	0	0	0	0	0	1	0	0	0	0	0	0	0	0	0	0	1	0	0	0	0	0	1	4	1
(TTATG)n	1	0	0	0	0	0	0	0	0	0	0	0	0	0	0	0	0	0	0	0	0	0	0	0	0	0	0	0	0	0	0	0	0	0	0	0	0	0	0	0	0	0	0	0	0	0	0	2	0
(TTC)n	429	447	325	341	388	279	438	543	387	482	421	522	510	265	330	330	432	269	316	494	572	462	460	814	693	809	619	536	641	463	509	515	429	303	498	381	591	285	305	551	578	1042	763	705	579	828	711	644	477
(TTCA)n	5	17	16	11	14	16	4	15	14	11	19	22	11	16	11	7	27	27	6	13	20	30	13	18	6	25	14	10	14	20	9	10	8	7	20	2	10	11	5	10	14	20	9	18	16	7	23	38	32
(TTCC)n	210	342	284	270	291	197	258	268	169	391	352	368	407	220	447	301	405	377	397	435	337	350	270	568	336	439	338	271	397	318	310	345	288	165	341	290	266	188	165	290	255	545	446	486	342	478	453	457	255
(TTCCC)n	1	0	0	0	0	2	1	0	1	3	1	3	2	0	1	3	0	2	2	2	2	4	1	1	0	0	3	1	2	4	1	2	3	1	0	1	3	0	1	1	6	5	4	4	1	1	2	3	6
(TTCCG)n	1	0	1	0	0	0	1	0	2	0	0	1	1	0	0	0	1	0	1	0	0	0	0	0	2	1	2	2	1	0	0	0	0	0	1	1	0	0	0	0	0	0	1	0	0	1	1	0	0
(TTCG)n	2	1	2	1	4	1	1	2	0	5	7	6	5	3	3	6	0	9	4	3	6	2	1	2	1	1	3	3	2	1	2	3	5	0	7	4	1	1	4	1	1	4	6	2	3	7	6	7	2
(TTCGGG)n	1	1	3	0	0	0	0	0	0	0	0	0	0	0	4	0	3	1	4	0	4	2	2	0	1	2	1	2	0	0	0	3	0	0	1	0	0	0	0	0	1	2	0	0	0	0	7	17	0
(TTCTC)n	25	27	21	17	16	15	12	21	10	16	25	17	57	19	27	33	29	27	41	23	17	17	16	27	17	38	18	18	23	10	14	20	22	9	19	22	17	8	13	25	18	43	32	18	27	49	39	27	38
(TTCTCC)n	150	248	194	238	178	129	177	237	146	172	142	211	325	219	254	237	242	230	168	225	210	171	206	353	244	270	217	143	215	150	127	138	165	96	176	137	192	129	104	189	165	304	226	246	242	335	263	237	111
(TTCTG)n	0	0	1	1	0	3	1	2	2	4	1	0	0	0	2	2	2	0	0	1	2	2	0	1	0	0	1	1	0	0	0	3	4	0	0	0	0	0	2	0	1	1	0	0	0	1	0	2	0
(TTG)n	292	325	412	261	313	257	252	259	212	359	412	549	590	301	713	491	710	588	734	662	564	578	527	645	272	314	274	221	231	304	306	290	282	183	357	242	372	286	173	337	329	545	448	451	371	475	386	538	411
(TTGG)n	28	48	39	39	47	38	25	21	40	33	40	64	50	30	68	45	51	47	37	59	60	37	40	93	37	41	35	23	38	28	38	36	27	19	39	22	40	21	17	34	30	67	32	46	51	78	38	49	33
(TTGGGG)n	1	1	5	1	1	1	2	2	3	0	1	2	0	0	0	2	0	2	0	0	2	4	0	2	0	1	2	0	2	2	1	2	2	0	1	0	3	1	1	2	2	1	4	1	0	2	0	4	46
(TTGTG)n	0	1	0	0	2	1	1	1	0	0	3	3	5	6	3	10	4	7	0	9	0	8	4	2	0	0	3	0	2	3	1	0	2	0	1	4	2	0	2	2	0	6	0	0	1	3	2	7	1
(TTTA)n	534	595	451	479	480	231	398	410	269	605	661	706	840	417	651	554	836	566	550	737	356	468	409	882	464	416	361	455	506	581	403	546	455	218	470	319	405	301	239	365	394	469	452	634	414	517	500	502	113
(TTTAA)n	11	19	56	4	33	26	21	22	13	52	64	83	59	12	81	29	94	72	82	114	63	47	39	72	5	5	5	4	5	16	22	37	22	22	28	32	18	19	12	11	13	13	22	20	20	17	52	81	3
(TTTAG)n	0	0	1	2	0	0	0	1	0	0	4	0	4	6	6	2	6	3	5	1	0	4	3	4	0	1	1	1	1	4	0	0	0	1	1	5	0	0	1	3	0	1	1	0	0	2	2	2	0
(TTTC)n	7226	8173	5928	7591	7440	4022	5996	7031	5888	7539	11787	12410	9232	4727	5895	5362	6833	5498	6642	8651	6466	7173	5383	10949	8713	10116	7944	8958	10995	9006	9988	7918	7575	4979	9152	7010	5209	3722	2958	5804	6054	10532	8286	8973	8409	9241	9262	7238	1514
(TTTCC)n	2	4	8	7	11	6	9	10	10	14	5	18	4	7	13	12	12	8	9	10	17	12	18	16	11	18	21	3	4	4	5	13	10	4	12	11	6	3	5	23	7	17	18	18	20	16	19	18	5
(TTTCG)n	0	0	0	0	0	0	0	0	0	0	0	0	0	0	0	0	0	0	0	0	0	0	0	0	0	0	0	0	0	0	0	0	0	0	0	0	0	0	0	0	0	0	0	0	0	0	0	0	1
(TTTG)n	2058	2377	2079	2038	1671	954	1494	1723	1218	1986	2353	3299	3568	1990	2956	2298	3116	2716	2529	2418	1759	1987	1659	3021	1926	1805	1592	1646	1928	1576	1805	1309	1462	774	1418	1029	1199	981	692	1151	1523	2163	1709	1730	1857	1833	1746	1968	1525
(TTTTA)n	276	292	260	153	175	126	161	232	111	240	273	298	320	155	303	216	292	226	225	277	156	247	185	297	204	185	171	140	192	167	211	171	154	121	142	152	114	66	61	120	140	194	187	228	180	254	258	248	103
(TTTTC)n	109	172	159	102	130	73	119	127	93	130	158	188	267	158	330	200	243	294	312	229	205	150	163	283	149	221	132	88	127	122	126	159	126	101	143	117	146	88	90	153	129	277	196	236	194	208	240	237	124
(TTTTG)n	1022	1139	1096	1057	1030	584	759	872	731	1068	1250	1521	1762	1085	1549	1182	1734	1478	1661	1605	1172	1358	1086	1915	740	1037	781	662	934	965	832	763	782	484	894	704	828	591	463	819	805	1331	1006	1066	1097	1306	1275	1518	920
(TTTTTA)n	60	85	63	61	56	21	46	66	40	70	103	107	121	60	77	74	117	93	107	107	54	112	69	123	49	40	33	42	41	63	69	43	63	31	58	41	50	42	20	56	47	50	75	52	63	92	61	64	15
(TTTTTG)n	711	758	712	764	681	436	534	748	550	678	789	1015	1275	756	1132	906	1179	987	1247	1081	1003	1010	871	1321	762	868	770	565	725	633	560	598	583	439	810	559	707	421	397	687	633	1217	951	995	924	1184	1178	1208	666
4.5SRNA	8	13	4	15	10	5	9	2	6	12	15	12	23	6	25	5	21	28	11	15	11	10	9	21	13	11	16	4	20	5	13	11	12	5	9	11	13	7	2	22	63	96	61	29	50	21	16	31	11
5S	188	244	197	196	177	159	216	281	230	238	206	274	308	164	272	204	258	217	208	307	371	278	222	443	180	188	155	114	155	130	163	152	139	126	128	146	263	135	164	224	196	440	288	222	274	383	296	326	170
7SK	43	42	50	55	30	20	33	41	36	28	29	27	54	22	53	42	43	47	29	38	43	36	26	86	32	44	44	24	33	60	32	27	38	22	43	46	25	24	24	34	4312	2550	2119	40	2215	34	44	32	92
7SLRNA	12	24	9	3	9	9	20	13	10	14	21	31	11	6	6	8	6	29	13	14	13	8	11	28	18	27	15	12	25	9	14	15	23	13	20	27	9	11	9	19	566	121	70	23	44	22	19	25	44
A-rich	5439	7139	5663	5285	4956	3717	5226	6363	4527	7061	7763	8861	8799	4863	7330	5839	7772	6315	7759	8427	8333	6617	5805	11291	6223	9104	7081	5428	6542	7041	5895	7576	5857	4913	8165	6168	5638	3222	3641	7015	5035	10983	9311	9634	6608	9581	10155	9412	2301
AT_rich	69368	81095	66818	55293	53100	29557	45721	59703	36449	59106	81394	89552	103908	50617	80469	60567	92534	67266	78798	81451	42981	59843	51944	96076	57059	54581	42760	43663	56423	62310	60118	55291	46359	34452	51345	43301	37414	31027	19978	34510	35055	59948	52892	62427	56711	65290	65831	62524	21758
AmnSINE1	863	1057	844	886	774	457	620	794	573	850	1104	1192	1547	838	1121	1073	1330	1079	1001	941	779	763	667	1277	899	814	742	755	841	686	866	762	656	368	760	476	608	502	412	678	879	1222	710	859	894	850	866	733	404
AmnSINE2	869	1312	751	1060	799	428	823	848	690	935	1171	1438	1645	867	1069	959	1116	925	775	984	771	757	629	1507	975	1047	867	769	917	777	789	725	670	359	714	537	675	508	333	671	714	1158	798	796	820	846	787	867	125
Arthur1	105	57	52	52	76	61	61	50	49	105	70	133	71	44	65	75	134	92	91	139	105	106	114	169	99	148	62	109	93	133	90	116	80	57	110	72	154	97	67	86	131	179	107	208	147	140	146	252	105
Arthur1A	12	13	16	11	17	13	9	5	17	13	3	12	31	17	21	19	18	17	17	13	24	20	15	13	2	10	8	3	14	16	9	7	7	5	11	8	3	5	7	6	5	19	4	3	13	6	15	25	2
Arthur1B	24	9	2	8	5	8	7	7	5	9	6	24	15	2	5	7	14	8	15	12	10	9	7	5	13	11	4	10	6	10	9	7	9	15	7	9	5	6	5	5	3	43	9	11	10	9	11	20	36
Arthur1C	0	0	2	0	1	2	0	5	1	0	0	1	17	0	0	0	3	2	0	9	4	0	1	0	0	0	6	0	0	1	0	4	1	0	0	1	0	0	0	2	3	4	2	0	0	0	0	1	1
B1F	5638	6523	5364	5862	4943	2940	4405	5338	3964	5591	6938	8796	9781	4974	6725	5959	7668	6668	6513	7148	5205	5449	4375	8788	5106	5917	4640	4093	5060	4941	4373	4284	3996	2482	4793	3372	4136	3135	2338	4369	4580	7038	5209	5100	5537	6099	6026	6180	4377
B1F1	2427	2301	2282	1940	1657	1111	1492	1746	1345	1889	2242	3016	4263	2270	3305	2897	3704	3204	3354	2678	2149	2278	1754	3357	1671	1834	1461	1232	1430	1626	1528	1422	1370	826	1629	1078	1328	958	788	1473	1524	2639	2041	1888	1914	2074	2171	2297	2141
B1F2	1149	1597	1376	1321	1193	922	1136	1398	1025	1342	1539	1878	2312	1326	1760	1499	2220	1931	1841	1910	1586	1653	1241	2452	1291	1452	1235	1006	1230	1161	1085	913	926	610	1135	820	1269	860	670	1263	1539	2444	1548	1371	1668	1747	1601	1766	1513
B1_Mm	2362	2781	2701	2260	2729	1820	2186	2562	1985	3254	3856	4634	4587	2721	4829	3749	4966	4423	5021	5545	3840	3565	3043	6075	2511	3285	2437	2091	2765	2323	2341	3105	2579	1559	2929	1923	3425	2440	1743	2873	3080	5908	5004	3753	4352	3876	4176	5362	2411
B1_Mur1	7354	9284	7115	7749	9541	4834	8801	8887	6948	10133	13070	14751	11881	6780	9977	7386	11190	9345	8699	13148	8458	8754	8493	16644	11127	10511	8946	9328	12500	8941	9644	9409	8981	5528	8506	6820	8461	7323	4794	8456	9626	13873	10314	13491	9853	11129	9530	11371	6678
B1_Mur2	3763	4545	3653	3987	3518	2425	3071	3724	2825	3834	4631	5857	6912	3448	5011	4441	5731	5435	5166	5341	4191	4017	3222	6667	3498	4138	3493	2597	3559	3740	3186	3292	2928	2035	3500	2412	2927	1961	1727	3094	3090	5106	3818	3525	3937	4363	4422	4855	2971
B1_Mur3	4142	5082	3399	4462	4497	2327	3491	3700	2980	4780	4832	6359	6548	3226	4869	4076	5789	4763	4542	5635	3948	3666	3904	7106	4193	4902	3866	3305	4204	3966	4061	3688	3809	2082	3369	2657	3653	2923	1796	3183	3199	5413	3921	4378	3438	4430	4094	5204	3010
B1_Mur4	4019	5512	4758	4070	4518	2786	3647	4336	3134	4401	5359	6241	6485	3919	5901	4692	6019	6335	4937	6059	4708	4528	3971	7354	4448	4567	3872	3807	4711	3630	3745	3301	3574	2351	3861	2857	3444	3024	2026	3771	3786	6118	4396	4928	4229	5195	4308	5430	3243
B1_Mus1	5607	7751	6449	6135	5439	3834	4999	5890	4615	6204	7013	7804	11042	5981	8324	6947	9172	8879	7768	8683	7022	6798	5849	11802	6432	7511	6059	4466	6029	5200	4852	5307	4928	3445	6077	4100	5332	4047	3324	6263	6532	10762	9223	8027	8481	8870	8389	8430	6472
B1_Mus2	3961	4843	4074	4364	3379	2859	3354	4076	3180	4538	4964	5036	7671	4137	5720	4881	6666	6001	5778	6187	4913	4512	3547	8317	4396	5716	4180	3082	4288	3918	3314	4036	3390	2452	4478	2954	3810	2803	2291	4500	4957	7916	7090	5825	6332	6409	6433	6119	4593
B2_Mm1a	3179	2694	2100	1388	1186	808	1906	1255	707	3500	2022	3174	5071	1502	3743	3650	4307	2320	1379	6778	11425	5453	9374	17479	3901	2558	1621	2017	3337	1719	3487	6258	2611	2618	6108	2770	11773	8760	10065	12594	8933	25406	31606	18719	21870	17736	23630	28218	4154
B2_Mm1t	1963	1626	1494	925	867	695	1065	812	541	2345	1433	1872	3280	1071	2465	2442	2990	1976	1237	4347	7190	3595	6377	9960	2158	1647	1044	1240	1949	1247	2215	3719	1664	1563	3698	1880	7579	5322	6425	7838	6337	17620	21817	11285	13570	10911	15415	17761	3129
B2_Mm2	3963	3860	3368	3214	2589	2180	2567	2943	2088	3630	3770	4372	6875	3024	5302	4352	7429	6588	4647	5444	4939	4070	4588	7979	3260	3448	2527	2070	2849	2871	2777	3452	2375	1905	3800	2121	4372	3117	3199	4191	5980	9354	11108	6127	9127	6141	8014	10287	7868
B3	15642	17783	13849	13599	12310	8455	11849	14380	10275	15614	18162	25233	23455	12472	18005	15461	21114	18677	16911	17312	13214	13947	11430	21648	14916	15999	12862	11755	15403	12601	12883	12836	10652	7253	12717	8774	10297	7569	6168	11335	12880	19009	14123	14873	14744	15209	16621	16741	17343
B3A	5465	6239	5314	5588	5565	3680	4584	5059	4053	6146	6891	8274	9526	5150	7453	6584	9470	8486	7751	8197	6403	6495	5689	10795	5949	6585	5166	4408	5752	5315	5018	5314	4396	2843	5250	3469	5216	3742	2649	4764	5469	8826	6183	7307	5857	6657	7015	8377	7048
B4	3193	3868	2979	3168	2868	2165	2699	3108	2521	3402	3829	4566	5447	2820	4167	3719	5161	5077	4516	4610	3904	3816	2980	5432	3375	3831	3263	2344	3128	2770	2998	2824	2375	1551	2935	1950	2734	1982	1501	2786	3394	5516	3367	3570	3841	3901	4020	4788	3791
B4A	4004	4735	3897	4223	4472	3034	3572	4003	3545	4767	5192	6443	8281	4562	6467	5433	8193	8022	6193	7439	5588	5520	5000	8680	4382	5141	4248	3549	4422	4507	3708	3823	3394	2246	4030	2886	4551	3209	2214	4294	5380	7969	5619	5755	5535	6279	6220	7926	5253
BC1_Mm	1754	2068	1566	1666	1704	1213	1532	1969	1190	2002	2360	3949	2639	1388	2183	1815	2403	1946	1933	2472	2017	2383	1764	2952	1694	1562	1325	1452	1694	1749	1807	1444	1225	971	1274	1152	1552	1102	1048	1516	1472	2401	1728	1771	1559	2176	1712	1925	496
BGLII	620	697	581	703	960	656	790	1025	735	873	746	1251	1162	644	1086	1085	1115	1019	933	1482	1443	1437	1227	2166	899	875	779	504	755	625	953	733	656	564	660	539	1224	611	570	1066	908	1516	1266	1345	1061	1418	1184	1760	671
BGLII_A	1	19	12	15	27	38	10	10	7	25	19	26	20	14	25	17	39	38	25	25	23	24	34	82	14	16	6	7	6	12	14	20	6	3	22	5	16	8	12	17	35	31	12	18	23	8	36	50	16
BGLII_B	15	20	23	11	30	100	36	41	28	45	32	54	40	28	46	27	81	61	34	49	71	35	34	48	52	58	59	38	29	40	45	38	45	16	37	22	48	20	19	36	35	81	62	37	82	58	21	126	45
BGLII_B2	179	107	102	141	132	85	135	145	91	156	211	225	177	139	163	193	213	167	187	174	135	166	132	213	134	119	79	151	143	126	114	79	101	54	85	93	106	73	51	83	106	83	93	120	124	129	75	125	36
BGLII_C	10	23	4	1	8	20	29	17	44	45	32	19	6	4	2	2	11	9	4	33	21	17	5	42	20	62	48	18	19	20	22	56	19	35	30	17	25	4	21	31	9	40	28	53	41	39	37	32	10
BGLII_Mur	2	6	23	5	0	49	1	21	3	1	13	2	10	2	25	6	28	51	6	22	23	11	4	9	7	4	8	1	0	11	9	7	3	1	11	9	11	7	0	2	5	21	3	9	11	19	6	40	23
BGLII_Mus	23	48	37	47	36	49	46	43	37	39	36	65	93	98	124	69	111	100	85	56	68	92	87	104	34	39	30	35	45	30	22	22	25	9	29	32	71	40	26	44	41	96	66	46	46	54	42	92	27
BLACKJACK	10	18	4	7	4	23	36	17	18	15	21	50	45	21	33	24	51	43	57	17	27	40	4	9	4	12	12	9	12	25	6	12	14	8	10	18	13	6	6	16	9	14	11	20	19	10	23	53	131
C-rich	871	1157	985	895	880	683	813	869	645	1082	1149	1306	1413	813	1380	1064	1318	1253	1301	1340	1269	1140	1126	1702	882	1047	897	677	932	680	863	883	785	560	838	623	969	622	548	987	1003	1734	1060	1100	1029	1186	1105	1333	794
C573_MM	0	0	0	0	0	0	0	0	0	0	0	0	0	0	0	0	0	10	0	0	0	0	0	1	0	0	0	0	0	0	0	0	0	0	0	0	0	0	0	0	0	1	0	0	0	0	0	4	0
CR1_Mam	98	166	89	164	72	55	82	92	60	72	96	187	155	101	119	81	136	130	89	92	66	71	71	115	92	76	55	64	81	94	88	63	63	38	73	58	58	32	26	54	71	143	75	58	75	76	119	100	150
CT-rich	5077	7000	6348	6157	5034	4388	5773	7850	6334	8066	7103	7518	7591	4200	7141	5905	6568	6107	7629	8323	9863	6765	6035	12444	8451	13174	10104	5651	8337	6866	6248	8350	6381	5116	10386	6487	6807	3494	4539	9103	5711	14068	9798	11073	7555	11482	12335	11260	5323
CYRA11_Mm	4	1	5	2	5	6	3	2	5	1	6	3	3	2	4	2	11	19	5	3	5	5	3	5	0	1	3	0	2	1	4	0	4	1	3	1	4	2	1	1	3	7	7	7	2	4	2	5	5
Chap1_Mam	39	92	36	36	28	27	35	53	33	37	40	45	82	18	19	31	55	31	16	35	27	29	13	42	42	35	33	24	36	35	55	37	13	18	26	24	16	8	18	28	33	36	21	27	35	33	22	30	56
Charlie1	113	101	54	76	109	55	77	95	66	127	94	121	125	77	62	75	132	119	112	100	108	98	90	177	76	123	122	71	94	93	104	97	85	55	104	32	68	41	28	91	63	87	72	57	105	151	89	113	45
Charlie10	143	93	26	56	36	15	40	41	56	71	36	60	94	43	57	40	44	42	17	45	13	32	22	115	34	58	32	19	15	53	37	34	37	6	26	11	24	10	16	18	19	41	17	19	33	44	60	70	18
Charlie10a	0	0	2	1	0	1	0	1	1	0	1	2	5	0	2	0	0	0	0	1	0	1	2	0	0	1	0	0	0	0	0	0	0	0	3	0	0	2	0	1	1	5	0	0	2	2	2	0	0
Charlie10b	0	0	0	0	0	0	0	0	0	0	0	0	0	0	0	0	0	0	0	0	0	0	0	0	0	0	0	0	0	0	0	0	0	0	0	0	0	0	0	0	0	0	0	1	0	0	0	1	0
Charlie11	36	36	46	54	21	17	23	31	27	29	27	51	84	62	61	46	45	58	40	18	16	31	16	45	12	19	11	14	16	22	10	13	14	7	8	3	8	4	7	14	3	9	8	10	23	15	17	17	44
Charlie12	12	12	15	18	6	15	14	9	7	13	17	30	31	11	12	14	25	25	13	22	12	8	16	20	25	12	15	14	10	8	4	7	8	1	8	2	10	1	7	7	3	11	5	9	5	13	5	16	64
Charlie13a	13	19	1	13	27	7	6	15	11	19	8	18	14	17	10	5	19	23	7	7	11	6	23	2	18	13	11	10	9	13	5	10	8	10	4	1	10	4	6	2	10	11	10	18	18	8	18	11	7
Charlie13b	0	0	0	1	3	0	0	2	0	0	0	0	0	1	0	2	0	4	0	2	0	0	1	5	0	0	0	1	0	0	1	0	0	0	0	0	0	0	1	1	0	0	0	0	3	0	5	3	0
Charlie14a	0	0	1	0	5	1	1	1	1	4	1	4	3	3	2	0	2	3	2	1	1	2	3	3	0	3	0	6	0	3	0	0	1	2	1	0	1	5	1	1	4	7	0	3	3	4	0	4	2
Charlie15a	5	10	8	9	6	5	4	5	13	7	20	3	24	7	13	8	18	10	17	6	5	2	3	13	1	15	12	4	2	11	1	6	8	1	10	12	1	0	8	0	2	3	5	1	9	9	13	11	4
Charlie15b	15	26	27	29	17	12	22	8	22	25	45	11	82	15	33	27	22	38	32	14	33	18	16	48	22	14	30	16	34	22	18	21	13	12	22	15	7	12	4	30	16	40	14	11	21	18	32	39	98
Charlie16a	100	108	90	122	114	59	60	79	58	121	134	174	179	81	123	98	123	108	75	167	119	112	88	216	133	102	80	99	174	134	107	96	73	51	77	85	166	99	81	92	103	148	161	209	134	162	125	191	17
Charlie17	10	4	2	11	1	4	7	4	4	1	2	6	1	3	3	0	4	2	1	5	2	1	0	2	10	8	4	3	10	18	4	7	5	2	4	2	0	1	1	0	6	1	4	2	0	8	0	0	2
Charlie17a	1	4	3	0	1	3	1	6	7	7	5	6	6	1	2	6	4	2	6	3	10	2	3	6	3	10	4	3	3	1	8	7	5	3	7	2	2	2	2	5	1	5	7	6	8	3	9	4	1
Charlie17b	0	7	25	13	23	10	17	8	17	14	22	23	24	7	11	27	25	25	33	16	19	11	16	35	10	7	12	6	11	12	24	14	13	1	15	1	17	16	5	5	8	29	10	21	28	14	16	14	16
Charlie18a	218	229	148	211	165	82	115	147	97	228	226	213	316	151	204	173	255	169	175	180	108	124	112	258	214	247	177	152	195	209	203	160	112	85	192	98	125	101	65	104	119	233	177	186	109	189	173	186	40
Charlie19a	36	14	18	20	39	12	14	17	15	25	23	31	23	16	6	8	32	16	15	32	7	9	10	12	33	8	8	12	14	17	8	20	16	7	17	6	24	4	10	11	35	16	11	20	23	7	15	17	20
Charlie1a	642	680	618	708	543	256	459	512	316	530	727	869	1211	461	857	648	994	657	689	576	470	530	461	783	367	431	362	361	531	569	338	358	322	189	318	281	328	220	141	255	274	515	331	337	383	440	439	547	250
Charlie1b	94	86	104	76	102	26	60	75	48	72	112	128	228	79	108	105	175	139	102	135	72	91	36	149	61	77	82	44	60	150	82	80	73	35	93	52	69	25	25	84	79	89	75	69	67	63	108	79	124
Charlie20a	0	2	0	4	8	4	0	1	1	6	5	2	5	2	2	5	11	1	7	7	7	5	2	6	4	4	2	5	9	2	5	0	0	3	1	2	4	1	4	0	13	4	2	8	2	8	8	6	19
Charlie21a	42	13	26	7	8	2	14	11	7	19	11	13	22	15	22	12	29	23	28	10	5	13	5	13	8	2	1	5	9	5	10	14	2	5	3	5	5	6	5	2	2	7	4	12	8	11	9	7	26
Charlie22a	67	91	82	55	65	39	57	66	39	55	75	110	98	34	78	56	76	91	82	114	107	92	50	125	62	60	34	47	55	56	70	51	52	30	28	28	44	40	20	44	37	61	45	63	70	76	69	61	16
Charlie23a	0	0	5	4	0	2	1	0	2	3	2	0	3	0	0	3	0	6	1	0	0	6	0	3	0	1	0	0	1	2	0	1	0	5	1	0	0	0	0	1	0	0	0	2	0	9	0	2	7
Charlie24	176	173	156	169	92	78	93	179	118	102	158	149	131	150	205	164	167	78	121	122	179	95	112	147	105	97	107	93	119	107	100	152	92	58	140	85	67	47	28	66	129	198	126	83	103	93	137	132	150
Charlie25	2	0	3	4	9	1	0	8	0	6	0	4	0	0	4	8	11	11	7	5	11	13	0	15	0	7	4	6	5	4	4	0	0	3	3	3	0	1	2	13	1	3	2	2	0	1	2	8	3
Charlie26a	0	0	6	1	1	4	2	5	1	2	2	6	2	1	0	6	2	2	15	1	1	3	0	1	3	0	2	1	2	0	1	3	3	0	4	1	0	0	1	4	4	10	0	0	0	0	4	4	19
Charlie29a	6	8	0	3	6	5	6	7	2	0	6	5	7	0	3	5	2	6	5	2	2	8	2	2	6	2	5	3	0	10	2	1	1	3	2	3	9	1	0	7	6	17	1	11	8	3	4	5	12
Charlie2a	31	37	50	17	18	14	22	34	13	26	25	38	94	72	112	46	62	76	95	49	37	22	23	39	13	13	16	13	15	29	18	16	15	9	32	21	32	13	15	18	24	26	29	15	53	37	39	44	22
Charlie2b	205	153	192	111	126	71	101	110	104	114	190	157	216	180	260	191	279	186	225	156	194	157	140	205	119	152	94	64	85	109	98	101	81	53	122	67	117	40	55	86	99	225	115	120	121	146	205	161	147
Charlie4	4	5	0	1	5	1	5	3	0	5	8	7	10	3	3	0	4	9	1	1	1	2	5	3	4	3	0	5	6	5	0	0	0	1	3	0	10	10	0	6	3	13	6	2	0	5	10	4	0
Charlie4a	64	56	33	36	69	46	31	41	32	50	67	94	100	37	50	49	84	58	70	73	37	36	21	72	66	55	70	45	44	42	45	49	26	13	50	29	32	23	17	25	33	50	37	57	35	59	44	53	108
Charlie4z	8	11	21	25	13	10	8	14	14	7	31	26	29	13	11	19	32	23	17	28	11	13	28	41	28	18	19	18	35	22	7	17	10	14	23	5	11	12	9	10	15	10	31	21	14	18	20	22	22
Charlie5	823	743	843	1108	788	367	532	911	571	760	989	1195	2265	1054	1405	1144	2017	1038	1560	935	667	991	868	1386	689	659	616	480	664	572	623	556	484	351	652	449	584	532	230	340	363	826	443	472	622	677	802	790	273
Charlie6	241	529	400	328	323	230	287	454	282	440	359	718	377	238	347	302	307	296	219	448	405	330	283	525	334	383	294	284	253	207	265	273	350	230	267	227	298	220	169	313	342	531	301	286	373	418	355	421	35
Charlie7	133	136	97	101	76	47	59	70	61	72	113	143	132	54	127	63	94	113	93	102	51	53	48	91	49	71	32	66	44	100	72	90	56	53	114	50	31	32	18	54	34	51	59	59	21	70	66	61	47
Charlie7a	11	0	6	9	7	3	1	9	5	1	8	4	4	12	3	3	9	4	7	10	5	7	7	3	3	1	2	2	1	7	4	1	5	4	5	1	0	1	0	0	6	6	2	5	2	3	2	1	7
Charlie8	100	164	111	87	47	48	79	58	78	113	149	138	77	55	92	86	100	127	139	102	119	36	38	121	165	164	139	62	127	67	71	99	72	11	86	64	73	33	41	50	170	260	95	113	167	100	92	113	446
Charlie9	58	58	70	54	47	33	42	72	57	79	60	39	77	10	26	28	37	42	61	94	56	35	9	96	59	111	89	20	89	38	41	100	69	32	108	33	35	24	18	65	39	103	62	74	87	94	97	77	28
Cheshire	358	307	313	343	292	117	236	201	152	242	293	353	482	262	396	288	516	340	466	336	214	303	221	490	282	262	246	196	248	288	213	305	190	131	201	188	239	182	98	198	199	241	199	241	236	288	280	354	140
Cheshire_Mars	0	0	0	0	0	0	0	0	0	0	0	0	0	0	0	0	0	0	0	0	0	0	0	0	0	0	0	0	0	0	0	0	0	0	0	0	0	0	0	0	0	0	0	0	0	0	0	0	0
Cheshire_Mars_	0	0	0	0	0	0	0	0	0	0	0	0	0	0	0	0	0	0	0	0	0	0	0	0	0	0	0	0	0	0	0	0	0	0	0	0	0	0	0	0	0	0	0	0	0	0	0	0	0
DNA1_Mam	0	0	0	3	1	0	0	0	0	0	0	1	0	0	0	0	0	2	0	0	0	1	0	0	0	0	3	0	0	1	0	0	0	0	0	1	0	0	0	0	0	3	0	1	0	0	0	4	0
ERV3-16A3_I-int	40	58	49	17	35	15	14	33	16	22	27	67	77	49	52	38	45	84	46	42	29	44	19	38	5	25	5	22	28	16	7	8	22	3	19	8	18	12	14	5	18	28	6	10	24	15	17	35	58
ERV3-16A3_LTR	9	2	0	2	2	4	1	5	8	7	4	6	10	1	16	6	14	16	7	15	18	15	5	19	7	2	0	2	5	3	10	2	3	0	4	2	6	4	8	3	2	2	5	2	3	11	20	13	23
ERVB2_1-I_MM-int	0	4	3	17	0	3	1	0	1	1	12	6	7	2	0	1	4	5	5	1	1	4	2	1	3	4	0	4	2	4	2	5	2	1	6	0	0	5	0	2	5	2	0	4	0	1	8	9	4
ERVB2_1A-I_MM-int	21	36	17	13	7	17	12	19	9	11	22	17	47	20	18	30	39	46	32	32	28	27	12	21	16	16	14	6	9	28	12	20	15	10	18	11	16	7	11	15	15	17	14	29	38	28	24	33	108
ERVB3_1-I_MM-int	16	31	12	8	15	25	11	21	27	26	16	64	46	2	23	31	40	23	57	78	38	23	13	53	22	20	29	17	24	27	10	18	17	8	21	8	17	14	11	18	26	26	44	31	33	29	13	19	183
ERVB3_1-LTR_MM	2	2	6	6	2	21	2	2	3	2	7	5	14	1	3	5	13	14	6	1	3	4	0	4	12	8	15	2	2	6	0	5	4	1	3	5	1	1	4	6	5	4	4	10	1	8	2	18	12
ERVB4_1-I_MM-int	37	45	30	41	36	36	49	32	41	33	32	54	48	13	33	38	66	35	42	62	49	34	19	76	38	55	39	30	33	32	30	52	20	19	45	34	53	33	39	47	33	77	27	39	43	27	69	76	69
ERVB4_1-LTR_MM	0	0	0	0	0	0	0	0	0	0	0	0	0	0	0	0	0	0	0	0	0	0	0	0	0	0	0	0	0	0	0	0	0	0	0	0	0	0	0	0	0	0	0	0	0	0	0	1	0
ERVB4_1B-I_MM-int	262	379	393	417	460	202	310	376	316	435	494	606	763	186	381	296	579	349	471	381	343	348	218	484	229	346	286	278	325	327	333	259	300	172	357	259	175	172	159	184	273	412	205	264	293	309	576	485	446
ERVB4_1B-LTR_MM	198	275	219	177	239	125	171	230	182	230	325	336	336	144	286	198	263	211	174	324	266	203	152	324	238	300	230	227	235	176	197	250	192	126	195	177	240	158	102	185	213	356	217	404	287	282	287	334	277
ERVB4_1C-LTR_Mm	110	117	118	168	145	58	105	113	80	152	151	200	232	39	79	59	179	84	91	89	55	85	45	156	77	129	92	121	158	136	124	86	90	48	133	54	56	49	50	47	87	80	26	56	68	52	141	144	189
ERVB4_2-I_MM-int	42	34	40	48	25	17	18	24	27	15	69	21	61	17	23	27	49	40	43	21	59	55	11	29	36	24	24	30	33	12	21	26	17	24	25	16	35	5	12	44	38	88	29	28	71	43	74	75	119
ERVB4_2-LTR_MM	16	19	7	15	19	7	4	15	6	13	13	19	9	7	8	6	14	12	21	12	11	8	6	15	13	20	19	7	22	20	17	12	12	2	14	12	18	11	2	21	23	125	28	24	38	15	36	36	267
ERVB4_3-I_MM-int	0	0	0	0	0	0	0	1	0	0	0	4	13	0	0	2	3	6	2	0	0	7	0	0	0	14	0	0	0	0	0	0	0	0	0	0	5	0	1	1	0	14	1	1	7	0	6	2	11
ERVB4_3-LTR_MM	406	600	336	570	528	256	502	398	370	446	579	555	883	370	489	455	493	406	450	636	384	443	397	873	566	558	431	456	454	410	498	533	408	272	343	289	363	296	233	355	383	485	481	683	600	384	587	572	45
ERVB5_1-I_MM-int	8	16	10	19	16	16	12	15	25	27	19	3	13	19	22	13	30	30	16	37	35	13	10	20	29	42	35	33	10	23	19	19	25	10	54	19	10	5	19	51	54	50	9	28	10	46	38	18	88
ERVB5_1-LTR_MM	0	1	2	2	1	0	2	0	2	1	1	0	0	7	4	1	2	8	1	2	6	3	1	1	1	1	2	0	1	2	1	0	0	1	1	3	1	1	0	0	1	4	0	0	1	0	1	8	10
ERVB5_2-LTR_MM	6	11	12	1	4	4	5	8	2	8	12	8	11	11	14	7	5	24	8	15	13	10	7	7	11	7	11	9	3	6	3	7	6	10	9	5	9	2	7	13	25	20	13	15	20	20	16	16	24
ERVB7_1-LTR_MM	36	62	72	22	89	74	33	33	35	83	82	75	40	19	25	49	115	68	69	71	29	63	44	87	30	64	34	44	95	33	45	32	37	42	45	18	57	51	26	45	90	69	35	73	48	80	120	146	212
ERVB7_2-LTR_MM	90	113	86	117	106	84	104	132	93	89	60	131	179	85	172	139	190	153	148	149	190	145	123	227	89	89	84	56	58	63	94	73	52	54	67	58	167	84	78	139	107	162	143	139	144	187	149	179	146
ERVB7_2B-LTR_MM	12	15	1	4	16	16	7	11	12	12	12	20	23	16	7	21	27	42	17	16	17	21	11	15	12	12	11	13	9	8	16	21	11	9	11	11	7	9	3	17	12	19	8	14	22	9	20	17	112
ERVB7_3-LTR_MM	5	5	13	8	16	44	6	14	6	22	10	12	8	5	9	15	33	31	7	16	15	16	12	20	9	19	15	17	9	14	10	11	11	5	10	4	9	15	5	13	12	21	11	18	6	18	10	33	20
ERVB7_4-LTR_MM	3	0	2	7	9	22	8	0	6	7	6	4	6	2	0	6	18	17	5	5	7	3	4	7	4	4	9	5	1	7	7	16	2	4	4	1	3	6	2	3	4	12	4	10	5	1	0	36	14
ERVL-B4-int	16	52	26	12	25	27	34	28	14	30	31	34	56	13	34	17	66	74	26	31	17	28	20	36	55	26	31	24	18	24	11	15	31	15	8	22	31	21	21	43	49	93	46	38	43	28	62	61	194
ERVL-E-int	132	139	74	92	92	94	123	114	98	98	121	184	136	59	112	69	115	132	61	111	149	134	83	205	249	258	218	153	282	78	234	187	141	79	144	95	119	71	89	97	235	346	209	224	261	140	176	154	60
ERVL-int	2	1	12	0	0	6	5	1	3	6	3	10	16	1	15	0	7	9	21	7	3	0	5	0	7	7	4	0	0	5	14	1	5	0	6	2	0	3	2	6	5	12	2	2	1	1	7	10	17
ETnERV-int	15	40	111	13	187	144	46	34	62	69	120	71	20	13	33	24	157	182	111	63	46	79	54	100	40	46	38	48	103	28	14	20	39	23	26	14	46	40	27	61	69	45	26	45	34	90	75	227	252
ETnERV2-int	141	127	157	122	99	137	119	144	96	138	182	210	236	77	141	111	203	154	149	185	134	129	111	224	138	223	210	81	154	132	110	130	110	97	208	104	133	74	68	128	122	220	180	193	170	208	277	348	109
ETnERV3-int	129	207	97	118	128	85	160	157	70	133	193	130	186	105	75	95	158	141	202	155	132	162	113	142	104	98	75	51	140	99	88	100	62	62	143	76	99	43	65	70	118	75	123	79	72	158	185	140	410
Eulor1	0	0	0	0	0	0	0	0	0	0	0	0	0	0	0	0	1	1	0	0	0	0	0	0	0	0	0	0	0	0	0	1	0	0	0	0	0	1	0	0	0	0	1	0	2	0	1	0	0
Eulor10	2	3	1	6	1	0	2	1	1	3	6	5	5	3	3	1	3	5	2	5	3	3	0	4	2	7	0	4	3	3	3	1	2	0	2	3	5	2	1	1	4	2	3	1	3	6	1	1	2
Eulor11	0	0	0	0	0	0	0	0	0	0	0	0	0	0	1	0	0	0	1	0	0	0	0	0	0	0	0	2	0	0	0	0	4	0	0	0	0	0	0	0	0	0	3	0	3	2	0	1	0
Eulor12	0	0	0	0	0	0	0	0	0	0	0	0	0	0	0	0	1	1	0	0	0	0	0	1	0	0	0	0	0	0	0	0	0	0	0	0	0	0	0	0	0	0	0	0	0	0	0	1	0
Eulor2A	6	0	0	0	0	1	0	0	0	0	0	2	0	1	0	1	0	0	0	1	0	2	0	0	1	0	0	0	0	0	0	0	0	0	1	0	2	0	0	0	2	0	1	0	1	1	0	1	13
Eulor2B	90	90	44	96	68	31	55	45	57	74	89	130	114	49	69	71	70	86	36	91	59	71	47	118	88	105	44	46	63	53	61	36	49	17	44	30	49	49	20	39	60	77	58	58	87	92	53	49	51
Eulor2C	0	0	0	0	0	0	0	0	0	0	0	0	0	0	0	0	0	0	0	0	0	0	0	0	0	0	0	0	0	0	0	0	0	0	0	0	0	0	0	0	0	0	0	0	0	1	0	1	0
Eulor3	0	1	0	0	0	0	0	0	1	0	0	0	0	0	0	0	0	1	0	1	0	2	0	0	1	1	0	0	0	0	0	0	0	0	0	0	0	0	0	0	1	1	0	0	0	0	0	0	1
Eulor4	0	0	0	0	0	0	0	0	0	0	0	0	0	0	0	0	0	0	0	0	0	0	0	0	0	0	0	0	0	0	0	0	0	0	0	0	0	0	0	0	0	0	0	0	0	0	0	1	0
Eulor5A	85	112	86	111	79	58	82	76	65	91	71	105	145	96	131	97	126	144	58	100	94	88	90	138	93	87	93	66	70	55	67	44	45	31	47	34	88	52	33	51	79	105	131	78	92	91	106	92	91
Eulor5B	0	2	0	0	2	1	0	2	2	2	5	2	3	5	5	8	4	5	1	2	5	2	1	1	2	0	1	0	4	4	0	0	1	1	4	3	5	0	8	0	0	10	1	1	6	0	13	0	0
Eulor6A	0	0	0	0	0	0	0	0	0	0	0	0	0	0	0	0	0	0	0	0	0	0	0	0	0	0	0	0	0	0	0	0	0	0	0	0	0	0	0	0	0	0	0	0	0	0	0	0	0
Eulor6B	0	3	2	3	6	0	5	4	1	4	10	14	11	3	1	12	4	7	8	9	5	7	2	8	3	4	3	5	1	6	1	4	0	2	5	3	0	4	0	2	4	1	8	7	4	12	4	0	0
Eulor6C	3	1	1	0	2	0	3	1	3	2	2	2	6	0	2	0	7	0	1	3	0	3	9	1	10	5	2	2	6	3	9	0	0	1	1	2	5	0	2	0	1	4	1	3	0	6	4	8	0
Eulor6D	0	0	0	0	0	0	0	0	0	0	0	0	4	0	0	0	1	1	0	0	1	0	0	4	0	6	1	0	0	0	0	0	0	0	0	0	4	0	0	0	0	0	0	0	0	0	0	2	0
Eulor6E	0	0	0	0	0	0	0	0	0	0	0	0	0	0	0	0	0	0	0	0	0	0	0	0	0	0	0	0	0	0	0	0	0	0	0	2	0	0	0	0	0	0	0	0	0	0	0	0	0
Eulor8	8	14	7	1	1	6	5	7	2	13	0	0	10	9	5	2	8	9	4	8	2	3	2	9	3	7	6	4	5	9	2	9	7	0	3	0	4	2	7	5	5	7	15	15	2	16	1	3	9
Eulor9A	0	0	0	0	0	3	0	0	0	0	0	0	0	0	0	0	5	1	0	0	0	0	0	0	0	0	0	0	0	0	0	0	0	0	0	0	0	0	1	0	0	0	0	0	0	0	0	4	0
Eulor9C	0	0	0	0	0	0	0	0	0	0	0	0	0	0	0	0	1	0	0	2	0	0	0	0	0	0	0	0	0	0	0	0	1	0	0	0	1	0	0	0	0	0	0	0	0	0	0	0	0
FAM	52	34	18	24	80	32	68	66	61	71	112	139	74	22	32	22	40	19	36	80	67	65	64	113	76	75	75	100	80	75	67	85	48	32	59	37	81	51	38	48	69	96	68	69	50	67	48	76	22
FordPrefect	0	3	20	0	9	7	1	3	6	12	4	7	12	10	1	6	57	34	8	11	16	12	3	8	1	8	9	9	3	10	3	4	3	0	6	12	2	4	2	1	10	12	8	7	0	10	1	11	67
FordPrefect_a	0	0	0	0	0	0	0	0	0	0	0	0	0	0	0	0	0	1	0	0	0	0	3	0	0	0	0	0	0	0	0	0	0	0	0	0	0	0	0	0	0	0	0	0	0	0	0	0	0
G-rich	1812	2400	1805	1735	1541	1037	1557	1947	1371	2113	1937	2427	2837	1364	2025	1696	1982	1841	1778	2072	1906	1560	1255	2729	2072	2804	2154	1510	2077	1601	1734	1976	1602	1095	2118	1449	1497	885	913	1741	1584	3031	1818	2056	2041	2211	2510	2126	932
GA-rich	6578	9854	7835	7702	7112	6122	8355	11397	8737	11126	10587	10972	10409	5094	8033	7421	8045	7013	8005	11128	12484	8136	6897	16472	12827	18829	15318	8932	12213	10740	9250	12458	9764	7486	14989	9641	9366	4469	6409	12360	8977	18637	14212	16927	10760	16076	16129	13691	4410
GC_rich	618	666	621	485	426	335	457	509	400	600	656	781	750	470	813	718	775	836	667	788	852	503	623	1047	542	688	590	490	520	493	559	528	508	410	489	538	469	358	366	531	597	830	681	653	425	559	672	690	536
GSAT_MM	4	14	21	11	1	268	2	5	6	4	12	2	12	32	20	33	982	603	10	10	31	8	7	30	16	6	3	2	5	15	0	1	1	2	3	3	13	8	12	23	109	74	135	54	73	19	15	772	395
HAL1	216	256	519	186	373	308	283	282	301	456	567	778	613	226	607	458	667	571	710	742	909	445	253	709	192	371	246	169	237	293	270	400	245	189	394	246	235	219	161	374	325	363	322	286	321	300	507	832	184
HAL1M8	10	3	18	11	9	8	3	5	6	5	21	15	14	16	31	11	23	18	17	10	20	20	18	35	0	3	14	7	4	2	16	19	7	3	12	6	10	6	5	1	8	2	19	20	7	24	17	36	23
HAL1ME	66	99	85	84	106	66	117	105	106	119	170	103	209	77	96	120	143	101	130	122	119	152	105	189	216	266	224	83	183	91	68	125	84	63	116	88	135	74	49	122	158	329	168	175	171	132	182	186	387
HAL1_SS	5	2	5	3	8	9	9	10	8	18	20	14	11	4	6	1	5	3	11	34	47	20	13	36	11	25	5	7	15	21	16	53	28	19	42	22	18	9	8	22	10	24	45	22	11	26	45	32	6
HAL1b	58	77	71	80	51	49	75	63	60	87	116	127	148	54	78	81	128	87	140	153	112	65	33	118	67	117	69	38	72	96	75	103	79	56	94	112	69	36	33	87	61	92	106	122	94	89	92	105	9
HERV16-int	0	0	4	0	0	3	0	0	2	0	2	4	7	2	5	0	8	9	2	0	1	0	2	2	3	3	3	1	2	0	2	3	1	1	1	8	1	1	3	0	3	5	7	2	0	1	3	5	1
HERVL40-int	284	258	436	144	128	126	143	167	144	274	220	202	606	486	892	938	874	759	965	556	455	397	339	470	181	208	137	88	94	119	195	142	169	112	199	85	211	87	116	243	272	578	379	195	307	220	220	233	1885
HERVL74-int	0	0	2	1	2	4	10	0	4	0	0	0	2	0	0	1	5	9	1	3	5	2	5	4	0	0	1	4	8	2	0	1	0	1	1	0	0	3	0	2	0	0	0	0	4	0	0	5	0
HY1	0	0	0	0	0	0	0	0	0	0	0	0	0	0	0	0	1	0	0	0	0	0	0	1	0	0	0	0	0	0	0	0	0	0	0	0	0	0	0	0	0	0	0	0	0	0	0	0	5
HY3	0	0	0	0	0	0	0	0	0	0	0	0	0	0	0	0	1	1	0	0	0	0	0	0	0	0	0	0	0	0	0	0	0	0	0	0	0	0	0	0	0	0	0	0	0	0	0	1	0
HY4	0	0	0	0	0	0	0	0	0	0	1	0	0	0	0	0	0	0	0	0	0	0	0	0	0	0	0	0	0	0	0	0	0	0	0	0	0	0	0	0	0	0	0	0	0	0	0	0	0
Helitron1Na_Mam	0	0	10	0	0	0	3	2	1	1	1	1	2	0	0	0	0	3	0	3	0	0	1	4	0	2	1	1	0	2	2	0	0	0	3	0	3	0	1	1	0	0	0	0	6	1	2	0	0
Helitron1Nb_Mam	1	4	4	7	3	0	1	0	5	1	5	2	1	0	0	0	1	4	0	0	7	0	3	4	0	10	0	0	3	5	1	4	2	0	4	0	6	0	2	0	0	16	3	3	2	6	8	6	0
Helitron2Na_Mam	4	1	0	1	0	1	0	0	0	1	7	0	0	3	5	0	1	5	0	0	0	0	0	1	1	0	0	0	0	0	0	0	3	0	0	0	0	0	0	0	0	1	0	1	2	1	0	2	1
Helitron3Na_Mam	25	19	18	34	10	15	25	30	30	21	15	17	43	17	16	5	16	11	21	20	20	7	13	26	55	88	57	16	37	14	24	22	21	11	14	14	21	12	9	29	45	136	55	35	46	30	32	35	136
IAP-d-int	196	473	581	277	624	325	366	302	279	430	378	709	185	274	448	257	787	568	458	911	713	614	554	817	420	281	372	235	418	369	389	464	396	278	305	220	391	294	333	701	1283	521	435	939	650	745	1133	1089	201
IAP1-MM_I-int	242	941	664	296	271	433	443	740	645	718	738	576	703	297	420	405	440	483	690	631	795	412	271	1007	461	1331	882	350	505	784	336	866	443	465	1142	613	461	158	303	681	360	1174	698	635	704	1094	1582	1102	350
IAP1-MM_LTR	0	7	0	0	1	5	0	4	1	1	4	1	3	0	0	1	4	9	1	0	1	1	1	6	2	1	2	3	0	1	2	1	1	3	3	0	3	3	1	0	5	8	1	3	4	5	4	3	78
IAPA_MM-int	0	0	0	1	0	1	0	0	0	0	0	0	1	0	0	0	1	2	0	0	0	0	1	0	0	0	0	2	1	2	0	0	2	0	1	0	1	0	0	1	0	3	1	0	1	0	1	3	3
IAPEY2_LTR	38	40	48	40	45	12	37	21	27	30	45	25	31	16	41	60	49	41	46	20	24	36	35	50	49	55	35	51	45	60	32	25	42	16	33	24	41	14	11	25	37	49	35	46	17	25	40	55	151
IAPEY3-int	89	136	118	165	215	83	166	203	118	134	189	242	98	38	85	118	138	156	61	68	59	107	73	177	152	179	104	115	172	159	190	68	153	64	98	96	131	51	56	61	97	121	88	90	96	72	89	185	326
IAPEY3C_LTR	2	17	18	12	37	26	14	18	42	18	32	35	17	15	21	22	15	27	24	23	25	33	22	45	24	45	12	15	39	19	29	13	26	12	37	15	15	11	23	14	27	53	30	31	36	16	15	55	288
IAPEY3_LTR	9	4	5	3	12	9	16	27	8	11	24	17	19	4	10	17	30	29	3	4	8	16	16	19	18	11	8	5	22	17	31	4	19	7	13	2	19	7	3	13	18	17	13	15	17	19	21	19	40
IAPEY4_I-int	5	7	2	2	7	20	2	4	11	3	5	6	10	2	0	3	57	33	3	3	0	2	2	6	1	3	3	2	1	4	6	3	2	3	2	3	2	3	6	3	3	9	4	0	1	8	5	23	26
IAPEY4_LTR	7	14	0	0	0	24	2	3	1	1	4	3	0	0	1	2	30	11	2	5	5	0	1	1	4	0	0	4	7	6	2	0	1	1	1	0	3	0	0	0	4	1	4	4	1	1	5	12	9
IAPEY5_I-int	1	8	12	31	23	18	33	12	20	12	8	31	6	0	1	13	9	2	0	11	7	1	6	18	11	33	9	17	58	9	35	14	5	15	22	11	5	1	19	14	18	1	5	22	6	3	21	25	2
IAPEY5_LTR	35	30	23	29	70	32	52	65	47	65	72	102	28	8	14	27	28	21	23	48	53	29	31	96	69	131	98	35	97	62	46	62	36	34	80	38	41	23	34	43	44	60	30	67	55	44	76	51	31
IAPEY_LTR	35	20	16	13	20	13	20	24	21	35	19	19	39	25	41	20	52	72	22	43	25	26	44	64	25	22	21	18	26	15	19	23	24	9	10	5	31	30	13	22	35	32	31	47	29	49	45	71	13
IAPEy-int	32	30	32	36	28	16	15	26	13	37	19	50	50	15	22	25	42	84	43	35	20	34	34	46	16	25	35	16	22	37	30	14	14	12	22	14	28	12	4	14	10	34	24	28	35	16	25	53	45
IAPEz-int	53	111	164	164	364	246	171	433	191	196	128	132	13	40	65	20	262	345	27	38	34	16	110	89	41	663	96	174	317	122	104	94	256	165	323	362	54	70	16	108	139	583	84	48	141	181	67	417	1514
IAPLTR1_Mm	2	12	4	2	9	8	12	12	14	8	5	1	0	2	2	0	16	23	5	6	4	2	3	5	1	5	0	7	11	7	4	1	10	2	1	2	1	2	0	0	2	14	0	3	5	0	3	23	344
IAPLTR1a_Mm	87	102	84	69	104	69	96	108	53	71	71	104	114	64	106	86	126	117	148	111	129	61	79	126	99	83	66	84	134	78	98	79	110	41	88	47	105	73	61	88	121	233	133	98	112	65	88	120	219
IAPLTR2_Mm	5	2	19	8	49	29	24	29	25	8	31	28	6	3	7	3	19	25	6	12	8	12	12	15	13	21	8	21	23	11	17	10	10	21	13	10	26	19	8	8	31	37	7	14	27	16	16	48	196
IAPLTR2a	6	3	14	7	25	20	14	22	8	14	13	17	2	1	4	2	8	12	6	4	9	2	9	10	7	17	10	8	11	11	10	10	14	3	13	13	12	17	8	7	27	20	10	13	7	10	10	27	109
IAPLTR2a2_Mm	73	98	73	74	292	138	139	192	159	149	175	173	76	58	120	62	73	108	102	191	179	156	207	304	102	195	98	133	228	90	141	123	117	108	117	111	168	143	90	155	176	323	214	166	152	233	238	385	899
IAPLTR2b	22	10	30	11	76	17	19	21	23	26	30	17	15	3	81	17	70	80	61	21	17	63	37	25	13	22	17	25	19	10	15	24	15	22	22	9	24	25	9	32	40	27	22	21	17	26	27	123	71
IAPLTR3	7	3	1	11	0	6	9	10	7	17	3	15	1	2	8	2	9	16	3	6	4	2	1	9	1	16	8	4	6	11	9	13	6	13	14	1	7	7	7	6	8	3	7	13	4	6	4	6	8
IAPLTR3-int	10	2	5	12	10	6	1	4	7	9	7	1	2	1	1	25	19	44	14	8	2	15	4	21	4	4	0	3	3	0	4	4	7	1	1	2	1	1	3	2	17	3	5	13	3	10	8	25	42
IAPLTR4	0	2	2	0	1	3	1	2	0	2	1	7	2	2	3	3	10	5	5	3	1	1	0	3	2	4	4	3	3	8	1	7	0	1	3	3	0	0	2	0	1	1	0	1	2	9	0	5	34
IAPLTR4_I	0	0	0	1	0	4	10	20	0	0	5	11	9	0	0	1	5	5	1	0	0	5	3	7	5	6	0	1	6	10	3	0	5	3	1	3	4	0	0	3	3	1	0	1	5	0	0	3	2
ID	447	618	529	523	530	279	433	559	420	533	658	813	1022	466	617	489	646	602	657	718	618	503	466	902	615	758	625	566	672	495	511	525	452	298	639	389	483	321	299	563	580	896	712	794	641	801	751	745	360
ID2	1499	2006	1313	1500	1818	927	1379	1713	1167	1702	1615	1921	1778	1274	1662	1267	1729	1660	1269	1951	1539	1591	1633	2733	2101	2089	1656	1670	2124	1428	1981	1367	1442	914	1379	1208	1615	1127	712	1315	1699	2543	1756	1828	2117	1785	1751	2056	861
ID4	3480	3982	3991	3443	3168	1873	2478	3149	2300	3440	4397	5702	6709	3627	5447	4524	5775	5025	6285	5040	3909	4124	3538	6018	2764	3309	2574	2190	2821	3018	2571	2545	2359	1441	2797	1836	2578	1842	1564	2654	3030	4645	3255	3174	3681	3673	3589	4005	2474
ID4_	3870	4498	2980	3795	3239	1980	3046	3700	2767	3507	4358	5696	6088	3099	4372	3830	4589	4149	4459	4758	3628	3700	3092	6125	4059	4304	3362	2808	3789	3552	2928	2991	2886	1830	2967	2303	2949	2073	1793	2839	3091	4976	3546	3831	3731	4410	3733	3841	2566
ID_B1	17480	20694	17201	17666	15464	10238	13917	16866	13141	18213	20664	25974	30368	15566	22593	19158	25610	22126	21367	22492	18623	17156	13912	28874	17318	21019	16760	13171	17336	15371	14164	15496	13425	8979	16111	11470	14479	9985	8467	15045	15371	26166	17856	18830	18224	20499	21174	22375	13510
IMPB_01	655	838	915	595	799	656	576	635	538	834	958	1229	1389	894	1417	1036	1397	1562	1239	1311	1079	998	836	1659	832	997	764	537	723	634	685	738	687	423	829	580	730	498	374	686	830	1439	927	915	947	991	1195	1405	978
Kanga1	24	28	18	16	19	5	22	29	19	19	25	40	62	33	27	26	50	32	38	19	16	28	26	39	25	40	22	18	15	22	14	19	12	13	21	5	7	10	5	11	10	26	12	26	14	22	17	32	20
Kanga11a	11	26	5	6	8	12	10	10	12	12	10	4	10	9	10	3	17	16	9	9	23	17	4	20	8	13	4	4	2	7	10	10	4	1	6	5	14	7	8	7	7	19	9	15	19	28	22	28	8
Kanga1a	5	0	2	0	0	3	4	0	0	1	2	0	3	1	5	2	2	3	2	2	3	0	1	1	0	8	3	1	0	1	0	4	0	0	3	1	2	0	0	3	0	4	2	2	1	0	4	1	0
Kanga1b	0	0	1	0	0	0	0	0	0	0	0	0	0	0	0	0	4	2	0	0	0	0	0	0	0	0	0	0	0	0	0	0	0	0	0	0	0	0	0	0	0	0	1	0	0	1	0	2	0
Kanga1c	3	3	5	2	2	2	2	2	6	7	4	5	4	3	11	11	2	14	1	8	8	9	2	4	5	0	2	1	2	5	3	5	0	1	2	0	0	3	0	1	3	0	0	7	2	4	2	10	14
Kanga1d	0	2	0	2	5	0	0	1	0	1	0	2	0	2	3	2	3	4	0	2	0	0	1	1	0	0	0	1	0	1	0	1	0	0	1	1	0	0	0	2	0	17	0	2	0	0	5	1	23
Kanga2_a	2	3	5	3	7	7	3	1	0	1	5	0	0	1	4	5	7	11	6	1	5	6	0	1	5	6	6	5	0	9	6	3	4	1	4	0	4	0	1	3	2	3	0	3	3	0	2	8	8
L1M	29	21	14	17	17	15	15	17	11	14	31	29	24	15	26	15	32	17	20	29	32	20	21	25	13	15	15	13	11	20	26	27	26	16	26	10	19	22	14	18	26	49	21	31	23	26	27	43	17
L1M1	2	4	5	1	7	6	3	2	3	1	1	0	4	5	6	8	18	12	6	7	6	13	1	15	1	3	5	1	6	4	3	2	3	4	7	2	3	3	3	1	8	8	2	6	1	9	5	10	11
L1M2	724	830	783	574	425	393	443	513	436	695	798	762	1381	709	939	803	1216	1098	1080	790	693	765	586	903	558	758	565	354	516	706	442	562	506	348	675	424	503	281	293	521	697	1033	767	656	691	790	1009	1040	984
L1M2a	0	0	0	0	1	0	0	0	0	2	1	0	0	0	0	0	2	3	0	1	0	0	4	2	0	0	0	0	0	0	0	0	0	2	1	1	0	0	1	0	1	0	0	1	0	0	0	2	2
L1M2a1	0	0	0	0	0	0	0	0	0	0	0	0	0	0	0	0	0	1	0	0	0	0	0	0	0	0	0	0	0	0	0	0	0	0	0	0	0	0	0	0	0	0	1	0	0	0	0	0	0
L1M2b	3	16	17	6	4	5	6	8	15	14	3	4	25	2	8	2	9	14	32	21	8	19	16	21	6	11	25	4	8	9	6	8	5	5	16	2	3	5	6	25	13	63	18	23	9	25	11	14	42
L1M2c	4	26	0	0	0	12	1	3	3	1	2	3	2	1	0	1	10	10	0	2	1	9	0	4	1	5	0	3	0	1	5	0	2	1	0	10	3	0	0	8	4	0	2	8	4	3	8	15	7
L1M3	676	902	711	711	695	344	474	529	535	742	869	1036	1449	701	999	835	1206	978	908	988	630	746	576	1202	626	863	575	525	707	680	521	574	467	284	504	368	490	366	310	469	705	866	545	727	822	720	688	907	1074
L1M3a	0	0	0	1	0	0	0	0	0	0	0	0	0	0	0	2	2	2	0	0	0	0	0	1	0	0	0	0	0	1	0	0	0	0	0	0	0	0	0	0	0	0	0	0	0	0	1	4	0
L1M3b	0	0	0	0	0	0	0	0	0	0	0	0	0	0	0	2	4	5	0	0	0	0	0	0	0	0	0	0	0	0	0	0	0	0	0	6	0	0	0	0	0	0	1	1	0	0	0	5	0
L1M3c	2	4	5	3	2	1	0	1	0	1	3	1	0	0	0	2	4	9	4	4	0	0	3	2	2	1	0	1	0	0	0	1	8	0	1	0	0	4	2	0	4	2	4	4	0	4	0	4	22
L1M3d	7	5	1	6	6	4	9	5	3	7	3	10	13	5	9	6	28	11	8	6	1	4	7	7	2	7	4	2	1	6	3	2	8	5	5	0	4	0	0	4	2	3	0	12	4	2	0	11	0
L1M3de	89	82	64	88	75	36	48	68	56	79	147	148	144	66	99	100	149	93	138	99	44	46	56	69	70	134	58	75	111	91	107	90	46	40	80	75	59	36	32	50	76	98	55	110	70	56	83	46	46
L1M3e	44	58	55	52	57	50	63	82	76	56	76	102	86	44	56	65	94	53	89	102	52	67	34	83	77	65	58	31	34	50	52	26	18	29	54	31	37	28	20	56	24	110	58	55	46	31	65	55	86
L1M3f	0	0	1	0	0	0	0	0	0	0	0	0	0	0	0	0	0	0	0	0	1	0	0	3	0	1	2	0	0	0	0	1	3	0	0	0	0	2	0	0	0	1	0	0	2	0	0	1	5
L1M4	907	927	1035	1004	918	600	635	833	707	1021	1305	1368	2184	1051	1481	1187	1773	1585	1457	1511	1138	1003	908	1773	650	1006	701	619	778	1002	654	897	705	557	1001	605	752	490	425	736	740	1178	846	950	845	1045	1409	1425	826
L1M4a1	102	211	104	257	216	65	161	149	156	169	265	198	228	130	236	174	150	98	101	128	70	123	86	243	110	117	103	61	64	63	80	103	136	59	87	69	72	49	55	76	69	60	36	100	111	109	287	121	20
L1M4a2	39	16	32	16	21	18	23	26	28	27	51	52	35	22	33	22	90	30	50	56	21	39	37	62	44	26	28	34	45	26	25	34	22	18	24	25	25	40	8	26	35	34	22	28	34	48	51	44	37
L1M4b	152	195	282	183	199	141	101	156	138	281	217	255	305	144	362	270	377	390	301	348	266	256	191	349	133	246	130	121	106	211	197	193	210	98	174	202	206	123	113	276	220	339	281	293	198	340	413	494	181
L1M4c	43	42	78	60	28	30	27	30	91	50	72	43	59	55	102	77	140	99	96	67	58	61	61	75	34	49	74	32	26	26	56	64	59	31	71	49	21	17	17	52	39	60	69	45	56	70	78	100	152
L1M5	2177	2326	2470	1977	1607	1240	1276	1479	1137	1669	2091	3127	2872	1411	2817	2219	3103	2265	2357	1945	1690	1695	1595	2734	926	1050	825	969	1137	2002	1168	1247	897	643	1114	842	1134	783	530	805	861	1614	1004	962	1082	1308	1782	1911	701
L1M6	2	4	4	6	5	6	0	3	3	1	1	3	7	6	7	2	21	11	11	1	2	5	4	10	4	7	5	0	1	3	2	6	4	3	4	0	4	0	0	1	3	2	5	7	9	3	3	5	4
L1M6B	3	3	2	15	10	0	6	5	2	2	4	5	28	9	24	14	25	11	5	35	14	7	12	25	6	0	0	5	15	9	6	8	2	2	8	0	10	5	4	4	2	14	5	3	7	5	5	25	0
L1M7	7	4	10	15	14	17	9	9	3	23	18	29	22	15	18	11	10	15	36	26	29	24	13	24	4	10	10	9	4	14	13	19	18	7	21	18	11	12	11	11	9	29	20	11	11	12	18	33	0
L1M8	0	0	0	0	0	0	0	2	0	0	2	0	0	1	0	0	2	12	0	4	0	1	0	5	0	0	0	0	0	0	0	0	0	0	1	1	2	1	0	1	3	0	0	0	0	1	3	12	0
L1MA10	21	25	9	17	10	3	9	15	8	7	17	12	19	12	11	15	24	33	5	10	19	10	8	20	4	17	16	6	3	9	7	7	13	7	6	10	6	3	7	16	10	14	18	7	15	8	14	21	17
L1MA4	826	764	959	602	924	435	395	461	455	775	1117	1264	1618	943	1746	1183	1708	1428	1485	1362	865	1216	940	1442	358	388	307	519	348	978	793	745	586	377	724	491	722	545	313	505	522	930	590	730	590	782	927	1472	460
L1MA4A	34	23	29	35	16	19	38	35	25	35	17	29	30	44	27	17	73	87	77	47	39	17	28	49	32	27	29	15	18	31	24	22	16	16	25	12	18	10	6	27	43	32	22	29	25	30	72	106	27
L1MA5	153	218	224	149	109	91	114	138	128	132	217	210	401	235	277	242	442	331	312	263	197	197	168	238	132	144	98	81	93	148	116	126	121	65	101	112	122	76	47	89	101	149	144	167	163	162	173	321	98
L1MA5A	562	1471	377	505	132	110	258	253	204	301	1193	487	796	507	611	612	481	962	500	473	299	284	244	311	679	597	371	264	402	2176	1043	962	770	550	488	326	754	383	413	853	651	1104	881	795	934	1319	1823	968	190
L1MA6	2252	2558	1867	1834	1729	790	1563	1775	1435	2216	2381	2927	2919	1338	1976	2073	2628	2076	1975	1917	1270	1203	1337	2302	1719	2757	2147	1276	2021	1851	1789	1911	1638	1044	1997	1347	832	660	483	1145	1144	2075	1553	1481	1789	1635	2061	1857	1557
L1MA7	114	108	72	108	70	57	58	90	47	70	86	141	167	98	134	152	188	159	161	109	91	103	89	123	52	75	61	53	35	77	74	71	73	54	71	45	65	46	30	38	64	99	58	53	56	75	108	137	94
L1MA8	676	890	642	730	450	310	479	460	388	510	596	668	1276	622	767	649	905	793	700	658	529	487	384	1070	703	768	668	431	648	755	572	593	440	343	548	371	381	356	254	460	383	769	631	585	437	733	779	807	404
L1MA9	220	251	201	167	178	113	125	213	116	237	231	274	358	174	280	226	340	259	230	191	143	222	171	260	130	136	105	84	83	196	95	130	85	84	125	97	110	68	59	96	77	181	101	69	130	161	172	214	61
L1MB1	113	136	238	111	174	157	139	155	131	238	264	287	259	79	183	233	220	165	171	289	252	147	113	365	133	138	129	104	143	149	178	179	161	121	182	120	115	102	69	127	122	296	191	221	319	190	244	299	138
L1MB2	394	597	785	536	894	571	508	467	445	632	753	1181	1005	606	1087	902	1056	926	948	1250	1018	804	665	1261	605	551	557	623	624	748	740	696	568	374	805	467	854	679	456	844	1023	1499	1134	1197	1015	805	988	1369	802
L1MB3	1571	2523	1733	2165	1607	1036	1346	1845	1178	1538	2193	2638	2937	1524	1924	1541	2238	1960	2165	2408	1766	1500	1371	2874	1699	2277	1725	1363	1854	2261	1680	1833	1793	1179	1800	1500	1384	843	732	1599	1088	2252	1857	1736	1629	2140	2089	2187	1031
L1MB4	34	61	220	50	73	68	32	37	33	72	87	99	181	121	194	244	286	307	405	166	156	137	159	142	41	119	51	41	57	95	36	57	53	25	114	59	55	49	19	74	98	114	120	55	78	100	100	146	78
L1MB5	1154	1053	1333	1181	1128	700	921	1162	915	1073	1524	1553	2341	1311	1683	1562	2266	1349	2116	2085	1490	1550	1350	2273	901	1181	1279	824	1113	1406	880	943	936	592	1302	927	1181	837	750	1317	1096	1965	1433	1337	1498	1573	1266	1887	1011
L1MB7	2499	3058	2781	2426	2149	1266	1780	2223	1583	2138	3074	3575	4830	2646	3313	2683	3807	3093	3356	3398	2375	2387	2182	3974	2110	2647	1974	1698	2078	2741	1892	2099	1917	1336	1818	1605	1881	1150	998	1745	1294	2863	2369	2315	2082	2676	2753	3082	964
L1MB8	1808	1482	1623	2085	2280	1001	1302	1355	1318	1871	2150	2615	4404	3241	4636	2996	3878	3985	3377	4602	3140	3023	3243	5141	1379	1311	997	1376	1380	1802	1468	1579	1629	824	1401	1201	2254	1911	903	1711	2253	2812	2750	2498	2359	3242	3291	4360	982
L1MC	195	256	197	217	231	144	215	230	171	244	276	332	500	241	289	235	298	304	305	326	246	283	179	417	233	259	201	170	272	199	184	228	180	119	207	157	223	108	119	162	150	254	262	283	283	294	315	373	131
L1MC1	602	714	1129	703	903	653	601	742	589	1025	1264	1640	1762	1004	1628	1631	1826	1720	2201	1581	1384	1705	1037	1998	621	881	593	662	573	831	714	606	774	461	846	552	719	659	438	753	975	1255	870	986	755	1174	1173	1708	556
L1MC2	422	532	451	429	264	207	287	405	268	429	470	451	882	371	486	450	608	441	644	467	366	325	243	664	348	525	320	249	357	437	251	355	249	170	467	219	198	139	145	294	212	397	353	337	459	440	524	382	208
L1MC3	248	283	198	243	209	189	187	185	160	201	282	293	455	194	235	238	335	303	360	298	246	256	222	421	194	268	271	138	214	225	198	202	193	105	262	140	194	136	104	204	200	407	195	262	233	242	336	340	320
L1MC4	290	324	307	197	170	209	203	336	219	265	305	368	453	265	406	295	510	437	345	412	334	309	199	431	249	257	191	180	232	288	239	203	166	137	212	183	196	90	108	173	266	394	344	195	315	320	357	321	556
L1MC4a	182	128	171	75	85	62	66	89	87	109	122	124	413	289	376	289	428	410	430	183	102	127	112	182	79	94	104	54	67	77	58	86	37	49	141	56	96	59	30	91	80	143	96	116	88	155	194	203	168
L1MC5	173	126	172	144	114	68	91	120	112	129	170	124	269	134	183	180	257	232	230	198	133	151	122	225	77	128	97	73	114	150	85	98	72	57	107	60	121	54	49	55	114	165	89	105	128	173	204	230	192
L1MC5a	61	80	62	24	41	37	41	40	30	38	32	53	94	48	67	63	104	103	64	59	61	48	20	73	27	40	27	37	43	46	33	45	30	32	55	30	37	21	17	32	28	46	53	37	53	47	72	87	35
L1MCa	35	87	127	62	55	50	36	46	53	64	96	116	186	61	204	86	199	157	182	98	84	103	96	100	37	68	36	42	43	48	55	37	23	50	83	27	39	29	13	28	77	113	59	86	83	72	123	135	166
L1MCb	5	5	2	9	13	12	21	21	12	19	5	17	24	20	41	10	22	23	17	3	10	12	1	2	5	33	14	5	15	10	3	3	9	5	3	3	8	9	5	20	11	24	19	17	13	18	37	22	7
L1MCc	8	2	6	5	2	3	4	6	2	1	7	9	6	6	8	4	23	29	12	7	10	8	11	5	9	2	7	4	9	6	9	3	0	2	4	5	2	12	1	1	4	15	0	10	10	3	8	14	103
L1MD	760	774	500	663	769	307	586	953	427	440	423	512	1277	909	1064	944	1186	991	1217	1407	1071	883	1132	1382	717	515	757	606	180	657	775	664	551	305	620	356	1488	917	488	530	813	1196	770	1506	1043	1552	822	2542	378
L1MD1	132	115	162	93	97	92	92	111	97	114	151	161	415	112	243	172	265	219	251	240	226	180	165	234	172	108	121	99	116	173	110	152	114	61	109	69	179	139	70	159	222	357	189	260	182	187	250	236	288
L1MD2	246	316	303	246	221	133	218	188	203	267	383	338	457	202	371	306	363	408	336	328	320	265	192	471	296	340	254	169	255	211	224	251	199	134	241	180	265	170	116	273	257	308	304	340	302	422	423	432	407
L1MD3	75	89	73	51	42	27	42	62	68	76	68	86	110	62	85	67	102	95	125	76	63	80	51	91	42	52	50	42	40	60	32	71	44	31	78	34	38	39	23	51	61	78	62	61	48	70	95	95	134
L1MDa	64	91	74	19	65	45	49	45	45	83	111	131	116	75	119	83	155	153	128	113	72	116	69	141	51	80	37	37	42	26	50	72	57	58	90	43	49	41	29	28	43	86	80	66	69	62	119	184	107
L1MDb	0	31	44	22	21	19	15	64	55	50	61	21	37	25	72	61	45	42	34	76	56	65	22	48	38	69	71	24	23	37	17	31	31	23	58	22	57	8	29	89	29	83	86	42	36	85	40	58	16
L1ME1	1096	1177	1027	1037	835	453	775	847	672	903	1272	1404	2375	1065	1558	1262	1737	1438	1644	1412	1021	1141	778	1602	940	950	843	626	805	853	722	698	604	461	640	441	711	555	451	775	854	1345	916	995	1142	1154	1126	1164	661
L1ME2	69	98	98	119	123	48	67	98	78	91	130	119	228	82	140	140	178	167	179	129	109	98	122	161	112	115	79	55	68	110	65	82	64	40	91	52	47	63	33	88	114	120	132	92	120	126	131	153	118
L1ME2z	198	181	173	161	164	104	166	196	90	145	177	250	379	275	243	206	288	238	144	229	202	265	241	343	159	151	106	102	136	118	114	101	75	64	94	79	134	62	69	90	151	265	109	150	194	225	127	213	172
L1ME3	108	168	146	171	107	49	74	115	105	140	196	233	249	156	241	131	231	228	136	163	172	127	116	202	107	200	115	74	87	145	158	165	106	67	163	53	84	83	60	88	105	204	107	98	130	148	121	229	125
L1ME3A	228	262	246	187	158	113	207	172	128	262	247	233	301	129	197	186	200	172	334	176	168	226	254	271	163	152	149	116	173	239	135	135	138	90	239	134	155	100	79	126	130	347	208	157	228	173	157	294	181
L1ME3B	33	16	9	15	13	11	21	20	11	36	38	35	87	17	13	34	45	25	18	73	30	22	55	44	48	57	28	15	40	32	45	22	33	10	31	13	49	38	32	30	35	25	19	47	38	16	51	48	4
L1ME3C	2	4	7	7	6	4	3	3	15	5	15	6	4	0	21	10	12	19	11	9	4	10	9	5	11	16	9	2	7	6	14	12	3	5	4	0	5	2	8	8	6	1	5	3	10	2	8	16	26
L1ME3Cz	97	94	79	138	127	36	84	69	54	92	111	103	114	64	45	68	85	85	40	73	58	67	46	136	101	69	68	82	75	63	107	62	90	26	58	23	51	51	25	30	52	56	46	55	90	44	69	56	58
L1ME3D	158	128	110	75	89	73	107	95	87	159	134	166	211	70	96	77	164	107	115	121	78	81	108	195	94	110	116	59	97	107	124	90	76	39	117	73	73	40	42	42	80	246	111	89	116	74	77	157	204
L1ME3E	21	23	7	19	15	12	6	14	11	9	22	15	18	9	10	7	20	15	15	11	16	17	11	23	21	22	20	19	14	16	6	10	9	14	15	17	11	6	13	10	6	22	17	10	7	19	20	21	6
L1ME3F	70	81	83	99	105	26	87	58	53	97	118	116	89	52	142	72	98	146	77	135	73	87	78	197	73	73	54	53	67	39	47	98	64	33	80	73	38	42	20	43	51	73	107	72	59	62	71	110	30
L1ME3G	29	45	20	18	12	6	5	15	6	22	17	24	21	27	19	23	35	28	12	12	17	18	11	33	15	34	20	12	14	20	12	23	19	4	6	6	21	11	6	18	7	16	11	13	14	12	20	24	19
L1ME4a	453	542	581	391	351	224	303	357	243	393	492	624	764	468	774	609	859	723	609	536	477	500	462	769	267	321	255	189	264	462	357	258	228	196	273	227	284	213	148	225	229	480	341	348	360	543	512	444	220
L1ME4b	369	461	393	393	364	288	371	440	305	408	579	593	858	340	553	448	689	466	620	609	422	414	374	762	360	417	352	243	330	407	314	389	336	215	466	263	266	221	220	361	322	479	409	554	480	575	708	549	164
L1ME4c	106	70	162	69	99	72	63	66	42	92	128	113	177	105	263	204	264	256	340	249	216	222	136	247	60	49	60	54	71	106	79	110	73	43	135	70	109	120	79	117	177	211	205	168	159	115	149	244	55
L1ME5	0	0	0	0	0	0	0	0	0	0	0	0	0	0	0	0	3	3	0	0	0	0	0	0	0	0	2	0	0	4	0	0	1	0	0	0	0	0	0	0	0	1	0	0	0	0	0	6	0
L1MEa	0	0	0	0	0	5	0	0	0	0	0	0	0	0	1	0	4	1	0	0	0	1	0	0	0	0	0	0	0	0	0	0	0	0	0	0	0	0	0	0	0	1	0	0	0	2	0	4	0
L1MEb	2	4	8	10	10	3	1	2	4	5	4	8	0	0	9	0	7	6	12	5	2	1	1	14	2	9	1	14	15	4	4	4	4	2	0	2	5	0	0	3	5	9	3	5	4	3	9	12	4
L1MEc	807	774	573	759	850	544	871	645	500	840	1274	1420	1450	615	928	855	1248	900	1153	1412	1010	846	773	1728	1128	1003	811	1028	1120	1144	1125	902	943	502	866	571	1018	969	429	955	1054	1566	1213	1818	979	1177	1054	1194	410
L1MEd	209	501	579	165	190	194	204	366	195	329	436	415	539	259	667	493	663	494	697	588	487	493	379	678	230	393	268	115	250	254	297	390	226	305	371	330	252	156	158	300	242	607	446	470	483	633	729	639	213
L1MEf	35	102	90	61	59	50	35	111	69	98	137	88	221	89	91	112	159	156	188	131	103	66	62	119	46	117	88	40	61	93	40	76	54	37	101	58	53	19	30	79	99	88	108	100	87	138	118	124	70
L1MEg	369	468	395	247	256	208	260	420	238	411	531	574	663	303	520	397	530	474	537	560	400	404	347	657	318	346	241	220	372	354	335	472	275	333	466	381	292	218	163	335	240	557	501	577	442	597	655	568	308
L1MEg1	0	1	0	0	0	1	0	1	0	1	3	0	2	0	0	5	0	0	0	0	0	0	6	0	2	5	0	0	1	4	0	0	1	0	5	0	0	2	0	0	0	0	0	0	0	0	0	1	0
L1MEg2	4	18	3	6	8	1	0	8	0	8	1	4	8	16	5	6	20	17	13	17	9	17	9	4	17	1	14	4	5	6	1	4	1	0	13	2	7	4	5	11	17	29	22	7	13	1	6	5	107
L1MEh	12	0	1	2	3	6	2	0	0	2	1	3	0	3	5	0	9	7	1	6	0	1	0	2	3	2	6	2	3	2	2	0	0	2	7	2	2	0	3	3	5	16	3	0	0	8	1	2	1
L1MEi	21	1	11	20	2	7	13	9	8	5	14	4	13	12	10	10	14	9	7	6	11	7	2	12	7	5	7	2	8	12	3	8	11	3	5	5	9	5	4	7	10	27	14	7	5	16	8	9	136
L1MEj	18	14	8	4	13	2	7	5	7	13	10	14	19	17	17	9	19	23	12	10	9	4	5	8	8	14	6	2	4	7	4	18	5	5	8	16	7	7	0	10	24	21	17	22	3	7	11	10	13
L1Md_A	102	115	99	121	68	191	87	90	71	128	123	124	171	91	111	101	896	1267	126	127	102	121	111	257	138	90	89	102	147	113	120	73	78	69	103	77	92	57	76	148	135	201	155	165	121	210	159	955	369
L1Md_F	61	75	73	66	51	50	55	94	52	70	94	123	87	46	65	72	201	241	71	94	79	51	56	127	76	65	65	58	75	53	87	94	60	64	73	57	74	37	25	64	42	92	97	78	83	103	106	242	166
L1Md_F2	514	606	423	215	191	806	269	409	191	386	480	481	643	223	578	368	2081	2671	600	567	388	442	422	748	343	324	309	189	309	316	373	493	259	352	408	355	288	244	165	274	362	615	517	656	509	576	747	2326	2832
L1Md_F3	295	397	268	313	264	204	225	283	206	329	384	379	521	228	368	352	661	690	355	463	281	334	324	462	281	326	278	268	242	336	275	270	298	196	278	236	311	214	146	280	319	529	423	472	384	445	393	736	279
L1Md_Gf	21	34	32	4	8	19	7	28	9	24	25	32	41	17	31	13	72	76	32	37	21	20	22	34	26	13	6	0	20	9	14	30	11	26	22	21	9	9	11	13	13	22	29	24	42	37	60	65	34
L1Md_T	353	582	434	368	273	345	238	364	304	342	498	721	1022	451	576	393	1627	1856	505	559	430	543	418	776	325	276	234	193	270	472	304	307	194	217	318	252	297	217	207	258	497	580	577	474	580	490	602	1547	619
L1P5	1	0	0	0	0	0	0	0	0	0	1	0	0	0	0	0	2	2	0	0	1	0	1	0	0	0	0	0	0	0	0	0	0	0	0	0	0	0	0	2	0	0	0	0	0	0	0	0	0
L1PB4	0	4	10	4	2	1	0	5	8	4	3	1	8	3	1	0	6	4	7	2	6	5	3	6	2	8	10	1	2	15	6	5	7	7	2	2	5	1	6	0	5	13	8	13	14	4	4	6	0
L1VL1	15	11	15	17	13	25	8	18	8	14	28	11	29	10	13	22	66	71	21	15	12	10	10	27	18	23	14	11	4	15	27	15	14	12	20	8	7	9	1	9	27	43	25	28	31	25	27	92	43
L1VL2	276	351	220	298	385	236	272	313	201	328	430	425	472	215	419	405	534	602	433	465	337	297	378	612	390	404	325	343	457	359	453	418	385	256	414	290	341	237	164	334	368	513	435	521	337	421	386	637	487
L1VL4	110	134	124	116	102	107	84	108	59	100	126	170	158	95	179	146	272	455	160	180	142	121	116	205	109	114	76	66	90	131	111	117	99	72	112	93	129	59	62	89	92	244	139	135	126	161	179	421	118
L1_Mm	33	42	40	23	33	53	19	20	16	29	39	48	74	25	60	64	156	213	94	62	28	52	49	87	36	20	24	23	23	30	38	38	22	22	34	33	41	20	18	29	49	56	44	39	42	38	46	186	33
L1_Mur1	40	42	47	22	34	34	35	43	20	30	62	49	75	23	51	39	138	200	56	40	41	38	44	82	37	37	38	25	40	27	39	50	26	26	36	29	36	15	16	38	43	99	64	66	65	49	81	254	185
L1_Mur2	1314	1324	858	1024	1011	599	847	980	669	1270	1432	1989	1493	928	1307	1178	1548	1507	1189	1169	805	995	950	1541	1015	1135	591	782	1062	795	950	752	646	452	647	620	803	422	237	688	848	1033	755	843	817	963	1001	1381	1036
L1_Mur3	860	1006	846	872	909	552	672	715	490	799	1003	928	1472	700	1205	1012	1544	1588	1188	1215	950	896	780	1743	720	915	758	603	932	872	819	759	670	490	711	456	714	630	363	673	797	1157	913	1053	804	1043	1294	1627	1143
L1_Mus1	605	738	611	508	582	437	636	570	425	979	875	1165	1228	522	1776	872	1555	1803	2301	1246	1482	657	744	1344	673	949	692	543	708	636	679	777	604	392	782	572	638	381	369	743	561	1261	1082	952	636	965	1075	2149	1232
L1_Mus2	2542	2548	1457	1958	1917	1461	2390	2831	2140	2445	2624	3206	3359	1319	2203	1450	2229	2114	1842	2647	2383	2003	2073	4117	4354	5023	4219	3246	4398	2622	2812	2735	2227	1662	3043	2236	3565	1950	1853	2726	3040	6040	2550	4177	3059	3796	3300	3870	4111
L1_Mus3	356	454	390	257	299	348	258	397	236	344	461	489	616	223	544	361	1140	1536	473	507	352	383	348	615	373	356	286	205	306	316	322	435	221	302	388	278	322	190	165	321	306	512	489	462	482	533	690	1540	885
L1_Mus4	135	130	105	61	103	100	78	129	58	135	125	145	195	92	129	153	360	490	103	103	118	111	144	174	63	130	93	83	65	115	81	97	50	75	84	51	85	43	34	78	166	135	93	110	119	104	134	432	205
L1_Rod	637	754	640	569	431	257	455	522	408	535	751	792	983	549	766	615	763	738	650	1006	711	563	519	984	556	701	597	463	512	585	555	608	459	353	603	484	415	237	229	613	494	841	756	712	682	948	996	805	325
L2	2545	3307	2499	2776	3398	1765	2844	2896	2280	3581	3643	4037	3896	2108	3017	2630	3453	3079	2810	4117	3400	2681	2692	5270	3851	4363	3218	2914	4431	3099	3410	3315	2943	1715	3149	2388	3051	2352	1413	2805	3398	5241	3541	3939	3836	3567	3814	4698	2591
L2a	1849	2512	1744	2112	1912	1285	1573	1739	1371	1910	2604	2871	3327	1630	2401	2273	2954	2724	2377	2534	2131	1953	1658	3394	2072	2712	1880	1720	2081	1993	1901	1931	1700	1035	1888	1213	1670	1195	995	1619	1993	3273	2142	2471	2296	2291	2375	2700	1943
L2b	858	997	854	918	794	593	727	769	693	924	901	1200	1374	734	1213	1107	1553	1269	1236	1140	1075	919	853	1626	1010	1153	1040	797	929	809	772	809	752	485	883	626	777	649	425	961	999	1614	1018	1023	1012	1180	1200	1300	787
L2c	1070	1287	1109	1027	1141	790	908	1091	882	1181	1284	1681	1578	829	1598	1072	1425	1417	1185	1469	1353	1048	956	1914	1352	1528	1256	985	1308	1149	1047	1167	1165	716	1219	873	1074	714	730	1208	1239	2284	1477	1576	1431	1612	1529	1623	1180
L3	4159	4907	3672	4192	3483	2639	3331	4153	2962	4304	4705	5915	6142	3491	4719	4513	5225	4432	4882	5045	4779	4754	3628	7004	4349	4354	3506	3547	3920	3755	3776	3319	3005	2056	3367	2393	3606	2451	1979	3268	3651	5844	3868	4168	4017	5085	4054	4636	3188
L3b	796	1043	845	921	699	380	449	607	418	667	969	1147	1316	644	912	968	1258	962	1177	1100	589	709	608	1008	515	568	425	468	550	789	575	657	574	311	628	397	408	308	277	441	429	736	650	600	531	615	614	634	269
L4_A_Mam	55	70	91	68	115	65	74	90	86	73	140	128	167	59	71	83	149	82	118	131	121	128	106	190	127	152	140	107	82	107	86	76	109	65	124	75	75	56	52	116	163	233	158	138	122	129	117	110	90
L4_B_Mam	1	31	39	24	30	13	15	20	31	17	21	28	27	34	24	25	35	28	16	39	35	15	18	25	14	21	24	10	12	21	16	15	13	8	26	14	19	12	10	16	12	24	35	19	17	16	30	30	73
L4_C_Mam	35	31	29	41	47	38	33	54	51	55	70	85	65	29	38	76	56	52	54	66	61	48	45	92	25	40	27	33	42	55	43	51	47	34	37	42	47	31	23	24	23	59	52	42	39	70	50	75	107
L5	4	6	1	1	3	1	3	2	10	8	6	5	10	8	6	8	11	7	16	3	4	14	9	13	7	2	7	4	10	1	0	5	3	10	8	1	6	2	7	6	9	9	10	7	4	8	10	12	3
LFSINE_Vert	1603	1659	1150	1832	1560	768	1342	1734	1160	1991	2101	2687	2266	1181	1531	1378	1722	1519	1604	2085	1516	1314	1145	2776	1768	2090	1870	1927	1791	1751	1781	1750	1721	952	1584	1355	1647	992	916	1787	1815	2319	1886	2209	1345	1690	1936	1941	677
LSU-rRNA_Hsa	5271	5500	2898	4383	1979	4028	3379	4386	2932	4670	4227	3742	4988	1705	2730	2976	4879	1578	2913	4050	2906	3606	5683	8252	6069	6471	3527	2290	5060	3586	2302	3833	2341	2503	3726	3600	4022	1674	2220	3937	5143	10594	8854	4645	6453	9148	7584	6221	7877
LTR101_Mam	19	34	19	24	15	20	22	34	35	23	17	13	25	13	26	28	30	13	20	20	24	13	3	21	80	81	105	48	56	46	44	38	15	18	30	14	9	19	12	59	55	147	51	56	41	21	59	29	75
LTR102_Mam	3	5	7	5	1	1	3	2	1	6	5	6	9	8	9	4	14	9	6	2	5	2	1	4	8	4	4	2	11	2	7	6	3	5	6	4	3	3	1	6	6	6	3	10	2	5	1	12	28
LTR103_Mam	0	0	0	1	0	2	0	0	0	1	0	0	0	0	0	0	3	1	0	0	0	0	0	0	0	0	0	0	0	1	0	1	0	0	0	0	0	0	0	0	0	0	0	0	0	0	0	1	0
LTR103b_Mam	113	125	31	143	103	46	69	54	24	49	72	123	97	61	108	110	71	111	130	159	123	137	204	287	99	77	37	97	71	68	95	49	49	36	39	31	125	64	81	123	108	187	71	135	124	99	80	117	68
LTR104_Mam	138	199	175	178	115	101	101	100	132	174	214	231	375	166	275	235	199	247	209	269	183	174	114	284	99	188	96	76	74	127	109	125	127	89	153	107	96	90	87	165	151	265	165	134	188	169	184	194	50
LTR105_Mam	0	0	2	1	1	1	3	0	0	1	0	1	1	1	0	0	0	3	0	0	1	4	0	0	0	0	1	0	0	0	0	0	0	1	1	0	0	0	0	4	0	1	1	0	0	1	0	1	5
LTR106_Mam	5	4	3	5	1	0	3	5	3	4	11	8	12	3	1	7	4	9	4	8	2	3	9	4	1	7	1	7	5	1	8	7	3	9	11	1	2	0	3	0	1	9	4	3	6	4	0	4	0
LTR107_Mam	0	0	0	0	0	3	0	0	1	2	0	0	0	0	0	0	2	2	4	0	3	6	0	6	0	1	0	0	0	0	0	0	0	0	0	0	0	0	0	1	0	6	0	6	0	0	0	2	2
LTR108a_Mam	2	0	5	5	2	3	3	5	0	6	5	5	4	2	6	4	14	1	9	15	4	4	5	2	5	9	1	6	3	0	0	4	1	0	8	5	0	2	0	0	0	2	2	0	12	8	1	1	3
LTR108b_Mam	0	3	0	0	3	0	2	0	0	0	0	1	0	1	2	0	0	3	2	1	2	0	0	2	0	2	1	1	0	0	0	2	0	0	0	0	1	1	1	0	0	4	0	1	0	7	0	0	0
LTR108c_Mam	0	0	0	0	0	0	0	0	0	0	0	0	0	0	0	0	2	0	0	0	0	0	0	0	0	0	0	0	0	0	0	0	0	0	0	0	0	0	0	0	0	0	0	0	0	0	0	0	0
LTR108d_Mam	0	0	0	1	1	0	0	1	0	0	0	0	0	0	0	0	2	5	0	2	0	3	0	2	0	0	0	0	1	0	2	0	0	0	0	0	0	0	0	0	1	0	0	0	0	0	0	1	0
LTR108e_Mam	52	129	106	73	49	47	57	89	73	68	73	76	126	60	77	65	61	69	85	108	127	91	56	147	100	121	131	44	57	52	52	63	62	61	88	64	103	46	70	125	57	169	129	121	86	168	142	117	13
LTR109A2	3	0	1	0	0	2	0	0	0	0	0	0	0	0	4	0	5	4	3	1	1	1	2	8	0	0	1	1	2	1	0	2	2	0	0	1	0	1	0	2	1	1	0	1	0	6	0	1	9
LTR10_RN	36	21	25	14	13	21	9	16	26	22	45	12	18	9	35	17	69	62	47	72	30	17	27	80	11	21	14	11	6	8	28	22	7	13	25	16	21	19	8	26	32	50	43	69	29	30	28	36	165
LTR16A	28	42	30	50	56	47	44	60	27	78	50	49	91	42	49	42	75	68	59	65	52	57	24	85	97	85	36	40	40	43	36	46	51	23	52	22	34	24	17	39	42	67	64	51	66	54	57	86	75
LTR16A1	8	13	8	11	13	16	8	13	16	23	23	14	22	9	27	23	34	24	17	41	40	28	13	44	11	8	9	3	4	12	6	7	6	6	10	4	11	9	9	24	19	61	32	27	42	18	27	29	20
LTR16A2	124	241	130	126	134	76	71	164	119	135	148	206	370	139	210	124	166	206	241	228	173	217	189	236	78	178	171	114	151	100	120	147	126	98	173	89	169	72	117	125	183	287	153	188	183	226	261	284	71
LTR16B	0	11	0	0	3	3	3	6	3	5	4	0	5	0	1	1	9	7	5	0	3	2	4	4	1	2	0	7	6	1	0	2	0	8	2	3	0	2	0	5	1	4	3	1	8	0	2	8	1
LTR16B1	1	2	2	1	2	1	5	6	2	2	0	5	0	9	0	0	6	8	0	1	0	0	3	0	1	1	0	1	2	5	2	2	0	0	0	1	0	2	0	3	0	0	0	0	8	2	2	4	2
LTR16B2	8	2	8	9	4	7	7	2	7	3	3	12	8	6	0	1	7	14	12	6	2	0	0	12	8	12	7	5	1	8	0	4	11	7	3	0	4	5	2	0	14	19	12	3	7	13	5	12	26
LTR16C	137	215	161	102	76	53	79	107	100	106	173	92	237	167	175	186	186	193	158	107	113	57	32	123	100	116	107	46	82	136	95	105	76	94	148	69	73	42	56	107	73	220	104	93	139	176	208	190	100
LTR16D	2452	5038	4035	3321	3172	1706	2896	5290	3815	3987	2887	2608	4196	2216	3525	2553	3053	3270	2704	3723	4282	2933	2136	5263	4090	8168	5939	2255	3923	2988	2651	5211	4589	2752	6014	4221	3460	1849	2075	4751	3061	7975	4481	4027	4332	7378	7339	6500	3148
LTR16D1	14	21	33	16	25	26	10	18	19	33	37	58	51	25	47	33	40	34	50	37	25	19	40	29	18	17	11	14	11	11	10	18	11	2	15	8	23	16	9	21	20	36	13	10	19	13	10	36	19
LTR16D2	0	0	0	0	6	0	2	0	0	0	0	1	2	0	0	0	0	1	0	0	0	0	0	0	0	0	0	0	5	0	0	0	0	0	0	0	0	0	0	0	0	0	3	3	1	0	1	1	0
LTR16E1	7	5	3	4	4	3	2	8	2	2	3	1	7	14	6	22	19	26	16	9	3	4	5	9	5	12	1	1	5	7	5	3	0	7	6	3	11	3	10	15	10	13	9	2	14	9	17	16	25
LTR16E2	29	16	8	13	10	8	22	20	8	13	13	21	24	3	1	2	10	13	3	12	17	7	10	34	21	42	23	16	19	19	24	22	15	14	17	11	28	19	3	20	16	57	29	21	25	24	14	34	60
LTR27C	0	0	0	0	0	0	0	0	0	0	0	0	0	0	0	0	0	0	0	0	0	0	0	0	0	0	0	0	0	0	0	0	0	0	0	0	0	0	0	0	0	0	0	0	0	0	0	1	0
LTR28	0	0	0	0	0	1	0	0	0	0	0	0	0	0	0	0	1	1	0	0	0	0	0	0	0	0	0	0	0	0	0	0	0	0	0	0	0	0	0	0	1	0	0	0	0	0	0	2	0
LTR28B	1	3	0	3	4	3	4	1	2	3	9	1	4	0	0	3	2	6	0	2	4	5	1	3	7	1	3	0	0	4	0	3	0	1	7	3	5	0	0	2	8	11	1	1	9	6	13	5	34
LTR29	0	0	0	0	0	0	0	0	0	0	0	0	0	0	0	0	0	3	0	0	0	0	0	0	0	0	0	0	0	0	0	0	0	0	0	0	0	0	0	0	0	0	0	0	0	0	0	0	0
LTR31	10	7	12	10	6	13	9	3	12	6	8	9	7	5	9	5	12	14	16	18	18	6	7	12	6	12	24	6	5	12	10	5	9	9	9	16	3	8	3	15	10	18	13	9	16	19	18	13	13
LTR32	0	0	1	1	0	0	0	0	0	0	0	1	0	0	0	0	0	0	0	0	1	0	0	0	0	0	0	0	0	0	0	0	0	0	0	0	0	0	0	0	0	0	0	0	0	0	0	0	0
LTR33	12	29	20	26	26	33	9	38	31	29	36	42	58	17	32	28	66	69	23	17	30	27	15	33	24	35	20	25	27	15	40	28	29	23	37	22	13	12	11	14	22	30	28	36	15	37	51	46	49
LTR33A	46	12	13	8	20	7	12	27	8	12	30	46	19	24	15	30	22	39	27	37	24	17	17	29	27	25	17	16	45	21	15	16	20	14	21	14	9	9	5	36	4	30	21	30	35	14	11	22	27
LTR33A_	10	17	14	20	12	10	22	21	17	18	32	22	10	7	23	8	39	23	10	28	29	15	14	21	43	26	27	16	25	18	11	9	10	17	17	24	14	11	9	19	16	57	13	21	44	26	22	28	33
LTR33B	21	7	11	11	12	13	21	26	14	5	24	41	15	6	28	9	15	10	13	20	19	16	13	30	27	48	40	27	36	12	12	35	14	6	24	20	17	13	11	41	26	66	42	32	23	32	35	38	35
LTR33C	35	21	22	26	42	20	29	48	19	49	53	67	37	27	21	41	21	24	25	33	36	29	20	46	13	34	17	18	19	19	24	32	29	13	22	24	26	7	11	20	18	49	40	23	40	46	31	47	54
LTR34	0	0	0	0	0	0	0	0	0	0	0	0	5	0	0	0	0	0	0	0	0	0	0	0	0	0	0	0	0	0	0	0	0	0	1	0	0	0	1	0	0	0	0	1	2	0	0	2	0
LTR37-int	65	83	71	88	87	21	69	58	45	55	102	59	51	72	148	53	167	76	71	77	35	41	51	69	39	53	35	16	37	58	50	40	39	17	19	17	27	21	6	2	30	72	26	29	37	49	39	42	194
LTR37A	1	18	29	15	12	11	6	22	23	42	9	19	35	31	23	54	47	32	68	25	26	45	23	25	13	11	6	2	13	8	6	6	8	3	11	7	10	1	7	17	6	13	2	15	8	18	8	31	36
LTR37B	8	14	10	14	10	6	12	8	6	15	9	16	21	22	13	39	47	56	58	25	59	32	22	20	6	16	6	7	10	8	3	7	6	9	12	3	14	10	7	34	34	22	33	17	23	53	25	29	29
LTR39	0	0	0	0	0	0	0	0	0	0	0	0	0	0	0	0	1	0	0	0	0	0	0	0	0	0	0	0	0	0	0	0	0	0	0	0	0	0	0	0	0	0	0	0	0	0	0	0	0
LTR40A1	0	3	0	0	2	1	2	7	8	2	0	4	0	4	1	0	3	0	0	0	6	0	2	3	0	0	0	0	4	0	2	2	0	1	0	0	0	0	0	0	2	0	0	1	0	0	0	1	0
LTR40a	31	30	10	20	31	17	21	16	11	15	34	32	24	21	26	25	42	24	16	34	30	34	10	37	16	33	34	22	27	26	22	15	28	12	18	22	18	19	20	14	61	99	47	34	40	32	41	27	94
LTR40b	3	16	22	3	17	10	15	14	5	15	6	12	13	12	4	23	20	24	5	11	8	23	2	18	3	11	6	8	7	13	8	5	11	7	8	0	5	5	0	5	9	32	8	2	14	4	13	25	42
LTR40c	23	17	12	16	17	9	17	8	11	14	30	15	33	20	30	22	35	40	46	60	43	25	19	33	22	15	25	13	15	16	17	17	12	11	14	15	12	10	11	28	14	26	25	26	17	41	17	25	4
LTR41	16	16	11	4	7	9	10	12	8	3	6	28	13	3	8	18	33	27	22	18	22	19	9	16	33	18	18	11	14	5	16	10	7	11	9	12	14	14	11	11	19	34	36	12	15	8	28	13	13
LTR41B	62	74	47	47	54	21	34	36	28	58	47	70	89	59	64	60	86	66	48	47	43	32	30	73	45	45	47	29	38	52	29	43	54	32	48	34	39	44	32	32	59	73	30	56	51	46	53	52	61
LTR44	0	0	0	0	0	0	0	0	0	0	0	0	0	0	0	0	0	0	0	0	0	0	0	0	0	0	0	0	0	0	0	0	0	0	0	0	0	0	0	0	0	0	0	0	0	0	0	1	0
LTR45	0	0	0	0	0	0	0	0	1	0	0	0	1	1	1	2	2	5	4	9	1	5	1	5	3	2	2	3	0	4	0	0	2	0	3	0	4	2	0	1	1	4	0	3	4	2	3	1	4
LTR45C	0	0	0	0	1	0	0	0	0	0	1	2	0	3	0	2	1	1	0	0	0	0	0	0	0	0	0	1	0	0	1	0	0	0	0	0	0	0	1	0	0	8	0	0	2	0	0	0	4
LTR48	42	55	135	32	91	85	32	45	62	134	147	202	197	58	257	169	213	187	257	233	256	118	65	179	23	16	11	18	17	41	62	70	60	37	40	47	67	58	28	44	60	66	46	45	36	45	92	206	67
LTR48B	5	13	6	7	11	8	9	7	7	9	16	13	11	8	1	13	18	21	16	18	14	6	3	14	4	12	3	0	5	10	7	4	14	0	4	12	12	23	2	26	7	13	11	10	6	5	11	58	11
LTR50	5	28	57	25	12	19	20	42	16	32	19	20	61	17	47	31	40	44	41	39	50	22	23	44	34	44	33	23	37	5	26	52	27	20	36	18	60	24	32	33	39	49	31	47	52	58	42	49	45
LTR52	18	23	27	14	40	16	15	17	13	23	55	67	52	27	65	14	49	43	53	36	16	39	43	35	17	19	22	27	10	19	16	28	15	16	13	17	20	16	8	19	18	21	13	25	21	10	36	22	8
LTR52-int	5	10	8	0	11	8	7	6	9	0	6	44	17	3	23	5	23	9	7	9	3	5	13	5	15	5	6	5	6	0	0	0	0	4	0	4	8	8	15	3	3	2	13	3	15	6	11	4	15
LTR53	7	0	1	1	2	1	1	5	3	2	3	4	10	3	5	8	8	10	17	1	4	5	1	11	2	9	2	1	1	3	4	6	0	3	0	0	4	3	1	1	4	14	1	0	1	11	1	11	8
LTR53B	0	0	0	0	0	2	0	1	0	0	1	0	0	0	1	0	4	7	0	0	0	0	0	0	0	0	0	0	1	0	1	0	0	0	0	0	0	0	0	0	0	0	0	0	0	0	0	1	0
LTR55	7	10	4	13	14	4	8	3	2	4	8	17	4	3	5	5	7	9	3	3	7	5	2	5	5	8	12	2	4	1	8	3	3	1	7	0	8	6	0	3	7	5	6	1	4	7	11	15	8
LTR58	0	0	2	0	0	0	0	0	0	0	0	0	0	0	0	0	0	0	0	0	0	0	0	0	0	0	0	0	0	0	0	0	0	0	0	0	0	0	0	0	0	0	0	0	0	0	0	0	1
LTR64	0	0	0	0	0	0	0	0	0	0	0	0	0	0	0	0	1	0	0	0	0	0	0	0	0	0	0	0	0	0	0	0	0	0	0	0	0	0	0	0	0	0	0	0	0	0	0	0	0
LTR65	18	12	23	14	2	10	17	17	4	15	19	14	31	19	17	19	25	31	5	19	12	4	4	9	18	16	14	21	15	29	4	6	8	8	19	15	12	15	8	12	19	17	13	18	8	11	6	19	13
LTR67B	74	63	29	48	122	58	62	83	25	30	88	131	164	62	196	165	168	128	190	122	171	104	159	259	80	71	39	47	40	40	58	62	37	44	32	37	77	60	53	53	93	179	69	127	121	111	92	115	75
LTR68	0	0	0	1	1	2	0	0	0	1	5	1	0	0	0	0	0	4	0	0	0	0	3	1	1	0	1	0	0	0	0	0	0	0	3	0	0	0	0	0	2	0	3	0	0	2	0	3	0
LTR69	0	0	0	0	0	0	0	0	0	0	0	0	0	0	0	0	0	3	0	0	0	0	0	0	0	0	0	0	0	0	0	0	0	0	0	0	0	0	0	0	0	0	0	0	0	0	0	0	0
LTR72_RN	35	34	32	23	25	22	18	19	22	32	39	48	52	37	31	49	31	70	99	63	44	54	30	59	16	9	18	32	18	26	26	39	28	13	26	10	25	13	10	53	26	83	97	49	69	31	70	33	80
LTR73	3	3	1	0	0	4	3	2	2	7	1	0	5	0	1	4	7	10	3	1	1	2	0	2	4	1	2	1	1	2	8	1	1	0	3	5	0	1	0	1	5	0	2	7	0	0	10	6	0
LTR75	0	2	4	0	2	6	0	1	0	5	0	4	0	0	6	1	1	4	4	0	0	9	1	2	1	0	0	1	1	0	0	0	0	0	0	0	0	0	1	0	0	0	2	1	1	2	5	3	0
LTR75B	0	1	0	0	0	0	1	0	0	2	0	0	0	0	0	1	0	2	0	0	0	0	1	2	3	0	1	2	0	0	0	0	0	0	0	0	0	0	0	0	0	6	0	0	0	0	2	0	0
LTR77	0	0	0	0	0	0	0	0	0	0	0	0	0	0	0	0	0	0	0	0	0	0	0	0	0	0	0	0	0	0	0	0	0	0	0	0	0	0	0	0	0	0	0	0	0	0	0	0	0
LTR78	43	57	20	45	93	49	76	49	73	72	66	94	65	30	77	45	75	51	78	128	83	94	137	172	96	122	116	83	113	49	50	45	79	30	52	38	144	72	43	71	89	177	123	193	78	167	108	110	59
LTR78B	212	385	322	209	187	194	247	288	202	278	196	341	345	240	486	350	299	386	264	326	476	344	323	598	233	360	269	162	233	142	195	213	173	220	206	211	296	174	211	291	245	549	454	297	341	580	383	457	93
LTR79	38	33	31	31	20	15	16	28	16	20	7	26	29	34	30	36	25	44	34	21	41	37	27	52	11	25	16	18	23	17	12	6	15	12	26	22	20	13	6	20	8	34	21	23	22	35	27	34	17
LTR80A	0	0	0	1	4	3	0	0	1	6	0	3	4	2	0	0	0	2	0	2	0	0	0	1	2	3	1	1	1	5	2	0	0	0	0	1	0	0	1	0	1	1	0	0	0	0	7	0	0
LTR80B	1	0	0	0	0	1	0	0	0	1	0	0	0	0	1	0	2	0	1	0	0	1	0	0	0	0	0	0	0	0	0	0	0	0	0	1	0	0	0	0	0	0	0	0	0	0	0	0	0
LTR81	2	0	2	0	0	0	0	0	0	0	0	0	14	0	0	0	2	2	1	0	0	0	0	2	0	0	0	0	0	0	0	0	0	0	1	0	0	0	0	0	0	2	0	0	0	0	1	2	0
LTR81A	2	1	1	7	8	3	2	7	6	3	7	7	3	0	0	1	4	6	2	1	2	2	4	10	6	5	10	1	3	8	2	3	2	0	2	0	0	2	2	3	1	2	1	4	1	4	11	7	4
LTR81B	0	0	1	1	1	1	1	1	0	1	2	2	5	0	1	2	6	4	1	1	4	0	2	2	2	2	3	1	0	1	0	0	3	3	0	1	0	0	0	2	0	0	1	0	0	3	3	4	3
LTR81C	7	6	3	2	2	4	5	1	4	7	8	10	11	3	3	3	1	6	3	6	10	4	9	11	9	12	4	3	7	8	6	3	2	3	4	8	10	6	4	7	3	3	10	5	11	9	2	9	32
LTR82A	642	719	411	399	461	267	393	463	319	471	631	802	906	367	548	617	490	435	456	523	496	424	379	838	383	457	331	262	335	428	418	297	300	245	384	257	318	232	180	249	327	487	276	310	432	575	466	400	352
LTR82B	4	1	0	1	0	3	1	7	1	0	1	5	1	0	2	6	2	6	2	4	0	11	3	1	1	1	0	0	0	1	0	4	0	0	0	0	0	0	0	1	1	0	4	1	0	2	2	3	1
LTR83	0	0	6	0	0	0	1	3	5	1	5	0	0	0	4	0	1	4	1	4	0	0	3	5	0	0	0	7	0	0	1	3	9	7	0	0	0	4	1	13	2	13	1	1	1	0	0	4	26
LTR84a	0	0	0	0	0	1	0	0	0	0	0	0	0	0	0	0	3	4	0	0	0	0	0	0	0	0	1	0	0	0	0	0	0	0	0	0	0	0	0	0	0	1	0	1	2	0	0	1	12
LTR84b	0	2	0	2	5	3	0	2	1	3	6	0	1	3	1	0	5	9	3	5	1	0	5	3	2	2	1	0	2	2	3	0	4	0	3	1	0	3	2	3	1	0	6	1	3	3	8	5	3
LTR85a	14	18	3	5	8	3	2	4	8	6	6	13	9	6	4	0	10	6	5	9	5	7	1	16	18	28	11	9	13	4	4	4	8	4	7	6	13	5	2	3	17	16	12	14	15	11	11	10	27
LTR85b	0	0	0	0	0	0	1	0	0	2	1	0	0	1	0	0	0	2	2	0	0	0	0	0	0	1	4	0	3	0	7	1	0	3	0	1	2	1	0	0	0	0	2	2	1	1	6	1	12
LTR85c	0	11	0	5	4	0	0	1	0	2	4	3	0	6	4	2	7	8	1	3	0	2	0	6	0	11	2	0	4	0	0	5	0	4	3	10	4	2	2	3	2	1	5	7	11	8	2	9	3
LTR86A1	0	1	1	2	0	1	0	0	0	2	0	4	0	1	3	2	6	6	0	1	3	0	0	1	1	0	0	0	0	0	0	0	0	0	3	1	2	1	0	2	2	0	0	0	0	1	0	3	9
LTR86A2	0	2	0	1	0	3	1	0	0	0	0	0	0	0	0	0	2	0	0	0	0	0	0	1	0	0	0	0	0	0	0	0	0	0	0	0	0	2	0	0	0	0	0	0	0	0	0	1	6
LTR86B1	8	14	19	13	7	11	7	9	8	11	8	9	15	21	20	22	27	31	15	11	29	35	15	21	5	11	6	5	2	4	5	4	4	1	5	8	6	2	6	6	8	31	16	9	12	24	11	9	13
LTR86B2	0	0	0	0	0	0	0	0	0	0	0	0	0	0	0	0	0	2	0	0	0	0	0	0	0	0	0	0	0	0	0	0	0	0	0	0	0	0	0	0	0	0	0	0	0	0	0	0	0
LTR86C	0	0	1	0	0	2	0	0	0	0	1	0	0	0	0	0	0	3	5	0	1	6	0	3	0	2	1	1	0	0	0	1	0	0	0	0	0	0	0	0	2	0	0	0	0	0	0	1	0
LTR87	39	53	45	71	38	13	23	36	20	22	41	86	102	47	81	60	80	82	98	44	24	28	30	58	22	34	24	11	23	44	22	12	16	8	16	15	27	24	7	13	22	26	27	23	22	28	27	43	7
LTR88a	5	5	9	7	4	4	4	5	3	7	6	11	9	5	7	6	2	8	11	10	2	5	9	9	1	10	2	4	13	11	8	6	3	1	7	7	12	1	1	7	9	4	6	3	9	4	5	5	7
LTR88b	1	9	4	0	2	2	3	2	2	7	3	6	0	1	1	4	0	3	11	3	5	4	2	14	2	8	7	1	1	1	0	6	1	7	5	1	2	4	1	5	5	1	7	3	1	5	9	10	0
LTR88c	2	10	17	4	1	5	0	4	4	10	1	0	6	3	12	1	5	2	14	14	4	4	2	11	6	18	9	1	1	6	7	7	4	5	13	3	0	6	2	13	0	10	4	1	4	11	5	17	2
LTR89	11	0	4	4	5	8	1	3	3	5	5	6	5	7	1	1	1	5	13	2	4	9	2	6	10	12	9	6	3	2	0	8	13	3	4	7	2	0	5	2	2	3	10	5	2	4	21	5	6
LTR9	0	0	0	0	0	0	0	0	0	0	0	0	0	0	0	0	0	0	0	0	0	0	0	0	0	0	0	0	0	0	0	0	0	0	0	0	0	0	0	0	0	0	0	0	0	0	0	0	0
LTR90A	0	2	0	0	0	0	0	0	0	0	0	0	0	0	0	0	1	5	0	0	0	0	0	0	0	0	0	0	0	0	0	0	0	0	0	0	0	0	0	0	0	1	0	0	0	0	0	1	0
LTR90B	0	0	0	0	0	0	0	1	0	0	0	2	0	2	0	0	0	2	0	0	0	0	2	0	0	1	0	0	0	0	1	1	0	1	0	0	0	0	0	0	0	0	2	0	0	0	0	2	0
LTR91	0	1	0	3	0	0	0	0	0	0	0	3	5	1	7	1	1	4	7	1	0	1	1	4	0	0	0	0	0	0	0	3	0	0	0	0	1	0	1	0	0	0	0	0	0	0	2	3	2
LTRIS2	767	960	812	957	752	611	613	680	730	934	1131	1226	1453	919	1107	1139	1209	1171	1847	1163	1150	953	927	1532	689	809	699	754	712	986	734	818	665	374	881	550	777	545	452	812	659	1246	737	838	841	926	1220	1631	1398
LTRIS3	14	29	29	36	20	26	9	27	15	33	16	34	54	37	40	53	58	45	63	43	52	52	42	33	28	16	33	19	20	35	41	24	22	19	28	23	37	21	23	21	26	37	35	44	40	29	41	77	60
LTRIS4	1	0	1	0	2	0	0	1	0	0	4	1	0	0	0	2	0	0	1	0	1	2	0	0	0	1	2	2	0	1	0	0	1	3	1	0	2	0	0	0	1	0	3	0	0	1	1	0	3
LTRIS4A	54	67	43	67	94	81	57	71	66	72	85	111	50	28	63	104	87	62	68	100	69	86	61	122	76	82	68	87	100	72	82	68	73	33	76	28	63	64	19	57	97	118	62	108	75	71	47	132	133
LTRIS4B	0	0	0	0	0	0	0	0	0	1	0	0	0	0	0	0	1	1	0	0	0	0	0	0	0	2	0	0	0	0	0	1	0	0	2	0	1	0	0	0	0	0	0	0	0	0	0	0	1
LTRIS5	1	2	2	0	0	1	7	1	1	0	0	0	15	0	0	0	1	7	2	12	6	6	2	6	2	4	1	1	3	3	4	2	0	3	5	3	1	1	5	5	4	8	3	3	3	9	6	4	9
LTRIS6	3	8	3	3	5	4	2	6	3	9	3	10	1	2	5	3	9	9	5	9	4	4	5	7	7	4	5	1	13	9	5	7	7	3	9	6	4	4	3	11	7	17	2	13	11	4	14	6	13
LTRIS_Mm	0	0	0	0	0	3	1	1	0	0	0	0	0	0	0	0	22	12	1	0	0	5	1	0	0	1	0	0	1	1	2	0	1	0	0	0	0	0	0	0	2	0	1	0	1	1	2	13	34
LTRIS_Mus	65	71	52	100	185	136	161	219	139	174	253	378	140	72	113	89	132	125	119	245	216	285	160	395	203	136	175	124	176	132	145	130	129	114	129	147	191	136	154	222	226	294	294	310	236	294	211	284	270
Looper	13	10	8	15	13	5	9	8	3	8	13	17	21	1	9	15	13	17	12	10	8	15	5	7	20	13	7	6	1	12	2	12	3	0	6	5	12	7	3	12	21	18	6	10	4	16	12	13	1
Lx	262	348	672	283	466	436	264	314	251	598	684	842	811	422	1563	1150	1681	1568	1876	1610	1212	1098	1116	867	335	511	311	209	284	375	384	380	378	241	418	360	482	380	273	424	565	1051	696	534	522	525	662	1768	1086
Lx10	322	292	365	290	262	144	177	258	216	308	271	335	601	354	667	355	520	594	502	340	311	383	257	516	205	246	186	139	179	200	171	192	128	119	182	170	220	149	108	249	179	350	296	296	298	300	337	476	225
Lx2	294	272	197	308	191	214	143	178	162	306	341	299	269	154	284	233	510	630	359	261	225	279	220	394	203	265	209	169	235	305	215	236	137	159	292	227	170	121	81	229	271	454	307	309	284	337	397	596	545
Lx2A	25	7	17	23	7	10	7	22	7	24	11	20	33	9	34	24	52	38	15	19	28	18	46	49	17	27	6	17	17	25	12	10	6	6	10	16	28	16	10	17	9	38	16	23	21	42	27	26	38
Lx2A1	16	49	34	37	39	23	21	23	21	34	16	52	16	66	29	39	80	81	37	62	52	25	38	78	16	35	49	22	41	22	32	24	38	22	36	26	65	53	14	49	35	86	52	87	34	41	79	70	75
Lx2B	60	122	87	98	87	92	68	100	73	132	109	89	155	71	119	102	242	219	100	124	129	105	117	159	121	119	110	43	134	70	128	101	96	77	90	95	120	46	82	95	101	205	111	127	123	150	188	305	119
Lx2B2	379	673	494	383	357	369	369	455	474	478	489	706	753	265	624	555	820	707	626	591	515	523	505	720	416	597	425	306	409	358	311	402	355	237	343	411	445	256	216	433	376	676	524	526	498	461	726	729	633
Lx3A	692	715	437	729	651	510	683	898	615	1034	1163	1670	1002	494	825	671	886	711	644	1097	942	1019	877	1406	927	981	853	795	856	735	795	632	638	583	706	588	952	570	518	911	818	1293	1083	1195	1132	1231	1300	1133	650
Lx3B	131	377	225	170	183	126	202	265	194	241	242	300	247	176	189	210	301	334	289	301	295	285	192	486	285	453	348	165	188	184	204	283	211	199	264	199	230	152	132	384	233	670	450	364	294	467	535	464	1172
Lx3C	1022	1056	863	792	1229	886	961	1369	1004	1172	1081	1843	1343	852	1183	1090	1339	1310	1380	1371	1401	1440	1133	1787	839	975	868	508	934	646	827	708	592	548	790	605	1238	572	683	1014	867	1603	1019	825	1321	1257	1320	1609	1066
Lx3_Mus	5453	7137	5183	4921	4206	1950	3461	3745	2611	5032	6453	6930	8588	3599	7313	4548	6777	4841	4248	5988	3303	4059	3802	7240	5116	5809	4122	3989	6944	4364	5411	4402	4625	2944	4255	3958	3491	3126	1690	3011	3135	5267	4821	5561	4396	4764	5083	6577	1440
Lx4A	968	1308	1065	1139	1173	844	1222	987	866	1335	1480	1638	1534	571	1287	1058	1584	1234	1121	1122	1154	1006	828	1860	1299	1402	979	733	846	949	1027	1091	970	629	938	655	831	658	456	767	1070	1643	1172	1280	1083	1038	1138	1517	978
Lx4B	172	184	191	198	208	88	136	120	129	179	199	237	386	215	303	235	383	366	214	241	188	144	123	332	131	161	112	87	150	166	119	106	140	124	153	89	167	106	72	142	139	276	224	201	200	193	245	321	285
Lx5	248	281	207	180	317	241	238	236	238	353	344	320	518	258	462	420	678	816	396	388	376	386	416	522	353	396	292	221	284	282	201	272	217	173	289	223	302	202	151	294	259	527	419	376	308	436	432	781	1271
Lx5b	406	473	386	386	369	280	360	553	412	395	426	572	699	535	634	556	777	785	780	531	710	683	508	831	511	580	498	327	382	322	304	356	243	239	324	280	572	288	329	420	522	944	504	464	611	704	688	844	1535
Lx5c	252	409	321	279	285	224	264	357	277	362	315	381	508	263	448	381	592	641	404	458	421	306	394	557	342	571	403	181	304	272	289	275	264	195	451	217	347	177	170	382	367	542	526	382	368	545	776	835	506
Lx6	466	656	602	407	451	402	390	640	489	576	481	1045	612	307	601	439	873	968	650	719	671	714	453	1163	420	551	414	264	440	388	340	415	338	273	417	421	459	232	266	482	370	774	570	543	564	743	965	1045	923
Lx7	938	1164	933	1052	1233	719	835	1062	840	1138	1426	1745	1515	828	1440	1240	1982	1817	1755	1473	1572	1312	1309	2229	1346	1476	1166	956	1173	1133	1088	1124	995	681	1115	896	1191	951	605	895	1236	1661	1512	1583	1105	1556	2089	2818	1894
Lx8	6070	6321	5757	5784	5425	3390	4480	5514	3780	6053	6967	8879	9571	4887	7081	6902	8284	8041	6559	7897	6017	6539	5431	9279	5105	5344	4363	4532	5823	4743	5327	4420	3879	2820	5086	3348	4330	3567	2522	4313	4982	7539	4968	5790	5910	6138	6225	7430	3455
Lx8b	629	746	804	770	664	445	499	593	498	655	819	1071	1143	623	1007	752	1356	1271	1150	935	759	821	641	1142	671	782	614	484	594	690	644	658	512	367	685	434	620	470	309	623	623	966	721	704	766	731	987	1225	785
Lx9	2161	2389	2134	2026	1434	1030	1306	1611	1159	1761	1936	2572	4030	2046	2759	2478	3465	3033	3338	2462	1948	2173	1508	3104	1304	1645	1242	887	1184	1534	1094	1303	1044	726	1234	908	1141	735	624	1234	1294	1975	1880	1528	1697	2134	2386	2665	1687
MADE2	0	0	0	1	1	2	0	3	2	0	0	2	1	1	2	0	2	4	1	0	4	0	1	2	2	5	0	1	0	1	0	0	0	0	0	0	2	1	1	2	2	1	0	2	1	0	0	4	1
MARNA	417	617	414	577	249	141	403	373	273	367	556	556	848	354	353	299	491	326	431	364	267	308	201	485	307	464	280	244	333	446	274	327	204	157	249	219	185	114	124	166	228	395	247	214	392	380	328	332	413
MER101B	3	1	3	2	0	0	1	0	0	1	2	3	0	2	0	1	1	2	2	1	0	4	1	4	0	0	1	0	0	0	0	0	1	0	0	0	0	2	0	2	2	0	1	4	0	0	3	1	0
MER102a	401	505	357	447	391	178	311	327	273	471	520	584	614	284	391	390	388	367	376	559	355	330	305	634	442	466	397	375	499	373	348	373	384	203	456	277	369	232	201	289	348	482	386	469	273	420	451	449	166
MER102b	19	11	13	6	25	18	14	13	13	23	20	22	69	20	30	30	23	26	24	11	9	18	12	14	23	14	20	13	7	6	15	19	3	8	13	7	10	19	7	8	4	21	15	16	16	2	16	34	87
MER102c	0	1	1	1	4	2	1	2	0	0	4	1	0	3	4	1	6	9	12	10	0	0	0	1	2	0	3	0	3	0	0	1	3	0	0	0	2	1	0	0	0	5	2	4	1	1	1	9	0
MER103C	173	303	219	213	173	75	163	221	159	231	238	292	231	133	80	136	215	198	116	172	124	96	110	229	137	145	159	93	130	170	204	180	129	112	172	116	122	52	74	157	95	114	86	90	143	180	147	130	95
MER104	0	10	6	6	7	7	1	3	6	9	10	5	21	9	10	13	9	8	26	7	10	7	3	12	4	15	2	3	4	7	1	6	5	9	4	1	5	10	5	14	6	6	11	6	10	5	2	11	2
MER105	4	6	1	0	0	1	1	0	0	0	0	0	0	4	0	0	4	2	1	0	0	0	2	0	2	1	3	2	2	0	0	4	1	0	0	0	0	0	0	0	2	2	3	1	1	0	1	2	0
MER106A	6	4	9	3	4	4	3	12	5	9	6	8	15	2	12	5	18	16	8	11	7	5	5	8	11	5	1	3	2	2	9	6	5	1	7	4	1	3	2	8	1	14	12	3	2	5	9	14	15
MER106B	2	7	4	2	7	0	2	2	5	7	9	10	5	2	2	0	9	4	11	11	1	2	4	6	4	4	2	1	9	0	0	2	0	0	2	3	5	1	4	0	1	4	6	2	4	4	4	10	2
MER110	3	0	0	1	0	1	1	0	1	2	5	1	3	3	4	1	1	4	4	1	0	1	1	2	1	0	0	1	0	0	3	1	1	0	0	0	1	1	4	1	0	1	0	0	0	0	0	3	0
MER110-int	0	0	0	0	0	0	0	0	0	0	0	0	0	0	0	0	0	0	0	0	0	0	0	0	0	0	0	0	0	0	0	0	0	0	0	0	0	0	0	0	0	0	0	0	0	0	0	0	0
MER110A	1	0	0	2	3	3	0	0	0	0	0	0	0	0	5	0	4	8	3	2	1	1	1	2	2	0	2	0	3	6	0	3	0	0	3	2	3	0	0	0	2	0	0	0	4	3	0	6	0
MER112	8	3	3	2	3	6	7	6	4	10	12	9	24	11	20	8	19	19	44	23	7	7	8	12	1	8	13	1	4	9	5	8	8	1	19	1	5	6	4	9	19	39	9	7	25	11	8	12	22
MER113	28	60	32	30	23	22	29	39	28	18	19	39	54	26	54	19	46	44	28	33	31	30	18	37	50	54	81	17	50	43	47	43	25	37	26	19	9	15	15	45	35	71	52	32	42	41	54	58	73
MER113A	11	0	4	3	3	2	1	2	1	1	1	4	9	8	5	2	11	3	2	3	5	2	2	7	1	0	1	0	0	1	2	2	1	1	2	1	1	0	0	2	1	1	1	2	6	2	9	1	0
MER113B	0	0	0	2	0	1	1	3	0	0	0	2	0	0	0	0	2	0	0	2	0	0	1	0	0	0	0	1	0	0	0	1	0	0	0	0	0	0	0	0	0	0	0	0	0	0	0	0	0
MER115	0	4	0	0	0	2	0	2	0	3	3	0	0	4	0	3	7	10	2	2	2	0	2	0	3	7	1	2	0	0	0	0	2	2	1	0	2	3	0	2	0	2	6	3	1	0	3	10	18
MER117	42	41	13	37	31	11	17	26	20	26	30	47	33	55	55	39	56	54	50	82	59	87	60	63	15	34	26	25	38	33	22	30	20	27	19	13	47	37	21	38	40	79	48	49	45	63	29	58	63
MER119	420	353	206	381	426	152	376	399	279	475	439	746	817	419	426	265	509	319	350	459	326	502	373	762	327	384	234	320	365	348	231	271	222	162	337	209	431	260	213	239	354	412	313	428	510	408	420	421	10
MER121	12	25	2	5	21	3	6	14	17	16	13	7	26	7	30	14	31	28	18	23	14	6	12	23	24	25	14	13	17	12	5	28	12	14	35	23	8	8	13	24	3	27	8	21	7	25	36	41	18
MER123	0	0	0	0	1	2	0	0	0	4	3	1	0	1	0	0	1	0	0	0	0	0	1	2	1	1	0	1	0	1	0	0	0	1	1	1	1	0	0	0	1	0	1	0	1	0	0	0	0
MER124	11	14	10	7	9	5	6	10	19	10	8	12	33	12	16	23	8	9	10	23	11	16	23	6	13	11	7	11	8	23	9	10	4	1	16	0	13	5	10	5	12	23	15	21	9	10	27	35	11
MER125	0	0	0	0	0	1	0	0	0	0	0	0	2	0	0	0	0	6	0	0	0	4	0	0	0	2	0	0	0	3	0	0	0	0	0	0	5	0	0	0	0	0	0	0	3	0	0	4	6
MER126	24	28	14	20	27	9	14	20	21	12	19	44	48	15	22	18	18	9	10	15	12	11	13	34	17	12	8	19	9	16	15	17	18	9	12	6	5	6	2	4	7	10	21	22	10	12	14	9	0
MER127	13	7	3	1	3	6	1	3	2	1	1	3	5	0	5	0	2	6	1	1	0	3	5	2	1	4	4	4	3	1	2	8	1	0	0	0	5	2	1	2	1	5	1	2	0	1	2	3	0
MER129	0	0	0	0	0	1	0	0	0	0	1	1	0	0	0	1	1	0	0	4	1	0	4	0	0	0	0	0	0	0	0	0	1	0	0	0	0	0	0	0	1	0	0	0	0	4	2	1	0
MER130	7	1	5	2	1	2	0	3	2	7	2	2	11	6	9	13	9	7	11	1	4	4	2	5	1	1	0	0	0	0	3	3	2	0	0	2	3	4	0	3	4	0	2	2	1	0	2	3	13
MER131	23	36	11	20	22	7	18	26	21	18	21	21	23	28	30	18	18	25	34	22	9	16	11	24	28	36	30	13	22	13	12	14	12	12	15	13	12	4	7	15	13	19	22	9	17	22	16	14	48
MER133A	0	2	0	0	0	0	0	0	0	0	0	0	0	0	0	0	0	1	0	0	0	0	0	1	0	0	0	0	1	0	0	0	0	0	0	0	0	0	0	0	0	2	0	2	0	0	0	0	0
MER134	0	3	0	1	1	0	0	0	1	0	3	0	1	0	0	0	2	0	0	0	1	0	0	1	0	2	0	0	1	0	0	0	0	0	0	0	0	0	0	0	0	0	0	3	0	1	0	0	0
MER135	166	154	173	174	95	65	88	81	54	122	179	185	256	212	212	196	269	176	220	217	151	164	153	223	78	62	96	57	53	145	77	84	66	52	80	62	120	74	54	96	74	115	60	70	82	141	173	211	68
MER136	5	6	14	9	14	10	2	21	19	31	22	24	22	20	5	15	23	26	20	24	24	18	14	51	13	21	12	11	15	12	11	19	25	7	28	12	7	7	7	7	10	28	14	7	9	2	19	30	34
MER2	810	961	917	830	644	452	668	809	576	830	986	1071	2017	1052	1252	1063	1486	1384	1281	1144	828	920	703	1465	702	723	589	555	648	658	574	592	505	365	582	427	568	458	386	713	686	1096	825	840	822	943	898	966	546
MER20	711	1117	801	988	789	357	781	751	688	903	925	1132	1395	697	820	726	1118	893	881	979	770	839	715	1426	1016	1185	1034	819	1061	806	789	790	596	339	779	534	815	515	356	707	737	1290	821	851	892	1201	1066	1072	684
MER20B	38	41	44	38	32	21	34	38	26	38	53	39	97	40	75	68	55	73	65	67	27	25	11	48	40	21	27	17	21	35	30	26	21	14	25	18	20	21	14	31	24	49	33	47	40	35	19	29	25
MER21-int	0	0	0	1	0	0	0	0	0	0	0	0	0	0	0	1	1	2	0	0	0	0	0	0	0	0	0	0	0	0	0	0	0	0	0	0	0	0	0	0	0	0	1	0	0	0	0	1	0
MER21B	43	45	68	42	50	80	47	102	53	53	60	39	66	76	118	72	122	159	89	47	104	77	95	146	64	59	60	38	53	37	33	54	34	29	31	34	67	29	43	55	67	225	84	46	79	86	71	106	390
MER21C	569	645	676	572	752	422	514	552	544	869	820	1051	738	484	629	621	631	616	300	835	617	404	341	948	511	667	508	456	609	598	537	686	601	296	774	339	379	371	192	468	515	672	583	715	643	557	538	658	183
MER2B	7	10	8	13	16	12	12	6	11	10	16	17	16	11	13	6	24	19	12	10	8	13	6	21	26	20	12	9	11	9	6	10	10	7	9	5	10	4	5	13	14	31	15	9	13	11	18	21	7
MER3	88	109	95	61	87	44	50	59	64	72	102	106	146	65	101	95	133	124	121	115	89	75	78	171	91	58	85	47	75	84	81	83	41	56	84	47	61	40	37	66	81	110	88	89	88	94	119	122	110
MER31-int	0	0	4	0	0	8	0	0	2	7	0	1	0	4	0	5	14	5	4	0	0	0	8	3	3	0	3	1	3	1	0	3	4	1	1	1	7	0	2	0	2	8	0	0	1	0	0	3	0
MER31A	145	199	54	120	68	65	134	145	117	135	146	236	226	77	119	115	172	152	251	162	189	132	146	201	249	312	236	148	228	174	139	150	100	82	91	100	75	57	57	142	139	250	147	96	220	157	220	135	317
MER31B	127	97	167	63	65	39	54	70	55	105	84	170	246	170	253	178	215	199	225	121	64	132	68	217	32	48	18	27	35	43	44	48	35	17	39	26	36	17	18	36	42	41	41	23	66	60	65	91	152
MER33	617	793	585	644	559	315	534	521	473	691	694	905	1041	526	842	608	978	712	878	986	640	775	666	1108	595	745	686	524	705	653	558	613	447	308	512	402	571	373	280	503	525	984	629	651	671	750	828	882	322
MER34	12	28	21	40	27	15	11	39	29	13	15	36	22	8	11	16	18	28	10	19	20	35	10	13	35	23	34	13	16	27	29	6	21	8	15	3	21	6	7	14	7	32	8	10	15	34	10	30	31
MER34-int	0	0	1	0	0	4	0	0	0	0	0	0	0	0	0	0	3	3	1	1	1	0	0	0	1	1	0	0	0	0	0	0	0	0	1	0	0	0	0	0	0	0	1	2	0	0	4	0	0
MER34A	19	45	34	38	54	46	30	35	47	28	67	72	65	24	62	36	60	87	35	71	46	42	43	79	34	72	45	38	66	56	54	24	37	34	50	36	24	21	25	36	39	73	76	67	65	49	52	59	86
MER34A1	152	90	72	186	128	70	100	158	96	142	198	179	292	123	113	124	195	135	168	138	114	129	109	259	221	280	224	132	158	157	94	91	71	90	145	69	144	92	53	164	126	312	151	167	199	285	137	174	492
MER34B-int	918	1614	894	905	772	547	1025	1207	825	1423	1747	2048	1504	722	798	663	992	719	1431	1297	1167	974	753	1465	1018	1451	1145	614	1252	1437	945	1375	971	795	1855	1254	773	495	637	1208	712	1493	1156	1228	1160	1322	1804	1406	239
MER44A	47	48	23	33	25	20	40	29	38	51	50	78	72	31	62	52	81	84	51	77	42	32	79	113	72	47	35	43	83	82	34	44	58	21	36	29	26	28	30	44	58	77	55	60	45	67	60	59	72
MER44B	195	208	156	192	110	71	157	150	167	154	200	211	395	164	174	175	256	232	245	199	131	131	87	220	128	188	144	96	110	131	124	111	80	77	143	99	83	58	53	129	90	165	160	122	195	157	170	140	170
MER44C	174	221	231	196	132	171	148	313	161	211	258	377	276	179	235	252	203	194	198	210	234	276	143	356	142	164	184	153	121	173	156	130	126	109	117	73	156	71	76	183	150	214	205	132	171	226	182	137	87
MER44D	29	32	33	17	32	25	23	28	18	25	32	34	52	26	30	12	50	41	40	30	15	27	48	38	27	54	39	22	40	17	25	31	13	19	33	20	32	16	22	15	15	29	28	21	14	41	30	59	24
MER45A	0	0	3	2	1	3	2	1	0	0	3	1	1	4	2	1	8	15	0	1	5	1	4	3	1	2	6	1	1	2	1	2	0	3	0	0	0	1	1	2	2	3	3	3	2	2	1	8	35
MER45B	16	24	7	3	8	5	11	10	13	24	5	15	7	2	1	8	6	22	11	10	12	8	1	2	5	8	4	6	5	11	6	2	6	0	4	4	14	3	3	18	5	12	13	4	8	0	9	34	24
MER45C	0	4	0	0	1	5	3	1	4	3	2	1	4	0	18	3	6	10	9	4	2	3	9	2	4	3	5	0	2	0	1	6	3	4	4	0	4	3	4	2	1	4	10	4	1	3	2	3	0
MER45R	5	17	1	0	0	7	6	12	1	6	13	11	5	0	7	9	12	9	7	2	5	6	4	0	2	0	6	1	3	3	11	6	9	3	0	0	14	7	0	4	3	6	1	3	7	0	3	3	5
MER46C	44	71	71	40	40	38	47	34	21	67	76	83	139	97	78	109	149	103	138	142	73	68	76	136	65	41	73	35	61	71	37	41	36	35	41	13	73	23	44	53	93	127	90	79	75	61	90	83	66
MER47A	0	0	0	5	0	0	0	7	0	0	0	0	0	0	0	3	0	2	4	0	1	0	2	4	1	0	0	0	0	0	0	0	1	0	0	0	0	1	0	5	1	9	0	11	3	0	2	2	0
MER47B	5	7	11	7	12	5	9	13	3	11	8	20	10	5	20	5	13	14	7	18	3	7	11	7	2	23	6	9	13	3	8	5	9	0	8	2	4	3	1	3	5	12	4	12	11	2	11	17	9
MER49	10	2	13	3	0	1	5	4	2	3	5	2	21	7	0	5	10	5	2	5	3	0	0	1	3	10	2	1	1	0	3	1	2	0	1	5	0	0	0	0	2	0	2	0	1	0	5	1	0
MER4B-int	0	0	0	0	0	0	0	0	1	0	0	0	0	0	0	0	1	0	0	1	0	0	0	2	0	0	0	0	0	0	0	0	0	0	0	0	1	2	1	0	0	1	0	0	1	0	0	0	0
MER4CL34	0	0	0	0	0	0	0	0	0	0	0	0	0	0	0	0	0	0	0	0	0	0	0	0	0	0	0	0	0	0	0	0	1	0	0	0	0	0	0	0	0	0	0	0	0	0	0	0	0
MER50	164	208	206	210	102	77	104	179	140	210	209	270	277	132	255	135	218	241	161	175	175	145	93	280	156	159	130	104	112	142	109	150	100	97	161	111	97	51	86	143	154	182	119	87	110	149	167	118	95
MER50-int	0	0	0	0	0	0	0	0	1	0	0	0	0	0	0	0	1	0	0	0	0	0	0	0	0	0	0	0	1	0	0	0	0	0	1	0	0	0	0	0	0	0	0	1	0	0	0	1	0
MER50B	0	0	0	0	0	1	0	0	1	0	0	1	1	0	0	0	1	0	0	1	0	0	0	0	3	1	1	0	0	0	1	2	0	0	1	0	0	0	0	0	0	2	0	2	0	0	4	0	0
MER51-int	0	0	0	0	0	0	3	2	1	0	0	3	0	0	2	0	1	1	0	0	0	0	0	0	3	0	0	0	0	0	0	0	1	0	0	0	0	0	0	0	2	0	0	6	0	0	1	1	0
MER52-int	0	0	0	0	0	0	0	0	0	0	0	0	0	0	0	1	4	3	0	0	0	0	0	0	0	0	1	0	0	0	0	0	0	0	0	0	0	0	0	0	1	0	0	0	0	0	0	5	1
MER53	1491	1683	1363	1476	1017	655	1014	1080	992	1231	1648	2074	2393	1256	1695	1457	1987	1562	1829	1542	1295	1204	986	1966	1168	1178	1135	786	1146	1226	969	985	838	598	1007	798	842	660	542	888	995	1610	1054	964	1280	1210	1269	1172	341
MER54A	724	863	627	736	456	305	465	436	393	667	759	818	1412	670	1011	908	1028	797	1013	753	663	457	425	977	539	637	470	450	574	508	453	509	501	307	553	501	381	306	205	445	426	805	724	619	520	644	661	720	287
MER54B	50	34	9	36	42	22	25	52	18	53	45	34	42	27	46	18	39	48	45	30	32	21	22	37	42	27	43	46	64	36	28	29	19	18	23	20	21	24	18	21	25	31	28	18	37	32	38	18	28
MER57-int	2	2	4	0	1	3	0	3	4	1	1	0	1	0	3	1	12	5	2	1	0	2	2	2	0	0	0	2	0	0	0	0	1	2	1	1	0	1	0	0	0	1	3	3	2	2	0	3	1
MER57C2	8	6	6	8	15	10	19	9	15	18	20	33	10	1	4	8	15	22	11	14	16	29	15	28	21	22	10	21	19	23	4	15	23	7	25	15	32	21	10	17	20	22	15	19	17	14	28	56	7
MER57D	70	87	90	89	48	52	69	139	75	33	43	74	140	84	102	104	81	103	53	61	85	80	96	98	74	87	76	39	68	27	68	38	27	21	35	22	42	28	23	53	61	98	82	47	76	75	62	41	266
MER57E1	7	1	13	2	5	5	4	1	2	5	3	13	15	9	14	8	19	20	12	10	10	5	13	13	0	0	6	2	10	1	13	4	4	0	0	2	6	6	6	3	4	11	9	13	10	7	11	14	7
MER57E2	27	37	28	27	24	19	42	54	25	54	37	46	88	24	50	49	56	62	62	55	46	38	44	97	45	69	55	17	39	51	25	56	43	27	49	40	32	16	15	46	29	91	51	27	42	98	105	55	40
MER58A	592	673	614	604	504	283	426	422	322	568	660	800	911	482	742	612	716	557	648	668	395	428	427	826	526	509	422	343	545	559	459	426	357	252	448	326	433	299	225	378	351	493	466	482	470	516	471	547	296
MER58B	405	504	356	333	305	219	383	383	328	440	502	541	636	293	390	372	414	385	386	522	385	338	324	590	462	488	326	307	441	329	374	362	323	190	300	238	329	236	163	233	374	537	352	483	439	413	387	539	382
MER58C	157	166	158	188	177	77	99	112	63	146	184	325	252	163	269	230	294	239	294	303	163	199	171	240	123	113	71	93	130	150	132	130	127	64	129	80	132	109	56	115	98	158	97	151	103	118	110	158	277
MER58D	680	824	582	633	468	248	442	474	269	616	755	1048	1090	452	1006	723	790	704	590	771	498	619	403	813	579	517	355	640	742	704	708	701	492	358	550	395	551	380	324	511	527	823	618	941	446	646	593	586	2
MER5A	872	997	908	855	1002	746	966	1056	826	1148	1010	1353	1319	708	906	854	1015	898	805	1315	952	1053	765	1457	1294	1553	1362	1002	1436	944	875	1072	1055	633	1220	787	826	689	673	997	1024	1839	1133	1451	1111	1505	1294	1122	820
MER5A1	556	616	697	531	425	312	383	375	331	526	441	642	1097	660	981	835	925	1062	841	721	499	550	529	928	351	356	308	257	367	338	373	293	323	172	269	262	298	311	146	321	321	591	421	391	385	410	448	614	550
MER5B	518	451	567	376	399	319	331	385	344	453	507	601	1307	718	890	781	971	835	930	644	577	483	417	866	393	433	302	231	308	311	347	303	310	216	325	267	396	233	223	370	400	711	535	467	522	645	520	617	382
MER5C	5	5	2	5	6	4	5	8	2	15	9	12	17	11	4	7	14	13	3	11	3	10	5	7	11	15	8	12	11	11	5	6	7	1	6	4	8	10	9	8	12	20	15	11	4	11	5	17	19
MER5C1	0	0	2	0	0	0	5	0	4	2	1	0	0	0	0	0	0	1	0	0	0	5	2	1	3	0	0	0	4	0	0	0	0	0	4	0	0	0	0	0	2	1	0	1	0	0	1	0	0
MER63A	9	8	13	10	4	3	3	8	5	13	8	9	11	7	12	20	27	22	27	19	10	7	10	18	2	8	4	5	6	6	4	4	0	2	11	3	4	4	5	2	11	21	13	10	12	3	6	16	25
MER63B	41	32	30	24	48	25	34	42	18	42	36	49	40	27	34	35	59	29	41	56	32	28	17	60	32	30	30	28	32	34	47	40	47	11	36	27	46	13	21	18	51	60	53	68	47	34	35	47	25
MER63C	49	41	31	46	23	21	20	34	24	44	63	84	70	35	40	73	66	83	94	64	59	56	33	80	47	30	31	43	15	31	22	24	20	8	31	18	38	37	32	49	36	55	28	44	17	28	56	76	125
MER63D	17	54	29	11	29	16	17	17	13	35	24	33	52	20	32	19	29	36	36	46	24	23	21	26	28	29	29	22	21	16	27	10	31	12	33	15	23	14	11	14	39	24	24	19	27	28	59	25	49
MER65-int	1	1	0	0	0	0	0	2	3	3	0	0	1	2	1	0	2	3	3	1	3	3	9	2	0	1	0	0	3	2	1	2	1	0	0	0	1	0	0	0	2	0	1	0	1	1	1	5	3
MER65D	0	0	0	1	1	0	2	1	0	2	3	0	6	2	0	0	5	6	9	5	1	0	1	3	4	1	2	2	6	0	0	1	1	0	0	2	0	0	3	2	4	6	0	3	0	3	2	6	2
MER66-int	0	0	2	0	0	0	0	0	1	0	0	0	0	0	2	1	0	0	0	0	0	0	0	0	0	0	2	0	0	0	0	0	0	4	0	0	0	0	0	0	0	0	0	0	0	0	3	0	2
MER67A	7	1	4	0	1	1	0	0	0	0	0	0	0	0	3	0	1	6	0	4	1	0	0	0	0	0	1	0	0	0	0	0	0	0	1	1	0	0	0	0	0	0	0	1	1	0	0	7	2
MER67B	1	2	0	0	0	5	0	0	0	1	1	5	0	0	5	0	12	10	2	0	0	7	0	1	3	3	1	1	2	1	1	2	0	0	0	0	0	0	0	7	1	2	2	0	0	3	0	4	0
MER67C	282	390	314	306	191	103	161	195	130	292	355	393	465	254	317	264	389	281	245	260	125	163	128	241	176	286	181	194	306	242	223	232	180	106	201	130	114	104	70	136	115	169	143	168	145	177	171	212	189
MER67D	1	2	5	1	0	5	1	2	3	3	3	2	1	3	2	1	5	13	1	5	5	0	1	2	0	1	8	3	10	2	2	1	1	1	0	2	0	0	3	1	1	1	1	2	1	2	3	10	3
MER68	42	88	72	53	36	44	37	60	54	83	83	52	66	48	38	50	66	52	38	49	50	64	52	61	56	87	77	39	80	41	57	69	51	25	69	50	52	18	39	53	49	119	100	104	70	121	107	87	56
MER68-int	0	0	3	2	0	0	0	0	0	1	3	1	0	1	0	0	0	2	0	0	0	1	2	4	0	0	0	0	0	1	0	0	1	0	0	0	3	0	0	0	0	3	0	0	0	3	0	2	2
MER68B	35	50	16	59	27	20	37	22	18	32	28	19	41	9	14	25	28	28	12	27	36	21	18	61	41	29	26	58	44	34	20	25	28	15	23	9	22	27	17	29	36	62	37	54	66	47	23	49	21
MER68C	5	0	0	0	1	0	0	0	1	0	0	8	0	0	0	0	1	1	0	1	0	0	0	0	0	0	0	0	0	2	0	0	0	0	0	0	3	0	0	0	0	10	0	1	0	0	0	2	0
MER70-int	0	0	0	0	0	1	0	0	0	0	0	0	0	0	0	0	0	0	1	0	0	0	0	0	0	0	0	0	0	0	0	0	0	0	0	0	0	0	0	0	0	0	0	0	0	0	0	1	0
MER70A	6	32	17	13	9	4	14	26	29	35	37	12	49	13	21	8	23	24	6	36	18	11	3	17	9	35	11	9	23	7	11	27	12	13	19	24	1	4	10	16	4	24	18	25	12	27	31	22	28
MER70B	1	11	0	4	7	5	6	4	2	12	3	8	19	3	16	0	9	8	12	15	12	3	11	8	2	10	10	4	9	3	1	3	6	0	2	3	9	2	13	3	6	8	21	2	1	11	24	17	4
MER72	0	0	0	0	0	0	0	0	0	0	0	0	0	0	0	0	0	0	2	0	0	0	0	0	0	0	0	0	0	1	1	0	0	0	0	0	0	0	0	0	0	0	0	0	0	0	0	0	0
MER72B	0	0	0	1	0	0	0	0	0	0	0	0	0	0	0	0	0	0	0	0	0	0	0	1	0	0	0	0	0	0	0	0	0	0	0	0	0	1	0	0	0	0	0	2	0	1	0	2	0
MER73	20	25	40	30	20	12	24	34	26	34	29	49	36	18	28	20	48	27	19	28	32	28	18	37	18	16	17	13	23	12	31	21	10	7	14	6	23	9	10	23	11	21	17	11	15	31	24	20	13
MER74A	17	10	24	14	11	34	7	6	8	12	17	27	20	8	5	23	38	27	18	10	14	16	15	10	10	6	9	7	6	3	17	9	11	2	6	7	14	2	6	10	8	4	14	9	6	5	24	31	27
MER74B	7	13	3	2	1	12	4	4	1	5	6	17	2	3	0	5	15	14	15	6	1	10	2	7	7	2	10	5	2	1	1	2	1	1	11	9	4	9	1	5	3	23	8	13	3	4	4	20	6
MER74C	4	3	0	0	2	0	2	0	2	0	0	2	2	0	0	1	1	3	1	1	4	0	0	0	2	3	3	2	1	0	9	0	2	0	1	0	2	1	0	0	2	2	1	3	1	0	0	3	0
MER76	23	50	36	32	39	18	23	32	20	30	31	46	51	30	51	45	31	43	32	74	47	32	36	54	13	27	29	31	25	37	24	22	23	14	20	15	39	21	16	28	27	57	52	42	39	53	21	40	24
MER76-int	0	0	1	0	0	1	0	0	0	1	0	0	0	0	0	0	0	0	1	0	0	0	1	1	0	0	0	0	0	0	0	0	0	0	0	0	0	0	0	0	0	0	0	0	0	0	0	0	0
MER77	33	57	32	33	28	20	25	35	26	23	43	36	33	20	14	14	18	29	24	6	9	5	32	12	51	38	31	45	67	20	34	14	18	17	37	13	22	12	4	8	20	66	11	12	10	9	17	25	39
MER77B	2	0	4	1	2	6	0	4	3	3	0	0	6	4	4	4	10	15	0	11	3	4	0	1	0	4	2	1	5	6	3	0	2	0	4	0	4	3	0	4	6	2	1	6	2	5	5	16	23
MER81	6	14	2	5	8	4	3	5	5	4	8	5	6	7	6	9	12	15	16	16	16	8	1	10	6	4	4	3	2	10	1	1	3	1	4	2	4	6	2	5	6	15	9	8	5	15	9	20	14
MER87	0	0	0	0	0	0	0	0	0	0	1	1	0	0	1	2	1	4	0	1	3	0	0	1	0	5	4	0	1	1	1	0	1	0	1	1	1	0	0	0	0	0	0	0	0	0	2	1	3
MER88	0	1	0	0	0	0	0	0	0	0	2	0	0	0	0	0	2	4	0	1	0	0	0	1	0	0	0	0	0	0	0	0	0	0	0	0	0	0	1	1	0	6	4	3	0	2	2	8	0
MER89	8	13	7	19	3	9	9	9	2	3	16	13	7	4	11	19	14	22	14	16	5	11	15	13	18	20	7	6	7	8	2	4	5	2	7	7	12	2	10	3	11	17	7	26	4	8	5	21	7914
MER89-int	0	0	0	0	0	1	1	1	0	0	0	2	0	0	1	0	3	2	0	0	0	0	0	0	0	1	0	0	0	0	0	8	0	0	2	0	0	0	0	0	0	0	0	0	0	0	0	3	0
MER90	3	2	0	0	4	7	3	8	4	5	1	0	4	1	3	12	6	7	14	4	6	2	0	12	2	0	2	4	1	1	10	2	1	3	11	0	1	1	3	1	2	0	2	9	8	7	3	5	0
MER90a	126	127	47	70	94	47	104	113	76	91	136	139	132	62	123	89	115	99	120	176	103	102	84	237	186	114	86	126	162	134	95	146	92	44	84	70	134	114	39	88	182	213	119	233	138	102	117	124	107
MER91A	1049	1084	1009	999	1060	790	943	1322	824	1165	1322	2319	1453	596	1186	913	1132	871	877	1032	1136	1050	992	1785	710	820	733	650	971	891	801	632	556	379	518	478	748	467	382	734	578	1046	714	719	1038	968	1041	1000	162
MER91B	91	112	169	106	156	68	79	100	62	125	139	145	224	95	210	182	157	202	133	125	172	90	64	187	63	98	85	48	65	74	100	120	123	49	126	83	65	37	50	80	82	119	111	107	101	137	213	135	81
MER91C	0	1	0	0	1	1	0	0	0	0	0	0	0	0	0	0	0	1	0	0	1	0	0	0	0	0	0	0	0	0	0	0	0	0	0	0	0	0	0	0	0	0	1	0	0	0	0	1	0
MER92-int	0	0	0	0	0	2	0	0	1	0	0	2	2	8	4	3	2	9	3	1	1	0	0	4	2	1	3	2	1	0	4	2	0	0	1	2	1	0	0	0	0	3	1	0	4	0	2	9	0
MER92A	0	0	0	0	0	1	0	0	0	0	0	0	0	0	0	0	0	0	0	0	0	0	0	0	0	0	0	0	0	0	0	0	0	0	0	0	0	0	0	0	0	0	0	0	0	0	3	1	0
MER92B	8	22	6	6	9	11	5	0	5	4	1	8	8	0	0	4	8	8	0	7	6	5	3	3	10	13	1	7	6	10	4	3	0	6	8	0	1	0	3	5	2	10	8	6	3	9	1	20	17
MER92C	0	0	0	0	0	0	0	0	0	0	0	0	0	0	0	0	1	1	0	0	0	1	0	1	0	0	0	3	0	0	0	0	0	0	0	0	0	0	0	1	0	0	0	0	0	0	0	4	0
MER92D	0	0	0	0	0	0	0	0	0	0	0	0	0	0	0	0	1	5	0	2	0	0	0	0	0	0	1	1	0	0	0	0	2	0	0	0	0	0	0	0	0	0	0	0	0	0	0	4	5
MER94	9	16	5	5	1	6	4	8	6	9	9	2	9	17	14	6	15	14	0	7	8	7	2	6	6	8	6	0	7	11	19	8	5	5	14	8	4	0	2	0	9	17	4	12	15	10	27	17	197
MER94B	0	0	0	0	0	0	0	0	0	0	1	0	0	0	0	0	0	0	0	0	0	0	0	1	0	0	0	0	0	0	0	0	0	0	0	0	0	0	0	0	0	0	2	0	0	0	0	0	0
MER95	0	0	0	0	0	0	0	0	0	0	0	0	0	0	0	0	1	1	0	0	0	0	0	0	0	0	0	0	0	0	0	0	0	0	0	0	0	0	0	0	0	0	0	0	0	0	0	0	0
MER96	7	6	7	1	1	1	1	0	3	3	9	1	16	4	12	12	8	4	7	7	4	6	8	3	1	14	4	1	2	1	0	0	0	0	1	0	0	2	0	4	10	5	13	3	4	5	7	3	5
MER96B	60	101	88	44	76	71	81	98	52	70	110	89	81	36	72	86	79	90	83	134	84	98	43	118	89	115	69	73	108	67	50	86	59	49	107	60	62	45	46	107	108	114	96	88	72	100	89	89	51
MER97a	0	1	9	0	9	4	0	6	3	2	17	0	0	9	10	2	14	5	15	19	11	20	17	8	1	1	22	3	1	6	0	14	5	4	10	12	12	6	8	13	9	14	29	10	6	5	0	25	54
MER97b	18	9	24	18	19	9	14	17	12	15	16	17	15	9	15	9	21	18	25	31	15	22	4	38	7	11	11	14	15	35	20	18	14	4	9	9	7	7	9	7	8	17	18	20	12	15	22	25	5
MER97c	0	1	0	0	0	0	0	0	3	1	1	0	0	0	1	0	0	1	4	1	0	3	0	1	0	0	1	1	1	1	0	0	1	0	0	1	0	0	0	1	4	2	1	0	1	1	10	1	1
MER97d	3	0	0	0	0	0	0	0	2	0	1	4	3	0	0	0	0	0	0	0	0	0	0	2	1	2	1	0	0	0	1	2	0	0	1	0	0	0	0	0	0	0	0	4	0	0	0	2	0
MER99	30	42	50	54	29	17	21	25	25	20	39	44	54	10	28	29	37	34	44	28	14	33	18	43	23	29	19	9	19	18	38	26	7	7	28	18	10	4	2	19	10	57	10	12	33	16	31	20	17
MERV1_I-int	0	21	1	7	14	38	6	11	5	11	8	28	8	8	12	11	72	95	36	31	16	12	17	16	12	25	5	3	24	16	12	12	8	7	14	8	17	7	13	22	18	63	19	26	6	12	36	35	226
MERV1_LTR	6	12	5	4	7	17	7	8	10	5	11	24	10	2	4	6	17	19	13	16	10	8	3	18	4	14	8	5	10	6	6	10	8	4	12	6	7	3	7	21	17	20	12	17	30	33	30	19	50
MERVK26-int	106	178	58	133	120	116	80	160	89	81	130	191	195	104	76	102	131	128	90	128	129	78	77	191	133	147	116	103	103	133	134	86	79	52	99	44	114	59	62	153	149	170	150	208	139	135	153	153	97
MERVL-int	143	177	227	162	165	152	138	152	165	209	205	287	167	103	153	187	533	574	200	247	237	177	130	322	209	221	207	163	205	161	169	188	215	58	236	167	156	119	81	123	196	253	195	164	186	168	170	394	91059
MERVL_2A-int	177	331	283	375	265	199	207	262	194	303	410	533	463	271	421	492	623	528	613	491	402	538	325	767	286	304	252	217	257	308	293	212	258	186	301	140	397	240	131	285	449	524	266	413	464	373	392	604	2636
MERX	0	0	1	0	0	0	0	0	0	0	0	0	0	0	0	0	0	1	0	0	0	0	1	0	0	1	0	0	0	0	0	0	0	0	0	0	0	0	0	0	0	0	0	0	0	0	0	2	5
MIR	3721	4961	4005	4163	3721	2384	2792	3622	2675	3908	4680	6335	6551	3604	5045	4862	6428	5041	5375	5267	3907	3982	3041	6466	3705	3951	3374	2758	3335	3720	3147	3477	3164	2063	3648	2314	2987	2048	1828	3134	3294	5528	4234	3846	3881	4113	3896	4330	2897
MIR3	2792	3297	2443	2716	2722	1659	2286	2610	1997	2772	3241	3432	4107	2177	3093	2813	3643	3317	2882	3846	2765	2628	2212	4440	2760	3190	2511	2417	2935	2616	2642	2302	2369	1372	2530	1770	2104	1765	1189	2176	2529	4049	2780	2954	2665	3126	2790	3050	1792
MIRb	3350	4079	3375	3502	3103	2175	2625	3376	2556	3325	4218	4839	5550	2975	4324	3523	5037	4660	4466	4587	3572	3259	2888	5566	3418	3863	3249	2546	3478	3518	2958	3115	2762	1770	3072	2350	2999	1936	1604	2791	3005	4894	3400	3597	3634	3969	3767	4617	3050
MIRc	3505	4126	3404	3689	3330	2039	2797	3419	2698	3779	4233	5348	6224	3317	4551	3973	5155	4636	4840	4709	3973	4001	3205	6336	3357	3675	2957	2359	3465	3394	3136	2973	2802	1538	2910	2083	3210	2228	1656	2788	3135	4749	3417	3516	3818	3964	4137	4489	2444
MLT-int	260	236	134	241	242	151	162	135	120	174	156	262	233	220	294	201	280	282	189	356	256	207	296	612	213	185	134	186	250	154	272	136	139	84	102	132	242	206	90	174	202	303	199	319	225	281	217	384	62
MLT1-int	1	20	21	37	22	20	18	22	27	14	9	26	13	29	33	32	13	32	18	46	63	24	37	51	25	26	19	3	18	15	6	28	21	22	26	18	22	5	13	41	26	34	34	39	30	32	36	32	26
MLT1A	129	156	143	122	108	104	122	161	92	155	167	212	214	86	97	114	225	215	161	202	197	168	88	198	175	172	219	107	135	162	115	135	102	66	156	103	131	82	86	109	170	329	182	176	178	195	220	238	275
MLT1A-int	3	0	0	0	0	1	0	0	1	0	0	0	0	0	1	0	2	4	0	0	0	2	0	0	0	0	0	0	2	0	0	3	3	0	6	0	0	0	3	4	0	1	1	3	1	0	1	4	0
MLT1A0	458	708	554	539	526	394	515	613	602	596	626	758	798	448	701	575	803	689	663	739	673	472	415	990	677	1071	703	421	621	566	406	606	613	341	697	592	443	274	331	691	686	967	820	753	621	768	1134	857	546
MLT1A0-int	0	1	0	0	1	8	0	0	0	1	2	3	6	3	0	1	6	7	0	0	0	0	0	0	0	5	4	0	0	0	0	0	0	0	3	0	0	0	0	0	3	0	0	1	0	0	0	5	0
MLT1A1	340	415	345	299	310	210	301	330	268	385	353	500	672	298	400	382	559	463	430	480	350	337	284	603	357	429	362	208	294	271	250	325	197	194	240	213	245	196	154	266	335	546	363	439	329	351	497	552	510
MLT1A1-int	0	0	0	0	1	6	0	1	0	0	0	1	0	2	0	0	2	2	4	3	6	0	1	0	0	0	0	0	2	0	1	0	0	0	0	0	1	4	1	0	0	0	0	0	0	0	1	3	0
MLT1B	409	415	430	384	400	317	323	444	374	457	504	636	653	356	529	389	630	596	465	531	424	475	318	696	418	532	449	367	466	430	341	380	367	256	364	340	299	224	203	396	426	598	404	436	504	658	512	561	486
MLT1B-int	1	3	8	0	5	1	0	0	2	4	7	7	3	5	9	3	6	13	16	2	2	4	3	0	0	3	0	2	1	4	1	2	5	1	5	2	1	2	0	2	1	5	2	0	8	5	0	8	0
MLT1C	301	359	192	278	246	214	290	358	273	284	372	320	502	158	168	187	418	386	311	324	290	251	287	380	555	598	524	324	389	304	320	309	205	186	328	170	250	215	154	336	503	619	406	422	465	404	400	447	514
MLT1C-int	0	0	3	0	5	3	0	0	0	0	1	1	0	7	18	7	14	6	12	2	2	7	4	8	0	0	0	0	0	2	0	0	0	0	0	0	0	0	1	0	1	1	0	0	0	2	0	6	0
MLT1D	390	571	336	513	439	326	419	490	439	462	588	662	642	349	426	366	605	717	480	601	506	505	343	931	771	824	625	452	608	458	571	498	466	284	500	334	522	364	230	462	712	991	652	709	639	646	627	760	821
MLT1D-int	28	16	14	15	38	11	9	6	30	18	20	14	44	19	9	4	47	17	1	23	35	19	8	11	14	8	12	4	7	5	17	15	22	7	29	10	6	5	8	11	14	14	17	21	28	14	18	24	0
MLT1E	20	30	25	25	23	21	16	24	19	13	32	54	30	25	65	32	33	64	72	78	62	42	28	59	16	46	26	17	19	17	17	13	22	6	15	15	29	15	16	16	30	32	17	32	39	28	22	60	79
MLT1E1	203	210	205	205	154	125	193	243	161	209	296	351	322	197	165	213	179	189	168	220	187	177	114	324	180	168	156	128	142	178	146	129	138	87	126	70	139	71	69	162	177	205	175	145	157	215	187	130	81
MLT1E1-int	0	0	2	0	1	0	0	0	0	0	0	2	0	0	1	0	0	1	4	3	0	0	0	0	0	0	0	0	0	0	0	0	0	0	0	3	1	0	2	0	0	0	4	0	0	5	2	0	0
MLT1E1A	20	102	48	35	43	46	35	73	46	45	42	46	49	27	52	54	65	75	66	52	68	45	33	94	35	84	50	31	45	35	19	27	29	32	56	36	24	27	26	39	20	74	72	69	79	76	86	50	65
MLT1E1A-int	0	0	1	0	0	1	0	3	0	4	0	0	0	4	3	0	0	2	0	5	0	0	0	0	0	0	0	0	0	0	0	0	0	0	0	0	0	0	0	3	0	0	4	0	0	0	1	0	0
MLT1E2	76	108	141	75	84	86	62	104	86	133	165	217	172	102	114	94	175	131	86	122	99	93	56	209	100	136	85	58	80	92	65	85	66	62	147	70	57	45	45	63	88	140	92	110	85	106	107	109	72
MLT1E2-int	0	0	0	0	0	0	0	0	0	0	0	0	0	0	0	0	2	0	0	0	0	0	0	0	0	0	0	0	0	0	0	0	0	0	0	0	0	0	0	0	1	0	0	0	0	0	0	0	0
MLT1E3	97	85	50	78	54	34	57	55	60	104	93	101	129	47	91	56	90	69	85	70	37	77	71	83	68	75	55	67	70	54	52	57	48	27	44	44	40	31	21	28	56	117	32	54	62	120	84	111	53
MLT1E3-int	0	0	0	0	0	0	0	0	0	0	0	0	0	0	0	0	0	0	0	0	0	0	0	0	0	0	0	0	0	0	0	0	0	0	0	0	0	0	0	0	0	0	0	0	0	0	0	0	1
MLT1F	225	148	197	252	131	85	124	130	97	115	163	208	381	224	221	260	317	254	281	289	225	289	239	286	100	143	95	76	93	127	102	85	55	48	75	50	127	94	70	124	152	299	197	105	244	191	198	237	238
MLT1F-int	2	4	1	0	6	6	2	3	0	0	2	1	6	0	0	6	4	7	0	3	2	0	4	6	3	8	1	1	2	1	0	2	1	0	0	0	2	0	0	5	0	5	4	5	3	1	2	5	5
MLT1F1	126	108	84	137	130	63	92	86	53	108	176	209	171	117	189	137	155	171	188	181	96	111	127	215	85	91	95	77	70	109	98	79	77	38	80	58	81	63	67	110	93	109	70	98	107	103	118	155	24
MLT1F1-int	0	0	0	2	0	1	0	0	0	0	0	0	0	0	0	0	8	1	0	0	0	0	0	0	0	0	0	0	0	1	0	0	0	0	0	0	0	0	0	0	0	0	0	0	0	0	0	0	0
MLT1F2	256	341	222	304	206	100	179	226	198	225	261	300	398	223	229	255	305	294	378	328	284	305	176	372	306	382	204	197	257	248	242	246	206	131	296	150	253	157	138	185	201	271	252	259	295	322	338	383	189
MLT1F2-int	6	7	20	6	13	5	6	6	15	12	7	8	7	5	5	9	13	11	11	8	6	5	5	9	4	19	12	2	11	6	1	22	5	3	17	15	4	5	6	4	4	6	5	7	6	3	33	6	4
MLT1G	19	20	37	32	38	35	31	44	13	34	55	37	39	38	59	47	73	61	43	48	65	14	29	47	23	43	39	14	16	38	19	27	10	13	41	25	13	11	17	19	28	51	29	33	49	46	63	70	55
MLT1G-int	0	0	0	0	1	0	1	0	0	0	0	1	1	1	2	0	1	0	0	0	0	1	0	0	0	2	0	0	0	0	0	0	0	0	1	0	1	0	0	0	0	0	0	0	1	0	0	1	1
MLT1G1	18	35	21	24	17	20	21	23	19	39	35	25	69	35	28	61	89	52	34	28	44	20	21	37	36	28	28	9	35	16	12	22	23	9	20	13	32	21	9	36	17	61	30	49	28	41	30	73	72
MLT1G1-int	4	0	0	0	0	4	1	0	4	0	0	0	0	3	15	3	14	0	2	6	1	0	4	9	19	1	13	0	6	0	0	5	1	0	0	0	9	7	7	4	8	0	6	11	3	8	0	16	0
MLT1G3	67	117	100	90	51	42	80	83	51	74	49	63	165	124	143	106	146	171	93	82	76	105	86	178	56	81	68	37	51	28	38	42	38	36	50	32	85	30	25	69	48	73	65	64	80	117	77	80	97
MLT1G3-int	39	34	26	31	23	12	31	40	8	21	20	37	96	27	56	23	78	52	66	34	20	47	19	58	37	31	22	13	14	5	19	27	27	7	22	16	22	6	14	28	17	21	11	10	48	34	27	29	28
MLT1H	42	49	51	36	37	29	34	27	30	39	49	46	94	26	140	56	144	122	62	65	61	39	46	80	27	39	25	34	35	39	25	28	17	16	38	28	22	26	24	42	40	106	52	43	35	71	81	120	78
MLT1H-int	605	717	426	637	534	254	413	289	219	546	690	949	830	377	612	624	741	687	516	675	320	480	454	804	341	216	202	345	415	331	469	257	314	129	239	187	273	316	98	232	334	407	293	392	295	334	294	439	128
MLT1H1	29	45	61	40	63	43	52	38	47	107	101	121	63	45	40	53	104	73	57	104	67	84	80	126	90	134	45	56	47	96	37	57	115	45	81	78	72	53	30	61	115	139	112	144	54	99	118	193	35
MLT1H1-int	2	5	2	8	0	1	10	3	4	8	5	4	0	4	7	12	0	0	1	7	1	2	7	17	5	6	0	1	9	8	5	0	6	0	4	9	8	1	0	7	1	12	4	6	1	10	1	1	0
MLT1H2	23	22	14	13	18	15	18	19	11	9	20	34	30	10	28	20	40	46	24	33	29	19	21	35	25	19	19	17	19	17	31	19	11	16	19	14	31	9	16	18	20	58	22	20	17	26	17	31	68
MLT1H2-int	0	0	0	0	0	0	0	0	0	0	5	0	0	0	0	0	1	4	0	0	0	0	0	0	0	0	0	0	0	0	0	0	0	0	0	0	0	1	0	0	0	0	0	0	0	0	0	3	0
MLT1I	67	57	59	59	44	38	47	57	59	61	51	77	80	40	70	56	104	87	48	59	51	45	45	97	60	65	59	34	39	41	42	41	37	30	36	28	50	29	32	49	62	46	51	60	59	50	58	76	112
MLT1I-int	0	0	0	0	0	0	0	0	0	0	0	0	0	1	0	0	1	3	0	0	0	0	0	0	0	0	0	0	0	1	0	0	0	0	0	0	0	0	0	0	0	0	0	1	0	0	0	1	0
MLT1J	698	844	724	755	633	401	616	658	548	813	937	1134	1170	613	916	812	948	897	893	942	878	723	676	1133	907	1045	875	586	855	708	671	753	701	391	743	557	628	451	384	657	655	1246	782	955	695	854	944	1028	1006
MLT1J-int	23	38	30	31	12	24	19	27	16	54	18	14	42	10	20	25	26	30	47	18	85	28	24	51	21	77	43	26	27	8	2	30	32	10	34	10	34	20	24	41	13	66	58	56	49	53	84	88	46
MLT1J1	89	152	137	127	194	91	162	143	90	170	225	269	205	124	140	161	221	134	122	157	109	148	111	122	200	169	81	144	132	171	141	127	179	68	139	86	92	79	55	133	213	147	164	161	155	116	139	137	132
MLT1J1-int	16	18	0	5	2	2	2	6	3	9	2	0	7	1	20	1	5	10	8	3	6	8	4	5	7	12	21	5	7	2	8	3	2	14	1	3	6	2	4	5	15	23	4	2	16	17	10	1	33
MLT1J2	20	34	38	57	45	39	21	31	48	38	50	49	59	39	82	71	68	86	47	100	106	59	67	69	33	34	34	17	30	30	29	28	29	34	26	23	38	21	18	43	71	81	75	40	53	44	83	110	170
MLT1J2-int	0	0	0	0	0	1	0	0	0	0	0	0	0	0	0	0	0	1	0	0	0	6	0	0	0	0	0	0	0	1	0	0	0	0	0	0	0	0	0	0	0	0	0	0	0	0	0	0	0
MLT1K	192	319	209	262	226	120	182	219	201	298	294	287	385	181	226	176	391	263	266	230	249	233	247	452	224	294	252	175	325	231	201	253	179	129	237	210	224	121	124	219	366	528	397	301	345	266	399	341	475
MLT1K-int	0	0	0	0	0	0	0	0	0	0	0	0	0	0	0	0	0	0	0	0	0	0	0	0	0	0	0	0	0	0	0	0	0	0	0	0	0	0	0	0	0	0	0	0	0	0	2	0	0
MLT1L	522	794	411	694	659	411	492	635	447	585	654	1221	818	586	726	596	660	786	679	644	616	607	511	1164	864	730	684	510	543	509	512	670	655	405	523	376	713	488	251	517	583	839	750	886	795	958	734	842	319
MLT1L-int	0	0	0	0	0	0	0	0	0	0	0	0	0	0	0	0	0	0	0	0	0	0	0	0	0	0	0	0	0	0	0	0	0	0	0	0	0	0	0	0	0	0	0	0	0	0	0	0	0
MLT1M	62	102	32	45	41	55	54	71	35	65	52	68	81	42	88	52	61	82	77	61	97	82	67	93	63	57	68	42	42	39	41	57	29	33	33	35	71	23	31	45	56	105	39	46	51	67	42	68	103
MLT1N2	20	23	7	15	7	11	28	14	12	9	26	13	41	3	17	8	12	23	9	11	5	7	8	22	13	18	12	15	18	26	28	10	16	11	24	7	7	13	1	15	15	24	14	13	9	20	16	10	10
MLT1N2-int	0	0	0	0	0	0	0	0	0	0	0	0	0	0	0	0	0	0	0	0	0	0	0	0	0	0	0	0	0	0	0	0	0	0	0	0	0	0	0	0	0	0	0	0	0	0	0	0	22
MLT1O	4	1	1	0	3	5	3	2	2	3	5	2	9	1	2	0	15	13	6	4	1	0	3	12	2	15	1	3	2	6	3	4	4	7	10	0	3	0	3	0	7	11	7	0	1	4	15	20	9
MLT2B1	27	25	36	3	6	12	20	11	18	15	21	18	34	13	22	28	50	46	16	37	17	12	30	39	11	10	6	16	11	31	6	17	12	13	18	12	13	21	23	15	43	30	14	34	34	25	30	47	48
MLT2B2	134	91	64	113	150	75	175	169	169	158	176	153	291	99	120	88	151	125	131	192	156	241	144	258	420	446	379	163	323	149	101	165	140	106	155	120	201	97	115	164	279	564	179	322	314	245	164	263	713
MLT2B3	21	19	7	19	19	31	10	14	14	28	28	14	21	12	32	43	85	45	60	40	46	18	26	46	15	25	8	7	11	32	39	20	31	21	47	17	7	6	9	11	26	61	23	28	8	11	40	73	48
MLT2B4	80	112	115	71	58	57	65	90	72	72	49	118	110	99	102	88	126	146	115	83	149	93	94	135	96	82	73	44	56	65	53	55	44	41	64	36	60	50	30	117	91	167	103	99	110	136	142	140	125
MLT2B5	143	34	51	40	43	47	39	51	29	67	83	84	138	93	203	142	149	99	178	87	70	88	82	121	43	49	42	28	29	48	59	51	45	39	34	44	38	31	14	27	35	73	45	42	41	54	46	74	14
MLT2C1	11	6	7	0	9	7	2	3	13	9	0	2	5	6	7	10	28	17	7	21	16	11	8	5	7	12	6	2	8	12	6	1	6	5	0	5	14	7	5	7	15	14	17	4	7	9	14	14	12
MLT2C2	7	2	2	15	4	8	14	7	13	18	15	21	16	3	5	13	8	12	2	5	11	5	2	11	13	2	3	3	2	3	3	10	6	8	19	5	0	4	2	10	2	19	14	19	6	5	20	13	0
MLT2D	28	40	50	47	20	30	16	25	28	43	53	42	68	25	40	28	62	68	69	46	40	26	25	59	42	66	35	27	44	41	35	23	24	31	49	25	22	24	14	45	53	67	67	55	56	49	89	64	29
MLT2E	2	4	0	0	0	1	1	0	0	0	0	0	2	4	4	0	3	3	0	10	15	0	8	0	0	0	0	1	3	2	2	1	2	0	3	0	4	6	2	0	0	3	5	1	1	9	0	8	8
MLT2F	92	229	226	133	146	193	254	154	141	146	141	157	162	116	163	343	329	332	578	303	355	221	234	335	284	488	348	138	275	116	113	143	94	78	160	142	157	125	104	312	599	1253	798	461	645	319	373	213	511
MLTR11A	17560	19322	10121	15523	12526	6629	13126	13169	9971	13783	14940	19443	21020	10824	12491	11805	15565	10529	12131	12183	8867	11845	10325	20361	20916	21424	18964	13841	23308	16277	16026	13515	9896	6662	11469	8594	13437	8067	5718	9808	11625	19457	13392	14507	16290	13235	15344	15109	9892
MLTR11B	8461	10186	6662	10027	8350	3758	6873	8039	5676	7538	10930	12219	13430	7054	10843	7693	11639	8002	10280	11353	7066	8238	7069	13984	9660	11184	8587	9129	12797	11721	9980	9744	7893	4648	9562	6824	8041	5644	4060	7940	7208	11337	9971	10457	8868	10938	10820	10708	4061
MLTR12	4	25	2	12	21	18	14	27	15	7	16	14	53	46	112	15	74	97	54	60	54	57	107	73	30	32	28	13	22	6	0	14	9	6	13	36	70	44	46	14	58	36	8	22	34	34	71	227	75
MLTR13	0	13	0	0	11	3	5	1	1	9	10	0	11	2	0	1	4	10	14	15	6	3	5	14	4	1	5	0	0	6	0	0	9	13	0	9	2	12	2	1	11	9	6	6	6	4	4	30	20
MLTR14	1117	1243	845	1204	733	598	862	866	728	834	1081	1231	1547	778	1074	1073	1431	1059	1105	965	716	858	670	1474	951	1142	882	675	943	770	658	645	605	372	577	434	595	514	322	617	513	1085	765	824	682	877	819	885	624
MLTR18A_MM	0	4	2	8	11	14	12	12	5	6	7	20	10	2	2	0	15	22	5	6	12	8	8	5	11	28	12	5	4	12	25	3	13	16	21	4	0	5	0	0	10	7	15	2	5	5	6	17	26
MLTR18B_MM	220	297	507	256	286	201	239	366	281	470	287	356	411	387	732	453	501	624	882	597	436	383	212	704	295	432	326	158	249	292	196	306	272	146	375	232	293	119	141	434	337	622	515	340	406	406	634	516	719
MLTR18C_MM	34	8	32	16	4	20	6	27	11	21	23	40	16	6	28	6	43	51	24	25	16	16	12	25	19	3	9	19	8	16	18	25	13	1	24	1	5	8	5	6	14	34	18	15	32	3	56	30	6
MLTR18D_MM	4	1	3	4	1	4	1	1	1	7	5	4	10	1	0	6	34	33	6	4	10	0	9	2	5	7	1	0	4	0	0	5	0	0	16	2	5	1	6	2	25	11	10	1	1	7	1	22	6
MLTR18_MM	1	19	12	11	7	7	7	11	22	7	7	12	5	14	22	20	26	21	18	11	12	13	9	9	22	24	29	9	10	7	3	6	5	3	4	13	3	4	11	13	15	9	16	17	11	15	12	35	29
MLTR25A	22	42	26	31	23	336	18	35	25	32	27	42	51	24	50	44	211	158	59	41	21	44	41	55	34	44	33	23	45	39	8	42	14	25	40	16	19	13	12	25	23	47	29	39	29	24	61	327	85
MLTR25C	0	9	0	3	2	2	3	9	6	5	1	3	7	0	7	10	13	23	2	9	13	1	3	8	3	9	9	3	9	3	4	5	7	7	13	6	4	1	1	11	1	10	5	5	12	2	6	12	35
MLTR31A_MM	0	5	7	1	0	8	2	3	1	3	2	5	5	1	0	0	10	14	3	3	12	0	5	10	3	8	5	4	3	8	7	1	1	4	4	3	4	0	3	3	16	12	3	1	6	2	15	24	8
MLTR31C_MM	0	4	8	0	4	6	0	7	4	4	4	5	2	0	5	1	12	15	7	5	5	1	1	8	10	12	10	0	6	4	1	0	6	5	6	0	7	5	1	1	3	3	1	19	4	5	4	2	28
MLTR31D_MM	0	3	6	1	1	4	8	1	8	11	6	6	2	2	5	4	19	18	3	2	9	3	2	5	7	6	8	2	6	2	0	4	9	6	3	4	1	5	0	4	6	0	0	2	4	4	3	10	65
MLTR31E_MM	0	1	0	2	0	0	2	0	0	4	2	0	1	1	1	9	4	4	8	3	5	1	0	2	8	3	4	1	0	1	0	3	4	1	2	0	4	2	1	4	8	6	2	2	1	3	2	3	7
MLTR31FA_MM	9	5	20	8	8	13	11	1	7	7	13	9	49	0	11	12	19	24	5	10	21	15	4	22	12	16	20	2	8	6	14	22	0	4	36	2	6	6	8	9	18	18	7	16	16	14	21	16	13
MLTR31F_MM	42	43	21	23	13	23	32	28	23	32	48	39	45	13	30	26	39	26	25	44	38	25	25	52	34	44	48	28	50	39	23	32	26	17	31	22	22	20	19	23	27	63	51	36	27	24	35	40	96
MLTR32C_MM	0	0	0	1	2	8	1	1	2	3	0	0	0	1	0	0	6	10	0	0	1	0	0	1	1	0	3	2	1	3	4	1	4	0	1	0	1	0	0	0	1	2	3	3	1	0	0	9	0
MLTR73	44	33	25	36	43	26	28	17	21	15	35	36	70	48	45	28	57	55	23	33	23	31	18	24	15	11	29	28	17	34	29	31	8	11	19	11	23	18	8	25	40	41	47	22	32	36	40	57	28
MMAR1	18	25	32	58	41	37	35	17	41	35	67	56	118	8	29	23	49	70	56	73	54	34	18	64	13	46	41	42	36	70	55	34	50	14	64	14	26	14	24	72	60	35	29	70	40	41	48	36	75
MMERGLN-int	240	360	282	207	236	116	168	322	215	382	225	181	268	110	215	138	257	300	505	305	268	320	163	448	369	654	274	191	275	251	189	268	230	146	301	295	208	92	154	375	330	433	328	324	301	581	499	332	501
MMERGLN_LTR	16	18	24	29	35	12	17	14	23	27	19	20	15	3	18	31	20	23	17	23	19	16	12	11	34	43	29	16	15	16	16	21	13	21	27	19	29	11	25	20	32	95	40	36	70	38	29	14	53
MMERVK10C-int	247	377	333	215	426	488	314	573	963	361	462	452	233	107	152	230	291	317	261	282	229	218	231	302	374	688	368	400	615	429	432	363	414	431	340	275	212	124	106	207	238	436	225	273	263	239	395	393	1321
MMERVK10D3_I-int	16	21	38	28	49	19	28	36	25	23	36	49	47	16	53	56	42	86	32	58	37	50	27	59	33	71	33	45	45	16	60	22	26	28	45	19	60	38	16	39	66	55	47	46	49	26	44	72	84
MMERVK10D3_LTR	6	10	2	16	20	7	7	4	6	7	11	10	5	10	17	3	2	11	3	9	5	6	4	8	14	9	14	5	3	4	13	1	10	3	12	5	10	10	5	3	15	8	13	4	3	4	4	2	33
MMERVK9C_I-int	429	515	473	540	637	537	446	629	448	469	485	842	660	351	706	660	849	810	663	704	734	644	585	1048	415	412	352	243	386	379	413	404	404	227	350	299	705	317	271	615	417	691	594	681	575	751	497	1235	443
MMERVK9E_I-int	70	119	159	132	209	290	249	168	160	175	235	303	219	61	127	162	320	237	129	105	207	129	88	260	249	214	184	136	210	201	190	231	175	105	182	185	100	77	83	119	206	290	176	253	173	200	113	353	292
MMETn-int	27	165	443	12	549	271	111	56	111	298	496	194	83	22	103	75	320	336	413	106	63	238	82	183	33	118	75	123	206	78	58	38	62	56	27	24	121	96	63	151	138	99	59	91	66	317	317	473	424
MMSAT4	23996	30877	17082	24341	10919	7332	12268	15418	10846	13884	19336	22799	41716	25180	29648	32307	34102	32164	25781	19908	17223	19407	13387	21381	12930	13085	11464	7522	11003	24191	15622	13600	9236	6926	11065	7429	15961	6975	7629	12952	9578	20127	12243	10471	17872	19914	22450	19800	14125
MMTV-int	1	0	12	0	0	1	3	1	0	0	0	0	3	2	0	7	0	5	13	0	1	0	0	0	0	9	11	0	1	0	0	0	1	0	0	0	0	0	0	0	0	2	9	0	0	5	11	7	6
MMVL30-int	104	153	125	341	94	66	147	165	339	116	236	137	336	99	251	118	242	377	237	2221	285	137	228	226	156	182	184	70	205	469	93	150	79	176	207	122	76	50	63	121	141	213	243	251	181	233	308	399	279
MRLTR33	215	380	223	270	184	158	171	233	165	155	237	284	430	220	247	252	296	218	281	245	282	242	143	318	192	210	181	152	137	220	156	183	179	129	196	110	148	64	115	248	96	314	176	198	278	215	208	225	60
MT-int	253	458	251	238	204	199	293	289	229	247	298	290	304	186	293	182	274	255	275	199	286	266	277	567	533	850	644	222	317	237	239	312	241	191	341	251	277	114	191	371	714	1550	806	418	601	453	617	399	12784
MT2A	10985	9059	4959	13275	14654	5297	11067	7485	6811	11831	12907	14631	13137	5663	10803	8114	14439	7675	7882	17361	6037	8101	11142	19097	13612	10586	9677	13188	24664	11807	16906	10759	12330	4841	8094	7329	8213	11892	2528	5487	8306	9487	9137	15842	8519	8880	8173	13611	3722
MT2B	362	499	360	423	341	253	338	414	331	439	412	460	541	294	414	350	476	396	379	447	451	406	321	715	418	569	497	282	462	356	331	435	347	211	445	278	361	217	216	422	376	696	535	481	528	556	560	561	764
MT2B1	730	1016	682	589	887	806	1007	1445	1218	1408	1206	1121	1050	416	719	798	878	849	984	1203	1754	993	900	2126	1302	2356	2131	916	1382	1047	901	1568	1163	936	1932	1196	1096	517	1124	1852	1165	2725	1838	1903	1331	1987	2319	1542	2394
MT2B2	91	94	88	103	98	85	94	130	110	142	103	157	136	123	180	135	195	237	171	176	212	142	188	277	133	185	130	86	108	94	81	130	83	89	142	106	107	73	75	107	138	204	151	161	179	186	158	170	1796
MT2C_Mm	31	46	26	26	41	28	33	30	25	37	40	27	51	17	26	57	97	82	54	61	30	46	26	70	24	44	40	21	52	14	32	33	30	35	63	20	49	23	25	41	47	90	40	41	32	62	87	108	2307
MT2_Mm	532	467	492	456	577	359	499	630	431	897	844	1136	814	426	605	572	850	645	725	1198	928	1060	951	1463	619	682	588	532	870	531	574	560	534	268	532	360	1201	726	618	947	932	1617	999	1193	929	1346	1217	1329	89276
MTA_Mm	3485	4851	2315	3258	4054	3025	4417	4259	3692	4914	4959	5895	4618	2664	4504	2787	4829	4178	4567	4274	5812	5679	5532	9714	7730	11719	8621	3688	5358	4235	3730	4610	3842	3449	5037	3593	5905	2993	3647	5950	9553	17867	11724	7928	7709	8479	9932	7957	113057
MTA_Mm-int	7294	12102	5428	6764	6769	5794	8204	7569	7300	7835	8354	8647	8651	4709	8288	4359	7920	6844	6456	5311	8211	7488	8303	15137	15655	25924	19663	6417	9365	7122	6452	9151	6633	6316	10520	6835	8521	3245	5749	10490	21311	45787	23156	12671	17599	13807	18143	11250	329938
MTB	427	459	274	404	545	440	506	577	495	673	644	948	571	342	636	450	806	766	709	763	913	826	857	1248	756	894	705	445	574	471	524	574	507	418	601	493	765	510	392	689	869	1560	1250	1027	854	1111	1080	1262	3049
MTB-int	150	226	109	167	197	110	125	221	163	234	265	298	167	124	194	124	239	218	211	214	167	251	173	312	221	367	260	138	146	166	167	205	157	136	214	128	213	110	142	169	315	432	389	205	237	226	267	261	2435
MTB_Mm	484	556	302	491	738	527	656	848	592	829	853	1118	726	360	677	461	728	666	634	1152	1157	1008	886	1532	1111	1182	956	821	983	695	761	722	610	461	670	560	1154	810	662	858	1167	1800	1379	1472	1140	1195	1168	1709	974
MTB_Mm-int	189	180	172	151	245	141	175	225	169	330	374	352	227	141	178	217	187	166	156	201	149	251	166	322	252	313	211	217	265	188	235	235	230	127	231	195	220	160	127	198	306	595	341	351	210	225	280	228	648
MTC	1588	1654	1100	1360	2425	1727	2096	2435	1926	3006	2656	3041	2445	1262	1995	1736	2339	2255	2322	3709	3320	2584	2256	4428	3361	3687	2914	2715	3197	2513	2536	2530	2386	1537	2566	1981	2786	1972	1662	3153	3298	5836	4616	4252	3422	4098	4118	3910	2061
MTC-int	6788	6802	4049	5103	4713	3277	6935	8508	5586	7666	7976	15752	7486	4290	6085	4381	5840	4317	4067	5264	4684	5219	3744	7673	7062	5910	4884	5558	6912	3568	5630	4036	4189	3222	2850	3558	4228	2429	2288	3904	4824	6384	4510	4707	5066	5135	4630	3987	4353
MTD	3123	3850	2991	3167	3261	2243	3090	3760	3270	4045	3948	4739	4937	2610	3844	3435	4587	4507	4134	4463	4270	3653	2826	6362	3880	5442	4214	2788	4042	3278	3012	3482	2877	1994	3818	2725	3275	2087	1952	3649	3734	6976	5064	4423	4355	5047	5575	5677	5187
MTD-int	94	98	88	103	181	123	208	235	162	229	281	313	152	105	157	100	217	186	109	245	141	227	105	320	214	289	219	246	237	177	200	190	198	133	219	191	181	133	93	201	254	278	316	402	251	248	267	321	224
MTE-int	68	76	144	86	86	133	101	124	78	101	116	167	160	115	411	262	392	518	549	239	248	245	194	249	123	184	129	103	80	124	95	96	103	80	122	102	136	94	64	97	146	275	185	137	139	180	209	418	287
MTE2a	998	1358	1144	1040	1220	799	935	1076	923	1380	1552	1434	1934	1023	1484	1275	1968	1630	1474	1853	1390	1322	1131	2356	1150	1568	1182	893	1185	1202	1058	1180	1066	653	1321	853	1127	784	599	1148	1137	1949	1486	1535	1395	1597	1805	1873	1340
MTE2a-int	15	7	11	1	9	15	11	26	6	7	15	11	24	14	7	13	8	21	7	17	9	8	3	19	18	25	22	12	22	12	5	15	12	3	9	6	26	4	5	12	13	30	9	12	39	14	30	26	14
MTE2b	574	740	543	630	878	479	554	715	568	743	877	1227	1094	491	880	677	1231	1118	910	1164	1010	869	887	1328	769	833	747	495	597	748	584	655	589	371	636	455	650	488	301	614	619	1278	815	690	787	1005	1001	1507	1114
MTE2b-int	53	64	73	33	50	46	50	50	71	70	70	99	117	71	76	62	155	90	188	49	109	78	77	118	93	81	106	34	30	74	38	81	55	48	102	50	60	14	22	88	81	129	106	90	72	109	134	75	90
MTEa	752	891	798	777	790	656	735	831	692	836	861	1016	1347	743	1060	928	1631	1446	1137	1284	1248	926	858	1569	963	957	968	728	1090	737	805	747	709	437	763	503	884	666	520	862	1040	1566	1190	1150	1096	1062	1154	1517	1524
MTEa-int	20	47	61	40	56	36	16	42	42	59	25	72	90	36	98	61	160	184	145	107	83	81	60	118	23	22	95	24	36	44	39	28	41	25	25	29	11	47	14	52	71	67	50	31	51	38	100	87	102
MTEb	265	332	319	291	289	210	262	302	295	347	389	440	431	260	487	387	645	685	524	467	472	406	391	596	354	504	395	230	334	247	237	245	261	178	353	215	279	185	157	307	374	615	425	426	407	473	521	657	936
MTEb-int	1	4	5	5	10	15	10	10	0	13	7	23	16	7	11	6	35	50	19	7	28	16	10	27	6	5	4	12	12	2	4	4	9	0	1	7	3	3	9	5	5	31	32	10	25	28	20	21	32
MURVY-LTR	17	34	23	18	27	39	24	29	37	47	42	62	8	19	39	38	57	50	32	35	38	20	19	66	29	44	20	23	38	25	10	47	17	21	62	15	10	19	17	37	47	41	57	25	36	21	34	43	126
MURVY-int	4	0	5	2	2	2	2	1	2	2	0	1	1	1	1	5	5	49	0	1	2	0	5	1	0	5	2	1	7	2	1	2	0	2	3	2	1	1	4	9	0	8	2	0	5	10	6	30	55
MYSERV-int	25	57	29	17	37	18	23	25	24	44	40	54	71	25	41	36	65	63	44	26	39	38	63	41	41	49	38	18	23	24	31	20	21	11	23	18	43	15	18	21	40	42	30	37	36	20	31	81	56
MYSERV16_I-int	434	468	678	481	391	255	352	410	352	497	590	721	1025	466	701	556	941	626	970	798	394	449	405	778	335	541	403	216	295	473	283	344	278	220	425	242	361	176	162	331	294	537	358	376	446	565	852	569	519
MYSERV6-int	213	302	209	276	238	208	202	242	167	274	356	382	448	231	298	360	360	361	789	443	446	312	266	398	327	391	292	218	275	337	269	326	252	139	317	149	230	164	156	311	368	789	626	338	327	373	391	391	419
MamGyp-int	55	188	124	93	79	32	83	166	97	80	137	183	89	11	79	35	69	71	56	51	113	72	110	87	100	47	93	53	104	53	111	111	63	51	63	105	61	28	16	58	40	103	54	72	103	101	62	112	43
MamGypLTR1a	0	1	0	1	0	1	1	0	1	0	0	2	0	0	0	3	2	4	0	2	3	2	3	0	0	0	5	0	1	0	0	0	2	0	1	5	0	0	1	0	0	1	0	1	0	1	6	2	0
MamGypLTR1b	0	0	3	6	1	3	0	0	0	1	2	0	0	6	13	5	7	2	4	6	1	3	4	11	5	3	0	7	2	5	1	0	4	4	0	5	3	2	2	8	12	14	6	0	2	8	9	10	1
MamGypLTR1c	10	9	8	10	19	12	9	16	11	14	16	5	7	11	18	11	22	18	9	20	26	9	11	24	19	17	8	8	6	11	12	2	10	9	27	6	7	8	8	13	11	17	15	11	12	9	15	15	0
MamGypLTR1d	0	0	0	2	0	0	0	0	0	0	1	2	0	1	1	0	2	1	0	0	2	2	0	0	0	0	0	0	0	0	0	0	0	0	0	0	0	0	0	1	0	0	0	1	1	1	0	4	0
MamGypLTR2b	0	0	0	1	0	0	0	2	1	0	2	0	2	0	0	0	5	3	3	2	2	0	0	0	0	5	0	5	1	1	0	0	0	1	0	6	1	3	0	0	0	0	0	0	0	0	4	3	0
MamGypLTR2c	3	0	0	0	1	0	0	1	0	0	0	0	0	0	0	0	2	1	0	0	0	0	0	3	2	0	4	1	4	0	0	2	0	1	1	0	4	0	1	2	0	6	0	0	0	0	2	1	0
MamGypLTR3	0	0	0	0	0	0	0	0	0	0	0	0	0	0	0	0	2	2	2	0	0	0	0	0	0	1	0	0	0	0	0	0	0	0	0	1	0	0	0	0	3	0	0	0	0	0	0	0	7
MamGypLTR3a	2	3	1	0	6	5	1	1	4	0	1	1	5	2	2	15	10	3	9	2	5	2	2	4	0	2	4	1	2	3	2	6	5	0	2	0	3	4	6	2	2	4	0	4	5	3	3	11	1
MamRep1151	42	43	59	30	15	16	25	21	17	29	43	36	74	35	56	34	41	55	66	30	34	28	32	32	20	53	22	15	16	24	21	19	12	12	29	5	21	9	14	25	13	69	26	13	21	45	30	25	41
MamRep1161	0	0	0	0	0	0	0	0	0	0	0	0	0	0	0	0	0	0	0	0	0	0	0	1	0	0	2	0	0	0	0	0	0	0	0	0	0	0	0	0	0	0	0	0	0	0	0	0	0
MamRep137	68	86	69	36	48	45	59	82	106	122	109	138	108	33	50	64	64	43	74	70	90	72	41	116	92	178	96	64	123	75	75	116	69	38	115	58	37	21	37	72	78	122	89	83	73	96	105	64	18
MamRep1527	1	2	13	3	0	1	1	5	14	4	4	4	2	0	1	2	3	7	13	8	12	1	5	20	6	30	8	3	1	4	0	2	9	6	13	9	3	0	9	17	10	37	4	10	2	14	5	22	23
MamRep1879	0	0	0	0	0	1	0	0	0	0	0	0	0	0	0	0	3	0	0	1	1	0	0	0	0	0	0	0	0	0	0	0	0	0	0	0	0	1	0	0	0	0	0	0	0	0	0	0	0
MamRep1894	2	7	2	10	3	2	10	10	2	3	1	15	3	0	7	9	5	5	10	3	1	3	2	10	7	13	8	5	5	8	9	3	4	2	11	1	7	9	2	6	4	20	15	14	11	10	5	6	118
MamRep38	0	2	6	0	1	2	2	4	1	2	1	1	5	6	2	2	3	9	0	0	7	2	2	2	2	6	2	0	0	6	3	1	1	2	8	2	6	0	3	3	2	9	20	0	7	5	9	4	7
MamRep4096	8	7	6	2	3	8	2	5	2	4	5	7	13	6	2	1	10	6	3	5	8	4	0	6	8	10	10	6	7	4	13	8	4	1	5	3	4	1	0	3	3	12	2	5	8	6	5	5	17
MamRep434	245	291	239	261	168	100	204	238	192	298	285	348	396	223	290	234	326	231	351	271	231	230	159	449	261	395	274	188	299	312	167	301	230	142	359	179	192	112	137	194	228	331	242	327	299	332	430	344	60
MamRep488	0	0	0	2	0	0	1	0	0	1	1	2	2	2	0	0	0	0	0	0	0	0	1	1	1	1	1	0	0	0	0	0	1	0	2	2	0	0	0	0	0	1	0	0	2	0	0	2	8
MamRep564	0	5	0	1	5	0	1	5	1	4	6	3	4	9	2	2	3	3	4	1	0	1	1	0	1	0	8	3	3	2	2	3	3	0	2	0	0	0	0	1	1	1	5	2	1	0	1	5	7
MamRep605	15	34	26	27	29	30	25	29	32	35	68	45	39	13	14	6	33	29	44	32	23	37	25	25	82	55	35	61	60	57	44	30	36	16	44	25	50	17	22	19	21	16	15	74	30	12	30	70	43
MamSINE1	51	75	93	60	54	47	72	76	58	51	67	52	119	63	85	93	106	106	72	102	72	91	68	114	63	104	62	35	42	34	29	42	47	26	49	24	53	20	33	65	63	82	101	57	99	137	107	71	56
MamTip1	0	1	1	1	0	1	1	0	0	1	1	2	0	0	0	0	2	2	0	2	3	0	0	0	0	1	0	0	0	1	2	0	1	0	1	0	1	0	0	1	2	1	1	0	1	0	2	1	0
MamTip2	871	978	850	941	924	580	744	1116	743	728	1215	1223	1476	696	943	879	993	874	1042	1276	1049	1218	869	1729	1208	1154	989	992	1083	1097	909	736	795	548	851	535	737	473	527	792	792	1262	886	1034	1054	1428	887	1034	193
MamTip3	278	238	152	298	338	118	232	167	122	254	211	229	302	181	284	190	341	260	203	497	231	216	289	731	296	292	182	252	383	236	285	171	169	98	169	143	202	250	96	180	227	273	219	356	270	321	318	364	62
Mam_R4	4	3	2	0	0	0	0	1	0	0	0	1	0	2	2	1	3	7	1	0	1	0	0	2	6	2	0	0	0	0	0	0	0	0	3	0	1	0	0	3	0	3	0	0	1	0	0	1	2
MuLV-int	11	0	3	4	6	3	0	2	13	1	2	7	3	3	0	8	17	21	5	7	0	0	2	4	2	19	2	5	7	0	0	9	1	2	2	1	3	3	2	2	4	11	1	1	6	0	0	7	2
MuRRS-int	16	23	7	7	4	8	7	12	6	7	10	26	7	23	14	32	46	64	13	16	13	21	20	17	11	17	12	6	3	13	13	7	7	4	7	9	26	17	8	6	11	26	12	23	13	18	27	74	24
MuRRS4-int	213	362	263	253	206	245	259	302	281	435	362	460	365	208	329	401	415	335	247	397	354	314	278	465	354	446	364	223	350	323	293	375	253	215	405	238	317	166	197	362	377	532	363	366	386	469	471	388	341
MurERV4-int	137	216	186	104	153	113	110	196	129	183	222	338	281	134	231	187	334	347	309	295	269	247	130	226	152	191	180	153	146	245	152	247	116	95	209	149	108	113	54	141	210	371	251	223	282	238	221	274	199
MurERV4_19-int	17	43	24	27	28	24	18	34	19	25	31	21	69	21	26	20	38	67	36	30	14	16	11	41	26	23	36	15	21	14	20	24	23	9	32	19	13	7	9	46	24	54	51	45	39	30	46	61	260
MurSAT1	0	0	0	0	0	1	0	1	0	0	0	0	0	1	0	0	0	26	0	0	0	0	0	0	0	0	0	0	0	0	0	0	0	0	0	0	0	0	0	0	0	1	1	0	0	0	1	12	0
MurSatRep1	6326	8597	6033	6688	4920	3973	5071	7015	5345	6505	7213	9325	11323	5992	8255	7922	9092	6997	8940	7508	8559	6769	5321	10602	5294	6403	5521	2917	4125	6113	5246	5591	3868	3353	5460	3595	5212	2317	2806	6073	3647	8066	5970	4677	6412	8224	9498	7405	6602
MusHAL1	237	185	237	196	240	113	152	134	123	258	262	371	317	140	285	176	393	349	208	270	122	162	182	360	170	124	107	139	187	238	129	225	193	83	248	146	112	69	58	82	104	202	127	199	159	178	178	270	154
ORR1A0	84	110	92	89	110	80	70	107	46	82	111	156	113	46	75	117	168	182	71	118	112	90	82	151	115	142	106	77	117	143	90	96	69	70	104	68	56	47	49	81	134	174	97	94	100	117	106	201	15158
ORR1A0-int	87	100	112	88	99	58	74	67	54	91	131	205	162	32	32	79	142	170	42	104	98	62	69	162	117	183	123	84	126	142	87	140	64	66	97	64	53	36	43	84	142	179	122	112	112	84	110	149	37901
ORR1A1	268	282	213	200	261	196	223	247	188	335	317	365	428	234	359	318	448	419	418	329	414	351	313	508	312	389	368	234	310	298	314	332	213	170	293	224	281	181	156	266	378	533	350	430	367	332	378	451	6968
ORR1A1-int	88	138	87	157	164	132	142	134	126	190	211	267	217	82	91	85	188	182	87	121	178	211	122	250	225	265	259	168	225	222	177	153	115	112	185	103	139	69	68	129	292	241	180	210	266	196	124	288	17047
ORR1A2	731	735	555	604	760	567	652	757	630	837	823	1114	1047	505	832	686	1018	958	756	1056	970	855	722	1374	1118	1274	1214	756	1066	813	818	800	661	483	718	572	777	474	441	864	1072	1774	1059	1260	1211	1085	1131	1253	5014
ORR1A2-int	392	518	187	440	493	379	558	610	511	511	613	738	542	229	257	240	415	448	350	494	589	493	311	782	891	1157	957	556	796	634	596	576	443	302	598	543	529	266	348	625	580	1220	786	907	688	671	764	743	6470
ORR1A3	397	435	216	272	222	193	340	368	309	374	380	412	472	265	307	265	322	396	234	372	359	267	313	622	526	576	598	311	331	269	237	359	271	185	351	263	342	168	212	388	419	735	456	416	444	526	574	508	1261
ORR1A3-int	120	175	81	67	102	57	112	129	100	154	222	269	118	57	109	99	151	189	154	157	179	122	106	164	245	305	178	148	176	144	172	147	154	105	144	116	129	37	110	117	179	151	196	135	199	141	200	152	7877
ORR1A4	579	753	650	637	543	416	556	760	560	580	656	898	1078	516	664	585	788	717	826	709	783	608	454	994	775	841	828	418	641	444	539	584	463	361	589	459	479	324	326	724	683	1262	799	798	782	779	831	926	759
ORR1A4-int	78	129	90	156	113	83	125	132	113	134	133	285	243	147	132	129	194	288	201	160	171	199	140	293	213	171	200	146	122	144	148	132	121	65	117	95	160	105	87	124	187	198	154	281	220	233	195	232	659
ORR1B1	824	809	736	847	834	644	772	763	724	969	1117	1383	1252	728	961	810	1336	1376	1084	1326	964	934	903	1873	961	1298	1017	769	1050	947	866	821	727	507	991	641	832	739	493	860	986	1282	1102	1268	853	1129	1203	1646	1380
ORR1B1-int	46	123	118	96	67	135	63	125	70	99	102	99	174	69	132	117	168	164	142	133	126	115	96	139	92	146	138	85	108	104	89	89	62	49	79	78	107	79	49	66	105	181	121	129	132	109	141	190	344
ORR1B2	386	346	274	456	248	259	238	320	228	299	324	433	538	310	386	324	640	635	514	333	372	333	288	574	348	414	328	167	334	332	246	321	197	150	308	185	227	172	147	248	293	489	308	270	338	333	392	478	516
ORR1B2-int	55	34	43	22	30	28	22	39	24	20	35	61	44	20	73	26	88	70	102	29	67	30	45	54	55	32	39	21	24	15	27	41	20	26	17	35	31	17	17	24	29	113	47	33	37	58	72	110	310
ORR1C1	781	663	440	704	938	613	656	710	607	794	1079	1212	1033	438	694	662	1039	903	693	1160	799	746	829	1426	1138	1053	1007	989	1168	876	819	743	829	418	735	577	875	651	399	712	1079	1468	1074	1404	913	1054	905	1163	717
ORR1C1-int	936	698	767	820	616	326	387	680	386	523	621	1083	1670	755	1372	1029	1260	1189	726	1135	725	729	596	1033	414	467	357	291	445	450	490	376	377	237	253	275	450	391	185	382	417	654	615	411	632	811	768	645	122
ORR1C2	760	712	590	737	748	484	549	702	512	574	730	884	1049	553	621	584	1032	1041	680	848	542	702	586	1196	759	866	707	549	786	661	546	551	520	372	565	308	531	436	321	436	609	886	540	757	825	683	748	842	624
ORR1C2-int	55	77	59	75	93	68	53	85	46	108	85	147	116	80	94	97	96	107	33	94	76	28	62	208	61	88	84	39	95	67	85	80	99	52	59	50	50	37	18	49	40	99	86	95	58	118	92	132	92
ORR1D-int	3	0	0	4	4	2	4	3	0	5	7	6	2	2	4	4	16	16	1	12	3	5	2	2	3	10	6	4	3	1	10	4	6	5	2	3	0	3	3	1	1	5	9	3	8	3	15	10	14
ORR1D1	1439	1430	1415	1285	1264	1003	1106	1389	994	1198	1454	1934	2018	1252	1681	1748	2085	2110	1640	1753	1573	1529	1266	2121	1186	1240	930	941	1183	1018	1087	907	790	536	1052	665	930	768	519	1082	1112	2068	1269	1173	1442	1378	1346	1948	1711
ORR1D1-int	43	65	77	63	62	61	41	75	62	75	94	64	92	70	119	62	127	153	77	99	122	87	67	153	69	88	93	76	76	55	48	65	87	46	146	62	64	45	36	60	121	255	138	86	133	128	160	162	294
ORR1D2	1170	984	1064	1155	1092	707	908	1048	797	1301	1228	1684	1867	1044	1365	1409	1793	1552	1672	1659	1382	1259	1008	1957	965	1220	1042	888	1133	1100	880	1027	885	539	1098	808	1191	731	578	992	1230	1971	1187	1273	1156	1403	1513	1834	1294
ORR1D2-int	90	85	62	101	112	83	103	96	63	130	78	123	120	52	85	75	100	121	138	101	113	71	75	133	89	183	115	73	98	91	102	65	97	66	96	77	80	56	63	101	83	156	85	95	123	104	127	171	368
ORR1E	780	816	882	795	804	670	723	818	641	901	988	1098	1409	813	1217	1008	1518	1605	1252	1447	1266	1031	940	1621	932	1172	953	670	827	713	632	816	667	410	848	629	805	625	428	924	929	1606	1154	1097	1093	1163	1459	1726	1421
ORR1E-int	45	46	21	32	38	44	29	44	62	82	54	50	101	51	46	55	86	111	55	85	69	37	91	102	31	69	48	33	65	61	21	70	54	31	74	47	48	43	31	98	72	120	67	81	73	61	134	145	120
ORR1F	1858	2385	1762	1849	2150	1214	1775	1971	1645	2499	2482	3105	3786	2077	2250	2025	3067	2728	2243	2761	2361	2094	2159	3803	2204	2778	1884	1622	2101	1811	1836	1896	1630	1186	1899	1459	2103	1677	1138	1673	2609	4120	2416	2586	2730	2493	2909	3480	3257
ORR1F-int	0	3	2	5	0	1	4	3	4	6	6	5	0	2	3	0	9	22	4	4	10	10	8	9	1	1	1	4	1	2	0	0	6	1	4	1	1	1	0	0	11	6	2	1	14	10	35	9	67
ORR1G	1387	1470	1030	1420	1253	701	1083	1322	876	1174	1578	2082	2192	1030	1580	1404	2096	1474	1402	1627	1249	1239	1198	2287	1385	1247	1031	1042	1396	1195	1140	1035	959	589	1142	787	1130	844	566	1112	1333	1782	1213	1262	1488	1464	1404	1353	564
ORR1G-int	10	13	1	4	0	5	6	5	5	14	7	1	28	2	5	4	2	2	12	11	15	15	12	21	8	15	24	5	4	8	1	3	9	12	11	1	10	8	2	4	22	46	0	12	17	21	28	5	49
ORSL	23	61	46	22	36	16	24	28	23	25	35	43	73	39	39	44	51	49	56	36	24	34	13	37	20	13	30	9	24	21	21	28	20	13	27	16	21	10	11	20	23	21	22	22	32	25	23	23	0
ORSL-2a	0	0	1	2	0	0	5	0	0	0	1	1	1	0	4	6	6	2	0	0	0	0	0	0	0	3	1	0	0	0	0	0	0	3	0	0	0	0	0	1	1	4	0	0	0	0	0	1	14
ORSL-2b	7	37	20	35	15	5	23	9	25	22	40	19	29	32	28	27	45	48	14	40	21	10	17	18	10	7	18	5	9	8	15	27	24	11	21	13	18	10	4	16	15	15	33	22	14	12	30	31	22
PB1	2641	3311	2800	2901	2337	1435	2106	2616	1990	2603	3216	4163	5317	2834	3804	3083	4125	3676	3986	3547	2944	2699	2015	4602	2320	2721	2180	1753	2363	2382	1883	1924	1744	1197	2192	1360	2102	1421	1205	2216	2163	3704	2599	2404	2709	2832	2893	3232	1726
PB1D10	15253	17345	13337	16024	14085	8133	11725	12902	9863	15563	18418	22244	24271	12965	19121	15553	21443	17594	18687	19616	14582	13522	10876	24687	14287	16272	12727	11817	15427	13919	13087	12912	12142	7016	12590	9776	12589	9797	6690	11953	11582	18841	14332	15575	13460	16736	16387	17820	8399
PB1D11	4827	5898	4052	4774	4515	2458	4116	4840	3516	4955	5286	6685	7269	3815	4619	4077	5527	4750	3889	5078	3903	3916	3465	6767	5637	6328	5106	4478	5839	4127	4908	4282	4085	2402	4225	3166	3767	2779	1846	3657	4258	6236	4196	4705	5015	4930	5135	5130	2529
PB1D7	4978	6232	4696	5379	5088	2715	4202	4686	3607	5333	6431	8055	8643	4275	6260	5298	6583	5738	5878	6976	4732	4660	4244	8534	4916	5302	4430	3908	5331	4744	4230	4001	3919	2403	4090	3115	3925	3160	2150	3750	4306	6398	4861	5276	4848	5351	5300	6057	3420
PB1D9	4810	5535	4358	5605	4776	2526	4033	4471	3291	4894	5790	7264	8340	4560	6527	5127	7475	6617	6073	6574	4294	4775	4476	8288	4624	4938	3785	3764	4741	4199	3936	3672	3528	2186	3766	2654	3792	2974	1951	3518	4021	6264	4520	4887	4746	5032	5056	5809	3868
Plat_L3	260	274	212	194	191	149	193	201	197	235	259	467	333	169	311	259	360	274	287	333	329	343	257	463	218	267	228	197	236	192	229	163	177	119	175	149	234	137	120	243	204	448	268	256	278	337	271	361	193
RCHARR1	1307	1504	937	1063	663	358	779	767	586	983	1224	1335	2060	1056	1311	1401	1859	1542	1667	1416	1030	1224	1143	1863	948	1079	884	658	995	1025	695	771	606	544	778	598	779	520	411	711	1002	1552	1041	1028	1128	1170	1155	1268	1226
RLTR1	0	0	0	0	1	0	0	0	4	0	0	0	3	0	8	0	1	2	0	5	4	0	0	0	0	0	0	0	0	1	0	0	0	0	0	0	0	0	0	0	0	0	1	0	2	0	0	0	2
RLTR10	45	90	107	59	156	92	102	130	73	109	119	149	56	32	50	46	126	161	70	109	102	110	96	234	130	231	218	98	126	102	104	137	122	93	157	126	104	55	67	109	123	201	100	146	154	167	184	251	100
RLTR10-int	199	457	760	226	762	588	536	741	375	610	620	425	135	92	209	212	326	361	274	401	220	193	391	647	549	1968	1062	401	1007	460	439	719	793	452	1225	1188	277	269	215	478	380	973	277	665	372	979	588	613	339
RLTR10A	110	104	97	73	110	68	72	108	99	107	81	103	149	50	78	26	90	75	98	80	90	66	81	152	149	186	170	60	270	68	53	78	38	53	64	49	121	39	56	85	106	264	90	170	155	158	155	136	293
RLTR10B	11	7	4	0	4	3	9	5	4	7	5	10	8	3	11	2	14	29	12	4	9	5	7	6	4	17	4	2	2	6	1	13	5	2	8	12	7	4	5	6	11	9	10	13	16	9	9	28	15
RLTR10B2	49	39	26	15	79	26	57	63	32	64	49	94	18	13	21	17	40	53	29	24	34	19	34	61	80	52	53	76	66	31	56	54	67	46	25	43	49	30	22	37	33	61	21	56	23	27	23	79	49
RLTR10C	93	99	68	111	88	73	70	122	113	95	117	146	75	78	139	127	221	235	165	109	108	145	107	142	145	228	123	108	162	125	110	103	104	70	107	73	107	60	65	143	113	176	198	156	124	213	187	225	981
RLTR10D	61	129	105	86	206	68	87	54	48	102	83	142	71	75	115	84	253	149	82	243	156	144	142	260	129	108	84	49	131	97	77	99	107	38	52	22	122	111	72	149	311	98	92	195	163	134	189	241	57
RLTR10D2	12	17	6	10	37	9	27	25	12	18	32	72	17	8	17	8	16	10	12	18	20	9	18	11	34	13	23	24	28	15	12	32	21	19	24	12	21	24	7	14	24	23	30	25	17	13	33	44	35
RLTR10E	229	354	253	343	268	108	229	186	184	296	363	396	750	299	471	450	415	410	586	434	314	335	185	481	191	225	175	145	226	225	205	191	157	97	188	130	215	133	122	202	232	293	323	267	292	265	355	302	253
RLTR10F	69	78	60	90	135	30	61	40	51	83	94	78	133	60	81	82	108	107	49	120	56	50	45	136	95	83	56	62	104	78	71	60	41	25	85	36	61	61	33	56	34	88	115	110	98	54	89	65	455
RLTR11A	301	414	313	287	296	174	332	389	262	354	341	532	366	272	388	256	449	446	345	356	412	451	232	654	402	367	350	269	399	370	410	332	254	258	290	253	325	218	184	337	349	479	436	533	551	562	674	489	255
RLTR11A2	73	80	102	78	102	125	70	83	73	81	84	106	97	95	94	103	178	221	98	102	140	106	71	116	99	161	105	66	95	79	85	70	88	52	90	48	48	45	45	107	87	145	130	159	154	121	123	204	102
RLTR11B	275	291	161	183	193	151	200	226	156	230	204	274	263	135	173	126	218	258	237	199	177	257	166	401	379	357	295	212	226	254	244	199	162	140	240	179	187	148	102	175	217	280	326	250	299	339	347	330	166
RLTR11C_MM	13	31	12	22	17	55	5	14	9	11	15	17	40	33	25	32	60	60	20	32	37	24	28	21	19	20	23	19	9	19	28	22	30	12	5	5	9	15	12	20	21	23	13	35	18	36	22	49	81
RLTR11D	0	0	1	0	4	13	0	0	0	3	2	1	4	3	1	10	22	27	2	4	3	2	5	6	5	1	2	2	2	3	2	3	0	3	2	0	1	1	0	0	2	5	5	2	3	2	2	20	2
RLTR12A	0	2	11	1	10	16	5	6	1	7	2	11	8	3	2	5	21	21	15	5	19	5	6	19	5	5	4	3	23	10	5	8	4	4	1	6	6	4	2	4	12	18	1	11	4	14	20	39	8
RLTR12B	328	332	278	317	317	196	205	329	227	309	242	422	735	479	598	571	691	489	642	896	431	573	510	929	354	228	264	239	264	343	300	175	255	195	231	199	560	249	201	373	488	739	371	457	360	507	408	500	261
RLTR12B2	0	0	0	0	0	2	0	0	0	0	0	0	0	0	0	11	1	5	0	0	0	0	0	0	0	0	0	0	0	0	0	0	2	1	0	0	0	0	0	1	0	0	1	0	0	0	4	6	9
RLTR12BD_Mm	78	122	78	127	102	72	68	121	100	101	121	148	226	116	124	100	175	150	140	182	149	95	61	206	117	132	96	74	95	68	73	79	101	59	84	43	69	65	37	74	109	174	141	130	132	179	147	182	159
RLTR12C	38	45	13	23	24	26	30	42	21	25	26	24	41	36	38	15	61	50	17	66	35	39	35	67	26	25	14	9	39	22	39	15	17	16	10	15	28	14	20	27	25	69	50	40	33	37	31	51	38
RLTR12D	111	133	87	105	84	66	91	77	73	90	147	115	202	106	95	71	170	120	114	184	90	133	139	205	70	102	93	56	72	100	62	51	38	56	73	61	114	101	64	90	123	167	74	116	107	140	131	211	131
RLTR12E	16	7	13	19	13	25	16	17	20	23	18	16	18	6	16	15	42	74	35	26	15	27	42	27	19	35	8	14	24	13	8	11	9	1	9	10	11	7	17	11	24	58	19	20	25	38	32	61	85
RLTR12F	0	0	0	0	1	0	0	0	0	0	0	0	0	1	0	0	0	2	0	0	0	0	0	0	0	4	0	0	0	1	0	0	0	0	0	0	0	0	0	9	1	0	2	0	0	3	2	1	0
RLTR12G	75	165	99	99	126	90	58	92	93	97	142	230	244	91	146	123	214	213	149	149	201	104	125	129	82	91	79	75	116	85	55	96	99	48	114	82	72	45	57	86	140	174	96	117	145	138	192	150	75
RLTR12H	0	1	3	0	0	7	5	0	0	7	0	2	6	0	5	6	16	17	4	0	1	0	3	3	2	2	2	4	0	0	1	2	0	0	0	0	1	1	0	8	1	2	8	4	6	6	1	23	13
RLTR13A	11	36	37	17	11	18	17	24	9	9	13	20	36	12	18	18	44	56	37	16	12	11	33	13	10	8	12	6	10	14	5	11	3	4	9	11	18	13	9	13	9	21	20	15	33	39	52	28	48
RLTR13A1	0	11	4	1	3	38	0	4	0	1	2	4	0	1	0	1	14	20	4	8	3	17	1	5	0	2	0	0	1	3	2	1	1	1	0	2	0	3	2	1	5	4	0	4	0	0	3	32	0
RLTR13A2	26	28	27	15	22	18	26	28	17	26	34	29	46	26	45	16	57	78	39	25	32	21	34	30	18	7	15	17	19	24	4	20	16	1	15	12	24	9	9	17	19	41	11	18	44	40	42	48	39
RLTR13A3	6	7	15	9	6	10	9	4	9	16	6	12	18	7	3	15	19	27	13	18	5	3	10	23	17	10	1	10	15	16	4	3	6	4	10	11	21	8	8	11	4	18	8	8	13	11	31	21	21
RLTR13B1	128	120	79	113	69	343	67	114	91	101	89	134	165	82	73	78	144	254	53	68	65	47	56	110	128	179	181	83	114	139	62	76	53	45	83	18	58	27	32	79	114	178	94	90	94	109	170	591	106
RLTR13B2	15	16	2	8	2	266	3	12	3	10	0	17	8	8	8	10	99	72	13	5	5	7	2	23	8	12	7	9	8	14	7	1	3	0	5	4	9	2	1	6	13	42	21	8	11	16	5	255	17
RLTR13B3	8	29	23	22	15	110	19	11	11	4	14	43	17	16	14	5	62	50	17	9	29	23	4	41	22	25	26	23	12	18	15	20	12	8	14	11	21	8	6	28	23	61	12	34	15	13	21	137	113
RLTR13B4	9	23	15	11	12	46	5	15	5	11	5	21	19	12	24	21	47	46	12	8	15	13	6	17	5	10	1	5	8	1	10	2	4	5	4	6	5	6	3	10	11	27	9	14	9	14	21	78	21
RLTR13C1	9	21	20	12	11	31	28	17	13	5	23	34	21	17	70	18	52	62	37	32	20	20	23	39	28	2	8	7	21	22	5	18	5	5	7	7	18	22	0	12	30	27	23	9	16	2	23	98	2
RLTR13C2	200	359	239	386	218	235	253	264	178	217	278	354	353	160	277	186	348	327	177	155	115	115	166	355	227	195	181	242	200	348	212	187	174	77	112	78	115	108	63	94	179	190	111	86	145	114	130	449	100
RLTR13C3	0	1	2	0	1	54	1	0	3	2	2	1	0	0	0	4	34	45	0	0	6	3	9	6	9	3	1	0	0	3	0	0	1	2	3	0	2	1	0	2	8	1	5	0	0	4	0	96	9
RLTR13D	0	0	1	0	0	0	0	0	0	0	0	2	0	0	0	0	0	2	6	0	0	0	1	0	0	2	1	0	0	0	0	0	0	0	1	0	0	0	0	0	1	0	0	0	0	0	2	5	5
RLTR13D1	5	3	6	5	5	15	9	1	5	9	12	7	2	5	7	4	13	9	9	6	22	6	6	19	8	9	6	6	5	4	1	13	3	7	5	3	8	5	9	13	15	14	9	22	17	18	15	23	126
RLTR13D2	1	4	13	2	3	5	2	1	3	1	9	2	4	4	23	4	41	19	15	8	8	21	2	5	6	1	4	3	0	6	1	7	1	5	6	3	8	12	0	10	15	15	5	5	7	12	10	26	25
RLTR13D3	1	7	5	2	5	15	0	3	1	4	1	15	8	1	10	9	22	27	0	1	4	1	3	1	1	2	6	1	0	3	1	4	1	13	2	1	0	2	5	0	9	3	7	2	4	11	1	48	21
RLTR13D3A	0	4	2	2	0	6	9	0	9	2	9	14	0	6	7	2	12	5	5	8	12	0	0	5	9	2	7	4	2	12	1	2	4	10	12	0	0	0	2	5	6	8	3	4	13	1	2	13	4
RLTR13D3A1	134	181	57	172	218	53	111	168	110	132	227	249	406	174	231	89	212	141	222	249	107	159	155	267	104	141	176	127	162	163	120	135	142	47	150	136	195	70	107	151	99	188	114	231	230	356	318	358	217
RLTR13D4	29	3	1	5	1	30	1	3	0	2	6	1	3	2	0	0	30	37	0	0	1	2	0	6	2	2	2	2	1	3	3	0	0	3	0	4	0	5	1	0	14	0	3	1	0	0	2	55	1
RLTR13D5	19	20	12	29	19	80	8	13	28	13	22	29	49	29	26	41	49	95	70	49	29	28	28	57	19	27	55	16	18	16	0	19	5	6	23	22	0	1	7	64	49	30	22	23	52	42	86	168	1611
RLTR13D6	36	22	46	48	57	385	49	63	48	65	77	92	58	40	56	48	215	247	57	63	66	53	72	97	55	114	83	51	60	62	66	81	55	39	121	36	42	30	35	71	79	72	103	83	129	80	117	535	239
RLTR13E	120	69	132	163	103	175	82	95	83	83	108	157	144	154	119	166	241	146	171	109	81	76	74	146	81	137	76	55	73	89	61	85	68	16	84	70	78	49	13	71	103	115	81	69	169	105	89	200	181
RLTR13F	6	3	2	4	12	31	2	4	1	3	1	3	1	3	4	8	19	29	5	2	2	7	1	8	2	3	7	3	3	16	2	3	1	0	2	0	1	0	1	2	2	5	4	3	8	6	3	42	37
RLTR13G	4	18	15	17	28	171	7	4	3	12	17	25	4	6	7	13	92	71	24	21	9	23	5	18	15	8	2	12	18	21	10	6	6	3	2	2	23	6	2	9	11	15	12	3	14	10	5	161	88
RLTR14	1897	1625	874	1473	1449	671	1521	1568	1079	1474	1587	2084	2043	1092	1414	1283	1592	1218	984	1602	1362	1382	1376	2405	2462	1942	1568	1977	2461	1797	1831	1118	1294	713	895	938	1924	1351	742	1304	1977	2295	1854	1889	1587	2051	1531	2086	1303
RLTR14-int	285	423	383	432	407	259	323	526	311	359	293	514	602	328	665	607	693	664	602	635	630	512	381	875	316	349	286	152	302	235	440	238	286	215	251	187	552	293	230	468	351	597	517	459	472	649	492	763	493
RLTR14_RN	797	881	537	992	663	234	558	523	379	712	957	953	1391	692	1011	772	1237	678	647	890	500	455	422	1241	729	688	539	501	636	578	560	707	662	260	477	424	547	432	220	417	413	662	551	676	413	647	568	740	128
RLTR15	137	78	109	81	102	97	68	75	75	136	106	169	210	96	157	119	221	168	152	155	76	114	113	221	78	87	63	73	61	104	68	111	97	66	100	80	124	67	36	65	80	108	121	74	105	145	129	239	101
RLTR16	146	142	209	154	158	66	103	126	117	153	186	292	256	212	196	185	183	227	153	186	156	122	76	221	132	196	158	115	131	131	172	142	125	77	136	132	160	89	50	103	140	228	175	189	147	202	232	284	122
RLTR16B_MM	23	49	31	38	21	31	34	32	23	34	30	60	44	32	73	27	70	67	34	50	35	56	40	70	33	76	35	29	65	28	13	35	43	15	41	22	33	34	14	20	31	46	16	40	49	47	31	54	2
RLTR16C_MM	12	17	4	5	9	5	7	17	17	13	13	14	16	8	0	3	15	21	5	7	15	5	5	23	19	17	6	9	10	12	17	15	21	5	21	6	9	7	5	8	3	13	22	9	7	23	9	17	25
RLTR17	32	59	32	21	13	69	28	29	11	28	45	54	63	20	50	11	165	153	54	59	45	32	30	53	40	29	27	13	36	26	17	22	19	19	38	9	22	22	15	32	27	62	35	32	19	29	49	117	72
RLTR17B_Mm	5839	4771	3275	793	348	619	324	434	394	474	587	1107	1099	513	800	588	1440	1347	1504	630	599	647	652	736	369	584	533	381	607	738	814	1138	300	445	1060	1142	281	208	199	465	372	1001	484	1007	570	1810	723	654	618
RLTR17C_Mm	2	0	11	0	1	10	0	2	1	2	6	3	1	2	0	12	13	17	13	12	12	3	11	6	0	15	3	4	4	3	13	2	1	0	0	1	2	5	5	1	8	1	1	6	3	7	14	11	0
RLTR17D_Mm	390	583	384	367	294	286	255	391	312	404	500	896	768	412	605	376	630	434	735	353	565	562	423	739	514	276	316	288	327	583	219	356	323	226	220	199	509	374	237	367	198	549	238	369	305	597	532	533	335
RLTR18	79	98	70	95	96	53	63	60	56	77	82	186	82	91	117	130	149	127	161	116	100	148	79	203	87	111	84	87	127	88	91	111	85	33	75	80	84	87	58	100	104	98	66	119	87	88	115	182	139
RLTR18-int	14	32	5	16	12	16	32	51	20	31	13	27	35	20	7	8	22	18	26	14	27	17	14	12	59	109	67	37	39	26	27	28	10	14	14	37	19	6	12	26	38	98	30	31	52	36	31	33	64
RLTR18B	87	140	136	114	120	62	105	127	103	128	150	183	184	92	71	67	194	117	60	122	96	79	79	149	127	142	147	77	121	127	88	133	130	61	136	60	79	49	35	94	69	180	90	113	92	133	179	113	56
RLTR19	36	53	31	27	34	38	25	33	32	48	44	57	73	25	31	31	75	76	40	35	44	58	22	89	39	44	46	16	35	22	12	32	20	10	18	19	15	19	12	9	17	36	27	31	37	47	44	38	1379
RLTR19-int	991	1039	1408	969	1616	1063	1160	1159	1157	1773	2111	2701	1849	770	1326	1091	1840	951	1310	2180	1769	1379	1241	2429	1203	1415	1039	1454	1071	1494	1240	1581	1315	930	1422	1148	1435	1082	763	1347	1416	2612	1891	1748	1318	1686	1712	1946	684
RLTR19A	35	23	12	7	7	4	16	5	5	11	26	13	64	29	40	17	15	30	8	11	8	21	12	32	36	41	23	10	22	16	16	11	11	13	17	12	17	19	6	19	17	39	20	19	9	25	40	34	64
RLTR19A2	0	1	0	0	2	4	1	1	1	0	2	0	1	4	0	1	3	1	0	1	1	0	0	0	0	0	4	0	0	0	0	1	0	0	0	0	0	0	0	1	1	0	0	2	0	0	0	4	10
RLTR19B	2	1	6	2	1	4	5	1	0	6	3	6	9	1	6	6	12	5	1	7	5	4	3	7	2	2	2	0	1	1	3	5	1	4	4	2	2	6	2	1	4	8	3	0	5	7	9	13	19
RLTR19C	10	8	14	8	10	12	15	18	13	9	8	17	10	4	10	8	6	17	15	9	27	7	14	16	28	21	31	18	4	26	13	3	15	5	6	9	10	9	6	10	51	53	36	4	39	20	35	30	96
RLTR19D	1	0	0	0	0	0	0	0	3	0	2	0	0	0	0	2	1	4	5	0	2	0	0	0	4	0	0	0	0	0	0	0	1	0	5	0	0	5	0	0	8	13	3	0	0	9	1	0	0
RLTR1A2_MM	133	222	231	181	215	109	166	204	182	193	134	167	225	102	275	154	193	240	317	210	255	223	158	387	259	347	311	175	267	187	153	222	231	111	307	147	118	126	88	232	130	382	215	272	196	293	381	237	107
RLTR1B	41	63	45	64	44	35	48	66	35	40	57	104	72	44	64	60	75	53	70	78	50	54	78	83	64	81	54	55	32	56	51	61	54	19	63	42	39	33	27	54	67	128	112	58	78	48	64	97	253
RLTR1B-int	439	438	404	559	436	396	363	568	436	606	544	670	828	402	474	462	610	544	982	700	837	623	523	896	444	603	411	482	372	606	426	529	372	276	648	321	551	377	341	632	536	951	513	578	692	726	910	969	947
RLTR1C	28	17	24	12	27	10	18	31	7	31	22	19	65	40	49	47	51	33	42	32	22	13	12	45	30	24	14	9	14	27	13	11	12	8	28	7	12	18	9	9	17	31	25	25	29	22	38	39	129
RLTR1D	38	132	73	51	69	35	59	72	37	62	115	48	139	48	118	84	127	126	75	70	102	60	126	190	80	123	50	68	37	56	45	93	47	23	90	35	92	62	64	64	107	128	51	138	109	53	170	91	99
RLTR1D2_MM	8	5	5	10	11	23	10	3	9	4	13	7	8	17	49	16	45	31	36	55	24	14	12	26	24	5	22	11	3	8	7	13	12	4	5	2	36	9	5	24	31	10	7	22	20	20	16	35	28
RLTR1E_MM	1	5	12	8	5	3	3	5	0	5	3	4	5	4	4	5	12	5	5	5	2	3	6	7	4	3	5	2	3	1	5	0	1	2	4	1	6	2	0	2	4	4	1	6	3	5	4	10	1
RLTR1F_Mm	9	2	0	1	8	5	0	2	3	0	0	0	0	3	0	10	5	1	10	2	0	0	0	0	6	7	0	1	0	5	3	0	2	0	0	0	2	0	0	1	0	0	6	8	0	13	21	15	33
RLTR20A	0	0	0	3	0	7	0	2	0	0	0	1	2	0	0	0	20	5	0	3	2	4	10	8	0	1	5	1	5	0	0	0	0	0	3	0	3	1	0	0	10	3	4	1	1	0	2	3	2
RLTR20A1	12	1	19	8	5	10	2	6	6	15	9	35	59	22	9	23	38	17	22	19	26	5	11	29	12	2	3	13	1	23	9	7	10	5	15	5	5	21	12	12	10	16	6	19	17	21	15	28	0
RLTR20A2	0	0	1	0	3	2	0	0	0	0	0	0	0	0	0	0	9	17	0	0	0	0	0	2	0	0	0	0	0	0	0	0	0	0	2	0	0	0	0	0	1	1	0	2	0	0	0	7	0
RLTR20A2B_MM	10	2	0	6	0	4	1	3	0	0	1	1	4	3	3	4	10	15	2	5	13	0	1	3	0	0	0	0	1	2	3	2	1	1	2	0	0	1	0	0	5	0	3	3	10	4	3	21	30
RLTR20A3_MM	4	39	17	48	21	12	18	28	21	16	18	29	48	14	21	31	52	57	6	19	27	13	25	30	38	34	18	14	14	22	22	25	28	21	27	27	22	9	14	33	8	30	26	31	23	36	28	42	30
RLTR20A4	1696	1979	1778	1848	1589	971	1196	1510	1212	1745	1925	2655	3182	1826	2432	2195	2620	2274	2440	2120	1961	1985	1830	2813	1395	1570	1298	1244	1477	1610	1545	1371	1171	714	1421	1049	1641	962	846	1283	1483	2334	1477	1501	1635	1882	1816	2204	943
RLTR20B1	73	46	45	45	53	37	69	51	41	52	67	84	177	34	76	92	122	85	93	64	55	67	45	149	57	49	62	41	82	29	69	33	29	18	28	26	51	47	23	42	80	104	77	105	62	64	58	132	63
RLTR20B2	1	3	3	0	3	12	3	1	6	2	2	5	1	1	3	0	18	20	4	7	3	0	0	0	2	0	7	2	0	0	0	8	2	2	0	0	6	0	0	3	3	9	0	0	6	9	4	12	0
RLTR20B3	3	10	14	4	8	13	9	19	6	13	14	5	5	4	2	13	26	32	12	20	20	2	3	24	18	28	20	16	12	11	19	13	5	17	12	12	14	8	6	18	15	24	18	20	31	12	40	38	13
RLTR20B3A_MM	0	12	2	5	4	10	2	0	2	9	2	6	9	7	10	8	35	20	6	5	5	0	3	6	1	4	0	3	3	4	2	2	1	0	2	8	2	5	0	6	11	5	2	4	11	1	1	25	24
RLTR20B4_MM	0	0	0	1	0	8	4	0	0	0	0	1	11	0	0	0	7	11	0	0	0	3	3	1	0	7	5	3	9	0	0	0	1	0	0	0	0	0	0	3	0	0	0	0	0	0	0	4	1
RLTR20B5_MM	10	22	21	24	40	39	35	30	15	31	46	61	51	19	84	50	68	83	66	94	145	71	90	105	37	35	47	23	32	25	45	53	18	31	41	44	74	17	37	66	95	123	110	119	101	85	200	148	27
RLTR20C	0	0	1	0	2	4	0	3	2	1	2	2	2	0	2	0	15	10	0	0	7	3	0	0	1	1	1	0	3	2	0	2	0	1	1	3	0	1	0	0	2	0	3	5	5	5	1	8	2
RLTR20C1_MM	1673	1794	1561	1770	1685	944	1539	1668	1234	1893	2369	3125	2803	1682	2339	1883	2648	2009	2403	2381	1653	1942	1694	3210	1923	1822	1427	1625	2098	1646	1640	1442	1317	880	1316	1107	1683	1193	801	1396	1546	2187	1785	1915	1852	1953	1781	1871	952
RLTR20C2_MM	60	108	88	95	60	56	71	67	41	73	83	121	109	86	106	84	137	143	120	86	55	82	32	103	68	106	89	44	96	79	88	82	64	41	46	61	70	58	34	61	35	139	45	90	68	86	87	63	95
RLTR20D	191	194	98	195	111	75	91	110	127	162	277	315	311	144	163	169	302	157	246	255	119	103	122	154	134	186	116	146	218	194	180	181	144	63	160	128	132	94	84	110	178	171	138	166	158	104	161	129	96
RLTR21	607	605	533	694	403	209	323	506	386	555	647	647	998	685	1189	1013	863	1002	1251	877	588	702	652	810	429	492	309	293	291	426	287	325	297	202	370	201	546	278	250	372	284	729	490	474	674	661	718	741	329
RLTR22_Mur	32	59	50	35	35	23	15	27	24	32	42	71	69	40	68	47	87	99	87	65	38	59	41	78	33	53	34	32	35	85	25	34	23	47	67	23	39	23	27	37	37	56	59	34	50	87	47	135	89
RLTR22_Mus	13	47	34	41	35	37	29	33	14	32	36	63	27	4	5	17	48	65	46	14	12	44	14	32	34	52	15	30	40	22	21	34	26	26	24	14	25	17	10	24	33	32	44	14	24	11	37	70	52
RLTR23	13	27	15	23	33	83	24	23	15	23	38	33	41	12	29	47	113	96	30	43	52	35	32	60	18	10	23	18	22	23	11	17	14	16	26	18	40	18	14	25	15	42	45	33	43	39	45	128	181
RLTR24	21	40	19	30	29	72	31	57	32	45	55	60	23	37	27	32	76	66	42	53	39	41	28	65	58	25	32	33	36	22	37	34	47	36	60	35	37	19	16	40	69	60	73	36	25	33	46	68	30
RLTR24B_MM	11	14	4	12	4	6	7	7	5	6	13	6	18	9	16	6	10	39	30	19	21	20	13	28	6	33	16	11	13	9	5	6	9	6	6	3	15	3	4	18	11	36	13	5	18	17	12	25	14
RLTR25A	17	30	33	33	20	116	13	23	13	24	39	22	46	13	39	12	91	69	16	43	20	22	17	48	18	37	35	10	22	31	17	11	5	11	33	20	27	9	14	22	30	35	34	23	26	29	30	130	85
RLTR25B	79	124	75	107	59	183	78	80	53	88	87	81	132	75	100	124	197	181	107	90	95	73	58	120	100	120	93	45	74	70	43	55	68	44	98	50	90	39	48	74	92	188	137	109	104	117	137	300	415
RLTR26	0	0	0	0	0	8	2	0	3	3	0	1	0	1	4	1	9	10	5	0	0	0	0	1	0	2	0	0	0	1	0	0	1	1	0	0	5	1	1	2	7	3	1	1	2	0	2	12	37
RLTR26B_MM	0	5	0	4	2	5	3	2	7	11	2	1	2	6	7	1	20	19	3	4	4	0	11	7	12	1	1	1	0	4	1	0	1	1	0	0	5	1	2	2	2	2	11	2	11	2	10	15	10
RLTR26C_MM	433	529	305	377	471	275	482	551	267	464	526	524	599	254	417	417	469	312	360	573	491	569	477	730	678	570	411	542	630	497	543	392	424	215	353	291	464	293	206	358	614	765	404	534	490	563	297	465	156
RLTR26D_MM	4	5	3	0	1	10	1	8	3	9	3	10	0	9	1	3	18	19	1	8	1	6	4	6	9	7	3	5	0	2	1	1	2	1	7	5	3	5	3	3	4	14	1	5	4	3	6	14	9
RLTR26_Mus	24	17	10	8	26	24	32	26	20	30	41	35	21	3	25	12	64	51	22	24	33	23	11	51	38	33	43	18	26	18	14	24	15	8	28	17	13	11	22	17	41	54	32	23	23	17	31	59	73
RLTR27	239	327	154	275	305	106	262	267	259	312	496	427	365	160	160	195	254	159	126	258	176	165	190	327	367	393	281	241	326	207	330	293	314	196	249	226	284	121	164	260	272	518	302	360	308	196	357	276	341
RLTR28	45	52	57	34	26	54	35	60	40	62	89	83	86	24	67	61	122	122	50	53	34	53	19	104	40	74	45	47	55	54	36	55	40	31	43	60	48	28	18	32	56	90	69	70	49	44	61	76	68
RLTR28B	45	33	87	55	38	26	41	67	45	40	57	26	55	34	24	40	51	57	38	52	35	58	37	56	60	81	86	25	60	48	5	44	52	35	69	69	29	11	32	40	42	110	51	53	54	107	76	39	48
RLTR30	17	21	51	13	71	9	26	12	21	25	47	33	81	21	34	22	44	81	42	55	41	55	30	90	45	50	25	10	30	21	37	35	31	26	26	23	38	26	23	38	48	67	32	14	51	16	68	64	105
RLTR30B_MM	4	0	0	0	0	5	0	1	0	0	1	9	2	0	17	0	12	14	14	0	2	2	4	3	0	0	0	1	2	0	6	4	0	0	0	0	7	2	0	8	0	0	5	4	0	2	0	9	12
RLTR30C_MM	0	2	0	2	0	1	1	0	1	0	1	1	0	0	7	0	1	1	1	0	0	0	0	0	2	3	3	2	1	2	0	3	0	1	0	0	1	1	2	5	0	1	1	0	2	1	0	0	14
RLTR30D2_MM	14	15	23	31	17	10	12	8	10	10	23	13	10	20	24	25	66	48	59	43	22	22	21	50	18	22	9	22	32	18	16	18	28	23	16	8	23	12	8	17	29	41	41	38	26	34	31	25	47
RLTR30D_MM	3	3	2	0	4	5	6	4	1	1	4	9	17	3	0	5	6	7	4	0	0	12	0	11	11	35	6	13	13	4	5	3	4	2	9	5	3	5	4	2	7	27	12	1	5	4	3	9	107
RLTR30D_RN	0	3	1	0	0	8	2	1	4	6	5	2	3	3	6	4	3	2	5	4	3	3	3	0	0	11	8	1	9	2	0	2	0	5	5	2	5	2	0	12	0	0	2	1	9	1	6	2	31
RLTR30E_MM	244	167	167	209	107	52	80	101	73	153	187	150	572	238	356	311	429	334	334	182	134	164	160	283	84	76	51	59	65	69	75	58	57	43	48	49	42	60	28	71	44	97	74	71	87	78	121	96	52
RLTR31A_Mm	0	1	0	1	2	2	0	2	2	0	1	1	0	3	4	0	1	3	1	3	0	2	1	2	0	4	1	0	0	0	0	0	1	0	3	4	0	0	3	2	0	2	1	4	3	3	5	4	3
RLTR31B2	318	332	228	321	218	197	262	313	288	399	365	485	481	261	271	212	305	282	371	359	285	280	224	408	337	475	251	250	296	391	302	242	215	133	261	169	220	158	105	187	286	275	233	225	318	314	271	263	86
RLTR31B_Mm	7	4	1	1	8	8	5	13	5	9	8	14	1	3	1	6	9	19	0	9	13	13	5	4	1	8	4	6	6	9	4	10	5	4	7	7	7	6	0	4	7	13	19	17	13	11	17	14	2
RLTR31C_MM	34	47	25	20	40	30	49	56	40	45	32	48	28	6	39	17	35	32	21	40	38	33	32	68	46	75	76	32	41	38	33	29	45	16	48	25	25	24	24	38	38	74	56	54	51	64	50	50	43
RLTR31D_MM	255	263	197	256	312	153	246	245	184	272	355	335	366	165	347	267	417	367	217	353	218	286	243	468	338	295	268	260	331	258	345	265	238	128	209	161	179	195	95	204	289	366	240	299	250	283	228	328	447
RLTR31M	78	93	110	41	68	63	58	60	37	58	116	151	163	63	106	89	132	85	97	138	127	80	79	186	103	100	94	88	112	83	35	67	42	49	76	66	143	62	44	117	123	239	93	113	142	121	141	153	168
RLTR31_Mm	23	14	2	16	7	8	9	16	8	13	14	19	26	15	3	4	21	10	9	13	4	10	10	9	36	26	25	6	7	21	3	6	5	5	15	8	20	6	8	10	8	11	7	10	5	7	11	36	5
RLTR31_Mur	4	8	5	8	2	3	1	4	0	11	9	14	5	7	2	6	21	18	5	1	7	8	6	2	5	6	10	2	10	11	9	4	10	1	6	0	10	9	8	4	1	6	6	7	13	0	14	4	18
RLTR33	227	254	185	258	149	95	121	168	98	175	301	357	295	159	225	203	276	265	188	291	205	154	163	203	232	147	159	129	141	381	286	178	199	113	178	102	135	106	109	187	165	263	286	194	201	261	214	427	104
RLTR34B_MM	14	28	27	23	10	23	23	32	21	13	35	53	44	18	63	40	36	53	66	45	19	24	28	29	32	38	29	27	32	35	16	29	17	12	26	18	29	30	11	26	28	27	37	63	30	41	54	51	136
RLTR34C_MM	0	17	1	3	3	12	14	10	5	22	2	16	0	7	20	3	21	25	6	6	14	8	5	24	18	16	2	12	7	1	9	20	5	0	15	10	1	9	3	2	21	2	6	11	7	34	4	39	29
RLTR34D_MM	2	9	0	3	4	11	7	12	16	9	4	6	14	1	1	3	17	16	13	5	7	9	12	22	12	14	6	3	22	4	9	7	11	1	10	4	6	9	4	1	5	13	15	3	20	6	18	13	19
RLTR35B_MM	32	0	5	9	5	15	4	8	7	8	17	19	55	37	49	24	33	41	39	45	37	86	63	77	10	17	3	8	13	4	0	7	3	3	9	2	108	50	20	31	18	54	20	48	25	54	56	181	60
RLTR3_Mm	6	20	30	1	0	2	4	1	8	0	11	2	0	9	7	18	1	9	7	4	16	5	8	6	2	4	2	1	6	2	4	1	1	1	5	4	3	2	3	6	0	9	14	8	7	12	15	16	126
RLTR40	3701	3900	3749	4609	3496	1579	2660	3270	2231	2705	3333	4950	7082	3243	6076	5549	7404	5573	7428	5017	3697	3916	3140	6860	3224	3415	2556	1721	3022	3625	3881	2990	2182	1650	2961	1461	3568	2441	1492	2830	2595	3685	3599	4361	3351	4581	3702	5950	2209
RLTR41	57	117	72	91	93	110	64	56	86	92	141	98	219	153	197	157	229	177	157	152	160	145	121	193	76	58	80	33	47	84	83	90	58	39	85	72	118	82	60	65	52	137	86	102	130	126	110	205	252
RLTR41A2	6	0	6	3	8	6	10	19	7	14	14	13	9	2	8	10	18	32	25	32	17	9	6	17	14	10	14	15	18	11	2	12	10	10	8	13	19	5	0	10	15	45	22	31	9	14	19	27	20
RLTR41B	9	0	6	7	0	5	2	2	0	1	0	5	7	4	9	12	7	3	12	7	3	3	7	3	0	6	4	1	2	1	2	1	2	0	0	0	3	4	3	1	3	4	11	2	9	6	17	8	29
RLTR41C	27	45	29	39	53	95	37	30	33	47	45	53	63	30	39	52	68	73	49	51	42	46	36	86	51	67	43	67	91	48	37	59	37	20	42	33	69	39	38	38	77	118	57	76	41	44	47	92	17
RLTR42	8	4	6	12	10	11	2	11	4	13	13	14	9	9	14	8	14	20	24	17	11	24	15	10	14	10	9	2	11	5	7	10	6	8	7	3	6	5	4	8	2	23	12	5	10	12	6	64	13
RLTR42-int	212	250	196	176	180	140	207	236	158	214	189	287	357	120	350	233	332	324	261	308	188	271	192	388	238	257	184	129	199	219	167	207	180	97	215	162	171	135	93	210	182	286	210	261	202	230	381	320	203
RLTR43C	3	10	0	1	12	3	0	9	5	3	11	2	5	3	10	5	12	3	1	7	12	7	8	18	8	8	8	5	4	6	8	0	1	1	7	0	6	5	3	2	4	5	8	8	5	5	12	4	0
RLTR44-int	43	34	72	39	56	24	32	48	30	31	33	91	102	41	75	56	68	57	87	50	52	45	41	101	20	41	31	33	35	37	37	27	32	7	21	16	70	29	23	42	55	74	45	18	48	62	42	54	70
RLTR44A	7	12	23	14	15	5	5	8	10	20	8	10	24	3	12	21	33	7	37	10	27	7	1	18	4	31	10	4	11	3	13	3	7	1	15	2	11	8	13	21	11	21	8	8	10	13	18	18	34
RLTR44B	3	0	4	4	3	3	1	3	6	2	5	14	5	5	3	2	18	7	3	1	6	3	2	8	6	3	4	3	6	0	2	3	2	5	4	2	1	3	1	5	2	4	4	1	8	5	4	8	27
RLTR44C	28	26	27	31	32	17	22	24	26	17	37	42	77	15	71	42	33	84	63	44	34	47	29	76	9	33	39	23	31	26	18	35	24	5	29	3	37	13	16	23	32	55	22	29	21	31	28	64	53
RLTR44D	1	5	2	7	0	0	1	0	6	0	1	0	0	0	2	5	7	9	9	0	8	0	1	2	0	6	4	4	6	1	0	2	1	0	1	0	0	0	0	5	2	3	1	1	5	1	0	3	0
RLTR44E	0	15	0	8	5	7	14	0	2	0	2	13	0	1	0	1	20	10	12	2	7	0	1	5	12	10	5	0	4	3	12	3	6	2	10	14	5	1	6	2	5	17	0	0	8	9	6	26	19
RLTR45	99	144	145	209	151	83	73	85	81	117	165	185	236	133	154	144	236	195	262	163	122	135	111	235	122	107	90	103	101	138	77	99	103	60	103	59	93	77	49	107	142	258	147	142	119	119	134	204	331
RLTR45-int	190	340	340	358	201	132	206	252	274	265	279	349	482	166	392	188	320	283	400	271	181	164	140	290	185	242	179	147	228	255	92	133	150	97	155	92	148	107	71	154	265	338	227	145	188	238	281	233	953
RLTR46	0	2	2	0	0	0	1	0	1	5	0	0	0	0	0	4	2	4	0	1	0	0	1	0	4	0	0	2	4	4	0	3	0	0	5	0	1	0	0	0	6	1	0	0	2	0	0	6	8
RLTR46A	12	11	7	4	9	3	10	15	11	9	23	7	7	4	4	15	12	10	7	6	0	17	10	12	25	14	13	20	30	22	4	11	13	0	18	6	13	3	1	0	16	21	14	19	11	11	16	22	88
RLTR46A2	0	0	0	0	0	1	0	0	0	0	0	0	0	0	0	0	2	3	0	0	0	0	0	0	0	0	0	0	0	0	3	0	0	0	0	0	0	0	1	0	0	0	0	0	0	2	0	6	0
RLTR46B	0	0	0	0	0	0	0	0	0	0	0	0	0	1	0	0	4	5	0	0	0	0	0	1	0	0	0	0	0	0	0	0	0	0	0	0	0	0	0	0	1	1	0	0	0	4	0	1	1
RLTR47	0	0	7	0	0	1	0	0	0	3	2	0	0	1	2	0	3	10	0	2	0	0	3	2	1	1	1	1	3	0	0	1	1	1	0	0	0	1	2	2	1	7	2	0	0	2	5	4	44
RLTR47_MM	6	8	7	4	3	4	0	4	3	4	6	2	7	5	5	4	6	4	6	1	3	1	3	2	4	3	1	0	3	4	8	3	2	3	4	7	2	1	2	3	1	4	1	2	2	3	6	10	1
RLTR48A	5	1	7	7	14	18	11	7	9	35	10	30	19	10	11	11	27	53	25	32	28	41	16	21	20	20	21	18	17	21	18	22	17	5	7	5	16	16	9	16	17	38	9	20	25	16	20	42	219
RLTR48B	0	0	0	0	1	4	0	0	0	0	0	3	0	0	0	0	4	6	1	0	0	0	1	0	0	0	0	0	0	0	2	0	1	0	0	1	0	0	0	1	0	1	0	1	1	0	1	10	12
RLTR48C	134	158	137	201	101	42	97	119	90	123	139	157	326	75	133	113	196	108	77	160	53	37	43	139	174	169	135	110	196	115	91	106	100	69	104	34	67	47	18	73	71	177	114	144	125	103	123	98	61
RLTR49	191	172	150	167	149	78	116	165	100	153	116	224	255	121	119	158	211	178	175	202	142	183	104	261	136	172	149	140	142	134	145	144	82	88	156	99	141	81	73	173	159	236	137	202	151	158	180	214	120
RLTR4_MM-int	12	11	18	13	18	8	2	7	25	7	9	8	13	5	8	9	62	62	0	3	4	2	5	14	3	55	4	29	34	2	2	12	12	12	17	12	15	1	5	1	9	2	8	2	27	11	6	24	104
RLTR4_Mm	0	2	1	8	33	6	1	1	32	0	3	12	1	7	4	0	18	24	1	3	1	0	2	15	0	61	0	19	33	12	0	30	6	6	5	0	7	0	6	0	1	2	5	1	3	0	0	15	23
RLTR50A	0	1	0	0	0	0	0	0	0	0	0	0	0	0	0	0	2	2	0	0	0	0	0	0	0	0	0	2	0	0	0	0	0	0	1	0	0	0	0	1	0	0	0	0	1	0	1	3	5
RLTR50B	47	89	62	50	89	73	85	71	87	87	109	112	67	18	65	46	89	54	70	104	62	75	119	138	131	148	124	85	136	76	81	98	77	47	68	78	72	50	49	102	90	92	90	123	110	89	153	156	148
RLTR51A_Mm	79	155	99	133	96	45	92	73	92	138	117	176	182	87	160	117	136	152	146	108	126	89	76	164	120	131	101	96	108	130	86	106	90	65	134	91	93	56	48	85	74	199	120	87	133	122	139	252	211
RLTR51B_Mm	110	83	39	59	61	40	37	61	62	51	60	79	61	35	15	66	56	64	32	41	27	27	20	86	128	189	169	69	117	75	62	64	37	27	83	34	56	18	33	45	97	142	68	80	94	47	81	94	120
RLTR53B_Mm	7	0	2	0	0	1	3	5	1	3	3	1	0	1	2	2	5	4	3	1	7	0	3	2	1	6	0	1	4	8	1	4	2	0	2	2	3	0	0	2	1	2	0	3	2	4	5	0	8
RLTR53_Mm	3	10	14	6	12	10	6	20	17	13	6	27	27	12	9	17	28	28	27	41	19	30	10	15	14	21	12	20	33	9	22	12	16	13	19	1	14	8	6	26	26	67	30	31	15	35	33	36	6
RLTR5_Mm	4	4	18	12	11	12	7	12	4	7	17	4	8	1	20	14	49	24	30	14	7	7	21	15	7	4	9	1	3	1	13	4	12	7	1	11	8	6	12	7	14	16	10	8	20	15	5	50	3
RLTR6-int	614	705	338	597	497	297	413	544	426	704	536	920	887	440	678	537	631	606	571	698	778	775	528	907	769	726	691	470	511	573	652	365	382	308	516	324	556	344	448	658	779	1190	647	709	661	851	1046	702	327
RLTR6B_Mm	583	484	282	583	499	228	314	437	286	505	486	694	889	449	665	633	669	514	640	570	593	533	403	928	546	585	502	386	465	466	537	423	331	210	364	270	449	358	266	379	589	839	506	677	547	603	712	730	374
RLTR6C_Mm	5	11	3	14	1	9	10	7	18	3	9	12	19	4	6	7	17	14	7	126	7	2	18	3	5	1	3	2	16	27	11	3	4	6	18	0	3	2	1	7	2	12	6	3	3	5	2	30	4
RLTR6_Mm	25	18	33	90	34	7	48	38	65	27	61	29	104	32	53	31	53	99	34	442	54	26	74	47	25	60	38	26	55	128	47	15	31	29	65	25	41	17	7	32	61	44	40	52	27	28	30	149	95
RLTR8	6	5	4	5	8	14	17	21	14	25	48	39	48	5	23	29	44	28	33	35	20	14	14	25	12	8	22	12	35	23	5	32	29	11	16	17	21	7	9	22	19	48	21	24	23	15	22	33	41
RLTR9A	1	16	23	2	21	96	14	21	32	16	10	33	12	10	22	5	61	53	22	26	16	17	11	38	21	18	24	10	14	17	14	25	8	12	21	42	12	11	13	17	30	33	23	26	28	19	24	43	29
RLTR9A2	2	5	6	4	11	42	4	5	7	9	3	11	3	3	2	8	27	20	7	10	8	4	10	1	9	13	4	1	10	7	0	1	2	5	3	6	5	8	3	0	10	10	0	6	10	6	10	23	4
RLTR9A3	32	27	22	23	73	176	44	35	45	57	60	85	55	20	33	28	112	74	54	49	88	37	25	96	66	85	70	31	58	43	54	68	36	26	57	38	47	23	18	45	58	118	87	64	36	44	73	147	75
RLTR9A3A	9	4	6	10	6	19	9	7	6	7	15	11	1	2	4	10	12	22	80	13	17	8	5	5	11	5	7	12	2	1	7	4	5	5	10	6	2	1	5	6	21	34	11	14	12	8	6	21	77
RLTR9A3B	1	27	3	3	2	26	5	9	9	22	10	4	14	5	4	19	28	30	5	14	18	10	3	13	11	12	9	11	6	7	12	16	8	8	15	9	12	8	3	9	6	13	18	5	4	12	18	48	2
RLTR9A4	0	0	1	3	0	1	0	0	0	0	0	0	3	0	0	0	4	0	1	0	0	1	0	5	2	0	0	0	0	4	0	3	4	0	0	3	0	2	0	0	0	3	3	0	0	0	1	1	0
RLTR9B	4	0	3	3	5	45	6	4	8	3	4	5	16	1	2	0	42	17	7	2	8	10	9	16	15	1	6	17	4	5	0	2	4	0	9	2	4	6	0	5	9	36	1	15	7	7	14	17	1
RLTR9B2	0	5	0	0	4	21	1	0	0	2	1	2	2	0	0	0	14	12	0	1	2	0	0	3	0	0	4	1	0	0	0	2	3	0	1	0	5	1	0	0	2	3	1	3	0	0	0	7	3
RLTR9C	6	0	2	4	1	5	6	4	3	1	10	5	6	4	1	14	19	22	4	10	2	1	0	10	4	7	3	2	4	11	0	0	7	0	8	1	11	8	4	1	8	11	9	4	4	1	8	36	5
RLTR9D	99	154	84	87	122	280	96	137	72	93	171	238	203	66	161	78	315	208	160	217	98	141	100	231	51	107	85	87	103	158	103	119	73	39	72	66	108	53	35	144	111	113	215	108	141	95	171	257	187
RLTR9D2	35	43	25	29	32	116	44	40	26	52	36	73	42	26	29	30	78	60	28	55	43	25	23	49	47	78	77	31	48	54	59	45	27	29	59	35	21	16	15	48	35	70	52	38	35	66	43	84	31
RLTR9E	70	106	47	76	76	457	95	67	74	105	61	147	150	65	94	102	420	297	103	96	72	64	87	154	93	98	95	68	70	86	68	70	77	45	78	35	99	37	44	82	127	158	96	93	133	101	112	393	323
RLTR9F	9	4	2	33	11	36	19	24	19	20	40	38	26	4	23	7	24	19	4	22	22	16	17	28	21	49	41	31	43	23	28	36	16	13	17	9	53	12	18	19	45	43	16	32	28	29	24	49	44
RLTRETN_Mm	46	37	47	37	126	134	46	52	25	81	102	127	55	21	82	87	211	190	199	163	104	169	137	166	73	86	51	87	92	71	66	71	70	36	66	32	104	104	38	73	144	155	77	100	86	99	115	251	229
RMER10A	61	125	81	64	115	289	94	95	114	130	136	142	149	34	111	89	259	273	77	139	135	123	97	192	136	243	160	126	182	133	73	117	74	59	129	107	124	56	44	126	149	276	118	172	157	165	163	293	186
RMER10B	99	115	76	99	108	118	92	113	75	86	119	151	191	87	137	103	208	211	171	100	137	117	147	205	137	142	156	101	141	112	67	86	58	56	81	50	138	59	81	123	202	520	184	117	188	199	207	233	186
RMER12	251	261	249	187	264	127	194	170	163	245	257	349	260	134	286	262	358	233	266	287	209	240	235	359	239	257	201	163	292	298	211	195	228	150	263	167	163	168	117	198	219	329	312	242	202	222	259	310	204
RMER12B	27	21	40	52	49	17	29	23	43	29	64	117	26	14	73	51	87	56	35	61	21	55	29	61	43	37	19	18	26	48	33	46	13	21	38	24	30	24	6	28	37	50	44	33	28	25	18	99	54
RMER12C	58	98	84	45	60	37	44	40	45	61	58	97	73	44	53	44	81	90	57	68	40	50	43	71	48	33	38	46	52	52	41	53	31	36	47	15	29	42	20	36	35	73	52	65	62	75	48	98	70
RMER13A	61	91	65	71	77	71	86	103	73	61	73	123	131	87	75	56	112	78	81	95	139	109	78	143	52	71	94	56	73	65	60	60	54	47	73	30	64	58	57	84	118	171	125	122	146	152	146	172	100
RMER13A1	2	4	5	4	5	12	6	13	3	5	8	9	8	1	9	3	42	60	5	6	6	4	1	13	14	7	8	7	9	18	2	2	5	2	9	3	3	3	2	23	10	2	15	5	6	12	7	36	27
RMER13A2	66	37	33	49	66	42	51	60	74	78	91	84	141	38	49	68	142	114	74	60	99	67	34	119	98	152	117	42	69	65	25	44	63	44	85	47	64	42	41	60	88	163	106	114	97	128	128	157	250
RMER13B	270	176	169	205	256	152	217	296	165	235	367	409	532	150	262	294	367	336	209	285	211	218	165	254	228	203	172	168	242	217	208	176	203	136	176	130	221	164	97	176	220	380	175	280	328	233	263	263	272
RMER15	2007	2337	1410	1902	1525	902	1313	1411	1134	1691	2135	2312	3326	1740	2279	2150	2892	2392	2145	2218	1587	1715	1495	2515	1931	1970	1534	1476	1892	2312	1986	1605	1388	884	1544	941	1888	1367	905	1511	1692	2939	1802	2378	1869	2185	2229	2512	2032
RMER15-int	102	87	129	92	67	80	74	85	51	81	98	98	205	93	125	88	168	169	100	47	103	75	49	123	88	68	64	58	67	90	55	72	50	45	54	33	63	55	36	66	95	163	158	91	96	101	106	98	79
RMER16	8	10	34	12	19	11	15	20	16	16	29	22	67	17	18	21	33	46	25	26	58	11	40	37	27	19	23	15	27	26	11	25	18	10	11	15	26	7	13	25	16	37	23	27	30	14	19	66	82
RMER16-int	988	1176	782	879	775	537	746	1208	884	942	1150	1835	1682	770	842	629	1158	916	927	1058	1132	911	583	1373	838	1054	876	487	869	687	700	851	633	469	668	554	689	404	442	730	653	938	815	746	1205	1054	1507	1568	805
RMER16A2	0	1	0	2	2	21	0	2	0	0	0	0	0	3	2	3	16	13	0	2	0	0	0	0	0	0	0	0	2	9	0	0	0	0	5	0	0	1	2	0	1	0	1	5	0	0	0	20	33
RMER16A3	10	8	13	4	11	17	4	4	12	3	4	15	25	8	9	11	21	22	9	7	2	7	2	11	1	1	3	4	2	7	2	4	2	2	5	3	1	2	1	2	4	2	7	3	4	8	4	31	6
RMER16B	7	0	5	2	9	2	2	5	3	13	5	16	3	5	8	2	11	9	14	10	11	10	2	15	4	5	10	4	10	2	9	18	8	4	14	2	1	3	11	8	18	24	15	12	5	10	15	10	0
RMER16B2	0	1	1	0	0	18	1	2	1	3	2	2	0	2	3	3	17	18	1	4	1	0	0	5	1	4	3	0	0	1	0	0	0	0	1	0	0	1	0	0	3	2	0	1	2	0	0	36	32
RMER16B3	0	0	2	0	0	0	0	0	1	0	2	0	0	0	3	1	0	3	1	0	0	0	0	0	1	0	0	0	0	0	0	0	0	0	1	0	2	0	0	0	0	5	2	0	0	3	0	4	8
RMER16C	3546	2506	2058	2973	2501	1270	1989	2310	1518	2405	3548	3706	4023	1573	1730	2724	2829	2264	1731	2384	1372	1912	1632	3117	2797	2362	2046	3091	3669	3028	2971	1890	1740	837	2745	1210	1239	1382	641	1351	1808	2300	1441	1905	1776	1479	1723	1554	531
RMER16_Mm	319	520	221	360	274	125	272	340	296	289	446	544	536	236	317	245	291	266	277	291	320	236	184	412	304	445	323	192	402	267	275	339	261	135	265	197	161	132	116	211	201	328	259	271	329	280	399	357	224
RMER17A	19	22	26	16	11	13	12	6	13	22	14	18	20	17	15	17	36	43	23	26	29	17	20	24	21	21	14	6	24	15	19	13	12	4	20	14	18	15	13	32	80	131	62	47	87	25	61	61	86
RMER17A-int	21	6	17	17	10	14	2	11	4	10	17	30	46	5	37	27	47	12	18	15	8	6	9	27	12	28	29	24	53	27	12	9	25	20	5	10	20	26	5	16	13	8	1	12	24	17	43	22	18
RMER17A2	10	26	19	15	12	16	17	16	7	20	30	32	30	10	37	21	37	53	36	16	21	20	17	41	24	12	7	9	4	7	28	5	11	7	25	12	19	11	20	15	26	18	24	28	17	23	43	47	15
RMER17B	16	37	29	56	55	54	44	33	19	28	43	49	49	63	120	77	140	122	75	96	78	62	66	69	48	55	47	35	48	41	20	33	24	28	59	34	71	28	26	41	55	117	64	59	67	62	89	133	99
RMER17B2	54	30	36	35	21	19	17	23	16	22	31	27	52	9	87	38	90	76	44	46	52	14	25	19	27	15	21	19	18	14	35	40	10	1	10	15	26	31	22	19	50	64	50	27	28	15	43	76	48
RMER17C	187	302	498	249	661	331	323	342	318	582	517	1059	502	376	704	499	689	557	496	1160	782	731	692	1186	437	364	372	441	477	535	454	497	355	283	521	342	856	792	580	902	1123	1633	1036	1410	973	752	997	1357	427
RMER17C-int	122	34	21	38	88	44	48	49	25	68	68	60	64	41	115	63	133	121	143	166	33	120	63	85	78	59	33	61	44	42	55	37	52	28	55	45	61	111	45	83	113	149	78	113	95	71	160	171	63
RMER17C2	19	14	33	12	16	23	14	29	19	25	25	39	21	14	31	16	46	46	37	41	43	41	41	45	27	38	23	26	15	40	30	26	17	15	25	11	15	20	23	33	69	93	53	27	37	37	38	60	39
RMER17D	95	207	246	203	155	140	142	228	169	200	173	181	430	290	338	307	426	422	497	302	359	272	174	363	133	160	152	63	113	116	76	131	136	83	175	125	175	102	170	226	149	264	176	200	216	369	355	384	208
RMER17D2	5	26	66	7	74	66	14	11	16	35	31	28	8	12	45	46	88	81	271	98	107	64	14	57	7	17	17	9	9	23	35	25	19	19	48	15	60	18	14	56	156	48	44	39	89	23	37	99	39
RMER19A	309	481	284	382	568	337	440	492	484	570	647	709	481	275	428	393	473	457	442	704	766	537	462	1142	683	1020	821	484	676	452	506	644	540	379	719	505	611	471	344	711	736	1457	811	1002	747	802	1027	1062	691
RMER19B	1475	2067	1581	1569	1795	1374	1461	2004	1596	2558	2742	2874	2644	1296	1873	1841	2268	2035	2173	2576	2725	1884	1741	3785	2248	3102	2720	1630	2085	1986	1556	2529	1952	1427	2942	1727	1960	1322	1167	2352	2361	4561	2737	2847	2680	3320	3819	2940	2548
RMER19B2	106	148	158	174	173	108	125	186	123	214	228	337	310	177	216	166	276	321	271	281	251	299	157	413	176	231	238	140	175	169	173	180	157	97	195	114	179	110	96	150	219	293	207	215	196	181	228	365	360
RMER19C	320	381	320	370	504	331	361	473	312	548	668	913	679	314	440	430	535	463	606	617	662	590	621	879	570	687	561	390	577	444	523	598	410	230	622	379	568	333	323	567	707	1056	628	786	562	698	814	962	507
RMER1A	138	158	201	157	139	93	139	184	146	205	158	194	222	125	207	191	247	323	197	192	224	133	189	231	153	243	162	100	173	115	120	146	128	90	139	92	167	78	85	173	147	322	199	198	216	293	265	289	412
RMER1B	354	623	560	450	415	311	453	474	347	611	692	707	791	393	951	746	913	874	996	737	916	649	610	953	572	678	577	377	472	438	442	517	360	300	575	376	562	445	319	549	695	1659	806	846	703	952	746	1017	1504
RMER1C	5975	6552	4120	3823	4484	2199	4395	4205	2640	5442	6482	6602	6587	3227	6361	4054	6675	4839	4611	6201	3006	4088	3829	8066	3871	3567	2826	2700	4469	3281	4371	3781	2983	2308	2489	2471	2563	2970	1153	2048	2651	3789	2871	4042	3484	3452	4187	4706	2691
RMER2	75	121	79	61	82	52	70	88	74	54	56	76	78	60	110	56	132	156	74	89	112	86	58	97	50	78	75	39	66	72	60	37	34	24	72	51	33	26	31	65	82	109	78	69	86	108	91	150	319
RMER20A	193	145	92	198	134	170	157	168	110	171	199	231	242	139	130	118	192	172	136	203	167	136	158	270	342	336	284	216	263	178	216	159	129	70	147	97	136	121	80	124	223	329	169	260	166	185	174	296	173
RMER20B	74	58	58	51	50	85	36	51	63	45	52	83	107	50	41	49	114	93	53	62	77	69	54	90	76	109	94	69	59	41	35	53	53	21	60	33	74	33	19	73	58	138	95	115	71	119	81	102	540
RMER20C_Mm	40	32	9	21	25	34	27	37	18	31	36	34	37	19	15	28	50	72	25	38	20	35	15	42	43	42	22	29	31	38	16	35	21	15	23	9	34	19	14	23	37	57	34	51	44	50	35	78	93
RMER21A	82	119	80	89	106	67	96	124	88	157	117	124	179	94	155	117	164	185	119	200	229	167	189	305	215	242	143	157	148	125	109	123	126	108	79	86	283	120	124	162	221	309	235	372	178	430	349	308	122
RMER21B	20	18	14	12	30	29	9	15	12	27	21	32	25	8	13	20	37	32	15	15	19	15	9	31	28	26	9	11	12	14	18	12	8	7	16	11	22	8	18	6	16	21	19	16	14	21	30	36	36
RMER30	193	278	268	327	298	138	169	203	217	290	311	303	390	191	385	295	457	395	361	526	384	269	300	590	264	338	316	196	298	194	254	248	221	158	219	199	232	214	127	306	228	447	281	362	301	400	360	439	208
RMER3D-int	195	376	331	285	227	161	186	220	193	201	312	313	522	385	526	400	478	461	407	403	312	453	391	626	250	350	330	177	263	260	185	185	232	132	215	154	289	168	144	234	284	318	355	229	271	341	336	445	337
RMER4A	73	114	79	85	102	87	120	124	132	151	164	162	152	82	169	92	116	131	88	182	166	119	93	213	136	208	175	97	121	98	123	146	100	93	147	112	121	66	57	150	141	279	180	175	154	195	236	241	162
RMER4B	249	256	225	242	285	274	328	343	258	345	394	440	439	251	317	248	429	394	382	522	463	371	447	697	437	434	371	294	347	410	307	293	304	197	327	280	504	301	197	418	414	795	538	616	434	644	522	572	723
RMER5	505	665	567	653	673	496	697	647	459	654	657	1075	871	496	708	568	993	859	611	808	638	761	566	969	653	666	637	458	647	607	461	503	426	362	444	409	465	441	316	534	658	921	575	771	807	756	737	1025	797
RMER6-int	3	34	3	32	17	10	17	11	11	24	20	21	32	11	8	9	16	34	31	16	21	13	17	57	17	23	27	19	14	12	13	29	8	7	11	20	18	8	48	13	3	41	12	36	15	47	46	50	77
RMER6A	177	258	215	174	236	190	198	228	176	260	298	391	439	195	337	346	522	462	385	402	366	276	231	349	208	294	227	161	166	138	205	191	156	134	234	139	219	151	145	241	279	516	299	196	268	317	353	469	386
RMER6B	28	38	37	58	55	31	23	22	25	51	57	51	49	28	59	42	114	86	50	54	43	49	28	57	51	54	33	31	34	51	35	43	49	15	32	21	21	27	14	38	57	64	33	30	39	31	61	85	112
RMER6BA	86	120	85	82	104	93	85	80	58	110	127	226	120	98	118	113	136	115	259	194	198	101	118	160	89	110	75	55	95	102	127	90	84	35	106	55	67	42	58	128	173	339	288	80	148	151	122	175	69
RMER6C	93	72	55	57	60	64	60	41	54	84	105	150	155	31	144	109	164	222	145	86	119	91	112	148	75	89	90	60	84	74	53	73	39	42	77	46	110	59	40	60	214	180	151	132	78	96	164	278	225
RMER6D	18	25	29	18	32	17	41	17	29	29	52	22	17	25	48	18	60	87	35	19	79	9	37	47	17	55	25	20	11	23	24	9	14	11	9	5	23	7	9	10	36	39	51	37	34	32	18	51	123
RNERVK23-int	0	0	0	0	0	0	0	0	0	0	0	0	0	0	0	0	1	0	0	0	0	0	0	0	0	0	0	0	0	0	0	0	0	0	0	0	0	0	0	0	0	0	0	0	0	0	0	0	1
RNLTR23	0	0	0	0	0	1	0	0	0	0	0	0	0	0	0	0	0	0	0	0	0	1	0	0	0	0	0	0	0	0	0	0	0	0	0	0	0	0	0	0	0	0	0	0	0	0	0	0	0
RSINE1	16168	20155	15191	16681	15095	8722	12986	15345	11358	18177	20927	27241	26643	12643	20420	17575	22300	19799	17633	20493	15870	16536	12584	23697	15499	17891	13791	13083	16350	15838	15066	14950	13332	7581	14966	10559	12802	8884	7676	13416	13045	23190	15907	16515	14507	17796	17366	17974	10043
Ricksha	0	0	0	0	0	0	0	3	1	3	0	0	0	0	0	0	0	4	0	0	0	0	0	3	0	0	0	0	0	0	0	0	0	0	0	0	0	0	0	0	0	0	1	0	0	0	0	2	7
Ricksha_0	0	0	1	2	0	0	0	0	0	3	0	2	0	0	0	1	3	1	0	0	0	1	0	1	0	0	0	0	0	1	0	3	1	0	1	1	2	0	1	1	0	1	0	0	0	0	2	3	0
Ricksha_a	0	0	0	0	0	0	0	0	0	0	0	0	0	0	0	0	0	2	0	0	0	0	0	0	0	0	0	0	0	0	0	0	0	0	0	0	0	0	0	0	0	0	0	0	0	0	0	1	0
Ricksha_b	17	20	17	23	21	28	17	19	17	23	11	28	14	9	6	25	29	10	8	19	28	23	16	39	34	23	19	16	22	14	17	23	20	9	17	16	27	12	19	28	23	90	29	22	40	29	19	35	52
Ricksha_c	2	5	14	4	2	6	1	4	6	2	10	0	5	9	17	14	14	8	2	3	5	4	8	5	4	3	2	0	2	3	3	3	1	1	6	3	6	1	3	3	3	3	10	3	9	8	4	9	1
RodERV21-int	48	47	28	27	34	43	15	24	22	20	19	27	59	11	27	30	74	117	53	26	41	30	44	27	42	31	42	17	23	29	29	24	30	14	35	48	49	5	16	58	44	44	79	34	41	28	49	88	138
SRV_MM-int	60	80	127	51	53	47	86	102	74	95	110	99	159	51	137	158	139	145	223	126	178	105	77	224	78	94	77	35	57	73	54	63	75	44	89	65	80	37	74	106	73	125	70	86	121	144	92	105	112
SSU-rRNA_Hsa	3504	10648	3742	2691	2390	3596	3843	2930	3078	3965	2671	2073	3540	3174	2139	2288	2609	3690	1251	3521	4950	1871	2788	9666	8098	21828	16238	4182	6479	2617	2981	5295	5688	7332	8544	7572	4383	1943	4678	9822	13140	41309	41593	13985	10039	5799	14859	6977	2220
SUBTEL_sa	2	2	0	0	0	1	0	0	0	0	0	0	0	0	0	0	0	0	0	0	0	0	0	0	0	0	1	0	0	1	0	0	0	0	0	0	0	0	0	0	0	0	0	0	0	0	0	0	0
SYNREP_MM	0	0	0	0	0	31	0	0	0	0	0	0	0	0	0	1	19	103	1	0	0	0	0	6	0	0	0	0	0	3	0	0	0	0	0	0	0	0	0	0	1	4	6	0	1	0	0	94	0
T-rich	5569	7484	5795	5919	5339	3774	4864	6371	4966	7232	7604	8763	9747	4772	7269	6347	7552	6205	7415	8077	7368	6420	5169	10365	6593	9689	7550	4738	6523	6731	6076	7437	5567	4490	7960	5620	5340	3150	3437	6813	5134	11086	8516	8883	7291	9532	10292	9122	2726
Tigger1	50	56	43	42	30	39	42	45	35	35	54	49	64	25	85	46	69	62	52	53	64	73	60	78	79	88	100	63	43	67	27	40	43	25	51	52	67	41	30	89	49	121	89	87	26	84	88	134	53
Tigger10	113	144	68	91	51	35	74	105	59	88	108	160	227	132	101	67	145	107	127	79	46	56	58	171	67	122	81	29	73	80	40	68	59	31	60	31	79	39	19	43	53	77	45	24	87	77	74	119	162
Tigger11a	0	0	0	0	0	0	0	0	0	0	0	1	0	0	1	0	1	1	0	0	0	0	0	1	0	0	0	1	0	5	0	0	0	0	0	0	0	0	0	0	0	1	0	0	0	0	0	0	0
Tigger12	184	254	162	237	207	71	207	121	134	210	303	302	261	156	195	202	204	165	138	224	161	131	121	310	280	302	245	311	346	250	213	203	213	125	153	152	186	246	119	226	277	404	263	433	202	250	272	248	288
Tigger12A	0	0	0	0	0	0	1	0	0	0	0	0	0	0	0	1	2	1	1	5	0	0	0	0	0	1	0	0	0	0	0	0	0	0	0	0	0	0	0	0	0	0	0	0	2	0	0	2	4
Tigger12c	10	17	11	6	2	3	5	5	8	3	19	5	29	30	39	55	23	45	11	15	4	4	4	9	11	5	4	9	5	16	13	7	7	7	4	8	15	9	2	10	10	16	9	22	20	14	8	11	15
Tigger13a	4	17	6	2	9	7	4	0	6	17	3	12	11	10	6	6	20	16	5	5	3	7	2	15	1	2	11	3	8	2	9	8	11	3	2	6	3	0	1	1	8	5	2	21	9	5	9	25	9
Tigger14a	120	102	83	118	86	38	96	75	92	113	137	125	181	90	114	98	146	133	121	119	106	115	102	202	127	176	89	102	101	136	65	106	72	60	125	66	117	94	56	95	157	210	136	135	100	168	114	166	58
Tigger15a	161	232	180	181	151	115	148	190	179	179	159	264	260	111	179	100	179	198	167	265	225	226	151	378	183	250	170	105	161	139	170	200	187	105	177	116	184	101	77	133	124	241	146	155	169	263	292	166	93
Tigger16a	11	6	11	16	6	7	3	10	6	1	11	9	11	4	6	5	16	14	5	8	9	12	2	9	16	8	7	3	6	11	4	4	3	1	12	9	1	2	1	7	6	25	12	3	6	10	13	6	25
Tigger16b	39	61	29	50	46	21	31	54	30	39	42	34	72	21	12	22	42	16	26	40	32	35	18	58	36	34	32	20	21	30	28	32	35	25	25	19	24	16	13	18	35	61	38	32	27	32	25	26	31
Tigger17	27	17	18	9	15	8	9	27	20	17	9	10	29	4	24	24	9	24	8	20	30	11	13	21	17	8	14	12	5	3	18	24	26	7	38	33	8	12	6	24	17	57	10	21	27	34	18	13	34
Tigger17a	68	89	28	80	37	27	54	54	37	68	71	98	115	82	84	93	134	124	81	53	66	53	59	115	29	60	29	39	39	78	47	23	31	19	46	21	56	26	41	26	41	69	42	35	66	68	65	87	5
Tigger17b	0	0	0	0	0	0	0	0	0	0	0	0	0	0	0	0	3	1	36	0	0	0	1	0	0	0	0	0	0	0	0	0	0	0	0	0	1	0	0	0	0	0	0	0	0	2	0	2	2
Tigger17c	1	4	8	0	0	3	4	2	10	5	3	7	9	1	3	3	16	27	9	7	6	8	0	10	3	2	3	0	7	4	3	2	2	8	16	13	11	1	1	4	1	21	1	3	10	10	6	27	29
Tigger18a	6	1	5	4	1	23	0	2	0	3	6	6	2	1	0	2	8	10	2	3	0	4	1	2	4	6	4	3	2	4	1	2	0	1	5	1	0	0	1	4	1	6	3	1	5	1	6	14	10
Tigger19a	810	1012	922	948	728	445	616	928	590	736	959	1265	1636	850	1160	866	1217	1101	1118	1166	734	796	636	1376	819	1029	808	517	767	925	707	750	582	491	851	606	685	385	348	733	530	1061	855	695	880	1133	963	869	147
Tigger1a_Art	0	0	0	0	0	0	0	0	0	0	0	0	0	0	0	0	0	0	0	0	0	0	0	0	0	0	0	0	0	0	0	0	0	0	0	0	0	0	0	0	0	0	0	0	0	0	0	0	0
Tigger20a	5	9	7	6	1	7	1	9	19	25	11	9	17	15	15	5	5	12	8	12	15	10	5	12	9	18	16	6	8	13	13	7	12	1	10	5	8	1	7	16	5	8	25	6	7	19	13	8	7
Tigger2b	123	168	233	99	235	120	144	144	104	347	388	604	424	254	471	264	435	392	402	433	401	453	179	485	96	88	91	184	109	119	218	229	204	132	190	185	258	260	111	201	156	291	195	317	192	395	308	490	68
Tigger5	196	267	120	198	130	91	159	156	121	203	231	275	244	171	148	205	268	264	158	199	175	175	127	293	158	164	155	95	122	124	88	108	77	73	109	83	122	56	69	103	175	242	129	173	154	161	173	146	135
Tigger5b	91	109	63	69	68	56	78	104	89	101	120	149	150	67	121	80	113	134	116	146	164	100	120	150	115	145	95	80	96	86	95	76	79	62	97	62	93	61	58	109	106	210	127	141	166	165	165	205	179
Tigger6a	12	19	31	28	22	23	19	30	17	26	11	46	85	20	22	35	56	38	34	29	44	39	23	46	32	26	28	10	17	25	27	16	6	9	35	26	25	29	17	29	46	56	42	34	47	47	19	46	79
Tigger6b	6	8	15	9	10	3	2	5	7	9	7	8	14	5	11	5	16	17	19	16	4	11	3	13	9	9	20	7	5	12	4	1	1	0	10	0	20	1	9	6	2	46	7	27	6	22	9	18	0
Tigger7	384	342	304	319	260	201	238	268	190	323	397	426	685	373	365	529	762	563	683	495	376	341	313	558	230	252	205	161	235	254	174	254	222	106	252	130	176	187	125	314	202	433	289	282	299	422	399	466	125
Tigger8	0	0	0	0	0	1	0	0	0	5	2	1	0	0	4	0	4	4	5	12	1	1	0	0	0	0	3	2	0	0	6	0	0	1	1	0	0	0	0	2	0	0	2	1	2	3	1	6	6
Tigger9a	10	4	6	8	4	12	5	16	11	6	5	10	8	7	5	6	14	9	5	12	8	2	10	14	9	19	6	2	4	17	6	8	3	0	6	6	5	2	3	0	6	8	5	6	5	5	3	7	0
Tigger9b	3	3	7	0	4	3	2	3	0	7	3	1	1	0	3	0	25	14	14	7	7	3	0	2	7	5	9	3	0	1	7	10	0	2	3	3	0	1	1	1	11	5	0	10	6	3	6	10	31
U1	2	2	2	1	0	15	4	6	7	2	5	6	1	1	0	0	3	11	7	8	1	4	3	6	8	7	7	2	9	0	3	6	4	3	3	1	0	2	0	2	9	7	7	6	9	1	3	11	0
U13	0	2	0	1	0	0	0	0	1	3	4	4	5	2	0	0	1	0	0	1	0	0	0	0	6	2	4	1	4	1	0	2	0	0	0	0	1	0	0	2	3	9	1	4	0	3	0	1	0
U13_	0	0	0	0	0	0	1	0	0	1	0	0	3	0	0	0	1	1	0	2	0	0	0	0	0	0	0	0	0	0	0	0	0	2	0	0	0	0	0	0	0	0	0	1	1	0	0	1	0
U14	0	0	0	0	0	0	0	0	0	1	0	0	0	0	0	0	0	1	0	0	0	0	0	2	0	0	0	0	0	0	0	0	1	0	0	0	0	0	0	0	0	0	2	0	0	0	0	0	0
U17	0	0	0	2	0	0	2	1	2	2	1	6	1	1	0	3	1	0	3	5	5	16	3	21	23	14	4	1	14	10	5	6	2	8	16	9	65	14	12	36	21	8	45	60	0	22	10	42	0
U2	198	300	215	233	146	105	203	249	172	217	261	282	369	170	256	231	263	213	235	247	231	208	141	380	194	302	245	134	174	202	181	220	142	122	267	135	142	61	83	168	172	244	206	231	227	257	287	221	110
U3	5	0	2	1	9	6	5	3	3	5	9	11	2	0	0	0	6	2	1	6	3	10	7	3	9	20	2	15	23	41	19	12	40	7	17	15	2	11	1	8	47	9	1	11	8	16	1	3	0
U4	5	4	3	5	2	3	2	2	3	2	1	3	10	5	5	3	0	4	0	1	1	0	0	4	1	1	0	2	4	0	1	3	3	1	1	0	1	0	0	1	7	5	1	1	5	2	0	6	5
U5	124	82	81	44	50	22	24	45	28	62	76	79	138	39	84	124	124	80	122	74	51	72	30	89	40	75	59	41	37	62	37	53	55	32	53	32	23	31	17	24	56	53	39	52	51	37	48	45	86
U6	145	138	98	141	123	54	90	80	64	158	197	171	352	111	238	166	222	131	113	179	96	87	98	183	162	166	103	128	212	167	173	170	127	61	150	90	107	141	51	81	144	181	117	176	136	135	175	255	112
U7	1	0	0	0	0	1	0	0	0	1	3	0	0	0	0	0	1	2	0	0	0	1	0	0	2	2	0	0	0	0	0	0	1	0	1	0	0	0	0	0	3	1	1	1	0	0	0	2	0
U8	0	0	0	0	0	1	0	0	0	0	0	0	0	0	0	0	0	0	0	0	2	1	0	2	1	4	1	1	1	3	0	1	1	0	2	0	0	0	0	1	0	0	0	1	0	0	0	1	0
UCON1	0	0	0	0	0	0	0	0	0	0	0	0	0	0	0	0	0	0	0	0	0	0	0	0	0	0	0	0	0	0	0	0	0	0	0	0	0	0	0	0	1	0	0	0	0	0	0	0	0
UCON10	0	2	3	0	0	0	0	0	0	0	0	0	0	0	0	0	1	1	0	0	0	0	0	0	0	0	4	0	0	0	0	3	0	0	0	0	0	0	0	0	0	0	0	0	0	0	0	0	0
UCON11	0	0	0	0	0	1	0	0	0	0	0	0	0	0	0	0	0	0	0	0	0	0	0	0	0	0	0	0	0	0	0	0	0	0	0	0	0	0	0	0	0	0	0	0	0	0	0	0	0
UCON12	0	0	4	1	0	0	2	1	0	1	3	1	0	0	4	0	4	0	2	6	2	0	0	1	1	14	1	0	0	1	0	0	0	1	5	14	0	2	2	0	0	5	5	10	0	2	1	2	0
UCON12A	0	0	0	0	0	0	0	0	0	0	0	0	0	0	0	1	0	0	0	0	0	0	0	0	0	0	0	0	0	0	0	0	0	0	0	0	0	0	0	0	0	0	0	0	0	0	0	0	0
UCON13	0	0	0	1	0	7	0	0	0	0	0	0	0	0	0	0	5	0	0	0	0	0	0	0	0	0	0	0	0	0	0	1	0	0	0	0	0	0	0	0	0	0	0	0	0	1	0	3	0
UCON14	6	9	0	6	1	7	8	3	4	8	7	2	10	2	1	5	2	2	4	3	10	8	7	23	16	22	12	4	13	1	18	10	7	0	7	7	4	7	5	4	16	17	16	6	19	1	11	9	56
UCON15	0	0	4	0	0	0	0	0	0	0	0	0	2	0	1	1	0	1	1	0	0	0	0	0	0	0	0	0	0	0	4	0	0	0	0	0	0	0	0	0	0	0	0	0	0	0	1	0	0
UCON16	0	0	0	0	0	0	0	0	0	0	0	0	0	0	0	0	0	0	0	0	0	0	0	0	0	0	0	0	0	0	0	0	0	0	0	0	0	0	0	0	0	0	0	0	0	0	0	1	0
UCON17	0	0	0	0	0	0	0	0	0	0	0	0	0	0	0	0	0	0	0	0	0	0	0	0	0	0	0	0	0	0	0	0	0	0	0	0	0	0	0	0	0	0	0	0	0	0	1	0	0
UCON18	0	0	0	0	0	0	0	0	0	0	1	0	0	0	0	0	0	1	0	0	0	0	0	0	0	0	0	0	0	0	0	0	0	0	0	0	0	0	0	0	0	0	0	0	0	0	0	0	0
UCON19	0	0	0	0	0	0	0	0	0	0	0	0	0	0	0	0	0	1	3	0	0	0	0	0	0	0	0	0	0	0	0	0	0	0	0	0	0	0	0	0	0	0	0	0	0	0	1	7	9
UCON2	212	288	169	174	121	68	173	156	102	184	443	360	325	191	228	180	254	284	194	414	121	236	197	265	283	199	211	230	250	525	476	283	229	165	172	136	232	182	116	195	187	289	215	366	303	345	354	297	71
UCON20	0	0	2	0	0	0	0	0	0	0	0	0	0	0	0	0	1	0	0	0	0	0	0	3	0	1	0	0	0	0	0	0	0	3	0	0	0	0	0	0	0	4	0	0	2	0	0	4	0
UCON21	0	0	0	0	0	0	0	0	0	1	0	0	0	0	0	0	0	0	0	0	0	0	0	0	0	0	0	0	0	0	0	0	0	0	0	0	1	0	0	0	1	0	0	0	0	0	0	0	0
UCON22	0	0	0	0	1	0	0	0	0	0	0	0	0	0	0	0	0	0	0	0	0	0	0	0	0	0	0	0	0	0	0	0	0	0	0	0	0	0	0	0	0	0	0	0	0	0	0	1	0
UCON23	12	32	19	13	23	16	27	32	12	32	39	43	37	8	33	30	27	18	19	38	29	24	28	53	34	24	26	19	35	24	31	18	26	14	19	16	34	19	20	24	38	32	22	53	28	28	23	42	9
UCON24	0	0	0	0	0	0	0	0	0	0	0	0	0	0	0	0	0	0	0	0	0	0	0	0	0	0	0	0	0	0	0	0	0	0	0	0	0	0	0	0	0	0	0	0	0	0	0	1	0
UCON25	0	0	0	0	2	0	0	0	0	0	0	0	0	0	0	2	1	0	0	0	0	0	0	0	0	0	0	1	0	0	0	0	0	0	0	0	0	0	0	0	0	1	1	0	0	0	0	0	0
UCON26	16	2	6	6	12	7	12	12	3	11	14	27	38	11	9	24	25	10	22	34	9	20	4	20	3	11	5	8	1	11	1	8	11	1	5	4	3	3	11	2	6	15	16	9	5	2	25	13	2
UCON27	0	1	0	2	0	1	0	0	1	3	4	6	0	4	0	1	6	3	2	5	0	4	0	4	0	0	0	0	0	1	0	0	0	0	1	0	0	0	0	2	2	3	1	3	0	1	0	3	0
UCON28a	3	0	4	5	3	2	10	5	5	5	4	3	2	3	6	3	3	8	2	3	2	1	1	7	6	5	6	6	2	4	0	2	0	3	3	4	0	4	2	1	7	4	0	5	7	3	7	7	0
UCON28b	0	0	0	0	2	2	0	0	0	1	0	0	0	0	1	0	1	0	5	0	3	9	2	1	0	0	3	0	1	1	0	0	0	0	0	0	0	0	0	4	0	0	0	0	7	0	2	8	14
UCON28c	0	0	1	0	0	0	1	0	0	0	0	1	1	0	0	1	0	0	0	1	0	0	0	0	0	0	0	0	0	0	1	0	0	0	0	0	0	0	0	0	0	1	0	1	0	1	0	0	0
UCON29	40	35	39	39	26	11	17	28	18	34	64	60	72	36	46	36	46	54	40	65	27	43	29	58	15	22	15	11	22	26	24	29	23	6	10	6	6	21	4	18	19	19	30	28	28	31	48	36	4
UCON31	15	14	5	10	24	4	20	10	5	10	13	17	20	13	12	5	16	8	11	19	11	13	19	27	14	17	15	17	21	26	15	12	12	4	13	3	15	14	4	13	23	21	9	22	13	11	13	22	9
UCON4	86	82	37	78	101	43	106	83	59	134	160	143	113	64	95	72	128	62	71	148	61	104	98	172	130	100	94	123	136	118	121	81	68	48	49	30	68	72	30	57	116	111	95	170	112	92	82	86	23
UCON5	0	0	0	0	0	0	1	0	0	0	0	0	0	0	0	0	1	0	0	0	0	0	0	0	0	0	0	0	0	0	0	0	0	0	0	0	1	0	0	0	0	0	1	0	0	1	0	0	0
UCON6	0	2	0	2	2	0	0	0	2	0	1	0	2	0	0	0	0	2	2	2	0	0	0	0	0	1	0	0	2	0	2	0	2	0	0	1	0	1	0	0	4	0	0	0	3	1	1	1	6
UCON7	6	14	21	19	27	12	31	24	17	44	36	34	55	30	24	38	33	61	54	63	56	45	37	51	15	8	4	19	4	31	10	25	10	9	14	9	31	15	13	29	15	18	29	19	24	23	33	66	0
UCON8	3	3	13	4	2	7	1	0	1	0	4	2	2	2	5	4	2	9	5	2	9	2	6	1	3	0	3	2	0	5	4	0	0	0	0	1	4	2	0	1	2	1	0	3	0	1	3	2	0
UCON9	0	0	0	0	0	0	0	0	0	0	0	0	0	0	0	1	0	1	0	0	0	0	4	0	0	0	0	0	2	0	0	0	0	0	0	0	0	0	0	0	0	2	0	0	0	0	0	0	0
URR1A	1474	1524	1541	1329	1222	718	884	1250	991	1336	1663	1995	2747	1670	1927	1587	2339	2087	2076	1816	1563	1682	1328	2346	887	1200	910	696	923	1094	825	881	797	553	965	625	1092	567	622	1085	967	1693	1144	1048	1396	1602	1665	1802	1413
URR1B	2028	2558	1788	2219	2400	1369	1965	2271	1738	2812	2784	3574	3354	1962	2503	2172	3016	2733	2192	3375	2447	2238	1916	4435	2537	2785	2365	2017	2511	2307	2435	2267	2085	1215	2346	1579	2245	1581	1122	2102	2163	3399	2494	2666	2689	2662	2799	3027	1344
X1_LINE	0	0	0	0	0	0	0	0	0	0	0	0	0	0	3	0	0	1	0	0	0	0	0	0	0	0	2	0	0	0	0	0	0	0	0	0	0	0	0	0	0	0	0	1	0	0	0	1	0
X2_LINE	0	0	0	0	0	0	0	0	0	0	0	0	0	0	0	0	0	1	0	0	0	0	0	0	0	0	0	0	0	0	0	0	0	0	0	0	0	0	0	0	0	1	0	1	0	0	0	0	0
X3_LINE	97	128	76	104	61	46	92	69	82	84	115	141	144	74	130	99	134	116	94	101	104	94	113	170	143	108	133	111	123	80	87	79	77	59	76	77	92	64	52	80	163	154	99	137	85	121	129	138	65
X5A_LINE	0	0	0	0	0	0	0	1	0	0	0	1	0	0	0	0	1	1	0	1	0	2	0	0	0	0	0	0	0	0	0	0	0	0	1	0	1	0	0	0	0	1	0	0	0	0	0	1	1
X5B_LINE	0	0	0	3	0	4	0	0	0	0	0	0	0	0	0	1	1	1	0	3	0	2	0	0	1	0	0	0	0	1	0	0	0	0	0	0	0	0	0	0	1	6	1	0	1	1	1	4	3
X6A_LINE	8	7	12	8	19	13	18	12	10	11	19	22	11	13	8	18	12	12	27	24	13	6	5	31	15	18	9	16	8	14	16	11	18	8	13	13	11	6	5	17	17	18	6	13	9	12	25	23	80
X6B_LINE	610	596	295	459	351	299	430	504	349	457	612	699	581	245	461	429	502	331	412	478	441	437	350	813	742	841	726	639	729	556	512	599	423	368	474	405	534	398	229	435	561	940	544	719	460	613	492	667	617
X7A_LINE	43	22	38	18	62	32	39	29	20	64	58	134	66	38	64	52	68	71	88	60	42	85	56	76	18	12	3	24	13	37	41	43	39	12	34	24	38	35	19	18	27	27	39	34	23	18	16	57	0
X7B_LINE	98	96	82	117	80	20	69	65	50	97	120	142	247	152	177	128	206	138	139	135	69	99	111	172	61	51	72	37	62	70	88	42	48	41	52	30	68	32	29	61	62	122	70	49	80	69	86	103	59
X7C_LINE	3	0	0	0	1	6	0	0	0	1	3	1	0	1	4	1	2	4	1	0	1	1	0	0	4	11	3	3	1	3	0	3	0	0	1	0	5	1	0	2	2	10	1	2	0	0	1	3	194
X7D_LINE	0	0	0	0	0	0	0	0	0	1	0	0	0	0	0	0	0	2	0	0	0	0	0	0	0	0	0	0	0	0	0	0	0	0	0	0	0	0	0	0	0	0	0	0	0	0	0	0	0
X8_LINE	9	9	9	3	8	4	5	8	4	10	5	6	7	2	18	6	12	12	32	14	19	4	8	13	8	16	5	2	8	13	9	4	2	8	9	13	3	6	5	10	6	12	14	6	11	9	21	22	6
X9_LINE	3	12	9	7	6	5	5	2	6	7	7	2	11	8	8	15	10	15	21	9	7	8	5	13	5	15	6	1	2	9	6	18	7	6	15	7	2	0	6	22	5	23	11	16	2	27	10	19	4
YREP_Mm	166	186	153	107	133	82	92	156	108	127	193	196	285	159	230	184	227	157	212	191	123	273	163	302	132	164	130	97	110	139	131	138	128	108	103	126	137	147	73	96	80	167	140	155	121	209	177	314	131
ZP3AR	557	481	286	531	475	232	505	365	277	547	560	646	700	386	644	505	749	539	479	700	435	427	543	988	542	382	411	358	530	392	517	392	364	166	277	205	511	434	171	286	346	494	440	537	340	384	374	589	164
Zaphod	13	22	28	22	20	11	11	18	14	21	19	21	78	4	20	16	46	39	37	26	31	25	12	19	6	20	9	11	5	12	10	17	26	11	8	9	9	8	11	22	20	33	24	21	25	26	36	36	9
Zaphod2	3	49	20	20	9	8	6	5	15	7	34	53	119	21	21	20	54	21	30	13	19	3	9	28	8	27	12	14	11	24	15	28	11	0	36	6	9	5	12	20	3	16	15	19	15	9	32	60	100
Zaphod3	1	3	0	2	4	1	3	1	5	1	3	0	6	7	2	3	9	25	1	8	5	0	9	8	4	7	0	2	1	1	1	6	1	0	3	4	0	1	1	0	2	18	1	2	3	4	10	8	14
hAT-N1_Mam	5	6	3	1	2	2	3	4	3	11	6	2	6	1	0	4	5	8	4	5	4	1	2	2	10	5	4	2	4	1	4	1	5	5	4	1	2	3	0	3	3	10	4	4	11	2	2	9	10
polypurine	129	168	146	165	114	81	132	216	128	182	158	313	220	105	183	147	141	153	144	152	196	161	139	237	226	206	203	176	173	110	187	134	134	88	122	103	210	121	113	189	224	319	228	204	223	270	160	220	139
polypyrimidine	239	384	231	336	419	205	292	295	248	373	523	510	309	301	459	265	293	401	340	495	339	371	384	657	364	415	325	414	539	306	417	263	290	220	269	216	359	362	136	200	322	487	293	399	283	409	269	613	725
tRNA-Ala-GCA	159	170	112	105	125	96	108	184	96	157	181	227	173	99	133	120	150	108	104	146	149	137	99	216	137	196	143	105	118	112	129	132	97	92	204	101	91	67	81	134	92	183	174	113	191	178	204	151	39
tRNA-Ala-GCG	1	1	12	5	4	1	2	0	0	3	4	4	1	1	0	6	14	3	0	0	7	5	1	7	4	1	2	3	3	1	2	1	2	1	7	2	1	2	0	6	3	3	2	3	2	4	2	5	1
tRNA-Ala-GCY	0	0	0	0	0	0	0	0	0	0	0	0	0	0	0	0	0	0	0	0	0	0	0	0	0	0	0	0	0	0	0	0	0	0	0	0	0	0	0	0	2	0	0	0	0	0	0	2	0
tRNA-Ala-GCY_	69	167	107	111	104	91	101	110	87	137	159	153	158	89	134	116	154	126	128	176	140	164	115	179	126	162	109	89	120	121	100	109	115	57	115	73	112	70	62	109	96	211	120	130	101	143	202	185	88
tRNA-Arg-AGA	0	0	0	1	0	1	0	0	0	0	0	0	0	0	0	0	1	0	0	0	0	0	0	0	0	0	0	0	0	0	0	0	0	0	0	0	0	0	0	1	1	0	2	0	0	0	0	0	0
tRNA-Arg-AGG	0	0	0	0	0	0	0	0	0	0	0	0	0	0	0	0	0	0	0	0	0	0	0	0	0	0	0	0	0	0	0	0	0	0	0	0	0	0	0	0	7	0	0	0	0	0	0	0	0
tRNA-Arg-CGA	0	0	0	0	0	0	0	0	0	0	0	0	0	0	0	0	1	0	0	0	0	0	0	0	0	0	0	0	0	0	0	0	0	0	0	0	0	0	0	0	0	0	0	0	0	0	0	0	0
tRNA-Arg-CGA_	0	0	0	0	0	0	0	0	0	0	0	0	0	0	0	0	0	0	0	0	0	0	0	0	0	0	0	0	0	0	0	0	0	0	0	0	0	0	0	0	0	0	0	0	0	0	0	0	0
tRNA-Arg-CGG	0	0	0	0	0	0	0	0	0	0	0	0	0	0	0	0	1	1	0	0	0	0	0	0	0	0	0	1	0	0	0	0	0	0	0	0	0	0	0	0	0	0	0	0	0	0	0	1	0
tRNA-Arg-CGY_	0	0	0	0	0	0	0	0	0	0	0	0	0	0	0	0	2	1	0	0	0	0	0	0	0	0	0	0	0	0	0	0	0	0	0	0	0	0	0	0	0	0	1	0	1	0	0	0	0
tRNA-Asn-AAC	0	0	0	0	0	0	0	0	0	0	0	0	0	0	0	0	0	0	0	0	0	0	0	0	0	0	0	0	0	0	0	0	0	0	0	0	0	0	0	0	11	0	0	0	7	0	0	0	0
tRNA-Asp-GAY	0	0	0	0	0	0	0	0	0	0	0	0	0	0	0	0	0	0	0	0	0	0	0	0	0	0	0	0	0	0	0	0	0	0	0	0	0	0	0	0	0	0	0	0	0	0	0	2	0
tRNA-Cys-TGY	0	0	0	0	0	3	0	0	0	0	0	0	0	0	0	0	6	3	0	2	0	0	0	0	0	0	0	0	0	0	0	0	0	0	0	0	0	0	0	0	2	0	0	0	0	0	0	4	0
tRNA-Gln-CAA	0	0	0	0	0	0	0	0	0	0	0	0	0	0	0	0	0	2	0	0	0	0	0	0	0	0	0	0	0	0	0	0	0	0	0	0	0	0	0	0	0	0	0	0	0	0	0	0	0
tRNA-Gln-CAA_	101	43	54	94	12	923	16	38	25	86	40	37	156	44	66	98	490	130	58	87	22	31	66	158	65	69	39	26	65	100	31	74	29	40	58	41	22	26	27	47	62	49	56	45	72	92	44	60	41
tRNA-Gln-CAG	0	0	0	0	0	0	0	0	0	0	0	0	0	0	0	0	1	1	0	0	0	0	0	0	0	0	0	0	0	0	0	0	0	0	0	0	0	0	0	0	0	0	0	0	0	0	0	0	0
tRNA-Glu-GAA	0	0	0	0	0	0	0	0	0	0	0	0	0	0	0	0	0	0	0	0	0	0	0	0	0	0	0	0	0	0	0	0	0	0	0	0	0	0	0	0	1	0	0	0	0	0	0	0	0
tRNA-Glu-GAG	0	0	0	0	0	0	0	0	0	0	0	0	0	0	0	0	1	0	0	0	0	0	0	0	0	0	0	0	0	0	0	0	0	0	0	0	0	0	0	0	0	0	0	0	0	0	0	0	0
tRNA-Glu-GAG_	0	0	0	0	0	1	0	0	0	0	0	0	0	0	1	1	0	0	0	0	0	0	0	0	0	0	0	0	0	0	0	0	0	0	0	0	0	0	0	0	1	0	0	0	1	0	0	0	0
tRNA-Gly-GGA	4	15	11	8	6	4	11	9	14	10	18	22	3	5	17	13	20	4	4	17	18	13	7	17	9	2	11	8	8	7	7	13	8	6	6	14	9	10	11	9	7	17	15	14	13	24	17	11	0
tRNA-Gly-GGG	0	0	0	0	0	0	0	0	2	0	0	0	0	0	2	1	0	0	5	0	0	0	0	0	0	0	0	0	0	0	0	0	0	0	0	0	0	0	0	0	0	0	0	0	0	0	0	0	0
tRNA-Gly-GGY	0	0	0	0	1	0	0	1	0	3	0	0	0	0	0	2	1	1	0	1	0	0	0	0	0	0	0	0	0	0	0	2	0	0	1	0	0	0	1	0	0	0	0	0	0	0	0	1	0
tRNA-His-CAY_	0	1	0	0	0	1	0	0	0	0	0	0	0	0	0	0	7	4	0	0	0	0	0	0	0	0	0	0	0	0	0	0	0	0	0	0	0	0	0	0	1	2	0	0	0	0	0	0	0
tRNA-Ile-ATA	0	0	0	0	0	0	0	0	0	0	0	0	0	0	0	0	0	0	0	0	0	0	0	0	0	0	0	0	0	0	0	0	0	0	0	0	0	0	0	0	0	0	1	0	0	0	0	0	0
tRNA-Ile-ATT	0	0	0	0	0	0	0	0	0	0	0	0	0	0	0	0	0	2	0	0	0	0	0	0	0	0	0	0	0	0	0	0	0	0	0	0	0	0	0	0	1	0	1	0	0	0	0	0	0
tRNA-Leu-CTA	0	0	0	0	0	0	0	1	0	0	0	0	0	0	0	0	0	1	0	0	0	0	0	0	0	0	0	0	0	0	0	0	0	0	0	0	0	0	0	0	0	0	0	0	0	0	0	0	0
tRNA-Leu-CTA_	0	0	0	0	0	0	0	0	0	0	0	0	0	0	0	0	1	0	0	0	0	0	0	0	0	0	0	0	0	0	0	0	0	0	0	0	0	0	0	0	0	0	0	0	0	0	0	0	0
tRNA-Leu-CTY	0	0	0	1	0	0	1	0	0	0	0	2	0	0	0	0	1	0	0	0	0	0	0	0	0	0	0	0	0	0	0	0	0	0	0	0	0	0	0	0	1	0	0	0	0	0	0	0	0
tRNA-Leu-TTA	0	0	0	0	0	0	0	0	0	0	0	0	0	0	0	0	0	0	0	0	0	0	0	0	0	0	0	0	0	0	0	0	0	0	0	0	0	0	0	0	0	0	0	0	0	0	0	0	0
tRNA-Leu-TTA(m)	760	469	382	602	108	1209	97	376	162	390	200	203	1367	276	459	844	1584	350	487	459	107	227	589	948	250	300	213	105	238	200	123	230	132	94	212	162	293	119	212	242	243	218	267	233	313	473	327	337	444
tRNA-Leu-TTG	0	0	0	0	0	0	0	0	0	0	0	0	0	0	0	0	0	0	0	0	0	0	0	0	0	0	0	0	0	0	0	0	0	0	0	0	0	0	0	0	0	0	0	0	1	0	0	4	0
tRNA-Lys-AAA	0	0	0	0	0	1	0	0	0	0	0	0	0	0	0	0	1	2	0	0	0	0	0	0	0	0	0	0	0	0	0	0	0	0	0	0	0	0	0	0	0	0	1	0	0	0	0	1	0
tRNA-Lys-AAG	9	12	9	26	9	4	7	19	11	11	14	10	33	6	8	9	15	15	7	20	7	4	2	14	10	11	14	11	31	14	6	13	7	12	18	5	2	4	2	9	13	23	7	6	14	4	15	16	11
tRNA-Met-i	0	0	0	0	0	0	0	0	0	0	0	0	0	0	0	0	4	3	0	0	0	0	0	0	0	0	0	0	0	0	0	0	0	0	0	0	0	0	0	0	0	1	0	0	0	0	0	1	0
tRNA-Phe-TTY	0	0	0	0	0	1	0	0	0	0	0	0	0	0	0	0	3	1	0	0	0	0	0	0	0	0	0	0	0	0	0	0	0	0	0	0	0	0	0	0	0	0	0	0	0	0	0	0	0
tRNA-Pro-CCA	0	0	0	0	0	0	0	0	0	0	0	0	0	1	0	0	0	0	0	0	0	0	0	0	0	0	0	0	0	0	0	0	0	0	0	0	0	0	0	0	0	0	0	0	0	0	0	0	0
tRNA-Pro-CCG	0	0	0	0	0	0	0	0	0	0	0	0	0	0	0	0	0	0	0	0	0	0	0	0	0	0	0	0	0	0	0	0	0	0	0	0	0	0	0	0	0	0	0	0	0	0	0	0	0
tRNA-Pro-CCY	3	3	1	2	0	0	2	0	0	1	1	0	2	0	0	1	3	0	0	1	1	0	0	3	2	1	3	0	1	0	1	0	1	1	0	1	2	3	1	0	0	0	0	0	1	0	3	0	0
tRNA-Ser-AGY	0	0	0	0	0	0	0	0	0	0	0	0	0	0	0	0	1	2	0	0	0	0	0	1	0	0	0	0	0	0	0	0	0	0	0	0	0	0	0	0	3	2	0	0	0	0	0	1	0
tRNA-Ser-TCA(m)	3452	1499	768	2340	913	1209	869	3133	1265	2429	1201	888	4496	801	1695	2355	2941	916	1247	2420	571	1390	2416	5817	2820	2668	2612	1836	3470	1899	2323	3522	1016	1371	2356	1729	2188	1241	1572	1955	1694	2908	3678	3676	2655	2391	2081	2040	2163
tRNA-Ser-TCG	0	0	0	0	0	0	0	0	0	0	0	0	0	0	0	0	0	1	0	0	0	0	0	0	0	0	0	0	0	0	0	0	0	0	0	0	0	0	0	0	0	0	0	0	0	0	0	0	0
tRNA-Ser-TCY	0	0	0	0	0	0	0	0	0	0	0	0	0	0	0	1	1	0	0	0	0	0	0	0	0	0	0	0	0	0	0	0	0	0	0	0	0	0	0	0	3	0	0	0	2	0	0	0	0
tRNA-Thr-ACA	0	0	0	0	0	0	0	0	0	0	0	0	0	0	0	0	1	0	0	0	0	0	3	0	0	0	0	0	0	0	0	0	0	0	0	0	0	0	0	0	0	0	0	0	0	0	0	0	0
tRNA-Thr-ACG	0	0	0	0	0	0	0	0	0	0	0	0	0	0	0	0	1	1	0	0	0	0	0	0	0	0	0	0	0	0	0	0	0	0	0	0	0	0	0	0	0	0	0	0	0	0	0	0	0
tRNA-Thr-ACG_	0	0	0	0	0	0	0	0	0	0	0	0	0	0	0	0	0	0	0	0	0	0	0	0	0	0	0	0	0	0	0	0	0	0	0	0	0	0	0	0	0	0	0	0	0	0	0	0	0
tRNA-Thr-ACY	0	3	0	0	0	0	0	0	0	0	0	0	0	0	0	0	0	0	1	0	0	0	0	0	0	0	0	0	0	0	0	0	0	0	0	0	0	0	0	0	0	0	0	0	0	0	0	0	0
tRNA-Thr-ACY_	1	0	0	0	0	0	0	0	0	0	0	0	0	0	0	0	1	1	0	0	0	0	0	0	0	0	0	0	0	0	0	0	0	0	0	0	0	0	0	0	0	0	0	0	0	0	0	0	0
tRNA-Trp-TGG	0	0	0	0	0	1	0	0	0	0	0	0	0	1	1	0	2	4	0	1	1	0	0	0	0	3	0	0	0	1	0	0	0	0	0	0	0	0	0	0	0	2	2	0	0	0	0	2	0
tRNA-Tyr-TAC	1	5	0	0	0	0	0	0	1	0	0	0	0	0	0	0	1	2	0	0	0	0	0	0	0	0	0	0	0	0	0	0	0	0	0	0	0	0	0	0	1	7	1	0	0	0	0	0	0
tRNA-Tyr-TAT	0	0	0	0	0	0	0	0	0	0	0	0	0	0	0	0	0	0	0	0	0	0	0	0	0	0	0	0	0	0	0	0	0	0	0	0	0	0	0	0	0	0	1	0	0	0	0	0	0
tRNA-Val-GTA	0	0	0	0	0	0	0	0	0	0	0	0	0	0	0	1	1	0	0	0	0	0	0	0	0	0	0	0	0	0	0	1	0	0	0	0	0	0	0	0	0	0	0	0	0	0	0	0	0
tRNA-Val-GTG	0	0	0	0	0	0	0	0	0	1	0	0	0	0	0	0	4	0	0	0	0	0	1	2	0	0	0	0	0	1	0	0	0	0	0	0	0	0	0	1	1	0	0	0	0	0	0	1	0
tRNA-Val-GTY	0	0	0	0	0	0	0	0	0	0	0	0	0	1	0	0	1	1	0	0	0	0	0	0	0	0	0	0	0	0	0	0	0	0	0	0	0	0	0	0	0	0	0	0	0	0	0	1	0
[truncated: 17 more columns]
