# Supplementary material for: Stella modulates transcriptional and endogenous retrovirus programs during maternal-to-zygotic transition
Source: eLife journal article supplement (doi:10.7554/elife.22345), 2017-03-21
Supplement: supp [file elife-22345-supp-v1.zip › elife_poa_e22345_Supplementary_File_1.xlsx]

## Sheet: Sample details
Sample name	Genotyping	Embryo stage	Experimental batch
WTO1	Wildtype	Oocyte	Batch 1
WTO2	Wildtype	Oocyte	Batch 1
WTO3	Wildtype	Oocyte	Batch 1
WTO4	Wildtype	Oocyte	Batch 1
WTO5	Wildtype	Oocyte	Batch 2
WTO6	Wildtype	Oocyte	Batch 2
WTO7	Wildtype	Oocyte	Batch 2
WTO8	Wildtype	Oocyte	Batch 2
WTO9	Wildtype	Oocyte	Batch 2
WTO10	Wildtype	Oocyte	Batch 2
WTO11	Wildtype	Oocyte	Batch 2
WTO12	Wildtype	Oocyte	Batch 2
STKO1	Stella knockout	Oocyte	Batch 1
STKO2	Stella knockout	Oocyte	Batch 1
STKO3	Stella knockout	Oocyte	Batch 1
STKO4	Stella knockout	Oocyte	Batch 1
STKO5	Stella knockout	Oocyte	Batch 1
STKO6	Stella knockout	Oocyte	Batch 1
STKO7	Stella knockout	Oocyte	Batch 1
STKO8	Stella knockout	Oocyte	Batch 2
STKO9	Stella knockout	Oocyte	Batch 2
STKO10	Stella knockout	Oocyte	Batch 2
STKO11	Stella knockout	Oocyte	Batch 2
STKO12	Stella knockout	Oocyte	Batch 2
WTC1	Wildtype	1-cell	Batch 4
WTC2	Wildtype	1-cell	Batch 4
WTC3	Wildtype	1-cell	Batch 4
WTC4	Wildtype	1-cell	Batch 4
WTC5	Wildtype	1-cell	Batch 4
WTC6	Wildtype	1-cell	Batch 3
WTC7	Wildtype	1-cell	Batch 3
WTC8	Wildtype	1-cell	Batch 3
WTC9	Wildtype	1-cell	Batch 3
WTC10	Wildtype	1-cell	Batch 3
WTC11	Wildtype	1-cell	Batch 3
WTC12	Wildtype	1-cell	Batch 3
STKC1	Stella maternal/zygotic knockout	1-cell	Batch 4
STKC2	Stella maternal/zygotic knockout	1-cell	Batch 4
STKC3	Stella maternal/zygotic knockout	1-cell	Batch 4
STKC4	Stella maternal/zygotic knockout	1-cell	Batch 4
STKC5	Stella maternal/zygotic knockout	1-cell	Batch 4
STKC6	Stella maternal/zygotic knockout	1-cell	Batch 4
STKC7	Stella maternal/zygotic knockout	1-cell	Batch 4
STKC8	Stella maternal/zygotic knockout	1-cell	Batch 4
STKC9	Stella maternal/zygotic knockout	1-cell	Batch 3
STKC10	Stella maternal/zygotic knockout	1-cell	Batch 3
STKC11	Stella maternal/zygotic knockout	1-cell	Batch 3
STKC12	Stella maternal/zygotic knockout	1-cell	Batch 3
WT1	Wildtype	2-cell	Batch 7
WT2	Wildtype	2-cell	Batch 5
WT3	Wildtype	2-cell	Batch 5
WT4	Wildtype	2-cell	Batch 5
WT5	Wildtype	2-cell	Batch 5
WT6	Wildtype	2-cell	Batch 5
WT7	Wildtype	2-cell	Batch 5
WT8	Wildtype	2-cell	Batch 5
WT9	Wildtype	2-cell	Batch 5
STKO1	Stella maternal/zygotic knockout	2-cell	Batch 7
STKO2	Stella maternal/zygotic knockout	2-cell	Batch 6
STKO3	Stella maternal/zygotic knockout	2-cell	Batch 6
STKO4	Stella maternal/zygotic knockout	2-cell	Batch 6
STKO5	Stella maternal/zygotic knockout	2-cell	Batch 6
STKO6	Stella maternal/zygotic knockout	2-cell	Batch 5
STKO7	Stella maternal/zygotic knockout	2-cell	Batch 5
STKO8	Stella maternal/zygotic knockout	2-cell	Batch 5
STKO9	Stella maternal/zygotic knockout	2-cell	Batch 5
