# Supplementary material for: Stella modulates transcriptional and endogenous retrovirus programs during maternal-to-zygotic transition
Source: eLife journal article supplement (doi:10.7554/elife.22345), 2017-03-21
Supplement: supp [file elife-22345-supp-v1.zip › elife_poa_e22345_Supplementary_File_2.xlsx]

## Sheet: peakAnnot
Chr	Start	End	Strand	Peak Score	Focus Ratio/Region Size	Annotation	Detailed Annotation	Distance to TSS	Nearest PromoterID	Nearest Ensembl	Gene Name	Gene Type
chr17	34911967	34912143	+	121.2	0.751	intron (NM_145830, intron 24 of 26)	intron (NM_145830, intron 24 of 26)	-2411	NM_023557	ENSMUSG00000007034	Slc44a4	protein-coding
chrX	106186855	106187031	+	54	0.687	promoter-TSS (NM_008828)	promoter-TSS (NM_008828)	-157	NM_008828	ENSMUSG00000062070	Pgk1	protein-coding
chr14	63241021	63241197	+	30	0.825	exon (NM_008092, exon 2 of 7)	exon (NM_008092, exon 2 of 7)	4162	NM_008092	ENSMUSG00000021944	Gata4	protein-coding
chr8	19784704	19784880	+	28.8	0.714	intron (NM_001270553, intron 6 of 9)	CpG	55216	NM_001039553		4930467E23Rik	protein-coding
chr10	44391559	44391735	+	27.6	0.556	Intergenic	MLTR14|LTR|ERV1	31971	NR_035450	ENSMUSG00000089260	Mir1929	ncRNA
chr17	13305996	13306172	+	27.6	0.641	Intergenic	(CTGTG)n|Simple_repeat|Simple_repeat	-48488	NM_001167578	ENSMUSG00000052469	Tcp10c	protein-coding
chr14	63200332	63200508	+	26.4	0.88	exon (NM_008092, exon 7 of 7)	exon (NM_008092, exon 7 of 7)	-6895	NM_201610	ENSMUSG00000035121	Neil2	protein-coding
chrX	106203802	106203978	+	24	0.719	TTS (NM_008828)	TTS (NM_008828)	15952	NM_001001176	ENSMUSG00000047242	Taf9b	protein-coding
chr5	26070451	26070627	+	20.4	0.667	Intergenic	Intergenic	18725	NM_001177579	ENSMUSG00000073116	Gm10471	protein-coding
chr6	4924008	4924184	+	19.2	0.692	intron (NM_181595, intron 2 of 15)	(CCCTAA)n|Simple_repeat|Simple_repeat	20776	NM_181595	ENSMUSG00000032827	Ppp1r9a	protein-coding
chr4	146480839	146481015	+	19.2	0.81	Intergenic	Intergenic	-21073	NM_001243138	ENSMUSG00000056300	Gm13247	protein-coding
chr1	171530967	171531143	+	18	0.882	exon (NM_010584, exon 5 of 8)	exon (NM_010584, exon 5 of 8)	4239	NM_010584	ENSMUSG00000038209	Itln1	protein-coding
chr5	114173039	114173215	+	16.8	0.933	intron (NM_133904, intron 1 of 51)	MT2B2|LTR|ERVL	7609	NM_133904	ENSMUSG00000042010	Acacb	protein-coding
chr15	47233289	47233465	+	16.8	0.933	Intergenic	L1Md_A|LINE|L1	610072	NR_045811	ENSMUSG00000051198	4930548G14Rik	ncRNA
chr1	33990913	33991089	+	15.6	0.75	intron (NM_001276764, intron 3 of 102)	intron (NM_001276764, intron 3 of 102)	-20824	NM_133833	ENSMUSG00000026131	Dst	protein-coding
chr12	20233922	20234098	+	15.6	0.65	Intergenic	MMERGLN-int|LTR|ERV1	581769	NR_015521	ENSMUSG00000099759	1700030C10Rik	ncRNA
chr11	69921100	69921276	+	14.4	0.857	promoter-TSS (NM_001166592)	promoter-TSS (NM_001166592)	87	NM_001166595	ENSMUSG00000078812	Eif5a	protein-coding
chr12	17545115	17545291	+	14.4	0.8	intron (NM_013614, intron 1 of 11)	CpG	330	NM_013614	ENSMUSG00000011179	Odc1	protein-coding
chr9	44881426	44881602	+	14.4	0.778	promoter-TSS (NM_001081049)	promoter-TSS (NM_001081049)	-240	NM_001081049	ENSMUSG00000002028	Kmt2a	protein-coding
chr8	72183666	72183842	+	14.4	0.923	Intergenic	Intergenic	-5914	NM_197944	ENSMUSG00000062007	Hsh2d	protein-coding
chr17	3020634	3020810	+	14.4	0.824	Intergenic	Intergenic	63461	NR_003519		Pisd-ps2	pseudo
chr17	36219841	36220017	+	14.4	0.812	Intergenic	Intergenic	-29778	NM_008208	ENSMUSG00000054128	H2-T3	protein-coding
chr12	115621482	115621658	+	13.2	0.722	Intergenic	RMER13B|LTR|ERVK	74224	NR_105810	ENSMUSG00000098336	Mir6388	ncRNA
chr17	36066243	36066419	+	13.2	0.765	Intergenic	Intergenic	-7960	NM_001199967	ENSMUSG00000079492	Gm11127	protein-coding
chr4	45506714	45506890	+	13.2	0.688	intron (NM_001033306, intron 1 of 5)	intron (NM_001033306, intron 1 of 5)	24026	NM_001033306	ENSMUSG00000044813	Shb	protein-coding
chr11	119081133	119081309	+	13.2	0.75	exon (NM_007625, exon 5 of 5)	exon (NM_007625, exon 5 of 5)	5016	NM_007625	ENSMUSG00000039989	Cbx4	protein-coding
chr9	8134122	8134298	+	13.2	0.733	promoter-TSS (NM_001045524)	promoter-TSS (NM_001045524)	84	NM_001045524	ENSMUSG00000040729	Cep126	protein-coding
chr12	111296376	111296552	+	13.2	0.846	exon (NM_183016, exon 31 of 37)	exon (NM_183016, exon 31 of 37)	25368	NM_033603	ENSMUSG00000021278	Amn	protein-coding
chr9	21131240	21131416	+	13.2	0.706	promoter-TSS (NM_018793)	promoter-TSS (NM_018793)	-53	NM_001205312	ENSMUSG00000032175	Tyk2	protein-coding
chr11	51649116	51649292	+	13.2	0.917	intron (NM_145974, intron 1 of 4)	intron (NM_145974, intron 1 of 4)	-1750	NR_027958	ENSMUSG00000052563	D930048N14Rik	ncRNA
chr13	12889752	12889928	+	13.2	0.765	Intergenic	IAPEY2_LTR|LTR|ERVK	-89761	NM_011118	ENSMUSG00000056457	Prl2c3	protein-coding
chr4	82549947	82550123	+	13.2	0.857	Intergenic	MER63B|DNA|hAT-Blackjack	-44256	NM_008687	ENSMUSG00000008575	Nfib	protein-coding
chr8	71508122	71508298	+	13.2	0.765	exon (NM_032398, exon 3 of 6)	exon (NM_032398, exon 3 of 6)	3559	NM_032398	ENSMUSG00000034845	Plvap	protein-coding
chr6	58596307	58596483	+	13.2	0.684	promoter-TSS (NM_011920)	promoter-TSS (NM_011920)	-277	NM_011920	ENSMUSG00000029802	Abcg2	protein-coding
chr8	69801863	69802039	+	13.2	0.857	intron (NM_133224, intron 16 of 25)	intron (NM_133224, intron 16 of 25)	-6736	NM_198101	ENSMUSG00000036246	Gmip	protein-coding
chr1	26687385	26687561	+	13.2	0.706	promoter-TSS (NM_001033764)	promoter-TSS (NM_001033764)	-13	NM_001033764	ENSMUSG00000073722	4931408C20Rik	protein-coding
chr10	60963313	60963489	+	12	0.909	Intergenic	Intergenic	2678	NR_130327	ENSMUSG00000080526	Mir466j	ncRNA
chr15	102065861	102066037	+	12	0.688	Intergenic	Intergenic	-7824	NM_145625	ENSMUSG00000058655	Eif4b	protein-coding
chr8	95070559	95070735	+	12	0.733	intron (NM_001042715, intron 9 of 17)	intron (NM_001042715, intron 9 of 17)	-10554	NM_028805	ENSMUSG00000031787	Katnb1	protein-coding
chr1	36512570	36512746	+	12	0.733	exon (NM_053186, exon 1 of 8)	exon (NM_053186, exon 1 of 8)	782	NM_053186	ENSMUSG00000001138	Cnnm3	protein-coding
chr8	122550206	122550382	+	12	0.647	intron (NM_001037298, intron 1 of 50)	intron (NM_001037298, intron 1 of 50)	1035	NM_001037298	ENSMUSG00000014444	Piezo1	protein-coding
chr12	115567095	115567271	+	12	0.833	Intergenic	Intergenic	128611	NR_105810	ENSMUSG00000098336	Mir6388	ncRNA
chr11	106066654	106066830	+	12	0.733	intron (NM_027346, intron 1 of 4)	intron (NM_027346, intron 1 of 4)	635	NM_027346	ENSMUSG00000001983	Taco1	protein-coding
chr12	101585082	101585258	+	12	0.909	intron (NM_173023, intron 18 of 26)	RMER13B|LTR|ERVK	126403	NM_028924	ENSMUSG00000021187	Tc2n	protein-coding
chr5	148399208	148399384	+	12	0.625	intron (NM_007513, intron 1 of 12)	CpG	608	NM_007513	ENSMUSG00000041313	Slc7a1	protein-coding
chr8	122475871	122476047	+	12	0.571	promoter-TSS (NM_153775)	promoter-TSS (NM_153775)	105	NM_001033142	ENSMUSG00000014470	Rnf166	protein-coding
chr17	23815268	23815444	+	12	0.733	exon (NM_175229, exon 10 of 14)	exon (NM_175229, exon 10 of 14)	12169	NM_175229	ENSMUSG00000039218	Srrm2	protein-coding
chr7	45718083	45718259	+	12	0.867	promoter-TSS (NM_009077)	promoter-TSS (NM_009077)	100	NM_009077	ENSMUSG00000059070	Rpl18	protein-coding
chr8	105496748	105496924	+	12	0.688	promoter-TSS (NM_175160)	promoter-TSS (NM_175160)	34	NM_175160	ENSMUSG00000039199	Zdhhc1	protein-coding
chr2	151494092	151494268	+	12	0.625	promoter-TSS (NM_198326)	promoter-TSS (NM_198326)	-2	NM_001291074	ENSMUSG00000027455	Nsfl1c	protein-coding
chr11	88999188	88999364	+	10.8	0.579	promoter-TSS (NM_009546)	promoter-TSS (NM_009546)	-127	NM_009546	ENSMUSG00000000275	Trim25	protein-coding
chr4	143121384	143121560	+	10.8	0.769	intron (NM_001081355, intron 8 of 9)	intron (NM_001081355, intron 8 of 9)	14690	NR_105988	ENSMUSG00000106597	Mir7021	ncRNA
chr8	95656575	95656751	+	10.8	0.846	Intergenic	GA-rich|Low_complexity|Low_complexity	23104	NM_030198	ENSMUSG00000031669	Gins3	protein-coding
chr8	20599467	20599643	+	10.8	0.917	Intergenic	Intergenic	-15372	NM_001270553		Gm21119	protein-coding
chr11	3290333	3290509	+	10.8	0.588	promoter-TSS (NM_001253691)	promoter-TSS (NM_001253691)	-36	NM_001253690	ENSMUSG00000020453	Patz1	protein-coding
chr7	45686594	45686770	+	10.8	0.786	exon (NM_001033356, exon 2 of 6)	exon (NM_001033356, exon 2 of 6)	2660	NM_001033356	ENSMUSG00000070564	Ntn5	protein-coding
Key
Peak score: Position adjusted reads from initial peak region
Focus ratio: Fraction of tags found at the peak, normalized to 10 million total mapped tags
Region size: length of enriched region
