# Supplementary material for: Stella modulates transcriptional and endogenous retrovirus programs during maternal-to-zygotic transition
Source: eLife journal article supplement (doi:10.7554/elife.22345), 2017-03-21
Supplement: supp [file elife-22345-supp-v1.zip › elife_poa_e22345_Supplementary_File_3.xlsx]

## Sheet: Sheet1
Gene (Figure 2C, Figure 2D)	Forward primer	Reverse primer
Fam175a	GAAGCTAGTCCAGTGCCCACA	TGGTCGTGTGTGTCTAGAGCC
Brip1	AGTGTCCCCAGGTGGCTACTA	GGAAACACCGTGGCTTGCTAC
Rbbp7	TCTGGTGGTTGCTCGAGTTCA	AGCCACCGAATTCTCCCTTGT
Kdm1b	GCATGTGTGAAACGGTAAGTGC	CACAAAGCTCAAGTGCCTAGAAACT
Mapre1	TGATGCGACTACCACGTCCAG	AACACACCCCAAGTTCTGCAC
Pla2g4c	ATCTGCTGCCTTAGTGCCTCC	ACAGGTGGAAGGGATGGAAAGG
Dusp1	GCAGTTTCTTCGCTTGCCTGT	CTCATACGCGCATGTCATCGG
Nop16	TGTACGGAAGCCCTATGTGGT	TTCTCTGGGAGGCTGGCTTCT
Emg1	TGTCCGACCACTTCCCAGTTG	AACTGGGTCACTACTGGGCAC
Larp1b	AAGAATGTCTACGCCCACCCC	GGCTCCTACAGTAACCGCAGT
Ppp1r15b	TGTGAGGCTCTGTACAGGTGG	GGTTGCCACATTTCAGCCCTC
Cdc25c	TGGAGGAGGAAGAGTCTGGCT	GCCACTGTGTCTGGGCTGATA
Socs3	AACCCTCCCCGTTGTGAAGAG	CCCTTCGGTGTTGGAAAAGGC
Hipk1	AGAGCCTGCTTTTGTGGTTGC	TACTGTGCTGGCCTGGCTAAG
Smad7	AGATGCTGTACCTTCCTCCGC	CCCAGGGGCCAGATAATTCGT
TE/gene pair (Figure 4C)
Exoc3l2	TGCCTGAGACACCGACTTCTG	ACTCTTTGCTCGTTCTGGCCT
RMER19A (Exoc3l2)	GACAACATGCACGAACCAGCA	ACCAAGTTCCTGAGGCAGCTT
Atf7ip2	GACCCATGTTGCCACTGTGTG	GGCTGCTTGTATCTGAGGGCT
ORR1A-Int (Atf7ip2)	CCTTCCCTGGCCTCTCACAAA	GAGATGGCCAAGATGCTGCAG
Chka	CTTCTTGCCTTCCCTCTGCCT	CCCAATACCCCACAGACAGCT
ORR1A2-Int (Chka)	AGTGCTACAGAGGGCAGAGCT	AGCCCACGATTCTGGCATCTA
Zfp54	CATGAACCCTCCAACTGTGCC	GGCATCCTGGTCCTTACAGCA
MT2B (Zfp54)	CTTCTTCAACCACTCACCAGCA	GCTCAGTCCCATGAAGCTAGTTG
Chimeric transcript (Figure 4E)
MT2_Mm - Snrpc	TCACAGCTGCGACTGAACCAT	AGGATGCAGACAGGAGGGGTA
MT2B - GM12617	GACTTCCATTCACAGCTGCGG	TGTCTGTCAGGGTCTTCACGA
MT2B - Bex6	TTCACATCCACAGCTGCCCAT	TCCTCCTGTTGCTTTCCCTGG
MT2B - Gpbp1	CGTTGCGTTAGTTGGACTGCA	CAAAGTCATGCTGCGCCATTT
B2_MM - Bri3bp	GCTTCCCGAATGCTGAGATTGA	AGAACATGTCCACTCCCTGCA
MT2B1 - Rbm8a	ATTCTTCGACTTTCTGGACACATCT	CGCCTCGTGAAGATCCAGCA
TE (Figure 5C, Figure 5E)
MuERV-L pol	ATCTCCTGGCACCTGGTATG	AGAAGAAGGCATTTGCCAGA
Dppa3 (Figure 3 - Figure Supplement 2)
Dppa3	GCTAACCCTAAACCCCGGTGT	CAATGCGGTTCCGTAGACTGC
2-cell genes (Fiugre 5 - Figure Supplement 1)
Tcstv1	GACCACCTGAACCATCCATC	CACCTCAGGCTGCAGTTGTA
Gpbp1l1	ACGGGAGATTCTTGGCACCAA	GAAGAGCCATGCCAACCTGTG
GM4340	CGAGGCACTGGGTCTAAGAG	CCAATGAACAGGTCATGCTG
Sp110	CGAACGTGAAGGAGGTGACCA	GAATTGGATGTCTGGGCACGC
Housekeeping gene
ARBP	CAAAGCTGAAGCAAAGGAAGAG	AATTAAGCAGGCTGACTTGGTTG
GAPDH	CCCCAACACTGAGCATCTCC	ATTATGGGGGTCTGGGATGG
PPIA	TTACCCATCAAACCATTCCTTCTG	AACCCAAAGAACTTCAGTGAGAGC
