# Supplementary figures and images for: Stella modulates transcriptional and endogenous retrovirus programs during maternal-to-zygotic transition
Source: eLife journal article supplement (doi:10.7554/elife.22345), 2017-03-21

Figure 1 - Figure Supplement 2

A

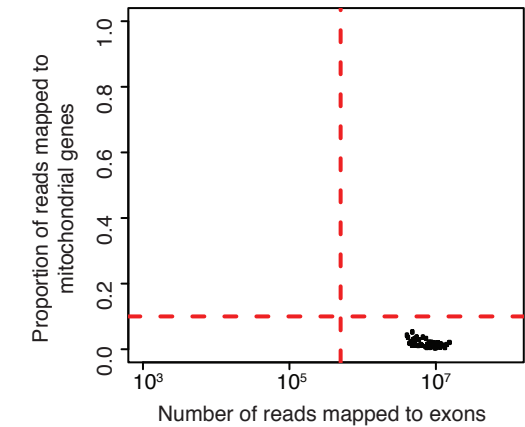

B

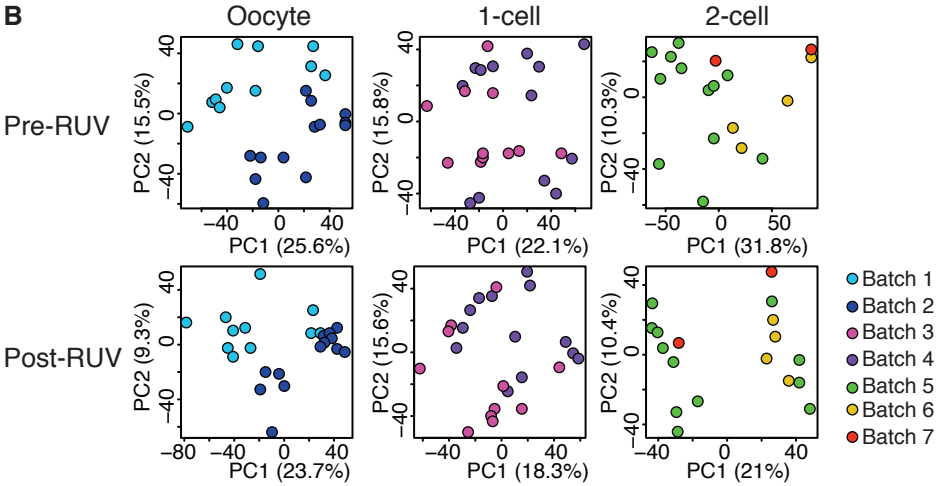

Supplement: supp [file elife-22345-supp-v1.zip]

Figure 3 - Figure Supplement 2

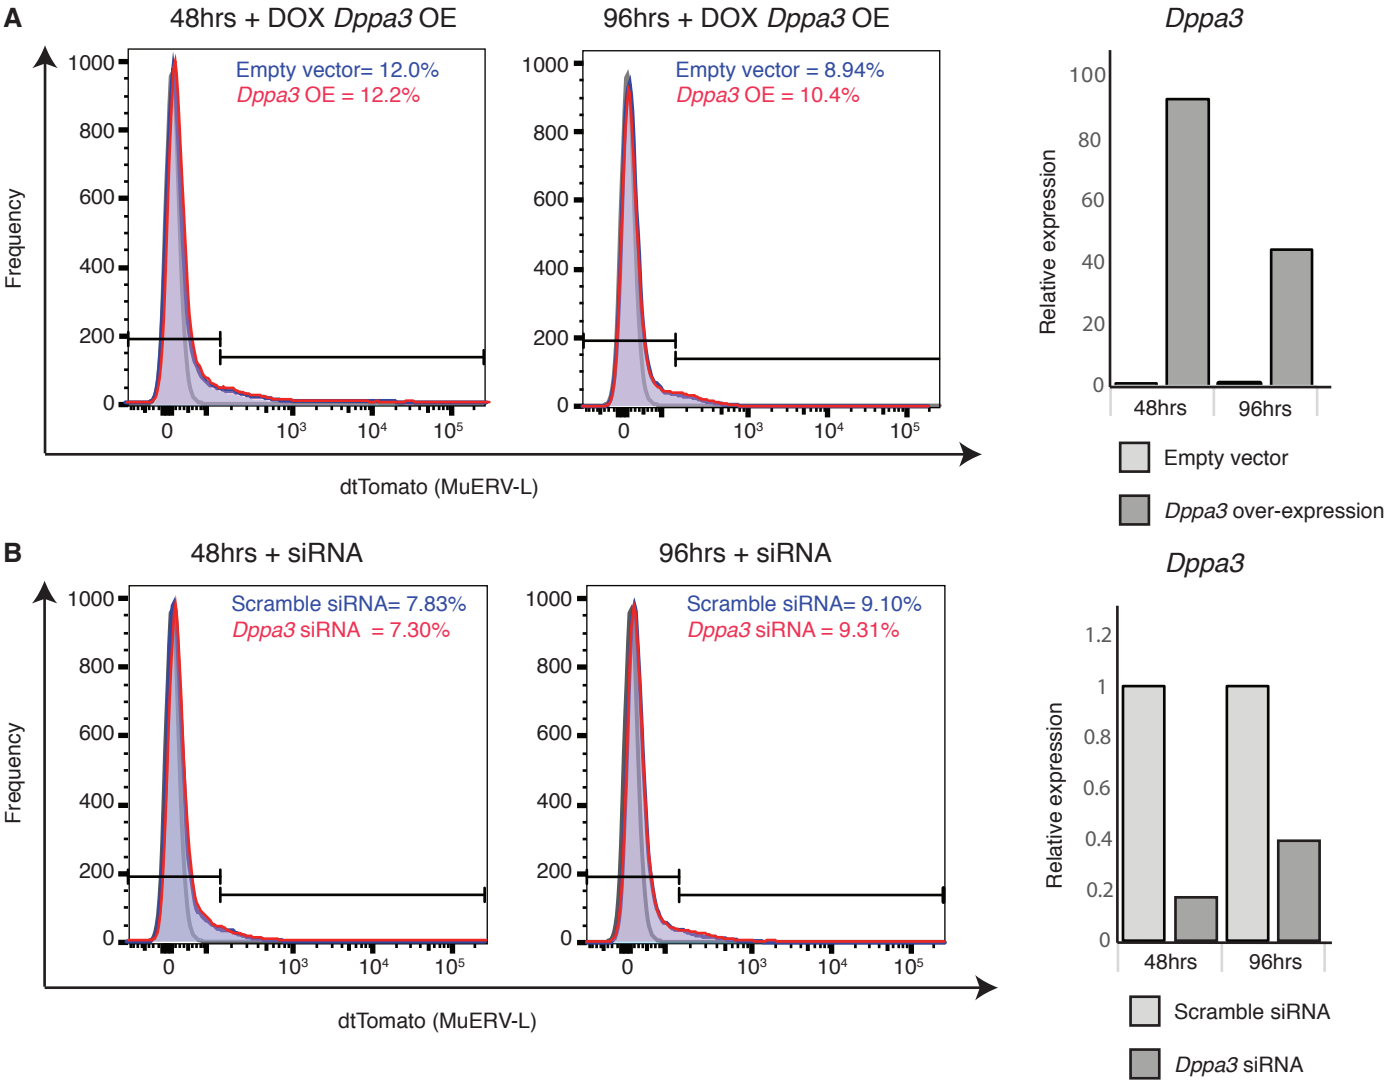

Supplement: supp [file elife-22345-supp-v1.zip]

Figure 4 - Figure Supplement 1

A

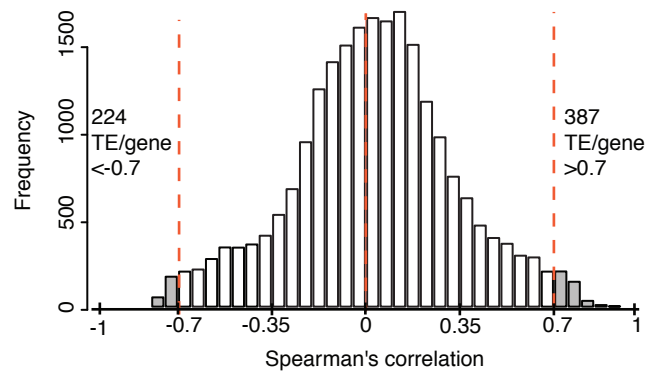

B

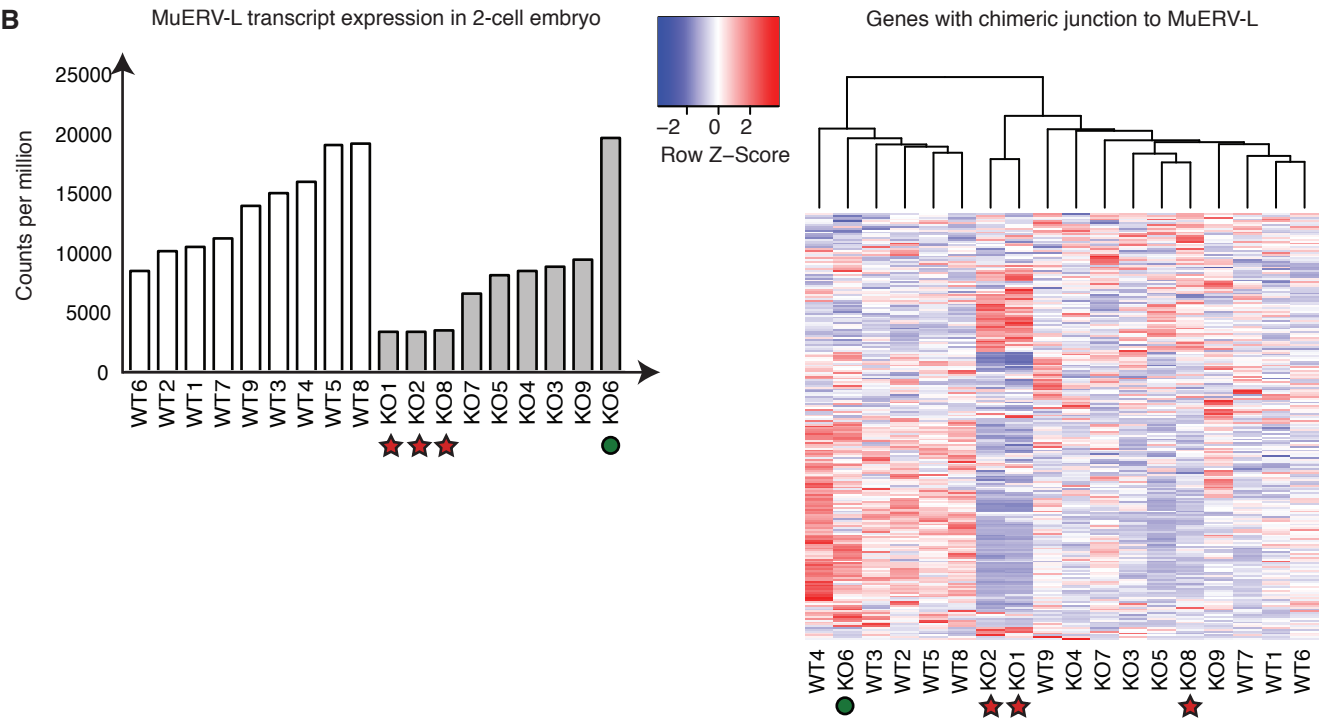

Supplement: supp [file elife-22345-supp-v1.zip]

Figure 2 - Figure Supplement 1

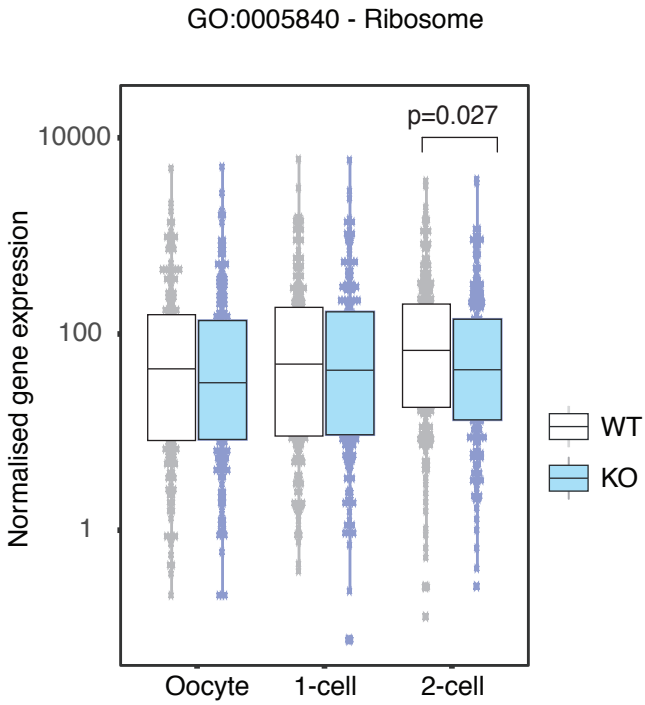

Supplement: supp [file elife-22345-supp-v1.zip]

Figure 5 - Figure Supplement 1

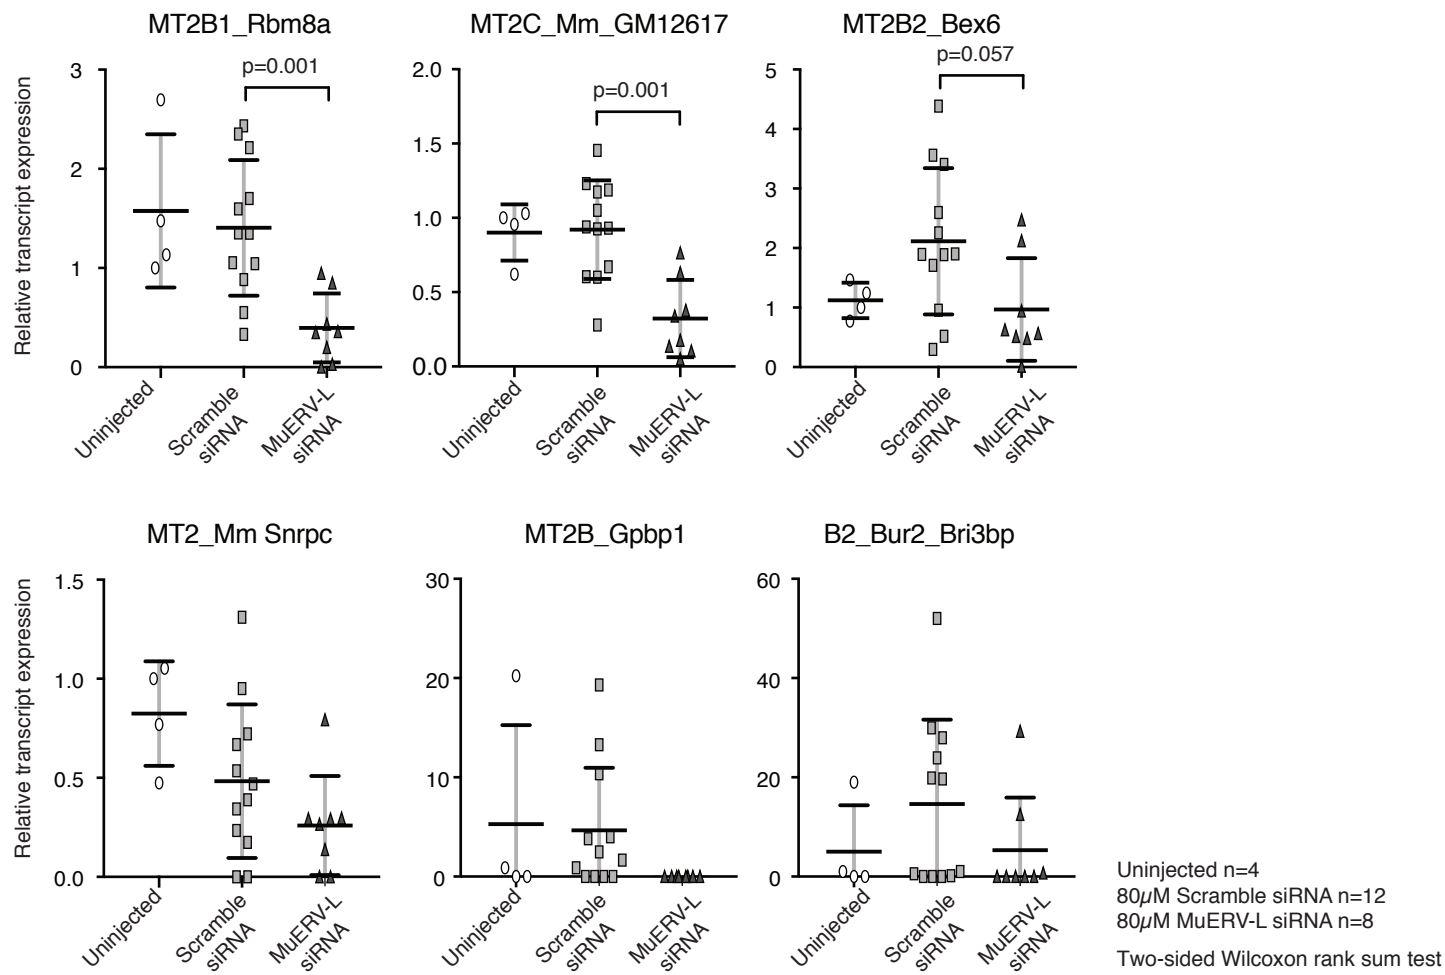

Supplement: supp [file elife-22345-supp-v1.zip]

Figure 3 - Figure Supplement 1

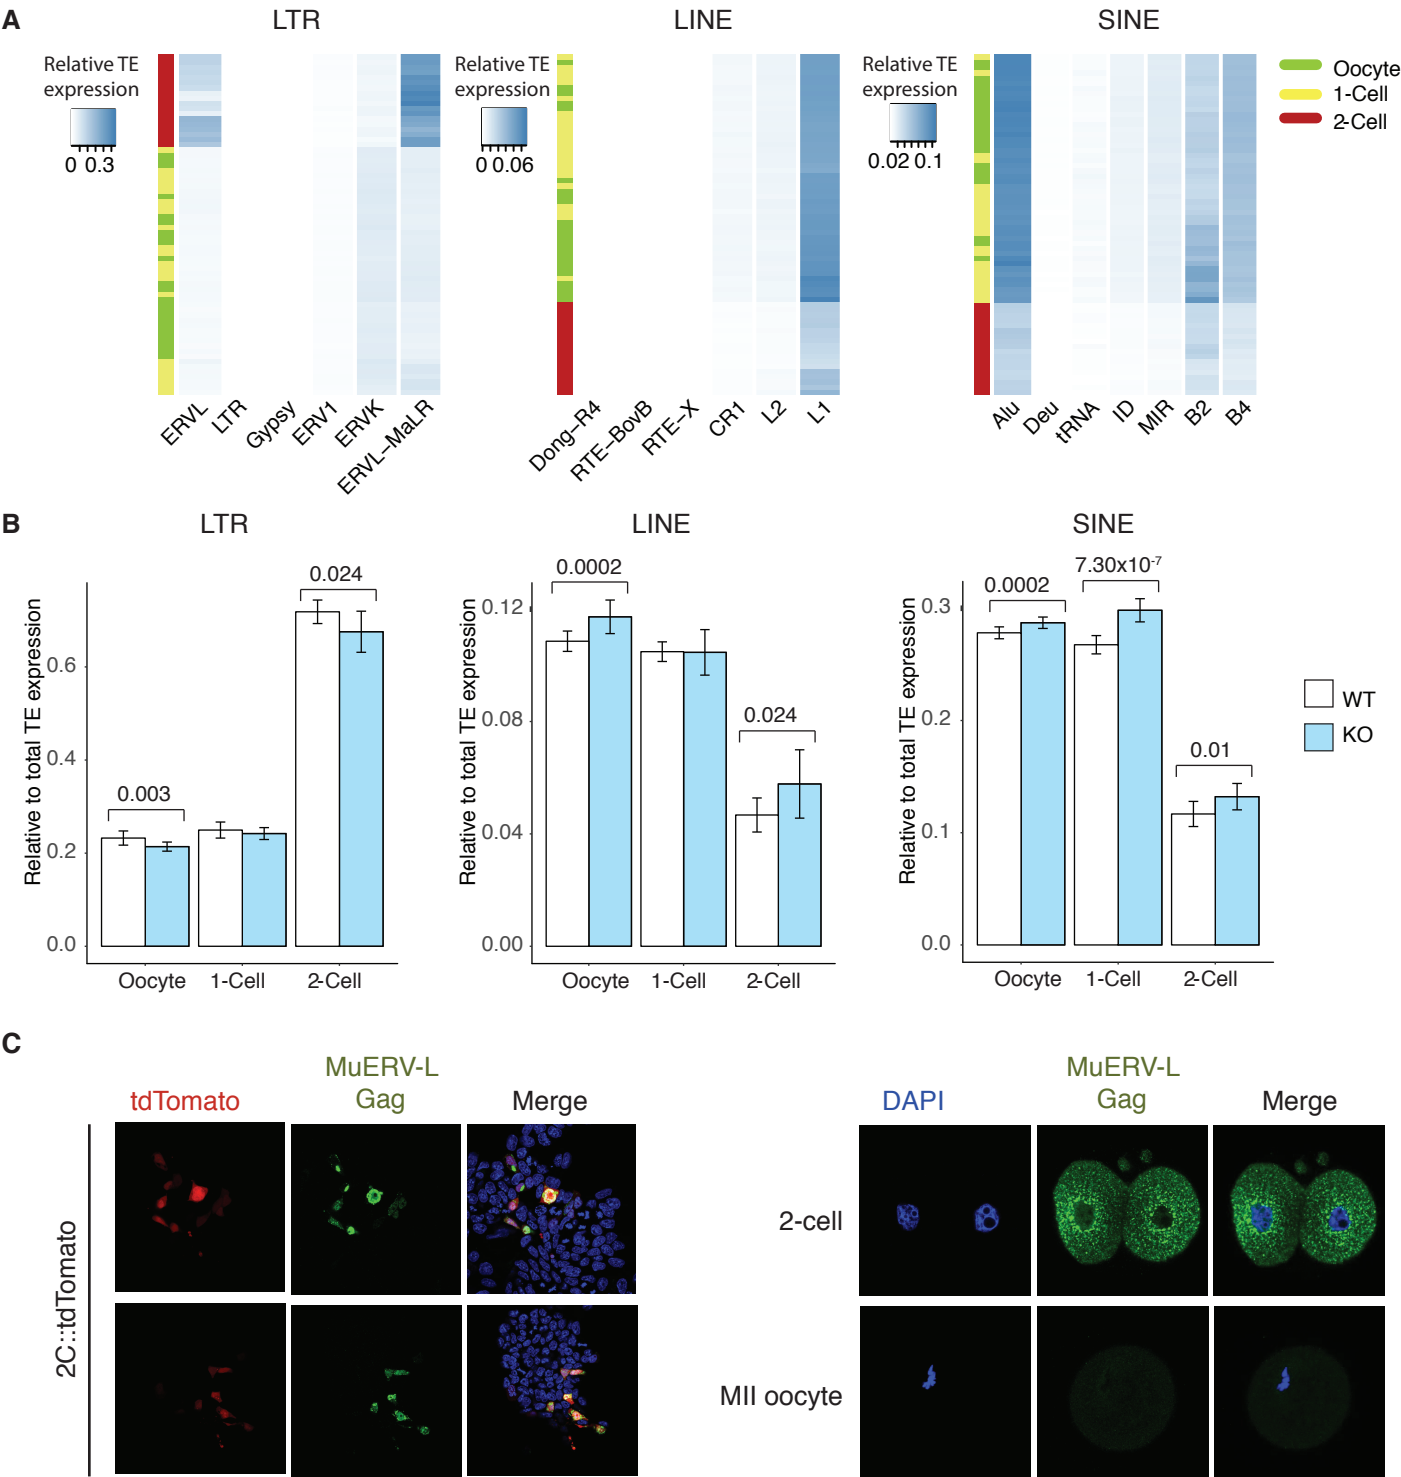

Supplement: supp [file elife-22345-supp-v1.zip]

Figure 1 - Figure Supplement 1

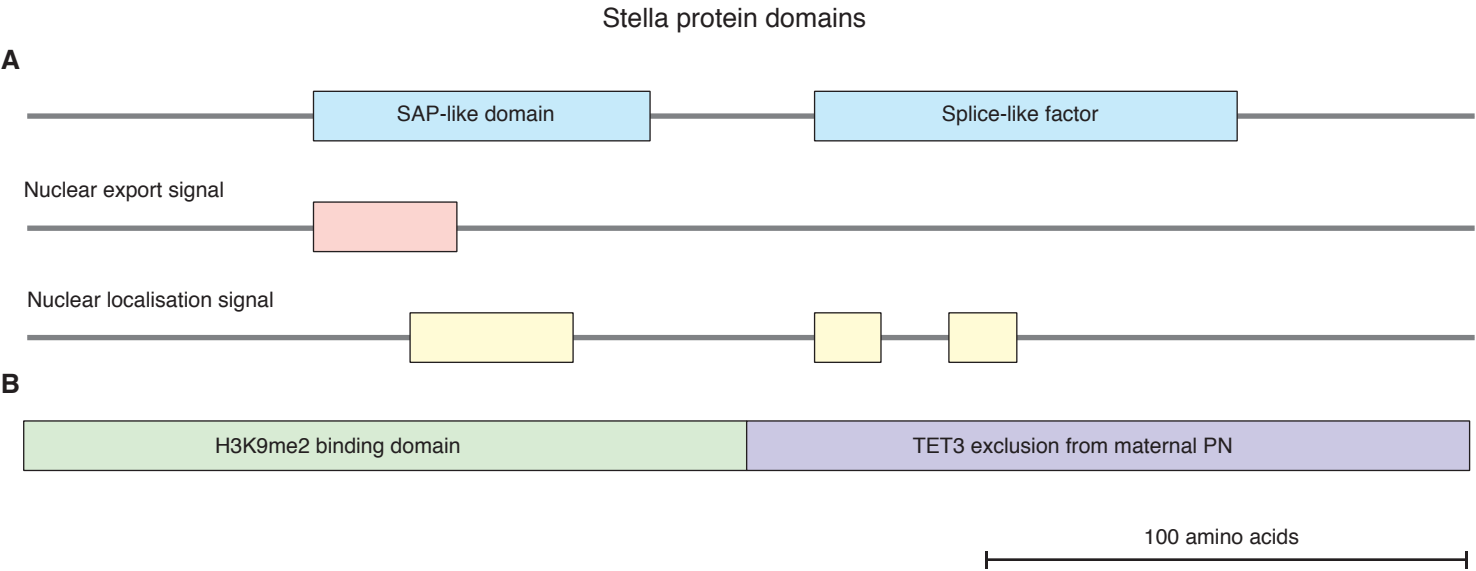

Supplement: supp [file elife-22345-supp-v1.zip › elife_poa_e22345_Figure_1_Figure_Supplement_1.pdf]

Figure 3 - Figure Supplement 3

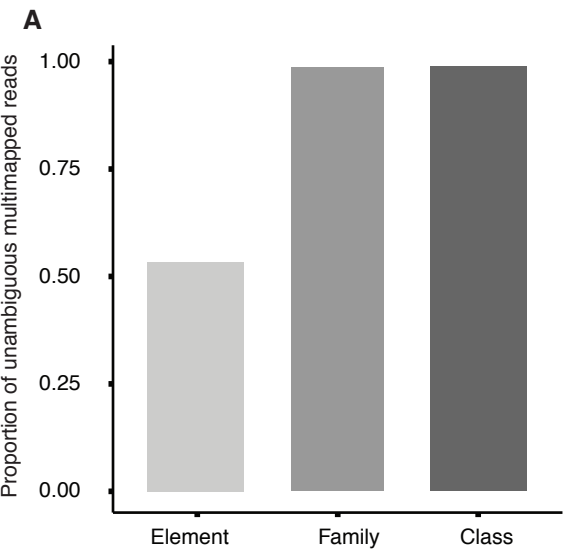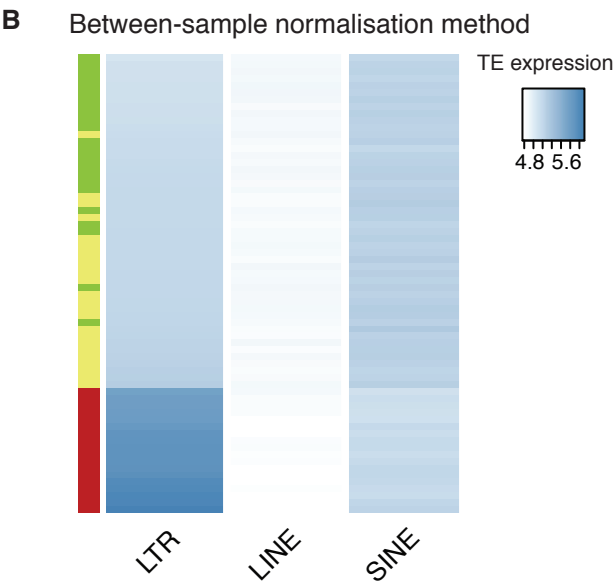

Supplement: supp [file elife-22345-supp-v1.zip › elife_poa_e22345_Figure_3_Figure_Supplement_3.pdf]
